# Supplementary material
Source: PubMed Central journal article supplement (PMC7115826)
Supplement: EMS86622-supplement-Appendix_S1___Supporting_Information.pdf [file EMS86622-supplement-Appendix_S1___Supporting_Information.pdf]

**SUPPLEMENTARY MATERIAL**

**BLOOD PRESSURE AND RISK OF CANCER IN THE EUROPEAN PROSPECTIVE**

**INVESTIGATION INTO CANCER AND NUTRITION**

Christakoudi & Kakourou et al.

**SUPPLEMENTARY TABLES**

|                                                                                                                         |    |
|-------------------------------------------------------------------------------------------------------------------------|----|
| Supplementary Table 1 Definition of cancer locations at anatomical sites and morphological subtypes .....               | 2  |
| Supplementary Table 2 Categories of blood pressure and adjustment variables.....                                        | 5  |
| Supplementary Table 3 EPIC cohort characteristics, cancer cases and blood pressure categories by country .....          | 6  |
| Supplementary Table 4 Baseline demographic, lifestyle and reproductive characteristics by blood pressure category ..... | 9  |
| Supplementary Table 5 Summary of statistical analyses.....                                                              | 13 |

**SUPPLEMENTARY FIGURES**

|                                                                                                                                      |    |
|--------------------------------------------------------------------------------------------------------------------------------------|----|
| Supplementary Figure 1 Forest plot of hazard ratios for sub-group analyses of continuous systolic and diastolic blood pressure ..... | 13 |
| Supplementary Figure 2 Sensitivity analysis – first two years of follow-up excluded .....                                            | 14 |
| Supplementary Figure 3 Sensitivity analysis – crude (unadjusted) hazard ratio estimates .....                                        | 15 |

**SUPPLEMENTARY RESULTS AND DISCUSSION**

|                                                        |    |
|--------------------------------------------------------|----|
| Malignant melanoma.....                                | 16 |
| Cancers of the liver, gallbladder and bile ducts ..... | 16 |
| Pancreas.....                                          | 16 |
| Bladder .....                                          | 17 |
| Ovary .....                                            | 17 |
| Thyroid.....                                           | 17 |
| Brain and central nervous system (CNS) .....           | 17 |
| Other locations .....                                  | 18 |
| Adjustment for antihypertensive treatment .....        | 18 |

|                                |    |
|--------------------------------|----|
| SUPPLEMENTARY REFERENCES ..... | 19 |
|--------------------------------|----|

**SUPPLEMENTARY TABLES****Supplementary Table 1 Definition of cancer locations at anatomical sites and morphological subtypes**

| <b>Cancer location<br/>Subtype</b>  | <b>Topographical<br/>codes</b>                                                | <b>Morphology<br/>(specific codes)</b>                                                   | <b>Rare morphologies<br/>(excluded codes)</b>                                                           | <b>Note</b>                   |
|-------------------------------------|-------------------------------------------------------------------------------|------------------------------------------------------------------------------------------|---------------------------------------------------------------------------------------------------------|-------------------------------|
| <b>Head and Neck</b>                | C02, C03, C04,<br>C05, C06, C09,<br>C10, C11, C12,<br>C13, C14.0, C30,<br>C32 | -                                                                                        | 8800, 8850, 9120, 9220,<br>9591, 9673, 9680, 9690,<br>9691, 9734                                        | 89%<br>(n=605)<br>SCC         |
| Mouth and oropharynx                | C02, C03, C04,<br>C05, C06, C09,<br>C10,                                      | -                                                                                        | as for Head & Neck                                                                                      | 90%<br>(n=297)<br>SCC         |
| Larynx                              | C32                                                                           | -                                                                                        | as for Head & Neck                                                                                      | 93%<br>(n=221)<br>SCC         |
| <b>Digestive system</b>             |                                                                               |                                                                                          |                                                                                                         |                               |
| <b>Esophagus</b>                    | C15                                                                           | -                                                                                        | 8170, 8720, 9591                                                                                        |                               |
| Esophageal AC                       | C15                                                                           | 8140, 8144                                                                               | -                                                                                                       |                               |
| Esophageal SCC                      | C15                                                                           | 8070, 8071, 8072                                                                         | -                                                                                                       |                               |
| <b>Stomach</b>                      | C16                                                                           | -                                                                                        | 8560, 8800, 8891, 8936,<br>9590, 9591, 9595, 9663,<br>9670, 9676, 9680, 9699,<br>9702, 9711, 9715, 9823 |                               |
| Gastric AC                          | C16                                                                           | 8140                                                                                     | -                                                                                                       |                               |
| <b>Colorectal</b>                   | C18, C19, C20                                                                 | -                                                                                        | 8240, 8241, 8243, 8245,<br>8246, 8472, 8743, 8936,<br>9680, 9699                                        | 75%<br>(n=3,489)<br>code 8140 |
| Colon                               | C18                                                                           | -                                                                                        | as for Colorectal                                                                                       | 72%<br>(n=2,175)<br>code 8140 |
| Rectum and rectosigmoid<br>junction | C19, C20                                                                      | -                                                                                        | as for Colorectal                                                                                       | 81%<br>(n=1,314)<br>code 8140 |
| <b>Liver</b>                        | C22, C23, C24                                                                 | -                                                                                        | 9120, 9130, 9590, 9680                                                                                  | ##                            |
| Hepatocellular Cancer               | C22.0                                                                         | 8170, 8180                                                                               | -                                                                                                       |                               |
| Gallbladder and bile<br>ducts       | C22.1, C23, C24                                                               |                                                                                          |                                                                                                         |                               |
| <b>Pancreas</b>                     | C25                                                                           | -                                                                                        | 8150, 8151, 8152, 8246,<br>9591                                                                         |                               |
| <b>Respiratory system</b>           |                                                                               |                                                                                          |                                                                                                         |                               |
| <b>Lung</b>                         | C34                                                                           | -                                                                                        | 8710, 8800, 8801, 8990,<br>9050, 9120, 9133, 9591,<br>9680, 9699                                        |                               |
| Lung AC                             | C34                                                                           | 8140, 8144, 8230,<br>8250, 8253, 8254,<br>8256, 8257, 8260,<br>8265, 8333, 8480,<br>8551 | -                                                                                                       | 91%<br>(n=1,027)<br>code 8140 |
| Lung SCC                            | C34                                                                           | 8070, 8071, 8072,<br>8083                                                                | -                                                                                                       |                               |
| Lung SmallCC                        | C34                                                                           | 8041, 8045                                                                               | -                                                                                                       |                               |

|                                         |                        |                                                    |                                                                  |     |
|-----------------------------------------|------------------------|----------------------------------------------------|------------------------------------------------------------------|-----|
| Lung (other morphology)                 | C34                    | any not excluded and not included above            |                                                                  | *** |
| <b>Urinary system</b>                   |                        |                                                    |                                                                  |     |
| <b>Kidney</b>                           | C64                    | -                                                  | 8800, 8830, 8890, 8964                                           |     |
| <b>Renal pelvis and ureter</b>          | C65, C66               | -                                                  |                                                                  | *   |
| <b>Bladder</b>                          | C67                    | -                                                  | 8800, 8801, 8980, 9590, 9671                                     | #   |
| <b>Reproductive system</b>              |                        |                                                    |                                                                  |     |
| <b>Prostate (men)</b>                   | C61                    | -                                                  |                                                                  |     |
| <b>Breast (women)</b>                   | C50 (women)            | -                                                  | 8801, 8804, 8810, 8980, 8982, 9020, 9120, 9590, 9675, 9690, 9691 |     |
| <b>Ovary (women)</b>                    | C56, C48, C57.0        | -                                                  | 8890, 8980, 9680                                                 |     |
| <b>Corpus uteri (women)</b>             | C54 (women)            | -                                                  | 8890, 8930, 8931, 8933, 8935, 8950, 8951, 8980, 9100             | **  |
| Uterine AC                              | C54 (women)            | 8140                                               | -                                                                |     |
| Endometroid AC                          | C54 (women)            | 8380                                               | -                                                                |     |
| <b>Cervix uteri (women)</b>             | C53                    | -                                                  | -                                                                |     |
| Cervix SCC                              | C53                    | 8070, 8071, 8072, 8076, 8083                       | -                                                                | ### |
| Cervix AC                               | C53                    | 8140                                               | -                                                                | ### |
| Cervix (other morphology)               | C53                    | any not accounted for above                        | -                                                                |     |
| <b>Anogenital (not cervix)</b>          | C21, C51, C52, C60     | -                                                  | -                                                                |     |
| Anogenital SCC                          | C21, C51, C52, C60     | 8070, 8071, 8072, 8083                             | -                                                                |     |
| <b>Skin</b>                             |                        |                                                    |                                                                  |     |
| <b>Skin (SCC)</b>                       | C44                    | 8070, 8071, 8072, 8083                             | -                                                                |     |
| <b>Melanoma (skin)</b>                  | C44                    | 8720 – 8780                                        | -                                                                |     |
| <b>Nervous and endocrine system</b>     |                        |                                                    |                                                                  |     |
| <b>Brain and central nervous system</b> | C70, C71, C72          | -                                                  | 8420, 8510, 9120, 9150, 9473, 9490, 9590, 9591, 9680, 9702, 9732 |     |
| Glioblastoma                            | C71                    | 9440                                               |                                                                  |     |
| <b>Thyroid</b>                          | C73                    | -                                                  | 8012, 8021, 8041, 8345, 8510, 8511, 9680                         |     |
| <b>Hematopoietic system</b>             |                        |                                                    |                                                                  |     |
| <b>Leukemia</b>                         | C42                    | 9700 – 9709, 9731 – 9989                           | -                                                                |     |
| Multiple myeloma                        | C42                    | 9731, 9732                                         | -                                                                |     |
| <b>Lymphoma (all types)</b>             | C77                    | 9590 – 9595, 9650 – 9761, 9820 – 9837, 9940 – 9945 | -                                                                |     |
| Non-Hodgkin Lymphomas                   | C77                    | 9591, 9670 – 9719                                  | -                                                                |     |
| <b>Other</b>                            |                        |                                                    |                                                                  |     |
| <b>Other location AC</b>                | any not included above | 8140                                               |                                                                  |     |

| <b>Other location or morphology</b> | any remaining, not accounted for above | any not accounted for above, including rare morphologies |  |  |
|-------------------------------------|----------------------------------------|----------------------------------------------------------|--|--|
|-------------------------------------|----------------------------------------|----------------------------------------------------------|--|--|

The order of the main anatomical sites, as in Figure 2, is according to the hazard ratio estimates for systolic blood pressure from the main adjusted analyses (specific locations and morphologies follow the relevant main anatomical site and other locations are listed last); All morphological codes had behavioural code 3 (xxxx/3) according to the International Classification of Diseases for Oncology (ICD-O) (<http://codes.iarc.fr/abouticdo.php>; Accessed: 24/01/2019); **AC** – adenocarcinoma; **SCC** – squamous cell carcinoma; **SmallCC** – small cell carcinoma; \* renal pelvis and ureter cancers (n=112 cases) were 93% (n=104) with transitional-cell morphology (codes 8120/3 or 8130/3); \*\* corpus uteri cancers (n=1164) included 42% (n=488) AC (code 8140/3) and 47% (n=546) endometroid adenocarcinoma (code 8380/3); \*\*\* lung (other morphology) (n=1107) included: 50% (n=550) undifferentiated or unspecified (codes 8000/3, 8010/3 or 8020/3), 19% (n=207) non-small cell carcinoma (code 8046/3); # bladder cancers (n=1,192) comprised 89% (n=1,058) transitional-cell morphology (codes 8120/3 or 8130/3); ## liver cancers (n=653) comprised: 47% (n=307) cancers of the liver parenchyma (of which 62% (n=191) were with hepatocellular morphology), 11% (n=71) cancers of the intrahepatic bile ducts, 13% (n=86) cancers of the gallbladder, 29% (n=189) cancers of the extrahepatic bile ducts; ### cervical AC (n=37) and cervix (other morphology) (n=41) were considered only in the main analyses for continuous blood pressure variables, due to the small number of cases.

**Supplementary Table 2 Categories of blood pressure and adjustment variables**

| Variable (units of measurement)                     | Categories used in models                                                                                                                                                                                                                                                                                                                                                                                        |
|-----------------------------------------------------|------------------------------------------------------------------------------------------------------------------------------------------------------------------------------------------------------------------------------------------------------------------------------------------------------------------------------------------------------------------------------------------------------------------|
| hypertension (dichotomous)                          | SBP $\geq$ 140 mmHg, or DBP $\geq$ 90 mmHg at BP measurement visit, or self-reported hypertension                                                                                                                                                                                                                                                                                                                |
| hypertension<br>(American Society for Hypertension) | pre-hypertension (SBP 120–139 mmHg or DBP in 80–89 mmHg);<br>hypertension stage I (SBP 140-159mmHg or DBP 90-99mmHg);<br>hypertension stage II (SBP >160mmHg or DBP >100mmHg)                                                                                                                                                                                                                                    |
| hypertension<br>(European Society for Hypertension) | optimal (SBP<120mmHg and DBP<80mmHg);<br>normal (SBP 120-129mmHg and DBP 80-84mmHg);<br>high normal (SBP 130-139mmHg and/or DBP 85-89mmHg);<br>grade I hypertension (SBP 140-159mmHg or DBP 90-99mmHg);<br>grade II hypertension (SBP 160-179mmHg or DBP 100-109mmHg);<br>grade III hypertension (SBP $\geq$ 180mmHg or DBP $\geq$ 110mmHg) and<br>isolated systolic hypertension (elevated SBP with normal DBP) |
| mean blood pressure (MBP)                           | Cohort-wide quartiles (cut-points at: 88.8, 96.7, 106.0 mmHg)                                                                                                                                                                                                                                                                                                                                                    |
| sex                                                 | men, women                                                                                                                                                                                                                                                                                                                                                                                                       |
| body mass index (kg/m <sup>2</sup> )                | cohort-wide quintiles (cut-points at: 22.3, 24.3, 26.2, 28.9 kg/m <sup>2</sup> )                                                                                                                                                                                                                                                                                                                                 |
| diabetes mellitus (self-reported)                   | yes, no, missing                                                                                                                                                                                                                                                                                                                                                                                                 |
| educational attainment                              | none, primary school, technical/professional school, secondary school, longer education, missing                                                                                                                                                                                                                                                                                                                 |
| physical activity                                   | inactive, moderately inactive, moderately active, active                                                                                                                                                                                                                                                                                                                                                         |
| smoking status                                      | never, former, current smoker $\leq$ 20 pack years, current smoker >20 pack years, missing                                                                                                                                                                                                                                                                                                                       |
| alcohol intake (g/day)                              | cohort-wide quintiles (cut-points at: 0.6, 3.5, 9.4, 20.6 g/day)                                                                                                                                                                                                                                                                                                                                                 |
| fruit consumption (g/day)                           | cohort-wide quintiles (cut-points at: 92, 155, 236, 345 g/day)                                                                                                                                                                                                                                                                                                                                                   |
| vegetable consumption (g/day)                       | cohort-wide quintiles (cut-points at: 93, 137, 193, 290 g/day)                                                                                                                                                                                                                                                                                                                                                   |
| red meat consumption (g/day)                        | cohort-wide quintiles (cut-points at: 16.5, 32.7, 50.9, 75.6 g/day)                                                                                                                                                                                                                                                                                                                                              |
| age at first period (menarche)<br>(years)*          | <12 years, 12-15 years, >15 years, missing                                                                                                                                                                                                                                                                                                                                                                       |
| age at first full-term pregnancy<br>(years)*        | $\leq$ 21 years, 21-30 years, >30 years, missing                                                                                                                                                                                                                                                                                                                                                                 |
| number of full-term pregnancies *                   | 0, 1, 2, 3, $\geq$ 4, missing                                                                                                                                                                                                                                                                                                                                                                                    |
| menopausal status *                                 | pre-menopausal (self-reported or age at recruitment <46 years if missing), peri-menopausal or unknown, physiological post-menopausal (self-reported or age $\geq$ 55 years if missing), surgical post-menopausal (self-reported)                                                                                                                                                                                 |
| age at menopause (years) *                          | <40 years, 40-46 years, 46-50 years, 50-56 years, >56 years, missing or not relevant                                                                                                                                                                                                                                                                                                                             |
| oral contraceptives use *                           | never, former, current, missing                                                                                                                                                                                                                                                                                                                                                                                  |
| hormone replacement therapy use *                   | never, former, current, missing                                                                                                                                                                                                                                                                                                                                                                                  |

\* reproductive variables used for adjustment in female cancers (breast, ovary, cervix and corpus uteri)

Supplementary Table 3 EPIC cohort characteristics, cancer cases and blood pressure categories by country

|                                             | <b>Total</b>  | <b>Denmark</b> | <b>France</b> | <b>Germany</b> | <b>Greece</b> | <b>Italy</b> | <b>Netherlands</b> | <b>Spain</b> | <b>Sweden</b> | <b>UK</b>    |
|---------------------------------------------|---------------|----------------|---------------|----------------|---------------|--------------|--------------------|--------------|---------------|--------------|
| <b>Cohort size: N</b>                       | 307318        | 54961          | 19195         | 33048          | 25854         | 43109        | 36517              | 6273         | 48184         | 40177        |
| <b>Age at recruitment, years: mean (SD)</b> | 52.5 (9.9)    | 56.7 (4.4)     | 52.8 (6.5)    | 50.3 (8.8)     | 53.1 (12.6)   | 50.5 (7.9)   | 49 (11.9)          | 50.3 (8.4)   | 52 (10.9)     | 54.6 (11.5)  |
| <b>Female: N (%)</b>                        | 194727 (63.4) | 28691 (52.2)   | 19195 (100)   | 19342 (58.5)   | 15123 (58.5)  | 29659 (68.8) | 26890 (73.6)       | 4231 (67.4)  | 26119 (54.2)  | 25477 (63.4) |
| <b>Person years: mean (SD) #</b>            | 13.7 (4.4)    | 14.8 (4.1)     | 9.8 (2.4)     | 9.6 (2.7)      | 10.8 (3.7)    | 14.1 (3.1)   | 14.4 (3.3)         | 14.6 (2.8)   | 16.4 (5)      | 14.7 (4)     |
| <b>Cancer cases: N</b>                      |               |                |               |                |               |              |                    |              |               |              |
| Any malignant cancer                        | 39298         | 11043          | 1256          | 2551           | 1266          | 4551         | 3767               | 604          | 8479          | 5781         |
| <b>Head and neck</b>                        |               |                |               |                |               |              |                    |              |               |              |
| Head and neck (combined)                    | 683           | 261            | 0             | 51             | 22            | 72           | 69                 | 19           | 116           | 73           |
| * Mouth and oropharynx                      | 332           | 131            | 0             | 21             | 3             | 31           | 35                 | 5            | 67            | 39           |
| * Larynx                                    | 239           | 95             | 0             | 18             | 16            | 31           | 22                 | 9            | 27            | 21           |
| <b>Digestive system</b>                     |               |                |               |                |               |              |                    |              |               |              |
| Esophagus                                   | 387           | 133            | 1             | 17             | 4             | 11           | 42                 | 4            | 67            | 108          |
| * Esophageal AC                             | 176           | 50             | 0             | 7              | 2             | 3            | 15                 | 1            | 31            | 67           |
| * Esophageal SCC                            | 149           | 58             | 1             | 7              | 1             | 6            | 18                 | 2            | 30            | 26           |
| Stomach                                     | 738           | 169            | 4             | 58             | 62            | 129          | 61                 | 15           | 150           | 90           |
| * Gastric AC                                | 403           | 98             | 1             | 11             | 9             | 52           | 29                 | 5            | 123           | 75           |
| Colorectal                                  | 4625          | 1317           | 96            | 267            | 126           | 562          | 510                | 89           | 921           | 737          |
| * Colon                                     | 3003          | 804            | 63            | 165            | 82            | 417          | 328                | 68           | 592           | 484          |
| * Rectum and rectosigmoid junction          | 1622          | 513            | 33            | 102            | 44            | 145          | 182                | 21           | 329           | 253          |
| Liver and bile ducts                        | 653           | 177            | 2             | 57             | 56            | 108          | 42                 | 12           | 134           | 65           |
| * HCC                                       | 191           | 48             | 0             | 19             | 14            | 38           | 7                  | 1            | 41            | 23           |
| * Gallbladder and bile ducts                | 346           | 89             | 2             | 31             | 22            | 48           | 33                 | 7            | 74            | 40           |
| Pancreas                                    | 990           | 325            | 16            | 70             | 44            | 102          | 96                 | 13           | 203           | 121          |
| <b>Respiratory system</b>                   |               |                |               |                |               |              |                    |              |               |              |
| Lung (combined)                             | 3229          | 1257           | 1             | 193            | 175           | 293          | 338                | 37           | 548           | 387          |
| * Lung AC                                   | 1130          | 485            | 1             | 69             | 33            | 107          | 109                | 8            | 220           | 98           |
| * Lung SCC                                  | 613           | 246            | 0             | 31             | 20            | 46           | 65                 | 8            | 108           | 89           |
| * Lung SmallCC                              | 379           | 198            | 0             | 32             | 16            | 21           | 62                 | 5            | 2             | 43           |
| * Lung (other morphology)                   | 1107          | 328            | 0             | 61             | 106           | 119          | 102                | 16           | 218           | 157          |
| <b>Urinary system</b>                       |               |                |               |                |               |              |                    |              |               |              |
| Kidney                                      | 758           | 185            | 1             | 96             | 29            | 122          | 70                 | 11           | 138           | 106          |
| Renal pelvis and ureter                     | 112           | 41             | 0             | 3              | 1             | 8            | 10                 | 1            | 29            | 19           |
| Bladder                                     | 1192          | 260            | 2             | 80             | 56            | 134          | 65                 | 32           | 403           | 160          |
| <b>Reproductive system</b>                  |               |                |               |                |               |              |                    |              |               |              |
| Prostate                                    | 5848          | 1878           | 0             | 495            | 96            | 459          | 214                | 93           | 1817          | 796          |
| Breast (female)                             | 8154          | 1863           | 830           | 478            | 240           | 1174         | 1043               | 103          | 1301          | 1122         |
| * Breast pre-menopausal                     | 256           | 0              | 0             | 39             | 28            | 60           | 42                 | 5            | 41            | 41           |
| * Breast post-menopausal                    | 4786          | 1451           | 388           | 263            | 142           | 534          | 582                | 38           | 715           | 673          |
| Ovary                                       | 1007          | 224            | 55            | 51             | 44            | 129          | 132                | 11           | 175           | 186          |

|                                        | Total         | Denmark      | France       | Germany      | Greece       | Italy        | Netherlands  | Spain        | Sweden       | UK           |
|----------------------------------------|---------------|--------------|--------------|--------------|--------------|--------------|--------------|--------------|--------------|--------------|
| Corpus uteri                           | 1164          | 262          | 68           | 64           | 19           | 175          | 140          | 35           | 243          | 158          |
| * Uterine AC                           | 488           | 22           | 21           | 4            | 6            | 103          | 37           | 8            | 229          | 58           |
| * Endometroid AC                       | 546           | 204          | 42           | 52           | 5            | 52           | 87           | 22           | 4            | 78           |
| Cervix uteri                           | 223           | 56           | 2            | 21           | 21           | 26           | 32           | 7            | 33           | 25           |
| * Cervix SCC                           | 145           | 44           | 0            | 14           | 7            | 16           | 22           | 6            | 23           | 13           |
| * Cervix AC                            | 37            | 8            | 1            | 2            | 2            | 6            | 5            | 0            | 8            | 5            |
| * Cervix (other morphology)            | 41            | 4            | 1            | 5            | 12           | 4            | 5            | 1            | 2            | 7            |
| Anogenital (not cervix)                | 244           | 66           | 4            | 25           | 12           | 24           | 19           | 0            | 56           | 38           |
| * Anogenital SCC                       | 173           | 45           | 3            | 15           | 5            | 12           | 17           | 0            | 49           | 27           |
| <b>Skin</b>                            |               |              |              |              |              |              |              |              |              |              |
| Skin SCC                               | 1399          | 400          | 16           | 13           | 2            | 40           | 124          | 15           | 430          | 359          |
| Melanoma (skin)                        | 1617          | 444          | 80           | 107          | 22           | 143          | 171          | 15           | 379          | 256          |
| <b>Nervous and endocrine system</b>    |               |              |              |              |              |              |              |              |              |              |
| Brain and CNS                          | 591           | 160          | 1            | 45           | 19           | 91           | 58           | 13           | 105          | 99           |
| * Glioblastoma                         | 297           | 95           | 0            | 26           | 6            | 39           | 17           | 2            | 51           | 61           |
| Thyroid                                | 420           | 41           | 59           | 65           | 37           | 118          | 17           | 20           | 39           | 24           |
| <b>Hematopoietic system</b>            |               |              |              |              |              |              |              |              |              |              |
| Leukemia                               | 1308          | 315          | 0            | 88           | 41           | 170          | 143          | 24           | 305          | 222          |
| * Multiple myeloma                     | 475           | 110          | 0            | 35           | 14           | 69           | 39           | 3            | 131          | 74           |
| Lymphoma (all types)                   | 1058          | 329          | 0            | 39           | 24           | 99           | 65           | 10           | 276          | 216          |
| * Non-Hodgkin lymphomas                | 882           | 287          | 0            | 31           | 18           | 86           | 59           | 10           | 208          | 183          |
| <b>Other</b>                           |               |              |              |              |              |              |              |              |              |              |
| Other location AC                      | 406           | 109          | 0            | 15           | 4            | 47           | 54           | 2            | 118          | 57           |
| Other location or other morphology     | 2492          | 771          | 18           | 153          | 110          | 315          | 252          | 23           | 493          | 357          |
| <b>Systolic Blood Pressure, N (%)</b>  |               |              |              |              |              |              |              |              |              |              |
| < 120 mmHg                             | 86141 (28.0)  | 8691 (15.8)  | 7918 (41.3)  | 10421 (31.5) | 8151 (31.5)  | 12446 (28.9) | 14872 (40.7) | 2202 (35.1)  | 10487 (21.8) | 10953 (27.3) |
| 120-129 mmHg                           | 66446 (21.6)  | 9787 (17.8)  | 4351 (22.7)  | 8117 (24.6)  | 5511 (21.3)  | 10206 (23.7) | 8108 (22.2)  | 1414 (22.5)  | 10182 (21.1) | 8770 (21.8)  |
| 130-139 mmHg                           | 57482 (18.7)  | 10356 (18.8) | 3412 (17.8)  | 6653 (20.1)  | 4180 (16.2)  | 8812 (20.4)  | 6074 (16.6)  | 1163 (18.5)  | 8935 (18.5)  | 7897 (19.7)  |
| 140-159 mmHg                           | 68235 (22.2)  | 17674 (32.2) | 2787 (14.5)  | 5894 (17.8)  | 5392 (20.9)  | 8746 (20.3)  | 5242 (14.4)  | 1124 (17.9)  | 12192 (25.3) | 9184 (22.9)  |
| 160-179 mmHg                           | 22656 (7.4)   | 6266 (11.4)  | 607 (3.2)    | 1607 (4.9)   | 2056 (8.0)   | 2334 (5.4)   | 1781 (4.9)   | 303 (4.8)    | 4953 (10.3)  | 2749 (6.8)   |
| >= 180 mmHg                            | 6358 (2.1)    | 2187 (4.0)   | 120 (0.6)    | 356 (1.1)    | 564 (2.2)    | 565 (1.3)    | 440 (1.2)    | 67 (1.1)     | 1435 (3.0)   | 624 (1.6)    |
| SBP, mmHg: mean (SD)                   | 131.5 (19.7)  | 139.6 (20.5) | 125 (17.2)   | 129.2 (17.7) | 129.8 (20.6) | 129.5 (18.1) | 126.2 (18.9) | 128.2 (18.6) | 134 (20)     | 131.2 (19.2) |
| <b>Diastolic Blood Pressure, N (%)</b> |               |              |              |              |              |              |              |              |              |              |
| < 80 mmHg                              | 132590 (43.1) | 20292 (36.9) | 12372 (64.5) | 12577 (38.1) | 10656 (41.2) | 15892 (36.9) | 21394 (58.6) | 3192 (50.9)  | 17028 (35.3) | 19187 (47.8) |
| 80-84 mmHg                             | 64872 (21.1)  | 11599 (21.1) | 3031 (15.8)  | 6293 (19.0)  | 6189 (23.9)  | 11721 (27.2) | 6246 (17.1)  | 1123 (17.9)  | 10667 (22.1) | 8003 (19.9)  |
| 85-89 mmHg                             | 41500 (13.5)  | 8863 (16.1)  | 1901 (9.9)   | 5522 (16.7)  | 2738 (10.6)  | 5779 (13.4)  | 4081 (11.2)  | 818 (13.0)   | 6853 (14.2)  | 4945 (12.3)  |
| 90-99 mmHg                             | 51196 (16.7)  | 10521 (19.1) | 1544 (8.0)   | 6362 (19.3)  | 4784 (18.5)  | 7440 (17.3)  | 3685 (10.1)  | 828 (13.2)   | 10117 (21.0) | 5915 (14.7)  |
| 100-109 mmHg                           | 13896 (4.5)   | 2955 (5.4)   | 269 (1.4)    | 1874 (5.7)   | 1204 (4.7)   | 1822 (4.2)   | 916 (2.5)    | 222 (3.5)    | 2952 (6.1)   | 1682 (4.2)   |
| >= 110 mmHg                            | 3264 (1.1)    | 731 (1.3)    | 78 (0.4)     | 420 (1.3)    | 283 (1.1)    | 455 (1.1)    | 195 (0.5)    | 90 (1.4)     | 567 (1.2)    | 445 (1.1)    |
| DBP, mmHg: mean (SD)                   | 81.1 (10.9)   | 83.1 (10.6)  | 76.7 (10)    | 83.5 (10.6)  | 80.5 (10.6)  | 81.7 (10.1)  | 77.8 (10.7)  | 80.3 (11.7)  | 82.2 (10.9)  | 80.1 (11.5)  |

|                                                  | Total         | Denmark      | France       | Germany      | Greece       | Italy        | Netherlands  | Spain       | Sweden       | UK           |
|--------------------------------------------------|---------------|--------------|--------------|--------------|--------------|--------------|--------------|-------------|--------------|--------------|
| <b>Mean Blood Pressure, N (%)</b>                |               |              |              |              |              |              |              |             |              |              |
| 50.0-88.3 mmHg                                   | 76991 (25.1)  | 8532 (15.5)  | 7505 (39.1)  | 7052 (21.3)  | 7108 (27.5)  | 9839 (22.8)  | 13546 (37.1) | 1879 (30.0) | 10381 (21.5) | 11149 (27.7) |
| 88.5-96.6 mmHg                                   | 77727 (25.3)  | 11503 (20.9) | 5146 (26.8)  | 8266 (25.0)  | 7003 (27.1)  | 12659 (29.4) | 9409 (25.8)  | 1525 (24.3) | 12282 (25.5) | 9934 (24.7)  |
| 96.8-105.5 mmHg                                  | 76327 (24.8)  | 15558 (28.3) | 4230 (22.0)  | 9455 (28.6)  | 5777 (22.3)  | 11080 (25.7) | 7862 (21.5)  | 1594 (25.4) | 11192 (23.2) | 9579 (23.8)  |
| 105.6-216.6 mmHg                                 | 76273 (24.8)  | 19368 (35.2) | 2314 (12.1)  | 8275 (25.0)  | 5966 (23.1)  | 9531 (22.1)  | 5700 (15.6)  | 1275 (20.3) | 14329 (29.7) | 9515 (23.7)  |
| MBP, mmHg: mean (SD)                             | 97.9 (12.9)   | 101.9 (12.9) | 92.8 (11.4)  | 98.7 (12.2)  | 96.9 (12.8)  | 97.7 (11.9)  | 94 (12.5)    | 96.2 (13.1) | 99.5 (13)    | 97.2 (13.3)  |
| <b>Hypertension (yes/no), N (%)</b>              |               |              |              |              |              |              |              |             |              |              |
| No hypertension                                  | 174179 (56.7) | 25551 (46.5) | 13495 (70.3) | 17799 (53.9) | 14383 (55.6) | 26131 (60.6) | 23286 (63.8) | 3740 (59.6) | 25183 (52.3) | 24611 (61.3) |
| Hypertension                                     | 133139 (43.3) | 29410 (53.5) | 5700 (29.7)  | 15249 (46.1) | 11471 (44.4) | 16978 (39.4) | 13231 (36.2) | 2533 (40.4) | 23001 (47.7) | 15566 (38.7) |
| <b>Treatment of hypertension (yes/no), N (%)</b> |               |              |              |              |              |              |              |             |              |              |
| Untreated hypertension                           | 73714 (66.6)  | 18458 (73.3) | 3980 (74.2)  | 7681 (50.5)  | 6179 (54.3)  | 11495 (68.5) | 8603 (67.9)  | 1661 (66.0) | 12992 (68.6) | 2665 (100.0) |
| Treated hypertension                             | 37017 (33.4)  | 6733 (26.7)  | 1382 (25.8)  | 7525 (49.5)  | 5204 (45.7)  | 5292 (31.5)  | 4070 (32.1)  | 854 (34.0)  | 5957 (31.4)  | 0 (0.0)      |

**EPIC** - European Prospective Investigation into Cancer and Nutrition; **N** - number of individuals; **(%)** - percentage from total number per country; **SD** - standard deviation; **DBP** – diastolic blood pressure; **SBP** – systolic blood pressure; **MBP (Mean Blood Pressure)**: calculated as  $(1/3)*SBP+(2/3)*DBP$ ; **#** - person years of follow-up in the study from the date of blood pressure measurement; **Hypertension**: defined as  $SBP \geq 140$  mmHg, or  $DBP \geq 90$  mmHg, or self-reported; **Treatment of hypertension**: summary of self-reported antihypertensive treatment (yes/no) for individuals with hypertension as defined above; The order of the main cancer locations corresponds to Figure 2 (by body system); \* - specific cancer location or morphology (cancer morphologies and locations are defined in Supplementary Table 1); **AC** - adenocarcinoma; **SCC** - squamous cell carcinoma; **SmallCC** - small cell carcinoma; **HCC** - hepatocellular carcinoma.



Supplementary Table 4 Baseline demographic, lifestyle and reproductive characteristics by blood pressure category

| Characteristics                                | Total         | Systolic Blood Pressure |               |               |               |               |               |
|------------------------------------------------|---------------|-------------------------|---------------|---------------|---------------|---------------|---------------|
|                                                |               | < 120 mmHg              | 120-129 mmHg  | 130-139 mmHg  | 140-159 mmHg  | 160-179 mmHg  | ≥ 180 mmHg    |
| Cohort size: N                                 | 307318        | 86141                   | 66446         | 57482         | 68235         | 22656         | 6358          |
| Female: N (%)                                  | 194727 (63.4) | 65461 (76.0)            | 40944 (61.6)  | 33415 (58.1)  | 38168 (55.9)  | 13066 (57.7)  | 3673 (57.8)   |
| Age at recruitment, years: mean (SD)           | 52.5 (9.9)    | 47.3 (9.8)              | 50.9 (9.4)    | 53.6 (8.9)    | 56.8 (8.0)    | 59.5 (7.3)    | 60.5 (7.1)    |
| Body Mass Index, kg/m <sup>2</sup> : mean (SD) | 25.8 (4.2)    | 24.1 (3.6)              | 25.5 (3.9)    | 26.3 (4.1)    | 27.0 (4.4)    | 27.6 (4.6)    | 27.9 (4.8)    |
| Alcohol intake, g/day: mean (SD)               | 12.4 (17.1)   | 9.7 (13.5)              | 11.9 (15.9)   | 13.1 (17.6)   | 14.5 (19.5)   | 14.5 (20.3)   | 15.8 (22.3)   |
| Fruit consumption, g/day: mean (SD)            | 230.6 (176.7) | 237.9 (185.0)           | 233.0 (179.0) | 229.4 (176.2) | 225.0 (169.2) | 220.2 (163.3) | 214.6 (162.4) |
| Vegetable consumption, g/day: mean (SD)        | 200.9 (145.4) | 209.0 (155.5)           | 201.4 (148.8) | 197.2 (138.8) | 197.1 (138.0) | 193.6 (135.5) | 188.2 (134.1) |
| Red meat consumption, g/day: mean (SD)         | 48.2 (36.3)   | 44.0 (34.6)             | 47.3 (36.0)   | 49.3 (36.2)   | 51.7 (37.6)   | 52.1 (37.3)   | 53.5 (37.5)   |
| <b>Diabetes: N (%)</b>                         |               |                         |               |               |               |               |               |
| Self-reported diabetes                         | 8588 (2.8)    | 1034 (1.2)              | 1365 (2.1)    | 1582 (2.8)    | 2837 (4.2)    | 1317 (5.8)    | 453 (7.1)     |
| Missing information                            | 30147 (9.8)   | 5934 (6.9)              | 6280 (9.5)    | 6226 (10.8)   | 8421 (12.3)   | 2612 (11.5)   | 674 (10.6)    |
| <b>Smoking status: N (%)</b>                   |               |                         |               |               |               |               |               |
| Never smoker                                   | 141931 (46.2) | 39958 (46.4)            | 30980 (46.6)  | 26660 (46.4)  | 31153 (45.7)  | 10419 (46.0)  | 2761 (43.4)   |
| Former smoker                                  | 86314 (28.1)  | 21204 (24.6)            | 18180 (27.4)  | 16751 (29.1)  | 21025 (30.8)  | 7147 (31.5)   | 2007 (31.6)   |
| Current smoker (≤ 20 pack-years)               | 32226 (10.5)  | 12765 (14.8)            | 7333 (11.0)   | 5130 (8.9)    | 5093 (7.5)    | 1457 (6.4)    | 448 (7.0)     |
| Current smoker (> 20 pack-years)               | 34907 (11.4)  | 8959 (10.4)             | 7386 (11.1)   | 6629 (11.5)   | 8221 (12.0)   | 2787 (12.3)   | 925 (14.5)    |
| Missing information                            | 11940 (3.9)   | 3255 (3.8)              | 2567 (3.9)    | 2312 (4.0)    | 2743 (4.0)    | 846 (3.7)     | 217 (3.4)     |
| <b>Physical activity: N (%)</b>                |               |                         |               |               |               |               |               |
| Inactive                                       | 67194 (21.9)  | 15201 (17.6)            | 13228 (19.9)  | 12770 (22.2)  | 17521 (25.7)  | 6542 (28.9)   | 1932 (30.4)   |
| Moderately inactive                            | 100295 (32.6) | 28544 (33.1)            | 21835 (32.9)  | 18840 (32.8)  | 21753 (31.9)  | 7291 (32.2)   | 2032 (32.0)   |
| Moderately active                              | 70977 (23.1)  | 21409 (24.9)            | 15862 (23.9)  | 13326 (23.2)  | 14685 (21.5)  | 4467 (19.7)   | 1228 (19.3)   |
| Active                                         | 62152 (20.2)  | 17801 (20.7)            | 14093 (21.2)  | 11555 (20.1)  | 13446 (19.7)  | 4123 (18.2)   | 1134 (17.8)   |
| Missing information                            | 6700 (2.2)    | 3186 (3.7)              | 1428 (2.1)    | 991 (1.7)     | 830 (1.2)     | 233 (1.0)     | 32 (0.5)      |
| <b>Education: N (%)</b>                        |               |                         |               |               |               |               |               |
| None                                           | 9377 (3.1)    | 1661 (1.9)              | 1649 (2.5)    | 1786 (3.1)    | 2790 (4.1)    | 1164 (5.1)    | 327 (5.1)     |
| Primary school completed                       | 90254 (29.4)  | 18049 (21.0)            | 17950 (27.0)  | 17702 (30.8)  | 24700 (36.2)  | 9155 (40.4)   | 2698 (42.4)   |
| Technical/professional school                  | 77398 (25.2)  | 20712 (24.0)            | 16789 (25.3)  | 14704 (25.6)  | 17822 (26.1)  | 5759 (25.4)   | 1612 (25.4)   |
| Secondary school                               | 53830 (17.5)  | 19078 (22.1)            | 12696 (19.1)  | 9691 (16.9)   | 9148 (13.4)   | 2546 (11.2)   | 671 (10.6)    |
| Longer education (incl. University degree)     | 67606 (22.0)  | 24418 (28.3)            | 15466 (23.3)  | 11838 (20.6)  | 11689 (17.1)  | 3335 (14.7)   | 860 (13.5)    |
| Missing information                            | 8853 (2.9)    | 2223 (2.6)              | 1896 (2.9)    | 1761 (3.1)    | 2086 (3.1)    | 697 (3.1)     | 190 (3.0)     |
| <b>Antihypertensive treatment: N (%)</b>       |               |                         |               |               |               |               |               |
| No treatment                                   | 227336 (74.0) | 75558 (87.7)            | 53631 (80.7)  | 42212 (73.4)  | 42214 (61.9)  | 11150 (49.2)  | 2571 (40.4)   |
| Treated                                        | 37017 (12.0)  | 2065 (2.4)              | 4241 (6.4)    | 6737 (11.7)   | 13884 (20.3)  | 7462 (32.9)   | 2628 (41.3)   |
| Missing information                            | 42965 (14.0)  | 8518 (9.9)              | 8574 (12.9)   | 8533 (14.8)   | 12137 (17.8)  | 4044 (17.8)   | 1159 (18.2)   |

Continues on next page

| <b>Reproductive factors (women)</b>            | <b>Total</b>  | <b>&lt; 120 mmHg</b> | <b>120-129 mmHg</b> | <b>130-139 mmHg</b> | <b>140-159 mmHg</b> | <b>160-179 mmHg</b> | <b>≥ 180 mmHg</b> |
|------------------------------------------------|---------------|----------------------|---------------------|---------------------|---------------------|---------------------|-------------------|
| <b>Age at first menstrual period: N (%)</b>    |               |                      |                     |                     |                     |                     |                   |
| < 12 years                                     | 27085 (13.9)  | 9595 (14.7)          | 5733 (14.0)         | 4716 (14.1)         | 5074 (13.3)         | 1514 (11.6)         | 453 (12.3)        |
| ≥ 12 and < 15 years                            | 125828 (64.6) | 42585 (65.1)         | 26680 (65.2)        | 21625 (64.7)        | 24337 (63.8)        | 8287 (63.4)         | 2314 (63.0)       |
| ≥ 15 years                                     | 32391 (16.6)  | 9329 (14.3)          | 6418 (15.7)         | 5762 (17.2)         | 7319 (19.2)         | 2794 (21.4)         | 769 (20.9)        |
| Missing information                            | 9423 ( 4.8)   | 3952 (6.0)           | 2113 (5.2)          | 1312 (3.9)          | 1438 (3.8)          | 471 (3.6)           | 137 (3.7)         |
| <b>Age at first full term pregnancy: N (%)</b> |               |                      |                     |                     |                     |                     |                   |
| ≤ 21 years                                     | 36839 (18.9)  | 11093 (16.9)         | 7757 (18.9)         | 6509 (19.5)         | 7915 (20.7)         | 2769 (21.2)         | 796 (21.7)        |
| > 21 and ≤ 30 years                            | 106230 (54.6) | 33698 (51.5)         | 22395 (54.7)        | 19006 (56.9)        | 21669 (56.8)        | 7421 (56.8)         | 2041 (55.6)       |
| > 30 years                                     | 15709 ( 8.1)  | 5588 (8.5)           | 3297 (8.1)          | 2535 (7.6)          | 2964 (7.8)          | 1035 (7.9)          | 290 (7.9)         |
| Missing information                            | 35949 (18.5)  | 15082 (23.0)         | 7495 (18.3)         | 5365 (16.1)         | 5620 (14.7)         | 1841 (14.1)         | 546 (14.9)        |
| <b>Number of full-term pregnancies: N (%)</b>  |               |                      |                     |                     |                     |                     |                   |
| None                                           | 25571 (13.1)  | 10307 (15.7)         | 5226 (12.8)         | 3944 (11.8)         | 4227 (11.1)         | 1438 (11.0)         | 429 (11.7)        |
| One                                            | 28796 (14.8)  | 9326 (14.2)          | 6139 (15.0)         | 5018 (15.0)         | 5771 (15.1)         | 1977 (15.1)         | 565 (15.4)        |
| Two                                            | 75357 (38.7)  | 24211 (37.0)         | 16178 (39.5)        | 13358 (40.0)        | 15223 (39.9)        | 5037 (38.6)         | 1350 (36.8)       |
| Three                                          | 33031 (17.0)  | 9387 (14.3)          | 6941 (17.0)         | 6026 (18.0)         | 7340 (19.2)         | 2624 (20.1)         | 713 (19.4)        |
| Four or more                                   | 14897 ( 7.7)  | 3448 (5.3)           | 2883 (7.0)          | 2861 (8.6)          | 3732 (9.8)          | 1484 (11.4)         | 489 (13.3)        |
| Missing information                            | 17075 ( 8.8)  | 8782 (13.4)          | 3577 (8.7)          | 2208 (6.6)          | 1875 (4.9)          | 506 (3.9)           | 127 (3.5)         |
| <b>Menopausal status: N (%)</b>                |               |                      |                     |                     |                     |                     |                   |
| Pre-menopausal                                 | 58190 (29.9)  | 32401 (49.5)         | 13167 (32.2)        | 7060 (21.1)         | 4551 (11.9)         | 825 (6.3)           | 186 (5.1)         |
| Post-menopausal                                | 96806 (49.7)  | 20155 (30.8)         | 18714 (45.7)        | 18853 (56.4)        | 26087 (68.3)        | 10027 (76.7)        | 2970 (80.9)       |
| Peri-menopausal or unknown                     | 33371 (17.1)  | 11425 (17.5)         | 7789 (19.0)         | 6270 (18.8)         | 5912 (15.5)         | 1607 (12.3)         | 368 (10.0)        |
| Surgical post-menopausal                       | 6360 ( 3.3)   | 1480 (2.3)           | 1274 (3.1)          | 1232 (3.7)          | 1618 (4.2)          | 607 (4.6)           | 149 (4.1)         |
| <b>Age at menopause: N (%)</b>                 |               |                      |                     |                     |                     |                     |                   |
| < 40 years                                     | 4301 ( 2.2)   | 950 (1.5)            | 853 (2.1)           | 821 (2.5)           | 1128 (3.0)          | 436 (3.3)           | 113 (3.1)         |
| ≥ 40 and ≤ 46 years                            | 18912 ( 9.7)  | 4218 (6.4)           | 3594 (8.8)          | 3621 (10.8)         | 5030 (13.2)         | 1893 (14.5)         | 556 (15.1)        |
| > 46 and ≤ 50 years                            | 31996 (16.4)  | 6636 (10.1)          | 6298 (15.4)         | 6257 (18.7)         | 8493 (22.3)         | 3299 (25.2)         | 1013 (27.6)       |
| > 50 and ≤ 56 years                            | 29427 (15.1)  | 5220 (8.0)           | 5427 (13.3)         | 5940 (17.8)         | 8462 (22.2)         | 3415 (26.1)         | 963 (26.2)        |
| > 56 years                                     | 1997 ( 1.0)   | 267 (0.4)            | 326 (0.8)           | 364 (1.1)           | 652 (1.7)           | 287 (2.2)           | 101 (2.7)         |
| Missing information or not applicable          | 108094 (55.5) | 48170 (73.6)         | 24446 (59.7)        | 16412 (49.1)        | 14403 (37.7)        | 3736 (28.6)         | 927 (25.2)        |
| <b>Oral contraceptive use: N (%)</b>           |               |                      |                     |                     |                     |                     |                   |
| Never                                          | 82568 (42.4)  | 20931 (32.0)         | 16050 (39.2)        | 15231 (45.6)        | 20282 (53.1)        | 7760 (59.4)         | 2314 (63.0)       |
| Former                                         | 91622 (47.1)  | 34372 (52.5)         | 20156 (49.2)        | 15415 (46.1)        | 15725 (41.2)        | 4735 (36.2)         | 1219 (33.2)       |
| Current                                        | 10050 ( 5.2)  | 5228 (8.0)           | 2345 (5.7)          | 1353 (4.0)          | 879 (2.3)           | 207 (1.6)           | 38 (1.0)          |
| Missing information                            | 10487 ( 5.4)  | 4930 (7.5)           | 2393 (5.8)          | 1416 (4.2)          | 1282 (3.4)          | 364 (2.8)           | 102 (2.8)         |
| <b>Hormone replacement therapy: N (%)</b>      |               |                      |                     |                     |                     |                     |                   |
| Never                                          | 129049 (66.3) | 46653 (71.3)         | 26815 (65.5)        | 21277 (63.7)        | 23675 (62.0)        | 8205 (62.8)         | 2424 (66.0)       |
| Former                                         | 16259 ( 8.3)  | 4161 (6.4)           | 3354 (8.2)          | 3188 (9.5)          | 3917 (10.3)         | 1310 (10.0)         | 329 (9.0)         |
| Current                                        | 30133 (15.5)  | 8768 (13.4)          | 6600 (16.1)         | 5701 (17.1)         | 6533 (17.1)         | 2014 (15.4)         | 517 (14.1)        |
| Missing information                            | 19286 ( 9.9)  | 5879 (9.0)           | 4175 (10.2)         | 3249 (9.7)          | 4043 (10.6)         | 1537 (11.8)         | 403 (11.0)        |

Continues on next page

| Characteristics                                | Total         | Diastolic Blood Pressure |               |               |               |               |               |
|------------------------------------------------|---------------|--------------------------|---------------|---------------|---------------|---------------|---------------|
|                                                |               | < 80 mmHg                | 80-84 mmHg    | 85-89 mmHg    | 90-99 mmHg    | 100-109 mmHg  | ≥ 110 mmHg    |
| Cohort size: N                                 | 307318        | 132590                   | 64872         | 41500         | 51196         | 13896         | 3264          |
| Female: N (%)                                  | 194727 (63.4) | 96352 (72.7)             | 39059 (60.2)  | 23956 (57.7)  | 27199 (53.1)  | 6720 (48.4)   | 1441 (44.1)   |
| Age at recruitment, years: mean (SD)           | 52.5 (9.9)    | 50.2 (10.5)              | 52.9 (9.6)    | 54.2 (8.7)    | 55.4 (8.4)    | 56.4 (8.0)    | 56.6 (7.9)    |
| Body Mass Index, kg/m <sup>2</sup> : mean (SD) | 25.8 (4.2)    | 24.6 (3.8)               | 26.0 (4.1)    | 26.6 (4.2)    | 27.3 (4.4)    | 28.1 (4.7)    | 28.8 (5.1)    |
| Alcohol intake, g/day: mean (SD)               | 12.4 (17.1)   | 10.4 (14.3)              | 12.7 (17.1)   | 13.6 (18.2)   | 14.8 (19.9)   | 16.2 (22.0)   | 17.2 (23.5)   |
| Fruit consumption, g/day: mean (SD)            | 230.6 (176.7) | 234.0 (178.4)            | 238.6 (184.6) | 222.9 (170.7) | 223.5 (169.3) | 214.8 (166.0) | 211.6 (163.5) |
| Vegetable consumption, g/day: mean (SD)        | 200.9 (145.4) | 206.9 (149.3)            | 202.5 (146.6) | 191.8 (138.5) | 194.8 (140.7) | 189.0 (138.7) | 190.4 (138.4) |
| Red meat consumption, g/day: mean (SD)         | 48.2 (36.3)   | 46.1 (35.5)              | 48.3 (35.9)   | 50.1 (36.8)   | 50.6 (37.4)   | 51.9 (37.9)   | 53.9 (39.4)   |
| <b>Diabetes: N (%)</b>                         |               |                          |               |               |               |               |               |
| Self-reported diabetes                         | 8588 (2.8)    | 2794 (2.1)               | 1897 (2.9)    | 1280 (3.1)    | 1920 (3.8)    | 539 (3.9)     | 158 (4.8)     |
| Missing information                            | 30147 (9.8)   | 11973 (9)                | 5761 (8.9)    | 4547 (11)     | 5692 (11.1)   | 1738 (12.5)   | 436 (13.4)    |
| <b>Smoking status: N (%)</b>                   |               |                          |               |               |               |               |               |
| Never smoker                                   | 141931 (46.2) | 62146 (46.9)             | 30071 (46.4)  | 19076 (46.0)  | 23182 (45.3)  | 6030 (43.4)   | 1426 (43.7)   |
| Former smoker                                  | 86314 (28.1)  | 34090 (25.7)             | 18378 (28.3)  | 12433 (30.0)  | 15817 (30.9)  | 4547 (32.7)   | 1049 (32.1)   |
| Current smoker (≤ 20 pack-years)               | 32226 (10.5)  | 16753 (12.6)             | 6505 (10.0)   | 3576 (8.6)    | 4080 (8.0)    | 1066 (7.7)    | 246 (7.5)     |
| Current smoker (> 20 pack-years)               | 34907 (11.4)  | 14418 (10.9)             | 7493 (11.6)   | 4820 (11.6)   | 6068 (11.9)   | 1704 (12.3)   | 404 (12.4)    |
| Missing information                            | 11940 (3.9)   | 5183 (3.9)               | 2425 (3.7)    | 1595 (3.8)    | 2049 (4.0)    | 549 (4.0)     | 139 (4.3)     |
| <b>Physical activity: N (%)</b>                |               |                          |               |               |               |               |               |
| Inactive                                       | 67194 (21.9)  | 25354 (19.1)             | 14642 (22.6)  | 9415 (22.7)   | 12952 (25.3)  | 3859 (27.8)   | 972 (29.8)    |
| Moderately inactive                            | 100295 (32.6) | 43034 (32.5)             | 21287 (32.8)  | 13573 (32.7)  | 16860 (32.9)  | 4489 (32.3)   | 1052 (32.2)   |
| Moderately active                              | 70977 (23.1)  | 32177 (24.3)             | 14749 (22.7)  | 9440 (22.7)   | 11100 (21.7)  | 2854 (20.5)   | 657 (20.1)    |
| Active                                         | 62152 (20.2)  | 28031 (21.1)             | 13074 (20.2)  | 8365 (20.2)   | 9619 (18.8)   | 2519 (18.1)   | 544 (16.7)    |
| Missing information                            | 6700 (2.2)    | 3994 (3.0)               | 1120 (1.7)    | 707 (1.7)     | 665 (1.3)     | 175 (1.3)     | 39 (1.2)      |
| <b>Education: N (%)</b>                        |               |                          |               |               |               |               |               |
| None                                           | 9377 (3.1)    | 3182 (2.4)               | 2255 (3.5)    | 1123 (2.7)    | 2100 (4.1)    | 560 (4.0)     | 157 (4.8)     |
| Primary school completed                       | 90254 (29.4)  | 31658 (23.9)             | 20359 (31.4)  | 13613 (32.8)  | 18220 (35.6)  | 5172 (37.2)   | 1232 (37.7)   |
| Technical/professional school                  | 77398 (25.2)  | 32758 (24.7)             | 15956 (24.6)  | 11061 (26.7)  | 13259 (25.9)  | 3588 (25.8)   | 776 (23.8)    |
| Secondary school                               | 53830 (17.5)  | 27531 (20.8)             | 11073 (17.1)  | 6263 (15.1)   | 6836 (13.4)   | 1719 (12.4)   | 408 (12.5)    |
| Longer education (incl. University degree)     | 67606 (22.0)  | 33387 (25.2)             | 13330 (20.5)  | 8324 (20.1)   | 9457 (18.5)   | 2518 (18.1)   | 590 (18.1)    |
| Missing information                            | 8853 (2.9)    | 4074 (3.1)               | 1899 (2.9)    | 1116 (2.7)    | 1324 (2.6)    | 339 (2.4)     | 101 (3.1)     |
| <b>Antihypertensive treatment: N (%)</b>       |               |                          |               |               |               |               |               |
| No treatment                                   | 227336 (74.0) | 110105 (83.0)            | 50113 (77.2)  | 28744 (69.3)  | 30577 (59.7)  | 6477 (46.6)   | 1320 (40.4)   |
| Treated                                        | 37017 (12.0)  | 5988 (4.5)               | 6453 (9.9)    | 6278 (15.1)   | 12212 (23.9)  | 4847 (34.9)   | 1239 (38.0)   |
| Missing information                            | 42965 (14.0)  | 16497 (12.4)             | 8306 (12.8)   | 6478 (15.6)   | 8407 (16.4)   | 2572 (18.5)   | 705 (21.6)    |

Continues on next page

| <b>Reproductive factors (women)</b>            | <b>Total</b>  | <b>&lt; 80 mmHg</b> | <b>80-84 mmHg</b> | <b>85-89 mmHg</b> | <b>90-99 mmHg</b> | <b>100-109 mmHg</b> | <b>≥ 110 mmHg</b> |
|------------------------------------------------|---------------|---------------------|-------------------|-------------------|-------------------|---------------------|-------------------|
| <b>Age at first menstrual period: N (%)</b>    |               |                     |                   |                   |                   |                     |                   |
| < 12 years                                     | 27085 (13.9)  | 13479 (14.0)        | 5358 (13.7)       | 3341 (13.9)       | 3709 (13.6)       | 973 (14.5)          | 225 (15.6)        |
| ≥ 12 and < 15 years                            | 125828 (64.6) | 62216 (64.6)        | 25302 (64.8)      | 15521 (64.8)      | 17646 (64.9)      | 4225 (62.9)         | 918 (63.7)        |
| ≥ 15 years                                     | 32391 (16.6)  | 15202 (15.8)        | 6700 (17.2)       | 4100 (17.1)       | 4843 (17.8)       | 1285 (19.1)         | 261 (18.1)        |
| Missing information                            | 9423 (4.8)    | 5455 (5.7)          | 1699 (4.3)        | 994 (4.1)         | 1001 (3.7)        | 237 (3.5)           | 37 (2.6)          |
| <b>Age at first full term pregnancy: N (%)</b> |               |                     |                   |                   |                   |                     |                   |
| ≤ 21 years                                     | 36839 (18.9)  | 16461 (17.1)        | 7737 (19.8)       | 4927 (20.6)       | 5914 (21.7)       | 1486 (22.1)         | 314 (21.8)        |
| > 21 and ≤ 30 years                            | 106230 (54.6) | 51245 (53.2)        | 21671 (55.5)      | 13514 (56.4)      | 15248 (56.1)      | 3752 (55.8)         | 800 (55.5)        |
| > 30 years                                     | 15709 (8.1)   | 8160 (8.5)          | 3046 (7.8)        | 1798 (7.5)        | 2053 (7.5)        | 536 (8.0)           | 116 (8.0)         |
| Missing information                            | 35949 (18.5)  | 20486 (21.3)        | 6605 (16.9)       | 3717 (15.5)       | 3984 (14.6)       | 946 (14.1)          | 211 (14.6)        |
| <b>Number of full-term pregnancies: N (%)</b>  |               |                     |                   |                   |                   |                     |                   |
| None                                           | 25571 (13.1)  | 14179 (14.7)        | 4822 (12.3)       | 2708 (11.3)       | 2966 (10.9)       | 733 (10.9)          | 163 (11.3)        |
| One                                            | 28796 (14.8)  | 13454 (14.0)        | 5985 (15.3)       | 3708 (15.5)       | 4341 (16.0)       | 1089 (16.2)         | 219 (15.2)        |
| Two                                            | 75357 (38.7)  | 36127 (37.5)        | 15607 (40.0)      | 9564 (39.9)       | 10861 (39.9)      | 2652 (39.5)         | 546 (37.9)        |
| Three                                          | 33031 (17.0)  | 15360 (15.9)        | 6857 (17.6)       | 4320 (18.0)       | 5001 (18.4)       | 1213 (18.1)         | 280 (19.4)        |
| Four or more                                   | 14897 (7.7)   | 6462 (6.7)          | 3007 (7.7)        | 2045 (8.5)        | 2540 (9.3)        | 674 (10.0)          | 169 (11.7)        |
| Missing information                            | 17075 (8.8)   | 10770 (11.2)        | 2781 (7.1)        | 1611 (6.7)        | 1490 (5.5)        | 359 (5.3)           | 64 (4.4)          |
| <b>Menopausal status: N (%)</b>                |               |                     |                   |                   |                   |                     |                   |
| Pre-menopausal                                 | 58190 (29.9)  | 37077 (38.5)        | 10288 (26.3)      | 5117 (21.4)       | 4575 (16.8)       | 930 (13.8)          | 203 (14.1)        |
| Post-menopausal                                | 96806 (49.7)  | 40368 (41.9)        | 20574 (52.7)      | 13749 (57.4)      | 16786 (61.7)      | 4392 (65.4)         | 937 (65.0)        |
| Peri-menopausal or unknown                     | 33371 (17.1)  | 16206 (16.8)        | 6856 (17.6)       | 4236 (17.7)       | 4731 (17.4)       | 1107 (16.5)         | 235 (16.3)        |
| Surgical post-menopausal                       | 6360 (3.3)    | 2701 (2.8)          | 1341 (3.4)        | 854 (3.6)         | 1107 (4.1)        | 291 (4.3)           | 66 (4.6)          |
| <b>Age at menopause: N (%)</b>                 |               |                     |                   |                   |                   |                     |                   |
| < 40 years                                     | 4301 (2.2)    | 1857 (1.9)          | 952 (2.4)         | 543 (2.3)         | 728 (2.7)         | 178 (2.6)           | 43 (3.0)          |
| ≥ 40 and ≤ 46 years                            | 18912 (9.7)   | 7770 (8.1)          | 4087 (10.5)       | 2617 (10.9)       | 3331 (12.2)       | 915 (13.6)          | 192 (13.3)        |
| > 46 and ≤ 50 years                            | 31996 (16.4)  | 12971 (13.5)        | 6878 (17.6)       | 4602 (19.2)       | 5723 (21.0)       | 1515 (22.5)         | 307 (21.3)        |
| > 50 and ≤ 56 years                            | 29427 (15.1)  | 11645 (12.1)        | 6290 (16.1)       | 4350 (18.2)       | 5449 (20.0)       | 1395 (20.8)         | 298 (20.7)        |
| > 56 years                                     | 1997 (1.0)    | 740 (0.8)           | 438 (1.1)         | 296 (1.2)         | 377 (1.4)         | 112 (1.7)           | 34 (2.4)          |
| Missing information or not applicable          | 108094 (55.5) | 61369 (63.7)        | 20414 (52.3)      | 11548 (48.2)      | 11591 (42.6)      | 2605 (38.8)         | 567 (39.3)        |
| <b>Oral contraceptive use: N (%)</b>           |               |                     |                   |                   |                   |                     |                   |
| Never                                          | 82568 (42.4)  | 35792 (37.1)        | 17637 (45.2)      | 10976 (45.8)      | 13796 (50.7)      | 3544 (52.7)         | 823 (57.1)        |
| Former                                         | 91622 (47.1)  | 48163 (50.0)        | 17767 (45.5)      | 10943 (45.7)      | 11444 (42.1)      | 2758 (41.0)         | 547 (38.0)        |
| Current                                        | 10050 (5.2)   | 5938 (6.2)          | 1853 (4.7)        | 1034 (4.3)        | 986 (3.6)         | 213 (3.2)           | 26 (1.8)          |
| Missing information                            | 10487 (5.4)   | 6459 (6.7)          | 1802 (4.6)        | 1003 (4.2)        | 973 (3.6)         | 205 (3.1)           | 45 (3.1)          |
| <b>Hormone replacement therapy: N (%)</b>      |               |                     |                   |                   |                   |                     |                   |
| Never                                          | 129049 (66.3) | 66219 (68.7)        | 25508 (65.3)      | 15027 (62.7)      | 17067 (62.7)      | 4232 (63.0)         | 996 (69.1)        |
| Former                                         | 16259 (8.3)   | 7398 (7.7)          | 3453 (8.8)        | 2211 (9.2)        | 2451 (9.0)        | 621 (9.2)           | 125 (8.7)         |
| Current                                        | 30133 (15.5)  | 14950 (15.5)        | 6120 (15.7)       | 3918 (16.4)       | 4049 (14.9)       | 919 (13.7)          | 177 (12.3)        |
| Missing information                            | 19286 (9.9)   | 7785 (8.1)          | 3978 (10.2)       | 2800 (11.7)       | 3632 (13.4)       | 948 (14.1)          | 143 (9.9)         |

N - number of individuals; (%) - percentage from total number in blood pressure category (for reproductive factors in women only); SD - standard deviation

**Supplementary Table 5 Summary of statistical analyses**

*see separate file: ST5\_HT\_CA\_EPIC.pdf or ST5\_HT\_CA\_EPIC.xls (same data, different format)*

**SUPPLEMENTARY FIGURES**

**Supplementary Figure 1 Forest plot of hazard ratios for sub-group analyses of continuous systolic and diastolic blood pressure**

Subgroup analyses by sex (A,B), body mass index (C,D), age at recruitment (E,F), smoking status (G,H), alcohol intake (I,J) and antihypertensive treatment (yes/no) (K,L).

*See separate file: SF1\_HT\_CA\_EPIC.pdf*

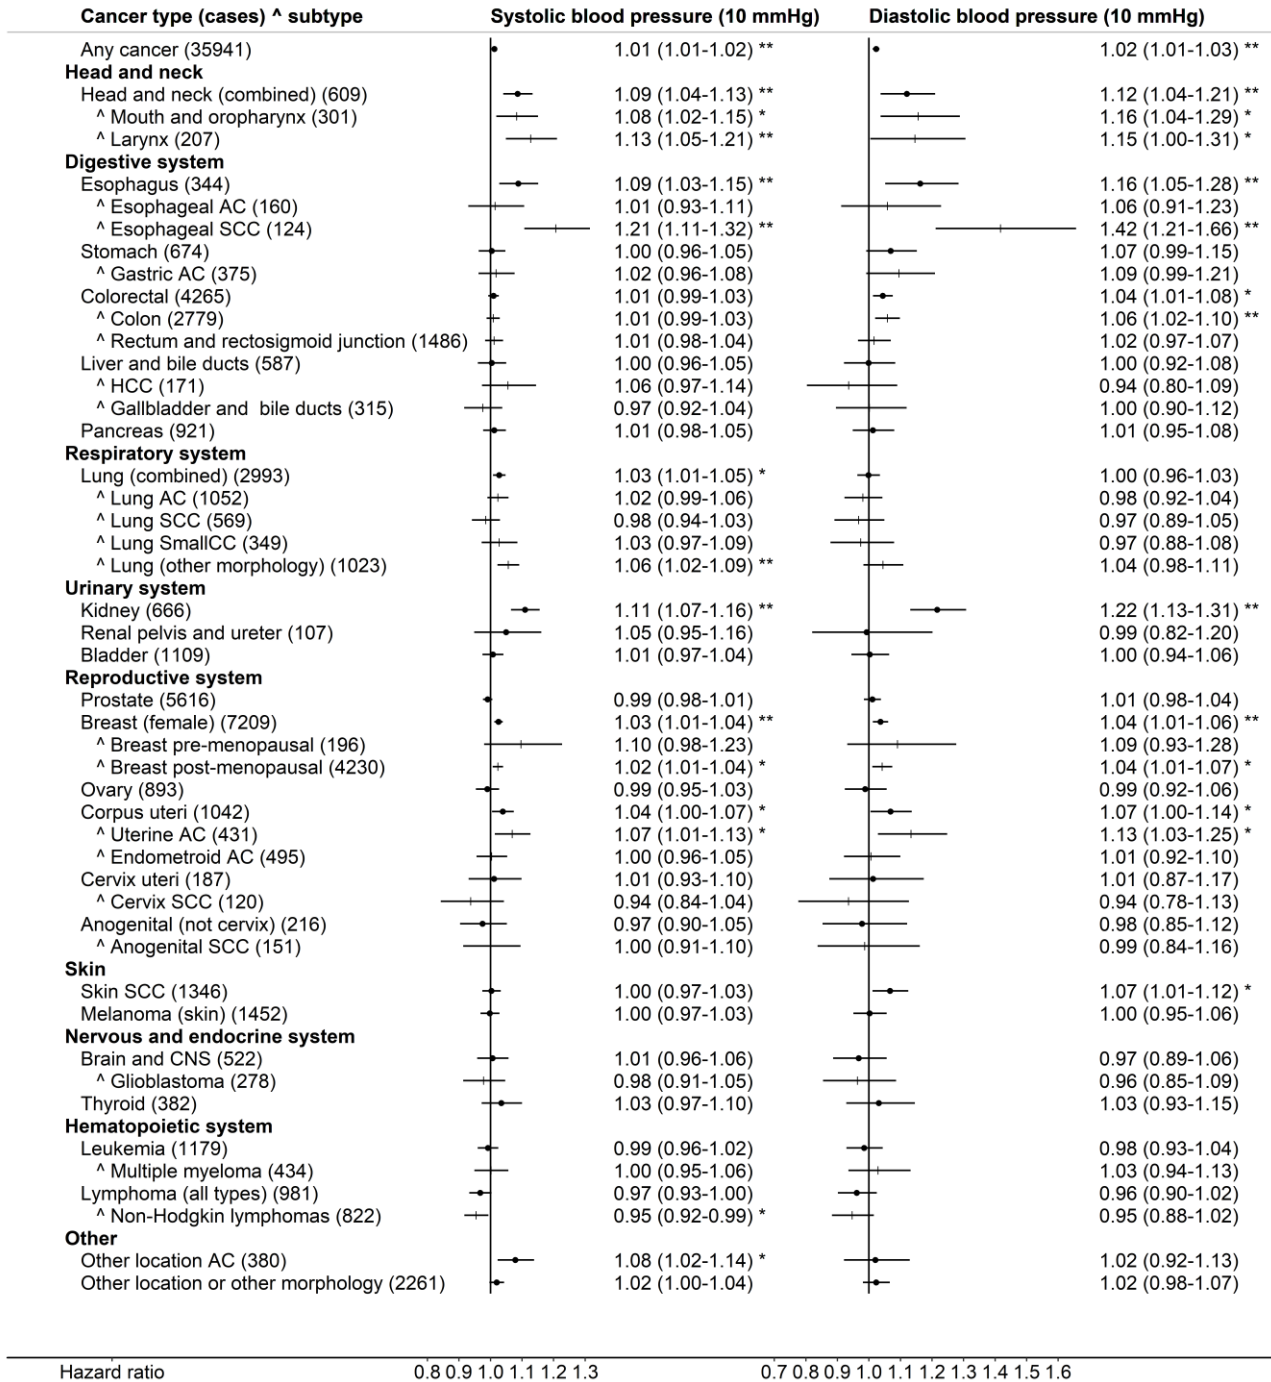

### Supplementary Figure 2 Sensitivity analysis – first two years of follow-up excluded

**Hazard ratios** – estimates (95% confidence intervals) (per 10mmHg higher blood pressure) derived from Cox proportional hazards models, stratified by study centre and age at recruitment (5-year categories) and adjusted for potential confounders and risk factors (Supplementary Table 2); **AC** – adenocarcinoma; **CNS** – central nervous system; **HCC** – hepatocellular carcinoma; **SCC** – squamous cell carcinoma; **SmallCC** – small cell carcinoma; **Vertical order** – determined by the hazard ratio estimates for systolic blood pressure (SBP) of the main anatomical locations (**dot** symbols), each followed by the relevant specific locations or morphologies marked with **^** (+ symbols) for the main analysis (as per Figure 2) (other locations, not included in those specified, are shown last).

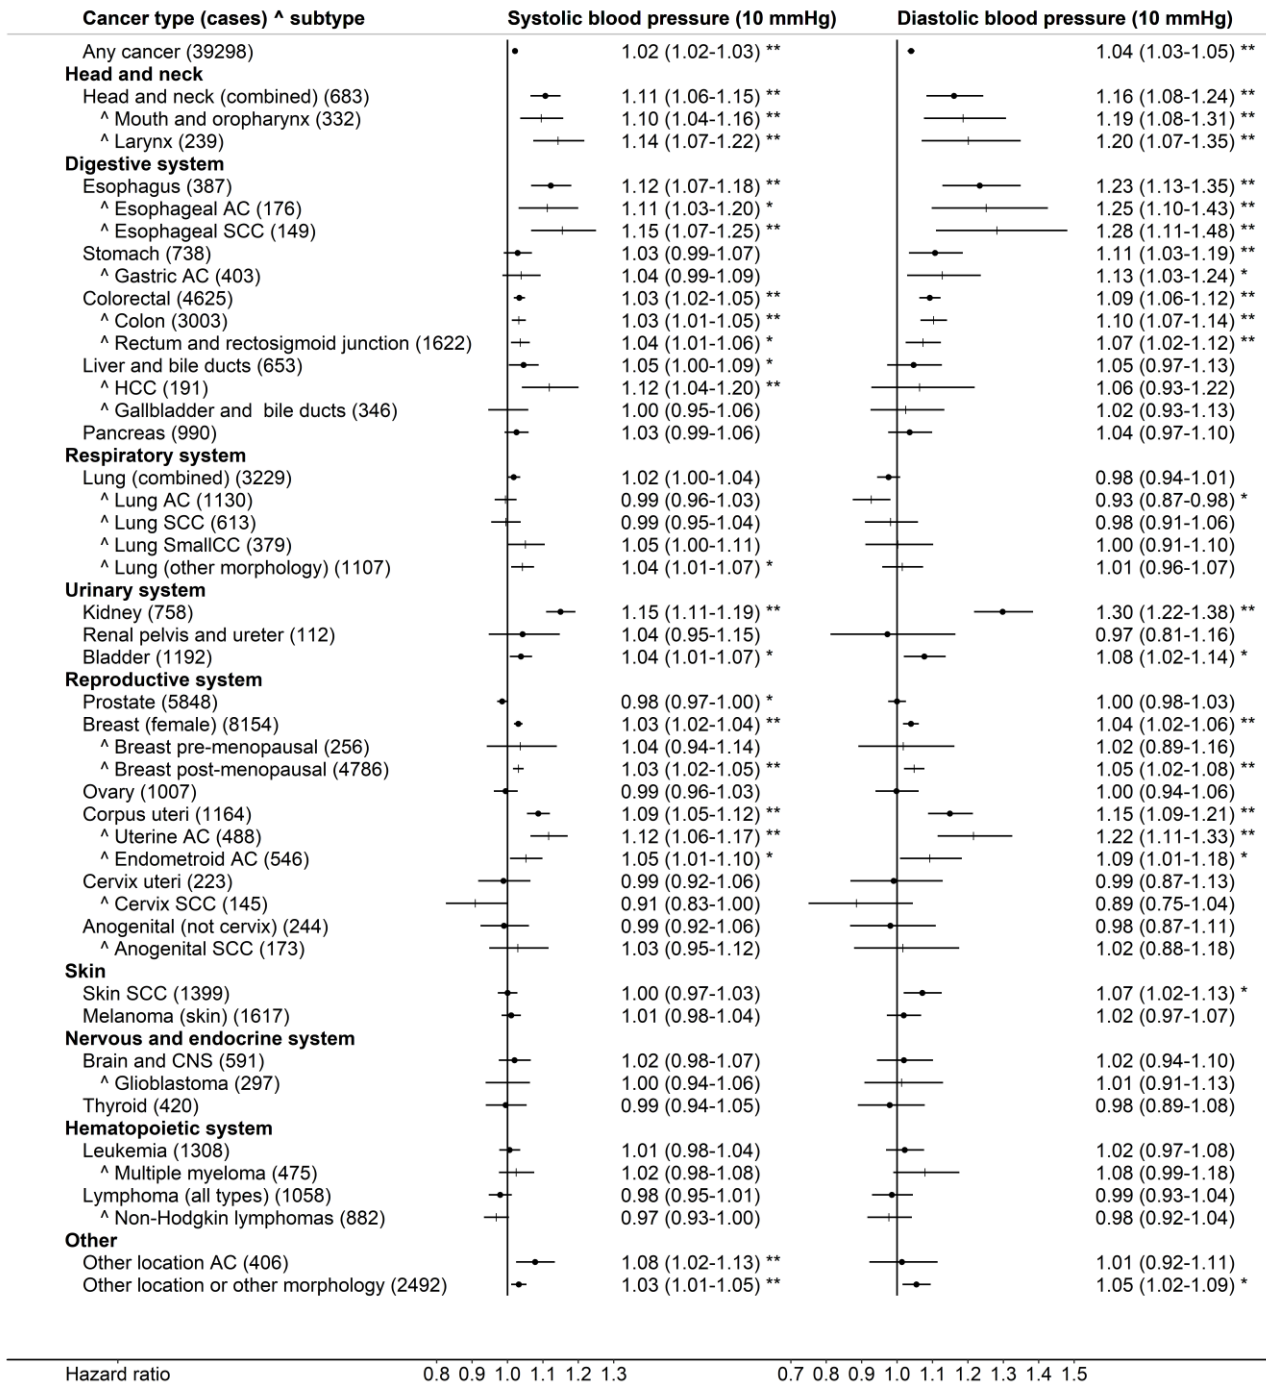

### Supplementary Figure 3 Sensitivity analysis – crude (unadjusted) hazard ratio estimates

**Hazard ratios** – unadjusted (crude) estimates (95% confidence intervals) (per 10mmHg higher blood pressure) derived from Cox proportional hazards models, stratified by study centre and age at recruitment (5-year categories); **AC** – adenocarcinoma; **CNS** – central nervous system; **HCC** – hepatocellular carcinoma; **SCC** – squamous cell carcinoma; **SmallCC** – small cell carcinoma; **Vertical order** – determined by the hazard ratio estimates for systolic blood pressure (SBP) of the main anatomical locations (**dot** symbols), each followed by the relevant specific locations or morphologies marked with ^ (+ symbols) for the main analysis adjusted for potential confounders and risk factors (as per Figure 2) (other locations, not included in those specified, are shown last).

**SUPPLEMENTARY RESULTS AND DISCUSSION**

Literature reports are often controversial for cancers, for which we found no association with blood pressure (BP) within the main analyses.

***Malignant melanoma***

We found no association of BP with the risk of malignant melanoma of the skin, with a reasonably large number of cases (n=1617) (Figure 2).

However, reports from the Me-Can support a positive association for malignant melanoma: for men (n=1015): HR=1.22 (1.08-1.39) per SD higher mid-BP (mean of systolic BP (SBP) and diastolic BP (DBP)), as well as in women (n=713): HR=1.15 (1.03-1.28) [1], with similar findings per 10mmHg higher mid-BP [2].

***Cancers of the liver, gallbladder and bile ducts***

We found some suggestion for a positive association of systolic blood pressure (SBP) with hepatocellular cancer (HCC) only in a small number of never smokers (n=49): hazard ratio HR=1.15 (95% confidence interval 0.99-1.33) and not with HCC in the total cohort (n=191) or with cancers of the gallbladder and bile ducts (n=346) (Figure 2).

Our latter observation is supported by results from the Metabolic Syndrome and Cancer study (Me-Can), for which Borena et al. found no association of mid-BP (mean of SBP and diastolic blood pressure (DBP)) with the risk of cancer of the gallbladder [3]. However, Me-Can findings for liver are less consistent. Whilst Borena et al., considering jointly HCC and intrahepatic cholangiocarcinoma, reported a borderline higher risk only when comparing the highest with the lowest quintile of mid-BP: HR=2.08 (0.95-4.73), but not per SD higher mid-BP [4], whilst Stocks et al. found a positive association, considering separately men women: men (n=188): HR=1.19 (0.97-1.47), women (n=67): HR=1.43 (1.05=1.94) [2].

***Pancreas***

For pancreatic cancer, we found evidence for association only at BMI $\leq$ 25kg/m<sup>2</sup> (n=428): HR=1.07 (1.02-1.12) for SBP and borderline for DBP=1.08 (0.98-1.19) (Supplemental Figure 1), but not in the total cohort (n=990) (Figure 2).

Published results are, to some extent, controversial. For the Me-Can project Johansen et al. [5] and later Stocks et al. reported a positive association of mid-BP and pancreatic cancer, in men (n=503): HR=1.14 (1.00-1.31) per 10mmHg and in women (n=295): HR=1.27 (1.09-1.48) [2]. At the same time, an Italian case-control study (n=326) was suggestive of a negative association in individuals with treated hypertension [6].



### **Bladder**

We found no evidence for association of BP with bladder cancer, with a reasonably large number of samples (n=1,192) (Figure 2).

In contrast, Haggstrom et al. reported for the Me-Can study a positive association of mid-BP with the risk of bladder cancer in men (n=1587): HR=1.13 (1.03-1.25) per SD higher mid-BP and only with a trend when considering separately quintile of SBP and DBP, but not in women (n=327): HR=0.87 (0.69-1.09) [7], with similar results when Stock et al. considered mid-BP per 10mmHg higher levels. At the same time, Jiang et al. reported, for a population-based case-control study of hypertension in the US (n=1585), a negative association in individuals with untreated hypertension (n=104): odds ratio OR=0.65 (0.48-0.88) and especially pronounced in current smokers with untreated hypertension (n=46): OR=0.43 (0.27-0.71), but no evidence for association was found in individuals with hypertension who regularly used diuretics or other antihypertensive drugs [8].

### **Ovary**

We found no evidence for association of BP with ovarian cancer, with a reasonably large number of samples (n=1,007) (Figure 2).

Our results are compatible with the findings of Soler et al. from a large Italian case-control study, which did not support an association of hypertension with ovarian cancer (n=970) [9]. More recently Bjorge et al. reported for the Me-Can study results suggestive of a positive association of mid-BP with the risk of epithelial ovarian cancer only in women younger than 50 years (n=161): HR=1.30 (0.95-1.78) per SD higher mid-BP and not in older women (n=483) and also some stronger evidence for a positive association with the risk of endometrioid ovarian cancer (n=66): HR=1.63 (1.16-2.28) [10].

### **Thyroid**

Overall, there was no evidence for association of BP with the risk of thyroid cancer (n=420), except that there was some borderline positive association with DBP only at age≤53 years: HR=1.12 (0.98-1.28) (Supplemental Figure 1).

Whilst individual studies, similarly to our main results, could not support an association of high BP with thyroid cancer [9, 11], a Yin et al. in a recent meta-analysis, including 7 studies addressing hypertension, has reported a positive association : relative risk RR=1.14 (1.06-1.23) [12].

### **Brain and central nervous system (CNS)**

We found no evidence for association of BP with the risk of cancers of the brain and CNS (n=591) (Figure 2), except for a negative association of SBP with glioblastoma, observed only in men (n=153): HR=0.90 (0.82-0.99).

On the contrary, results from Me-Can support a positive association for brain & CNS cancer (n=1312) and more specifically for meningiomas (n=348): HR=1.41 (1.16-1.78) per SD higher SBP and

HR=1.43 (1.16-1.78) for DBP, but not for gliomas [13]. We did not consider meningiomas separately, as there were only 19 cases.

### ***Other locations***

Among AC morphology in other locations, the risk of AC in locations not included in the main anatomical sites was positively associated with higher SBP (n=406): HR=1.08 (1.03-1.14) per 10mmHg and, only in men, additionally with DBP (n=158): HR=1.16 (1.00-1.35).

### ***Adjustment for antihypertensive treatment***

Tobin et al. have argued that studies of quantitative traits for BP should incorporate adjustment for treatment effect, with the addition of some increment to the “observed” (measured) BP, in order to obtain an estimate of the “underlying” (maximal) blood pressure [14], because antihypertensive treatment would reduce BP. We did not consider this approach appropriate for our study on the grounds outlined below. First, Tobin’s methodology addresses investigations of the aetiology of hypertension, i.e. when hypertension is the outcome, in which context mainly “underlying” BP would be of interest. When hypertension is examined as exposure, as in our case relative to cancer as an outcome, “observed” BP may be of relevance if high BP is potentially causally linked to cancer, but “underlying” BP may also be relevant if hypertension and cancer share common mechanisms. Further, Tobin’s methodology is built upon nontrivial assumptions that the “observed” BP is equivalent to the “underlying” BP in untreated individuals and that the “underlying” BP in treated individuals is equal to or higher than the “observed” BP. We have already pointed out in the main manuscript that the main limitation of our study is that BP was measured in a single time point, which may not be representative of the longer-term BP levels. BP could be affected by the emotional state of the individual during the study visit and hypertensive individuals may be more prone to emotional influences, even when treated.

**SUPPLEMENTARY REFERENCES**

1. Nagel G, Bjorge T, Stocks T, et al. Metabolic risk factors and skin cancer in the Metabolic Syndrome and Cancer Project (Me-Can). *Br J Dermatol* 2012; 167: 59-67
2. Stocks T, Van Hemelrijck M, Manjer J, et al. Blood pressure and risk of cancer incidence and mortality in the Metabolic Syndrome and Cancer Project. *Hypertension* 2012; 59: 802-810
3. Borena W, Edlinger M, Bjorge T, et al. A prospective study on metabolic risk factors and gallbladder cancer in the metabolic syndrome and cancer (Me-Can) collaborative study. *PLoS One* 2014; 9: e89368
4. Borena W, Strohmaier S, Lukanova A, et al. Metabolic risk factors and primary liver cancer in a prospective study of 578,700 adults. *Int J Cancer* 2012; 131: 193-200
5. Johansen D, Stocks T, Jonsson H, et al. Metabolic factors and the risk of pancreatic cancer: a prospective analysis of almost 580,000 men and women in the Metabolic Syndrome and Cancer Project. *Cancer Epidemiol Biomarkers Prev* 2010; 19: 2307-2317
6. Rosato V, Tavani A, Bosetti C, et al. Metabolic syndrome and pancreatic cancer risk: a case-control study in Italy and meta-analysis. *Metabolism* 2011; 60: 1372-1378
7. Häggström C ST, Rapp K, Bjørge T, Lindkvist B, Concin H, Et Al. Metabolic syndrome and risk of bladder cancer: prospective cohort study in the metabolic syndrome and cancer project (Me-Can). *Int J Cancer* 2011; 128: 1890-1898
8. Jiang X, Castela JE, Yuan JM, et al. Hypertension, diuretics and antihypertensives in relation to bladder cancer. *Carcinogenesis* 2010; 31: 1964-1971
9. Soler M, Chatenoud L, Negri E, et al. Hypertension and hormone-related neoplasms in women. *Hypertension* 1999; 34: 320-325
10. Bjorge T, Lukanova A, Tretli S, et al. Metabolic risk factors and ovarian cancer in the Metabolic Syndrome and Cancer project. *Int J Epidemiol* 2011; 40: 1667-1677
11. Almquist M, Johansen D, Bjorge T, et al. Metabolic factors and risk of thyroid cancer in the Metabolic syndrome and Cancer project (Me-Can). *Cancer Causes Control* 2011; 22: 743-751
12. Yin DT, He H, Yu K, et al. The association between thyroid cancer and insulin resistance, metabolic syndrome and its components: A systematic review and meta-analysis. *Int J Surg* 2018; 57: 66-75
13. Edlinger M, Strohmaier S, Jonsson H, et al. Blood pressure and other metabolic syndrome factors and risk of brain tumour in the large population-based Me-Can cohort study. *J Hypertens* 2012; 30: 290-296
14. Tobin MD, Sheehan NA, Scurrah KJ, et al. Adjusting for treatment effects in studies of quantitative traits: antihypertensive therapy and systolic blood pressure. *Stat Med* 2005; 24: 2911-2935
