# Supplementary material
Source: PubMed Central journal article supplement (PMC7115826)
Supplement: EMS86622-supplement-Figure_S1___Forest_plots_for_subgroup_analyses.pdf [file EMS86622-supplement-Figure_S1___Forest_plots_for_subgroup_analyses.pdf]

**Supplementary Figure 1A: Forest plot of HR (95% CI) for sub-group analyses of continuous SBP and DBP**

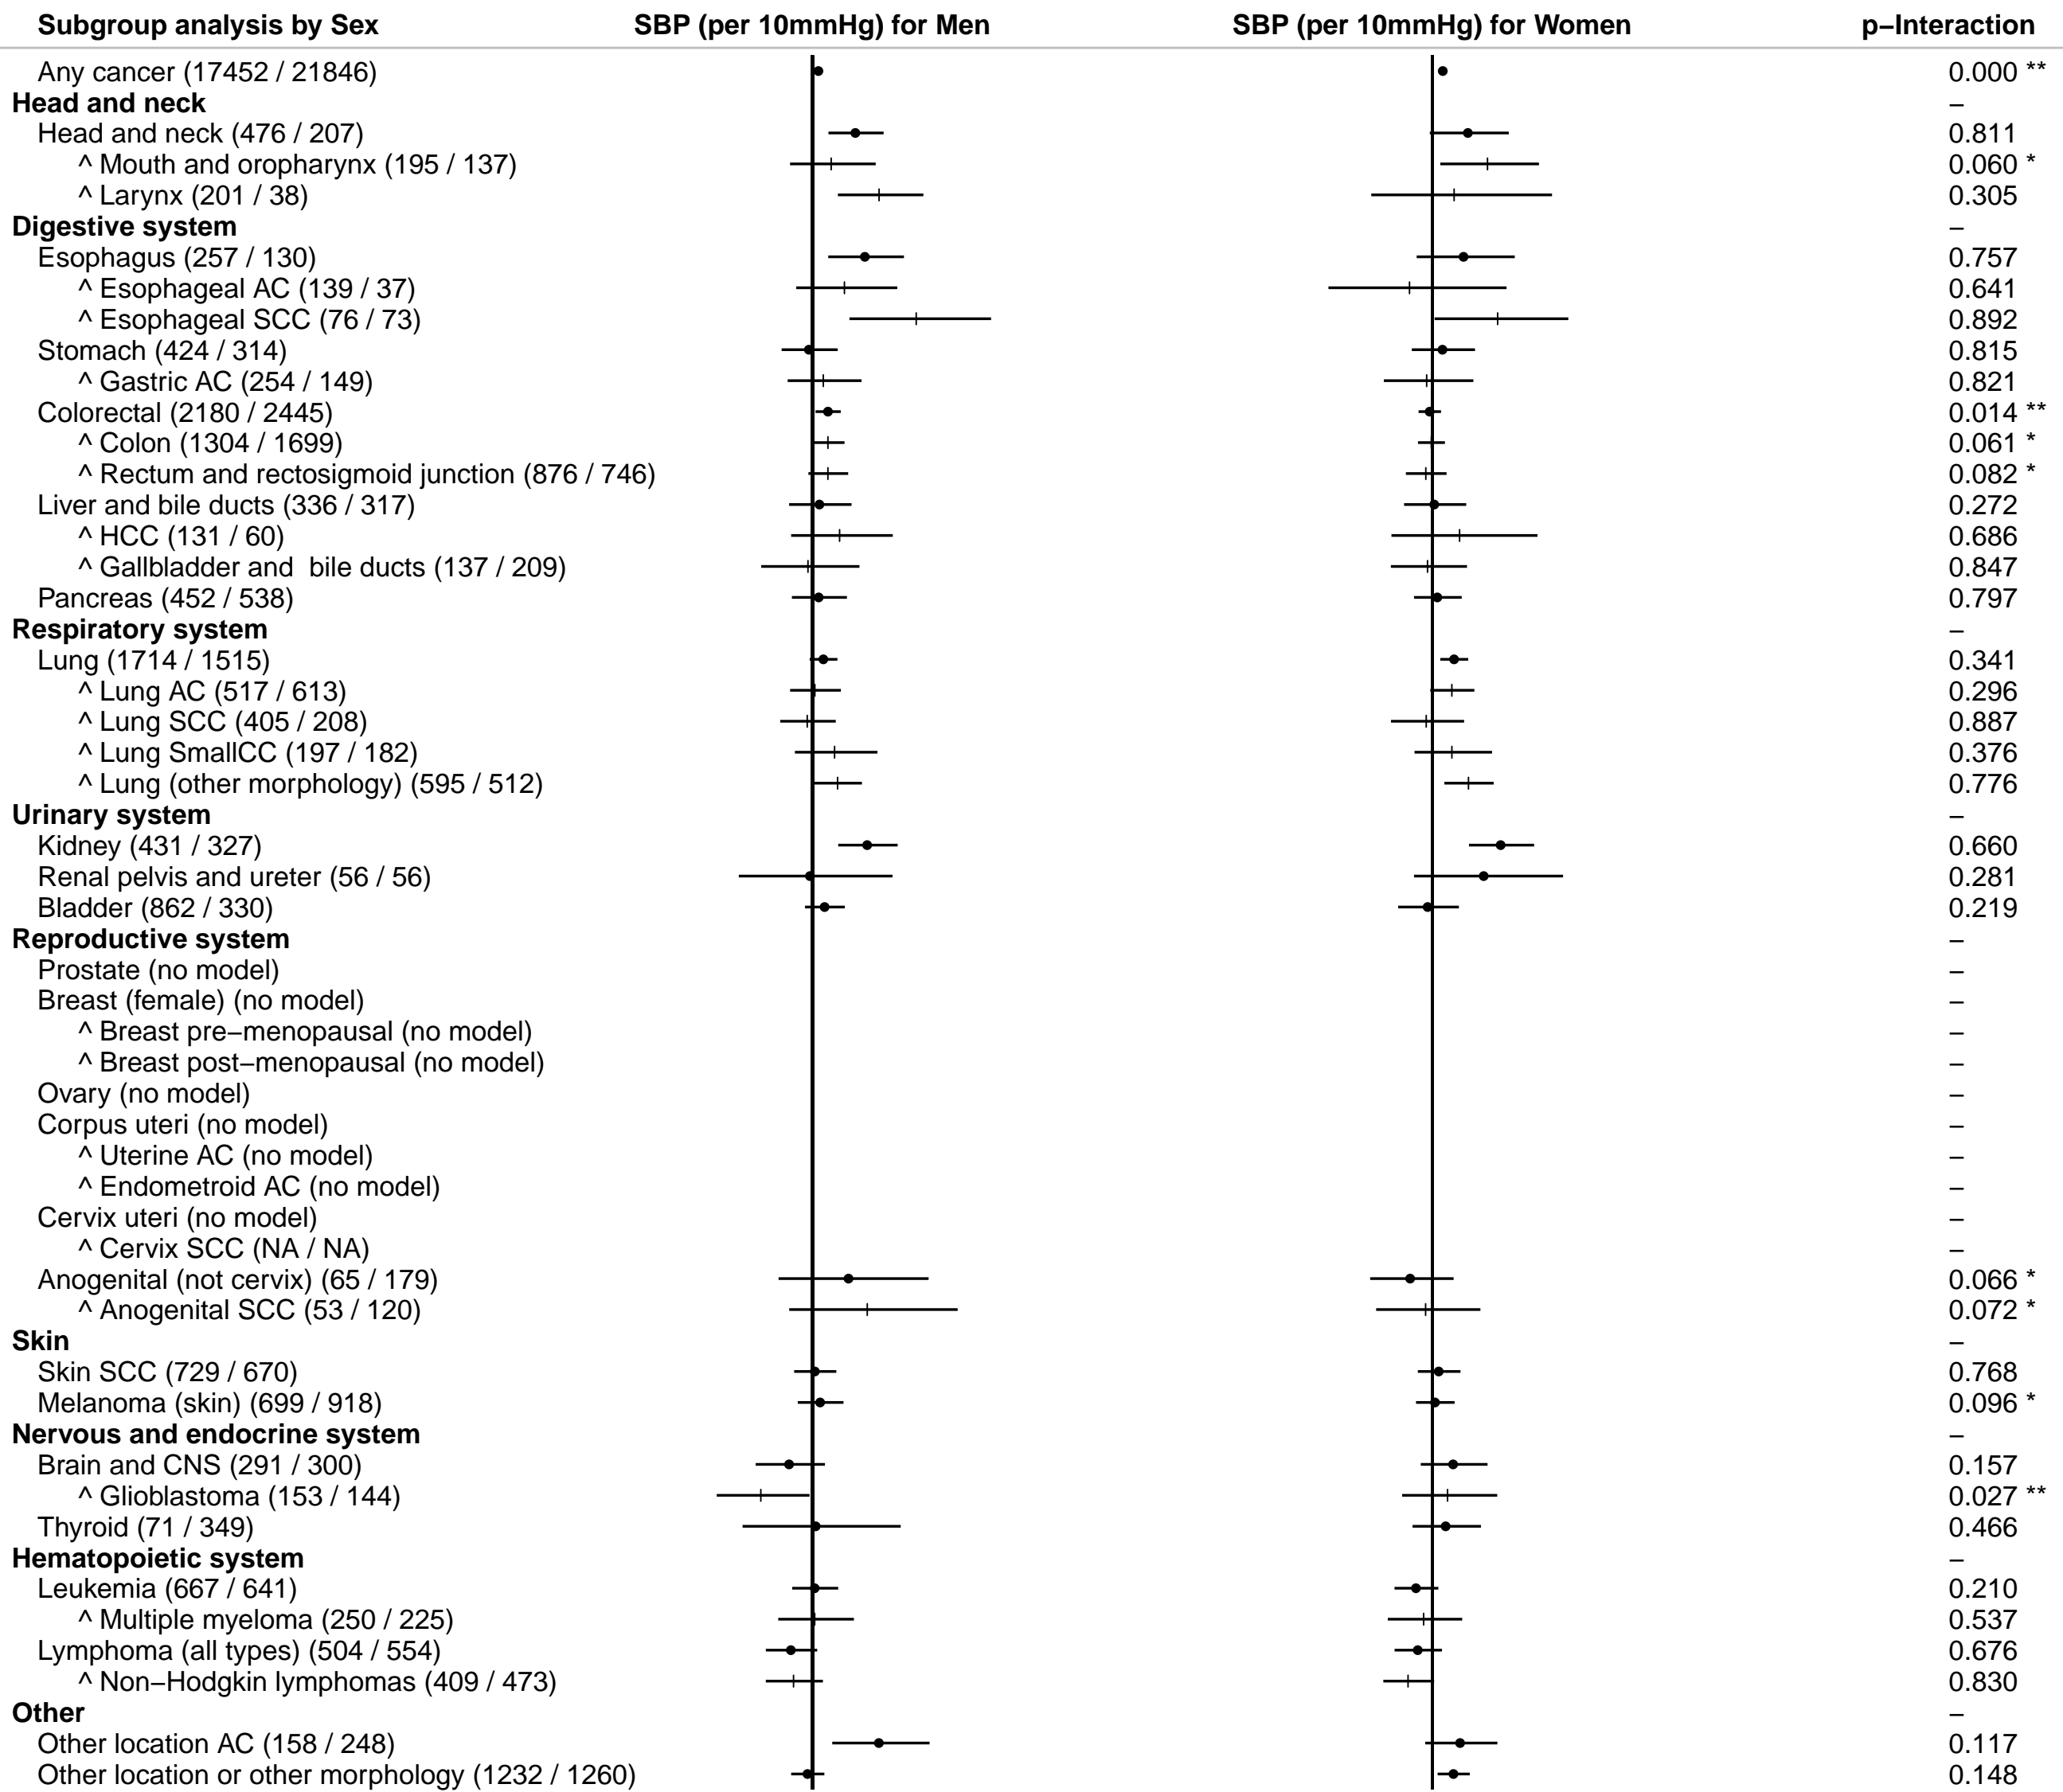

Adjusted hazard ratios (HR) (95% confidence intervals) from Cox proportional hazards models, stratified by age (5-year groups) and study centre and adjusted for confounders; Cancer types (cases per group) are described in Supplementary Table 1; AC adenocarcinoma; CNS central nervous system; HCC hepatocellular carcinoma; SCC squamous cell carcinoma; SmallCC small cell carcinoma; DBP or SBP – diastolic or systolic blood pressure; Treatment – antihypertensive treatment; Interaction p-values from likelihood ratio tests comparing nested models with and without an interaction term (multiplicative scale): \* p<0.1; \*\* p<0.05. Main anatomical sites ordered by body system, as in Figure 2.

Hazard ratio

0.9 1.0 1.1 1.2 1.3 1.4 1.5 1.6

0.9 1.0 1.1 1.2 1.3 1.4 1.5 1.6

Supplementary Figure 1B: Forest plot of HR (95% CI) for sub-group analyses of continuous SBP and DBP

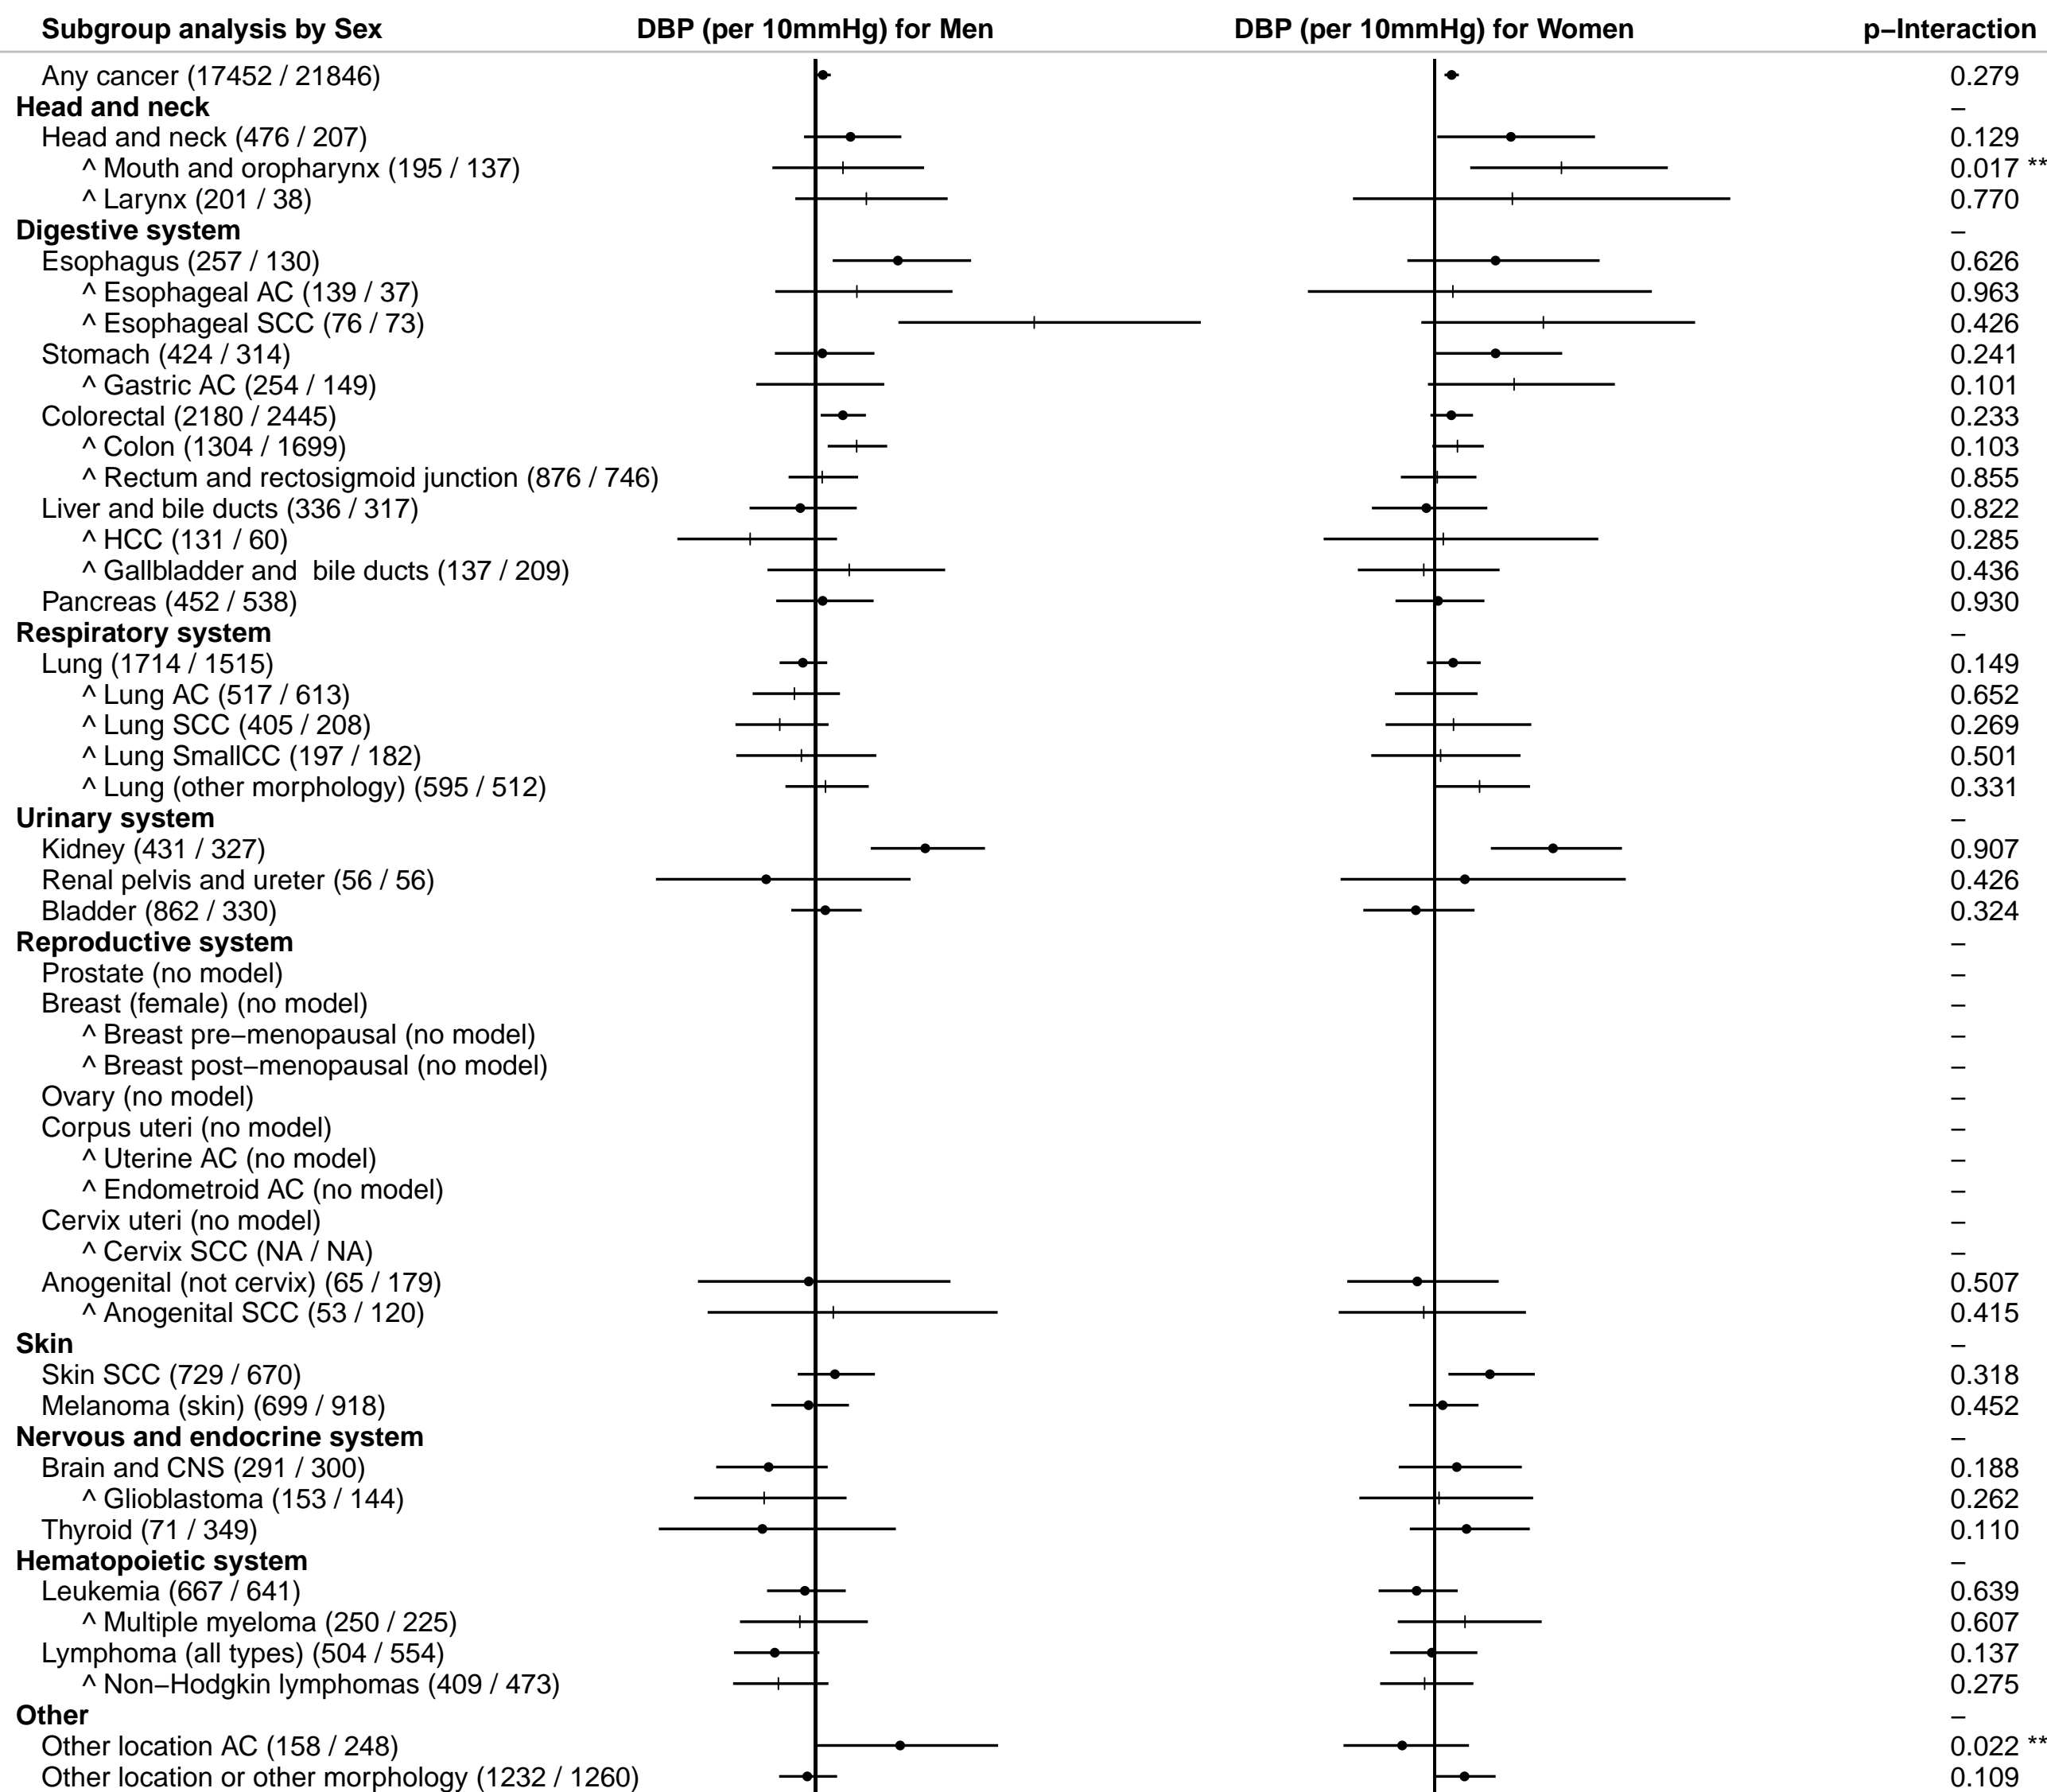

Adjusted hazard ratios (HR) (95% confidence intervals) from Cox proportional hazards models, stratified by age (5-year groups) and study centre and adjusted for confounders; Cancer types (cases per group) are described in Supplementary Table 1; AC adenocarcinoma; CNS central nervous system; HCC hepatocellular carcinoma; SCC squamous cell carcinoma; SmallCC small cell carcinoma; DBP or SBP – diastolic or systolic blood pressure; Treatment – antihypertensive treatment; Interaction p-values from likelihood ratio tests comparing nested models with and without an interaction term (multiplicative scale): \* p<0.1; \*\* p<0.05. Main anatomical sites ordered by body system, as in Figure 2.

Hazard ratio

0.9 1.0 1.1 1.2 1.3 1.4 1.5 1.6

0.9 1.0 1.1 1.2 1.3 1.4 1.5 1.6

**Supplementary Figure 1C: Forest plot of HR (95% CI) for sub-group analyses of continuous SBP and DBP**

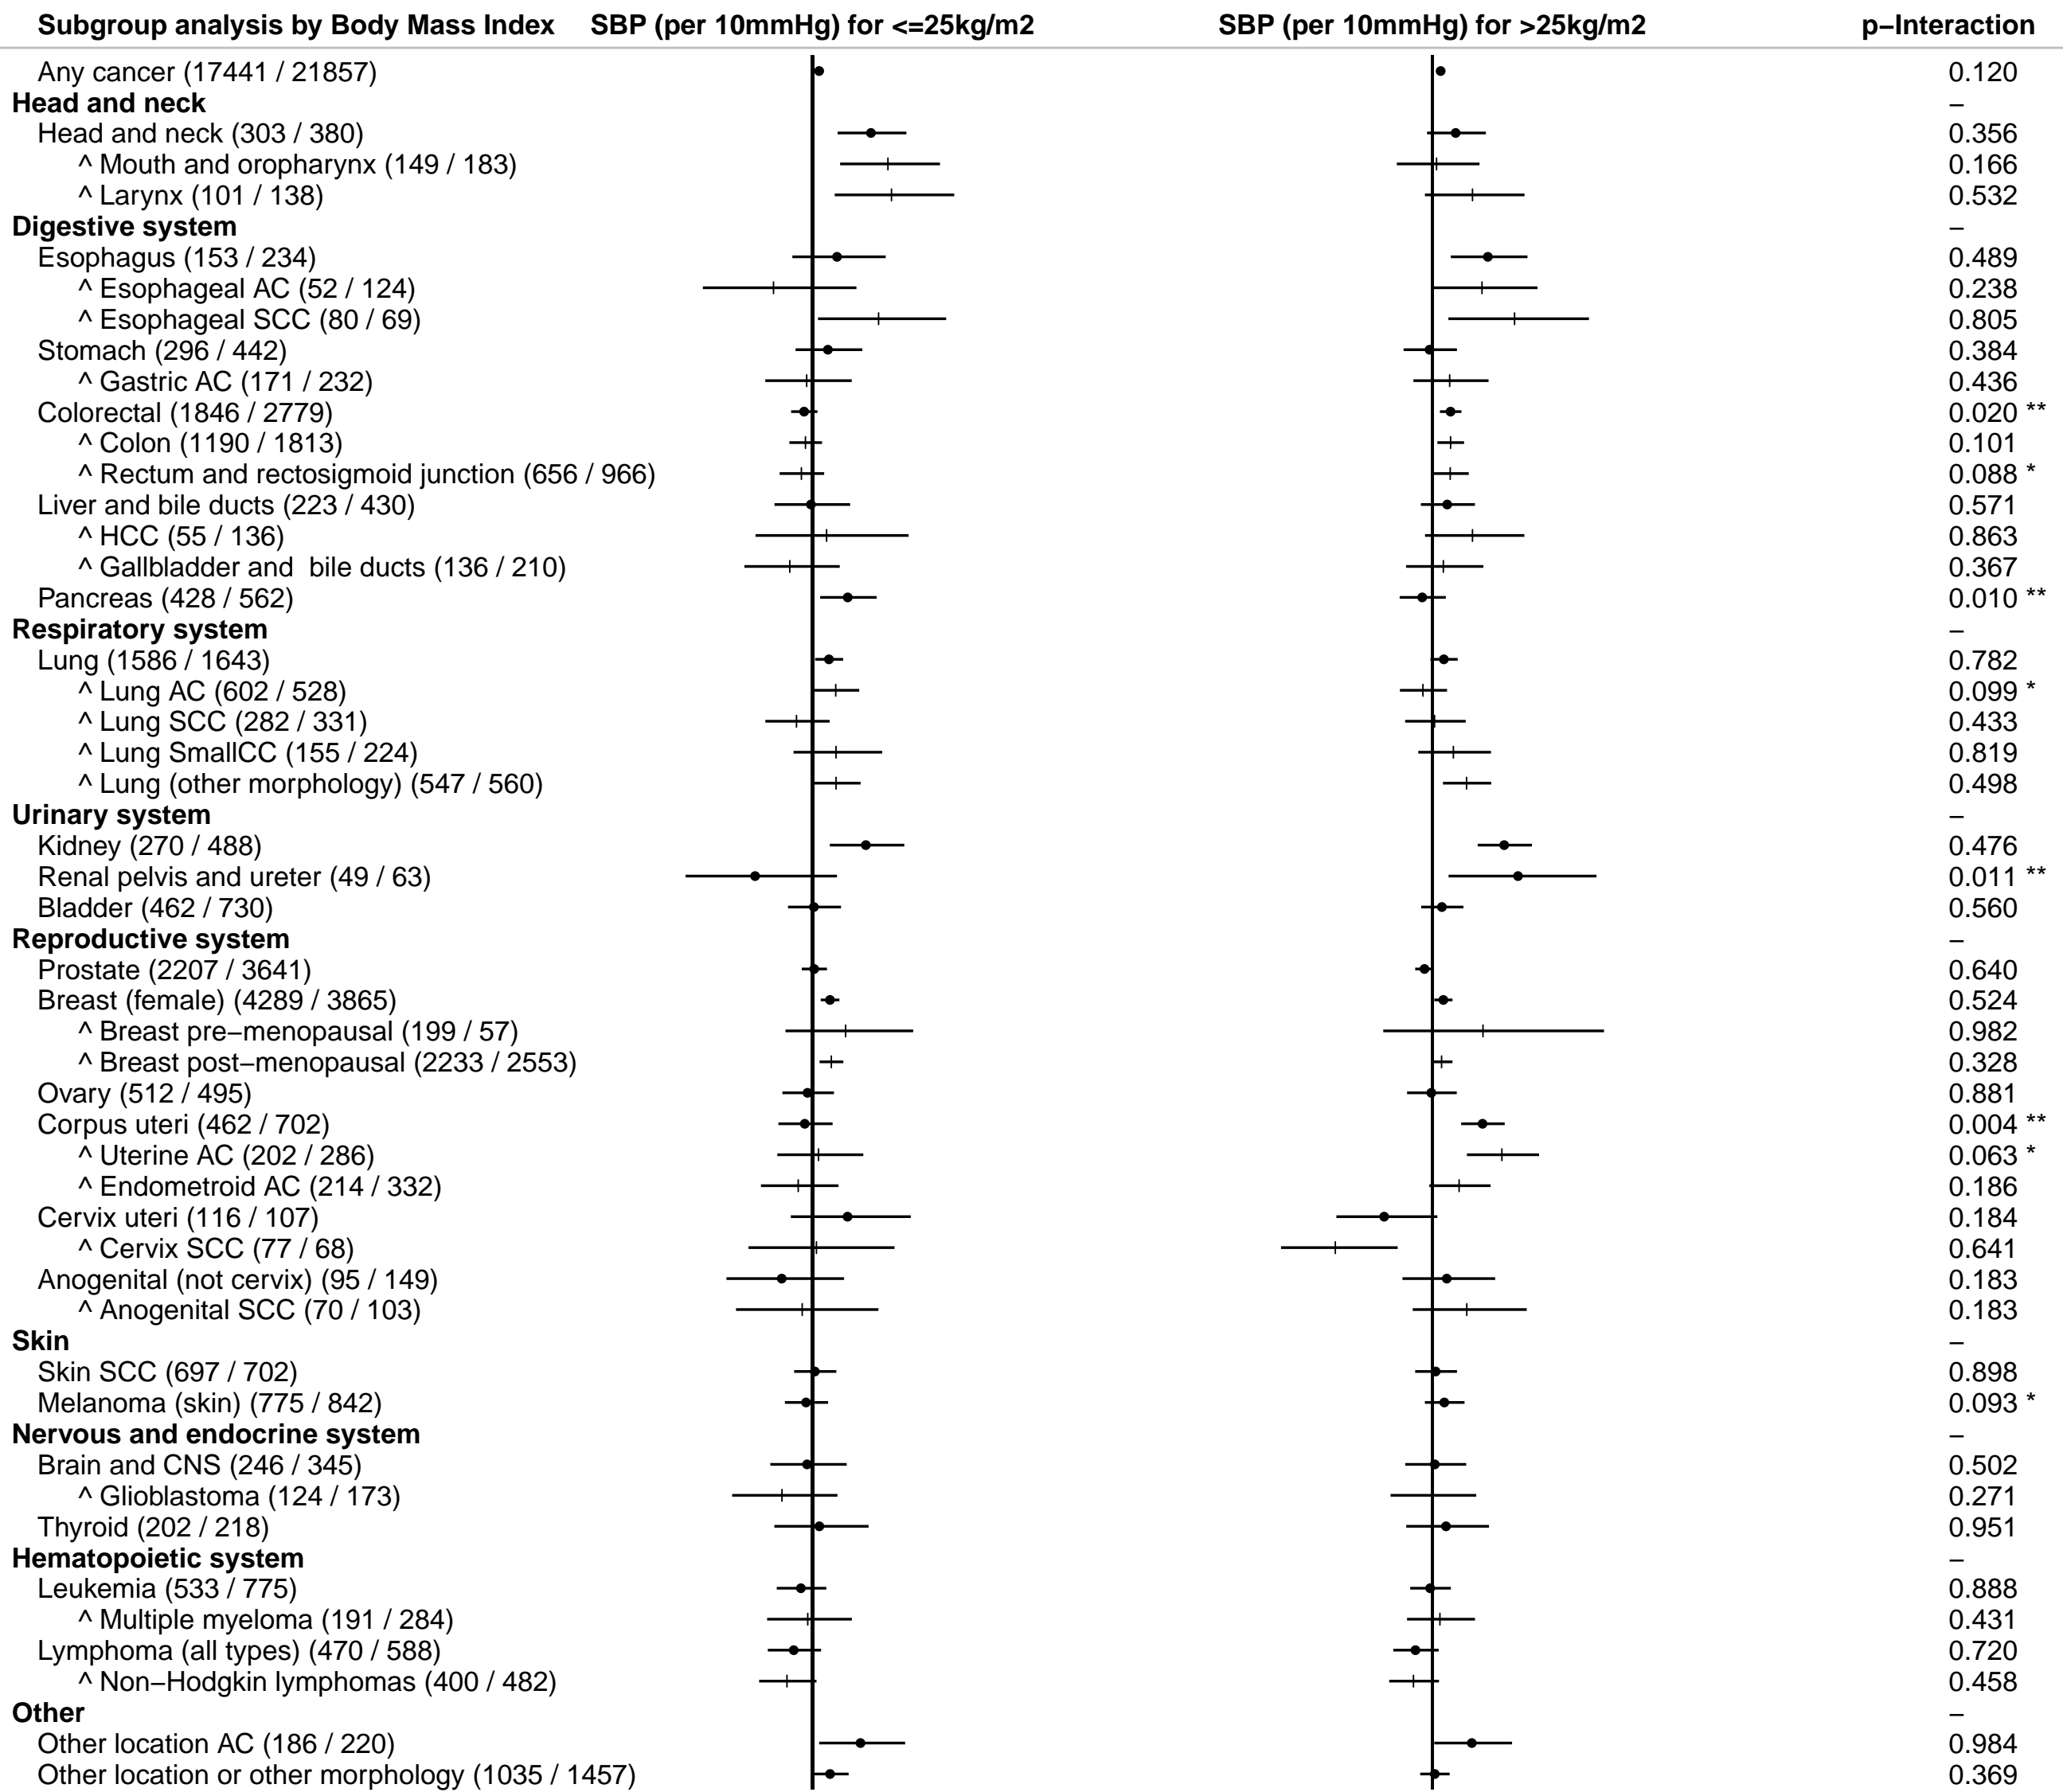

Adjusted hazard ratios (HR) (95% confidence intervals) from Cox proportional hazards models, stratified by age (5-year groups) and study centre and adjusted for confounders; Cancer types (cases per group) are described in Supplementary Table 1; AC adenocarcinoma; CNS central nervous system; HCC hepatocellular carcinoma; SCC squamous cell carcinoma; SmallCC small cell carcinoma; DBP or SBP – diastolic or systolic blood pressure; Treatment – antihypertensive treatment; Interaction p-values from likelihood ratio tests comparing nested models with and without an interaction term (multiplicative scale): \* p<0.1; \*\* p<0.05. Main anatomical sites ordered by body system, as in Figure 2.

Hazard ratio

0.9 1.0 1.1 1.2 1.3 1.4 1.5 1.6

0.9 1.0 1.1 1.2 1.3 1.4 1.5 1.6

Supplementary Figure 1D: Forest plot of HR (95% CI) for sub-group analyses of continuous SBP and DBP

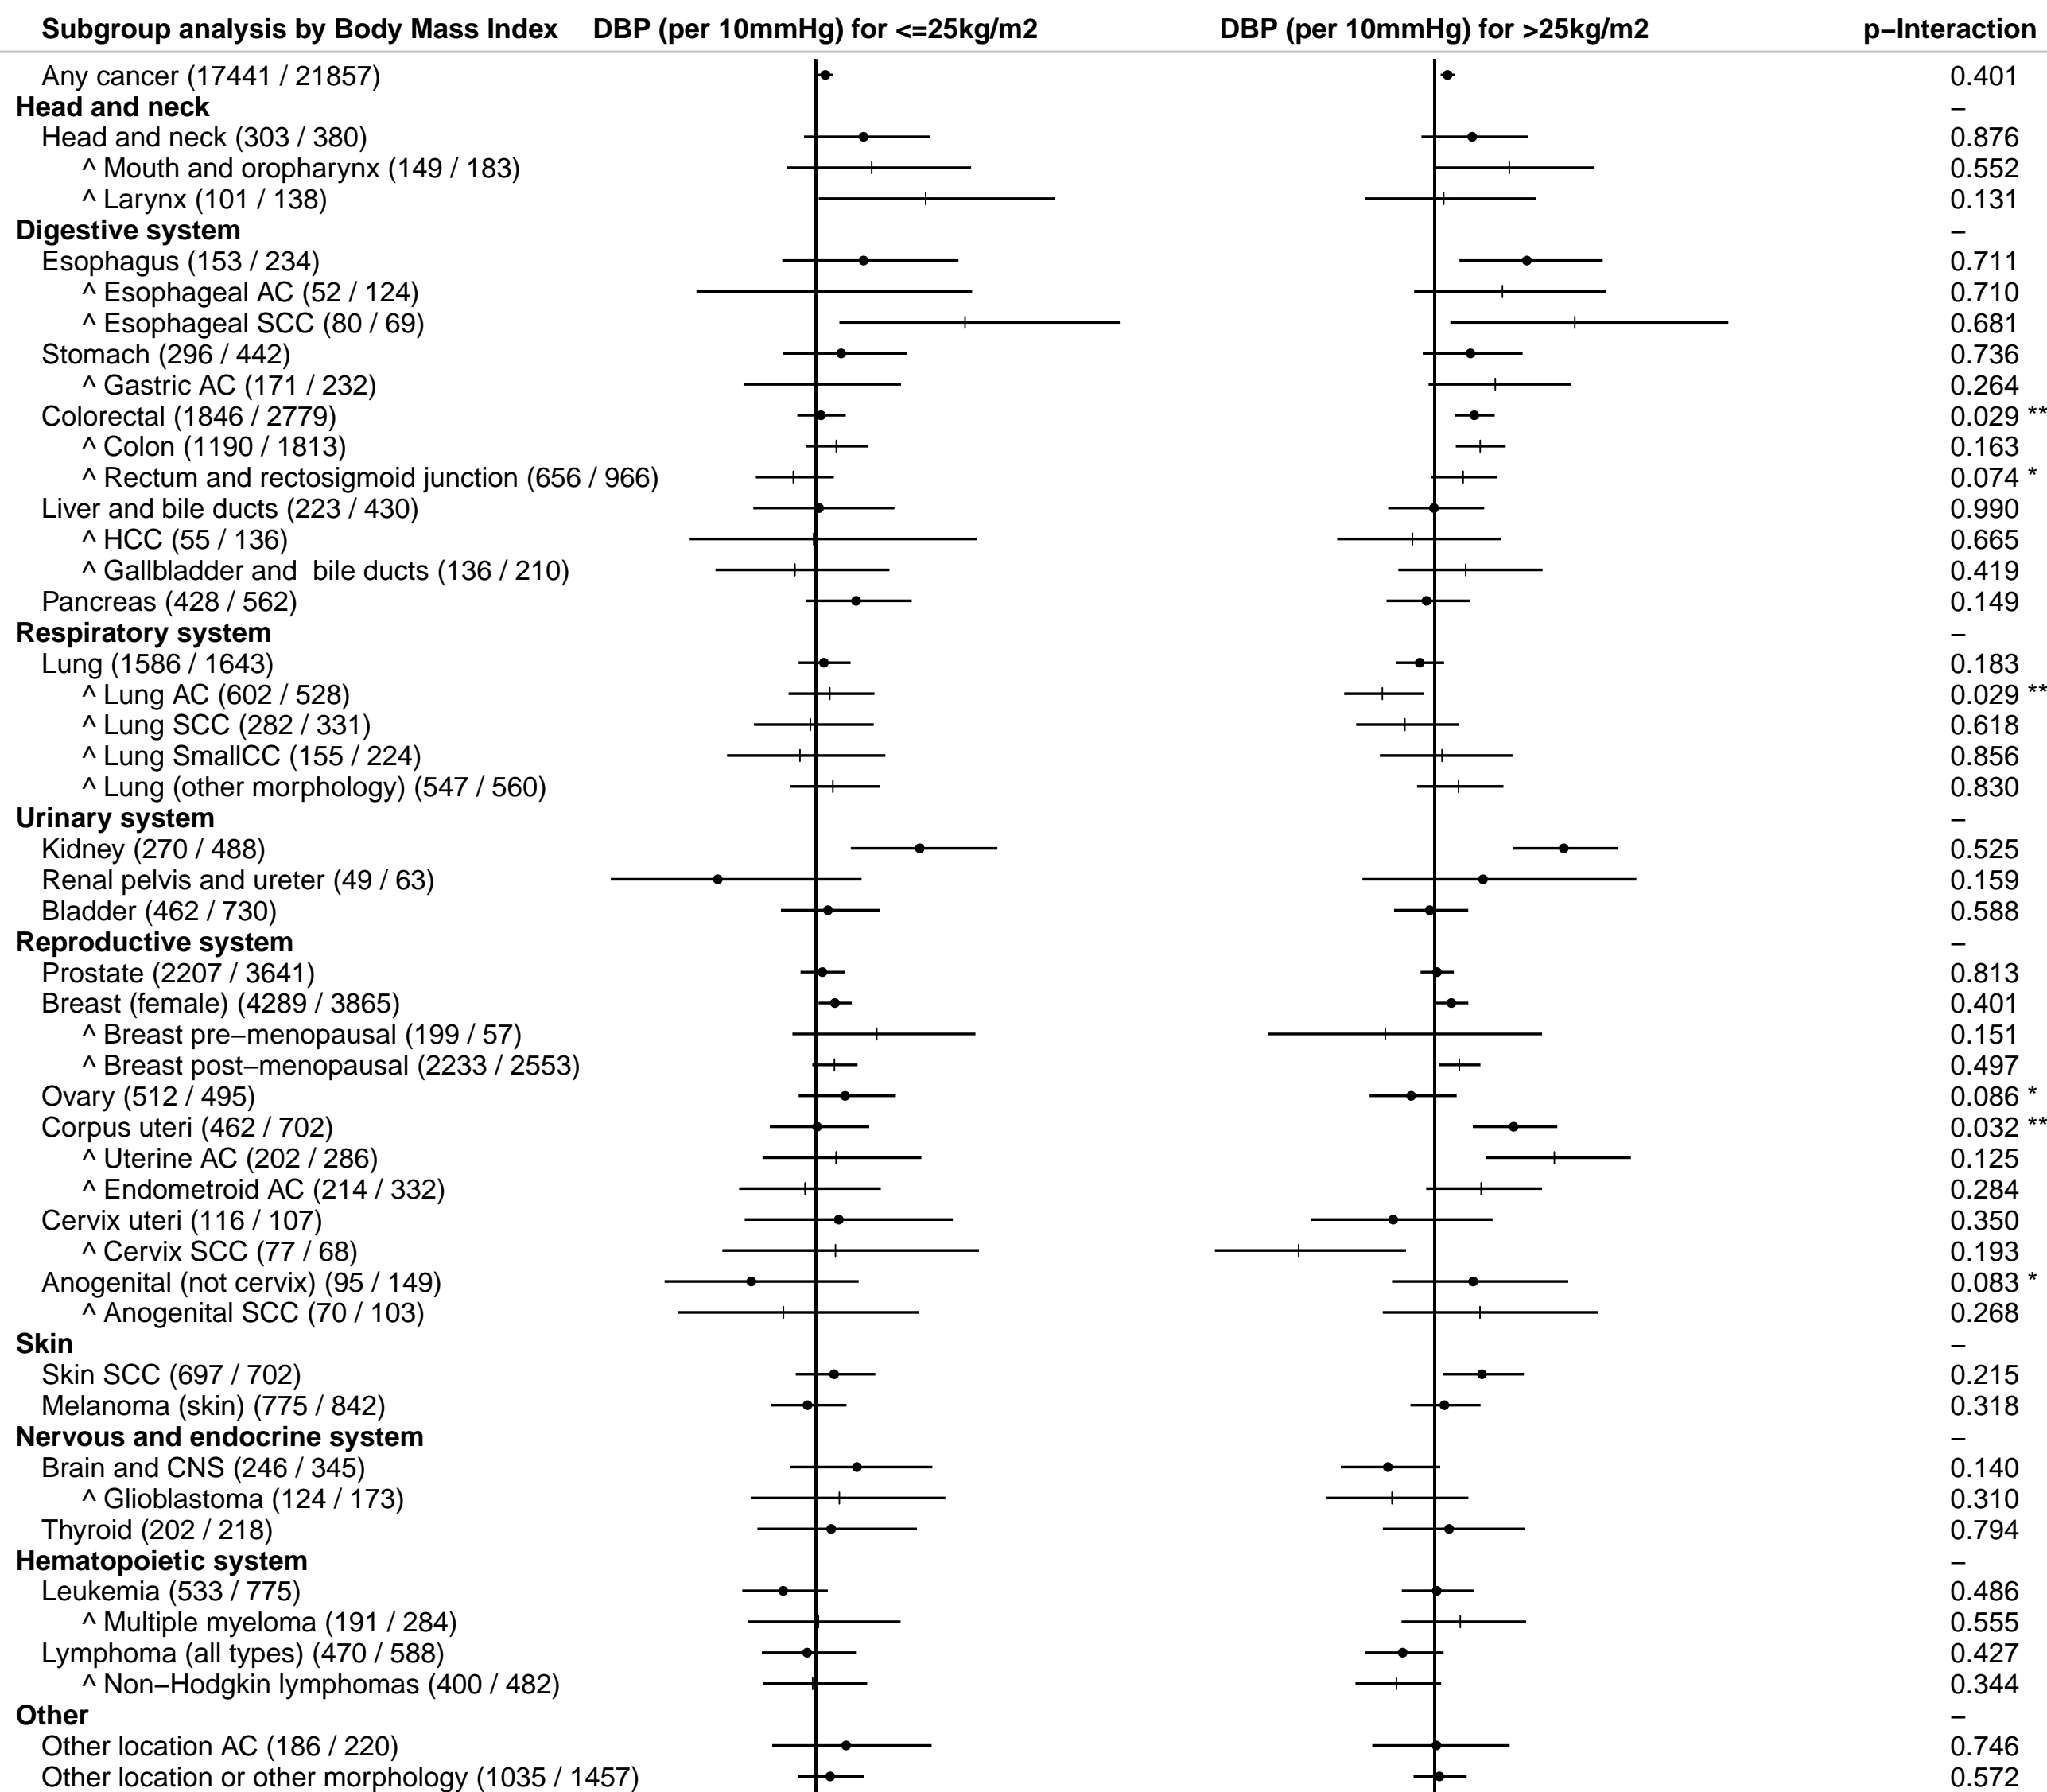

Adjusted hazard ratios (HR) (95% confidence intervals) from Cox proportional hazards models, stratified by age (5-year groups) and study centre and adjusted for confounders; Cancer types (cases per group) are described in Supplementary Table 1; AC adenocarcinoma; CNS central nervous system; HCC hepatocellular carcinoma; SCC squamous cell carcinoma; SmallCC small cell carcinoma; DBP or SBP – diastolic or systolic blood pressure; Treatment – antihypertensive treatment; Interaction p-values from likelihood ratio tests comparing nested models with and without an interaction term (multiplicative scale): \* p<0.1; \*\* p<0.05. Main anatomical sites ordered by body system, as in Figure 2.

Hazard ratio

0.9 1.0 1.1 1.2 1.3 1.4 1.5 1.6

0.9 1.0 1.1 1.2 1.3 1.4 1.5 1.6

Supplementary Figure 1E: Forest plot of HR (95% CI) for sub-group analyses of continuous SBP and DBP

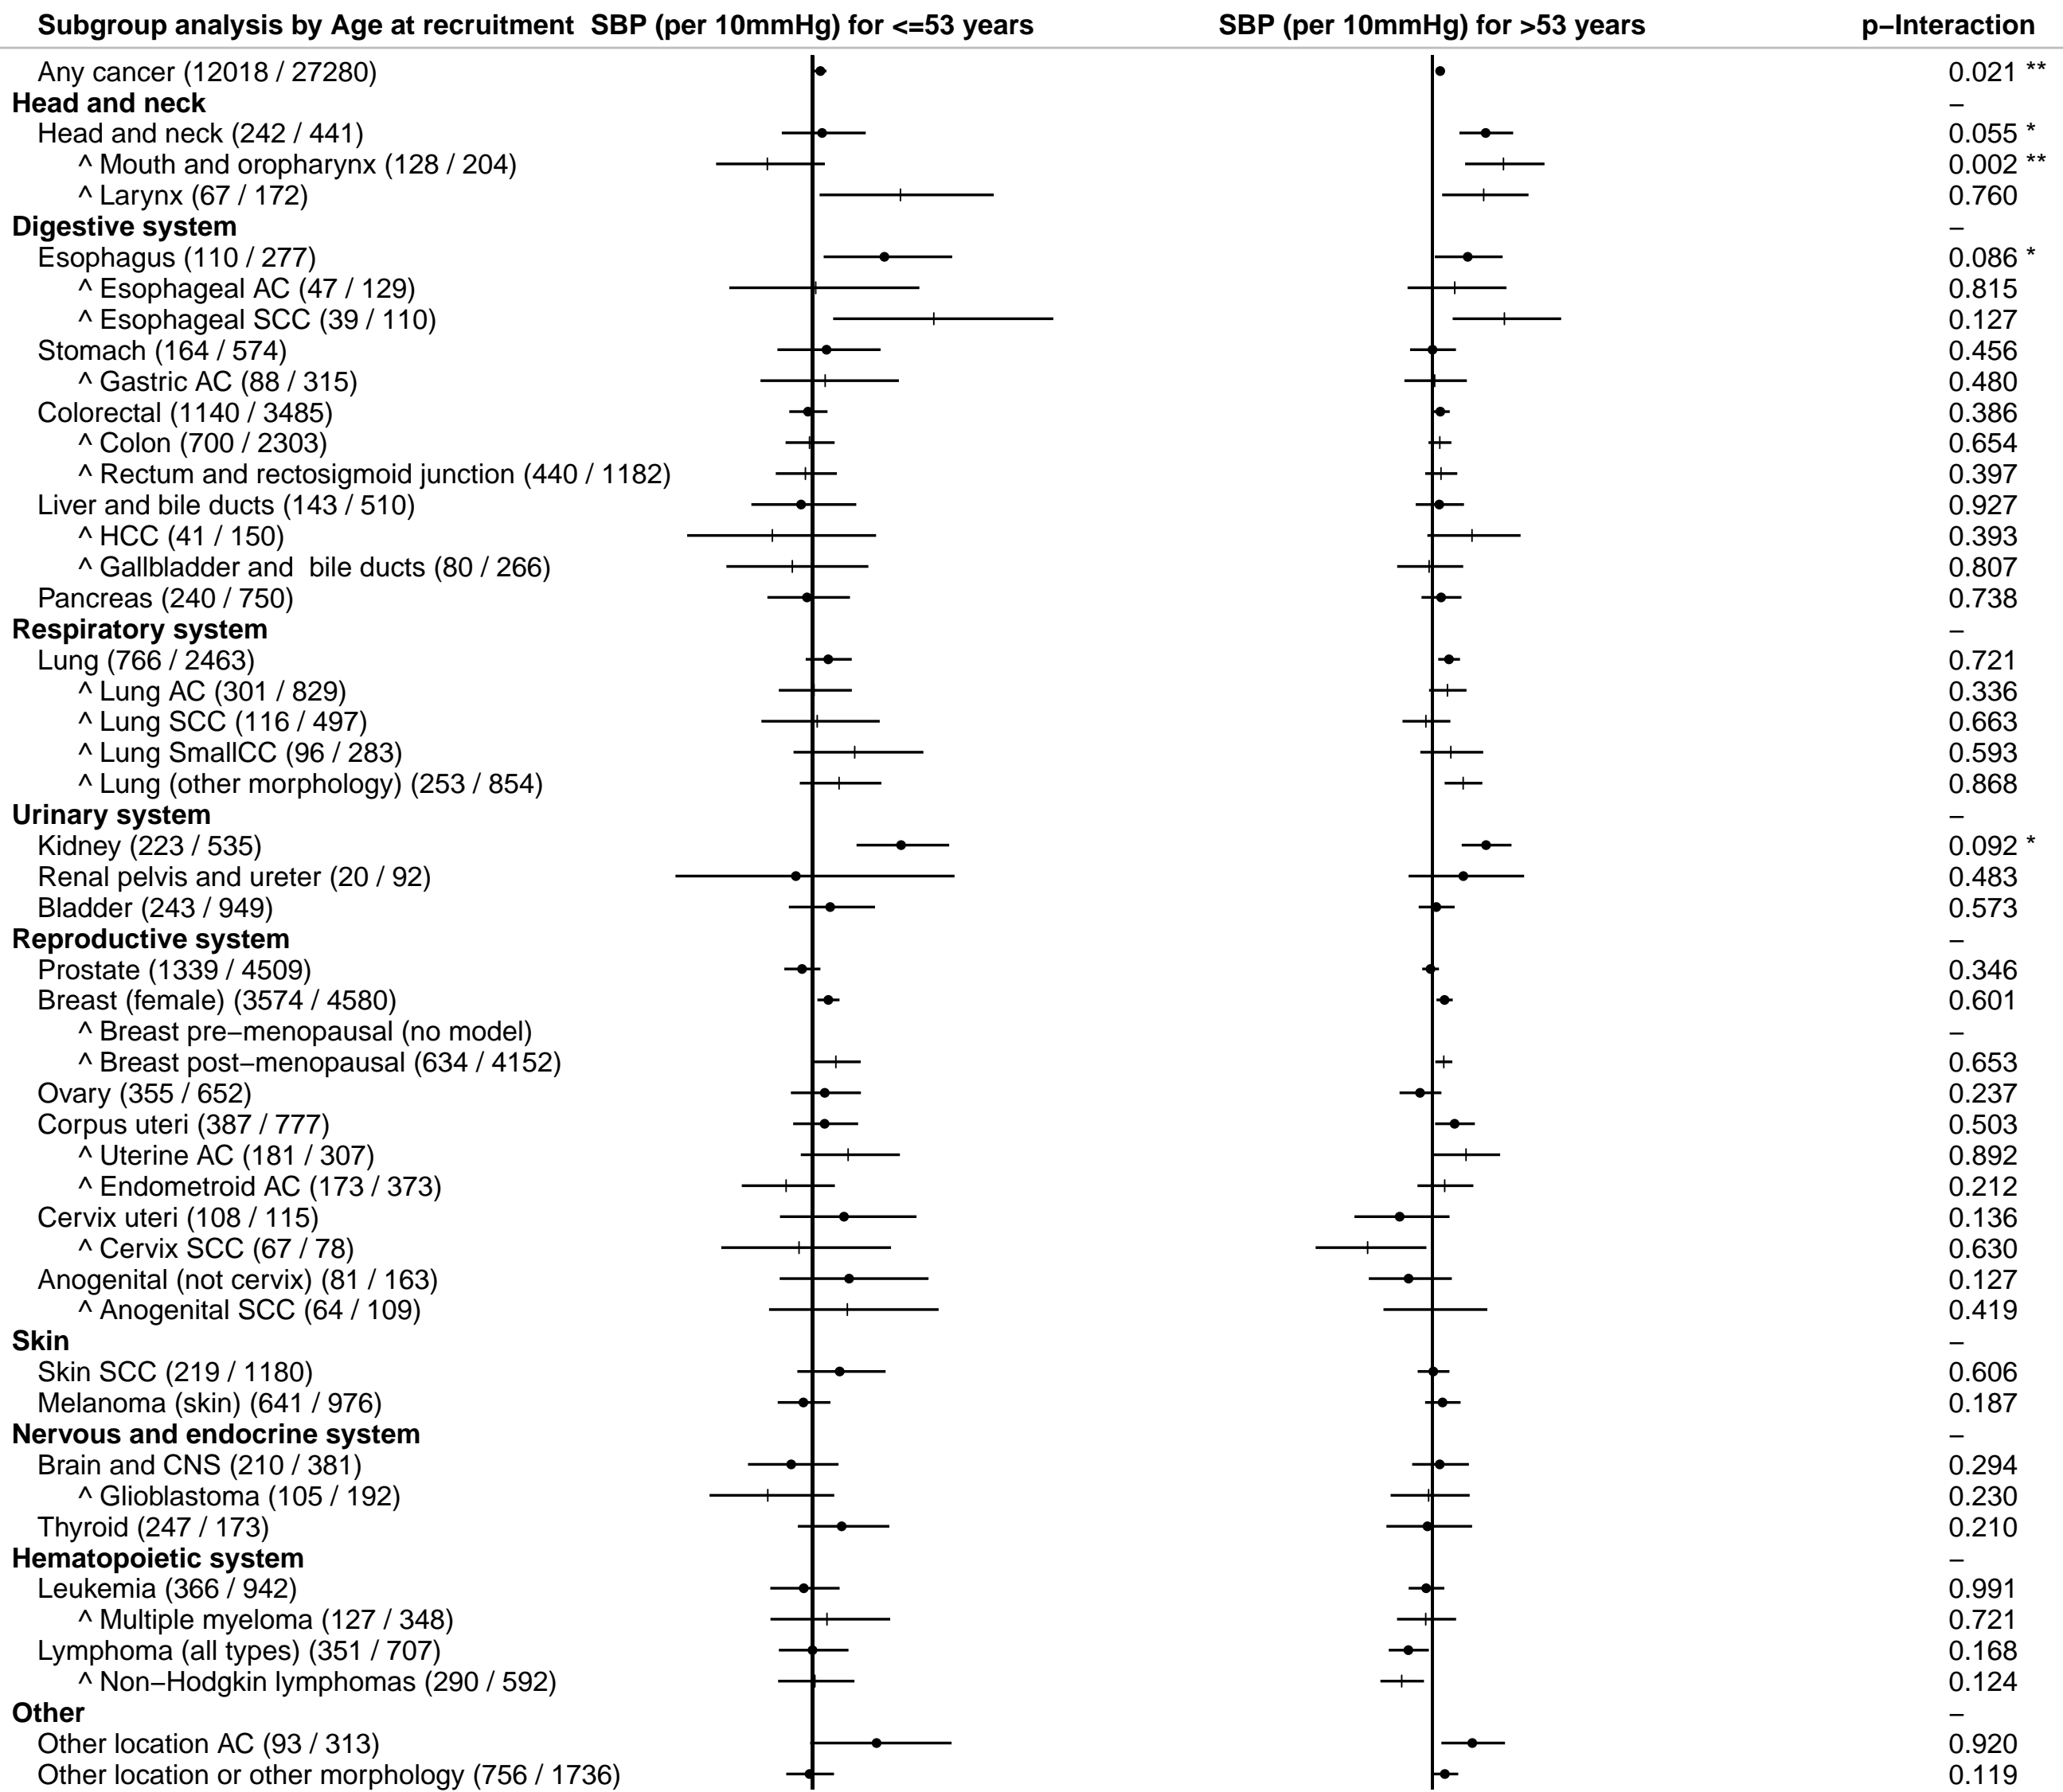

Adjusted hazard ratios (HR) (95% confidence intervals) from Cox proportional hazards models, stratified by age (5-year groups) and study centre and adjusted for confounders; Cancer types (cases per group) are described in Supplementary Table 1; AC adenocarcinoma; CNS central nervous system; HCC hepatocellular carcinoma; SCC squamous cell carcinoma; SmallCC small cell carcinoma; DBP or SBP – diastolic or systolic blood pressure; Treatment – antihypertensive treatment; Interaction p-values from likelihood ratio tests comparing nested models with and without an interaction term (multiplicative scale): \* p<0.1; \*\* p<0.05. Main anatomical sites ordered by body system, as in Figure 2.

Hazard ratio

0.9 1.0 1.1 1.2 1.3 1.4 1.5 1.6

0.9 1.0 1.1 1.2 1.3 1.4 1.5 1.6

Supplementary Figure 1F: Forest plot of HR (95% CI) for sub-group analyses of continuous SBP and DBP

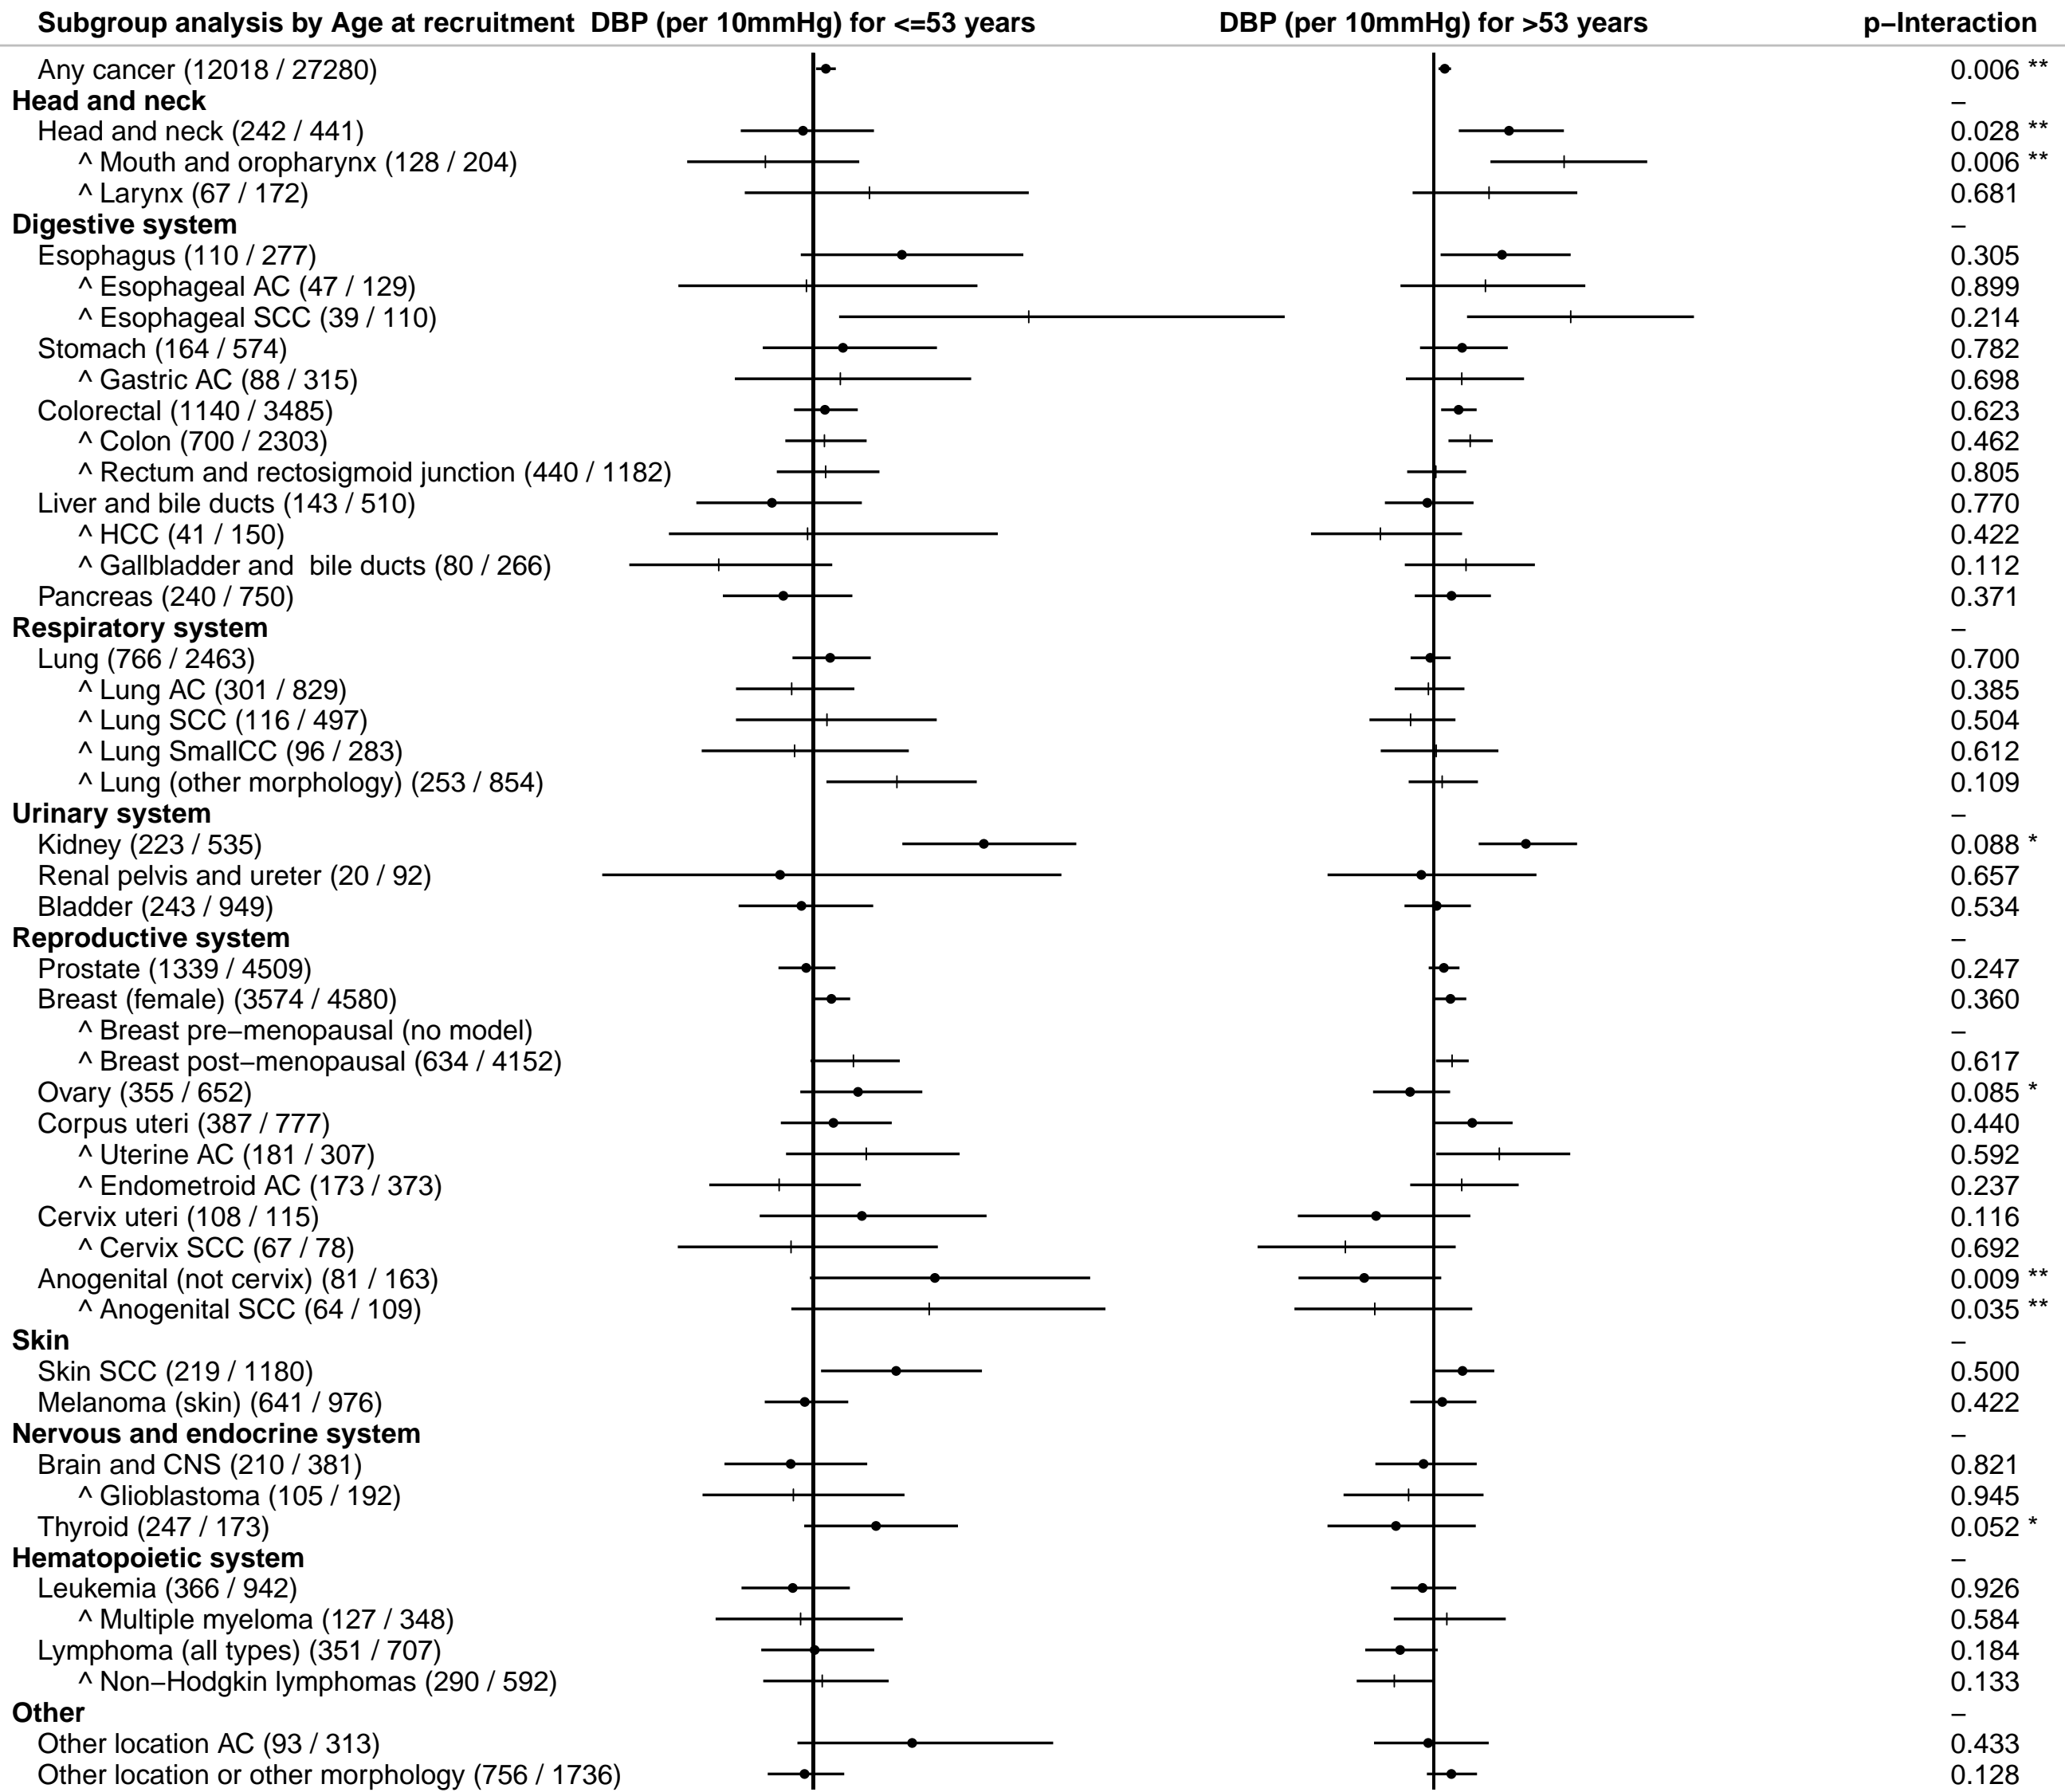

Adjusted hazard ratios (HR) (95% confidence intervals) from Cox proportional hazards models, stratified by age (5-year groups) and study centre and adjusted for confounders; Cancer types (cases per group) are described in Supplementary Table 1; AC adenocarcinoma; CNS central nervous system; HCC hepatocellular carcinoma; SCC squamous cell carcinoma; SmallCC small cell carcinoma; DBP or SBP – diastolic or systolic blood pressure; Treatment – antihypertensive treatment; Interaction p-values from likelihood ratio tests comparing nested models with and without an interaction term (multiplicative scale): \* p<0.1; \*\* p<0.05. Main anatomical sites ordered by body system, as in Figure 2.

Hazard ratio

0.9 1.0 1.1 1.2 1.3 1.4 1.5 1.6

0.9 1.0 1.1 1.2 1.3 1.4 1.5 1.6

**Supplementary Figure 1G: Forest plot of HR (95% CI) for sub-group analyses of continuous SBP and DBP**

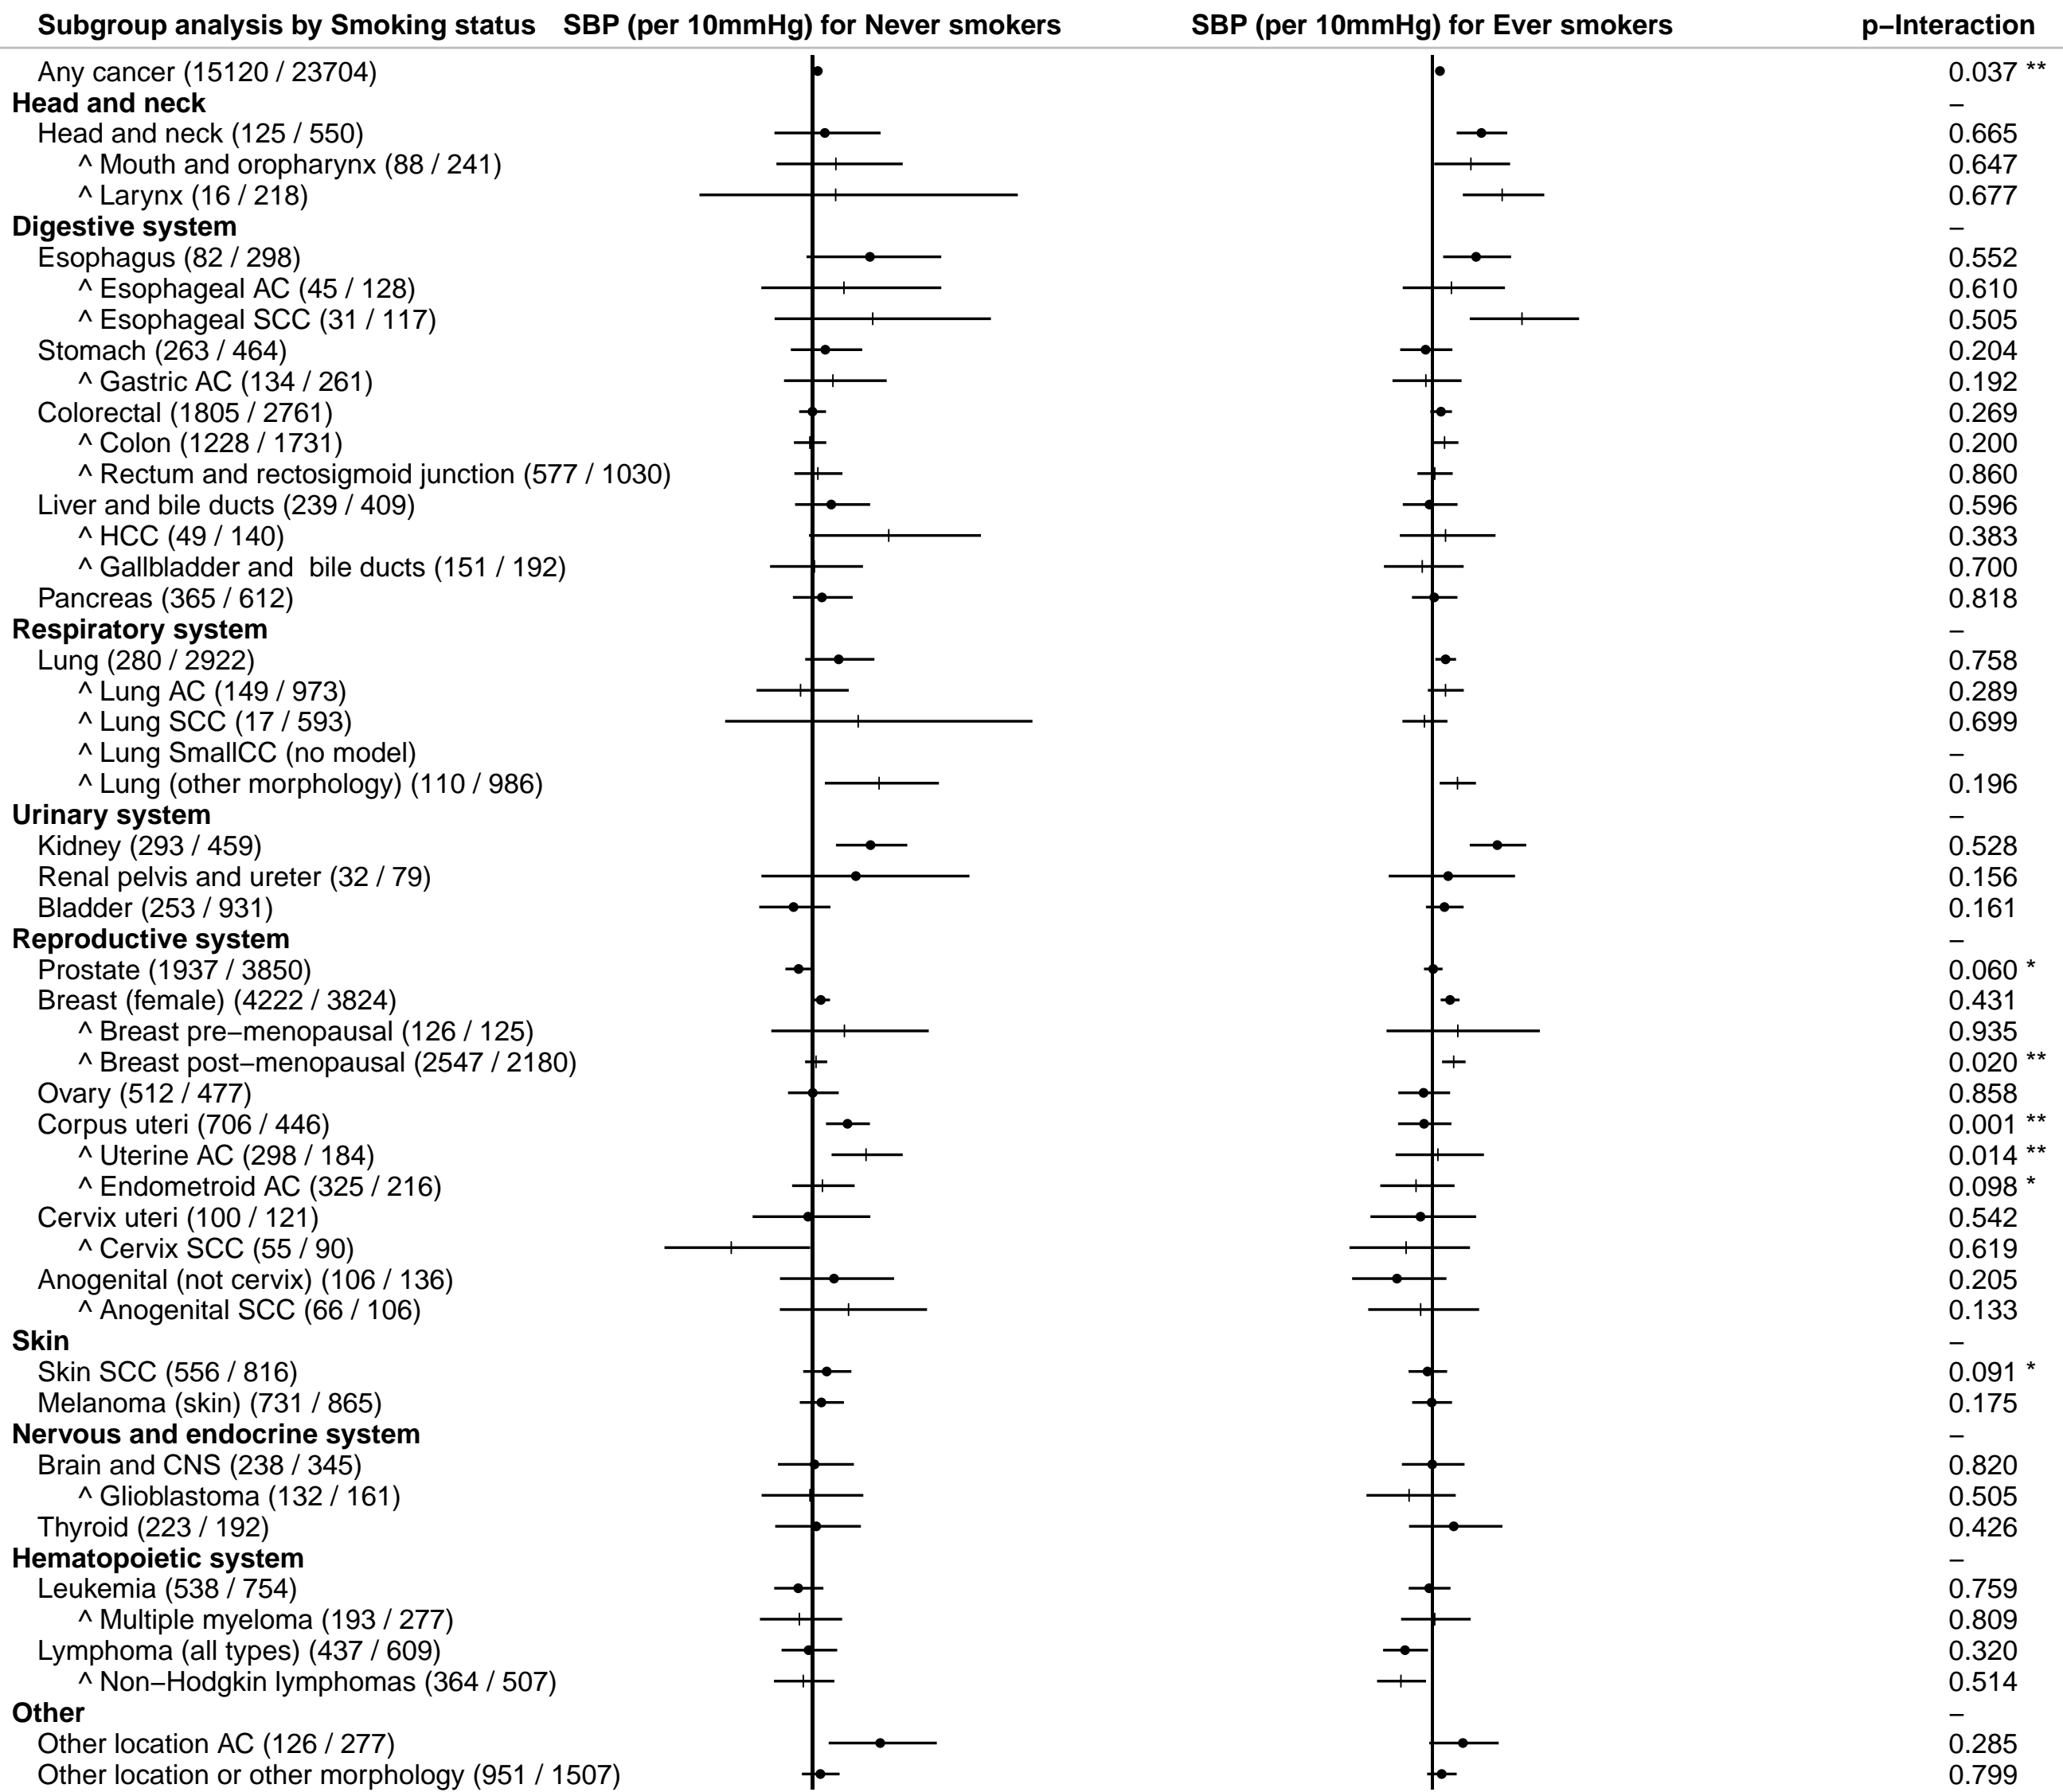

Adjusted hazard ratios (HR) (95% confidence intervals) from Cox proportional hazards models, stratified by age (5-year groups) and study centre and adjusted for confounders; Cancer types (cases per group) are described in Supplementary Table 1; AC adenocarcinoma; CNS central nervous system; HCC hepatocellular carcinoma; SCC squamous cell carcinoma; SmallCC small cell carcinoma; DBP or SBP – diastolic or systolic blood pressure; Treatment – antihypertensive treatment; Interaction p-values from likelihood ratio tests comparing nested models with and without an interaction term (multiplicative scale): \* p<0.1; \*\* p<0.05. Main anatomical sites ordered by body system, as in Figure 2.

Hazard ratio

0.9 1.0 1.1 1.2 1.3 1.4 1.5 1.6

0.9 1.0 1.1 1.2 1.3 1.4 1.5 1.6

**Supplementary Figure 1H: Forest plot of HR (95% CI) for sub-group analyses of continuous SBP and DBP**

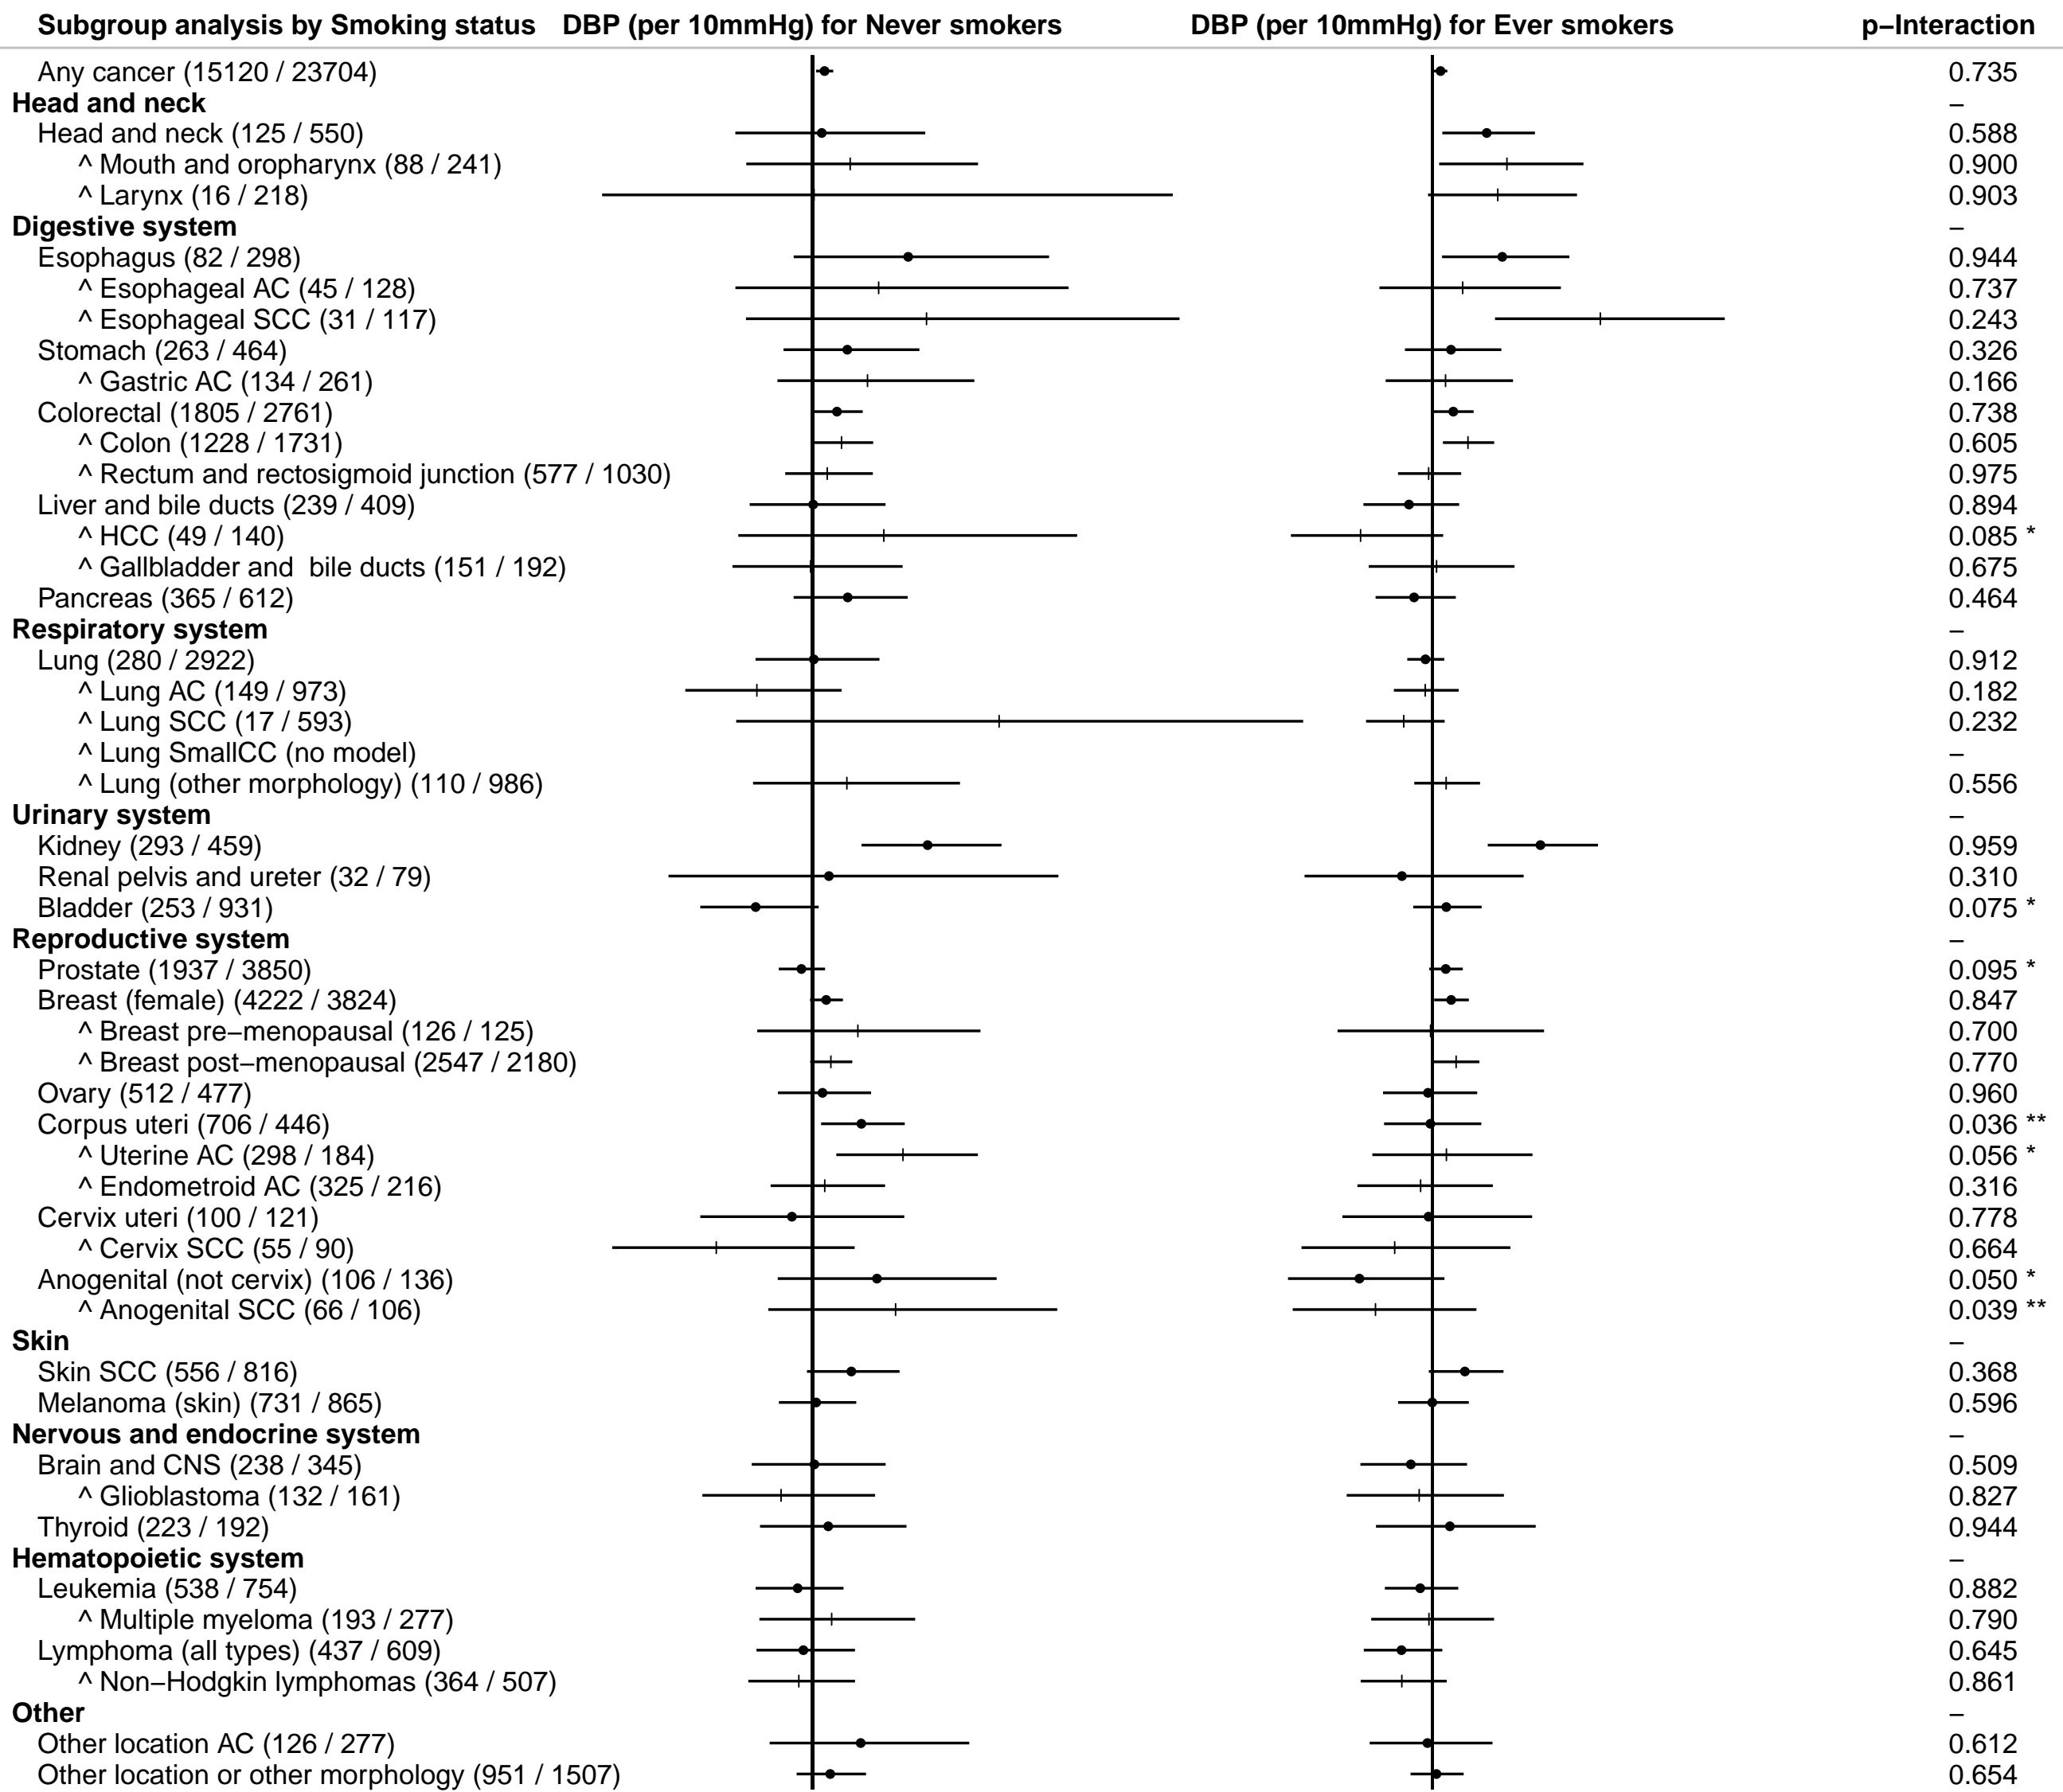

Adjusted hazard ratios (HR) (95% confidence intervals) from Cox proportional hazards models, stratified by age (5-year groups) and study centre and adjusted for confounders; Cancer types (cases per group) are described in Supplementary Table 1; AC adenocarcinoma; CNS central nervous system; HCC hepatocellular carcinoma; SCC squamous cell carcinoma; SmallCC small cell carcinoma; DBP or SBP – diastolic or systolic blood pressure; Treatment – antihypertensive treatment; Interaction p-values from likelihood ratio tests comparing nested models with and without an interaction term (multiplicative scale): \* p<0.1; \*\* p<0.05. Main anatomical sites ordered by body system, as in Figure 2.

Hazard ratio

0.9 1.0 1.1 1.2 1.3 1.4 1.5 1.6

0.9 1.0 1.1 1.2 1.3 1.4 1.5 1.6



**Supplementary Figure 1I: Forest plot of HR (95% CI) for sub-group analyses of continuous SBP and DBP**

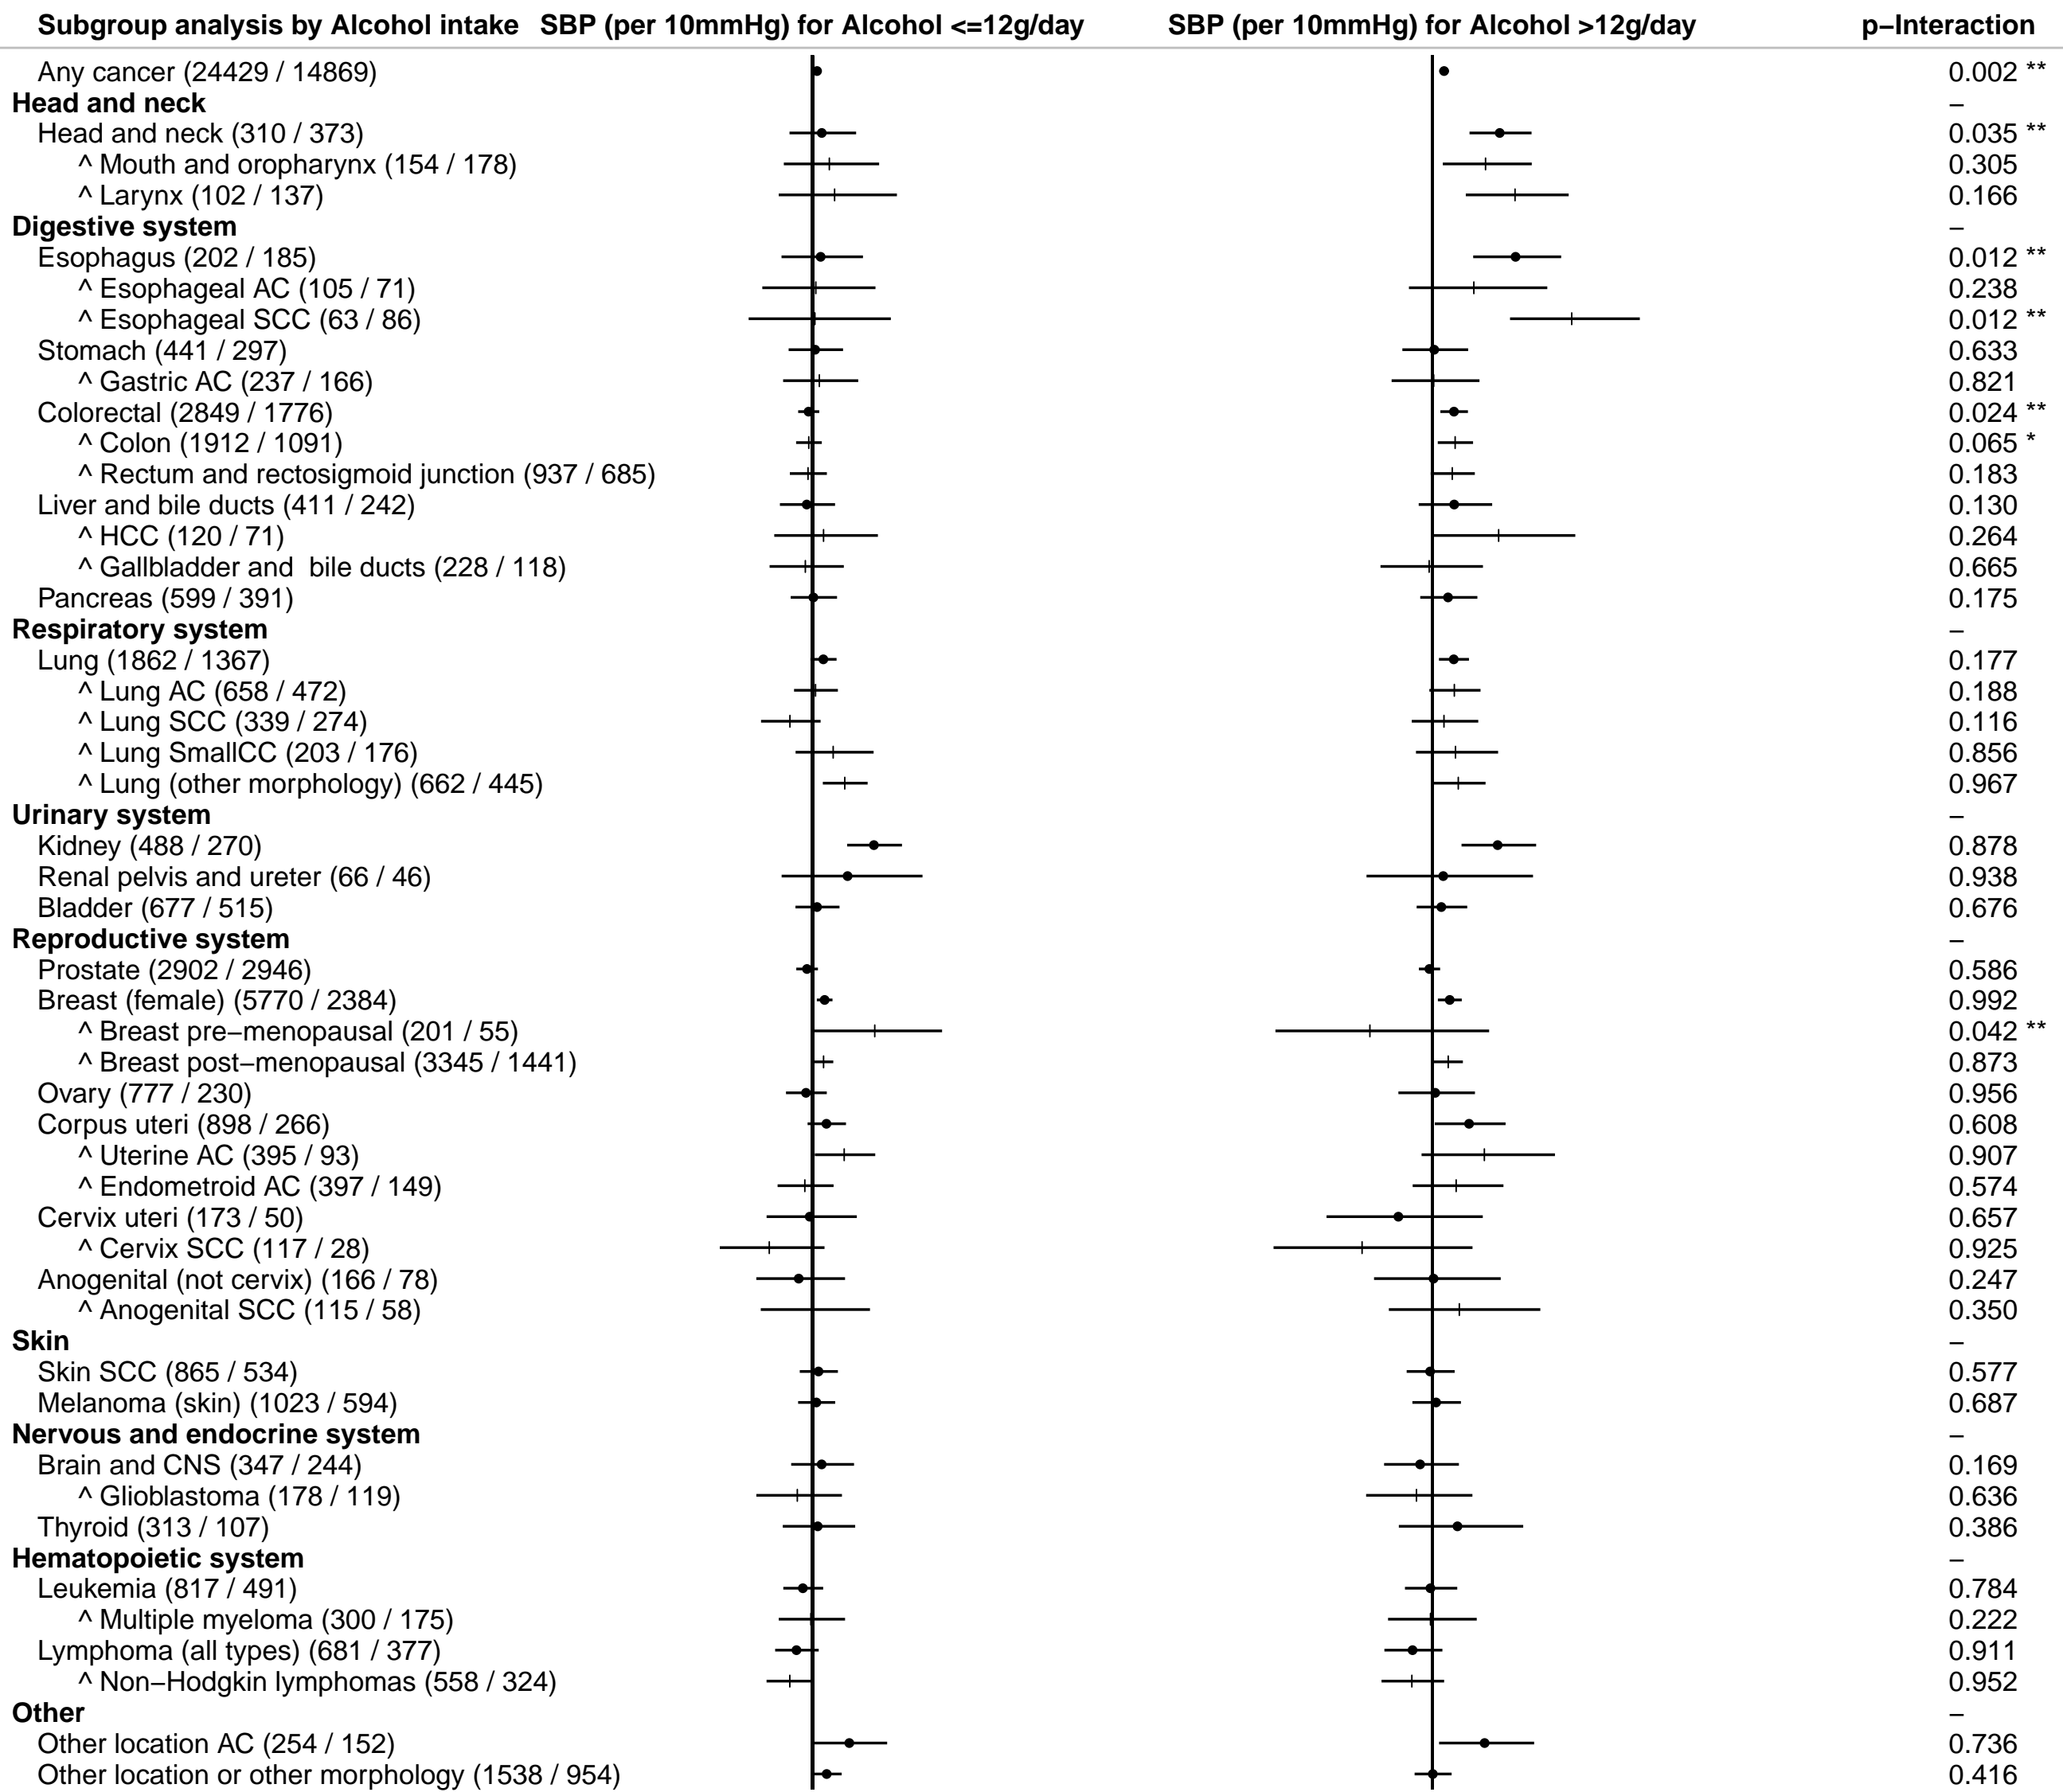

Adjusted hazard ratios (HR) (95% confidence intervals) from Cox proportional hazards models, stratified by age (5-year groups) and study centre and adjusted for confounders; Cancer types (cases per group) are described in Supplementary Table 1; AC adenocarcinoma; CNS central nervous system; HCC hepatocellular carcinoma; SCC squamous cell carcinoma; SmallCC small cell carcinoma; DBP or SBP – diastolic or systolic blood pressure; Treatment – antihypertensive treatment; Interaction p-values from likelihood ratio tests comparing nested models with and without an interaction term (multiplicative scale): \* p<0.1; \*\* p<0.05. Main anatomical sites ordered by body system, as in Figure 2.

Hazard ratio

0.9 1.0 1.1 1.2 1.3 1.4 1.5 1.6

0.9 1.0 1.1 1.2 1.3 1.4 1.5 1.6

**Supplementary Figure 1J: Forest plot of HR (95% CI) for sub-group analyses of continuous SBP and DBP**

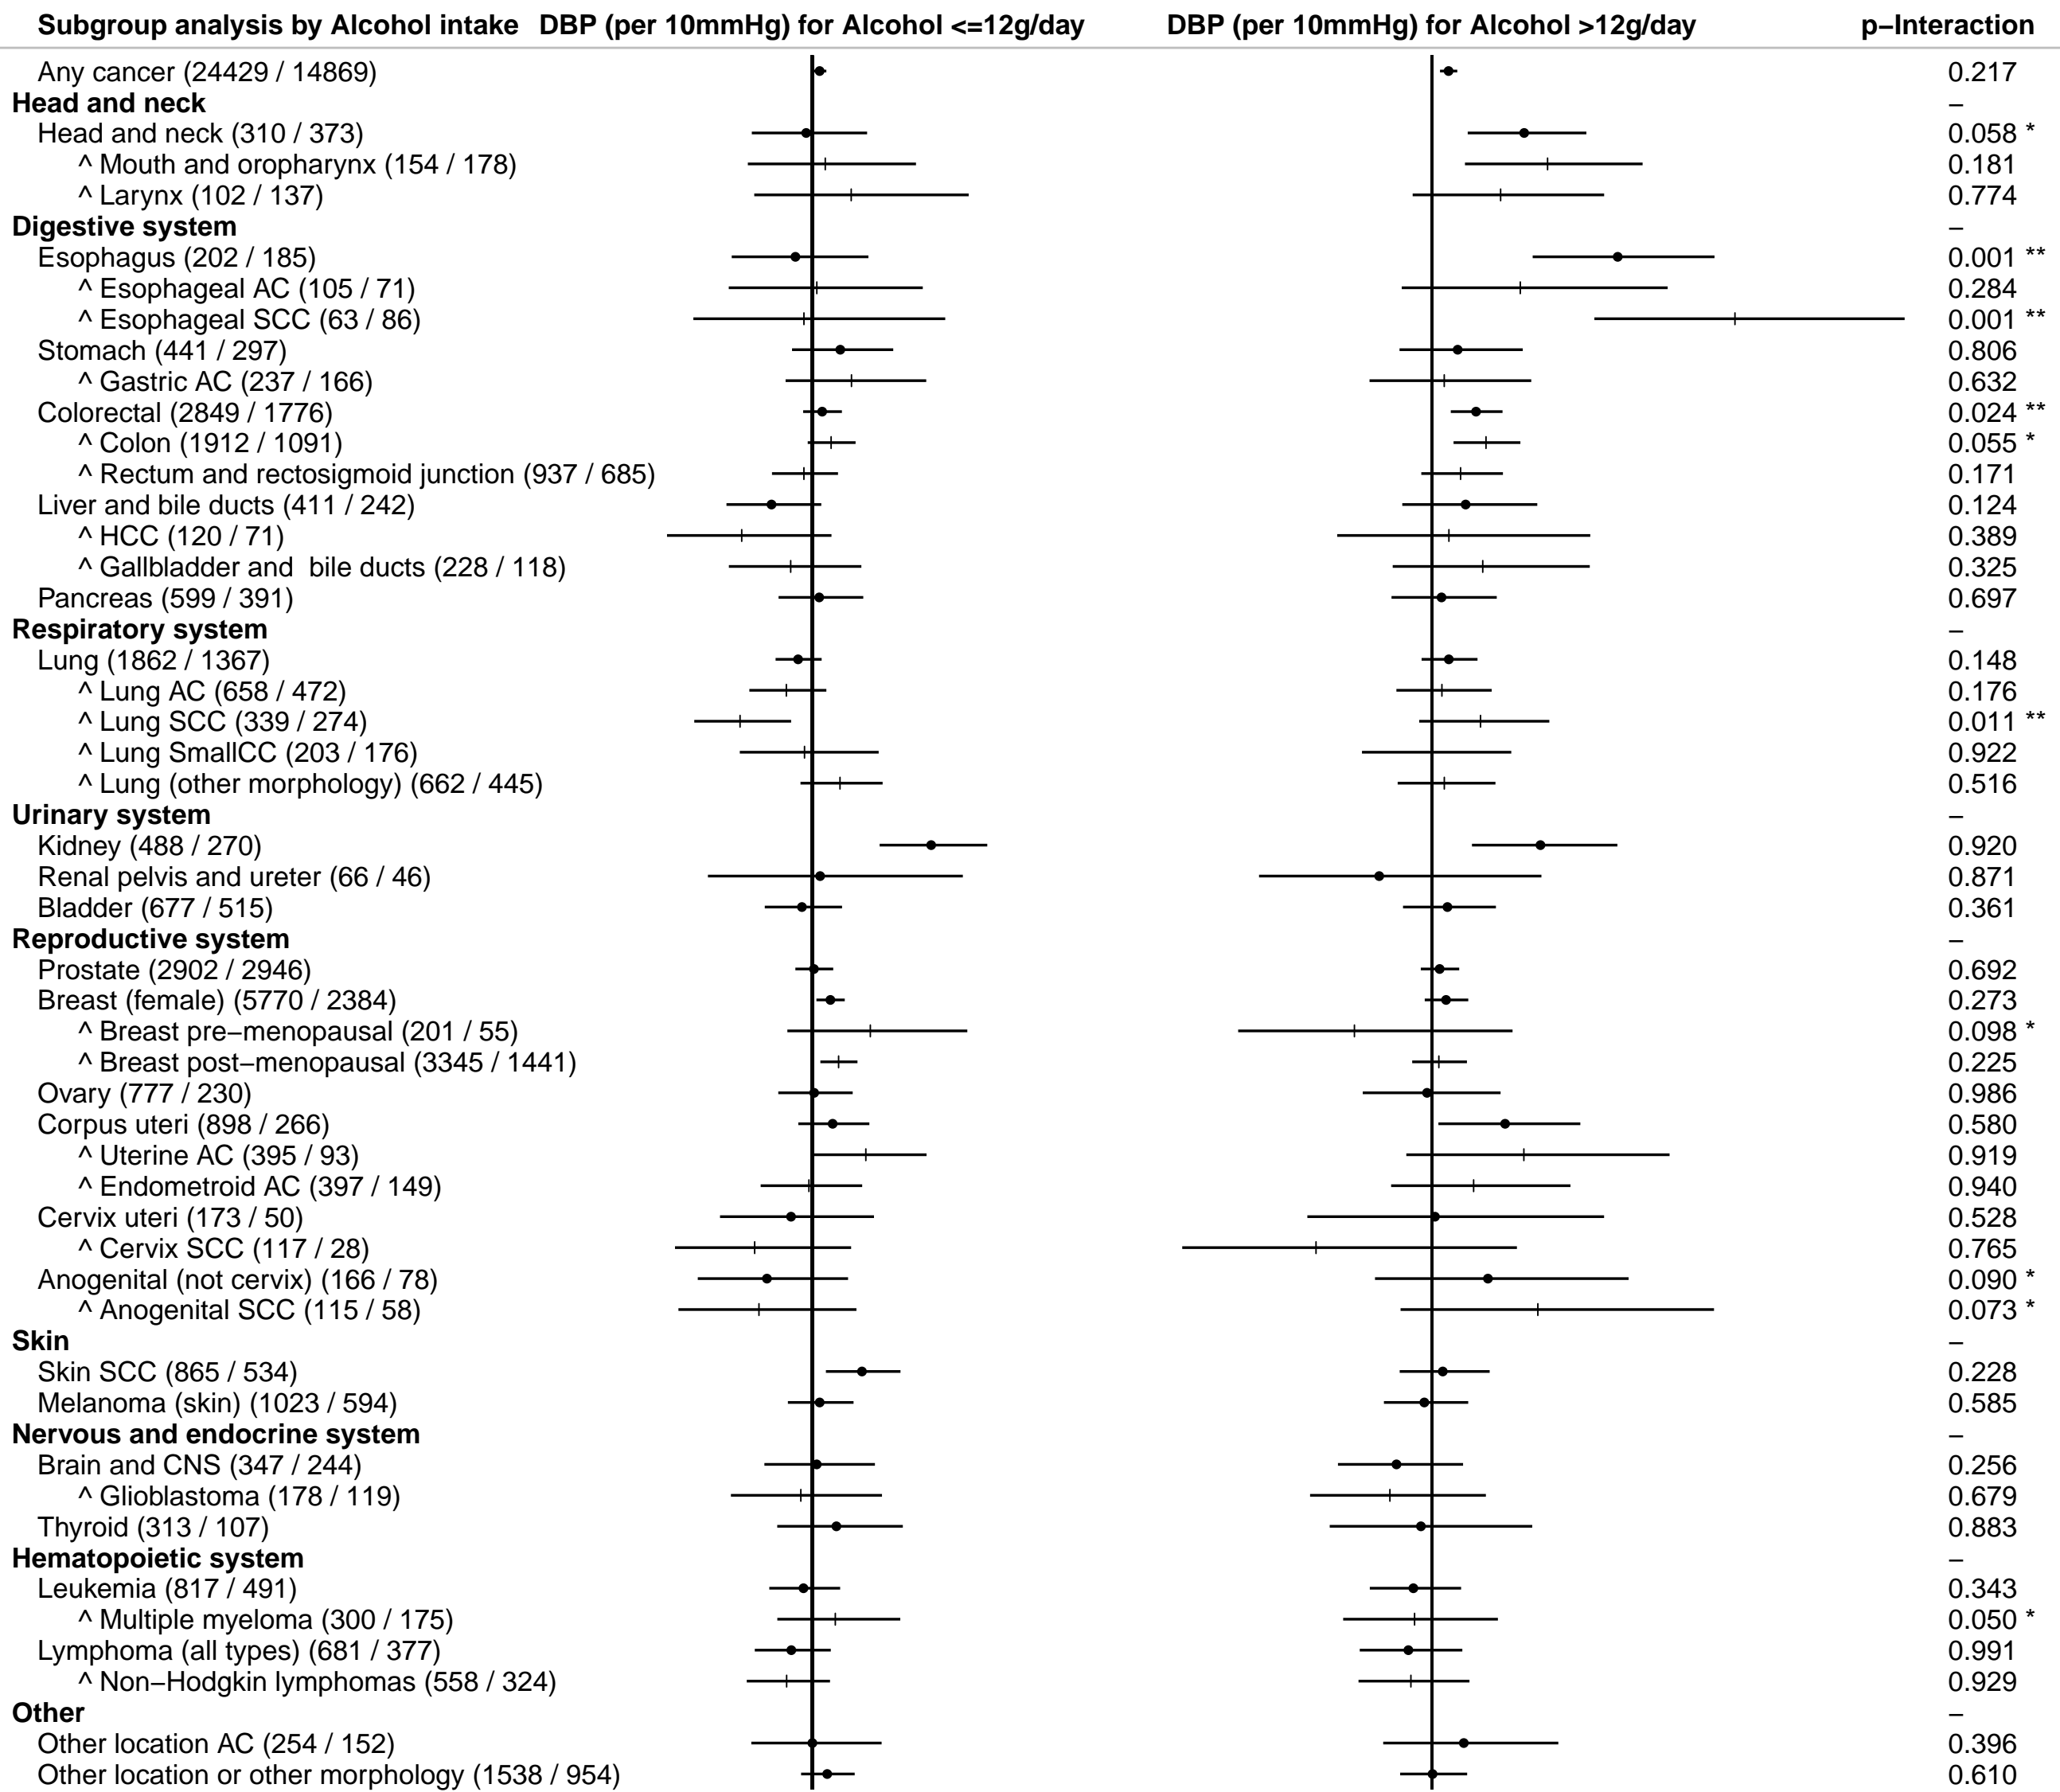

Adjusted hazard ratios (HR) (95% confidence intervals) from Cox proportional hazards models, stratified by age (5-year groups) and study centre and adjusted for confounders; Cancer types (cases per group) are described in Supplementary Table 1; AC adenocarcinoma; CNS central nervous system; HCC hepatocellular carcinoma; SCC squamous cell carcinoma; SmallCC small cell carcinoma; DBP or SBP – diastolic or systolic blood pressure; Treatment – antihypertensive treatment; Interaction p-values from likelihood ratio tests comparing nested models with and without an interaction term (multiplicative scale): \* p<0.1; \*\* p<0.05. Main anatomical sites ordered by body system, as in Figure 2.

Hazard ratio

0.9 1.0 1.1 1.2 1.3 1.4 1.5 1.6

0.9 1.0 1.1 1.2 1.3 1.4 1.5 1.6

Supplementary Figure 1K: Forest plot of HR (95% CI) for sub-group analyses of continuous SBP and DBP

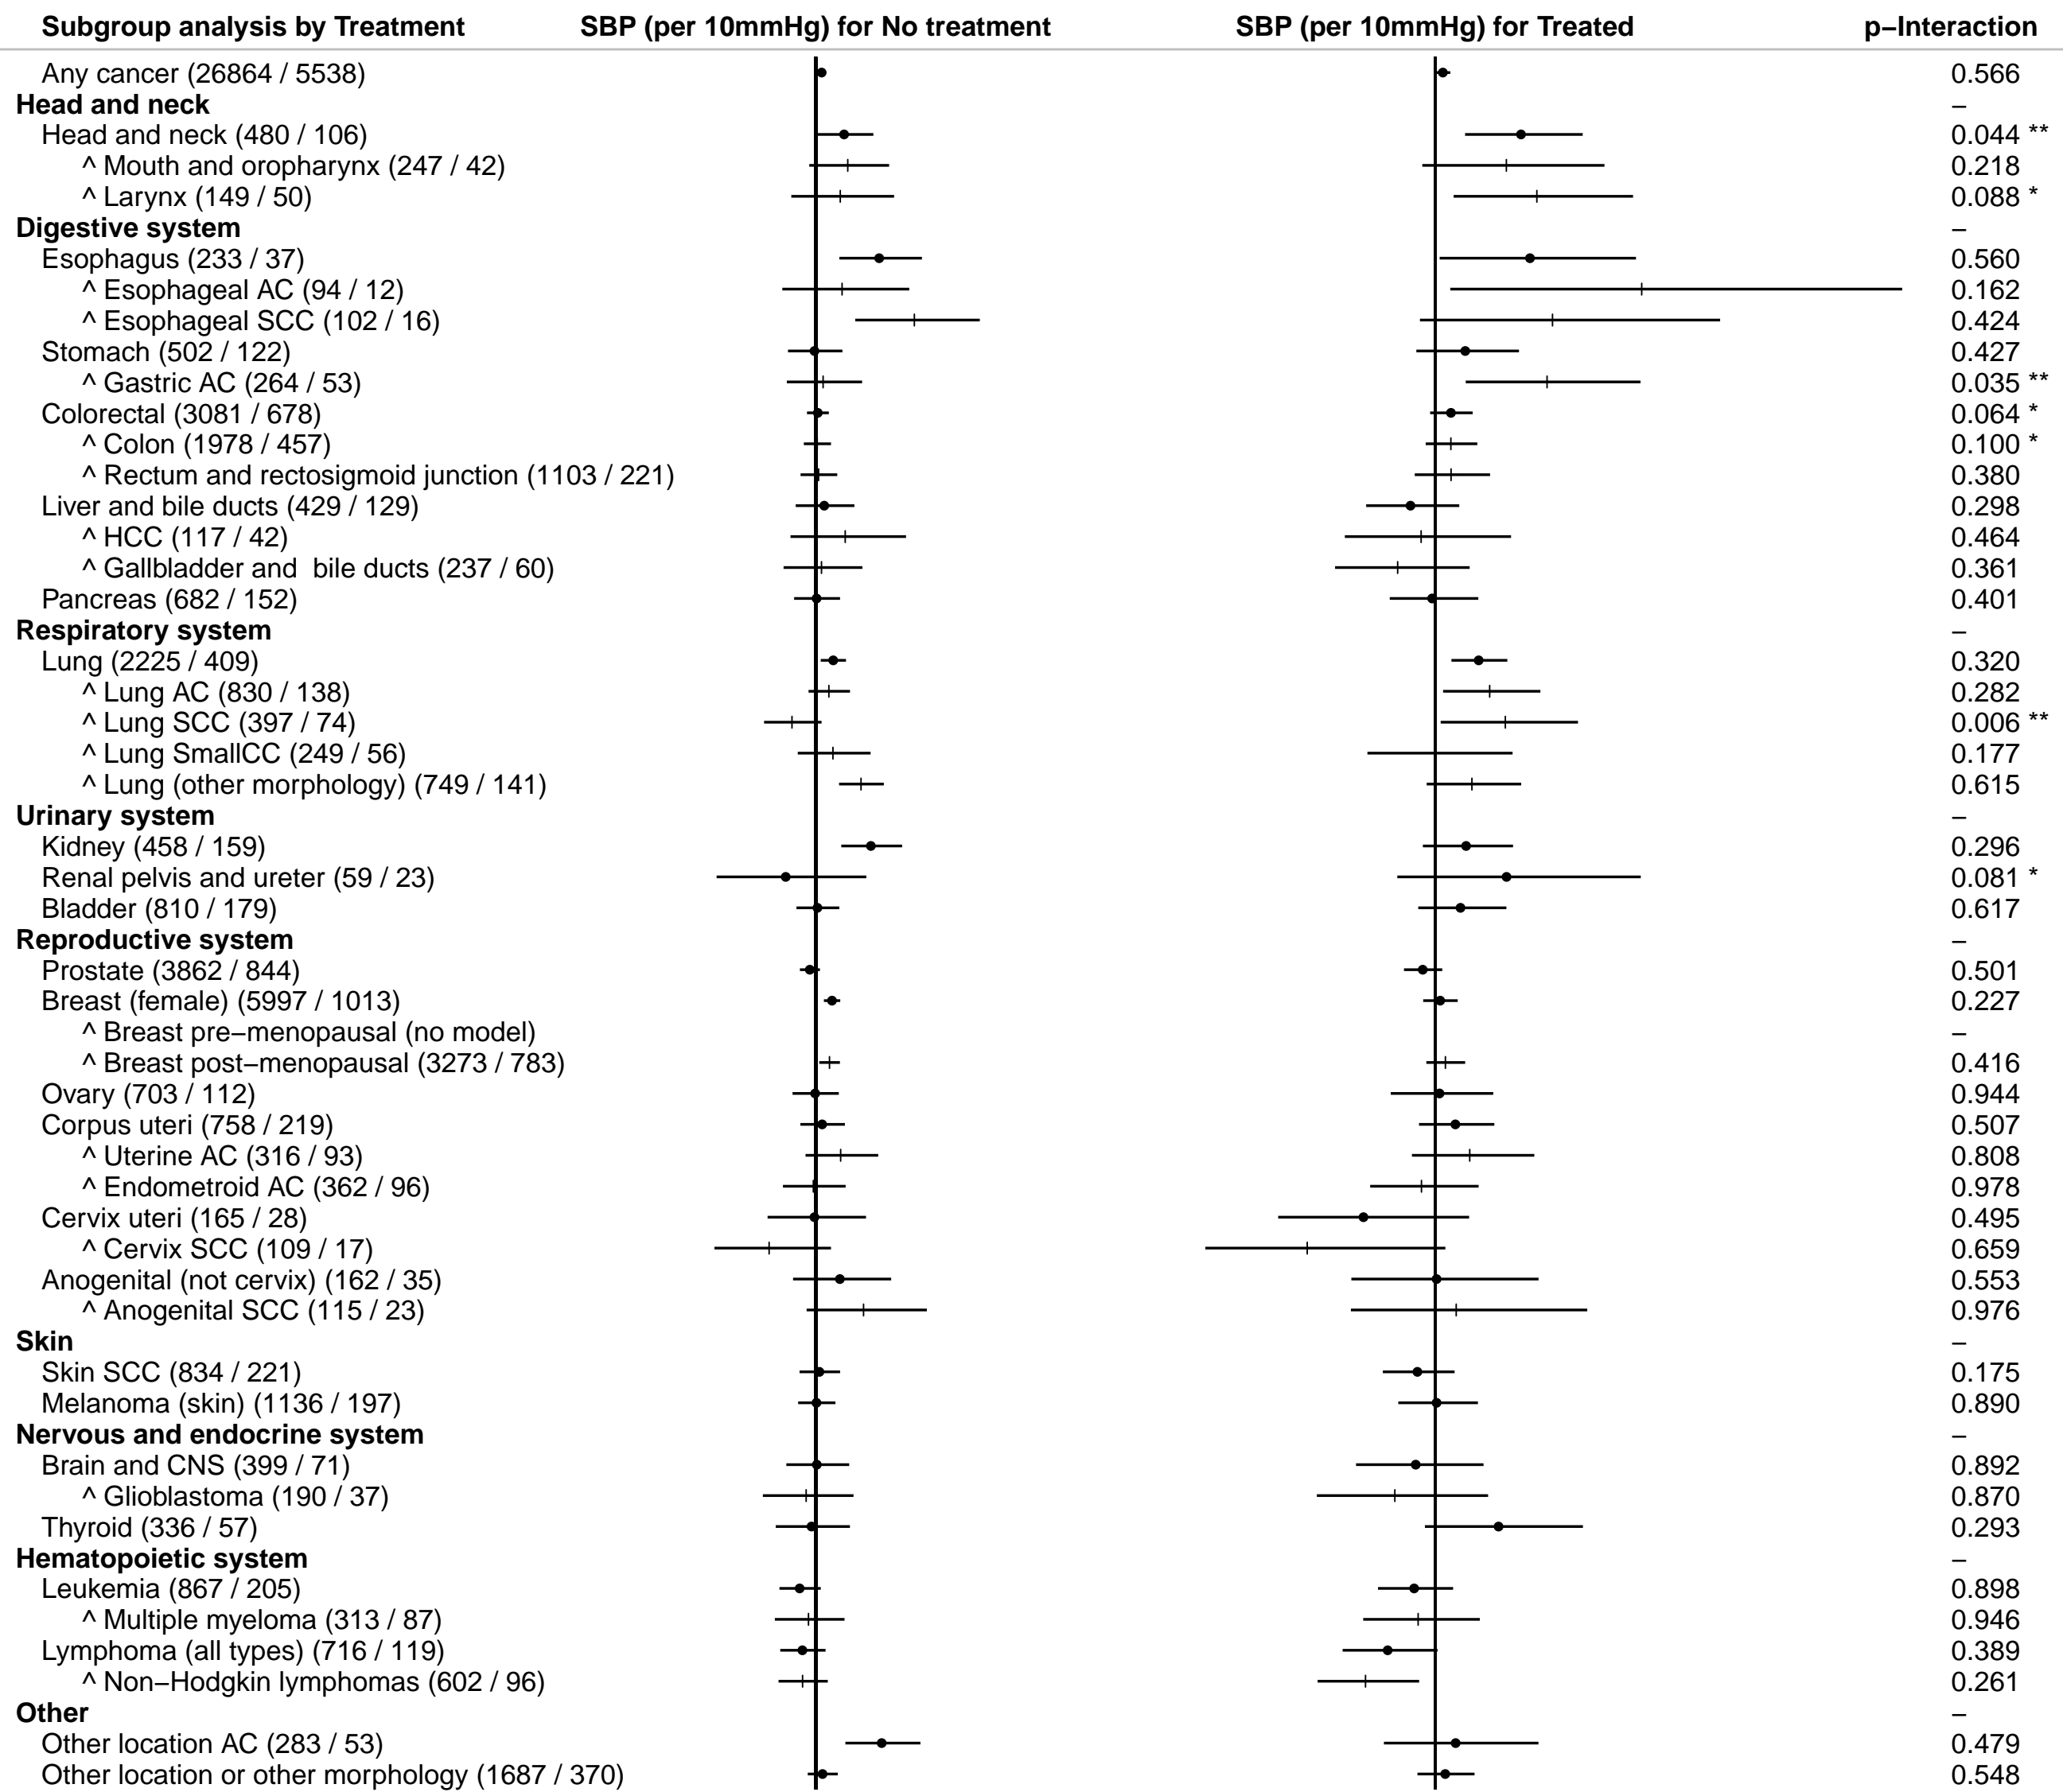

Adjusted hazard ratios (HR) (95% confidence intervals) from Cox proportional hazards models, stratified by age (5-year groups) and study centre and adjusted for confounders; Cancer types (cases per group) are described in Supplementary Table 1; AC adenocarcinoma; CNS central nervous system; HCC hepatocellular carcinoma; SCC squamous cell carcinoma; SmallCC small cell carcinoma; DBP or SBP – diastolic or systolic blood pressure; Treatment – antihypertensive treatment; Interaction p-values from likelihood ratio tests comparing nested models with and without an interaction term (multiplicative scale): \* p<0.1; \*\* p<0.05. Main anatomical sites ordered by body system, as in Figure 2.

Hazard ratio

0.9 1.0 1.1 1.2 1.3 1.4 1.5 1.6

0.9 1.0 1.1 1.2 1.3 1.4 1.5 1.6

Supplementary Figure 1L: Forest plot of HR (95% CI) for sub-group analyses of continuous SBP and DBP

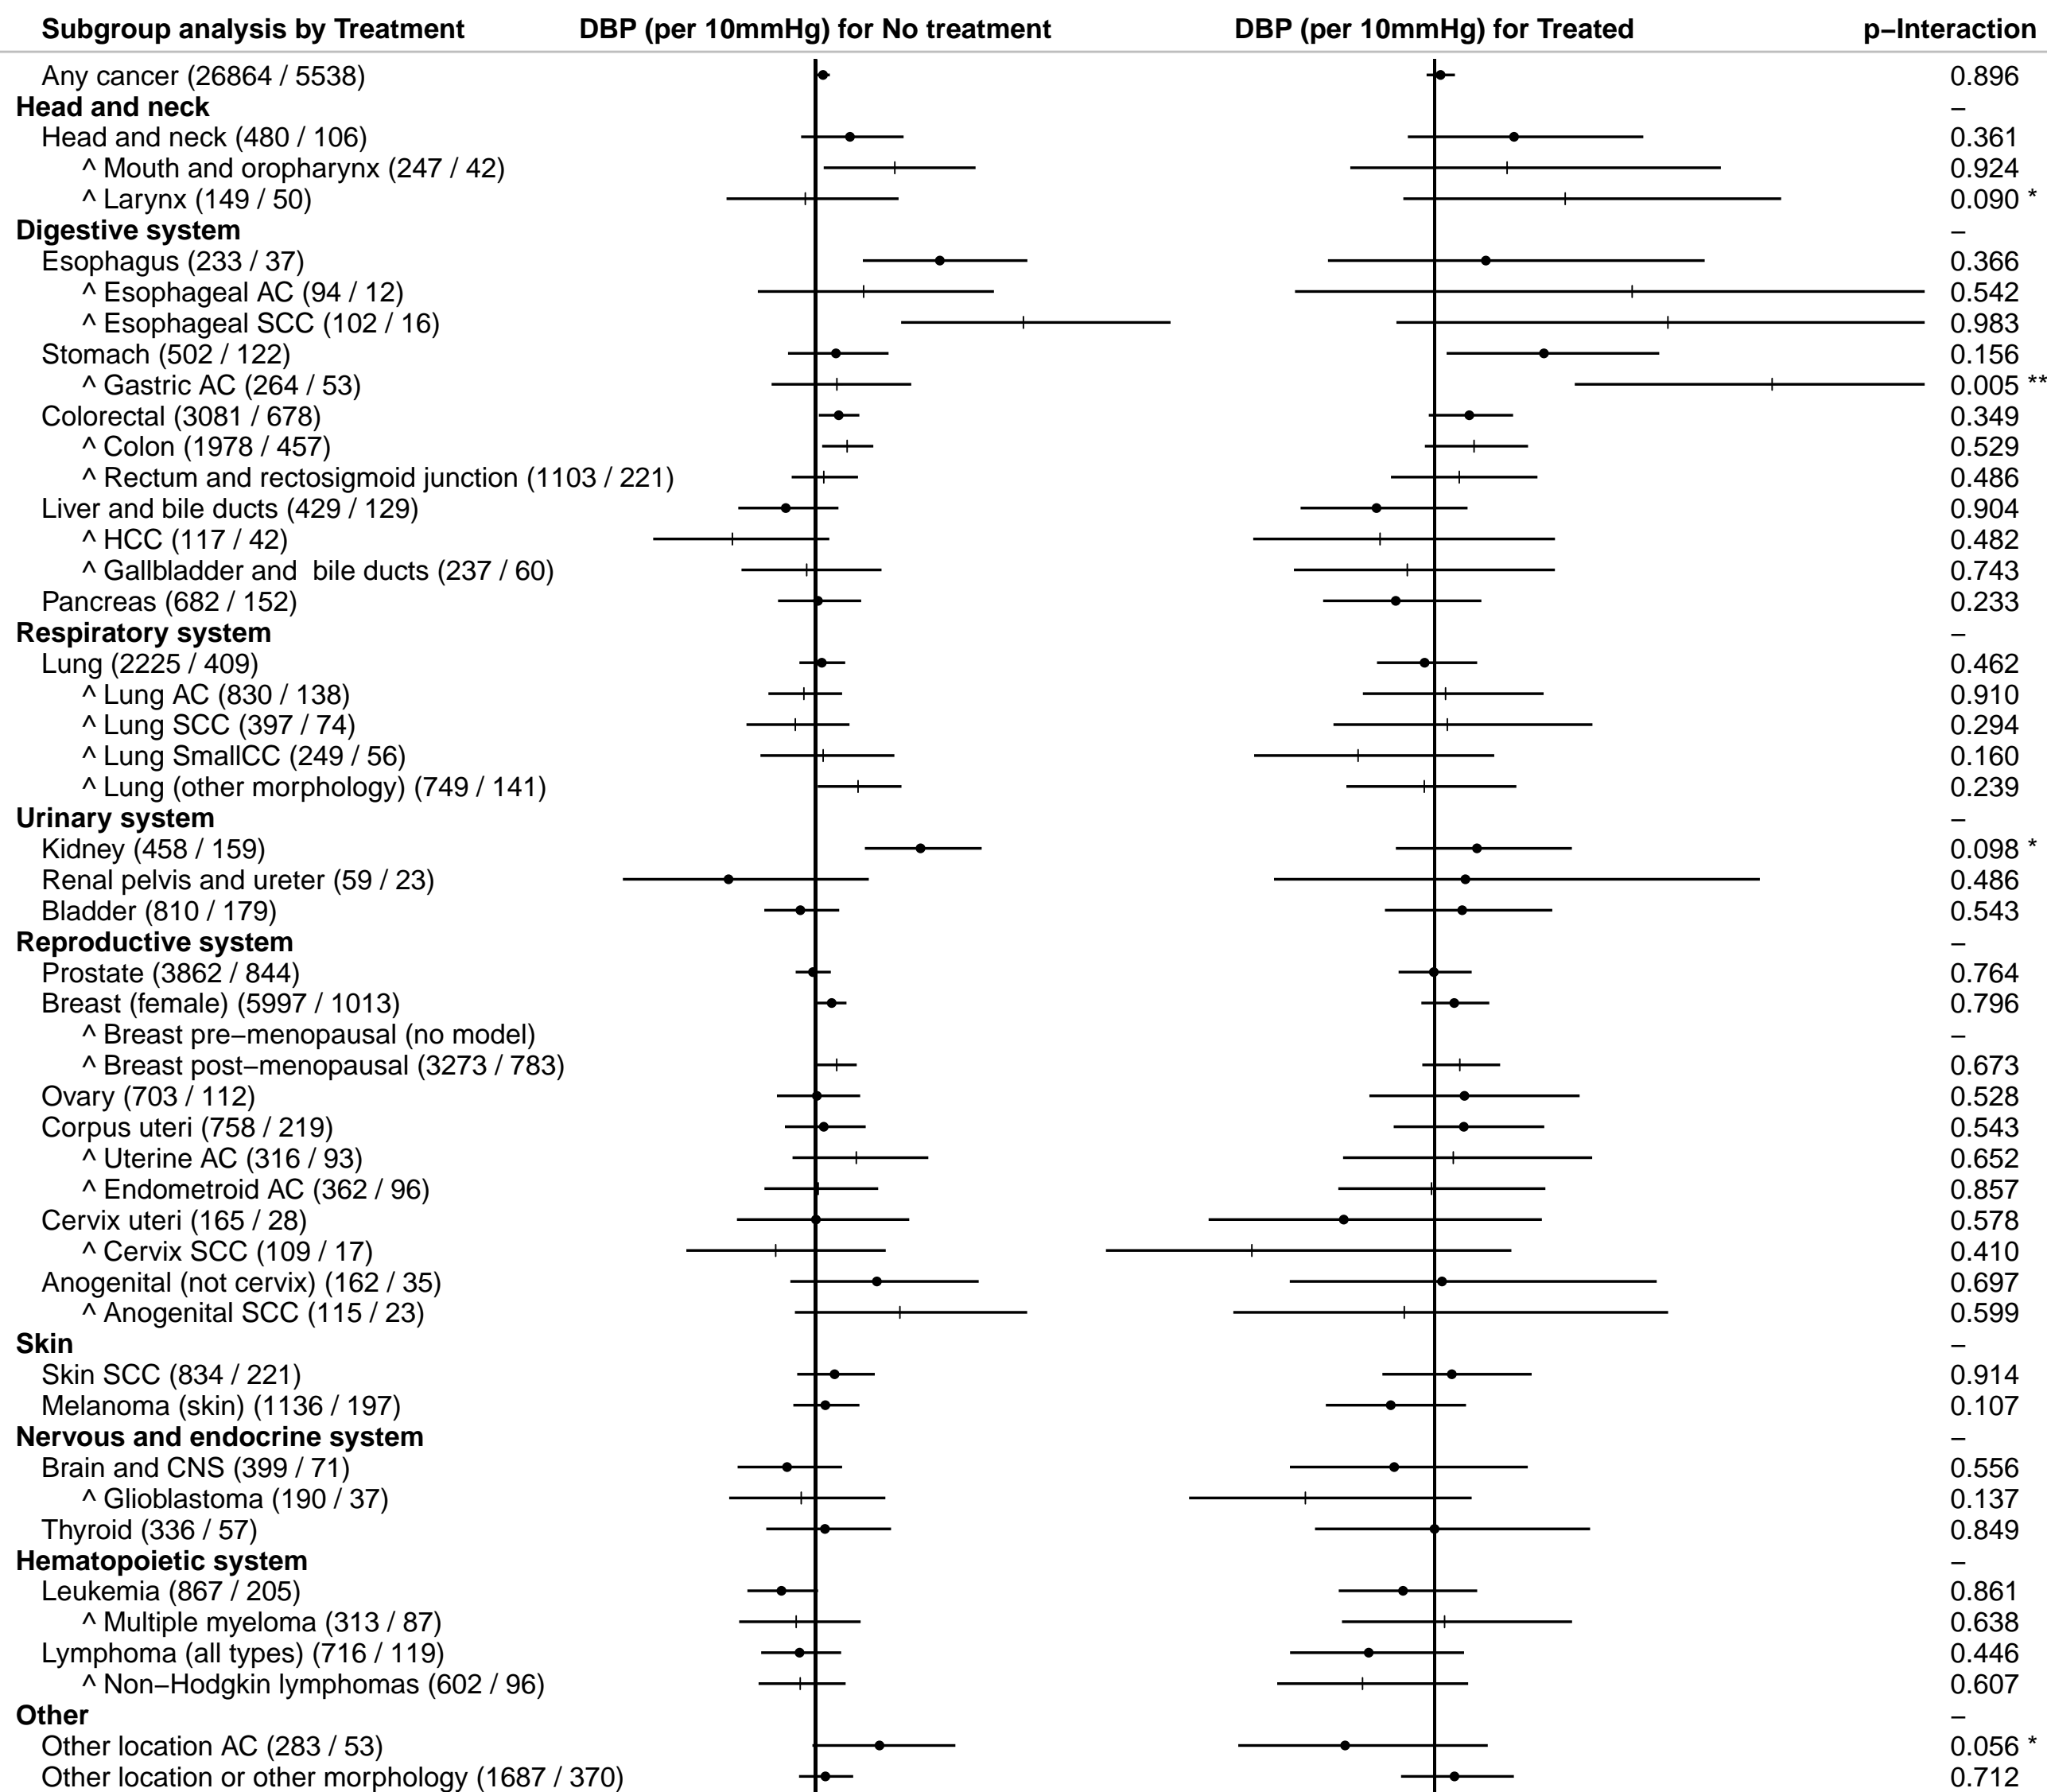

Adjusted hazard ratios (HR) (95% confidence intervals) from Cox proportional hazards models, stratified by age (5-year groups) and study centre and adjusted for confounders; Cancer types (cases per group) are described in Supplementary Table 1; AC adenocarcinoma; CNS central nervous system; HCC hepatocellular carcinoma; SCC squamous cell carcinoma; SmallCC small cell carcinoma; DBP or SBP – diastolic or systolic blood pressure; Treatment – antihypertensive treatment; Interaction p-values from likelihood ratio tests comparing nested models with and without an interaction term (multiplicative scale): \* p<0.1; \*\* p<0.05. Main anatomical sites ordered by body system, as in Figure 2.

Hazard ratio

0.9 1.0 1.1 1.2 1.3 1.4 1.5 1.6

0.9 1.0 1.1 1.2 1.3 1.4 1.5 1.6
