# Supplementary material
Source: PubMed Central journal article supplement (PMC7115826)
Supplement: EMS86622-supplement-Table_S5___Summary_of_statistical_analyses.pdf [file EMS86622-supplement-Table_S5___Summary_of_statistical_analyses.pdf]

## Supplementary Table 5 Summary of statistical analyses

*Christakoudi & Kakourou et al. HT and CA in EPIC*

**AC** - adenocarcinoma

**ASH** - American Society of Hypertension

**CNS** - Central Nervous System

**DBP** - diastolic blood pressure

**HCC** - hepatocellular carcinoma

**HR** - hazard ratio estimates (95% confidence intervals)

**SBP** - systolic blood pressure

**SCC** - squamous cell carcinoma

**SmallCC** - small cell carcinoma

The main anatomical sites are ordered by body system, as in Figure 2 (specific locations and morphologies follow the relevant main anatomical site and other locations are listed last).

Cancer types locations and morphologies are defined in Supplementary Table 1.

Adjustment variables are listed in Supplementary Table 2.

| Any cancer                                                                       |       | Cases  | Cohort              | HR (crude)          | HR (adjusted)       | Excluding first 2 years of follow-up HR (adjusted) | Censoring Kidney cancer HR (adjusted) | Men HR (adjusted)   | Women HR (adjusted) | Sex p-interaction | BMI <= 25 mg/m <sup>2</sup> HR (adjusted) | BMI > 25 mg/m <sup>2</sup> HR (adjusted) | BMI p-interaction |
|----------------------------------------------------------------------------------|-------|--------|---------------------|---------------------|---------------------|----------------------------------------------------|---------------------------------------|---------------------|---------------------|-------------------|-------------------------------------------|------------------------------------------|-------------------|
| Cases                                                                            |       |        |                     | 39298               | 39298               | 35941                                              | 38455                                 | 17452               | 21846               |                   | 17441                                     | 21857                                    |                   |
| Cohort size                                                                      |       |        |                     | 307318              | 307318              | 301857                                             | 307318                                | 112591              | 194727              |                   | 146326                                    | 160992                                   |                   |
| <b>Mean Systolic Blood Pressure continuous (per 10mmHg increase)</b>             |       |        |                     |                     |                     |                                                    |                                       |                     |                     |                   |                                           |                                          |                   |
|                                                                                  | 39298 | 307318 | 1.021 (1.016-1.027) | 1.014 (1.008-1.019) | 1.012 (1.006-1.018) | 1.012 (1.006-1.017)                                | 1.012 (1.003-1.020)                   | 1.020 (1.013-1.028) | 0.0000002           |                   | 1.013 (1.004-1.022)                       | 1.016 (1.009-1.024)                      | 0.12              |
| <b>Mean Diastolic Blood Pressure continuous (per 10mmHg increase)</b>            |       |        |                     |                     |                     |                                                    |                                       |                     |                     |                   |                                           |                                          |                   |
|                                                                                  | 39298 | 307318 | 1.040 (1.030-1.050) | 1.020 (1.010-1.031) | 1.023 (1.012-1.033) | 1.017 (1.006-1.027)                                | 1.015 (1.000-1.030)                   | 1.033 (1.019-1.047) | 0.279               |                   | 1.019 (1.004-1.035)                       | 1.025 (1.012-1.039)                      | 0.401             |
| <b>Mean Blood Pressure (1/3SBP+2/3DBP) continuous (per 10mmHg increase)</b>      |       |        |                     |                     |                     |                                                    |                                       |                     |                     |                   |                                           |                                          |                   |
|                                                                                  | 39298 | 307318 | 1.036 (1.027-1.044) | 1.021 (1.012-1.029) | 1.020 (1.011-1.030) | 1.017 (1.008-1.026)                                | 1.016 (1.003-1.029)                   | 1.032 (1.020-1.044) | 0.0009              |                   | 1.019 (1.006-1.033)                       | 1.025 (1.014-1.036)                      | 0.189             |
| <b>Systolic Blood Pressure (mmHg) ESH classification</b>                         |       |        |                     |                     |                     |                                                    |                                       |                     |                     |                   |                                           |                                          |                   |
| < 120                                                                            | 7588  | 86141  | 1 (referent)        | 1 (referent)        | 1 (referent)        | 1 (referent)                                       | 1 (referent)                          | 1 (referent)        | 1 (referent)        |                   | 1 (referent)                              | 1 (referent)                             |                   |
| 120-129                                                                          | 7451  | 66446  | 1.014 (0.981-1.047) | 0.988 (0.956-1.021) | 0.985 (0.952-1.019) | 0.985 (0.953-1.018)                                | 1.013 (0.959-1.071)                   | 1.010 (0.969-1.052) |                     |                   | 0.999 (0.957-1.044)                       | 0.982 (0.934-1.032)                      |                   |
| 130-139                                                                          | 7789  | 57482  | 1.070 (1.036-1.106) | 1.031 (0.998-1.066) | 1.021 (0.986-1.057) | 1.026 (0.992-1.061)                                | 1.031 (0.976-1.089)                   | 1.078 (1.033-1.125) |                     |                   | 1.030 (0.983-1.078)                       | 1.039 (0.990-1.090)                      |                   |
| 140-159                                                                          | 11003 | 68235  | 1.073 (1.041-1.107) | 1.027 (0.995-1.060) | 1.023 (0.990-1.058) | 1.019 (0.987-1.053)                                | 1.025 (0.973-1.080)                   | 1.069 (1.025-1.114) | 0.0000001           |                   | 1.019 (0.974-1.067)                       | 1.041 (0.994-1.091)                      | 0.08              |
| 160-179                                                                          | 4136  | 22656  | 1.105 (1.062-1.151) | 1.057 (1.014-1.101) | 1.046 (1.002-1.092) | 1.044 (1.001-1.088)                                | 1.044 (0.979-1.113)                   | 1.106 (1.047-1.169) |                     |                   | 1.080 (1.012-1.152)                       | 1.058 (1.001-1.118)                      |                   |
| >= 180                                                                           | 1331  | 6358   | 1.243 (1.170-1.320) | 1.175 (1.106-1.249) | 1.164 (1.092-1.241) | 1.158 (1.089-1.232)                                | 1.177 (1.076-1.287)                   | 1.219 (1.120-1.328) |                     |                   | 1.189 (1.069-1.322)                       | 1.182 (1.095-1.277)                      |                   |
| p-trend                                                                          |       |        | 2E-14               | 0.000003            | 0.00005             | 0.00007                                            | 0.012                                 | 0.0000009           |                     |                   | 0.004                                     | 0.00001                                  |                   |
| <b>Diastolic Blood Pressure (mmHg) ESH classification</b>                        |       |        |                     |                     |                     |                                                    |                                       |                     |                     |                   |                                           |                                          |                   |
| < 80                                                                             | 14454 | 132590 | 1 (referent)        | 1 (referent)        | 1 (referent)        | 1 (referent)                                       | 1 (referent)                          | 1 (referent)        |                     |                   | 1 (referent)                              | 1 (referent)                             |                   |
| 80-84                                                                            | 8211  | 64872  | 0.990 (0.963-1.018) | 0.971 (0.945-0.999) | 0.973 (0.946-1.002) | 0.970 (0.943-0.997)                                | 0.965 (0.924-1.007)                   | 0.990 (0.955-1.027) |                     |                   | 0.953 (0.916-0.993)                       | 0.989 (0.952-1.028)                      |                   |
| 85-89                                                                            | 5905  | 41500  | 1.038 (1.007-1.070) | 1.009 (0.978-1.041) | 1.014 (0.981-1.047) | 1.009 (0.977-1.041)                                | 0.993 (0.947-1.040)                   | 1.035 (0.993-1.080) |                     |                   | 1.044 (0.996-1.095)                       | 0.994 (0.953-1.036)                      |                   |
| 90-99                                                                            | 7786  | 51196  | 1.059 (1.029-1.089) | 1.016 (0.986-1.046) | 1.018 (0.988-1.050) | 1.009 (0.979-1.039)                                | 0.980 (0.939-1.023)                   | 1.064 (1.022-1.108) | 0.951               |                   | 1.018 (0.972-1.066)                       | 1.022 (0.983-1.061)                      | 0.812             |
| 100-109                                                                          | 2394  | 13896  | 1.172 (1.121-1.224) | 1.102 (1.054-1.153) | 1.107 (1.056-1.160) | 1.089 (1.041-1.140)                                | 1.039 (0.977-1.106)                   | 1.193 (1.117-1.275) |                     |                   | 1.087 (1.002-1.179)                       | 1.120 (1.061-1.183)                      |                   |
| >= 110                                                                           | 548   | 3264   | 1.198 (1.100-1.305) | 1.108 (1.016-1.207) | 1.127 (1.031-1.233) | 1.087 (0.995-1.187)                                | 1.078 (0.966-1.203)                   | 1.136 (0.987-1.308) |                     |                   | 1.269 (1.071-1.502)                       | 1.079 (0.976-1.193)                      |                   |
| p-trend                                                                          |       |        | 9E-15               | 0.0001              | 0.00005             | 0.001                                              | 0.335                                 | 0.0000001           |                     |                   | 0.006                                     | 0.0007                                   |                   |
| <b>Systolic Blood Pressure (mmHg) ASH classification</b>                         |       |        |                     |                     |                     |                                                    |                                       |                     |                     |                   |                                           |                                          |                   |
| < 120                                                                            | 7588  | 86141  | 1 (referent)        | 1 (referent)        | 1 (referent)        | 1 (referent)                                       | 1 (referent)                          | 1 (referent)        |                     |                   | 1 (referent)                              | 1 (referent)                             |                   |
| 120-139                                                                          | 15240 | 123928 | 1.041 (1.012-1.071) | 1.008 (0.980-1.038) | 1.002 (0.972-1.033) | 1.005 (0.976-1.034)                                | 1.022 (0.973-1.074)                   | 1.040 (1.004-1.078) |                     |                   | 1.013 (0.975-1.052)                       | 1.011 (0.968-1.057)                      |                   |
| 140-159                                                                          | 11003 | 68235  | 1.071 (1.039-1.105) | 1.025 (0.992-1.058) | 1.022 (0.988-1.056) | 1.017 (0.985-1.050)                                | 1.024 (0.972-1.079)                   | 1.066 (1.022-1.111) | 0.0000001           |                   | 1.018 (0.972-1.065)                       | 1.039 (0.992-1.088)                      | 0.166             |
| >= 160                                                                           | 5467  | 29014  | 1.133 (1.092-1.176) | 1.080 (1.040-1.122) | 1.069 (1.027-1.113) | 1.066 (1.026-1.109)                                | 1.072 (1.009-1.138)                   | 1.127 (1.071-1.186) |                     |                   | 1.101 (1.037-1.169)                       | 1.084 (1.028-1.142)                      |                   |
| p-trend                                                                          |       |        | 2E-11               | 0.0001              | 0.0007              | 0.002                                              | 0.036                                 | 0.000005            |                     |                   | 0.01                                      | 0.0005                                   |                   |
| <b>Diastolic Blood Pressure (mmHg) ASH classification</b>                        |       |        |                     |                     |                     |                                                    |                                       |                     |                     |                   |                                           |                                          |                   |
| < 80                                                                             | 14454 | 132590 | 1 (referent)        | 1 (referent)        | 1 (referent)        | 1 (referent)                                       | 1 (referent)                          | 1 (referent)        |                     |                   | 1 (referent)                              | 1 (referent)                             |                   |
| 80-89                                                                            | 14116 | 106372 | 1.010 (0.986-1.034) | 0.987 (0.963-1.011) | 0.990 (0.965-1.015) | 0.985 (0.962-1.009)                                | 0.976 (0.940-1.014)                   | 1.008 (0.977-1.040) |                     |                   | 0.987 (0.954-1.022)                       | 0.991 (0.958-1.025)                      |                   |
| 90-99                                                                            | 7786  | 51196  | 1.059 (1.029-1.089) | 1.015 (0.986-1.045) | 1.018 (0.987-1.049) | 1.008 (0.979-1.038)                                | 0.980 (0.938-1.023)                   | 1.064 (1.022-1.107) | 0.923               |                   | 1.018 (0.972-1.066)                       | 1.021 (0.983-1.061)                      | 0.321             |
| >= 100                                                                           | 2942  | 17160  | 1.176 (1.130-1.225) | 1.102 (1.058-1.149) | 1.110 (1.063-1.159) | 1.088 (1.043-1.134)                                | 1.047 (0.988-1.108)                   | 1.183 (1.113-1.258) |                     |                   | 1.114 (1.034-1.200)                       | 1.112 (1.057-1.169)                      |                   |
| p-trend                                                                          |       |        | 1E-13               | 0.0004              | 0.0002              | 0.005                                              | 0.448                                 | 0.0000004           |                     |                   | 0.056                                     | 0.0003                                   |                   |
| <b>Mean BP (mmHg) (1/3SBP+2/3DBP) Cohort-specific quartiles</b>                  |       |        |                     |                     |                     |                                                    |                                       |                     |                     |                   |                                           |                                          |                   |
| 50.0-88.3                                                                        | 7046  | 76991  | 1 (referent)        | 1 (referent)        | 1 (referent)        | 1 (referent)                                       | 1 (referent)                          | 1 (referent)        |                     |                   | 1 (referent)                              | 1 (referent)                             |                   |
| 88.5-96.6                                                                        | 9002  | 77727  | 1.020 (0.988-1.053) | 0.998 (0.966-1.030) | 0.995 (0.962-1.029) | 0.994 (0.963-1.027)                                | 0.999 (0.945-1.055)                   | 1.026 (0.986-1.067) |                     |                   | 0.993 (0.952-1.036)                       | 1.008 (0.959-1.059)                      |                   |
| 96.8-105.5                                                                       | 10476 | 76327  | 1.044 (1.012-1.077) | 1.007 (0.976-1.040) | 1.007 (0.974-1.041) | 1.001 (0.969-1.034)                                | 0.998 (0.945-1.053)                   | 1.048 (1.006-1.091) | 0.015               |                   | 1.018 (0.975-1.063)                       | 1.008 (0.960-1.057)                      | 0.367             |
| 105.6-216.6                                                                      | 12774 | 76273  | 1.108 (1.074-1.143) | 1.051 (1.018-1.085) | 1.047 (1.012-1.082) | 1.040 (1.007-1.074)                                | 1.018 (0.966-1.074)                   | 1.114 (1.068-1.161) |                     |                   | 1.057 (1.010-1.107)                       | 1.059 (1.010-1.110)                      |                   |
| p-trend                                                                          |       |        | 1E-12               | 0.0005              | 0.002               | 0.005                                              | 0.357                                 | 0.0000002           |                     |                   | 0.01                                      | 0.003                                    |                   |
| <b>Hypertension (SBP &gt;= 140 mmHg, or DBP &gt;= 90 mmHg, or self-reported)</b> |       |        |                     |                     |                     |                                                    |                                       |                     |                     |                   |                                           |                                          |                   |
| Normotensive                                                                     | 18924 | 174179 | 1 (referent)        | 1 (referent)        | 1 (referent)        | 1 (referent)                                       | 1 (referent)                          | 1 (referent)        |                     |                   | 1 (referent)                              | 1 (referent)                             |                   |
| Hypertensive                                                                     | 20374 | 133139 | 1.050 (1.028-1.072) | 1.029 (1.007-1.051) | 1.027 (1.004-1.050) | 1.023 (1.001-1.045)                                | 1.016 (0.984-1.049)                   | 1.049 (1.019-1.080) | 0.0003              |                   | 1.020 (0.988-1.053)                       | 1.045 (1.016-1.075)                      | 0.051             |



| Head and neck                                                                    |        | Excluding first 2 years of follow-up |                     |                     | Men                 | Women               | Sex                 | BMI <= 25 mg/m <sup>2</sup> | BMI > 25 mg/m <sup>2</sup> | BMI                 | Age <= 53 yrs |                     |
|----------------------------------------------------------------------------------|--------|--------------------------------------|---------------------|---------------------|---------------------|---------------------|---------------------|-----------------------------|----------------------------|---------------------|---------------|---------------------|
| Cases                                                                            | Cohort | HR (crude)                           | HR (adjusted)       | HR (adjusted)       | HR (adjusted)       | HR (adjusted)       | p-interaction       | HR (adjusted)               | HR (adjusted)              | p-interaction       | HR (adjusted) |                     |
| Cases                                                                            |        | 683                                  | 683                 | 609                 | 476                 | 207                 |                     | 303                         | 380                        |                     | 242           |                     |
| Cohort size                                                                      |        | 307318                               | 307318              | 301857              | 112591              | 194727              |                     | 146326                      | 160992                     |                     | 153303        |                     |
| <b>Mean Systolic Blood Pressure continuous (per 10mmHg increase)</b>             | 683    | 307318                               | 1.107 (1.065-1.150) | 1.079 (1.037-1.124) | 1.086 (1.040-1.133) | 1.083 (1.031-1.138) | 1.069 (0.995-1.148) | 0.811                       | 1.113 (1.049-1.182)        | 1.045 (0.990-1.104) | 0.356         | 1.019 (0.941-1.103) |
| <b>Mean Diastolic Blood Pressure continuous (per 10mmHg increase)</b>            | 683    | 307318                               | 1.160 (1.083-1.243) | 1.090 (1.013-1.173) | 1.120 (1.037-1.210) | 1.068 (0.978-1.167) | 1.148 (1.005-1.311) | 0.129                       | 1.093 (0.978-1.222)        | 1.073 (0.975-1.181) | 0.876         | 0.980 (0.860-1.117) |
| <b>Mean Blood Pressure (1/3SBP+2/3DBP) continuous (per 10mmHg increase)</b>      | 683    | 307318                               | 1.161 (1.095-1.231) | 1.107 (1.040-1.178) | 1.127 (1.055-1.203) | 1.098 (1.018-1.184) | 1.126 (1.007-1.259) | 0.327                       | 1.136 (1.034-1.247)        | 1.071 (0.986-1.163) | 0.571         | 1.003 (0.893-1.126) |
| <b>Systolic Blood Pressure (mmHg) ESH classification</b>                         |        |                                      |                     |                     |                     |                     |                     |                             |                            |                     |               |                     |
| < 120                                                                            | 105    | 86141                                | 1 (referent)        |                             | 1 (referent)               | 1 (referent)        |               | 1 (referent)        |
| 120-129                                                                          | 125    | 66446                                | 1.26 (0.97-1.64)    | 1.12 (0.86-1.46)    | 1.21 (0.92-1.60)    | 0.98 (0.70-1.36)    | 1.38 (0.89-2.14)    |                             | 1.31 (0.92-1.87)           | 0.91 (0.61-1.35)    |               | 1.02 (0.71-1.48)    |
| 130-139                                                                          | 132    | 57482                                | 1.39 (1.07-1.80)    | 1.18 (0.91-1.54)    | 1.21 (0.91-1.61)    | 1.08 (0.78-1.50)    | 1.35 (0.85-2.14)    |                             | 1.29 (0.89-1.88)           | 1.00 (0.68-1.46)    |               | 1.17 (0.79-1.72)    |
| 140-159                                                                          | 205    | 68235                                | 1.57 (1.22-2.01)    | 1.31 (1.02-1.69)    | 1.36 (1.04-1.78)    | 1.16 (0.85-1.59)    | 1.59 (1.03-2.47)    | 0.572                       | 1.41 (0.98-2.03)           | 1.09 (0.76-1.57)    | 0.438         | 1.31 (0.89-1.93)    |
| 160-179                                                                          | 82     | 22656                                | 1.81 (1.33-2.45)    | 1.52 (1.12-2.08)    | 1.62 (1.16-2.25)    | 1.42 (0.98-2.07)    | 1.63 (0.93-2.85)    |                             | 2.07 (1.31-3.27)           | 1.13 (0.74-1.73)    |               | 1.00 (0.51-1.95)    |
| >= 180                                                                           | 34     | 6358                                 | 2.56 (1.71-3.83)    | 2.09 (1.39-3.14)    | 2.28 (1.48-3.52)    | 2.12 (1.32-3.41)    | 1.72 (0.74-3.98)    |                             | 2.88 (1.53-5.41)           | 1.50 (0.87-2.57)    |               | 0.82 (0.20-3.42)    |
| p-trend                                                                          |        |                                      | 0.0000003           | 0.0003              | 0.0002              | 0.003               | 0.041               |                             | 0.0007                     | 0.11                |               | 0.336               |
| <b>Diastolic Blood Pressure (mmHg) ESH classification</b>                        |        |                                      |                     |                     |                     |                     |                     |                             |                            |                     |               |                     |
| < 80                                                                             | 219    | 132590                               | 1 (referent)        |                             | 1 (referent)               | 1 (referent)        |               | 1 (referent)        |
| 80-84                                                                            | 144    | 64872                                | 1.17 (0.94-1.44)    | 1.09 (0.88-1.35)    | 1.15 (0.92-1.44)    | 1.07 (0.83-1.39)    | 1.12 (0.77-1.63)    |                             | 0.91 (0.67-1.25)           | 1.26 (0.94-1.71)    |               | 0.86 (0.61-1.23)    |
| 85-89                                                                            | 99     | 41500                                | 1.13 (0.89-1.44)    | 1.02 (0.80-1.30)    | 1.08 (0.84-1.40)    | 1.03 (0.77-1.37)    | 0.97 (0.61-1.54)    |                             | 1.03 (0.72-1.47)           | 1.01 (0.73-1.42)    |               | 0.83 (0.55-1.26)    |
| 90-99                                                                            | 164    | 51196                                | 1.50 (1.22-1.84)    | 1.30 (1.05-1.60)    | 1.40 (1.12-1.76)    | 1.22 (0.95-1.58)    | 1.50 (1.02-2.20)    | 0.073                       | 1.12 (0.80-1.57)           | 1.41 (1.05-1.87)    | 0.708         | 1.08 (0.75-1.55)    |
| 100-109                                                                          | 48     | 13896                                | 1.58 (1.15-2.16)    | 1.28 (0.92-1.77)    | 1.41 (1.00-1.98)    | 1.23 (0.84-1.79)    | 1.48 (0.78-2.83)    |                             | 1.79 (1.11-2.88)           | 1.06 (0.68-1.64)    |               | 0.81 (0.41-1.58)    |
| >= 110                                                                           | 9      | 3264                                 | 1.28 (0.65-2.49)    | 1.01 (0.52-1.99)    | 0.95 (0.44-2.03)    | 0.82 (0.36-1.88)    | 1.91 (0.59-6.11)    |                             | 0.87 (0.21-3.53)           | 1.08 (0.50-2.34)    |               | 0.70 (0.17-2.87)    |
| p-trend                                                                          |        |                                      | 0.0001              | 0.038               | 0.01                | 0.214               | 0.04                |                             | 0.111                      | 0.238               |               | 0.802               |
| <b>Systolic Blood Pressure (mmHg) ASH classification</b>                         |        |                                      |                     |                     |                     |                     |                     |                             |                            |                     |               |                     |
| < 120                                                                            | 105    | 86141                                | 1 (referent)        |                             | 1 (referent)               | 1 (referent)        |               | 1 (referent)        |
| 120-139                                                                          | 257    | 123928                               | 1.32 (1.05-1.67)    | 1.15 (0.91-1.46)    | 1.21 (0.95-1.56)    | 1.03 (0.77-1.38)    | 1.36 (0.92-2.02)    |                             | 1.30 (0.95-1.79)           | 0.96 (0.68-1.36)    |               | 1.09 (0.78-1.50)    |
| 140-159                                                                          | 205    | 68235                                | 1.56 (1.22-2.00)    | 1.31 (1.01-1.69)    | 1.36 (1.03-1.78)    | 1.15 (0.84-1.58)    | 1.59 (1.03-2.47)    | 0.46                        | 1.41 (0.98-2.03)           | 1.09 (0.76-1.56)    | 0.316         | 1.30 (0.88-1.92)    |
| >= 160                                                                           | 116    | 29014                                | 1.97 (1.49-2.61)    | 1.64 (1.23-2.20)    | 1.76 (1.30-2.40)    | 1.57 (1.11-2.23)    | 1.65 (0.98-2.79)    |                             | 2.25 (1.48-3.42)           | 1.21 (0.81-1.80)    |               | 0.96 (0.51-1.80)    |
| p-trend                                                                          |        |                                      | 0.0000009           | 0.0004              | 0.0003              | 0.006               | 0.036               |                             | 0.0005                     | 0.163               |               | 0.447               |
| <b>Diastolic Blood Pressure (mmHg) ASH classification</b>                        |        |                                      |                     |                     |                     |                     |                     |                             |                            |                     |               |                     |
| < 80                                                                             | 219    | 132590                               | 1 (referent)        |                             | 1 (referent)               | 1 (referent)        |               | 1 (referent)        |
| 80-89                                                                            | 243    | 106372                               | 1.15 (0.96-1.39)    | 1.06 (0.88-1.28)    | 1.12 (0.92-1.37)    | 1.05 (0.84-1.32)    | 1.06 (0.76-1.48)    |                             | 0.96 (0.73-1.25)           | 1.15 (0.88-1.51)    |               | 0.85 (0.63-1.16)    |
| 90-99                                                                            | 164    | 51196                                | 1.50 (1.22-1.84)    | 1.30 (1.05-1.60)    | 1.41 (1.12-1.76)    | 1.22 (0.95-1.58)    | 1.50 (1.02-2.21)    | 0.066                       | 1.12 (0.80-1.57)           | 1.41 (1.05-1.87)    | 0.799         | 1.08 (0.75-1.55)    |
| >= 100                                                                           | 57     | 17160                                | 1.52 (1.13-2.04)    | 1.23 (0.91-1.66)    | 1.32 (0.96-1.82)    | 1.15 (0.81-1.64)    | 1.56 (0.87-2.80)    |                             | 1.64 (1.04-2.58)           | 1.06 (0.71-1.59)    |               | 0.79 (0.42-1.47)    |
| p-trend                                                                          |        |                                      | 0.00005             | 0.024               | 0.005               | 0.164               | 0.029               |                             | 0.104                      | 0.157               |               | 0.779               |
| <b>Mean BP (mmHg) (1/3SBP+2/3DBP) Cohort-specific quartiles</b>                  |        |                                      |                     |                     |                     |                     |                     |                             |                            |                     |               |                     |
| 50.0-88.3                                                                        | 101    | 76991                                | 1 (referent)        |                             | 1 (referent)               | 1 (referent)        |               | 1 (referent)        |
| 88.5-96.6                                                                        | 148    | 77727                                | 1.19 (0.92-1.54)    | 1.08 (0.84-1.40)    | 1.12 (0.86-1.48)    | 1.08 (0.78-1.50)    | 1.06 (0.70-1.62)    |                             | 1.32 (0.94-1.85)           | 0.81 (0.54-1.20)    |               | 0.83 (0.58-1.19)    |
| 96.8-105.5                                                                       | 164    | 76327                                | 1.16 (0.90-1.50)    | 1.01 (0.78-1.31)    | 1.03 (0.78-1.35)    | 1.01 (0.73-1.39)    | 0.98 (0.63-1.52)    | 0.248                       | 1.06 (0.73-1.52)           | 0.86 (0.59-1.24)    | 0.982         | 0.74 (0.50-1.09)    |
| 105.6-216.6                                                                      | 270    | 76273                                | 1.70 (1.33-2.16)    | 1.40 (1.09-1.80)    | 1.51 (1.16-1.97)    | 1.33 (0.97-1.82)    | 1.55 (1.03-2.36)    |                             | 1.60 (1.12-2.26)           | 1.11 (0.78-1.59)    |               | 1.05 (0.71-1.55)    |
| p-trend                                                                          |        |                                      | 0.000006            | 0.005               | 0.001               | 0.048               | 0.041               |                             | 0.034                      | 0.108               |               | 0.904               |
| <b>Hypertension (SBP &gt;= 140 mmHg, or DBP &gt;= 90 mmHg, or self-reported)</b> |        |                                      |                     |                     |                     |                     |                     |                             |                            |                     |               |                     |
| Normotensive                                                                     | 301    | 174179                               | 1 (referent)        |                             | 1 (referent)               | 1 (referent)        |               | 1 (referent)        |
| Hypertensive                                                                     | 382    | 133139                               | 1.27 (1.09-1.49)    | 1.21 (1.03-1.42)    | 1.22 (1.03-1.45)    | 1.23 (1.01-1.49)    | 1.17 (0.87-1.56)    | 0.77                        | 1.16 (0.91-1.47)           | 1.22 (0.98-1.51)    | 0.533         | 1.08 (0.82-1.42)    |



| Mouth and oropharynx                                                 |        | Excluding first 2 years of follow-up |                     |                     | Men                 | Women               | Sex                 | BMI <= 25 mg/m <sup>2</sup> | BMI > 25 mg/m <sup>2</sup> | BMI                 | Age <= 53 yrs |                     |
|----------------------------------------------------------------------|--------|--------------------------------------|---------------------|---------------------|---------------------|---------------------|---------------------|-----------------------------|----------------------------|---------------------|---------------|---------------------|
| Cases                                                                | Cohort | HR (crude)                           | HR (adjusted)       | HR (adjusted)       | HR (adjusted)       | HR (adjusted)       | p-interaction       | HR (adjusted)               | HR (adjusted)              | p-interaction       | HR (adjusted) |                     |
| Cases                                                                |        | 332                                  | 332                 | 301                 | 195                 | 137                 |                     | 149                         | 183                        |                     | 128           |                     |
| Cohort size                                                          |        | 307318                               | 307318              | 301857              | 112591              | 194727              |                     | 146326                      | 160992                     |                     | 153303        |                     |
| Mean Systolic Blood Pressure continuous (per 10mmHg increase)        | 332    | 307318                               | 1.095 (1.036-1.157) | 1.070 (1.009-1.134) | 1.082 (1.019-1.150) | 1.036 (0.957-1.123) | 1.107 (1.015-1.207) | 0.06                        | 1.146 (1.054-1.247)        | 1.008 (0.931-1.091) | 0.166         | 0.913 (0.813-1.024) |
| Mean Diastolic Blood Pressure continuous (per 10mmHg increase)       | 332    | 307318                               | 1.186 (1.076-1.308) | 1.131 (1.019-1.255) | 1.156 (1.037-1.288) | 1.053 (0.917-1.211) | 1.246 (1.069-1.452) | 0.017                       | 1.109 (0.945-1.302)        | 1.145 (1.000-1.310) | 0.552         | 0.907 (0.756-1.089) |
| Mean Blood Pressure (1/3SBP+2/3DBP) continuous (per 10mmHg increase) | 332    | 307318                               | 1.164 (1.071-1.265) | 1.119 (1.023-1.223) | 1.141 (1.040-1.252) | 1.054 (0.935-1.189) | 1.205 (1.056-1.376) | 0.022                       | 1.171 (1.025-1.337)        | 1.077 (0.956-1.212) | 0.707         | 0.892 (0.757-1.051) |
| Systolic Blood Pressure (mmHg) ESH classification                    |        |                                      |                     |                     |                     |                     |                     |                             |                            |                     |               |                     |
| < 120                                                                | 54     | 86141                                | 1 (referent)        |                             | 1 (referent)               | 1 (referent)        |               | 1 (referent)        |
| 120-129                                                              | 64     | 66446                                | 1.24 (0.86-1.79)    | 1.15 (0.80-1.66)    | 1.23 (0.83-1.81)    | 0.87 (0.54-1.41)    | 1.49 (0.84-2.64)    |                             | 1.48 (0.90-2.46)           | 0.80 (0.47-1.36)    |               | 0.94 (0.58-1.53)    |
| 130-139                                                              | 66     | 57482                                | 1.33 (0.92-1.92)    | 1.19 (0.82-1.73)    | 1.18 (0.79-1.76)    | 0.93 (0.58-1.50)    | 1.49 (0.82-2.71)    |                             | 1.73 (1.02-2.91)           | 0.75 (0.44-1.27)    |               | 0.81 (0.47-1.39)    |
| 140-159                                                              | 92     | 68235                                | 1.35 (0.95-1.92)    | 1.18 (0.82-1.70)    | 1.26 (0.86-1.84)    | 0.78 (0.48-1.25)    | 1.92 (1.09-3.36)    | 0.016                       | 1.43 (0.83-2.46)           | 0.84 (0.51-1.36)    | 0.157         | 0.88 (0.52-1.50)    |
| 160-179                                                              | 39     | 22656                                | 1.67 (1.08-2.58)    | 1.44 (0.92-2.25)    | 1.61 (1.01-2.56)    | 0.97 (0.54-1.75)    | 2.25 (1.15-4.43)    |                             | 2.45 (1.26-4.77)           | 0.87 (0.48-1.56)    |               | 0.47 (0.16-1.38)    |
| >= 180                                                               | 17     | 6358                                 | 2.52 (1.43-4.43)    | 2.09 (1.17-3.73)    | 2.18 (1.18-4.03)    | 1.83 (0.90-3.70)    | 2.12 (0.77-5.85)    |                             | 4.70 (2.04-10.85)          | 1.01 (0.46-2.23)    |               | 0.51 (0.07-3.82)    |
| p-trend                                                              |        |                                      | 0.003               | 0.04                | 0.023               | 0.669               | 0.011               |                             | 0.003                      | 0.984               |               | 0.229               |
| Diastolic Blood Pressure (mmHg) ESH classification                   |        |                                      |                     |                     |                     |                     |                     |                             |                            |                     |               |                     |
| < 80                                                                 | 108    | 132590                               | 1 (referent)        |                             | 1 (referent)               | 1 (referent)        |               | 1 (referent)        |
| 80-84                                                                | 70     | 64872                                | 1.16 (0.85-1.57)    | 1.10 (0.81-1.49)    | 1.14 (0.83-1.58)    | 0.95 (0.63-1.42)    | 1.28 (0.80-2.05)    |                             | 1.00 (0.65-1.56)           | 1.19 (0.77-1.85)    |               | 0.78 (0.49-1.26)    |
| 85-89                                                                | 48     | 41500                                | 1.12 (0.80-1.58)    | 1.04 (0.73-1.48)    | 1.08 (0.75-1.56)    | 0.93 (0.60-1.45)    | 1.15 (0.65-2.03)    |                             | 1.24 (0.76-2.01)           | 0.92 (0.56-1.51)    |               | 0.49 (0.25-0.95)    |
| 90-99                                                                | 78     | 51196                                | 1.47 (1.09-1.98)    | 1.30 (0.96-1.78)    | 1.40 (1.01-1.94)    | 1.04 (0.69-1.55)    | 1.76 (1.10-2.84)    | 0.004                       | 0.98 (0.58-1.64)           | 1.51 (1.00-2.27)    | 0.576         | 0.90 (0.55-1.48)    |
| 100-109                                                              | 23     | 13896                                | 1.55 (0.98-2.44)    | 1.29 (0.81-2.05)    | 1.37 (0.84-2.24)    | 0.93 (0.50-1.73)    | 2.18 (1.08-4.42)    |                             | 1.91 (0.96-3.79)           | 1.06 (0.56-1.99)    |               | 0.36 (0.11-1.18)    |
| >= 110                                                               | 5      | 3264                                 | 1.49 (0.60-3.65)    | 1.21 (0.49-3.00)    | 1.42 (0.57-3.53)    | 0.91 (0.28-2.93)    | 2.14 (0.51-8.93)    |                             | no cases                   | 1.64 (0.64-4.18)    |               | 1.08 (0.26-4.52)    |
| p-trend                                                              |        |                                      | 0.007               | 0.11                | 0.046               | 0.973               | 0.007               |                             | 0.42                       | 0.157               |               | 0.168               |
| Systolic Blood Pressure (mmHg) ASH classification                    |        |                                      |                     |                     |                     |                     |                     |                             |                            |                     |               |                     |
| < 120                                                                | 54     | 86141                                | 1 (referent)        |                             | 1 (referent)               | 1 (referent)        |               | 1 (referent)        |
| 120-139                                                              | 130    | 123928                               | 1.28 (0.93-1.77)    | 1.17 (0.84-1.62)    | 1.21 (0.85-1.71)    | 0.90 (0.59-1.37)    | 1.49 (0.89-2.50)    |                             | 1.59 (1.01-2.49)           | 0.77 (0.48-1.23)    |               | 0.89 (0.57-1.37)    |
| 140-159                                                              | 92     | 68235                                | 1.35 (0.95-1.92)    | 1.18 (0.82-1.69)    | 1.25 (0.86-1.84)    | 0.77 (0.48-1.24)    | 1.92 (1.09-3.35)    | 0.009                       | 1.42 (0.82-2.43)           | 0.84 (0.51-1.36)    | 0.187         | 0.89 (0.52-1.51)    |
| >= 160                                                               | 56     | 29014                                | 1.85 (1.25-2.76)    | 1.58 (1.05-2.39)    | 1.74 (1.13-2.68)    | 1.16 (0.68-1.98)    | 2.22 (1.17-4.23)    |                             | 2.90 (1.59-5.27)           | 0.90 (0.52-1.57)    |               | 0.49 (0.18-1.28)    |
| p-trend                                                              |        |                                      | 0.004               | 0.049               | 0.019               | 0.836               | 0.008               |                             | 0.004                      | 0.974               |               | 0.248               |
| Diastolic Blood Pressure (mmHg) ASH classification                   |        |                                      |                     |                     |                     |                     |                     |                             |                            |                     |               |                     |
| < 80                                                                 | 108    | 132590                               | 1 (referent)        |                             | 1 (referent)               | 1 (referent)        |               | 1 (referent)        |
| 80-89                                                                | 118    | 106372                               | 1.14 (0.88-1.49)    | 1.07 (0.82-1.41)    | 1.12 (0.84-1.48)    | 0.94 (0.66-1.34)    | 1.23 (0.81-1.87)    |                             | 1.09 (0.75-1.59)           | 1.07 (0.72-1.59)    |               | 0.67 (0.44-1.02)    |
| 90-99                                                                | 78     | 51196                                | 1.47 (1.09-1.98)    | 1.30 (0.96-1.78)    | 1.40 (1.01-1.94)    | 1.04 (0.69-1.55)    | 1.77 (1.10-2.84)    | 0.003                       | 0.98 (0.58-1.64)           | 1.51 (1.00-2.27)    | 0.527         | 0.91 (0.55-1.49)    |
| >= 100                                                               | 28     | 17160                                | 1.54 (1.01-2.34)    | 1.27 (0.82-1.97)    | 1.38 (0.88-2.18)    | 0.93 (0.52-1.64)    | 2.18 (1.13-4.21)    |                             | 1.61 (0.81-3.19)           | 1.17 (0.67-2.07)    |               | 0.50 (0.19-1.27)    |
| p-trend                                                              |        |                                      | 0.005               | 0.091               | 0.037               | 0.972               | 0.004               |                             | 0.414                      | 0.125               |               | 0.192               |
| Mean BP (mmHg) (1/3SBP+2/3DBP) Cohort-specific quartiles             |        |                                      |                     |                     |                     |                     |                     |                             |                            |                     |               |                     |
| 50.0-88.3                                                            | 49     | 76991                                | 1 (referent)        |                             | 1 (referent)               | 1 (referent)        |               | 1 (referent)        |
| 88.5-96.6                                                            | 77     | 77727                                | 1.29 (0.90-1.86)    | 1.21 (0.84-1.75)    | 1.27 (0.87-1.87)    | 1.01 (0.62-1.65)    | 1.38 (0.80-2.39)    |                             | 1.93 (1.18-3.13)           | 0.62 (0.36-1.08)    |               | 0.87 (0.55-1.38)    |
| 96.8-105.5                                                           | 71     | 76327                                | 1.06 (0.73-1.53)    | 0.96 (0.66-1.41)    | 0.92 (0.61-1.39)    | 0.80 (0.49-1.32)    | 1.07 (0.59-1.93)    | 0.013                       | 1.20 (0.69-2.08)           | 0.64 (0.38-1.07)    | 0.749         | 0.38 (0.21-0.69)    |
| 105.6-216.6                                                          | 135    | 76273                                | 1.80 (1.28-2.54)    | 1.55 (1.08-2.23)    | 1.71 (1.17-2.49)    | 1.14 (0.71-1.84)    | 2.17 (1.27-3.73)    |                             | 2.22 (1.32-3.73)           | 0.97 (0.60-1.56)    |               | 0.82 (0.48-1.38)    |
| p-trend                                                              |        |                                      | 0.001               | 0.022               | 0.008               | 0.57                | 0.007               |                             | 0.026                      | 0.314               |               | 0.151               |
| Hypertension (SBP >= 140 mmHg, or DBP >= 90 mmHg, or self-reported)  |        |                                      |                     |                     |                     |                     |                     |                             |                            |                     |               |                     |
| Normotensive                                                         | 152    | 174179                               | 1 (referent)        |                             | 1 (referent)               | 1 (referent)        |               | 1 (referent)        |
| Hypertensive                                                         | 180    | 133139                               | 1.23 (0.98-1.54)    | 1.15 (0.91-1.45)    | 1.20 (0.94-1.53)    | 1.04 (0.77-1.41)    | 1.31 (0.91-1.89)    | 0.076                       | 1.07 (0.76-1.51)           | 1.21 (0.89-1.66)    | 0.319         | 0.97 (0.66-1.41)    |

| Age > 53 yrs                                                                                                               | Age           | Never smokers                                                                                                             | Ever smokers                                                                                                              | Smoking       | Alcohol <= 12g                                                                                                            | Alcohol > 12g                                                                                                             | Alcohol       | No antihypertensive treatment                                                                                             | Antihypertensive treatment                          | Treatment     |                                                                                                                            |
|----------------------------------------------------------------------------------------------------------------------------|---------------|---------------------------------------------------------------------------------------------------------------------------|---------------------------------------------------------------------------------------------------------------------------|---------------|---------------------------------------------------------------------------------------------------------------------------|---------------------------------------------------------------------------------------------------------------------------|---------------|---------------------------------------------------------------------------------------------------------------------------|-----------------------------------------------------|---------------|----------------------------------------------------------------------------------------------------------------------------|
| HR (adjusted)                                                                                                              | p-interaction | HR (adjusted)                                                                                                             | HR (adjusted)                                                                                                             | p-interaction | HR (adjusted)                                                                                                             | HR (adjusted)                                                                                                             | p-interaction | HR (adjusted)                                                                                                             | HR (adjusted)                                       | p-interaction |                                                                                                                            |
| 204<br>154015                                                                                                              |               | 88<br>141931                                                                                                              | 241<br>160623                                                                                                             |               | 154<br>205214                                                                                                             | 178<br>102104                                                                                                             |               | 247<br>227336                                                                                                             | 42<br>37017                                         |               | Cases<br>Cohort size                                                                                                       |
| 1.138 (1.064-1.217)                                                                                                        | 0.002         | 1.045 (0.930-1.175)                                                                                                       | 1.075 (1.004-1.151)                                                                                                       | 0.647         | 1.033 (0.945-1.129)                                                                                                       | 1.103 (1.020-1.193)                                                                                                       | 0.305         | 1.062 (0.987-1.142)                                                                                                       | 1.138 (0.975-1.328)                                 | 0.218         | Mean Systolic Blood Pressure continuous (per 10mmHg increase)                                                              |
| 1.252 (1.110-1.413)                                                                                                        | 0.006         | 1.073 (0.872-1.321)                                                                                                       | 1.145 (1.013-1.293)                                                                                                       | 0.9           | 1.025 (0.875-1.201)                                                                                                       | 1.224 (1.064-1.408)                                                                                                       | 0.181         | 1.154 (1.016-1.310)                                                                                                       | 1.141 (0.837-1.555)                                 | 0.924         | Mean Diastolic Blood Pressure continuous (per 10mmHg increase)                                                             |
| 1.236 (1.114-1.371)                                                                                                        | 0.002         | 1.072 (0.897-1.282)                                                                                                       | 1.129 (1.018-1.252)                                                                                                       | 0.864         | 1.038 (0.906-1.189)                                                                                                       | 1.190 (1.056-1.341)                                                                                                       | 0.201         | 1.125 (1.007-1.256)                                                                                                       | 1.197 (0.925-1.548)                                 | 0.448         | Mean Blood Pressure (1/3SBP+2/3DBP) continuous (per 10mmHg increase)                                                       |
| 1 (referent)<br>1.58 (0.86-2.89)<br>1.85 (1.03-3.32)<br>1.73 (0.98-3.04)<br>2.48 (1.34-4.58)<br>3.58 (1.74-7.35)<br>0.0007 | 0.004         | 1 (referent)<br>1.02 (0.50-2.10)<br>0.75 (0.34-1.67)<br>1.31 (0.66-2.61)<br>1.35 (0.58-3.14)<br>1.17 (0.32-4.34)<br>0.358 | 1 (referent)<br>1.21 (0.79-1.87)<br>1.39 (0.90-2.14)<br>1.12 (0.72-1.73)<br>1.43 (0.84-2.44)<br>2.56 (1.34-4.91)<br>0.078 | 0.441         | 1 (referent)<br>1.03 (0.61-1.71)<br>1.28 (0.77-2.13)<br>1.06 (0.63-1.78)<br>1.43 (0.75-2.72)<br>1.21 (0.41-3.55)<br>0.398 | 1 (referent)<br>1.29 (0.75-2.21)<br>1.11 (0.63-1.93)<br>1.31 (0.78-2.21)<br>1.48 (0.79-2.78)<br>2.88 (1.39-5.97)<br>0.039 | 0.45          | 1 (referent)<br>1.36 (0.91-2.04)<br>1.45 (0.96-2.20)<br>1.43 (0.94-2.16)<br>1.92 (1.13-3.28)<br>0.93 (0.28-3.05)<br>0.072 | two cases in referent<br>-<br>-<br>-<br>-<br>-<br>- | -             | ESH classification<br>< 120<br>120-129<br>130-139<br>140-159<br>160-179<br>>= 180<br>p-trend                               |
| 1 (referent)<br>1.46 (0.97-2.22)<br>1.63 (1.05-2.52)<br>1.74 (1.16-2.62)<br>2.19 (1.27-3.77)<br>1.37 (0.42-4.45)<br>0.003  | 0.007         | 1 (referent)<br>1.04 (0.58-1.87)<br>0.89 (0.44-1.77)<br>0.98 (0.52-1.83)<br>0.76 (0.26-2.24)<br>3.10 (1.05-9.18)<br>0.717 | 1 (referent)<br>1.09 (0.76-1.57)<br>1.10 (0.73-1.65)<br>1.42 (1.00-2.03)<br>1.42 (0.83-2.42)<br>0.34 (0.05-2.47)<br>0.132 | 0.954         | 1 (referent)<br>0.86 (0.56-1.34)<br>0.73 (0.43-1.25)<br>0.99 (0.62-1.56)<br>0.97 (0.45-2.06)<br>1.02 (0.25-4.24)<br>0.841 | 1 (referent)<br>1.45 (0.93-2.25)<br>1.41 (0.87-2.28)<br>1.73 (1.12-2.66)<br>1.70 (0.92-3.13)<br>1.48 (0.45-4.85)<br>0.022 | 0.147         | 1 (referent)<br>1.00 (0.71-1.42)<br>1.24 (0.85-1.82)<br>1.37 (0.96-1.97)<br>1.13 (0.58-2.21)<br>0.53 (0.07-3.83)<br>0.159 | two cases in referent<br>-<br>-<br>-<br>-<br>-<br>- | -             | Diastolic Blood Pressure (mmHg) ESH classification<br>< 80<br>80-84<br>85-89<br>90-99<br>100-109<br>>= 110<br>p-trend      |
| 1 (referent)<br>1.72 (0.99-2.97)<br>1.72 (0.97-3.02)<br>2.72 (1.51-4.89)<br>0.001                                          | 0.007         | 1 (referent)<br>0.90 (0.47-1.72)<br>1.33 (0.67-2.65)<br>1.33 (0.59-2.99)<br>0.241                                         | 1 (referent)<br>1.30 (0.88-1.91)<br>1.11 (0.72-1.71)<br>1.67 (1.03-2.72)<br>0.141                                         | 0.278         | 1 (referent)<br>1.14 (0.73-1.78)<br>1.05 (0.63-1.76)<br>1.37 (0.74-2.51)<br>0.473                                         | 1 (referent)<br>1.20 (0.73-1.95)<br>1.31 (0.78-2.21)<br>1.81 (1.02-3.21)<br>0.04                                          | 0.411         | 1 (referent)<br>1.40 (0.98-2.02)<br>1.42 (0.94-2.16)<br>1.72 (1.02-2.88)<br>0.053                                         | two cases in referent<br>-<br>-<br>-<br>-           | -             | Systolic Blood Pressure (mmHg) ASH classification<br>< 120<br>120-139<br>140-159<br>>= 160<br>p-trend                      |
| 1 (referent)<br>1.53 (1.06-2.21)<br>1.74 (1.16-2.62)<br>2.03 (1.21-3.41)<br>0.003                                          | 0.007         | 1 (referent)<br>0.98 (0.58-1.64)<br>0.98 (0.52-1.83)<br>1.23 (0.54-2.80)<br>0.77                                          | 1 (referent)<br>1.09 (0.80-1.50)<br>1.42 (1.00-2.03)<br>1.22 (0.72-2.05)<br>0.106                                         | 0.969         | 1 (referent)<br>0.81 (0.55-1.19)<br>0.99 (0.62-1.57)<br>0.98 (0.49-1.96)<br>0.906                                         | 1 (referent)<br>1.43 (0.97-2.12)<br>1.73 (1.12-2.66)<br>1.66 (0.94-2.95)<br>0.018                                         | 0.161         | 1 (referent)<br>1.10 (0.81-1.48)<br>1.37 (0.95-1.97)<br>1.02 (0.54-1.94)<br>0.237                                         | two cases in referent<br>-<br>-<br>-<br>-           | -             | Diastolic Blood Pressure (mmHg) ASH classification<br>< 80<br>80-89<br>90-99<br>>= 100<br>p-trend                          |
| 1 (referent)<br>2.32 (1.18-4.54)<br>2.43 (1.26-4.69)<br>3.44 (1.81-6.53)<br>0.00008                                        | 0.0005        | 1 (referent)<br>1.42 (0.71-2.84)<br>0.79 (0.36-1.72)<br>1.39 (0.68-2.85)<br>0.635                                         | 1 (referent)<br>1.15 (0.75-1.78)<br>1.01 (0.65-1.57)<br>1.61 (1.06-2.45)<br>0.021                                         | 0.911         | 1 (referent)<br>1.47 (0.90-2.39)<br>0.93 (0.55-1.59)<br>1.33 (0.79-2.24)<br>0.69                                          | 1 (referent)<br>0.93 (0.53-1.63)<br>0.96 (0.56-1.65)<br>1.69 (1.01-2.81)<br>0.006                                         | 0.132         | 1 (referent)<br>1.36 (0.91-2.02)<br>1.16 (0.76-1.76)<br>1.78 (1.18-2.70)<br>0.015                                         | single case in referent<br>-<br>-<br>-<br>-         | -             | Mean BP (mmHg) (1/3SBP+2/3DBP) Cohort-specific quartiles<br>50.0-88.3<br>88.5-96.6<br>96.8-105.5<br>105.6-216.6<br>p-trend |
| 1 (referent)<br>1.28 (0.95-1.72)                                                                                           | 0.242         | 1 (referent)<br>1.14 (0.71-1.81)                                                                                          | 1 (referent)<br>1.13 (0.86-1.48)                                                                                          | 0.433         | 1 (referent)<br>1.05 (0.75-1.48)                                                                                          | 1 (referent)<br>1.26 (0.92-1.74)                                                                                          | 0.528         | -<br>1 (referent)                                                                                                         | -<br>0.96 (0.66-1.39)                               | -             | Hypertension (SBP >= 140 mmHg, or DBP >= 90 mmHg, or self-reported)<br>Normotensive<br>Hypertensive                        |

| Larynx                                                               |  | Cases | Cohort | HR (crude)          | HR (adjusted)       | Excluding first 2 years of follow-up HR (adjusted) | Men HR (adjusted)   | Women HR (adjusted) | Sex p-interaction | BMI <= 25 mg/m <sup>2</sup> HR (adjusted) | BMI > 25 mg/m <sup>2</sup> HR (adjusted) | BMI p-interaction | Age <= 53 yrs HR (adjusted) |
|----------------------------------------------------------------------|--|-------|--------|---------------------|---------------------|----------------------------------------------------|---------------------|---------------------|-------------------|-------------------------------------------|------------------------------------------|-------------------|-----------------------------|
| Cases                                                                |  |       |        | 239                 | 239                 | 207                                                | 201                 | 38                  |                   | 101                                       | 138                                      |                   | 67                          |
| Cohort size                                                          |  |       |        | 307318              | 307318              | 301857                                             | 112591              | 194727              |                   | 146326                                    | 160992                                   |                   | 153303                      |
| Mean Systolic Blood Pressure continuous (per 10mmHg increase)        |  | 239   | 307318 | 1.143 (1.073-1.217) | 1.115 (1.043-1.192) | 1.127 (1.049-1.211)                                | 1.129 (1.049-1.215) | 1.042 (0.882-1.232) | 0.305             | 1.153 (1.043-1.275)                       | 1.078 (0.986-1.179)                      | 0.532             | 1.170 (1.014-1.351)         |
| Mean Diastolic Blood Pressure continuous (per 10mmHg increase)       |  | 239   | 307318 | 1.201 (1.070-1.349) | 1.106 (0.978-1.251) | 1.145 (1.005-1.306)                                | 1.099 (0.961-1.256) | 1.151 (0.842-1.573) | 0.77              | 1.214 (1.006-1.464)                       | 1.018 (0.866-1.196)                      | 0.131             | 1.109 (0.868-1.417)         |
| Mean Blood Pressure (1/3SBP+2/3DBP) continuous (per 10mmHg increase) |  | 239   | 307318 | 1.211 (1.099-1.335) | 1.144 (1.031-1.269) | 1.173 (1.050-1.311)                                | 1.150 (1.027-1.288) | 1.103 (0.851-1.429) | 0.715             | 1.226 (1.049-1.433)                       | 1.069 (0.932-1.226)                      | 0.243             | 1.179 (0.953-1.460)         |
| Systolic Blood Pressure (mmHg) ESH classification                    |  |       |        |                     |                     |                                                    |                     |                     |                   |                                           |                                          |                   |                             |
| < 120                                                                |  | 34    | 86141  | 1 (referent)        | 1 (referent)        | 1 (referent)                                       | 1 (referent)        | 1 (referent)        |                   | 1 (referent)                              | 1 (referent)                             |                   | 1 (referent)                |
| 120-129                                                              |  | 41    | 66446  | 1.30 (0.82-2.05)    | 1.07 (0.67-1.70)    | 1.19 (0.72-1.95)                                   | 1.05 (0.62-1.77)    | 1.08 (0.39-2.94)    |                   | 1.18 (0.63-2.21)                          | 1.00 (0.50-2.00)                         |                   | 1.22 (0.59-2.53)            |
| 130-139                                                              |  | 44    | 57482  | 1.46 (0.92-2.30)    | 1.13 (0.71-1.79)    | 1.24 (0.75-2.04)                                   | 1.07 (0.63-1.81)    | 1.40 (0.52-3.77)    |                   | 0.84 (0.41-1.73)                          | 1.31 (0.69-2.50)                         |                   | 1.36 (0.64-2.91)            |
| 140-159                                                              |  | 73    | 68235  | 1.73 (1.13-2.66)    | 1.36 (0.88-2.11)    | 1.47 (0.91-2.37)                                   | 1.32 (0.81-2.16)    | 1.65 (0.63-4.31)    | 0.323             | 1.58 (0.86-2.91)                          | 1.18 (0.63-2.22)                         | 0.833             | 2.05 (0.97-4.33)            |
| 160-179                                                              |  | 32    | 22656  | 2.20 (1.32-3.65)    | 1.76 (1.04-2.96)    | 1.81 (1.02-3.21)                                   | 1.87 (1.06-3.30)    | 0.81 (0.16-4.02)    |                   | 2.15 (1.00-4.64)                          | 1.49 (0.73-3.07)                         |                   | 2.75 (0.94-8.03)            |
| ≥ 180                                                                |  | 15    | 6358   | 3.47 (1.83-6.55)    | 2.73 (1.43-5.23)    | 3.27 (1.64-6.49)                                   | 2.95 (1.47-5.93)    | 1.17 (0.13-10.55)   |                   | 3.02 (1.08-8.47)                          | 2.43 (1.03-5.73)                         |                   | 2.89 (0.37-22.86)           |
| p-trend                                                              |  |       |        | 0.00004             | 0.002               | 0.002                                              | 0.002               | 0.579               |                   | 0.015                                     | 0.065                                    |                   | 0.021                       |
| Diastolic Blood Pressure (mmHg) ESH classification                   |  |       |        |                     |                     |                                                    |                     |                     |                   |                                           |                                          |                   |                             |
| < 80                                                                 |  | 73    | 132590 | 1 (referent)        | 1 (referent)        | 1 (referent)                                       | 1 (referent)        | 1 (referent)        |                   | 1 (referent)                              | 1 (referent)                             |                   | 1 (referent)                |
| 80-84                                                                |  | 49    | 64872  | 1.18 (0.82-1.71)    | 1.09 (0.75-1.57)    | 1.16 (0.78-1.73)                                   | 1.09 (0.73-1.64)    | 1.13 (0.47-2.71)    |                   | 0.76 (0.42-1.38)                          | 1.37 (0.84-2.23)                         |                   | 0.83 (0.40-1.70)            |
| 85-89                                                                |  | 31    | 41500  | 1.05 (0.69-1.61)    | 0.92 (0.60-1.42)    | 1.02 (0.65-1.62)                                   | 0.97 (0.61-1.54)    | 0.63 (0.18-2.20)    |                   | 0.81 (0.41-1.60)                          | 0.98 (0.56-1.73)                         |                   | 1.27 (0.62-2.62)            |
| 90-99                                                                |  | 65    | 51196  | 1.77 (1.26-2.49)    | 1.48 (1.04-2.10)    | 1.67 (1.14-2.43)                                   | 1.45 (0.98-2.13)    | 1.72 (0.72-4.11)    | 0.781             | 1.66 (0.99-2.76)                          | 1.36 (0.84-2.20)                         | 0.186             | 1.25 (0.61-2.55)            |
| 100-109                                                              |  | 17    | 13896  | 1.70 (0.99-2.89)    | 1.33 (0.77-2.29)    | 1.47 (0.82-2.65)                                   | 1.37 (0.77-2.44)    | 0.80 (0.10-6.23)    |                   | 1.56 (0.65-3.75)                          | 1.23 (0.61-2.47)                         |                   | 2.43 (0.95-6.23)            |
| ≥ 110                                                                |  | 4     | 3264   | 1.67 (0.61-4.58)    | 1.24 (0.45-3.45)    | 0.78 (0.19-3.24)                                   | 1.04 (0.32-3.36)    | 3.62 (0.45-29.04)   |                   | 2.54 (0.60-10.68)                         | 0.79 (0.19-3.33)                         |                   | no cases                    |
| p-trend                                                              |  |       |        | 0.001               | 0.063               | 0.037                                              | 0.102               | 0.379               |                   | 0.039                                     | 0.584                                    |                   | 0.206                       |
| Systolic Blood Pressure (mmHg) ASH classification                    |  |       |        |                     |                     |                                                    |                     |                     |                   |                                           |                                          |                   |                             |
| < 120                                                                |  | 34    | 86141  | 1 (referent)        | 1 (referent)        | 1 (referent)                                       | 1 (referent)        | 1 (referent)        |                   | 1 (referent)                              | 1 (referent)                             |                   | 1 (referent)                |
| 120-139                                                              |  | 85    | 123928 | 1.37 (0.92-2.06)    | 1.10 (0.73-1.65)    | 1.21 (0.77-1.89)                                   | 1.06 (0.66-1.69)    | 1.22 (0.52-2.87)    |                   | 1.03 (0.58-1.82)                          | 1.16 (0.64-2.13)                         |                   | 1.28 (0.67-2.44)            |
| 140-159                                                              |  | 73    | 68235  | 1.72 (1.12-2.65)    | 1.35 (0.88-2.10)    | 1.46 (0.91-2.35)                                   | 1.31 (0.80-2.15)    | 1.64 (0.63-4.26)    | 0.265             | 1.59 (0.87-2.94)                          | 1.17 (0.62-2.20)                         | 0.545             | 2.04 (0.97-4.32)            |
| ≥ 160                                                                |  | 47    | 29014  | 2.47 (1.54-3.95)    | 1.97 (1.21-3.19)    | 2.12 (1.25-3.60)                                   | 2.10 (1.23-3.59)    | 0.89 (0.22-3.59)    |                   | 2.37 (1.17-4.80)                          | 1.69 (0.86-3.33)                         |                   | 2.75 (1.00-7.57)            |
| p-trend                                                              |  |       |        | 0.00008             | 0.002               | 0.003                                              | 0.002               | 0.712               |                   | 0.007                                     | 0.124                                    |                   | 0.019                       |
| Diastolic Blood Pressure (mmHg) ASH classification                   |  |       |        |                     |                     |                                                    |                     |                     |                   |                                           |                                          |                   |                             |
| < 80                                                                 |  | 73    | 132590 | 1 (referent)        | 1 (referent)        | 1 (referent)                                       | 1 (referent)        | 1 (referent)        |                   | 1 (referent)                              | 1 (referent)                             |                   | 1 (referent)                |
| 80-89                                                                |  | 80    | 106372 | 1.13 (0.82-1.56)    | 1.02 (0.74-1.41)    | 1.10 (0.78-1.57)                                   | 1.04 (0.73-1.49)    | 0.93 (0.42-2.05)    |                   | 0.78 (0.48-1.29)                          | 1.19 (0.77-1.86)                         |                   | 1.00 (0.56-1.80)            |
| 90-99                                                                |  | 65    | 51196  | 1.77 (1.26-2.49)    | 1.48 (1.04-2.10)    | 1.67 (1.14-2.43)                                   | 1.45 (0.99-2.13)    | 1.72 (0.72-4.11)    | 0.776             | 1.66 (0.99-2.76)                          | 1.36 (0.84-2.20)                         | 0.289             | 1.25 (0.61-2.54)            |
| ≥ 100                                                                |  | 21    | 17160  | 1.69 (1.03-2.76)    | 1.31 (0.79-2.17)    | 1.34 (0.76-2.34)                                   | 1.31 (0.76-2.24)    | 1.32 (0.29-5.96)    |                   | 1.72 (0.79-3.76)                          | 1.13 (0.59-2.19)                         |                   | 1.96 (0.76-5.01)            |
| p-trend                                                              |  |       |        | 0.0008              | 0.043               | 0.024                                              | 0.075               | 0.332               |                   | 0.048                                     | 0.394                                    |                   | 0.227                       |
| Mean BP (mmHg) (1/3SBP+2/3DBP) Cohort-specific quartiles             |  |       |        |                     |                     |                                                    |                     |                     |                   |                                           |                                          |                   |                             |
| 50.0-88.3                                                            |  | 33    | 76991  | 1 (referent)        | 1 (referent)        | 1 (referent)                                       | 1 (referent)        | 1 (referent)        |                   | 1 (referent)                              | 1 (referent)                             |                   | 1 (referent)                |
| 88.5-96.6                                                            |  | 51    | 77727  | 1.26 (0.81-1.95)    | 1.06 (0.68-1.66)    | 1.13 (0.70-1.84)                                   | 1.16 (0.70-1.94)    | 0.73 (0.27-1.96)    |                   | 0.95 (0.52-1.75)                          | 1.28 (0.65-2.53)                         |                   | 0.95 (0.46-1.95)            |
| 96.8-105.5                                                           |  | 58    | 76327  | 1.23 (0.79-1.90)    | 1.00 (0.64-1.56)    | 1.10 (0.68-1.78)                                   | 1.02 (0.61-1.70)    | 1.07 (0.42-2.69)    | 0.767             | 0.83 (0.44-1.56)                          | 1.16 (0.60-2.24)                         | 0.608             | 1.11 (0.53-2.29)            |
| 105.6-216.6                                                          |  | 97    | 76273  | 1.82 (1.20-2.74)    | 1.39 (0.91-2.14)    | 1.55 (0.97-2.48)                                   | 1.47 (0.90-2.39)    | 1.19 (0.46-3.06)    |                   | 1.58 (0.89-2.82)                          | 1.34 (0.70-2.54)                         |                   | 1.57 (0.74-3.32)            |
| p-trend                                                              |  |       |        | 0.003               | 0.087               | 0.042                                              | 0.102               | 0.569               |                   | 0.118                                     | 0.462                                    |                   | 0.206                       |
| Hypertension (SBP ≥ 140 mmHg, or DBP ≥ 90 mmHg, or self-reported)    |  |       |        |                     |                     |                                                    |                     |                     |                   |                                           |                                          |                   |                             |
| Normotensive                                                         |  | 97    | 174179 | 1 (referent)        | 1 (referent)        | 1 (referent)                                       | 1 (referent)        | 1 (referent)        |                   | 1 (referent)                              | 1 (referent)                             |                   | 1 (referent)                |
| Hypertensive                                                         |  | 142   | 133139 | 1.42 (1.08-1.85)    | 1.37 (1.04-1.80)    | 1.37 (1.02-1.83)                                   | 1.37 (1.01-1.85)    | 1.38 (0.70-2.72)    | 0.873             | 1.61 (1.07-2.43)                          | 1.15 (0.80-1.66)                         | 0.308             | 1.37 (0.82-2.29)            |



| Age > 53 yrs        | Age           | Never smokers           | Ever smokers        | Smoking       | Alcohol <= 12g      | Alcohol > 12g       | Alcohol       | No antihypertensive treatment | Antihypertensive treatment | Treatment     | Larynx                                                               |
|---------------------|---------------|-------------------------|---------------------|---------------|---------------------|---------------------|---------------|-------------------------------|----------------------------|---------------|----------------------------------------------------------------------|
| HR (adjusted)       | p-interaction | HR (adjusted)           | HR (adjusted)       | p-interaction | HR (adjusted)       | HR (adjusted)       | p-interaction | HR (adjusted)                 | HR (adjusted)              | p-interaction |                                                                      |
| 172<br>154015       |               | 16<br>141931            | 218<br>160623       |               | 102<br>205214       | 137<br>102104       |               | 149<br>227336                 | 50<br>37017                |               | Cases<br>Cohort size                                                 |
| 1.099 (1.019-1.186) | 0.76          | 1.045 (0.781-1.398)     | 1.135 (1.059-1.217) | 0.677         | 1.043 (0.935-1.164) | 1.160 (1.065-1.264) | 0.166         | 1.047 (0.953-1.152)           | 1.197 (1.036-1.383)        | 0.088         | Mean Systolic Blood Pressure continuous (per 10mmHg increase)        |
| 1.107 (0.959-1.278) | 0.681         | 1.003 (0.593-1.698)     | 1.127 (0.992-1.280) | 0.903         | 1.076 (0.888-1.303) | 1.133 (0.963-1.334) | 0.774         | 0.980 (0.828-1.161)           | 1.253 (0.939-1.672)        | 0.09          | Mean Diastolic Blood Pressure continuous (per 10mmHg increase)       |
| 1.133 (1.005-1.277) | 0.883         | 1.037 (0.661-1.628)     | 1.170 (1.051-1.303) | 0.775         | 1.070 (0.907-1.263) | 1.196 (1.045-1.369) | 0.371         | 1.026 (0.887-1.188)           | 1.309 (1.030-1.665)        | 0.05          | Mean Blood Pressure (1/3SBP+2/3DBP) continuous (per 10mmHg increase) |
| 1 (referent)        |               | two cases in referent   | 1 (referent)        |               | 1 (referent)        | 1 (referent)        |               | 1 (referent)                  | single case in referent    |               | Systolic Blood Pressure (mmHg) ESH classification                    |
| 0.98 (0.54-1.79)    |               | -                       | 1.09 (0.67-1.78)    |               | 0.82 (0.44-1.54)    | 1.45 (0.72-2.91)    |               | 1.05 (0.63-1.75)              | -                          |               | < 120                                                                |
| 1.01 (0.56-1.81)    |               | -                       | 1.13 (0.69-1.84)    |               | 0.99 (0.53-1.85)    | 1.28 (0.63-2.58)    |               | 0.95 (0.56-1.63)              | -                          |               | 120-129                                                              |
| 1.13 (0.66-1.93)    | 0.712         | -                       | 1.46 (0.92-2.31)    | -             | 0.88 (0.47-1.64)    | 1.95 (1.02-3.73)    | 0.074         | 1.17 (0.70-1.95)              | -                          | -             | 130-139                                                              |
| 1.47 (0.80-2.72)    |               | -                       | 1.97 (1.15-3.38)    |               | 1.22 (0.55-2.69)    | 2.42 (1.16-5.05)    |               | 1.10 (0.52-2.29)              | -                          |               | 140-159                                                              |
| 2.37 (1.15-4.88)    |               | -                       | 2.93 (1.49-5.77)    |               | 1.42 (0.46-4.39)    | 4.39 (1.86-10.38)   |               | 2.29 (0.91-5.78)              | -                          |               | 160-179                                                              |
| 0.024               |               | -                       | 0.0006              |               | 0.606               | 0.0005              |               | 0.303                         | -                          |               | >= 180                                                               |
|                     |               |                         |                     |               |                     |                     |               |                               |                            |               | p-trend                                                              |
| 1 (referent)        |               | 1 (referent)            | 1 (referent)        |               | 1 (referent)        | 1 (referent)        |               | 1 (referent)                  | three cases in referent    |               | Diastolic Blood Pressure (mmHg) ESH classification                   |
| 1.20 (0.78-1.85)    |               | 0.49 (0.09-2.67)        | 1.16 (0.79-1.70)    |               | 1.32 (0.78-2.22)    | 0.94 (0.55-1.58)    |               | 1.19 (0.78-1.81)              | -                          |               | < 80                                                                 |
| 0.81 (0.47-1.37)    |               | 0.38 (0.04-3.53)        | 1.00 (0.64-1.55)    |               | 0.73 (0.36-1.50)    | 1.03 (0.60-1.78)    |               | 0.95 (0.57-1.59)              | -                          |               | 80-84                                                                |
| 1.55 (1.03-2.34)    | 0.944         | 1.74 (0.47-6.46)        | 1.45 (1.00-2.10)    | 0.605         | 1.39 (0.80-2.41)    | 1.51 (0.95-2.40)    | 0.665         | 0.96 (0.58-1.56)              | -                          | -             | 85-89                                                                |
| 1.05 (0.54-2.07)    |               | 0.91 (0.09-8.72)        | 1.39 (0.79-2.46)    |               | 1.34 (0.55-3.29)    | 1.34 (0.67-2.69)    |               | 1.19 (0.53-2.67)              | -                          |               | 90-99                                                                |
| 1.59 (0.56-4.48)    |               | no cases                | 1.35 (0.48-3.75)    |               | 1.60 (0.38-6.79)    | 1.09 (0.26-4.61)    |               | 0.67 (0.09-4.90)              | -                          |               | 100-109                                                              |
| 0.157               |               | 0.544                   | 0.076               |               | 0.369               | 0.093               |               | 0.829                         | -                          |               | >= 110                                                               |
|                     |               |                         |                     |               |                     |                     |               |                               |                            |               | p-trend                                                              |
| 1 (referent)        |               | two cases in referent   | 1 (referent)        |               | 1 (referent)        | 1 (referent)        |               | 1 (referent)                  | single case in referent    |               | Systolic Blood Pressure (mmHg) ASH classification                    |
| 1.00 (0.59-1.69)    |               | -                       | 1.11 (0.72-1.71)    |               | 0.90 (0.52-1.55)    | 1.36 (0.72-2.56)    |               | 1.00 (0.64-1.58)              | -                          |               | < 120                                                                |
| 1.12 (0.65-1.93)    | 0.634         | -                       | 1.45 (0.91-2.30)    | -             | 0.87 (0.47-1.63)    | 1.94 (1.02-3.71)    | 0.069         | 1.17 (0.70-1.95)              | -                          | -             | 120-139                                                              |
| 1.68 (0.95-2.99)    |               | -                       | 2.18 (1.32-3.62)    |               | 1.25 (0.60-2.60)    | 2.84 (1.42-5.68)    |               | 1.34 (0.70-2.58)              | -                          |               | 140-159                                                              |
| 0.031               |               | -                       | 0.0006              |               | 0.69                | 0.0005              |               | 0.306                         | -                          |               | >= 160                                                               |
|                     |               |                         |                     |               |                     |                     |               |                               |                            |               | p-trend                                                              |
| 1 (referent)        |               | 1 (referent)            | 1 (referent)        |               | 1 (referent)        | 1 (referent)        |               | 1 (referent)                  | three cases in referent    |               | Diastolic Blood Pressure (mmHg) ASH classification                   |
| 1.03 (0.70-1.52)    |               | 0.45 (0.10-2.02)        | 1.09 (0.78-1.53)    |               | 1.07 (0.67-1.74)    | 0.98 (0.63-1.53)    |               | 1.10 (0.75-1.59)              | -                          |               | < 80                                                                 |
| 1.55 (1.03-2.34)    | 0.832         | 1.75 (0.47-6.51)        | 1.45 (1.00-2.10)    | 0.622         | 1.40 (0.81-2.42)    | 1.51 (0.95-2.40)    | 0.885         | 0.96 (0.59-1.57)              | -                          | -             | 80-89                                                                |
| 1.16 (0.64-2.12)    |               | 0.73 (0.08-7.05)        | 1.39 (0.82-2.34)    |               | 1.41 (0.63-3.14)    | 1.29 (0.67-2.49)    |               | 1.09 (0.51-2.34)              | -                          |               | 90-99                                                                |
| 0.104               |               | 0.556                   | 0.052               |               | 0.212               | 0.104               |               | 0.951                         | -                          |               | >= 100                                                               |
|                     |               |                         |                     |               |                     |                     |               |                               |                            |               | p-trend                                                              |
| 1 (referent)        |               | three cases in referent | 1 (referent)        |               | 1 (referent)        | 1 (referent)        |               | 1 (referent)                  | single case in referent    |               | Mean BP (mmHg) (1/3SBP+2/3DBP) Cohort-specific quartiles             |
| 1.15 (0.65-2.04)    |               | -                       | 1.21 (0.75-1.93)    |               | 0.79 (0.43-1.47)    | 1.37 (0.71-2.67)    |               | 1.12 (0.69-1.84)              | -                          |               | 50.0-88.3                                                            |
| 0.98 (0.56-1.73)    | 0.961         | -                       | 1.08 (0.67-1.74)    | -             | 0.86 (0.47-1.58)    | 1.16 (0.60-2.25)    | 0.44          | 0.99 (0.60-1.65)              | -                          | -             | 88.5-96.6                                                            |
| 1.36 (0.80-2.33)    |               | -                       | 1.52 (0.97-2.40)    |               | 1.06 (0.58-1.93)    | 1.73 (0.92-3.26)    |               | 1.00 (0.59-1.70)              | -                          |               | 96.8-105.5                                                           |
| 0.221               |               | -                       | 0.068               |               | 0.672               | 0.085               |               | 0.831                         | -                          |               | 105.6-216.6                                                          |
|                     |               |                         |                     |               |                     |                     |               |                               |                            |               | p-trend                                                              |
| 1 (referent)        |               | 1 (referent)            | 1 (referent)        |               | 1 (referent)        | 1 (referent)        |               | -                             | -                          |               | Hypertension (SBP >= 140 mmHg, or DBP >= 90 mmHg, or self-reported)  |
| 1.36 (0.98-1.89)    | 0.717         | 1.46 (0.47-4.57)        | 1.38 (1.03-1.84)    | 0.765         | 1.01 (0.67-1.54)    | 1.67 (1.15-2.44)    | 0.087         | 1 (referent)                  | 2.29 (1.55-3.38)           |               | Normotensive<br>Hypertensive                                         |

| Esophagus                                                            |        | Excluding first 2 years of follow-up |                     |                     | Men                 | Women               | Sex                 | BMI <= 25 mg/m <sup>2</sup> | BMI > 25 mg/m <sup>2</sup> | BMI                 | Age <= 53 yrs |                     |
|----------------------------------------------------------------------|--------|--------------------------------------|---------------------|---------------------|---------------------|---------------------|---------------------|-----------------------------|----------------------------|---------------------|---------------|---------------------|
| Cases                                                                | Cohort | HR (crude)                           | HR (adjusted)       | HR (adjusted)       | HR (adjusted)       | HR (adjusted)       | p-interaction       | HR (adjusted)               | HR (adjusted)              | p-interaction       | HR (adjusted) |                     |
| Cases                                                                |        | 387                                  | 387                 | 344                 | 257                 | 130                 |                     | 153                         | 234                        |                     | 110           |                     |
| Cohort size                                                          |        | 307318                               | 307318              | 301857              | 112591              | 194727              |                     | 146326                      | 160992                     |                     | 153303        |                     |
| Mean Systolic Blood Pressure continuous (per 10mmHg increase)        | 387    | 307318                               | 1.122 (1.067-1.180) | 1.087 (1.030-1.146) | 1.088 (1.028-1.151) | 1.101 (1.031-1.177) | 1.060 (0.970-1.160) | 0.757                       | 1.048 (0.961-1.142)        | 1.108 (1.036-1.184) | 0.489         | 1.139 (1.022-1.271) |
| Mean Diastolic Blood Pressure continuous (per 10mmHg increase)       | 387    | 307318                               | 1.233 (1.128-1.349) | 1.147 (1.043-1.261) | 1.162 (1.052-1.284) | 1.160 (1.033-1.302) | 1.118 (0.947-1.320) | 0.626                       | 1.093 (0.936-1.277)        | 1.179 (1.048-1.326) | 0.711         | 1.172 (0.976-1.406) |
| Mean Blood Pressure (1/3SBP+2/3DBP) continuous (per 10mmHg increase) | 387    | 307318                               | 1.207 (1.119-1.303) | 1.139 (1.051-1.235) | 1.148 (1.053-1.250) | 1.157 (1.047-1.278) | 1.104 (0.961-1.268) | 0.672                       | 1.081 (0.949-1.233)        | 1.171 (1.059-1.296) | 0.564         | 1.190 (1.014-1.395) |
| Systolic Blood Pressure (mmHg) ESH classification                    |        |                                      |                     |                     |                     |                     |                     |                             |                            |                     |               |                     |
| < 120                                                                | 56     | 86141                                | 1 (referent)        |                             | 1 (referent)               | 1 (referent)        |               | 1 (referent)        |
| 120-129                                                              | 57     | 66446                                | 0.99 (0.68-1.43)    | 0.89 (0.61-1.29)    | 0.89 (0.60-1.31)    | 0.88 (0.54-1.44)    | 0.87 (0.48-1.57)    |                             | 0.64 (0.38-1.08)           | 1.26 (0.71-2.23)    |               | 0.73 (0.38-1.38)    |
| 130-139                                                              | 81     | 57482                                | 1.39 (0.98-1.96)    | 1.17 (0.82-1.67)    | 1.19 (0.82-1.72)    | 1.13 (0.71-1.79)    | 1.23 (0.71-2.13)    |                             | 0.77 (0.46-1.28)           | 1.70 (0.99-2.92)    |               | 1.18 (0.65-2.14)    |
| 140-159                                                              | 116    | 68235                                | 1.37 (0.98-1.91)    | 1.11 (0.79-1.57)    | 1.14 (0.80-1.63)    | 1.11 (0.71-1.72)    | 1.12 (0.66-1.92)    | 0.643                       | 0.98 (0.62-1.56)           | 1.39 (0.82-2.37)    | 0.621         | 1.17 (0.64-2.13)    |
| 160-179                                                              | 54     | 22656                                | 1.78 (1.20-2.64)    | 1.43 (0.96-2.14)    | 1.37 (0.89-2.11)    | 1.57 (0.95-2.61)    | 1.11 (0.56-2.22)    |                             | 1.29 (0.71-2.36)           | 1.79 (1.00-3.23)    |               | 1.95 (0.92-4.15)    |
| >= 180                                                               | 23     | 6358                                 | 2.70 (1.63-4.46)    | 2.10 (1.26-3.52)    | 2.14 (1.24-3.70)    | 2.27 (1.21-4.27)    | 1.71 (0.67-4.32)    |                             | 1.27 (0.49-3.34)           | 2.96 (1.50-5.84)    |               | 3.52 (1.27-9.79)    |
| p-trend                                                              |        |                                      | 0.00003             | 0.005               | 0.009               | 0.006               | 0.309               |                             | 0.253                      | 0.008               |               | 0.015               |
| Diastolic Blood Pressure (mmHg) ESH classification                   |        |                                      |                     |                     |                     |                     |                     |                             |                            |                     |               |                     |
| < 80                                                                 | 113    | 132590                               | 1 (referent)        |                             | 1 (referent)               | 1 (referent)        |               | 1 (referent)        |
| 80-84                                                                | 76     | 64872                                | 1.21 (0.90-1.62)    | 1.13 (0.84-1.51)    | 1.22 (0.89-1.67)    | 1.09 (0.75-1.59)    | 1.19 (0.74-1.91)    |                             | 1.22 (0.80-1.89)           | 1.03 (0.69-1.54)    |               | 0.98 (0.55-1.72)    |
| 85-89                                                                | 64     | 41500                                | 1.43 (1.05-1.95)    | 1.28 (0.94-1.76)    | 1.36 (0.98-1.90)    | 1.24 (0.84-1.83)    | 1.35 (0.80-2.30)    |                             | 1.37 (0.84-2.22)           | 1.18 (0.78-1.77)    |               | 1.38 (0.77-2.47)    |
| 90-99                                                                | 97     | 51196                                | 1.72 (1.31-2.27)    | 1.45 (1.09-1.93)    | 1.54 (1.14-2.09)    | 1.39 (0.97-1.98)    | 1.59 (0.98-2.58)    | 0.806                       | 1.48 (0.95-2.33)           | 1.41 (0.98-2.03)    | 0.95          | 1.64 (0.96-2.78)    |
| 100-109                                                              | 30     | 13896                                | 1.89 (1.26-2.83)    | 1.51 (0.99-2.29)    | 1.45 (0.91-2.29)    | 1.55 (0.95-2.53)    | 1.33 (0.56-3.16)    |                             | 1.14 (0.48-2.66)           | 1.65 (1.01-2.69)    |               | 1.14 (0.46-2.80)    |
| >= 110                                                               | 7      | 3264                                 | 1.85 (0.86-3.99)    | 1.39 (0.64-3.01)    | 1.66 (0.76-3.61)    | 1.65 (0.75-3.64)    | no cases            |                             | 0.95 (0.13-6.94)           | 1.50 (0.64-3.50)    |               | 1.48 (0.35-6.34)    |
| p-trend                                                              |        |                                      | 0.000007            | 0.005               | 0.004               | 0.017               | 0.137               |                             | 0.145                      | 0.012               |               | 0.101               |
| Systolic Blood Pressure (mmHg) ASH classification                    |        |                                      |                     |                     |                     |                     |                     |                             |                            |                     |               |                     |
| < 120                                                                | 56     | 86141                                | 1 (referent)        |                             | 1 (referent)               | 1 (referent)        |               | 1 (referent)        |
| 120-139                                                              | 138    | 123928                               | 1.18 (0.86-1.62)    | 1.03 (0.75-1.42)    | 1.04 (0.74-1.45)    | 1.01 (0.66-1.54)    | 1.04 (0.64-1.70)    |                             | 0.70 (0.45-1.08)           | 1.49 (0.89-2.49)    |               | 0.93 (0.55-1.58)    |
| 140-159                                                              | 116    | 68235                                | 1.36 (0.97-1.89)    | 1.10 (0.78-1.55)    | 1.12 (0.79-1.61)    | 1.09 (0.70-1.70)    | 1.11 (0.65-1.90)    | 0.572                       | 0.98 (0.61-1.55)           | 1.38 (0.81-2.35)    | 0.828         | 1.15 (0.63-2.09)    |
| >= 160                                                               | 77     | 29014                                | 1.96 (1.36-2.82)    | 1.56 (1.07-2.27)    | 1.52 (1.02-2.27)    | 1.71 (1.06-2.76)    | 1.22 (0.65-2.30)    |                             | 1.28 (0.73-2.25)           | 2.04 (1.17-3.56)    |               | 2.19 (1.09-4.37)    |
| p-trend                                                              |        |                                      | 0.0002              | 0.016               | 0.032               | 0.013               | 0.511               |                             | 0.271                      | 0.029               |               | 0.038               |
| Diastolic Blood Pressure (mmHg) ASH classification                   |        |                                      |                     |                     |                     |                     |                     |                             |                            |                     |               |                     |
| < 80                                                                 | 113    | 132590                               | 1 (referent)        |                             | 1 (referent)               | 1 (referent)        |               | 1 (referent)        |
| 80-89                                                                | 140    | 106372                               | 1.30 (1.02-1.67)    | 1.19 (0.92-1.54)    | 1.28 (0.98-1.68)    | 1.16 (0.83-1.60)    | 1.25 (0.83-1.89)    |                             | 1.28 (0.88-1.86)           | 1.10 (0.78-1.54)    |               | 1.14 (0.71-1.83)    |
| 90-99                                                                | 97     | 51196                                | 1.72 (1.31-2.27)    | 1.45 (1.09-1.93)    | 1.54 (1.14-2.08)    | 1.39 (0.97-1.98)    | 1.59 (0.98-2.58)    | 0.841                       | 1.48 (0.94-2.33)           | 1.41 (0.98-2.03)    | 0.967         | 1.63 (0.96-2.76)    |
| >= 100                                                               | 37     | 17160                                | 1.88 (1.29-2.74)    | 1.48 (1.01-2.18)    | 1.49 (0.98-2.26)    | 1.57 (1.00-2.46)    | 1.11 (0.47-2.62)    |                             | 1.11 (0.50-2.45)           | 1.61 (1.03-2.54)    |               | 1.20 (0.53-2.69)    |
| p-trend                                                              |        |                                      | 0.00001             | 0.007               | 0.006               | 0.022               | 0.147               |                             | 0.169                      | 0.013               |               | 0.178               |
| Mean BP (mmHg) (1/3SBP+2/3DBP) Cohort-specific quartiles             |        |                                      |                     |                     |                     |                     |                     |                             |                            |                     |               |                     |
| 50.0-88.3                                                            | 51     | 76991                                | 1 (referent)        |                             | 1 (referent)               | 1 (referent)        |               | 1 (referent)        |
| 88.5-96.6                                                            | 79     | 77727                                | 1.21 (0.85-1.72)    | 1.10 (0.77-1.57)    | 1.16 (0.79-1.69)    | 1.08 (0.67-1.75)    | 1.10 (0.64-1.89)    |                             | 0.75 (0.46-1.22)           | 1.61 (0.91-2.85)    |               | 1.03 (0.56-1.88)    |
| 96.8-105.5                                                           | 95     | 76327                                | 1.24 (0.88-1.75)    | 1.05 (0.74-1.50)    | 1.09 (0.75-1.59)    | 0.97 (0.61-1.56)    | 1.21 (0.71-2.05)    | 0.48                        | 0.93 (0.58-1.49)           | 1.29 (0.74-2.27)    | 0.801         | 0.93 (0.49-1.75)    |
| 105.6-216.6                                                          | 162    | 76273                                | 1.80 (1.30-2.50)    | 1.43 (1.02-2.01)    | 1.49 (1.04-2.14)    | 1.52 (0.97-2.38)    | 1.20 (0.70-2.06)    |                             | 1.17 (0.74-1.86)           | 1.84 (1.08-3.15)    |               | 1.59 (0.87-2.92)    |
| p-trend                                                              |        |                                      | 0.0001              | 0.022               | 0.021               | 0.02                | 0.467               |                             | 0.299                      | 0.039               |               | 0.108               |
| Hypertension (SBP >= 140 mmHg, or DBP >= 90 mmHg, or self-reported)  |        |                                      |                     |                     |                     |                     |                     |                             |                            |                     |               |                     |
| Normotensive                                                         | 160    | 174179                               | 1 (referent)        |                             | 1 (referent)               | 1 (referent)        |               | 1 (referent)        |
| Hypertensive                                                         | 227    | 133139                               | 1.32 (1.07-1.63)    | 1.20 (0.97-1.49)    | 1.20 (0.96-1.51)    | 1.22 (0.94-1.60)    | 1.17 (0.81-1.70)    | 0.994                       | 1.18 (0.85-1.65)           | 1.22 (0.92-1.61)    | 0.918         | 1.23 (0.82-1.83)    |

| Age > 53 yrs                                                                                                              | Age           | Never smokers                                                                                                             | Ever smokers                                                                                                              | Smoking       | Alcohol <= 12g                                                                                                            | Alcohol > 12g                                                                                                               | Alcohol       | No antihypertensive treatment                                                                                             | Antihypertensive treatment                                                                                                | Treatment     | Esophagus                                                                                           |
|---------------------------------------------------------------------------------------------------------------------------|---------------|---------------------------------------------------------------------------------------------------------------------------|---------------------------------------------------------------------------------------------------------------------------|---------------|---------------------------------------------------------------------------------------------------------------------------|-----------------------------------------------------------------------------------------------------------------------------|---------------|---------------------------------------------------------------------------------------------------------------------------|---------------------------------------------------------------------------------------------------------------------------|---------------|-----------------------------------------------------------------------------------------------------|
| HR (adjusted)                                                                                                             | p-interaction | HR (adjusted)                                                                                                             | HR (adjusted)                                                                                                             | p-interaction | HR (adjusted)                                                                                                             | HR (adjusted)                                                                                                               | p-interaction | HR (adjusted)                                                                                                             | HR (adjusted)                                                                                                             | p-interaction |                                                                                                     |
| 277<br>154015                                                                                                             |               | 82<br>141931                                                                                                              | 298<br>160623                                                                                                             |               | 202<br>205214                                                                                                             | 185<br>102104                                                                                                               |               | 233<br>227336                                                                                                             | 37<br>37017                                                                                                               |               | Cases<br>Cohort size                                                                                |
| 1.069 (1.005-1.136)                                                                                                       | 0.086         | 1.111 (0.989-1.249)                                                                                                       | 1.085 (1.021-1.153)                                                                                                       | 0.552         | 1.016 (0.940-1.098)                                                                                                       | 1.161 (1.079-1.249)                                                                                                         | 0.012         | 1.123 (1.046-1.206)                                                                                                       | 1.184 (1.009-1.389)                                                                                                       | 0.56          | Mean Systolic Blood Pressure continuous (per 10mmHg increase)                                       |
| 1.132 (1.013-1.265)                                                                                                       | 0.305         | 1.185 (0.964-1.458)                                                                                                       | 1.135 (1.019-1.265)                                                                                                       | 0.944         | 0.968 (0.844-1.109)                                                                                                       | 1.360 (1.195-1.547)                                                                                                         | 0.0006        | 1.241 (1.092-1.411)                                                                                                       | 1.099 (0.793-1.524)                                                                                                       | 0.366         | Mean Diastolic Blood Pressure continuous (per 10mmHg increase)                                      |
| 1.118 (1.018-1.228)                                                                                                       | 0.16          | 1.178 (0.987-1.406)                                                                                                       | 1.132 (1.032-1.241)                                                                                                       | 0.786         | 0.996 (0.886-1.119)                                                                                                       | 1.304 (1.167-1.459)                                                                                                         | 0.001         | 1.218 (1.092-1.359)                                                                                                       | 1.221 (0.933-1.597)                                                                                                       | 0.913         | Mean Blood Pressure (1/3SBP+2/3DBP) continuous (per 10mmHg increase)                                |
| 1 (referent)<br>0.95 (0.59-1.50)<br>1.12 (0.72-1.74)<br>1.05 (0.69-1.59)<br>1.27 (0.78-2.04)<br>1.83 (1.00-3.33)<br>0.083 | 0.062         | 1 (referent)<br>0.43 (0.18-1.02)<br>0.88 (0.43-1.80)<br>0.74 (0.36-1.49)<br>1.04 (0.46-2.37)<br>2.51 (0.96-6.59)<br>0.161 | 1 (referent)<br>1.01 (0.66-1.56)<br>1.28 (0.85-1.94)<br>1.27 (0.85-1.89)<br>1.58 (0.99-2.52)<br>2.02 (1.09-3.72)<br>0.009 | 0.757         | 1 (referent)<br>0.81 (0.50-1.31)<br>1.13 (0.72-1.78)<br>0.96 (0.62-1.50)<br>1.07 (0.61-1.87)<br>1.07 (0.44-2.61)<br>0.647 | 1 (referent)<br>1.04 (0.57-1.89)<br>1.25 (0.70-2.22)<br>1.39 (0.81-2.39)<br>1.99 (1.08-3.65)<br>3.61 (1.80-7.25)<br>0.0003  | 0.018         | 1 (referent)<br>0.82 (0.52-1.30)<br>1.15 (0.75-1.77)<br>1.24 (0.81-1.88)<br>1.59 (0.94-2.71)<br>2.51 (1.24-5.06)<br>0.005 | two cases in referent<br>-<br>-<br>-<br>-<br>-<br>-                                                                       | -             | < 120<br>120-129<br>130-139<br>140-159<br>160-179<br>>= 180<br>p-trend                              |
| 1 (referent)<br>1.18 (0.83-1.67)<br>1.24 (0.85-1.80)<br>1.37 (0.98-1.92)<br>1.61 (1.01-2.59)<br>1.32 (0.53-3.30)<br>0.026 | 0.348         | 1 (referent)<br>1.05 (0.55-2.00)<br>1.43 (0.75-2.75)<br>1.31 (0.69-2.48)<br>2.23 (0.98-5.06)<br>1.10 (0.15-8.28)<br>0.106 | 1 (referent)<br>1.19 (0.85-1.66)<br>1.19 (0.82-1.72)<br>1.51 (1.09-2.09)<br>1.35 (0.83-2.19)<br>1.49 (0.64-3.46)<br>0.021 | 0.938         | 1 (referent)<br>0.94 (0.64-1.39)<br>1.04 (0.68-1.59)<br>1.00 (0.68-1.49)<br>1.06 (0.57-1.97)<br>1.10 (0.15-8.28)<br>0.723 | 1 (referent)<br>1.50 (0.94-2.41)<br>1.82 (1.12-2.95)<br>2.30 (1.49-3.57)<br>2.38 (1.32-4.30)<br>3.66 (1.59-8.43)<br>0.00001 | 0.001         | 1 (referent)<br>1.25 (0.86-1.81)<br>1.54 (1.04-2.28)<br>1.65 (1.13-2.41)<br>1.87 (1.04-3.39)<br>2.31 (0.83-6.42)<br>0.001 | 1 (referent)<br>0.85 (0.21-3.47)<br>0.85 (0.21-3.52)<br>1.52 (0.48-4.81)<br>1.45 (0.39-5.38)<br>0.95 (0.10-8.90)<br>0.361 | 0.635         | < 80<br>80-84<br>85-89<br>90-99<br>100-109<br>>= 110<br>p-trend                                     |
| 1 (referent)<br>1.04 (0.69-1.55)<br>1.04 (0.69-1.58)<br>1.38 (0.88-2.17)<br>0.141                                         | 0.084         | 1 (referent)<br>0.65 (0.34-1.25)<br>0.72 (0.36-1.45)<br>1.28 (0.61-2.71)<br>0.372                                         | 1 (referent)<br>1.15 (0.79-1.67)<br>1.25 (0.84-1.87)<br>1.66 (1.07-2.58)<br>0.019                                         | 0.961         | 1 (referent)<br>0.97 (0.65-1.45)<br>0.95 (0.61-1.48)<br>1.05 (0.62-1.79)<br>0.907                                         | 1 (referent)<br>1.14 (0.68-1.94)<br>1.37 (0.80-2.36)<br>2.33 (1.31-4.12)<br>0.0007                                          | 0.017         | 1 (referent)<br>0.98 (0.67-1.44)<br>1.22 (0.80-1.85)<br>1.76 (1.08-2.86)<br>0.014                                         | two cases in referent<br>-<br>-<br>-<br>-                                                                                 | -             | < 120<br>120-139<br>140-159<br>>= 160<br>p-trend                                                    |
| 1 (referent)<br>1.21 (0.89-1.63)<br>1.37 (0.98-1.92)<br>1.55 (1.00-2.42)<br>0.023                                         | 0.495         | 1 (referent)<br>1.21 (0.71-2.07)<br>1.30 (0.69-2.47)<br>1.99 (0.91-4.39)<br>0.116                                         | 1 (referent)<br>1.19 (0.89-1.60)<br>1.51 (1.09-2.09)<br>1.38 (0.88-2.15)<br>0.021                                         | 0.898         | 1 (referent)<br>0.98 (0.71-1.36)<br>1.00 (0.68-1.49)<br>0.84 (0.45-1.56)<br>0.734                                         | 1 (referent)<br>1.64 (1.08-2.48)<br>2.30 (1.48-3.57)<br>2.63 (1.54-4.50)<br>0.00003                                         | 0.002         | 1 (referent)<br>1.36 (0.99-1.88)<br>1.64 (1.13-2.40)<br>1.95 (1.14-3.34)<br>0.002                                         | 1 (referent)<br>0.85 (0.25-2.90)<br>1.52 (0.48-4.80)<br>1.36 (0.38-4.88)<br>0.337                                         | 0.719         | < 80<br>80-89<br>90-99<br>>= 100<br>p-trend                                                         |
| 1 (referent)<br>1.11 (0.71-1.72)<br>1.06 (0.69-1.63)<br>1.34 (0.89-2.02)<br>0.116                                         | 0.213         | 1 (referent)<br>0.80 (0.38-1.67)<br>0.93 (0.46-1.89)<br>1.15 (0.58-2.28)<br>0.471                                         | 1 (referent)<br>1.20 (0.79-1.81)<br>1.08 (0.72-1.64)<br>1.54 (1.03-2.29)<br>0.025                                         | 0.637         | 1 (referent)<br>1.20 (0.78-1.86)<br>1.00 (0.64-1.57)<br>1.02 (0.65-1.60)<br>0.757                                         | 1 (referent)<br>0.94 (0.51-1.74)<br>1.16 (0.65-2.06)<br>2.02 (1.17-3.47)<br>0.0002                                          | 0.003         | 1 (referent)<br>1.04 (0.67-1.62)<br>1.17 (0.76-1.81)<br>1.63 (1.06-2.51)<br>0.01                                          | two cases in referent<br>-<br>-<br>-<br>-                                                                                 | -             | 50.0-88.3<br>88.5-96.6<br>96.8-105.5<br>105.6-216.6<br>p-trend                                      |
| 1 (referent)<br>1.17 (0.91-1.51)                                                                                          | 0.42          | 1 (referent)<br>1.38 (0.85-2.23)                                                                                          | 1 (referent)<br>1.16 (0.91-1.49)                                                                                          | 0.436         | 1 (referent)<br>1.05 (0.78-1.40)                                                                                          | 1 (referent)<br>1.43 (1.04-1.97)                                                                                            | 0.176         | -<br>1 (referent)                                                                                                         | -<br>0.84 (0.57-1.23)                                                                                                     | -             | Hypertension (SBP >= 140 mmHg, or DBP >= 90 mmHg, or self-reported)<br>Normotensive<br>Hypertensive |

| Esophageal AC                                                                    |        | Excluding first 2 years of follow-up |                     |                     | Men                 | Women               | Sex                 | BMI <= 25 mg/m <sup>2</sup> | BMI > 25 mg/m <sup>2</sup> | BMI                 | Age <= 53 yrs |                     |
|----------------------------------------------------------------------------------|--------|--------------------------------------|---------------------|---------------------|---------------------|---------------------|---------------------|-----------------------------|----------------------------|---------------------|---------------|---------------------|
| Cases                                                                            | Cohort | HR (crude)                           | HR (adjusted)       | HR (adjusted)       | HR (adjusted)       | HR (adjusted)       | p-interaction       | HR (adjusted)               | HR (adjusted)              | p-interaction       | HR (adjusted) |                     |
| Cases                                                                            |        | 176                                  | 176                 | 160                 | 139                 | 37                  |                     | 52                          | 124                        |                     | 47            |                     |
| Cohort size                                                                      |        | 307318                               | 307318              | 301857              | 112591              | 194727              |                     | 146326                      | 160992                     |                     | 153303        |                     |
| <b>Mean Systolic Blood Pressure continuous (per 10mmHg increase)</b>             | 176    | 307318                               | 1.112 (1.031-1.200) | 1.040 (0.958-1.128) | 1.014 (0.929-1.107) | 1.062 (0.969-1.164) | 0.956 (0.799-1.144) | 0.641                       | 0.925 (0.788-1.085)        | 1.096 (0.998-1.204) | 0.238         | 1.006 (0.839-1.207) |
| <b>Mean Diastolic Blood Pressure continuous (per 10mmHg increase)</b>            | 176    | 307318                               | 1.251 (1.098-1.426) | 1.078 (0.936-1.241) | 1.059 (0.912-1.229) | 1.080 (0.922-1.266) | 1.036 (0.755-1.421) | 0.963                       | 1.002 (0.769-1.304)        | 1.132 (0.960-1.333) | 0.71          | 0.987 (0.739-1.318) |
| <b>Mean Blood Pressure (1/3SBP+2/3DBP) continuous (per 10mmHg increase)</b>      | 176    | 307318                               | 1.208 (1.079-1.352) | 1.069 (0.946-1.207) | 1.040 (0.913-1.184) | 1.087 (0.947-1.246) | 0.982 (0.748-1.289) | 0.83                        | 0.947 (0.752-1.192)        | 1.139 (0.989-1.311) | 0.413         | 0.997 (0.769-1.293) |
| <b>Systolic Blood Pressure (mmHg) ESH classification</b>                         |        |                                      |                     |                     |                     |                     |                     |                             |                            |                     |               |                     |
| < 120                                                                            | 26     | 86141                                | 1 (referent)        |                             | 1 (referent)               | 1 (referent)        |               | 1 (referent)        |
| 120-129                                                                          | 22     | 66446                                | 0.83 (0.47-1.46)    | 0.64 (0.36-1.14)    | 0.64 (0.36-1.16)    | 0.66 (0.35-1.27)    | 0.52 (0.15-1.81)    |                             | 0.51 (0.22-1.22)           | 0.81 (0.37-1.80)    |               | 0.56 (0.21-1.48)    |
| 130-139                                                                          | 35     | 57482                                | 1.28 (0.76-2.15)    | 0.89 (0.53-1.50)    | 0.91 (0.54-1.56)    | 0.79 (0.43-1.46)    | 1.17 (0.43-3.20)    |                             | 0.49 (0.20-1.20)           | 1.31 (0.64-2.67)    |               | 0.83 (0.34-2.05)    |
| 140-159                                                                          | 57     | 68235                                | 1.41 (0.87-2.30)    | 0.91 (0.55-1.50)    | 0.89 (0.54-1.49)    | 0.93 (0.53-1.64)    | 0.78 (0.28-2.21)    | 0.828                       | 0.60 (0.27-1.32)           | 1.29 (0.65-2.55)    | 0.308         | 1.02 (0.43-2.44)    |
| 160-179                                                                          | 26     | 22656                                | 1.76 (0.99-3.13)    | 1.09 (0.61-1.96)    | 1.09 (0.61-1.96)    | 1.13 (0.58-2.21)    | 0.88 (0.25-3.05)    |                             | 1.01 (0.38-2.65)           | 1.43 (0.66-3.10)    |               | 1.13 (0.33-3.86)    |
| >= 180                                                                           | 10     | 6358                                 | 2.41 (1.12-5.15)    | 1.43 (0.66-3.10)    | 1.29 (0.56-3.98)    | 1.63 (0.70-3.79)    | 0.67 (0.08-5.87)    |                             | 0.49 (0.06-3.85)           | 2.29 (0.91-5.75)    |               | 1.22 (0.15-10.10)   |
| p-trend                                                                          |        |                                      | 0.002               | 0.212               | 0.522               | 0.153               | 0.925               |                             | 0.615                      | 0.043               |               | 0.531               |
| <b>Diastolic Blood Pressure (mmHg) ESH classification</b>                        |        |                                      |                     |                     |                     |                     |                     |                             |                            |                     |               |                     |
| < 80                                                                             | 49     | 132590                               | 1 (referent)        |                             | 1 (referent)               | 1 (referent)        |               | 1 (referent)        |
| 80-84                                                                            | 36     | 64872                                | 1.35 (0.88-2.09)    | 1.12 (0.73-1.74)    | 1.23 (0.78-1.93)    | 1.13 (0.69-1.86)    | 1.01 (0.40-2.57)    |                             | 0.98 (0.45-2.10)           | 1.23 (0.72-2.11)    |               | 0.98 (0.42-2.31)    |
| 85-89                                                                            | 34     | 41500                                | 1.79 (1.15-2.78)    | 1.36 (0.87-2.13)    | 1.45 (0.91-2.31)    | 1.29 (0.78-2.16)    | 1.51 (0.59-3.88)    |                             | 1.87 (0.91-3.85)           | 1.23 (0.70-2.16)    |               | 1.60 (0.69-3.72)    |
| 90-99                                                                            | 37     | 51196                                | 1.53 (0.99-2.37)    | 1.06 (0.68-1.66)    | 1.08 (0.68-1.73)    | 0.98 (0.59-1.62)    | 1.34 (0.53-3.37)    | 0.652                       | 0.88 (0.37-2.10)           | 1.18 (0.70-1.99)    | 0.699         | 1.16 (0.49-2.74)    |
| 100-109                                                                          | 18     | 13896                                | 2.62 (1.52-4.53)    | 1.68 (0.96-2.94)    | 1.51 (0.81-2.81)    | 1.72 (0.94-3.18)    | 1.38 (0.30-6.27)    |                             | 0.89 (0.21-3.86)           | 2.06 (1.10-3.86)    |               | 1.47 (0.45-4.77)    |
| >= 110                                                                           | 2      | 3264                                 | 1.18 (0.29-4.88)    | 0.66 (0.16-2.74)    | 0.77 (0.18-3.21)    | 0.72 (0.17-3.02)    | no cases            |                             | no cases                   | 0.86 (0.20-3.64)    |               | no cases            |
| p-trend                                                                          |        |                                      | 0.002               | 0.353               | 0.487               | 0.504               | 0.548               |                             | 0.997                      | 0.19                |               | 0.665               |
| <b>Systolic Blood Pressure (mmHg) ASH classification</b>                         |        |                                      |                     |                     |                     |                     |                     |                             |                            |                     |               |                     |
| < 120                                                                            | 26     | 86141                                | 1 (referent)        |                             | 1 (referent)               | 1 (referent)        |               | 1 (referent)        |
| 120-139                                                                          | 57     | 123928                               | 1.05 (0.65-1.68)    | 0.77 (0.48-1.24)    | 0.78 (0.48-1.27)    | 0.73 (0.42-1.27)    | 0.85 (0.34-2.17)    |                             | 0.50 (0.24-1.04)           | 1.08 (0.55-2.11)    |               | 0.69 (0.31-1.52)    |
| 140-159                                                                          | 57     | 68235                                | 1.40 (0.86-2.27)    | 0.90 (0.55-1.48)    | 0.88 (0.53-1.47)    | 0.92 (0.52-1.63)    | 0.76 (0.27-2.16)    | 0.685                       | 0.60 (0.27-1.32)           | 1.27 (0.64-2.52)    | 0.472         | 1.01 (0.42-2.40)    |
| >= 160                                                                           | 36     | 29014                                | 1.87 (1.09-3.22)    | 1.15 (0.66-2.00)    | 0.98 (0.54-1.76)    | 1.23 (0.66-2.31)    | 0.81 (0.25-2.67)    |                             | 0.89 (0.35-2.27)           | 1.60 (0.76-3.33)    |               | 1.12 (0.35-3.56)    |
| p-trend                                                                          |        |                                      | 0.007               | 0.326               | 0.779               | 0.197               | 0.69                |                             | 0.738                      | 0.111               |               | 0.654               |
| <b>Diastolic Blood Pressure (mmHg) ASH classification</b>                        |        |                                      |                     |                     |                     |                     |                     |                             |                            |                     |               |                     |
| < 80                                                                             | 49     | 132590                               | 1 (referent)        |                             | 1 (referent)               | 1 (referent)        |               | 1 (referent)        |
| 80-89                                                                            | 70     | 106372                               | 1.53 (1.06-2.22)    | 1.23 (0.84-1.78)    | 1.32 (0.90-1.95)    | 1.20 (0.78-1.84)    | 1.21 (0.56-2.63)    |                             | 1.32 (0.72-2.44)           | 1.23 (0.77-1.97)    |               | 1.23 (0.60-2.51)    |
| 90-99                                                                            | 37     | 51196                                | 1.53 (0.99-2.36)    | 1.06 (0.68-1.65)    | 1.08 (0.68-1.72)    | 0.98 (0.59-1.62)    | 1.34 (0.53-3.36)    | 0.753                       | 0.87 (0.37-2.09)           | 1.18 (0.70-1.99)    | 0.442         | 1.15 (0.49-2.71)    |
| >= 100                                                                           | 20     | 17160                                | 2.33 (1.38-3.95)    | 1.45 (0.85-2.49)    | 1.34 (0.74-2.43)    | 1.49 (0.83-2.68)    | 1.09 (0.24-4.99)    |                             | 0.72 (0.17-3.11)           | 1.78 (0.97-3.27)    |               | 1.15 (0.35-3.71)    |
| p-trend                                                                          |        |                                      | 0.002               | 0.338               | 0.494               | 0.442               | 0.631               |                             | 0.752                      | 0.121               |               | 0.773               |
| <b>Mean BP (mmHg) (1/3SBP+2/3DBP) Cohort-specific quartiles</b>                  |        |                                      |                     |                     |                     |                     |                     |                             |                            |                     |               |                     |
| 50.0-88.3                                                                        | 20     | 76991                                | 1 (referent)        |                             | 1 (referent)               | 1 (referent)        |               | 1 (referent)        |
| 88.5-96.6                                                                        | 40     | 77727                                | 1.61 (0.93-2.76)    | 1.27 (0.74-2.19)    | 1.28 (0.73-2.23)    | 1.31 (0.69-2.46)    | 1.02 (0.35-2.97)    |                             | 0.86 (0.39-1.91)           | 1.77 (0.80-3.92)    |               | 1.09 (0.44-2.68)    |
| 96.8-105.5                                                                       | 39     | 76327                                | 1.33 (0.77-2.29)    | 0.91 (0.52-1.59)    | 0.91 (0.51-1.61)    | 0.79 (0.41-1.53)    | 1.26 (0.45-3.49)    | 0.98                        | 0.64 (0.27-1.52)           | 1.28 (0.58-2.82)    | 0.745         | 0.72 (0.26-1.94)    |
| 105.6-216.6                                                                      | 77     | 76273                                | 2.19 (1.31-3.65)    | 1.32 (0.78-2.23)    | 1.26 (0.73-2.18)    | 1.38 (0.75-2.54)    | 0.94 (0.32-2.73)    |                             | 1.00 (0.46-2.19)           | 1.82 (0.85-3.86)    |               | 1.29 (0.50-3.28)    |
| p-trend                                                                          |        |                                      | 0.003               | 0.415               | 0.595               | 0.382               | 0.953               |                             | 0.931                      | 0.226               |               | 0.694               |
| <b>Hypertension (SBP &gt;= 140 mmHg, or DBP &gt;= 90 mmHg, or self-reported)</b> |        |                                      |                     |                     |                     |                     |                     |                             |                            |                     |               |                     |
| Normotensive                                                                     | 70     | 174179                               | 1 (referent)        |                             | 1 (referent)               | 1 (referent)        |               | 1 (referent)        |
| Hypertensive                                                                     | 106    | 133139                               | 1.38 (1.01-1.89)    | 1.11 (0.80-1.52)    | 1.01 (0.73-1.41)    | 1.15 (0.80-1.66)    | 0.97 (0.48-1.96)    | 0.868                       | 1.03 (0.58-1.82)           | 1.18 (0.81-1.74)    | 0.865         | 1.22 (0.66-2.25)    |

| Age > 53 yrs        | Age           | Never smokers       | Ever smokers        | Smoking       | Alcohol <= 12g      | Alcohol > 12g       | Alcohol       | No antihypertensive treatment | Antihypertensive treatment | Treatment     | Esophageal AC                                                        |
|---------------------|---------------|---------------------|---------------------|---------------|---------------------|---------------------|---------------|-------------------------------|----------------------------|---------------|----------------------------------------------------------------------|
| HR (adjusted)       | p-interaction | HR (adjusted)       | HR (adjusted)       | p-interaction | HR (adjusted)       | HR (adjusted)       | p-interaction | HR (adjusted)                 | HR (adjusted)              | p-interaction |                                                                      |
| 129<br>154015       |               | 45<br>141931        | 128<br>160623       |               | 105<br>205214       | 71<br>102104        |               | 94<br>227336                  | 12<br>37017                |               | Cases<br>Cohort size                                                 |
| 1.043 (0.952-1.144) | 0.815         | 1.061 (0.901-1.249) | 1.037 (0.943-1.141) | 0.61          | 1.007 (0.903-1.122) | 1.080 (0.955-1.223) | 0.238         | 1.051 (0.935-1.181)           | 1.400 (1.029-1.905)        | 0.162         | Mean Systolic Blood Pressure continuous (per 10mmHg increase)        |
| 1.100 (0.936-1.293) | 0.899         | 1.128 (0.851-1.496) | 1.059 (0.898-1.249) | 0.737         | 1.009 (0.838-1.214) | 1.171 (0.942-1.457) | 0.284         | 1.093 (0.888-1.346)           | 1.383 (0.730-2.622)        | 0.542         | Mean Diastolic Blood Pressure continuous (per 10mmHg increase)       |
| 1.082 (0.942-1.243) | 0.971         | 1.110 (0.869-1.417) | 1.057 (0.917-1.219) | 0.65          | 1.009 (0.860-1.185) | 1.148 (0.951-1.386) | 0.224         | 1.087 (0.909-1.300)           | 1.663 (0.960-2.882)        | 0.248         | Mean Blood Pressure (1/3SBP+2/3DBP) continuous (per 10mmHg increase) |
| 1 (referent)        |               | 1 (referent)        | 1 (referent)        |               | 1 (referent)        | 1 (referent)        |               | 1 (referent)                  | no cases in referent       |               | Systolic Blood Pressure (mmHg) ESH classification                    |
| 0.67 (0.32-1.37)    |               | 0.55 (0.17-1.76)    | 0.63 (0.32-1.23)    |               | 0.53 (0.26-1.12)    | 0.85 (0.33-2.18)    |               | 0.49 (0.24-1.02)              | -                          |               | < 120                                                                |
| 0.86 (0.45-1.65)    |               | 1.01 (0.37-2.78)    | 0.83 (0.45-1.54)    |               | 1.03 (0.55-1.92)    | 0.63 (0.24-1.67)    |               | 0.68 (0.35-1.34)              | -                          |               | 120-129                                                              |
| 0.83 (0.45-1.53)    | 0.545         | 0.77 (0.28-2.11)    | 0.94 (0.53-1.68)    | 0.763         | 0.88 (0.48-1.64)    | 0.97 (0.42-2.27)    | 0.232         | 0.81 (0.43-1.52)              | -                          | -             | 130-139                                                              |
| 1.03 (0.52-2.04)    |               | 1.59 (0.54-4.70)    | 0.91 (0.45-1.86)    |               | 0.97 (0.45-2.09)    | 1.27 (0.49-3.27)    |               | 0.95 (0.42-2.13)              | -                          |               | 140-159                                                              |
| 1.42 (0.60-3.34)    |               | 0.63 (0.07-5.46)    | 1.70 (0.73-3.96)    |               | 0.84 (0.24-2.96)    | 2.08 (0.70-6.22)    |               | 1.53 (0.53-4.40)              | -                          |               | 160-179                                                              |
| 0.344               |               | 0.49                | 0.254               |               | 0.698               | 0.149               |               | 0.426                         | -                          |               | >= 180                                                               |
|                     |               |                     |                     |               |                     |                     |               |                               |                            |               | p-trend                                                              |
| 1 (referent)        |               | 1 (referent)        | 1 (referent)        |               | 1 (referent)        | 1 (referent)        |               | 1 (referent)                  | no cases in referent       |               | Diastolic Blood Pressure (mmHg) ESH classification                   |
| 1.17 (0.70-1.94)    |               | 1.43 (0.62-3.28)    | 1.06 (0.63-1.77)    |               | 0.94 (0.54-1.64)    | 1.49 (0.72-3.09)    |               | 1.38 (0.79-2.42)              | -                          |               | < 80                                                                 |
| 1.27 (0.75-2.16)    |               | 1.32 (0.53-3.32)    | 1.34 (0.79-2.26)    |               | 1.14 (0.64-2.04)    | 1.85 (0.89-3.84)    |               | 1.68 (0.93-3.03)              | -                          |               | 80-84                                                                |
| 1.02 (0.61-1.71)    | 0.626         | 1.12 (0.46-2.77)    | 1.04 (0.62-1.75)    | 0.99          | 0.99 (0.57-1.72)    | 1.21 (0.57-2.58)    | 0.473         | 0.86 (0.43-1.71)              | -                          | -             | 85-89                                                                |
| 1.68 (0.89-3.17)    |               | 2.15 (0.73-6.35)    | 1.55 (0.80-3.00)    |               | 1.56 (0.75-3.23)    | 1.92 (0.78-4.76)    |               | 2.06 (0.90-4.72)              | -                          |               | 90-99                                                                |
| 0.86 (0.20-3.63)    |               | no cases            | 0.84 (0.20-3.56)    |               | no cases            | 1.74 (0.38-8.03)    |               | 1.01 (0.13-7.63)              | -                          |               | 100-109                                                              |
| 0.46                |               | 0.634               | 0.444               |               | 0.793               | 0.302               |               | 0.525                         | -                          |               | >= 110                                                               |
|                     |               |                     |                     |               |                     |                     |               |                               |                            |               | p-trend                                                              |
| 1 (referent)        |               | 1 (referent)        | 1 (referent)        |               | 1 (referent)        | 1 (referent)        |               | 1 (referent)                  | no cases in referent       |               | Systolic Blood Pressure (mmHg) ASH classification                    |
| 0.77 (0.43-1.41)    |               | 0.78 (0.31-1.98)    | 0.73 (0.42-1.28)    |               | 0.79 (0.44-1.40)    | 0.73 (0.31-1.70)    |               | 0.59 (0.32-1.06)              | -                          |               | < 120                                                                |
| 0.83 (0.45-1.52)    | 0.581         | 0.75 (0.27-2.07)    | 0.93 (0.52-1.66)    | 0.614         | 0.87 (0.47-1.60)    | 0.97 (0.42-2.27)    | 0.139         | 0.79 (0.42-1.50)              | -                          | -             | 120-139                                                              |
| 1.11 (0.58-2.12)    |               | 1.37 (0.47-3.97)    | 1.08 (0.56-2.07)    |               | 0.92 (0.44-1.90)    | 1.47 (0.60-3.60)    |               | 1.05 (0.50-2.22)              | -                          |               | 140-159                                                              |
| 0.452               |               | 0.49                | 0.424               |               | 0.987               | 0.128               |               | 0.571                         | -                          |               | >= 160                                                               |
|                     |               |                     |                     |               |                     |                     |               |                               |                            |               | p-trend                                                              |
| 1 (referent)        |               | 1 (referent)        | 1 (referent)        |               | 1 (referent)        | 1 (referent)        |               | 1 (referent)                  | no cases in referent       |               | Diastolic Blood Pressure (mmHg) ASH classification                   |
| 1.22 (0.78-1.89)    |               | 1.38 (0.66-2.91)    | 1.18 (0.76-1.83)    |               | 1.03 (0.64-1.64)    | 1.65 (0.87-3.13)    |               | 1.50 (0.91-2.46)              | -                          |               | < 80                                                                 |
| 1.02 (0.61-1.71)    | 0.735         | 1.12 (0.46-2.77)    | 1.04 (0.62-1.75)    | 0.862         | 0.99 (0.57-1.72)    | 1.21 (0.57-2.57)    | 0.509         | 0.86 (0.43-1.71)              | -                          | -             | 80-89                                                                |
| 1.50 (0.81-2.76)    |               | 1.68 (0.57-4.96)    | 1.39 (0.74-2.61)    |               | 1.22 (0.59-2.52)    | 1.88 (0.80-4.40)    |               | 1.84 (0.83-4.08)              | -                          |               | 90-99                                                                |
| 0.4                 |               | 0.488               | 0.472               |               | 0.747               | 0.329               |               | 0.509                         | -                          |               | >= 100                                                               |
|                     |               |                     |                     |               |                     |                     |               |                               |                            |               | p-trend                                                              |
| 1 (referent)        |               | 1 (referent)        | 1 (referent)        |               | 1 (referent)        | 1 (referent)        |               | 1 (referent)                  | no cases in referent       |               | Mean BP (mmHg) (1/3SBP+2/3DBP) Cohort-specific quartiles             |
| 1.33 (0.67-2.64)    |               | 1.91 (0.60-6.09)    | 1.21 (0.64-2.27)    |               | 1.31 (0.68-2.52)    | 1.17 (0.44-3.11)    |               | 1.09 (0.55-2.18)              | -                          |               | 50.0-88.3                                                            |
| 0.97 (0.49-1.91)    | 0.593         | 1.69 (0.53-5.40)    | 0.77 (0.40-1.48)    | 0.897         | 0.95 (0.48-1.86)    | 0.84 (0.32-2.25)    | 0.344         | 0.94 (0.47-1.89)              | -                          | -             | 88.5-96.6                                                            |
| 1.31 (0.69-2.49)    |               | 1.63 (0.51-5.15)    | 1.31 (0.72-2.40)    |               | 1.18 (0.62-2.26)    | 1.48 (0.60-3.68)    |               | 1.17 (0.58-2.36)              | -                          |               | 96.6-105.5                                                           |
| 0.561               |               | 0.672               | 0.434               |               | 0.904               | 0.28                |               | 0.71                          | -                          |               | 105.6-216.6                                                          |
|                     |               |                     |                     |               |                     |                     |               |                               |                            |               | p-trend                                                              |
| 1 (referent)        |               | 1 (referent)        | 1 (referent)        |               | 1 (referent)        | 1 (referent)        |               | -                             | -                          |               | Hypertension (SBP >= 140 mmHg, or DBP >= 90 mmHg, or self-reported)  |
| 1.04 (0.71-1.51)    | 0.361         | 1.20 (0.62-2.31)    | 1.06 (0.73-1.55)    | 0.575         | 1.10 (0.73-1.67)    | 1.11 (0.66-1.87)    | 0.814         | 1 (referent)                  | 0.58 (0.30-1.12)           |               | Normotensive<br>Hypertensive                                         |

| Esophageal SCC                                                                   |        | Excluding first 2 years of follow-up |                     |                     | Men                 | Women               | Sex                 | BMI <= 25 mg/m <sup>2</sup> | BMI > 25 mg/m <sup>2</sup> | BMI                 | Age <= 53 yrs |                     |
|----------------------------------------------------------------------------------|--------|--------------------------------------|---------------------|---------------------|---------------------|---------------------|---------------------|-----------------------------|----------------------------|---------------------|---------------|---------------------|
| Cases                                                                            | Cohort | HR (crude)                           | HR (adjusted)       | HR (adjusted)       | HR (adjusted)       | HR (adjusted)       | p-interaction       | HR (adjusted)               | HR (adjusted)              | p-interaction       | HR (adjusted) |                     |
| Cases                                                                            |        | 149                                  | 149                 | 124                 | 76                  | 73                  |                     | 80                          | 69                         |                     | 39            |                     |
| Cohort size                                                                      |        | 307318                               | 307318              | 301857              | 112591              | 194727              |                     | 146326                      | 160992                     |                     | 153303        |                     |
| <b>Mean Systolic Blood Pressure continuous (per 10mmHg increase)</b>             | 149    | 307318                               | 1.155 (1.067-1.250) | 1.161 (1.071-1.258) | 1.207 (1.107-1.315) | 1.201 (1.072-1.346) | 1.127 (1.005-1.263) | 0.892                       | 1.128 (1.011-1.259)        | 1.159 (1.031-1.303) | 0.805         | 1.235 (1.040-1.466) |
| <b>Mean Diastolic Blood Pressure continuous (per 10mmHg increase)</b>            | 149    | 307318                               | 1.282 (1.110-1.481) | 1.306 (1.126-1.515) | 1.417 (1.211-1.657) | 1.424 (1.161-1.747) | 1.211 (0.974-1.505) | 0.426                       | 1.290 (1.047-1.590)        | 1.272 (1.031-1.569) | 0.681         | 1.417 (1.050-1.912) |
| <b>Mean Blood Pressure (1/3SBP+2/3DBP) continuous (per 10mmHg increase)</b>      | 149    | 307318                               | 1.258 (1.114-1.420) | 1.276 (1.127-1.445) | 1.366 (1.197-1.560) | 1.368 (1.149-1.629) | 1.202 (1.005-1.438) | 0.602                       | 1.238 (1.043-1.471)        | 1.259 (1.053-1.506) | 0.938         | 1.387 (1.074-1.791) |
| <b>Systolic Blood Pressure (mmHg) ESH classification</b>                         |        |                                      |                     |                     |                     |                     |                     |                             |                            |                     |               |                     |
| < 120                                                                            | 21     | 86141                                | 1 (referent)        |                             | 1 (referent)               | 1 (referent)        |               | 1 (referent)        |
| 120-129                                                                          | 21     | 66446                                | 0.92 (0.50-1.69)    | 0.97 (0.53-1.79)    | 0.94 (0.47-1.87)    | 0.74 (0.29-1.89)    | 1.14 (0.51-2.56)    |                             | 0.59 (0.26-1.34)           | 1.69 (0.59-4.84)    |               | 0.47 (0.14-1.59)    |
| 130-139                                                                          | 25     | 57482                                | 1.08 (0.60-1.94)    | 1.14 (0.63-2.07)    | 1.12 (0.57-2.18)    | 0.97 (0.40-2.36)    | 1.29 (0.58-2.87)    |                             | 0.99 (0.48-2.05)           | 1.29 (0.44-3.77)    |               | 0.89 (0.31-2.53)    |
| 140-159                                                                          | 52     | 68235                                | 1.54 (0.91-2.60)    | 1.64 (0.96-2.80)    | 1.85 (1.02-3.34)    | 1.51 (0.68-3.36)    | 1.72 (0.83-3.56)    | 0.736                       | 1.56 (0.82-2.96)           | 1.65 (0.61-4.48)    | 0.863         | 1.33 (0.51-3.48)    |
| 160-179                                                                          | 21     | 22656                                | 1.74 (0.93-3.25)    | 1.87 (0.98-3.56)    | 2.08 (1.03-4.22)    | 2.37 (0.97-5.81)    | 1.24 (0.47-3.30)    |                             | 1.48 (0.62-3.51)           | 2.21 (0.75-6.51)    |               | 2.46 (0.78-7.76)    |
| >= 180                                                                           | 9      | 6358                                 | 2.64 (1.18-5.90)    | 2.81 (1.24-6.39)    | 3.73 (1.58-8.80)    | 2.98 (0.93-9.51)    | 2.61 (0.80-8.52)    |                             | 1.75 (0.49-6.27)           | 3.59 (1.05-12.27)   |               | 3.74 (0.72-19.57)   |
| p-trend                                                                          |        |                                      | 0.003               | 0.002               | 0.0003              | 0.004               | 0.121               |                             | 0.036                      | 0.062               |               | 0.029               |
| <b>Diastolic Blood Pressure (mmHg) ESH classification</b>                        |        |                                      |                     |                     |                     |                     |                     |                             |                            |                     |               |                     |
| < 80                                                                             | 44     | 132590                               | 1 (referent)        |                             | 1 (referent)               | 1 (referent)        |               | 1 (referent)        |
| 80-84                                                                            | 29     | 64872                                | 1.14 (0.71-1.83)    | 1.18 (0.73-1.89)    | 1.31 (0.77-2.22)    | 1.16 (0.56-2.38)    | 1.22 (0.64-2.31)    |                             | 1.51 (0.82-2.78)           | 0.74 (0.34-1.60)    |               | 1.15 (0.45-2.95)    |
| 85-89                                                                            | 19     | 41500                                | 1.05 (0.61-1.80)    | 1.12 (0.65-1.94)    | 1.19 (0.64-2.21)    | 0.95 (0.40-2.22)    | 1.35 (0.66-2.75)    |                             | 1.23 (0.59-2.58)           | 0.84 (0.38-1.87)    |               | 0.84 (0.26-2.71)    |
| 90-99                                                                            | 43     | 51196                                | 1.88 (1.22-2.89)    | 1.97 (1.26-3.06)    | 2.36 (1.45-3.84)    | 2.32 (1.23-4.39)    | 1.67 (0.88-3.17)    | 0.432                       | 2.21 (1.21-4.03)           | 1.53 (0.82-2.89)    | 0.447         | 2.22 (0.95-5.22)    |
| 100-109                                                                          | 11     | 13896                                | 1.71 (0.87-3.33)    | 1.76 (0.89-3.49)    | 2.19 (1.05-4.54)    | 2.02 (0.81-5.08)    | 1.61 (0.55-4.68)    |                             | 1.62 (0.56-4.74)           | 1.52 (0.63-3.67)    |               | 1.24 (0.26-5.85)    |
| >= 110                                                                           | 3      | 3264                                 | 2.03 (0.63-6.56)    | 2.14 (0.66-7.00)    | 2.84 (0.86-9.43)    | 3.74 (1.07-13.17)   | no cases            |                             | 2.22 (0.30-16.63)          | 1.77 (0.41-7.71)    |               | 2.56 (0.31-21.24)   |
| p-trend                                                                          |        |                                      | 0.004               | 0.003               | 0.0004              | 0.003               | 0.168               |                             | 0.026                      | 0.081               |               | 0.127               |
| <b>Systolic Blood Pressure (mmHg) ASH classification</b>                         |        |                                      |                     |                     |                     |                     |                     |                             |                            |                     |               |                     |
| < 120                                                                            | 21     | 86141                                | 1 (referent)        |                             | 1 (referent)               | 1 (referent)        |               | 1 (referent)        |
| 120-139                                                                          | 46     | 123928                               | 1.00 (0.59-1.68)    | 1.05 (0.62-1.78)    | 1.02 (0.57-1.85)    | 0.85 (0.38-1.89)    | 1.21 (0.60-2.44)    |                             | 0.78 (0.41-1.49)           | 1.48 (0.56-3.93)    |               | 0.67 (0.26-1.70)    |
| 140-159                                                                          | 52     | 68235                                | 1.54 (0.91-2.59)    | 1.63 (0.95-2.78)    | 1.83 (1.01-3.31)    | 1.50 (0.68-3.33)    | 1.71 (0.83-3.54)    | 0.65                        | 1.55 (0.81-2.94)           | 1.66 (0.61-4.49)    | 0.993         | 1.31 (0.50-3.42)    |
| >= 160                                                                           | 30     | 29014                                | 1.92 (1.07-3.45)    | 2.06 (1.13-3.76)    | 2.41 (1.25-4.65)    | 2.48 (1.05-5.85)    | 1.52 (0.64-3.64)    |                             | 1.53 (0.69-3.40)           | 2.54 (0.91-7.12)    |               | 2.64 (0.90-7.79)    |
| p-trend                                                                          |        |                                      | 0.004               | 0.003               | 0.0006              | 0.004               | 0.179               |                             | 0.063                      | 0.05                |               | 0.04                |
| <b>Diastolic Blood Pressure (mmHg) ASH classification</b>                        |        |                                      |                     |                     |                     |                     |                     |                             |                            |                     |               |                     |
| < 80                                                                             | 44     | 132590                               | 1 (referent)        |                             | 1 (referent)               | 1 (referent)        |               | 1 (referent)        |
| 80-89                                                                            | 48     | 106372                               | 1.10 (0.73-1.66)    | 1.15 (0.76-1.75)    | 1.26 (0.79-2.02)    | 1.07 (0.56-2.05)    | 1.27 (0.73-2.20)    |                             | 1.40 (0.81-2.42)           | 0.78 (0.41-1.49)    |               | 1.02 (0.44-2.38)    |
| 90-99                                                                            | 43     | 51196                                | 1.88 (1.22-2.89)    | 1.97 (1.26-3.06)    | 2.36 (1.45-3.84)    | 2.33 (1.23-4.41)    | 1.67 (0.88-3.17)    | 0.43                        | 2.21 (1.21-4.03)           | 1.53 (0.82-2.88)    | 0.39          | 2.22 (0.95-5.21)    |
| >= 100                                                                           | 14     | 17160                                | 1.77 (0.96-3.25)    | 1.83 (0.98-3.43)    | 2.31 (1.19-4.50)    | 2.36 (1.03-5.37)    | 1.35 (0.46-3.92)    |                             | 1.72 (0.64-4.57)           | 1.56 (0.69-3.53)    |               | 1.50 (0.39-5.69)    |
| p-trend                                                                          |        |                                      | 0.003               | 0.003               | 0.0003              | 0.003               | 0.165               |                             | 0.019                      | 0.09                |               | 0.119               |
| <b>Mean BP (mmHg) (1/3SBP+2/3DBP) Cohort-specific quartiles</b>                  |        |                                      |                     |                     |                     |                     |                     |                             |                            |                     |               |                     |
| 50.0-88.3                                                                        | 19     | 76991                                | 1 (referent)        |                             | 1 (referent)               | 1 (referent)        |               | 1 (referent)        |
| 88.5-96.6                                                                        | 27     | 77727                                | 1.04 (0.58-1.88)    | 1.10 (0.61-1.99)    | 1.27 (0.65-2.50)    | 0.79 (0.30-2.10)    | 1.31 (0.62-2.76)    |                             | 0.89 (0.41-1.91)           | 1.20 (0.45-3.19)    |               | 0.92 (0.31-2.73)    |
| 96.8-105.5                                                                       | 37     | 76327                                | 1.21 (0.69-2.11)    | 1.30 (0.74-2.30)    | 1.50 (0.78-2.88)    | 1.17 (0.48-2.89)    | 1.41 (0.68-2.95)    | 0.292                       | 1.54 (0.77-3.06)           | 0.81 (0.31-2.16)    | 0.586         | 0.81 (0.26-2.51)    |
| 105.6-216.6                                                                      | 66     | 76273                                | 1.84 (1.09-3.10)    | 2.00 (1.16-3.44)    | 2.53 (1.36-4.71)    | 2.37 (1.02-5.53)    | 1.57 (0.76-3.26)    |                             | 1.82 (0.92-3.62)           | 1.70 (0.70-4.14)    |               | 2.09 (0.76-5.72)    |
| p-trend                                                                          |        |                                      | 0.005               | 0.003               | 0.0006              | 0.002               | 0.234               |                             | 0.025                      | 0.131               |               | 0.083               |
| <b>Hypertension (SBP &gt;= 140 mmHg, or DBP &gt;= 90 mmHg, or self-reported)</b> |        |                                      |                     |                     |                     |                     |                     |                             |                            |                     |               |                     |
| Normotensive                                                                     | 59     | 174179                               | 1 (referent)        |                             | 1 (referent)               | 1 (referent)        |               | 1 (referent)        |
| Hypertensive                                                                     | 90     | 133139                               | 1.40 (1.00-1.96)    | 1.47 (1.04-2.09)    | 1.75 (1.19-2.57)    | 1.63 (0.99-2.69)    | 1.35 (0.83-2.21)    | 0.982                       | 1.55 (0.98-2.44)           | 1.27 (0.76-2.13)    | 0.467         | 1.50 (0.77-2.93)    |

| Age > 53 yrs        | Age           | Never smokers       | Ever smokers        | Smoking       | Alcohol <= 12g      | Alcohol > 12g       | Alcohol       | No antihypertensive treatment | Antihypertensive treatment | Treatment     | Esophageal SCC                                                       |
|---------------------|---------------|---------------------|---------------------|---------------|---------------------|---------------------|---------------|-------------------------------|----------------------------|---------------|----------------------------------------------------------------------|
| HR (adjusted)       | p-interaction | HR (adjusted)       | HR (adjusted)       | p-interaction | HR (adjusted)       | HR (adjusted)       | p-interaction | HR (adjusted)                 | HR (adjusted)              | p-interaction |                                                                      |
| 110<br>154015       |               | 31<br>141931        | 117<br>160623       |               | 63<br>205214        | 86<br>102104        |               | 102<br>227336                 | 16<br>37017                |               | Cases<br>Cohort size                                                 |
| 1.140 (1.039-1.249) | 0.127         | 1.117 (0.927-1.346) | 1.174 (1.073-1.284) | 0.505         | 1.005 (0.877-1.152) | 1.270 (1.150-1.402) | 0.012         | 1.191 (1.076-1.318)           | 1.227 (0.970-1.552)        | 0.424         | Mean Systolic Blood Pressure continuous (per 10mmHg increase)        |
| 1.265 (1.065-1.503) | 0.214         | 1.221 (0.871-1.711) | 1.325 (1.121-1.566) | 0.243         | 0.984 (0.770-1.258) | 1.587 (1.315-1.916) | 0.001         | 1.403 (1.166-1.688)           | 1.452 (0.926-2.277)        | 0.983         | Mean Diastolic Blood Pressure continuous (per 10mmHg increase)       |
| 1.240 (1.074-1.431) | 0.152         | 1.197 (0.901-1.590) | 1.296 (1.127-1.490) | 0.322         | 0.996 (0.808-1.227) | 1.498 (1.283-1.749) | 0.002         | 1.354 (1.157-1.584)           | 1.413 (0.976-2.046)        | 0.627         | Mean Blood Pressure (1/3SBP+2/3DBP) continuous (per 10mmHg increase) |
| 1 (referent)        |               | 1 (referent)        | 1 (referent)        |               | 1 (referent)        | 1 (referent)        |               | 1 (referent)                  | single case in referent    |               | Systolic Blood Pressure (mmHg) ESH classification                    |
| 1.23 (0.59-2.54)    |               | 0.41 (0.11-1.62)    | 1.30 (0.63-2.67)    |               | 0.96 (0.43-2.14)    | 0.99 (0.38-2.59)    |               | 1.13 (0.57-2.24)              | -                          |               | < 120                                                                |
| 1.23 (0.59-2.54)    |               | 0.83 (0.27-2.56)    | 1.36 (0.66-2.80)    |               | 0.87 (0.38-2.00)    | 1.46 (0.60-3.53)    |               | 1.14 (0.57-2.30)              | -                          |               | 120-129                                                              |
| 1.74 (0.90-3.34)    | 0.134         | 0.95 (0.34-2.71)    | 2.06 (1.07-3.97)    | 0.362         | 1.05 (0.49-2.26)    | 2.40 (1.08-5.35)    | 0.013         | 1.81 (0.96-3.41)              | -                          | -             | 130-139                                                              |
| 1.72 (0.79-3.75)    |               | 0.49 (0.10-2.56)    | 2.62 (1.24-5.55)    |               | 0.88 (0.31-2.48)    | 3.26 (1.33-7.99)    |               | 2.50 (1.14-5.45)              | -                          |               | 140-159                                                              |
| 2.71 (1.04-7.06)    |               | 3.25 (0.76-13.90)   | 2.80 (1.02-7.70)    |               | 1.12 (0.24-5.29)    | 5.44 (1.88-15.77)   |               | 3.01 (0.96-9.43)              | -                          |               | >= 180                                                               |
| 0.023               |               | 0.443               | 0.002               |               | 0.965               | 0.00005             |               | 0.004                         | -                          |               | p-trend                                                              |
| 1 (referent)        |               | 1 (referent)        | 1 (referent)        |               | 1 (referent)        | 1 (referent)        |               | 1 (referent)                  | single case in referent    |               | Diastolic Blood Pressure (mmHg) ESH classification                   |
| 1.17 (0.67-2.04)    |               | 0.78 (0.25-2.47)    | 1.33 (0.78-2.27)    |               | 0.93 (0.48-1.83)    | 1.60 (0.79-3.24)    |               | 1.00 (0.56-1.81)              | -                          |               | < 80                                                                 |
| 1.19 (0.64-2.21)    |               | 2.01 (0.76-5.31)    | 0.91 (0.46-1.78)    |               | 1.11 (0.53-2.33)    | 1.27 (0.56-2.90)    |               | 1.24 (0.65-2.35)              | -                          |               | 80-84                                                                |
| 1.82 (1.09-3.06)    | 0.48          | 1.76 (0.65-4.75)    | 2.06 (1.25-3.41)    | 0.454         | 0.84 (0.40-1.77)    | 3.62 (1.95-6.74)    | 0.0005        | 2.33 (1.37-3.94)              | -                          | -             | 85-89                                                                |
| 1.94 (0.91-4.17)    |               | 2.02 (0.43-9.48)    | 1.69 (0.79-3.64)    |               | 0.65 (0.15-2.79)    | 3.28 (1.41-7.65)    |               | 2.11 (0.86-5.18)              | -                          |               | 90-99                                                                |
| 1.88 (0.45-7.95)    |               | no cases            | 2.61 (0.78-8.67)    |               | no cases            | 5.01 (1.42-17.61)   |               | 3.32 (0.78-14.14)             | -                          |               | 100-109                                                              |
| 0.014               |               | 0.167               | 0.008               |               | 0.479               | 0.00001             |               | 0.0008                        | -                          |               | >= 110                                                               |
| 1 (referent)        |               | 1 (referent)        | 1 (referent)        |               | 1 (referent)        | 1 (referent)        |               | 1 (referent)                  | single case in referent    |               | Systolic Blood Pressure (mmHg) ASH classification                    |
| 1.23 (0.64-2.34)    |               | 0.61 (0.22-1.70)    | 1.33 (0.70-2.53)    |               | 0.92 (0.45-1.85)    | 1.23 (0.54-2.77)    |               | 1.13 (0.62-2.08)              | -                          |               | < 120                                                                |
| 1.73 (0.90-3.33)    | 0.155         | 0.94 (0.33-2.66)    | 2.06 (1.07-3.96)    | 0.189         | 1.06 (0.49-2.26)    | 2.37 (1.06-5.29)    | 0.021         | 1.81 (0.96-3.40)              | -                          | -             | 120-139                                                              |
| 1.94 (0.94-4.01)    |               | 0.98 (0.28-3.43)    | 2.66 (1.30-5.45)    |               | 0.94 (0.36-2.43)    | 3.68 (1.57-8.64)    |               | 2.60 (1.24-5.43)              | -                          |               | 140-159                                                              |
| 0.028               |               | 0.774               | 0.001               |               | 0.954               | 0.0001              |               | 0.003                         | -                          |               | >= 160                                                               |
| 1 (referent)        |               | 1 (referent)        | 1 (referent)        |               | 1 (referent)        | 1 (referent)        |               | 1 (referent)                  | single case in referent    |               | Diastolic Blood Pressure (mmHg) ASH classification                   |
| 1.18 (0.73-1.91)    |               | 1.27 (0.54-2.99)    | 1.16 (0.71-1.88)    |               | 1.01 (0.57-1.77)    | 1.46 (0.77-2.77)    |               | 1.09 (0.66-1.81)              | -                          |               | < 80                                                                 |
| 1.82 (1.09-3.06)    | 0.498         | 1.74 (0.65-4.70)    | 2.07 (1.25-3.42)    | 0.301         | 0.84 (0.40-1.77)    | 3.63 (1.95-6.75)    | 0.0004        | 2.32 (1.37-3.94)              | -                          | -             | 80-89                                                                |
| 1.93 (0.95-3.93)    |               | 1.65 (0.35-7.73)    | 1.87 (0.93-3.73)    |               | 0.53 (0.12-2.29)    | 3.60 (1.65-7.85)    |               | 2.32 (1.04-5.17)              | -                          |               | 90-99                                                                |
| 0.012               |               | 0.275               | 0.005               |               | 0.426               | 0.000007            |               | 0.001                         | -                          |               | >= 100                                                               |
| 1 (referent)        |               | 1 (referent)        | 1 (referent)        |               | 1 (referent)        | 1 (referent)        |               | 1 (referent)                  | single case in referent    |               | Mean BP (mmHg) (1/3SBP+2/3DBP) Cohort-specific quartiles             |
| 1.14 (0.56-2.33)    |               | 0.32 (0.08-1.21)    | 1.55 (0.75-3.21)    |               | 1.30 (0.62-2.72)    | 0.86 (0.32-2.33)    |               | 1.11 (0.57-2.17)              | -                          |               | 50.0-88.3                                                            |
| 1.43 (0.74-2.79)    | 0.312         | 0.77 (0.28-2.14)    | 1.68 (0.82-3.42)    | 0.186         | 1.05 (0.48-2.28)    | 1.67 (0.70-4.00)    | 0.001         | 1.22 (0.62-2.37)              | -                          | -             | 88.5-96.6                                                            |
| 1.91 (1.00-3.64)    |               | 1.06 (0.40-2.83)    | 2.59 (1.30-5.13)    |               | 1.00 (0.45-2.20)    | 3.32 (1.45-7.59)    |               | 2.36 (1.25-4.45)              | -                          |               | 96.8-105.5                                                           |
| 0.02                |               | 0.511               | 0.003               |               | 0.791               | 0.00004             |               | 0.003                         | -                          |               | 105.6-216.6                                                          |
| 1 (referent)        |               | 1 (referent)        | 1 (referent)        |               | 1 (referent)        | 1 (referent)        |               | -                             | -                          |               | Hypertension (SBP >= 140 mmHg, or DBP >= 90 mmHg, or self-reported)  |
| 1.43 (0.95-2.15)    | 0.499         | 1.62 (0.75-3.50)    | 1.43 (0.97-2.12)    | 0.989         | 0.89 (0.52-1.50)    | 2.19 (1.36-3.55)    | 0.021         | 1 (referent)                  | 0.86 (0.48-1.53)           |               | Normotensive<br>Hypertensive                                         |

| Stomach                                                                          |        | Excluding first 2 years of follow-up |                     |                     | Men                 | Women               | Sex                 | BMI <= 25 mg/m <sup>2</sup> | BMI > 25 mg/m <sup>2</sup> | BMI                 | Age <= 53 yrs |                     |
|----------------------------------------------------------------------------------|--------|--------------------------------------|---------------------|---------------------|---------------------|---------------------|---------------------|-----------------------------|----------------------------|---------------------|---------------|---------------------|
| Cases                                                                            | Cohort | HR (crude)                           | HR (adjusted)       | HR (adjusted)       | HR (adjusted)       | HR (adjusted)       | p-interaction       | HR (adjusted)               | HR (adjusted)              | p-interaction       | HR (adjusted) |                     |
| Cases                                                                            |        | 738                                  | 738                 | 674                 | 424                 | 314                 |                     | 296                         | 442                        |                     | 164           |                     |
| Cohort size                                                                      |        | 307318                               | 307318              | 301857              | 112591              | 194727              |                     | 146326                      | 160992                     |                     | 153303        |                     |
| <b>Mean Systolic Blood Pressure continuous (per 10mmHg increase)</b>             | 738    | 307318                               | 1.028 (0.990-1.069) | 1.005 (0.965-1.046) | 1.004 (0.962-1.047) | 0.993 (0.940-1.049) | 1.020 (0.960-1.083) | 0.815                       | 1.030 (0.967-1.097)        | 0.995 (0.944-1.048) | 0.384         | 1.027 (0.932-1.132) |
| <b>Mean Diastolic Blood Pressure continuous (per 10mmHg increase)</b>            | 738    | 307318                               | 1.107 (1.033-1.186) | 1.055 (0.982-1.134) | 1.069 (0.992-1.152) | 1.013 (0.921-1.114) | 1.118 (1.003-1.247) | 0.241                       | 1.050 (0.936-1.177)        | 1.070 (0.977-1.171) | 0.736         | 1.058 (0.902-1.239) |
| <b>Mean Blood Pressure (1/3SBP+2/3DBP) continuous (per 10mmHg increase)</b>      | 738    | 307318                               | 1.074 (1.012-1.138) | 1.030 (0.969-1.096) | 1.036 (0.972-1.105) | 1.001 (0.922-1.088) | 1.072 (0.977-1.176) | 0.45                        | 1.048 (0.951-1.154)        | 1.030 (0.952-1.114) | 0.803         | 1.049 (0.912-1.207) |
| <b>Systolic Blood Pressure (mmHg) ESH classification</b>                         |        |                                      |                     |                     |                     |                     |                     |                             |                            |                     |               |                     |
| < 120                                                                            | 122    | 86141                                | 1 (referent)        |                             | 1 (referent)               | 1 (referent)        |               | 1 (referent)        |
| 120-129                                                                          | 143    | 66446                                | 1.10 (0.86-1.41)    | 1.01 (0.79-1.29)    | 0.99 (0.76-1.28)    | 1.06 (0.75-1.49)    | 0.94 (0.65-1.35)    |                             | 0.93 (0.66-1.32)           | 1.08 (0.76-1.53)    |               | 0.97 (0.63-1.49)    |
| 130-139                                                                          | 148    | 57482                                | 1.10 (0.86-1.40)    | 0.96 (0.75-1.23)    | 0.94 (0.72-1.22)    | 0.96 (0.68-1.36)    | 0.96 (0.67-1.39)    |                             | 0.87 (0.60-1.26)           | 1.05 (0.74-1.48)    |               | 0.98 (0.62-1.57)    |
| 140-159                                                                          | 205    | 68235                                | 1.04 (0.82-1.31)    | 0.89 (0.70-1.13)    | 0.91 (0.70-1.17)    | 0.81 (0.58-1.14)    | 1.04 (0.73-1.47)    | 0.61                        | 0.97 (0.68-1.38)           | 0.88 (0.63-1.24)    | 0.207         | 0.81 (0.49-1.35)    |
| 160-179                                                                          | 89     | 22656                                | 1.20 (0.90-1.60)    | 1.02 (0.76-1.37)    | 1.03 (0.76-1.40)    | 0.92 (0.62-1.38)    | 1.15 (0.74-1.78)    |                             | 1.18 (0.74-1.86)           | 0.99 (0.67-1.47)    |               | 1.09 (0.52-2.31)    |
| >= 180                                                                           | 31     | 6358                                 | 1.49 (0.99-2.23)    | 1.25 (0.83-1.90)    | 1.17 (0.75-1.82)    | 1.31 (0.77-2.24)    | 1.16 (0.60-2.26)    |                             | 1.91 (1.03-3.54)           | 1.04 (0.60-1.81)    |               | 3.23 (1.32-7.86)    |
| p-trend                                                                          |        |                                      | 0.209               | 0.996               | 0.93                | 0.507               | 0.44                |                             | 0.257                      | 0.51                |               | 0.644               |
| <b>Diastolic Blood Pressure (mmHg) ESH classification</b>                        |        |                                      |                     |                     |                     |                     |                     |                             |                            |                     |               |                     |
| < 80                                                                             | 243    | 132590                               | 1 (referent)        |                             | 1 (referent)               | 1 (referent)        |               | 1 (referent)        |
| 80-84                                                                            | 147    | 64872                                | 0.95 (0.77-1.17)    | 0.89 (0.72-1.10)    | 0.88 (0.70-1.10)    | 0.83 (0.62-1.09)    | 0.98 (0.72-1.34)    |                             | 0.85 (0.62-1.17)           | 0.94 (0.71-1.25)    |               | 0.99 (0.65-1.50)    |
| 85-89                                                                            | 112    | 41500                                | 1.08 (0.86-1.35)    | 1.00 (0.79-1.25)    | 1.03 (0.81-1.30)    | 0.96 (0.72-1.30)    | 1.02 (0.71-1.46)    |                             | 1.06 (0.74-1.50)           | 0.99 (0.73-1.34)    |               | 0.73 (0.43-1.27)    |
| 90-99                                                                            | 172    | 51196                                | 1.22 (1.00-1.49)    | 1.09 (0.89-1.34)    | 1.16 (0.93-1.43)    | 0.96 (0.73-1.26)    | 1.28 (0.94-1.76)    | 0.257                       | 1.09 (0.78-1.52)           | 1.13 (0.86-1.47)    | 0.997         | 1.00 (0.63-1.60)    |
| 100-109                                                                          | 46     | 13896                                | 1.17 (0.85-1.61)    | 1.01 (0.73-1.39)    | 1.02 (0.73-1.44)    | 0.73 (0.47-1.14)    | 1.61 (1.00-2.59)    |                             | 0.69 (0.34-1.42)           | 1.17 (0.80-1.70)    |               | 1.12 (0.54-2.33)    |
| >= 110                                                                           | 18     | 3264                                 | 2.02 (1.25-3.26)    | 1.67 (1.03-2.72)    | 1.74 (1.06-2.88)    | 1.85 (1.07-3.19)    | 1.05 (0.33-3.34)    |                             | 3.46 (1.68-7.15)           | 1.20 (0.62-2.30)    |               | 3.27 (1.37-7.79)    |
| p-trend                                                                          |        |                                      | 0.004               | 0.138               | 0.052               | 0.77                | 0.048               |                             | 0.297                      | 0.195               |               | 0.423               |
| <b>Systolic Blood Pressure (mmHg) ASH classification</b>                         |        |                                      |                     |                     |                     |                     |                     |                             |                            |                     |               |                     |
| < 120                                                                            | 122    | 86141                                | 1 (referent)        |                             | 1 (referent)               | 1 (referent)        |               | 1 (referent)        |
| 120-139                                                                          | 291    | 123928                               | 1.10 (0.89-1.37)    | 0.98 (0.79-1.22)    | 0.96 (0.76-1.21)    | 1.01 (0.74-1.37)    | 0.95 (0.69-1.30)    |                             | 0.90 (0.66-1.23)           | 1.06 (0.77-1.46)    |               | 0.97 (0.66-1.42)    |
| 140-159                                                                          | 205    | 68235                                | 1.04 (0.82-1.31)    | 0.89 (0.70-1.13)    | 0.91 (0.71-1.17)    | 0.81 (0.58-1.14)    | 1.04 (0.73-1.47)    | 0.602                       | 0.97 (0.68-1.38)           | 0.88 (0.63-1.24)    | 0.195         | 0.81 (0.48-1.34)    |
| >= 160                                                                           | 120    | 29014                                | 1.26 (0.96-1.65)    | 1.07 (0.81-1.41)    | 1.07 (0.80-1.42)    | 1.01 (0.69-1.47)    | 1.15 (0.77-1.73)    |                             | 1.33 (0.88-2.01)           | 1.01 (0.69-1.46)    |               | 1.48 (0.79-2.76)    |
| p-trend                                                                          |        |                                      | 0.215               | 0.96                | 0.836               | 0.531               | 0.429               |                             | 0.245                      | 0.53                |               | 0.74                |
| <b>Diastolic Blood Pressure (mmHg) ASH classification</b>                        |        |                                      |                     |                     |                     |                     |                     |                             |                            |                     |               |                     |
| < 80                                                                             | 243    | 132590                               | 1 (referent)        |                             | 1 (referent)               | 1 (referent)        |               | 1 (referent)        |
| 80-89                                                                            | 259    | 106372                               | 1.00 (0.84-1.19)    | 0.93 (0.78-1.12)    | 0.94 (0.78-1.13)    | 0.88 (0.69-1.13)    | 1.00 (0.76-1.30)    |                             | 0.92 (0.71-1.21)           | 0.97 (0.76-1.23)    |               | 0.89 (0.61-1.30)    |
| 90-99                                                                            | 172    | 51196                                | 1.22 (1.00-1.49)    | 1.09 (0.89-1.34)    | 1.16 (0.93-1.43)    | 0.96 (0.73-1.26)    | 1.28 (0.94-1.76)    | 0.141                       | 1.09 (0.78-1.52)           | 1.13 (0.86-1.47)    | 0.691         | 1.01 (0.63-1.60)    |
| >= 100                                                                           | 64     | 17160                                | 1.33 (1.01-1.76)    | 1.13 (0.85-1.51)    | 1.16 (0.86-1.56)    | 0.94 (0.65-1.36)    | 1.51 (0.96-2.37)    |                             | 1.15 (0.68-1.95)           | 1.17 (0.83-1.65)    |               | 1.53 (0.84-2.79)    |
| p-trend                                                                          |        |                                      | 0.012               | 0.258               | 0.133               | 0.829               | 0.041               |                             | 0.59                       | 0.213               |               | 0.378               |
| <b>Mean BP (mmHg) (1/3SBP+2/3DBP) Cohort-specific quartiles</b>                  |        |                                      |                     |                     |                     |                     |                     |                             |                            |                     |               |                     |
| 50.0-88.3                                                                        | 115    | 76991                                | 1 (referent)        |                             | 1 (referent)               | 1 (referent)        |               | 1 (referent)        |
| 88.5-96.6                                                                        | 160    | 77727                                | 0.99 (0.78-1.27)    | 0.92 (0.72-1.17)    | 0.84 (0.65-1.09)    | 0.98 (0.70-1.38)    | 0.82 (0.58-1.18)    |                             | 0.80 (0.57-1.12)           | 1.04 (0.73-1.49)    |               | 1.10 (0.71-1.70)    |
| 96.8-105.5                                                                       | 190    | 76327                                | 1.00 (0.79-1.26)    | 0.88 (0.69-1.13)    | 0.87 (0.68-1.12)    | 0.80 (0.57-1.13)    | 1.01 (0.72-1.43)    | 0.174                       | 0.96 (0.69-1.35)           | 0.87 (0.61-1.24)    | 0.482         | 0.77 (0.47-1.27)    |
| 105.6-216.6                                                                      | 273    | 76273                                | 1.21 (0.96-1.52)    | 1.03 (0.81-1.30)    | 1.02 (0.80-1.30)    | 0.91 (0.65-1.27)    | 1.22 (0.87-1.71)    |                             | 1.12 (0.80-1.57)           | 1.03 (0.73-1.44)    |               | 1.17 (0.72-1.91)    |
| p-trend                                                                          |        |                                      | 0.056               | 0.592               | 0.44                | 0.464               | 0.098               |                             | 0.291                      | 0.95                |               | 0.864               |
| <b>Hypertension (SBP &gt;= 140 mmHg, or DBP &gt;= 90 mmHg, or self-reported)</b> |        |                                      |                     |                     |                     |                     |                     |                             |                            |                     |               |                     |
| Normotensive                                                                     | 337    | 174179                               | 1 (referent)        |                             | 1 (referent)               | 1 (referent)        |               | 1 (referent)        |
| Hypertensive                                                                     | 401    | 133139                               | 1.00 (0.86-1.17)    | 0.94 (0.80-1.10)    | 0.98 (0.83-1.15)    | 0.84 (0.68-1.02)    | 1.11 (0.87-1.41)    | 0.165                       | 1.02 (0.80-1.29)           | 0.92 (0.75-1.12)    | 0.578         | 0.97 (0.69-1.36)    |





| <b>Gastic AC</b>                                                                 |        | Excluding first 2 years of follow-up |                      |                      |                      | <b>Men</b>           | <b>Women</b>         | <b>Sex</b>           | <b>BMI &lt;= 25 mg/m<sup>2</sup></b> | <b>BMI &gt; 25 mg/m<sup>2</sup></b> | <b>BMI</b>           | <b>Age &lt;= 53 yrs</b> |
|----------------------------------------------------------------------------------|--------|--------------------------------------|----------------------|----------------------|----------------------|----------------------|----------------------|----------------------|--------------------------------------|-------------------------------------|----------------------|-------------------------|
| Cases                                                                            | Cohort | <b>HR (crude)</b>                    | <b>HR (adjusted)</b> | <b>p-interaction</b> | <b>HR (adjusted)</b>                 | <b>HR (adjusted)</b>                | <b>p-interaction</b> | <b>HR (adjusted)</b>    |
| <b>Cases</b>                                                                     |        | 403                                  | 403                  | 375                  | 254                  | 149                  |                      | 171                  | 232                                  |                                     | 88                   |                         |
| <b>Cohort size</b>                                                               |        | 307318                               | 307318               | 301857               | 112591               | 194727               |                      | 146326               | 160992                               |                                     | 153303               |                         |
| <b>Mean Systolic Blood Pressure continuous (per 10mmHg increase)</b>             | 403    | 307318                               | 1.038 (0.986-1.094)  | 1.008 (0.955-1.065)  | 1.017 (0.962-1.076)  | 1.021 (0.952-1.095)  | 0.989 (0.906-1.080)  | 0.821                | 0.989 (0.909-1.076)                  | 1.034 (0.963-1.109)                 | 0.436                | 1.025 (0.899-1.167)     |
| <b>Mean Diastolic Blood Pressure continuous (per 10mmHg increase)</b>            | 403    | 307318                               | 1.128 (1.028-1.236)  | 1.054 (0.957-1.161)  | 1.095 (0.991-1.209)  | 1.002 (0.885-1.133)  | 1.154 (0.987-1.350)  | 0.101                | 1.002 (0.861-1.166)                  | 1.118 (0.988-1.264)                 | 0.264                | 1.052 (0.848-1.305)     |
| <b>Mean Blood Pressure (1/3SBP+2/3DBP) continuous (per 10mmHg increase)</b>      | 403    | 307318                               | 1.091 (1.008-1.180)  | 1.032 (0.950-1.122)  | 1.059 (0.973-1.154)  | 1.017 (0.914-1.131)  | 1.062 (0.929-1.214)  | 0.432                | 0.992 (0.872-1.129)                  | 1.084 (0.974-1.205)                 | 0.298                | 1.045 (0.864-1.263)     |
| <b>Systolic Blood Pressure (mmHg) ESH classification</b>                         |        |                                      |                      |                      |                      |                      |                      |                      |                                      |                                     |                      |                         |
| < 120                                                                            | 64     | 86141                                | 1 (referent)         |                      | 1 (referent)                         | 1 (referent)                        |                      | 1 (referent)            |
| 120-129                                                                          | 74     | 66446                                | 1.02 (0.73-1.43)     | 0.91 (0.65-1.27)     | 0.93 (0.65-1.32)     | 0.74 (0.47-1.16)     | 1.17 (0.70-1.97)     |                      | 0.93 (0.59-1.45)                     | 0.93 (0.55-1.56)                    |                      | 0.85 (0.47-1.54)        |
| 130-139                                                                          | 84     | 57482                                | 1.09 (0.78-1.53)     | 0.92 (0.66-1.29)     | 0.94 (0.66-1.33)     | 0.90 (0.59-1.38)     | 0.86 (0.49-1.50)     |                      | 0.80 (0.49-1.30)                     | 1.09 (0.67-1.78)                    |                      | 0.79 (0.41-1.51)        |
| 140-159                                                                          | 108    | 68235                                | 0.93 (0.67-1.28)     | 0.76 (0.54-1.05)     | 0.79 (0.56-1.12)     | 0.63 (0.41-0.97)     | 0.99 (0.59-1.66)     | 0.911                | 0.79 (0.50-1.26)                     | 0.81 (0.50-1.32)                    | 0.663                | 0.69 (0.35-1.35)        |
| 160-179                                                                          | 53     | 22656                                | 1.19 (0.81-1.75)     | 0.96 (0.65-1.43)     | 1.03 (0.69-1.54)     | 0.90 (0.55-1.47)     | 1.01 (0.53-1.92)     |                      | 0.92 (0.50-1.69)                     | 1.09 (0.64-1.87)                    |                      | 0.66 (0.22-1.97)        |
| >= 180                                                                           | 20     | 6358                                 | 1.60 (0.95-2.70)     | 1.28 (0.76-2.17)     | 1.34 (0.78-2.32)     | 1.40 (0.74-2.63)     | 0.95 (0.35-2.55)     |                      | 1.44 (0.62-3.34)                     | 1.32 (0.65-2.65)                    |                      | 3.50 (1.26-9.74)        |
| <b>p-trend</b>                                                                   |        |                                      | 0.346                | 0.81                 | 0.896                | 0.943                | 0.773                |                      | 0.762                                | 0.777                               |                      | 0.949                   |
| <b>Diastolic Blood Pressure (mmHg) ESH classification</b>                        |        |                                      |                      |                      |                      |                      |                      |                      |                                      |                                     |                      |                         |
| < 80                                                                             | 136    | 132590                               | 1 (referent)         |                      | 1 (referent)                         | 1 (referent)                        |                      | 1 (referent)            |
| 80-84                                                                            | 72     | 64872                                | 0.83 (0.62-1.10)     | 0.76 (0.57-1.01)     | 0.80 (0.59-1.09)     | 0.61 (0.41-0.89)     | 1.04 (0.67-1.63)     |                      | 0.59 (0.37-0.93)                     | 0.96 (0.65-1.43)                    |                      | 0.95 (0.54-1.69)        |
| 85-89                                                                            | 62     | 41500                                | 1.03 (0.76-1.40)     | 0.91 (0.67-1.24)     | 0.99 (0.72-1.36)     | 0.86 (0.59-1.26)     | 0.98 (0.58-1.64)     |                      | 0.95 (0.60-1.49)                     | 0.95 (0.62-1.45)                    |                      | 0.75 (0.36-1.55)        |
| 90-99                                                                            | 94     | 51196                                | 1.15 (0.88-1.51)     | 0.98 (0.74-1.29)     | 1.08 (0.81-1.43)     | 0.91 (0.64-1.27)     | 1.06 (0.66-1.71)     | 0.234                | 0.98 (0.64-1.50)                     | 1.10 (0.76-1.59)                    | 0.413                | 0.93 (0.49-1.76)        |
| 100-109                                                                          | 27     | 13896                                | 1.18 (0.78-1.80)     | 0.95 (0.62-1.45)     | 1.09 (0.71-1.68)     | 0.62 (0.35-1.10)     | 1.96 (1.05-3.66)     |                      | 0.36 (0.11-1.15)                     | 1.35 (0.83-2.21)                    |                      | 1.02 (0.38-2.71)        |
| >= 110                                                                           | 12     | 3264                                 | 2.38 (1.31-4.31)     | 1.84 (1.01-3.35)     | 2.10 (1.15-3.85)     | 1.88 (0.96-3.68)     | 1.42 (0.34-5.89)     |                      | 2.95 (1.17-7.41)                     | 1.60 (0.72-3.52)                    |                      | 2.64 (0.78-8.96)        |
| <b>p-trend</b>                                                                   |        |                                      | 0.023                | 0.398                | 0.097                | 0.864                | 0.211                |                      | 0.969                                | 0.161                               |                      | 0.786                   |
| <b>Systolic Blood Pressure (mmHg) ASH classification</b>                         |        |                                      |                      |                      |                      |                      |                      |                      |                                      |                                     |                      |                         |
| < 120                                                                            | 64     | 86141                                | 1 (referent)         |                      | 1 (referent)                         | 1 (referent)                        |                      | 1 (referent)            |
| 120-139                                                                          | 158    | 123928                               | 1.06 (0.79-1.42)     | 0.91 (0.68-1.23)     | 0.93 (0.68-1.27)     | 0.82 (0.56-1.21)     | 1.02 (0.64-1.63)     |                      | 0.87 (0.58-1.30)                     | 1.02 (0.64-1.61)                    |                      | 0.82 (0.49-1.40)        |
| 140-159                                                                          | 108    | 68235                                | 0.92 (0.67-1.28)     | 0.76 (0.54-1.05)     | 0.79 (0.56-1.12)     | 0.63 (0.41-0.96)     | 1.00 (0.60-1.68)     | 0.601                | 0.79 (0.50-1.27)                     | 0.81 (0.50-1.31)                    | 0.818                | 0.68 (0.35-1.35)        |
| >= 160                                                                           | 73     | 29014                                | 1.28 (0.89-1.83)     | 1.03 (0.72-1.49)     | 1.10 (0.75-1.60)     | 0.99 (0.63-1.58)     | 1.01 (0.55-1.85)     |                      | 1.03 (0.59-1.79)                     | 1.14 (0.68-1.90)                    |                      | 1.19 (0.52-2.72)        |
| <b>p-trend</b>                                                                   |        |                                      | 0.416                | 0.757                | 0.93                 | 0.684                | 0.991                |                      | 0.824                                | 0.925                               |                      | 0.81                    |
| <b>Diastolic Blood Pressure (mmHg) ASH classification</b>                        |        |                                      |                      |                      |                      |                      |                      |                      |                                      |                                     |                      |                         |
| < 80                                                                             | 136    | 132590                               | 1 (referent)         |                      | 1 (referent)                         | 1 (referent)                        |                      | 1 (referent)            |
| 80-89                                                                            | 134    | 106372                               | 0.91 (0.71-1.16)     | 0.82 (0.64-1.05)     | 0.88 (0.68-1.14)     | 0.71 (0.52-0.98)     | 1.02 (0.69-1.50)     |                      | 0.73 (0.51-1.04)                     | 0.96 (0.68-1.35)                    |                      | 0.87 (0.52-1.46)        |
| 90-99                                                                            | 94     | 51196                                | 1.16 (0.88-1.51)     | 0.98 (0.74-1.29)     | 1.07 (0.81-1.43)     | 0.90 (0.64-1.27)     | 1.06 (0.66-1.71)     | 0.093                | 0.98 (0.64-1.50)                     | 1.10 (0.76-1.59)                    | 0.161                | 0.93 (0.50-1.76)        |
| >= 100                                                                           | 39     | 17160                                | 1.40 (0.98-2.01)     | 1.11 (0.77-1.61)     | 1.28 (0.87-1.86)     | 0.85 (0.53-1.37)     | 1.87 (1.03-3.37)     |                      | 0.79 (0.38-1.67)                     | 1.40 (0.89-2.20)                    |                      | 1.33 (0.58-3.01)        |
| <b>p-trend</b>                                                                   |        |                                      | 0.061                | 0.656                | 0.206                | 0.635                | 0.146                |                      | 0.528                                | 0.146                               |                      | 0.754                   |
| <b>Mean BP (mmHg) (1/3SBP+2/3DBP) Cohort-specific quartiles</b>                  |        |                                      |                      |                      |                      |                      |                      |                      |                                      |                                     |                      |                         |
| 50.0-88.3                                                                        | 64     | 76991                                | 1 (referent)         |                      | 1 (referent)                         | 1 (referent)                        |                      | 1 (referent)            |
| 88.5-96.6                                                                        | 86     | 77727                                | 0.93 (0.67-1.29)     | 0.83 (0.60-1.15)     | 0.76 (0.53-1.07)     | 0.73 (0.48-1.12)     | 0.95 (0.57-1.59)     |                      | 0.74 (0.48-1.16)                     | 1.00 (0.60-1.67)                    |                      | 0.99 (0.54-1.81)        |
| 96.8-105.5                                                                       | 97     | 76327                                | 0.88 (0.64-1.22)     | 0.74 (0.54-1.03)     | 0.77 (0.55-1.07)     | 0.65 (0.42-0.99)     | 0.88 (0.53-1.48)     | 0.313                | 0.78 (0.50-1.22)                     | 0.81 (0.49-1.34)                    | 0.729                | 0.73 (0.37-1.44)        |
| 105.6-216.6                                                                      | 156    | 76273                                | 1.15 (0.85-1.56)     | 0.92 (0.67-1.25)     | 0.94 (0.68-1.30)     | 0.79 (0.53-1.19)     | 1.11 (0.68-1.84)     |                      | 0.92 (0.59-1.43)                     | 1.04 (0.65-1.67)                    |                      | 1.00 (0.51-1.95)        |
| <b>p-trend</b>                                                                   |        |                                      | 0.231                | 0.829                | 0.783                | 0.527                | 0.633                |                      | 0.87                                 | 0.779                               |                      | 0.811                   |
| <b>Hypertension (SBP &gt;= 140 mmHg, or DBP &gt;= 90 mmHg, or self-reported)</b> |        |                                      |                      |                      |                      |                      |                      |                      |                                      |                                     |                      |                         |
| <b>Normotensive</b>                                                              | 193    | 174179                               | 1 (referent)         |                      | 1 (referent)                         | 1 (referent)                        |                      | 1 (referent)            |
| <b>Hypertensive</b>                                                              | 210    | 133139                               | 0.91 (0.74-1.12)     | 0.83 (0.67-1.02)     | 0.87 (0.70-1.08)     | 0.81 (0.62-1.05)     | 0.87 (0.61-1.23)     | 0.538                | 0.85 (0.62-1.17)                     | 0.84 (0.64-1.11)                    | 0.995                | 0.72 (0.45-1.15)        |

| Age > 53 yrs                                                                                                              | Age           | Never smokers                                                                                                             | Ever smokers                                                                                                              | Smoking       | Alcohol <= 12g                                                                                                            | Alcohol > 12g                                                                                                             | Alcohol       | No antihypertensive treatment                                                                                             | Antihypertensive treatment                         | Treatment     | Gastic AC                                                                                                                     |
|---------------------------------------------------------------------------------------------------------------------------|---------------|---------------------------------------------------------------------------------------------------------------------------|---------------------------------------------------------------------------------------------------------------------------|---------------|---------------------------------------------------------------------------------------------------------------------------|---------------------------------------------------------------------------------------------------------------------------|---------------|---------------------------------------------------------------------------------------------------------------------------|----------------------------------------------------|---------------|-------------------------------------------------------------------------------------------------------------------------------|
| HR (adjusted)                                                                                                             | p-interaction | HR (adjusted)                                                                                                             | HR (adjusted)                                                                                                             | p-interaction | HR (adjusted)                                                                                                             | HR (adjusted)                                                                                                             | p-interaction | HR (adjusted)                                                                                                             | HR (adjusted)                                      | p-interaction |                                                                                                                               |
| 315<br>154015                                                                                                             |               | 134<br>141931                                                                                                             | 261<br>160623                                                                                                             |               | 237<br>205214                                                                                                             | 166<br>102104                                                                                                             |               | 264<br>227336                                                                                                             | 53<br>37017                                        |               | Cases<br>Cohort size                                                                                                          |
| 1.005 (0.946-1.067)                                                                                                       | 0.48          | 1.040 (0.945-1.144)                                                                                                       | 0.988 (0.923-1.057)                                                                                                       | 0.192         | 1.013 (0.943-1.089)                                                                                                       | 1.003 (0.921-1.091)                                                                                                       | 0.821         | 1.014 (0.944-1.090)                                                                                                       | 1.217 (1.059-1.398)                                | 0.035         | Mean Systolic Blood Pressure continuous (per 10mmHg increase)                                                                 |
| 1.054 (0.946-1.175)                                                                                                       | 0.698         | 1.107 (0.932-1.313)                                                                                                       | 1.026 (0.910-1.156)                                                                                                       | 0.166         | 1.076 (0.948-1.221)                                                                                                       | 1.024 (0.879-1.192)                                                                                                       | 0.632         | 1.042 (0.915-1.186)                                                                                                       | 1.654 (1.272-2.152)                                | 0.005         | Mean Diastolic Blood Pressure continuous (per 10mmHg increase)                                                                |
| 1.030 (0.939-1.129)                                                                                                       | 0.562         | 1.084 (0.936-1.256)                                                                                                       | 1.003 (0.905-1.111)                                                                                                       | 0.146         | 1.047 (0.940-1.167)                                                                                                       | 1.014 (0.890-1.154)                                                                                                       | 0.876         | 1.032 (0.923-1.154)                                                                                                       | 1.522 (1.214-1.907)                                | 0.005         | Mean Blood Pressure (1/3SBP+2/3DBP) continuous (per 10mmHg increase)                                                          |
| 1 (referent)<br>0.94 (0.62-1.42)<br>0.97 (0.65-1.45)<br>0.78 (0.53-1.15)<br>1.02 (0.66-1.59)<br>1.08 (0.58-2.00)<br>0.793 | 0.639         | 1 (referent)<br>0.84 (0.46-1.54)<br>0.83 (0.45-1.52)<br>0.80 (0.45-1.43)<br>1.01 (0.51-1.98)<br>1.12 (0.43-2.93)<br>0.923 | 1 (referent)<br>0.97 (0.64-1.47)<br>1.02 (0.68-1.54)<br>0.75 (0.50-1.14)<br>0.92 (0.56-1.51)<br>1.32 (0.69-2.54)<br>0.629 | 0.387         | 1 (referent)<br>0.95 (0.62-1.46)<br>0.91 (0.58-1.41)<br>0.92 (0.61-1.40)<br>0.86 (0.51-1.48)<br>1.39 (0.69-2.81)<br>0.993 | 1 (referent)<br>0.82 (0.48-1.43)<br>0.92 (0.54-1.56)<br>0.56 (0.32-0.95)<br>1.04 (0.58-1.86)<br>1.15 (0.51-2.57)<br>0.713 | 0.972         | 1 (referent)<br>0.99 (0.67-1.46)<br>1.01 (0.68-1.51)<br>0.86 (0.57-1.28)<br>1.10 (0.66-1.83)<br>1.73 (0.85-3.53)<br>0.754 | no cases in referent<br>-<br>-<br>-<br>-<br>-<br>- | -             | ESH classification<br>< 120<br>120-129<br>130-139<br>140-159<br>160-179<br>>= 180<br>p-trend                                  |
| 1 (referent)<br>0.71 (0.50-0.99)<br>0.95 (0.68-1.34)<br>0.99 (0.73-1.35)<br>0.93 (0.58-1.50)<br>1.67 (0.83-3.33)<br>0.421 | 0.795         | 1 (referent)<br>0.75 (0.45-1.25)<br>1.01 (0.60-1.69)<br>0.93 (0.57-1.52)<br>1.02 (0.50-2.09)<br>1.92 (0.67-5.47)<br>0.581 | 1 (referent)<br>0.80 (0.56-1.15)<br>0.87 (0.59-1.28)<br>0.99 (0.70-1.39)<br>0.88 (0.51-1.52)<br>1.93 (0.92-4.03)<br>0.624 | 0.39          | 1 (referent)<br>0.65 (0.44-0.96)<br>1.00 (0.68-1.47)<br>1.02 (0.71-1.45)<br>0.85 (0.47-1.55)<br>1.95 (0.89-4.28)<br>0.404 | 1 (referent)<br>0.92 (0.59-1.43)<br>0.81 (0.49-1.35)<br>0.94 (0.60-1.45)<br>1.08 (0.58-2.00)<br>1.72 (0.67-4.40)<br>0.74  | 0.733         | 1 (referent)<br>0.72 (0.51-1.02)<br>0.97 (0.67-1.39)<br>0.93 (0.65-1.33)<br>0.97 (0.53-1.80)<br>1.65 (0.60-4.53)<br>0.804 | single case in referent<br>-<br>-<br>-<br>-<br>-   | -             | Diastolic Blood Pressure (mmHg)<br>ESH classification<br>< 80<br>80-84<br>85-89<br>90-99<br>100-109<br>>= 110<br>p-trend      |
| 1 (referent)<br>0.95 (0.66-1.38)<br>0.78 (0.53-1.15)<br>1.03 (0.68-1.58)<br>0.807                                         | 0.768         | 1 (referent)<br>0.83 (0.49-1.43)<br>0.80 (0.45-1.43)<br>1.03 (0.54-1.97)<br>0.879                                         | 1 (referent)<br>0.99 (0.69-1.44)<br>0.75 (0.50-1.13)<br>1.01 (0.64-1.59)<br>0.518                                         | 0.325         | 1 (referent)<br>0.93 (0.63-1.36)<br>0.92 (0.61-1.40)<br>0.98 (0.60-1.59)<br>0.928                                         | 1 (referent)<br>0.88 (0.54-1.41)<br>0.55 (0.32-0.95)<br>1.06 (0.60-1.84)<br>0.7                                           | 0.921         | 1 (referent)<br>1.00 (0.71-1.41)<br>0.85 (0.57-1.27)<br>1.22 (0.76-1.95)<br>0.818                                         | no cases in referent<br>-<br>-<br>-<br>-           | -             | Systolic Blood Pressure (mmHg)<br>ASH classification<br>< 120<br>120-139<br>140-159<br>>= 160<br>p-trend                      |
| 1 (referent)<br>0.81 (0.61-1.07)<br>0.99 (0.73-1.34)<br>1.07 (0.70-1.62)<br>0.733                                         | 0.633         | 1 (referent)<br>0.86 (0.56-1.31)<br>0.93 (0.57-1.51)<br>1.18 (0.62-2.22)<br>0.797                                         | 1 (referent)<br>0.83 (0.61-1.13)<br>0.99 (0.70-1.39)<br>1.07 (0.67-1.71)<br>0.809                                         | 0.437         | 1 (referent)<br>0.79 (0.58-1.09)<br>1.01 (0.71-1.45)<br>1.06 (0.64-1.75)<br>0.796                                         | 1 (referent)<br>0.88 (0.59-1.29)<br>0.94 (0.60-1.45)<br>1.20 (0.69-2.09)<br>0.695                                         | 0.964         | 1 (referent)<br>0.82 (0.61-1.09)<br>0.93 (0.65-1.32)<br>1.08 (0.62-1.86)<br>0.861                                         | single case in referent<br>-<br>-<br>-<br>-        | -             | Diastolic Blood Pressure (mmHg)<br>ASH classification<br>< 80<br>80-89<br>88.5-96.6<br>90-99<br>>= 100<br>p-trend             |
| 1 (referent)<br>0.78 (0.52-1.15)<br>0.73 (0.50-1.07)<br>0.88 (0.62-1.27)<br>0.895                                         | 0.774         | 1 (referent)<br>1.18 (0.63-2.21)<br>0.98 (0.52-1.84)<br>1.25 (0.67-2.31)<br>0.558                                         | 1 (referent)<br>0.75 (0.50-1.11)<br>0.71 (0.48-1.05)<br>0.81 (0.56-1.18)<br>0.463                                         | 0.131         | 1 (referent)<br>0.88 (0.58-1.34)<br>0.80 (0.52-1.22)<br>1.06 (0.70-1.58)<br>0.635                                         | 1 (referent)<br>0.74 (0.43-1.25)<br>0.66 (0.39-1.11)<br>0.73 (0.44-1.21)<br>0.355                                         | 0.445         | 1 (referent)<br>0.94 (0.65-1.37)<br>0.84 (0.57-1.23)<br>0.99 (0.67-1.47)<br>0.907                                         | no cases in referent<br>-<br>-<br>-<br>-           | -             | Mean BP (mmHg) (1/3SBP+2/3DBP)<br>Cohort-specific quartiles<br>50.0-88.3<br>88.5-96.6<br>96.8-105.5<br>105.6-216.6<br>p-trend |
| 1 (referent)<br>0.85 (0.67-1.08)                                                                                          | 0.957         | 1 (referent)<br>0.76 (0.52-1.09)                                                                                          | 1 (referent)<br>0.84 (0.65-1.09)                                                                                          | 0.895         | 1 (referent)<br>0.88 (0.67-1.16)                                                                                          | 1 (referent)<br>0.76 (0.55-1.05)                                                                                          | 0.681         | -<br>1 (referent)                                                                                                         | -<br>1.05 (0.75-1.47)                              |               | Hypertension (SBP >= 140 mmHg,<br>or DBP >= 90 mmHg, or self-reported)<br>Normotensive<br>Hypertensive                        |

| Colorectal                                                                       |        | Excluding first 2 years of follow-up |                     |                     | Men                 | Women               | Sex              | BMI <= 25 mg/m <sup>2</sup> | BMI > 25 mg/m <sup>2</sup> | BMI           | Age <= 53 yrs       |
|----------------------------------------------------------------------------------|--------|--------------------------------------|---------------------|---------------------|---------------------|---------------------|------------------|-----------------------------|----------------------------|---------------|---------------------|
| Cases                                                                            | Cohort | HR (crude)                           | HR (adjusted)       | HR (adjusted)       | HR (adjusted)       | HR (adjusted)       | p-interaction    | HR (adjusted)               | HR (adjusted)              | p-interaction | HR (adjusted)       |
| Cases                                                                            |        | 4625                                 | 4625                | 4265                | 2180                | 2445                |                  | 1846                        | 2779                       |               | 1140                |
| Cohort size                                                                      |        | 307318                               | 307318              | 301857              | 112591              | 194727              |                  | 146326                      | 160992                     |               | 153303              |
| <b>Mean Systolic Blood Pressure continuous (per 10mmHg increase)</b>             |        |                                      |                     |                     |                     |                     |                  |                             |                            |               |                     |
| 4625                                                                             | 307318 | 1.033 (1.018-1.049)                  | 1.011 (0.995-1.027) | 1.009 (0.993-1.027) | 1.030 (1.006-1.055) | 0.995 (0.973-1.017) | 0.014            | 0.984 (0.959-1.010)         | 1.035 (1.015-1.056)        | 0.02          | 0.991 (0.955-1.029) |
| <b>Mean Diastolic Blood Pressure continuous (per 10mmHg increase)</b>            |        |                                      |                     |                     |                     |                     |                  |                             |                            |               |                     |
| 4625                                                                             | 307318 | 1.092 (1.063-1.123)                  | 1.043 (1.013-1.073) | 1.044 (1.013-1.075) | 1.053 (1.010-1.098) | 1.032 (0.992-1.075) | 0.233            | 1.011 (0.965-1.059)         | 1.077 (1.039-1.117)        | 0.029         | 1.023 (0.963-1.086) |
| <b>Mean Blood Pressure (1/3SBP+2/3DBP) continuous (per 10mmHg increase)</b>      |        |                                      |                     |                     |                     |                     |                  |                             |                            |               |                     |
| 4625                                                                             | 307318 | 1.070 (1.046-1.096)                  | 1.029 (1.004-1.055) | 1.029 (1.003-1.055) | 1.049 (1.012-1.088) | 1.011 (0.978-1.046) | 0.05             | 0.993 (0.954-1.033)         | 1.066 (1.033-1.099)        | 0.014         | 1.006 (0.953-1.061) |
| <b>Systolic Blood Pressure (mmHg) ESH classification</b>                         |        |                                      |                     |                     |                     |                     |                  |                             |                            |               |                     |
| < 120                                                                            | 812    | 86141                                | 1 (referent)        | 1 (referent)        | 1 (referent)        | 1 (referent)        |                  | 1 (referent)                | 1 (referent)               |               | 1 (referent)        |
| 120-129                                                                          | 835    | 66446                                | 1.00 (0.90-1.10)    | 0.93 (0.84-1.03)    | 0.92 (0.83-1.02)    | 0.98 (0.84-1.15)    | 0.91 (0.81-1.04) | 1.00 (0.88-1.14)            | 0.89 (0.76-1.03)           |               | 0.89 (0.75-1.05)    |
| 130-139                                                                          | 896    | 57482                                | 1.04 (0.94-1.15)    | 0.94 (0.85-1.04)    | 0.95 (0.86-1.06)    | 1.02 (0.87-1.19)    | 0.90 (0.79-1.02) | 0.87 (0.75-1.00)            | 1.03 (0.90-1.19)           |               | 0.92 (0.77-1.10)    |
| 140-159                                                                          | 1378   | 68235                                | 1.10 (1.01-1.21)    | 0.97 (0.88-1.07)    | 0.97 (0.88-1.07)    | 0.99 (0.85-1.15)    | 0.98 (0.87-1.11) | 0.84 (0.73-0.97)            | 1.11 (0.97-1.26)           | 0.002         | 0.92 (0.76-1.10)    |
| 160-179                                                                          | 520    | 22656                                | 1.12 (1.00-1.26)    | 0.97 (0.86-1.09)    | 0.98 (0.86-1.10)    | 1.10 (0.92-1.31)    | 0.87 (0.74-1.03) | 0.85 (0.70-1.04)            | 1.10 (0.94-1.29)           |               | 1.03 (0.77-1.37)    |
| >= 180                                                                           | 184    | 6358                                 | 1.37 (1.16-1.62)    | 1.17 (0.99-1.39)    | 1.14 (0.95-1.36)    | 1.34 (1.05-1.70)    | 1.04 (0.82-1.32) | 1.22 (0.91-1.64)            | 1.26 (1.02-1.55)           |               | 1.10 (0.64-1.89)    |
| p-trend                                                                          |        |                                      | 0.0001              | 0.384               | 0.434               | 0.08                | 0.646            | 0.048                       | 0.0005                     |               | 0.797               |
| <b>Diastolic Blood Pressure (mmHg) ESH classification</b>                        |        |                                      |                     |                     |                     |                     |                  |                             |                            |               |                     |
| < 80                                                                             | 1597   | 132590                               | 1 (referent)        | 1 (referent)        | 1 (referent)        | 1 (referent)        | 1 (referent)     | 1 (referent)                | 1 (referent)               |               | 1 (referent)        |
| 80-84                                                                            | 942    | 64872                                | 1.00 (0.92-1.09)    | 0.95 (0.87-1.03)    | 0.95 (0.87-1.03)    | 0.94 (0.83-1.06)    | 0.95 (0.85-1.06) | 0.93 (0.83-1.06)            | 0.98 (0.88-1.10)           |               | 0.94 (0.80-1.10)    |
| 85-89                                                                            | 713    | 41500                                | 1.09 (1.00-1.20)    | 1.01 (0.92-1.11)    | 1.01 (0.92-1.11)    | 0.93 (0.81-1.06)    | 1.09 (0.96-1.23) | 0.93 (0.81-1.08)            | 1.10 (0.98-1.23)           |               | 1.01 (0.84-1.21)    |
| 90-99                                                                            | 974    | 51196                                | 1.15 (1.06-1.25)    | 1.03 (0.95-1.12)    | 1.03 (0.94-1.13)    | 0.98 (0.87-1.11)    | 1.07 (0.95-1.21) | 0.91 (0.79-1.05)            | 1.14 (1.03-1.27)           | 0.013         | 0.94 (0.79-1.13)    |
| 100-109                                                                          | 313    | 13896                                | 1.33 (1.17-1.50)    | 1.15 (1.01-1.30)    | 1.16 (1.02-1.33)    | 1.10 (0.93-1.30)    | 1.19 (0.98-1.44) | 1.28 (1.03-1.60)            | 1.18 (1.01-1.37)           |               | 1.08 (0.81-1.45)    |
| >= 110                                                                           | 86     | 3264                                 | 1.62 (1.31-2.02)    | 1.36 (1.09-1.70)    | 1.33 (1.05-1.68)    | 1.42 (1.08-1.86)    | 1.20 (0.81-1.77) | 1.11 (0.65-1.88)            | 1.54 (1.21-1.97)           |               | 1.69 (1.07-2.67)    |
| p-trend                                                                          |        |                                      | 0.00000002          | 0.007               | 0.01                | 0.139               | 0.026            | 0.976                       | 0.00006                    |               | 0.517               |
| <b>Systolic Blood Pressure (mmHg) ASH classification</b>                         |        |                                      |                     |                     |                     |                     |                  |                             |                            |               |                     |
| < 120                                                                            | 812    | 86141                                | 1 (referent)        | 1 (referent)        | 1 (referent)        | 1 (referent)        | 1 (referent)     | 1 (referent)                | 1 (referent)               |               | 1 (referent)        |
| 120-139                                                                          | 1731   | 123928                               | 1.02 (0.94-1.11)    | 0.94 (0.86-1.02)    | 0.94 (0.86-1.02)    | 1.00 (0.87-1.16)    | 0.91 (0.81-1.01) | 0.94 (0.84-1.06)            | 0.96 (0.85-1.09)           |               | 0.90 (0.78-1.04)    |
| 140-159                                                                          | 1378   | 68235                                | 1.10 (1.01-1.21)    | 0.97 (0.88-1.07)    | 0.97 (0.88-1.06)    | 0.99 (0.85-1.15)    | 0.98 (0.87-1.11) | 0.84 (0.73-0.97)            | 1.10 (0.97-1.26)           | 0.013         | 0.91 (0.76-1.10)    |
| >= 160                                                                           | 704    | 29014                                | 1.17 (1.05-1.31)    | 1.01 (0.91-1.13)    | 1.01 (0.90-1.13)    | 1.15 (0.97-1.36)    | 0.91 (0.78-1.06) | 0.93 (0.78-1.12)            | 1.13 (0.98-1.31)           |               | 1.04 (0.80-1.35)    |
| p-trend                                                                          |        |                                      | 0.0006              | 0.532               | 0.633               | 0.123               | 0.545            | 0.088                       | 0.004                      |               | 0.713               |
| <b>Diastolic Blood Pressure (mmHg) ASH classification</b>                        |        |                                      |                     |                     |                     |                     |                  |                             |                            |               |                     |
| < 80                                                                             | 1597   | 132590                               | 1 (referent)        | 1 (referent)        | 1 (referent)        | 1 (referent)        | 1 (referent)     | 1 (referent)                | 1 (referent)               |               | 1 (referent)        |
| 80-89                                                                            | 1655   | 106372                               | 1.04 (0.97-1.11)    | 0.97 (0.91-1.05)    | 0.97 (0.90-1.05)    | 0.93 (0.84-1.04)    | 1.01 (0.92-1.10) | 0.93 (0.84-1.04)            | 1.03 (0.94-1.14)           |               | 0.97 (0.84-1.11)    |
| 90-99                                                                            | 974    | 51196                                | 1.15 (1.06-1.25)    | 1.03 (0.95-1.12)    | 1.03 (0.94-1.12)    | 0.98 (0.87-1.11)    | 1.07 (0.95-1.20) | 0.91 (0.79-1.05)            | 1.14 (1.03-1.27)           | 0.033         | 0.94 (0.79-1.13)    |
| >= 100                                                                           | 399    | 17160                                | 1.38 (1.24-1.55)    | 1.19 (1.06-1.33)    | 1.19 (1.06-1.34)    | 1.16 (1.00-1.36)    | 1.19 (1.00-1.42) | 1.26 (1.02-1.55)            | 1.25 (1.09-1.43)           |               | 1.19 (0.93-1.54)    |
| p-trend                                                                          |        |                                      | 0.00000001          | 0.015               | 0.019               | 0.139               | 0.063            | 0.873                       | 0.0004                     |               | 0.687               |
| <b>Mean BP (mmHg) (1/3SBP+2/3DBP) Cohort-specific quartiles</b>                  |        |                                      |                     |                     |                     |                     |                  |                             |                            |               |                     |
| 50.0-88.3                                                                        | 748    | 76991                                | 1 (referent)        | 1 (referent)        | 1 (referent)        | 1 (referent)        | 1 (referent)     | 1 (referent)                | 1 (referent)               |               | 1 (referent)        |
| 88.5-96.6                                                                        | 1008   | 77727                                | 1.02 (0.93-1.12)    | 0.96 (0.87-1.06)    | 0.94 (0.85-1.04)    | 1.09 (0.92-1.28)    | 0.90 (0.79-1.01) | 0.92 (0.81-1.05)            | 1.05 (0.91-1.22)           |               | 0.85 (0.72-1.00)    |
| 96.8-105.5                                                                       | 1232   | 76327                                | 1.06 (0.96-1.16)    | 0.95 (0.87-1.05)    | 0.96 (0.87-1.05)    | 0.98 (0.84-1.15)    | 0.96 (0.85-1.08) | 0.89 (0.78-1.01)            | 1.09 (0.94-1.25)           | 0.0006        | 0.91 (0.77-1.08)    |
| 105.6-216.6                                                                      | 1637   | 76273                                | 1.20 (1.09-1.31)    | 1.03 (0.94-1.14)    | 1.02 (0.93-1.13)    | 1.11 (0.95-1.29)    | 0.99 (0.88-1.12) | 0.89 (0.77-1.02)            | 1.23 (1.07-1.42)           |               | 0.94 (0.79-1.14)    |
| p-trend                                                                          |        |                                      | 0.000009            | 0.278               | 0.32                | 0.291               | 0.649            | 0.078                       | 0.0002                     |               | 0.727               |
| <b>Hypertension (SBP &gt;= 140 mmHg, or DBP &gt;= 90 mmHg, or self-reported)</b> |        |                                      |                     |                     |                     |                     |                  |                             |                            |               |                     |
| Normotensive                                                                     | 2104   | 174179                               | 1 (referent)        | 1 (referent)        | 1 (referent)        | 1 (referent)        | 1 (referent)     | 1 (referent)                | 1 (referent)               |               | 1 (referent)        |
| Hypertensive                                                                     | 2521   | 133139                               | 1.08 (1.02-1.15)    | 1.00 (0.94-1.07)    | 0.99 (0.93-1.06)    | 0.99 (0.90-1.08)    | 1.01 (0.93-1.10) | 0.87 (0.79-0.97)            | 1.13 (1.04-1.23)           | 0.0003        | 0.93 (0.82-1.05)    |



| Colon                                                                | Cases | Cohort | Excluding first 2 years of follow-up |                     |                     | Men                 | Women               | Sex           | BMI <= 25 mg/m <sup>2</sup> | BMI > 25 mg/m <sup>2</sup> | BMI           | Age <= 53 yrs       |
|----------------------------------------------------------------------|-------|--------|--------------------------------------|---------------------|---------------------|---------------------|---------------------|---------------|-----------------------------|----------------------------|---------------|---------------------|
|                                                                      |       |        | HR (crude)                           | HR (adjusted)       | HR (adjusted)       | HR (adjusted)       | HR (adjusted)       | HR (adjusted) | p-interaction               | HR (adjusted)              | HR (adjusted) | p-interaction       |
| Cases                                                                |       |        | 3003                                 | 3003                | 2779                | 1304                | 1699                |               | 1190                        | 1813                       |               | 700                 |
| Cohort size                                                          |       |        | 307318                               | 307318              | 301857              | 112591              | 194727              |               | 146326                      | 160992                     |               | 153303              |
| Mean Systolic Blood Pressure continuous (per 10mmHg increase)        | 3003  | 307318 | 1.032 (1.012-1.052)                  | 1.011 (0.991-1.031) | 1.008 (0.988-1.029) | 1.030 (0.999-1.062) | 0.998 (0.972-1.024) | 0.061         | 0.986 (0.955-1.019)         | 1.035 (1.010-1.062)        | 0.101         | 0.994 (0.948-1.043) |
| Mean Diastolic Blood Pressure continuous (per 10mmHg increase)       | 3003  | 307318 | 1.103 (1.066-1.141)                  | 1.060 (1.023-1.099) | 1.058 (1.020-1.098) | 1.080 (1.024-1.139) | 1.044 (0.996-1.096) | 0.103         | 1.040 (0.982-1.102)         | 1.088 (1.041-1.138)        | 0.163         | 1.022 (0.946-1.103) |
| Mean Blood Pressure (1/3SBP+2/3DBP) continuous (per 10mmHg increase) | 3003  | 307318 | 1.074 (1.044-1.106)                  | 1.038 (1.007-1.070) | 1.035 (1.002-1.068) | 1.063 (1.015-1.113) | 1.019 (0.979-1.061) | 0.055         | 1.008 (0.960-1.059)         | 1.071 (1.031-1.113)        | 0.095         | 1.007 (0.941-1.079) |
| Systolic Blood Pressure (mmHg) ESH classification                    |       |        |                                      |                     |                     |                     |                     |               |                             |                            |               |                     |
| < 120                                                                | 528   | 86141  | 1 (referent)                         | 1 (referent)        | 1 (referent)        | 1 (referent)        | 1 (referent)        |               | 1 (referent)                | 1 (referent)               |               | 1 (referent)        |
| 120-129                                                              | 534   | 66446  | 0.97 (0.86-1.09)                     | 0.92 (0.81-1.04)    | 0.89 (0.79-1.01)    | 1.01 (0.82-1.24)    | 0.88 (0.76-1.03)    |               | 1.01 (0.86-1.19)            | 0.85 (0.71-1.02)           |               | 0.86 (0.70-1.06)    |
| 130-139                                                              | 579   | 57482  | 1.02 (0.90-1.15)                     | 0.94 (0.83-1.06)    | 0.93 (0.82-1.05)    | 0.97 (0.79-1.19)    | 0.94 (0.80-1.09)    |               | 0.86 (0.71-1.03)            | 1.03 (0.86-1.22)           |               | 0.94 (0.75-1.17)    |
| 140-159                                                              | 896   | 68235  | 1.08 (0.97-1.21)                     | 0.97 (0.86-1.09)    | 0.94 (0.84-1.06)    | 1.00 (0.82-1.21)    | 0.97 (0.84-1.13)    | 0.134         | 0.84 (0.71-1.00)            | 1.10 (0.93-1.29)           | 0.02          | 0.90 (0.71-1.14)    |
| 160-179                                                              | 352   | 22656  | 1.13 (0.98-1.30)                     | 0.99 (0.86-1.15)    | 0.99 (0.85-1.15)    | 1.14 (0.91-1.44)    | 0.89 (0.73-1.08)    |               | 0.90 (0.71-1.15)            | 1.11 (0.92-1.34)           |               | 1.14 (0.80-1.62)    |
| >= 180                                                               | 114   | 6358   | 1.27 (1.03-1.57)                     | 1.10 (0.89-1.35)    | 1.04 (0.83-1.30)    | 1.23 (0.89-1.69)    | 1.02 (0.76-1.36)    |               | 1.13 (0.78-1.65)            | 1.18 (0.91-1.54)           |               | 0.79 (0.35-1.80)    |
| p-trend                                                              |       |        | 0.005                                | 0.508               | 0.683               | 0.204               | 0.845               |               | 0.122                       | 0.005                      |               | 0.871               |
| Diastolic Blood Pressure (mmHg) ESH classification                   |       |        |                                      |                     |                     |                     |                     |               |                             |                            |               |                     |
| < 80                                                                 | 1034  | 132590 | 1 (referent)                         | 1 (referent)        | 1 (referent)        | 1 (referent)        | 1 (referent)        |               | 1 (referent)                | 1 (referent)               |               | 1 (referent)        |
| 80-84                                                                | 602   | 64872  | 0.98 (0.88-1.08)                     | 0.94 (0.85-1.04)    | 0.92 (0.83-1.03)    | 0.94 (0.80-1.10)    | 0.94 (0.82-1.07)    |               | 0.94 (0.81-1.10)            | 0.96 (0.83-1.10)           |               | 0.85 (0.69-1.04)    |
| 85-89                                                                | 467   | 41500  | 1.10 (0.99-1.23)                     | 1.03 (0.92-1.15)    | 1.02 (0.91-1.15)    | 0.93 (0.77-1.10)    | 1.12 (0.97-1.30)    |               | 0.94 (0.78-1.13)            | 1.13 (0.98-1.30)           |               | 1.01 (0.81-1.27)    |
| 90-99                                                                | 633   | 51196  | 1.15 (1.04-1.27)                     | 1.05 (0.94-1.16)    | 1.03 (0.93-1.15)    | 1.02 (0.87-1.20)    | 1.05 (0.91-1.21)    | 0.478         | 0.93 (0.78-1.11)            | 1.15 (1.00-1.31)           | 0.072         | 0.82 (0.65-1.04)    |
| 100-109                                                              | 209   | 13896  | 1.36 (1.17-1.58)                     | 1.20 (1.02-1.39)    | 1.20 (1.02-1.40)    | 1.21 (0.98-1.50)    | 1.13 (0.90-1.43)    |               | 1.40 (1.07-1.83)            | 1.20 (0.99-1.45)           |               | 1.19 (0.84-1.68)    |
| >= 110                                                               | 58    | 3264   | 1.68 (1.29-2.19)                     | 1.44 (1.10-1.88)    | 1.42 (1.07-1.87)    | 1.32 (0.92-1.89)    | 1.57 (1.04-2.37)    |               | 1.40 (0.77-2.55)            | 1.56 (1.16-2.11)           |               | 1.44 (0.78-2.66)    |
| p-trend                                                              |       |        | 0.000002                             | 0.005               | 0.011               | 0.066               | 0.042               |               | 0.477                       | 0.0003                     |               | 0.99                |
| Systolic Blood Pressure (mmHg) ASH classification                    |       |        |                                      |                     |                     |                     |                     |               |                             |                            |               |                     |
| < 120                                                                | 528   | 86141  | 1 (referent)                         | 1 (referent)        | 1 (referent)        | 1 (referent)        | 1 (referent)        |               | 1 (referent)                | 1 (referent)               |               | 1 (referent)        |
| 120-139                                                              | 1113  | 123928 | 0.99 (0.89-1.10)                     | 0.93 (0.83-1.03)    | 0.91 (0.81-1.02)    | 0.99 (0.82-1.19)    | 0.91 (0.79-1.04)    |               | 0.94 (0.81-1.09)            | 0.94 (0.81-1.11)           |               | 0.89 (0.74-1.07)    |
| 140-159                                                              | 896   | 68235  | 1.08 (0.97-1.21)                     | 0.97 (0.86-1.09)    | 0.94 (0.83-1.06)    | 1.00 (0.82-1.21)    | 0.97 (0.84-1.12)    | 0.074         | 0.84 (0.71-1.00)            | 1.09 (0.93-1.29)           | 0.079         | 0.90 (0.71-1.13)    |
| >= 160                                                               | 466   | 29014  | 1.16 (1.01-1.32)                     | 1.01 (0.88-1.16)    | 1.00 (0.87-1.15)    | 1.16 (0.93-1.45)    | 0.92 (0.76-1.10)    |               | 0.96 (0.77-1.19)            | 1.12 (0.93-1.34)           |               | 1.08 (0.77-1.50)    |
| p-trend                                                              |       |        | 0.008                                | 0.579               | 0.771               | 0.145               | 0.617               |               | 0.238                       | 0.021                      |               | 0.79                |
| Diastolic Blood Pressure (mmHg) ASH classification                   |       |        |                                      |                     |                     |                     |                     |               |                             |                            |               |                     |
| < 80                                                                 | 1034  | 132590 | 1 (referent)                         | 1 (referent)        | 1 (referent)        | 1 (referent)        | 1 (referent)        |               | 1 (referent)                | 1 (referent)               |               | 1 (referent)        |
| 80-89                                                                | 1069  | 106372 | 1.03 (0.94-1.12)                     | 0.98 (0.89-1.07)    | 0.96 (0.88-1.06)    | 0.93 (0.81-1.07)    | 1.01 (0.90-1.13)    |               | 0.94 (0.82-1.07)            | 1.03 (0.92-1.16)           |               | 0.91 (0.76-1.08)    |
| 90-99                                                                | 633   | 51196  | 1.15 (1.04-1.27)                     | 1.04 (0.94-1.16)    | 1.03 (0.92-1.15)    | 1.02 (0.87-1.20)    | 1.05 (0.91-1.21)    | 0.256         | 0.93 (0.78-1.11)            | 1.15 (1.00-1.31)           | 0.15          | 0.82 (0.64-1.04)    |
| >= 100                                                               | 267   | 17160  | 1.42 (1.24-1.63)                     | 1.24 (1.08-1.43)    | 1.24 (1.07-1.43)    | 1.23 (1.01-1.50)    | 1.21 (0.98-1.49)    |               | 1.40 (1.09-1.80)            | 1.27 (1.07-1.51)           |               | 1.23 (0.90-1.69)    |
| p-trend                                                              |       |        | 0.000001                             | 0.013               | 0.025               | 0.052               | 0.136               |               | 0.407                       | 0.002                      |               | 0.779               |
| Mean BP (mmHg) (1/3SBP+2/3DBP) Cohort-specific quartiles             |       |        |                                      |                     |                     |                     |                     |               |                             |                            |               |                     |
| 50.0-88.3                                                            | 481   | 76991  | 1 (referent)                         | 1 (referent)        | 1 (referent)        | 1 (referent)        | 1 (referent)        |               | 1 (referent)                | 1 (referent)               |               | 1 (referent)        |
| 88.5-96.6                                                            | 659   | 77727  | 1.02 (0.91-1.15)                     | 0.98 (0.87-1.10)    | 0.95 (0.84-1.07)    | 1.15 (0.93-1.42)    | 0.91 (0.78-1.05)    |               | 0.96 (0.82-1.13)            | 1.04 (0.87-1.25)           |               | 0.94 (0.76-1.15)    |
| 96.8-105.5                                                           | 771   | 76327  | 1.01 (0.90-1.14)                     | 0.93 (0.83-1.05)    | 0.92 (0.81-1.04)    | 0.98 (0.80-1.21)    | 0.94 (0.81-1.08)    | 0.186         | 0.84 (0.71-0.99)            | 1.08 (0.90-1.29)           | 0.004         | 0.83 (0.66-1.04)    |
| 105.6-216.6                                                          | 1092  | 76273  | 1.22 (1.09-1.37)                     | 1.07 (0.96-1.21)    | 1.05 (0.93-1.18)    | 1.19 (0.97-1.47)    | 1.03 (0.89-1.19)    |               | 0.95 (0.80-1.12)            | 1.27 (1.07-1.50)           |               | 0.97 (0.76-1.22)    |
| p-trend                                                              |       |        | 0.0001                               | 0.148               | 0.243               | 0.143               | 0.5                 |               | 0.276                       | 0.0004                     |               | 0.53                |
| Hypertension (SBP >= 140 mmHg, or DBP >= 90 mmHg, or self-reported)  |       |        |                                      |                     |                     |                     |                     |               |                             |                            |               |                     |
| Normotensive                                                         | 1347  | 174179 | 1 (referent)                         | 1 (referent)        | 1 (referent)        | 1 (referent)        | 1 (referent)        |               | 1 (referent)                | 1 (referent)               |               | 1 (referent)        |
| Hypertensive                                                         | 1656  | 133139 | 1.10 (1.02-1.18)                     | 1.02 (0.94-1.10)    | 1.00 (0.92-1.08)    | 1.02 (0.91-1.15)    | 1.01 (0.91-1.12)    | 0.466         | 0.87 (0.77-0.98)            | 1.17 (1.06-1.30)           | 0.0009        | 0.86 (0.73-1.02)    |



**Rectum and  
rectosigmoid Junction**

|                                                                                      | Cases | Cohort | HR (crude)          | HR (adjusted)       | Excluding first<br>2 years of follow-up<br>HR (adjusted) | Men<br>HR (adjusted) | Women<br>HR (adjusted) | Sex<br>p-interaction | BMI <= 25 mg/m <sup>2</sup><br>HR (adjusted) | BMI > 25 mg/m <sup>2</sup><br>HR (adjusted) | BMI<br>p-interaction | Age <= 53 yrs<br>HR (adjusted) |
|--------------------------------------------------------------------------------------|-------|--------|---------------------|---------------------|----------------------------------------------------------|----------------------|------------------------|----------------------|----------------------------------------------|---------------------------------------------|----------------------|--------------------------------|
| Cases                                                                                |       |        | 1622                | 1622                | 1486                                                     | 876                  | 746                    |                      | 656                                          | 966                                         |                      | 440                            |
| Cohort size                                                                          |       |        | 307318              | 307318              | 301857                                                   | 112591               | 194727                 |                      | 146326                                       | 160992                                      |                      | 153303                         |
| <b>Mean Systolic Blood Pressure<br/>continuous (per 10mmHg increase)</b>             | 1622  | 307318 | 1.036 (1.010-1.063) | 1.010 (0.983-1.038) | 1.011 (0.983-1.040)                                      | 1.030 (0.992-1.069)  | 0.987 (0.949-1.028)    | 0.082                | 0.979 (0.936-1.023)                          | 1.035 (1.000-1.071)                         | 0.088                | 0.986 (0.929-1.047)            |
| <b>Mean Diastolic Blood Pressure<br/>continuous (per 10mmHg increase)</b>            | 1622  | 307318 | 1.073 (1.024-1.124) | 1.010 (0.962-1.061) | 1.016 (0.965-1.069)                                      | 1.013 (0.948-1.083)  | 1.005 (0.935-1.081)    | 0.855                | 0.957 (0.885-1.036)                          | 1.055 (0.993-1.122)                         | 0.074                | 1.024 (0.930-1.128)            |
| <b>Mean Blood Pressure (1/3SBP+2/3DBP)<br/>continuous (per 10mmHg increase)</b>      | 1622  | 307318 | 1.063 (1.022-1.106) | 1.013 (0.971-1.056) | 1.016 (0.973-1.062)                                      | 1.030 (0.973-1.090)  | 0.992 (0.933-1.056)    | 0.316                | 0.963 (0.900-1.030)                          | 1.054 (1.001-1.111)                         | 0.059                | 1.003 (0.920-1.093)            |
| <b>Systolic Blood Pressure (mmHg)<br/>ESH classification</b>                         |       |        |                     |                     |                                                          |                      |                        |                      |                                              |                                             |                      |                                |
| < 120                                                                                | 284   | 86141  | 1 (referent)        | 1 (referent)        | 1 (referent)                                             | 1 (referent)         | 1 (referent)           |                      | 1 (referent)                                 | 1 (referent)                                |                      | 1 (referent)                   |
| 120-129                                                                              | 301   | 66446  | 1.05 (0.89-1.23)    | 0.95 (0.81-1.12)    | 0.97 (0.82-1.16)                                         | 0.95 (0.74-1.22)     | 0.98 (0.79-1.22)       |                      | 0.98 (0.79-1.23)                             | 0.95 (0.74-1.22)                            |                      | 0.93 (0.72-1.22)               |
| 130-139                                                                              | 317   | 57482  | 1.09 (0.92-1.28)    | 0.95 (0.81-1.13)    | 1.00 (0.84-1.19)                                         | 1.10 (0.86-1.40)     | 0.81 (0.64-1.03)       |                      | 0.89 (0.70-1.13)                             | 1.04 (0.82-1.32)                            |                      | 0.90 (0.68-1.20)               |
| 140-159                                                                              | 482   | 68235  | 1.14 (0.98-1.34)    | 0.98 (0.83-1.14)    | 1.01 (0.86-1.19)                                         | 0.99 (0.78-1.25)     | 0.99 (0.79-1.23)       | 0.139                | 0.84 (0.66-1.06)                             | 1.12 (0.90-1.41)                            | 0.047                | 0.94 (0.70-1.25)               |
| 160-179                                                                              | 168   | 22656  | 1.10 (0.90-1.34)    | 0.93 (0.76-1.14)    | 0.95 (0.76-1.14)                                         | 1.03 (0.77-1.37)     | 0.82 (0.60-1.12)       |                      | 0.75 (0.53-1.07)                             | 1.09 (0.83-1.42)                            |                      | 0.85 (0.52-1.39)               |
| >= 180                                                                               | 70    | 6358   | 1.57 (1.20-2.06)    | 1.32 (1.00-1.73)    | 1.33 (1.00-1.78)                                         | 1.51 (1.04-2.18)     | 1.11 (0.72-1.70)       |                      | 1.39 (0.87-2.22)                             | 1.41 (0.99-1.99)                            |                      | 1.56 (0.75-3.23)               |
| p-trend                                                                              |       |        | 0.011               | 0.594               | 0.468                                                    | 0.229                | 0.584                  |                      | 0.21                                         | 0.041                                       |                      | 0.819                          |
| <b>Diastolic Blood Pressure (mmHg)<br/>ESH classification</b>                        |       |        |                     |                     |                                                          |                      |                        |                      |                                              |                                             |                      |                                |
| < 80                                                                                 | 563   | 132590 | 1 (referent)        | 1 (referent)        | 1 (referent)                                             | 1 (referent)         | 1 (referent)           |                      | 1 (referent)                                 | 1 (referent)                                |                      | 1 (referent)                   |
| 80-84                                                                                | 340   | 64872  | 1.04 (0.91-1.19)    | 0.97 (0.85-1.11)    | 0.99 (0.86-1.14)                                         | 0.95 (0.78-1.15)     | 0.99 (0.81-1.21)       |                      | 0.92 (0.75-1.13)                             | 1.03 (0.86-1.25)                            |                      | 1.10 (0.85-1.42)               |
| 85-89                                                                                | 246   | 41500  | 1.08 (0.93-1.25)    | 0.97 (0.83-1.13)    | 0.99 (0.84-1.16)                                         | 0.93 (0.75-1.15)     | 1.01 (0.80-1.26)       |                      | 0.92 (0.72-1.18)                             | 1.05 (0.86-1.28)                            |                      | 1.01 (0.75-1.37)               |
| 90-99                                                                                | 341   | 51196  | 1.16 (1.01-1.33)    | 1.01 (0.88-1.16)    | 1.03 (0.89-1.19)                                         | 0.93 (0.76-1.12)     | 1.12 (0.91-1.38)       | 0.514                | 0.87 (0.68-1.10)                             | 1.13 (0.95-1.36)                            | 0.082                | 1.15 (0.87-1.53)               |
| 100-109                                                                              | 104   | 13896  | 1.27 (1.03-1.57)    | 1.07 (0.86-1.32)    | 1.10 (0.88-1.38)                                         | 0.92 (0.69-1.23)     | 1.31 (0.94-1.83)       |                      | 1.08 (0.73-1.61)                             | 1.13 (0.87-1.47)                            |                      | 0.90 (0.54-1.51)               |
| >= 110                                                                               | 28    | 3264   | 1.52 (1.04-2.22)    | 1.23 (0.84-1.80)    | 1.17 (0.77-1.77)                                         | 1.58 (1.05-2.38)     | 0.31 (0.08-1.24)       |                      | 0.62 (0.20-1.95)                             | 1.50 (0.99-2.28)                            |                      | 2.13 (1.08-4.22)               |
| p-trend                                                                              |       |        | 0.002               | 0.469               | 0.376                                                    | 0.934                | 0.337                  |                      | 0.363                                        | 0.055                                       |                      | 0.31                           |
| <b>Systolic Blood Pressure (mmHg)<br/>ASH classification</b>                         |       |        |                     |                     |                                                          |                      |                        |                      |                                              |                                             |                      |                                |
| < 120                                                                                | 284   | 86141  | 1 (referent)        | 1 (referent)        | 1 (referent)                                             | 1 (referent)         | 1 (referent)           |                      | 1 (referent)                                 | 1 (referent)                                |                      | 1 (referent)                   |
| 120-139                                                                              | 618   | 123928 | 1.07 (0.92-1.23)    | 0.95 (0.82-1.10)    | 0.99 (0.85-1.15)                                         | 1.02 (0.82-1.28)     | 0.90 (0.74-1.09)       |                      | 0.94 (0.77-1.15)                             | 1.00 (0.80-1.24)                            |                      | 0.92 (0.73-1.16)               |
| 140-159                                                                              | 482   | 68235  | 1.14 (0.98-1.33)    | 0.97 (0.83-1.14)    | 1.01 (0.85-1.19)                                         | 0.98 (0.77-1.24)     | 0.99 (0.80-1.24)       | 0.33                 | 0.84 (0.66-1.06)                             | 1.12 (0.89-1.41)                            | 0.072                | 0.94 (0.70-1.25)               |
| >= 160                                                                               | 238   | 29014  | 1.20 (1.00-1.44)    | 1.01 (0.84-1.22)    | 1.03 (0.84-1.25)                                         | 1.13 (0.86-1.47)     | 0.89 (0.68-1.18)       |                      | 0.89 (0.65-1.21)                             | 1.16 (0.90-1.49)                            |                      | 0.98 (0.64-1.51)               |
| p-trend                                                                              |       |        | 0.028               | 0.794               | 0.711                                                    | 0.519                | 0.721                  |                      | 0.195                                        | 0.09                                        |                      | 0.778                          |
| <b>Diastolic Blood Pressure (mmHg)<br/>ASH classification</b>                        |       |        |                     |                     |                                                          |                      |                        |                      |                                              |                                             |                      |                                |
| < 80                                                                                 | 563   | 132590 | 1 (referent)        | 1 (referent)        | 1 (referent)                                             | 1 (referent)         | 1 (referent)           |                      | 1 (referent)                                 | 1 (referent)                                |                      | 1 (referent)                   |
| 80-89                                                                                | 586   | 106372 | 1.06 (0.94-1.19)    | 0.97 (0.86-1.10)    | 0.99 (0.87-1.12)                                         | 0.94 (0.79-1.11)     | 1.00 (0.84-1.18)       |                      | 0.92 (0.77-1.10)                             | 1.04 (0.88-1.22)                            |                      | 1.07 (0.85-1.33)               |
| 90-99                                                                                | 341   | 51196  | 1.16 (1.01-1.33)    | 1.01 (0.88-1.16)    | 1.03 (0.89-1.19)                                         | 0.93 (0.77-1.12)     | 1.12 (0.91-1.38)       | 0.397                | 0.87 (0.68-1.10)                             | 1.13 (0.95-1.36)                            | 0.102                | 1.16 (0.87-1.53)               |
| >= 100                                                                               | 132   | 17160  | 1.32 (1.09-1.60)    | 1.10 (0.90-1.34)    | 1.11 (0.90-1.37)                                         | 1.05 (0.82-1.35)     | 1.14 (0.82-1.58)       |                      | 1.01 (0.69-1.47)                             | 1.20 (0.95-1.53)                            |                      | 1.13 (0.73-1.74)               |
| p-trend                                                                              |       |        | 0.002               | 0.485               | 0.363                                                    | 0.955                | 0.271                  |                      | 0.392                                        | 0.067                                       |                      | 0.325                          |
| <b>Mean BP (mmHg) (1/3SBP+2/3DBP)<br/>Cohort-specific quartiles</b>                  |       |        |                     |                     |                                                          |                      |                        |                      |                                              |                                             |                      |                                |
| 50.0-88.3                                                                            | 267   | 76991  | 1 (referent)        | 1 (referent)        | 1 (referent)                                             | 1 (referent)         | 1 (referent)           |                      | 1 (referent)                                 | 1 (referent)                                |                      | 1 (referent)                   |
| 88.5-96.6                                                                            | 349   | 77727  | 1.01 (0.86-1.19)    | 0.93 (0.79-1.09)    | 0.94 (0.79-1.11)                                         | 1.01 (0.79-1.30)     | 0.87 (0.70-1.08)       |                      | 0.84 (0.68-1.05)                             | 1.07 (0.83-1.38)                            |                      | 0.71 (0.54-0.94)               |
| 96.8-105.5                                                                           | 461   | 76327  | 1.14 (0.98-1.33)    | 0.99 (0.85-1.16)    | 1.02 (0.86-1.20)                                         | 0.98 (0.77-1.25)     | 1.01 (0.82-1.26)       | 0.77                 | 0.96 (0.78-1.20)                             | 1.10 (0.87-1.40)                            | 0.06                 | 1.03 (0.79-1.35)               |
| 105.6-216.6                                                                          | 545   | 76273  | 1.15 (0.99-1.35)    | 0.96 (0.82-1.12)    | 0.97 (0.82-1.15)                                         | 0.99 (0.78-1.26)     | 0.92 (0.74-1.15)       |                      | 0.78 (0.62-0.99)                             | 1.17 (0.92-1.48)                            |                      | 0.91 (0.67-1.22)               |
| p-trend                                                                              |       |        | 0.022               | 0.865               | 0.957                                                    | 0.905                | 0.842                  |                      | 0.132                                        | 0.15                                        |                      | 0.828                          |
| <b>Hypertension (SBP &gt;= 140 mmHg,<br/>or DBP &gt;= 90 mmHg, or self-reported)</b> |       |        |                     |                     |                                                          |                      |                        |                      |                                              |                                             |                      |                                |
| Normotensive                                                                         | 757   | 174179 | 1 (referent)        | 1 (referent)        | 1 (referent)                                             | 1 (referent)         | 1 (referent)           |                      | 1 (referent)                                 | 1 (referent)                                |                      | 1 (referent)                   |
| Hypertensive                                                                         | 865   | 133139 | 1.05 (0.95-1.17)    | 0.97 (0.88-1.08)    | 0.98 (0.88-1.09)                                         | 0.94 (0.81-1.08)     | 1.01 (0.87-1.18)       | 0.734                | 0.89 (0.75-1.05)                             | 1.06 (0.92-1.21)                            | 0.101                | 1.03 (0.84-1.27)               |



| Age > 53 yrs                                                                                                              | Age           | Never smokers                                                                                                             | Ever smokers                                                                                                              | Smoking       | Alcohol <= 12g                                                                                                            | Alcohol > 12g                                                                                                             | Alcohol       | No antihypertensive treatment                                                                                             | Antihypertensive treatment                                                                                                | Treatment     | Rectum and rectosigmoid Junction                                                                                               |
|---------------------------------------------------------------------------------------------------------------------------|---------------|---------------------------------------------------------------------------------------------------------------------------|---------------------------------------------------------------------------------------------------------------------------|---------------|---------------------------------------------------------------------------------------------------------------------------|---------------------------------------------------------------------------------------------------------------------------|---------------|---------------------------------------------------------------------------------------------------------------------------|---------------------------------------------------------------------------------------------------------------------------|---------------|--------------------------------------------------------------------------------------------------------------------------------|
| HR (adjusted)                                                                                                             | p-interaction | HR (adjusted)                                                                                                             | HR (adjusted)                                                                                                             | p-interaction | HR (adjusted)                                                                                                             | HR (adjusted)                                                                                                             | p-interaction | HR (adjusted)                                                                                                             | HR (adjusted)                                                                                                             | p-interaction |                                                                                                                                |
| 1182<br>154015                                                                                                            |               | 577<br>141931                                                                                                             | 1030<br>160623                                                                                                            |               | 937<br>205214                                                                                                             | 685<br>102104                                                                                                             |               | 1103<br>227336                                                                                                            | 221<br>37017                                                                                                              |               | Cases<br>Cohort size                                                                                                           |
| 1.017 (0.986-1.048)                                                                                                       | 0.397         | 1.011 (0.965-1.058)                                                                                                       | 1.005 (0.971-1.040)                                                                                                       | 0.86          | 0.991 (0.956-1.028)                                                                                                       | 1.039 (0.997-1.082)                                                                                                       | 0.183         | 1.005 (0.970-1.042)                                                                                                       | 1.031 (0.960-1.106)                                                                                                       | 0.38          | Mean Systolic Blood Pressure continuous (per 10mmHg increase)                                                                  |
| 1.004 (0.949-1.063)                                                                                                       | 0.805         | 1.029 (0.947-1.117)                                                                                                       | 0.993 (0.934-1.056)                                                                                                       | 0.975         | 0.984 (0.922-1.050)                                                                                                       | 1.056 (0.980-1.138)                                                                                                       | 0.171         | 1.016 (0.954-1.083)                                                                                                       | 1.048 (0.916-1.199)                                                                                                       | 0.486         | Mean Diastolic Blood Pressure continuous (per 10mmHg increase)                                                                 |
| 1.016 (0.968-1.065)                                                                                                       | 0.778         | 1.022 (0.953-1.097)                                                                                                       | 1.000 (0.949-1.054)                                                                                                       | 0.914         | 0.986 (0.932-1.042)                                                                                                       | 1.058 (0.993-1.127)                                                                                                       | 0.145         | 1.012 (0.959-1.069)                                                                                                       | 1.051 (0.936-1.180)                                                                                                       | 0.374         | Mean Blood Pressure (1/3SBP+2/3DBP) continuous (per 10mmHg increase)                                                           |
| 1 (referent)<br>0.97 (0.78-1.20)<br>0.99 (0.80-1.22)<br>1.00 (0.82-1.22)<br>0.96 (0.75-1.21)<br>1.32 (0.97-1.79)<br>0.438 | 0.609         | 1 (referent)<br>0.96 (0.73-1.26)<br>0.85 (0.64-1.12)<br>1.08 (0.83-1.40)<br>0.97 (0.69-1.36)<br>1.13 (0.68-1.89)<br>0.564 | 1 (referent)<br>0.94 (0.76-1.16)<br>1.00 (0.81-1.23)<br>0.90 (0.73-1.10)<br>0.88 (0.68-1.14)<br>1.35 (0.97-1.88)<br>0.943 | 0.984         | 1 (referent)<br>1.10 (0.89-1.35)<br>0.99 (0.80-1.23)<br>0.96 (0.78-1.19)<br>0.92 (0.70-1.21)<br>1.21 (0.83-1.78)<br>0.601 | 1 (referent)<br>0.75 (0.57-0.99)<br>0.90 (0.70-1.17)<br>0.98 (0.77-1.25)<br>0.93 (0.68-1.28)<br>1.44 (0.97-2.15)<br>0.109 | 0.215         | 1 (referent)<br>0.95 (0.79-1.14)<br>0.98 (0.81-1.19)<br>0.97 (0.81-1.17)<br>0.90 (0.69-1.18)<br>1.48 (1.01-2.17)<br>0.74  | 1 (referent)<br>1.16 (0.51-2.62)<br>0.93 (0.43-2.05)<br>0.98 (0.46-2.05)<br>0.92 (0.42-1.98)<br>1.28 (0.56-2.93)<br>0.888 | 0.766         | Systolic Blood Pressure (mmHg)<br>ESH classification<br>< 120<br>120-129<br>130-139<br>140-159<br>160-179<br>>= 180<br>p-trend |
| 1 (referent)<br>0.93 (0.79-1.09)<br>0.95 (0.80-1.14)<br>0.96 (0.82-1.13)<br>1.09 (0.86-1.38)<br>1.01 (0.63-1.60)<br>0.829 | 0.478         | 1 (referent)<br>0.96 (0.76-1.21)<br>1.03 (0.80-1.33)<br>1.17 (0.93-1.48)<br>1.02 (0.70-1.51)<br>1.00 (0.47-2.14)<br>0.302 | 1 (referent)<br>0.96 (0.81-1.14)<br>0.93 (0.76-1.12)<br>0.90 (0.75-1.07)<br>1.07 (0.82-1.39)<br>1.33 (0.85-2.07)<br>0.918 | 0.903         | 1 (referent)<br>0.90 (0.75-1.07)<br>0.88 (0.72-1.08)<br>0.90 (0.74-1.08)<br>1.25 (0.95-1.64)<br>0.72 (0.37-1.41)<br>0.811 | 1 (referent)<br>1.11 (0.89-1.38)<br>1.14 (0.90-1.44)<br>1.21 (0.97-1.50)<br>0.89 (0.63-1.28)<br>1.97 (1.22-3.18)<br>0.115 | 0.195         | 1 (referent)<br>1.02 (0.87-1.19)<br>1.06 (0.89-1.27)<br>0.99 (0.82-1.19)<br>0.93 (0.66-1.29)<br>2.12 (1.31-3.41)<br>0.496 | 1 (referent)<br>1.20 (0.71-2.02)<br>0.99 (0.58-1.69)<br>1.16 (0.73-1.86)<br>1.32 (0.77-2.25)<br>1.28 (0.59-2.80)<br>0.363 | 0.41          | Diastolic Blood Pressure (mmHg)<br>ESH classification<br>< 80<br>80-84<br>85-89<br>90-99<br>100-109<br>>= 110<br>p-trend       |
| 1 (referent)<br>0.98 (0.81-1.18)<br>1.00 (0.82-1.21)<br>1.04 (0.83-1.29)<br>0.633                                         | 0.684         | 1 (referent)<br>0.90 (0.71-1.15)<br>1.08 (0.83-1.40)<br>1.01 (0.74-1.39)<br>0.464                                         | 1 (referent)<br>0.97 (0.80-1.16)<br>0.89 (0.73-1.09)<br>0.98 (0.78-1.25)<br>0.611                                         | 0.701         | 1 (referent)<br>1.05 (0.87-1.26)<br>0.97 (0.78-1.19)<br>0.99 (0.77-1.27)<br>0.653                                         | 1 (referent)<br>0.83 (0.65-1.05)<br>0.97 (0.76-1.24)<br>1.04 (0.78-1.39)<br>0.288                                         | 0.417         | 1 (referent)<br>0.96 (0.82-1.13)<br>0.97 (0.80-1.16)<br>1.01 (0.79-1.29)<br>0.994                                         | 1 (referent)<br>1.02 (0.48-2.16)<br>0.98 (0.46-2.05)<br>1.01 (0.48-2.15)<br>0.997                                         | 0.757         | Systolic Blood Pressure (mmHg)<br>ASH classification<br>< 120<br>120-139<br>140-159<br>>= 160<br>p-trend                       |
| 1 (referent)<br>0.94 (0.81-1.08)<br>0.96 (0.82-1.13)<br>1.07 (0.86-1.34)<br>0.831                                         | 0.496         | 1 (referent)<br>0.99 (0.81-1.21)<br>1.17 (0.93-1.48)<br>1.02 (0.71-1.46)<br>0.374                                         | 1 (referent)<br>0.95 (0.81-1.10)<br>0.90 (0.75-1.07)<br>1.12 (0.88-1.42)<br>0.981                                         | 0.962         | 1 (referent)<br>0.89 (0.76-1.04)<br>0.90 (0.74-1.08)<br>1.15 (0.89-1.49)<br>0.988                                         | 1 (referent)<br>1.12 (0.92-1.36)<br>1.21 (0.97-1.50)<br>1.09 (0.80-1.49)<br>0.204                                         | 0.354         | 1 (referent)<br>1.03 (0.90-1.19)<br>0.99 (0.82-1.18)<br>1.12 (0.85-1.50)<br>0.67                                          | 1 (referent)<br>1.09 (0.68-1.75)<br>1.17 (0.73-1.87)<br>1.32 (0.79-2.20)<br>0.251                                         | 0.262         | Diastolic Blood Pressure (mmHg)<br>ASH classification<br>< 80<br>80-89<br>90-99<br>>= 100<br>p-trend                           |
| 1 (referent)<br>1.07 (0.87-1.31)<br>1.01 (0.82-1.23)<br>1.00 (0.82-1.22)<br>0.738                                         | 0.753         | 1 (referent)<br>0.96 (0.73-1.26)<br>1.00 (0.77-1.31)<br>1.10 (0.84-1.44)<br>0.343                                         | 1 (referent)<br>0.91 (0.74-1.11)<br>0.97 (0.80-1.19)<br>0.86 (0.70-1.05)<br>0.211                                         | 0.425         | 1 (referent)<br>1.01 (0.82-1.23)<br>1.00 (0.82-1.22)<br>0.92 (0.75-1.13)<br>0.391                                         | 1 (referent)<br>0.82 (0.62-1.08)<br>0.99 (0.76-1.27)<br>1.01 (0.78-1.31)<br>0.343                                         | 0.237         | 1 (referent)<br>0.90 (0.75-1.08)<br>1.02 (0.85-1.22)<br>0.95 (0.79-1.15)<br>0.987                                         | 1 (referent)<br>2.21 (0.77-6.37)<br>1.70 (0.61-4.77)<br>1.63 (0.59-4.49)<br>0.661                                         | 0.907         | Mean BP (mmHg) (1/3SBP+2/3DBP)<br>Cohort-specific quartiles<br>50.0-88.3<br>88.5-96.6<br>96.8-105.5<br>105.6-216.6<br>p-trend  |
| 1 (referent)<br>0.95 (0.84-1.08)                                                                                          | 0.476         | 1 (referent)<br>1.04 (0.87-1.24)                                                                                          | 1 (referent)<br>0.91 (0.80-1.04)                                                                                          | 0.401         | 1 (referent)<br>0.89 (0.78-1.02)                                                                                          | 1 (referent)<br>1.10 (0.94-1.30)                                                                                          | 0.048         | -<br>1 (referent)                                                                                                         | -<br>1.00 (0.85-1.19)                                                                                                     |               | Hypertension (SBP >= 140 mmHg, or DBP >= 90 mmHg, or self-reported)<br>Normotensive<br>Hypertensive                            |

| Liver                                                                            | Cases | Cohort | Excluding first 2 years of follow-up |                     |                     | Men                 | Women               | Sex           | BMI <= 25 mg/m <sup>2</sup> | BMI > 25 mg/m <sup>2</sup> | BMI           | Age <= 53 yrs       |
|----------------------------------------------------------------------------------|-------|--------|--------------------------------------|---------------------|---------------------|---------------------|---------------------|---------------|-----------------------------|----------------------------|---------------|---------------------|
|                                                                                  |       |        | HR (crude)                           | HR (adjusted)       | HR (adjusted)       | HR (adjusted)       | HR (adjusted)       | p-interaction | HR (adjusted)               | HR (adjusted)              | p-interaction | HR (adjusted)       |
| Cases                                                                            |       |        | 653                                  | 653                 | 587                 | 336                 | 317                 |               | 223                         | 430                        |               | 143                 |
| Cohort size                                                                      |       |        | 307318                               | 307318              | 301857              | 112591              | 194727              |               | 146326                      | 160992                     |               | 153303              |
| <b>Mean Systolic Blood Pressure continuous (per 10mmHg increase)</b>             | 653   | 307318 | 1.045 (1.004-1.088)                  | 1.008 (0.967-1.052) | 1.004 (0.960-1.050) | 1.014 (0.955-1.076) | 1.004 (0.945-1.066) | 0.272         | 0.997 (0.927-1.073)         | 1.029 (0.978-1.083)        | 0.571         | 0.978 (0.882-1.085) |
| <b>Mean Diastolic Blood Pressure continuous (per 10mmHg increase)</b>            | 653   | 307318 | 1.047 (0.972-1.127)                  | 0.975 (0.902-1.054) | 0.999 (0.921-1.084) | 0.971 (0.872-1.080) | 0.984 (0.879-1.102) | 0.822         | 1.007 (0.880-1.153)         | 0.999 (0.910-1.096)        | 0.99          | 0.920 (0.774-1.094) |
| <b>Mean Blood Pressure (1/3SBP+2/3DBP) continuous (per 10mmHg increase)</b>      | 653   | 307318 | 1.059 (0.995-1.126)                  | 0.995 (0.931-1.062) | 1.003 (0.935-1.075) | 0.996 (0.909-1.091) | 0.996 (0.905-1.095) | 0.493         | 1.001 (0.893-1.122)         | 1.023 (0.945-1.107)        | 0.769         | 0.943 (0.810-1.098) |
| <b>Systolic Blood Pressure (mmHg) ESH classification</b>                         |       |        |                                      |                     |                     |                     |                     |               |                             |                            |               |                     |
| < 120                                                                            | 100   | 86141  | 1 (referent)                         | 1 (referent)        | 1 (referent)        | 1 (referent)        | 1 (referent)        |               | 1 (referent)                | 1 (referent)               |               | 1 (referent)        |
| 120-129                                                                          | 105   | 66446  | 0.96 (0.73-1.26)                     | 0.87 (0.66-1.15)    | 0.89 (0.66-1.19)    | 0.85 (0.56-1.29)    | 0.89 (0.61-1.30)    |               | 0.84 (0.55-1.29)            | 0.90 (0.62-1.30)           |               | 0.86 (0.54-1.38)    |
| 130-139                                                                          | 138   | 57482  | 1.21 (0.93-1.57)                     | 1.04 (0.80-1.36)    | 1.06 (0.80-1.40)    | 1.00 (0.67-1.49)    | 1.10 (0.76-1.58)    |               | 1.33 (0.89-1.98)            | 0.94 (0.66-1.34)           |               | 0.90 (0.55-1.48)    |
| 140-159                                                                          | 211   | 68235  | 1.24 (0.97-1.59)                     | 1.02 (0.79-1.32)    | 1.00 (0.76-1.30)    | 0.94 (0.64-1.38)    | 1.12 (0.79-1.59)    | 0.488         | 1.21 (0.81-1.80)            | 0.99 (0.71-1.38)           | 0.87          | 0.80 (0.48-1.35)    |
| 160-179                                                                          | 74    | 22656  | 1.15 (0.84-1.57)                     | 0.91 (0.66-1.26)    | 0.86 (0.61-1.22)    | 0.84 (0.53-1.33)    | 1.00 (0.63-1.56)    |               | 0.75 (0.40-1.40)            | 1.01 (0.68-1.50)           |               | 0.94 (0.44-2.01)    |
| >= 180                                                                           | 25    | 6358   | 1.33 (0.85-2.09)                     | 1.01 (0.64-1.60)    | 1.08 (0.67-1.73)    | 1.19 (0.66-2.16)    | 0.76 (0.35-1.63)    |               | 0.57 (0.17-1.88)            | 1.19 (0.71-2.01)           |               | 0.44 (0.06-3.25)    |
| p-trend                                                                          |       |        | 0.042                                | 0.803               | 0.996               | 0.929               | 0.769               |               | 0.839                       | 0.458                      |               | 0.455               |
| <b>Diastolic Blood Pressure (mmHg) ESH classification</b>                        |       |        |                                      |                     |                     |                     |                     |               |                             |                            |               |                     |
| < 80                                                                             | 211   | 132590 | 1 (referent)                         | 1 (referent)        | 1 (referent)        | 1 (referent)        | 1 (referent)        |               | 1 (referent)                | 1 (referent)               |               | 1 (referent)        |
| 80-84                                                                            | 155   | 64872  | 1.14 (0.92-1.41)                     | 1.06 (0.85-1.30)    | 1.10 (0.88-1.38)    | 1.27 (0.93-1.73)    | 0.92 (0.68-1.24)    |               | 1.09 (0.77-1.53)            | 1.09 (0.83-1.42)           |               | 0.82 (0.53-1.27)    |
| 85-89                                                                            | 103   | 41500  | 1.11 (0.87-1.41)                     | 0.99 (0.78-1.26)    | 1.04 (0.81-1.34)    | 1.17 (0.83-1.65)    | 0.86 (0.60-1.22)    |               | 1.19 (0.80-1.77)            | 0.96 (0.71-1.30)           |               | 0.68 (0.39-1.18)    |
| 90-99                                                                            | 130   | 51196  | 1.03 (0.83-1.29)                     | 0.89 (0.70-1.11)    | 0.91 (0.71-1.16)    | 0.97 (0.70-1.35)    | 0.86 (0.62-1.19)    | 0.588         | 0.81 (0.52-1.24)            | 0.97 (0.74-1.28)           | 0.978         | 0.64 (0.38-1.07)    |
| 100-109                                                                          | 44    | 13896  | 1.27 (0.91-1.77)                     | 1.02 (0.73-1.42)    | 1.12 (0.79-1.59)    | 1.08 (0.69-1.69)    | 1.00 (0.59-1.71)    |               | 1.27 (0.65-2.46)            | 1.06 (0.72-1.57)           |               | 0.83 (0.39-1.79)    |
| >= 110                                                                           | 10    | 3264   | 1.27 (0.67-2.40)                     | 0.96 (0.51-1.83)    | 1.01 (0.51-1.98)    | 0.94 (0.41-2.17)    | 1.20 (0.44-3.26)    |               | 1.36 (0.33-5.55)            | 1.02 (0.50-2.10)           |               | 0.90 (0.22-3.75)    |
| p-trend                                                                          |       |        | 0.326                                | 0.435               | 0.756               | 0.686               | 0.535               |               | 0.972                       | 0.871                      |               | 0.139               |
| <b>Systolic Blood Pressure (mmHg) ASH classification</b>                         |       |        |                                      |                     |                     |                     |                     |               |                             |                            |               |                     |
| < 120                                                                            | 100   | 86141  | 1 (referent)                         | 1 (referent)        | 1 (referent)        | 1 (referent)        | 1 (referent)        |               | 1 (referent)                | 1 (referent)               |               | 1 (referent)        |
| 120-139                                                                          | 243   | 123928 | 1.08 (0.85-1.37)                     | 0.96 (0.75-1.22)    | 0.97 (0.76-1.25)    | 0.93 (0.64-1.34)    | 0.99 (0.72-1.37)    |               | 1.06 (0.75-1.52)            | 0.92 (0.66-1.27)           |               | 0.88 (0.58-1.33)    |
| 140-159                                                                          | 211   | 68235  | 1.23 (0.96-1.58)                     | 1.01 (0.78-1.31)    | 0.99 (0.75-1.29)    | 0.93 (0.64-1.37)    | 1.11 (0.79-1.58)    | 0.57          | 1.20 (0.81-1.78)            | 0.99 (0.71-1.38)           | 0.573         | 0.80 (0.48-1.34)    |
| >= 160                                                                           | 99    | 29014  | 1.18 (0.88-1.58)                     | 0.93 (0.69-1.26)    | 0.91 (0.66-1.25)    | 0.91 (0.59-1.40)    | 0.93 (0.61-1.43)    |               | 0.70 (0.39-1.26)            | 1.05 (0.72-1.52)           |               | 0.84 (0.41-1.76)    |
| p-trend                                                                          |       |        | 0.124                                | 0.855               | 0.62                | 0.753               | 0.951               |               | 0.678                       | 0.526                      |               | 0.455               |
| <b>Diastolic Blood Pressure (mmHg) ASH classification</b>                        |       |        |                                      |                     |                     |                     |                     |               |                             |                            |               |                     |
| < 80                                                                             | 211   | 132590 | 1 (referent)                         | 1 (referent)        | 1 (referent)        | 1 (referent)        | 1 (referent)        |               | 1 (referent)                | 1 (referent)               |               | 1 (referent)        |
| 80-89                                                                            | 258   | 106372 | 1.13 (0.94-1.36)                     | 1.03 (0.85-1.24)    | 1.08 (0.88-1.31)    | 1.23 (0.93-1.62)    | 0.89 (0.69-1.16)    |               | 1.12 (0.83-1.52)            | 1.03 (0.81-1.31)           |               | 0.76 (0.52-1.13)    |
| 90-99                                                                            | 130   | 51196  | 1.03 (0.83-1.29)                     | 0.89 (0.71-1.11)    | 0.91 (0.71-1.16)    | 0.98 (0.70-1.35)    | 0.86 (0.62-1.19)    | 0.543         | 0.81 (0.52-1.24)            | 0.98 (0.74-1.28)           | 0.889         | 0.64 (0.38-1.08)    |
| >= 100                                                                           | 54    | 17160  | 1.27 (0.94-1.72)                     | 1.01 (0.74-1.38)    | 1.10 (0.80-1.52)    | 1.06 (0.70-1.60)    | 1.04 (0.64-1.68)    |               | 1.28 (0.69-2.36)            | 1.06 (0.74-1.51)           |               | 0.85 (0.42-1.71)    |
| p-trend                                                                          |       |        | 0.257                                | 0.548               | 0.906               | 0.824               | 0.584               |               | 0.965                       | 0.96                       |               | 0.174               |
| <b>Mean BP (mmHg) (1/3SBP+2/3DBP) Cohort-specific quartiles</b>                  |       |        |                                      |                     |                     |                     |                     |               |                             |                            |               |                     |
| 50.0-88.3                                                                        | 84    | 76991  | 1 (referent)                         | 1 (referent)        | 1 (referent)        | 1 (referent)        | 1 (referent)        |               | 1 (referent)                | 1 (referent)               |               | 1 (referent)        |
| 88.5-96.6                                                                        | 149   | 77727  | 1.23 (0.94-1.61)                     | 1.13 (0.86-1.49)    | 1.26 (0.94-1.69)    | 1.29 (0.83-2.01)    | 1.09 (0.77-1.55)    |               | 1.18 (0.80-1.74)            | 1.14 (0.78-1.67)           |               | 1.43 (0.90-2.29)    |
| 96.8-105.5                                                                       | 185   | 76327  | 1.28 (0.99-1.67)                     | 1.11 (0.85-1.45)    | 1.17 (0.88-1.56)    | 1.28 (0.83-1.97)    | 1.04 (0.73-1.48)    | 0.379         | 1.15 (0.77-1.72)            | 1.15 (0.80-1.66)           | 0.848         | 0.79 (0.45-1.36)    |
| 105.6-216.6                                                                      | 235   | 76273  | 1.35 (1.04-1.74)                     | 1.09 (0.83-1.42)    | 1.14 (0.86-1.52)    | 1.23 (0.80-1.87)    | 1.04 (0.73-1.49)    |               | 1.19 (0.79-1.80)            | 1.15 (0.80-1.64)           |               | 0.94 (0.54-1.63)    |
| p-trend                                                                          |       |        | 0.034                                | 0.778               | 0.798               | 0.652               | 0.942               |               | 0.485                       | 0.59                       |               | 0.276               |
| <b>Hypertension (SBP &gt;= 140 mmHg, or DBP &gt;= 90 mmHg, or self-reported)</b> |       |        |                                      |                     |                     |                     |                     |               |                             |                            |               |                     |
| Normotensive                                                                     | 263   | 174179 | 1 (referent)                         | 1 (referent)        | 1 (referent)        | 1 (referent)        | 1 (referent)        |               | 1 (referent)                | 1 (referent)               |               | 1 (referent)        |
| Hypertensive                                                                     | 390   | 133139 | 1.23 (1.05-1.45)                     | 1.09 (0.92-1.29)    | 1.05 (0.88-1.26)    | 1.10 (0.87-1.39)    | 1.10 (0.86-1.39)    | 0.439         | 1.01 (0.77-1.33)            | 1.22 (0.99-1.51)           | 0.381         | 0.85 (0.59-1.22)    |

| Age > 53 yrs                                                                                                              | Age           | Never smokers                                                                                                             | Ever smokers                                                                                                              | Smoking       | Alcohol <= 12g                                                                                                            | Alcohol > 12g                                                                                                             | Alcohol       | No antihypertensive treatment                                                                                             | Antihypertensive treatment                                                                                                | Treatment     |  | Liver                                                                                                                      |
|---------------------------------------------------------------------------------------------------------------------------|---------------|---------------------------------------------------------------------------------------------------------------------------|---------------------------------------------------------------------------------------------------------------------------|---------------|---------------------------------------------------------------------------------------------------------------------------|---------------------------------------------------------------------------------------------------------------------------|---------------|---------------------------------------------------------------------------------------------------------------------------|---------------------------------------------------------------------------------------------------------------------------|---------------|--|----------------------------------------------------------------------------------------------------------------------------|
| HR (adjusted)                                                                                                             | p-interaction | HR (adjusted)                                                                                                             | HR (adjusted)                                                                                                             | p-interaction | HR (adjusted)                                                                                                             | HR (adjusted)                                                                                                             | p-interaction | HR (adjusted)                                                                                                             | HR (adjusted)                                                                                                             | p-interaction |  |                                                                                                                            |
| 510<br>154015                                                                                                             |               | 239<br>141931                                                                                                             | 409<br>160623                                                                                                             |               | 411<br>205214                                                                                                             | 242<br>102104                                                                                                             |               | 429<br>227336                                                                                                             | 129<br>37017                                                                                                              |               |  | Cases<br>Cohort size                                                                                                       |
| 1.014 (0.968-1.061)                                                                                                       | 0.927         | 1.037 (0.966-1.112)                                                                                                       | 0.994 (0.943-1.049)                                                                                                       | 0.596         | 0.989 (0.937-1.044)                                                                                                       | 1.042 (0.974-1.116)                                                                                                       | 0.13          | 1.016 (0.961-1.075)                                                                                                       | 0.952 (0.866-1.047)                                                                                                       | 0.298         |  | Mean Systolic Blood Pressure continuous (per 10mmHg increase)                                                              |
| 0.988 (0.906-1.077)                                                                                                       | 0.77          | 1.001 (0.879-1.142)                                                                                                       | 0.955 (0.867-1.052)                                                                                                       | 0.894         | 0.921 (0.834-1.018)                                                                                                       | 1.065 (0.943-1.204)                                                                                                       | 0.124         | 0.943 (0.850-1.045)                                                                                                       | 0.888 (0.740-1.064)                                                                                                       | 0.904         |  | Mean Diastolic Blood Pressure continuous (per 10mmHg increase)                                                             |
| 1.005 (0.934-1.081)                                                                                                       | 0.813         | 1.031 (0.923-1.151)                                                                                                       | 0.973 (0.896-1.057)                                                                                                       | 0.726         | 0.952 (0.875-1.037)                                                                                                       | 1.066 (0.960-1.184)                                                                                                       | 0.098         | 0.984 (0.901-1.075)                                                                                                       | 0.903 (0.773-1.055)                                                                                                       | 0.613         |  | Mean Blood Pressure (1/3SBP+2/3DBP) continuous (per 10mmHg increase)                                                       |
| 1 (referent)<br>0.87 (0.62-1.23)<br>1.10 (0.79-1.52)<br>1.08 (0.80-1.47)<br>0.94 (0.65-1.35)<br>1.11 (0.68-1.81)<br>0.552 | 0.659         | 1 (referent)<br>0.89 (0.56-1.41)<br>1.06 (0.68-1.65)<br>1.18 (0.77-1.79)<br>1.02 (0.60-1.75)<br>1.56 (0.77-3.17)<br>0.232 | 1 (referent)<br>0.89 (0.63-1.27)<br>1.05 (0.75-1.48)<br>0.95 (0.69-1.32)<br>0.89 (0.60-1.34)<br>0.81 (0.44-1.48)<br>0.618 | 0.846         | 1 (referent)<br>0.90 (0.65-1.24)<br>0.78 (0.56-1.09)<br>0.90 (0.66-1.23)<br>0.80 (0.54-1.19)<br>0.73 (0.39-1.38)<br>0.306 | 1 (referent)<br>0.80 (0.46-1.39)<br>1.78 (1.10-2.87)<br>1.38 (0.86-2.22)<br>1.20 (0.68-2.12)<br>1.78 (0.88-3.61)<br>0.07  | 0.029         | 1 (referent)<br>0.69 (0.50-0.95)<br>0.92 (0.68-1.24)<br>1.00 (0.75-1.34)<br>0.80 (0.53-1.23)<br>1.18 (0.63-2.22)<br>0.556 | 1 (referent)<br>1.29 (0.46-3.59)<br>1.06 (0.39-2.84)<br>0.79 (0.31-2.05)<br>0.79 (0.29-2.11)<br>0.83 (0.28-2.49)<br>0.165 | 0.189         |  | Systolic Blood Pressure (mmHg) ESH classification<br>< 120<br>120-129<br>130-139<br>140-159<br>160-179<br>≥ 180<br>p-trend |
| 1 (referent)<br>1.15 (0.90-1.46)<br>1.10 (0.84-1.44)<br>0.97 (0.75-1.25)<br>1.08 (0.74-1.57)<br>1.00 (0.49-2.05)<br>0.861 | 0.379         | 1 (referent)<br>1.25 (0.89-1.76)<br>0.97 (0.64-1.47)<br>0.96 (0.65-1.41)<br>1.06 (0.59-1.91)<br>1.67 (0.67-4.18)<br>0.955 | 1 (referent)<br>0.94 (0.72-1.24)<br>1.00 (0.74-1.34)<br>0.83 (0.63-1.11)<br>0.98 (0.65-1.47)<br>0.66 (0.27-1.62)<br>0.31  | 0.925         | 1 (referent)<br>1.04 (0.81-1.35)<br>0.88 (0.64-1.20)<br>0.73 (0.54-0.98)<br>1.01 (0.66-1.54)<br>0.80 (0.33-1.97)<br>0.092 | 1 (referent)<br>1.11 (0.76-1.62)<br>1.25 (0.84-1.86)<br>1.22 (0.84-1.77)<br>1.06 (0.61-1.84)<br>1.32 (0.52-3.33)<br>0.357 | 0.154         | 1 (referent)<br>0.93 (0.72-1.19)<br>0.94 (0.70-1.26)<br>0.88 (0.66-1.17)<br>0.85 (0.50-1.43)<br>0.51 (0.12-2.05)<br>0.258 | 1 (referent)<br>0.99 (0.55-1.79)<br>0.72 (0.38-1.37)<br>0.70 (0.40-1.23)<br>0.76 (0.39-1.48)<br>0.98 (0.38-2.51)<br>0.287 | 0.769         |  | Diastolic Blood Pressure (mmHg) ESH classification<br>< 80<br>80-84<br>85-89<br>90-99<br>100-109<br>≥ 110<br>p-trend       |
| 1 (referent)<br>0.99 (0.73-1.34)<br>1.08 (0.79-1.46)<br>0.97 (0.69-1.37)<br>0.916                                         | 0.802         | 1 (referent)<br>0.97 (0.66-1.44)<br>1.17 (0.77-1.78)<br>1.12 (0.68-1.85)<br>0.388                                         | 1 (referent)<br>0.97 (0.72-1.32)<br>0.95 (0.68-1.31)<br>0.87 (0.59-1.27)<br>0.452                                         | 0.789         | 1 (referent)<br>0.84 (0.63-1.12)<br>0.91 (0.67-1.23)<br>0.79 (0.55-1.15)<br>0.412                                         | 1 (referent)<br>1.29 (0.82-2.04)<br>1.34 (0.84-2.15)<br>1.29 (0.76-2.19)<br>0.445                                         | 0.184         | 1 (referent)<br>0.80 (0.61-1.04)<br>0.99 (0.74-1.32)<br>0.87 (0.59-1.27)<br>0.996                                         | 1 (referent)<br>1.14 (0.44-2.96)<br>0.80 (0.31-2.06)<br>0.80 (0.30-2.12)<br>0.174                                         | 0.298         |  | Systolic Blood Pressure (mmHg) ASH classification<br>< 120<br>120-139<br>140-159<br>≥ 160<br>p-trend                       |
| 1 (referent)<br>1.13 (0.91-1.40)<br>0.97 (0.75-1.25)<br>1.07 (0.75-1.51)<br>0.968                                         | 0.396         | 1 (referent)<br>1.14 (0.83-1.55)<br>0.96 (0.66-1.41)<br>1.18 (0.70-1.99)<br>0.821                                         | 1 (referent)<br>0.96 (0.76-1.22)<br>0.83 (0.62-1.11)<br>0.91 (0.62-1.35)<br>0.309                                         | 0.9           | 1 (referent)<br>0.98 (0.78-1.23)<br>0.73 (0.54-0.98)<br>0.97 (0.66-1.45)<br>0.18                                          | 1 (referent)<br>1.17 (0.84-1.63)<br>1.22 (0.84-1.77)<br>1.11 (0.67-1.84)<br>0.459                                         | 0.3           | 1 (referent)<br>0.93 (0.75-1.16)<br>0.88 (0.66-1.17)<br>0.79 (0.48-1.30)<br>0.247                                         | 1 (referent)<br>0.86 (0.50-1.47)<br>0.71 (0.40-1.24)<br>0.81 (0.43-1.51)<br>0.381                                         | 0.645         |  | Diastolic Blood Pressure (mmHg) ASH classification<br>< 80<br>80-89<br>90-99<br>≥ 100<br>p-trend                           |
| 1 (referent)<br>1.01 (0.72-1.41)<br>1.19 (0.87-1.62)<br>1.10 (0.81-1.51)<br>0.402                                         | 0.396         | 1 (referent)<br>1.04 (0.67-1.62)<br>1.14 (0.74-1.75)<br>1.14 (0.74-1.77)<br>0.486                                         | 1 (referent)<br>1.22 (0.86-1.73)<br>1.10 (0.78-1.55)<br>1.07 (0.76-1.51)<br>0.854                                         | 0.688         | 1 (referent)<br>1.04 (0.76-1.43)<br>0.94 (0.68-1.29)<br>0.91 (0.66-1.25)<br>0.374                                         | 1 (referent)<br>1.49 (0.87-2.57)<br>1.67 (0.99-2.81)<br>1.67 (0.99-2.81)<br>0.09                                          | 0.067         | 1 (referent)<br>1.18 (0.87-1.59)<br>1.05 (0.77-1.43)<br>1.09 (0.79-1.49)<br>0.936                                         | 1 (referent)<br>0.37 (0.15-0.95)<br>0.53 (0.25-1.14)<br>0.42 (0.20-0.87)<br>0.118                                         | 0.388         |  | Mean BP (mmHg) (1/3SBP+2/3DBP) Cohort-specific quartiles<br>50.0-88.3<br>88.5-96.6<br>96.8-105.5<br>105.6-216.6<br>p-trend |
| 1 (referent)<br>1.16 (0.96-1.41)                                                                                          | 0.301         | 1 (referent)<br>1.22 (0.92-1.61)                                                                                          | 1 (referent)<br>1.02 (0.82-1.25)                                                                                          | 0.996         | 1 (referent)<br>1.12 (0.91-1.39)                                                                                          | 1 (referent)<br>1.05 (0.80-1.38)                                                                                          | 0.792         | -<br>1 (referent)                                                                                                         | -<br>1.12 (0.88-1.42)                                                                                                     |               |  | Hypertension (SBP ≥ 140 mmHg, or DBP ≥ 90 mmHg, or self-reported)<br>Normotensive<br>Hypertensive                          |

| Hepatocellular                                                              |        | Excluding first 2 years of follow-up |                     |                     | Men                 | Women               | Sex                 | BMI ≤ 25 mg/m <sup>2</sup> | BMI > 25 mg/m <sup>2</sup> | BMI                 | Age ≤ 53 yrs  |                     |
|-----------------------------------------------------------------------------|--------|--------------------------------------|---------------------|---------------------|---------------------|---------------------|---------------------|----------------------------|----------------------------|---------------------|---------------|---------------------|
| Cases                                                                       | Cohort | HR (crude)                           | HR (adjusted)       | HR (adjusted)       | HR (adjusted)       | HR (adjusted)       | p-interaction       | HR (adjusted)              | HR (adjusted)              | p-interaction       | HR (adjusted) |                     |
| Cases                                                                       |        | 192                                  | 192                 | 172                 | 132                 | 60                  |                     | 55                         | 137                        |                     | 41            |                     |
| Cohort size                                                                 |        | 307318                               | 307318              | 301857              | 112591              | 194727              |                     | 146326                     | 160992                     |                     | 153303        |                     |
| <b>Mean Systolic Blood Pressure continuous (per 10mmHg increase)</b>        | 192    | 307318                               | 1.118 (1.041-1.201) | 1.053 (0.975-1.136) | 1.056 (0.974-1.145) | 1.054 (0.960-1.156) | 1.053 (0.921-1.204) | 0.687                      | 1.027 (0.890-1.186)        | 1.078 (0.986-1.178) | 0.867         | 0.922 (0.757-1.123) |
| <b>Mean Diastolic Blood Pressure continuous (per 10mmHg increase)</b>       | 192    | 307318                               | 1.069 (0.933-1.225) | 0.925 (0.801-1.068) | 0.942 (0.809-1.096) | 0.882 (0.740-1.051) | 1.017 (0.785-1.317) | 0.309                      | 0.997 (0.756-1.313)        | 0.963 (0.817-1.135) | 0.693         | 0.989 (0.721-1.357) |
| <b>Mean Blood Pressure (1/3SBP+2/3DBP) continuous (per 10mmHg increase)</b> | 192    | 307318                               | 1.130 (1.010-1.266) | 1.005 (0.890-1.135) | 1.016 (0.893-1.156) | 0.982 (0.847-1.138) | 1.053 (0.849-1.308) | 0.926                      | 1.021 (0.812-1.284)        | 1.043 (0.906-1.200) | 0.893         | 0.940 (0.709-1.245) |
| <b>Systolic Blood Pressure (mmHg) ESH classification</b>                    |        |                                      |                     |                     |                     |                     |                     |                            |                            |                     |               |                     |
| < 120                                                                       | 25     | 86141                                | 1 (referent)               | 1 (referent)               | 1 (referent)        | 1 (referent)  | 1 (referent)        |
| 120-129                                                                     | 29     | 66446                                | 1.02 (0.60-1.75)    | 0.81 (0.47-1.40)    | 0.75 (0.42-1.33)    | 0.83 (0.43-1.59)    | 0.69 (0.26-1.88)    |                            | 0.82 (0.31-2.16)           | 0.79 (0.41-1.52)    |               | 0.81 (0.33-2.02)    |
| 130-139                                                                     | 35     | 57482                                | 1.18 (0.70-1.98)    | 0.86 (0.51-1.46)    | 0.84 (0.48-1.46)    | 0.61 (0.31-1.20)    | 1.47 (0.63-3.43)    |                            | 1.39 (0.58-3.33)           | 0.63 (0.32-1.22)    |               | 0.62 (0.22-1.69)    |
| 140-159                                                                     | 70     | 68235                                | 1.55 (0.96-2.49)    | 1.03 (0.63-1.68)    | 0.96 (0.57-1.60)    | 0.95 (0.52-1.72)    | 1.18 (0.51-2.74)    | 0.888                      | 1.57 (0.68-3.60)           | 0.88 (0.49-1.59)    | 0.757         | 0.81 (0.32-2.07)    |
| 160-179                                                                     | 22     | 22656                                | 1.30 (0.71-2.36)    | 0.82 (0.45-1.52)    | 0.80 (0.42-1.51)    | 0.81 (0.39-1.67)    | 0.80 (0.25-2.52)    |                            | 0.21 (0.03-1.72)           | 0.97 (0.49-1.91)    |               | 0.50 (0.10-2.47)    |
| ≥ 180                                                                       | 11     | 6358                                 | 2.18 (1.04-4.57)    | 1.30 (0.61-2.75)    | 1.39 (0.64-2.99)    | 1.22 (0.50-2.99)    | 1.41 (0.35-5.67)    |                            | 1.34 (0.27-6.59)           | 1.28 (0.54-3.01)    |               | 0.92 (0.11-7.83)    |
| p-trend                                                                     |        |                                      | 0.019               | 0.592               | 0.569               | 0.713               | 0.644               |                            | 0.752                      | 0.446               |               | 0.52                |
| <b>Diastolic Blood Pressure (mmHg) ESH classification</b>                   |        |                                      |                     |                     |                     |                     |                     |                            |                            |                     |               |                     |
| < 80                                                                        | 64     | 132590                               | 1 (referent)        |                            | 1 (referent)               | 1 (referent)        |               | 1 (referent)        |
| 80-84                                                                       | 40     | 64872                                | 0.95 (0.63-1.41)    | 0.81 (0.54-1.21)    | 0.77 (0.50-1.19)    | 0.77 (0.48-1.26)    | 0.86 (0.42-1.77)    |                            | 1.08 (0.54-2.16)           | 0.75 (0.46-1.23)    |               | 0.34 (0.11-1.02)    |
| 85-89                                                                       | 35     | 41500                                | 1.21 (0.80-1.83)    | 0.96 (0.63-1.47)    | 1.00 (0.65-1.56)    | 0.84 (0.50-1.42)    | 1.23 (0.60-2.54)    |                            | 1.66 (0.80-3.46)           | 0.87 (0.52-1.46)    |               | 1.09 (0.45-2.62)    |
| 90-99                                                                       | 33     | 51196                                | 0.82 (0.53-1.25)    | 0.59 (0.38-0.91)    | 0.57 (0.36-0.92)    | 0.55 (0.32-0.92)    | 0.71 (0.32-1.57)    | 0.33                       | 0.41 (0.14-1.22)           | 0.71 (0.44-1.15)    | 0.852         | 0.72 (0.29-1.77)    |
| 100-109                                                                     | 15     | 13896                                | 1.36 (0.77-2.40)    | 0.87 (0.49-1.56)    | 0.95 (0.52-1.72)    | 0.80 (0.41-1.57)    | 0.99 (0.29-3.38)    |                            | 0.81 (0.19-3.55)           | 1.04 (0.55-1.97)    |               | 1.18 (0.37-3.75)    |
| ≥ 110                                                                       | 5      | 3264                                 | 2.07 (0.83-5.16)    | 1.21 (0.48-3.05)    | 1.34 (0.53-3.40)    | 0.84 (0.26-2.75)    | 3.07 (0.70-13.49)   |                            | 1.94 (0.25-14.93)          | 1.26 (0.45-3.55)    |               | no cases            |
| p-trend                                                                     |        |                                      | 0.523               | 0.199               | 0.357               | 0.121               | 0.925               |                            | 0.527                      | 0.741               |               | 0.847               |
| <b>Systolic Blood Pressure (mmHg) ASH classification</b>                    |        |                                      |                     |                     |                     |                     |                     |                            |                            |                     |               |                     |
| < 120                                                                       | 25     | 86141                                | 1 (referent)        |                            | 1 (referent)               | 1 (referent)        |               | 1 (referent)        |
| 120-139                                                                     | 64     | 123928                               | 1.10 (0.69-1.75)    | 0.84 (0.52-1.35)    | 0.79 (0.48-1.31)    | 0.71 (0.40-1.29)    | 1.08 (0.49-2.38)    |                            | 1.09 (0.49-2.44)           | 0.70 (0.39-1.26)    |               | 0.72 (0.32-1.64)    |
| 140-159                                                                     | 70     | 68235                                | 1.54 (0.96-2.48)    | 1.03 (0.63-1.67)    | 0.95 (0.57-1.59)    | 0.95 (0.53-1.73)    | 1.14 (0.49-2.66)    | 0.541                      | 1.54 (0.67-3.54)           | 0.89 (0.49-1.60)    | 0.843         | 0.82 (0.32-2.08)    |
| ≥ 160                                                                       | 33     | 29014                                | 1.49 (0.86-2.57)    | 0.93 (0.53-1.63)    | 0.93 (0.52-1.67)    | 0.91 (0.47-1.79)    | 0.92 (0.33-2.55)    |                            | 0.47 (0.12-1.84)           | 1.05 (0.55-1.99)    |               | 0.60 (0.15-2.38)    |
| p-trend                                                                     |        |                                      | 0.039               | 0.755               | 0.777               | 0.631               | 0.937               |                            | 0.832                      | 0.36                |               | 0.562               |
| <b>Diastolic Blood Pressure (mmHg) ASH classification</b>                   |        |                                      |                     |                     |                     |                     |                     |                            |                            |                     |               |                     |
| < 80                                                                        | 64     | 132590                               | 1 (referent)        |                            | 1 (referent)               | 1 (referent)        |               | 1 (referent)        |
| 80-89                                                                       | 75     | 106372                               | 1.05 (0.75-1.48)    | 0.87 (0.62-1.23)    | 0.87 (0.60-1.25)    | 0.80 (0.53-1.22)    | 1.01 (0.56-1.84)    |                            | 1.29 (0.71-2.32)           | 0.80 (0.53-1.22)    |               | 0.62 (0.29-1.35)    |
| 90-99                                                                       | 33     | 51196                                | 0.82 (0.53-1.25)    | 0.59 (0.38-0.91)    | 0.57 (0.36-0.91)    | 0.55 (0.32-0.92)    | 0.70 (0.32-1.56)    | 0.441                      | 0.41 (0.14-1.21)           | 0.71 (0.44-1.15)    | 0.753         | 0.71 (0.29-1.75)    |
| ≥ 100                                                                       | 20     | 17160                                | 1.48 (0.89-2.47)    | 0.93 (0.55-1.58)    | 1.02 (0.60-1.74)    | 0.81 (0.44-1.50)    | 1.34 (0.49-3.67)    |                            | 1.00 (0.29-3.44)           | 1.08 (0.61-1.93)    |               | 0.90 (0.28-2.87)    |
| p-trend                                                                     |        |                                      | 0.659               | 0.144               | 0.245               | 0.111               | 0.863               |                            | 0.382                      | 0.674               |               | 0.611               |
| <b>Mean BP (mmHg) (1/3SBP+2/3DBP) Cohort-specific quartiles</b>             |        |                                      |                     |                     |                     |                     |                     |                            |                            |                     |               |                     |
| 50.0-88.3                                                                   | 25     | 76991                                | 1 (referent)        |                            | 1 (referent)               | 1 (referent)        |               | 1 (referent)        |
| 88.5-96.6                                                                   | 38     | 77727                                | 1.00 (0.60-1.67)    | 0.84 (0.50-1.40)    | 0.77 (0.45-1.32)    | 0.89 (0.48-1.66)    | 0.65 (0.26-1.67)    |                            | 1.25 (0.52-3.01)           | 0.64 (0.34-1.20)    |               | 1.25 (0.49-3.20)    |
| 96.8-105.5                                                                  | 55     | 76327                                | 1.21 (0.75-1.95)    | 0.89 (0.54-1.45)    | 0.83 (0.49-1.38)    | 0.68 (0.37-1.27)    | 1.31 (0.59-2.92)    | 0.413                      | 1.38 (0.58-3.29)           | 0.72 (0.40-1.30)    | 0.362         | 0.65 (0.29-1.89)    |
| 105.6-216.6                                                                 | 74     | 76273                                | 1.31 (0.82-2.10)    | 0.84 (0.51-1.36)    | 0.79 (0.47-1.31)    | 0.77 (0.42-1.39)    | 0.95 (0.41-2.21)    |                            | 1.30 (0.54-3.16)           | 0.74 (0.42-1.31)    |               | 0.91 (0.32-2.56)    |
| p-trend                                                                     |        |                                      | 0.141               | 0.615               | 0.554               | 0.357               | 0.673               |                            | 0.574                      | 0.7                 |               | 0.524               |
| <b>Hypertension (SBP ≥ 140 mmHg, or DBP ≥ 90 mmHg, or self-reported)</b>    |        |                                      |                     |                     |                     |                     |                     |                            |                            |                     |               |                     |
| Normotensive                                                                | 67     | 174179                               | 1 (referent)        |                            | 1 (referent)               | 1 (referent)        |               | 1 (referent)        |
| Hypertensive                                                                | 124    | 133139                               | 1.50 (1.10-2.05)    | 1.18 (0.86-1.63)    | 1.22 (0.87-1.71)    | 1.25 (0.85-1.85)    | 1.07 (0.62-1.85)    | 0.498                      | 1.11 (0.63-1.93)           | 1.36 (0.93-2.00)    | 0.875         | 0.87 (0.45-1.69)    |



| Gallbladder and bile ducts                                                       |        | Excluding first 2 years of follow-up |                     |                     | Men                 | Women               | Sex                 | BMI <= 25 mg/m <sup>2</sup> | BMI > 25 mg/m <sup>2</sup> | BMI                 | Age <= 53 yrs |                     |
|----------------------------------------------------------------------------------|--------|--------------------------------------|---------------------|---------------------|---------------------|---------------------|---------------------|-----------------------------|----------------------------|---------------------|---------------|---------------------|
| Cases                                                                            | Cohort | HR (crude)                           | HR (adjusted)       | HR (adjusted)       | HR (adjusted)       | HR (adjusted)       | p-interaction       | HR (adjusted)               | HR (adjusted)              | p-interaction       | HR (adjusted) |                     |
| Cases                                                                            |        | 346                                  | 346                 | 315                 | 137                 | 209                 |                     | 136                         | 210                        |                     | 80            |                     |
| Cohort size                                                                      |        | 307318                               | 307318              | 301857              | 112591              | 194727              |                     | 146326                      | 160992                     |                     | 153303        |                     |
| <b>Mean Systolic Blood Pressure continuous (per 10mmHg increase)</b>             | 346    | 307318                               | 1.001 (0.946-1.059) | 0.989 (0.933-1.049) | 0.975 (0.916-1.037) | 0.991 (0.901-1.091) | 0.991 (0.920-1.067) | 0.847                       | 0.956 (0.868-1.053)        | 1.021 (0.949-1.099) | 0.367         | 0.961 (0.833-1.108) |
| <b>Mean Diastolic Blood Pressure continuous (per 10mmHg increase)</b>            | 346    | 307318                               | 1.024 (0.925-1.134) | 1.008 (0.906-1.121) | 1.001 (0.895-1.120) | 1.065 (0.907-1.251) | 0.979 (0.851-1.126) | 0.436                       | 0.960 (0.806-1.143)        | 1.060 (0.930-1.209) | 0.419         | 0.817 (0.644-1.037) |
| <b>Mean Blood Pressure (1/3SBP+2/3DBP) continuous (per 10mmHg increase)</b>      | 346    | 307318                               | 1.012 (0.928-1.104) | 0.995 (0.909-1.089) | 0.981 (0.891-1.079) | 1.026 (0.890-1.183) | 0.983 (0.874-1.105) | 0.582                       | 0.947 (0.816-1.098)        | 1.046 (0.935-1.171) | 0.354         | 0.875 (0.709-1.080) |
| <b>Systolic Blood Pressure (mmHg) ESH classification</b>                         |        |                                      |                     |                     |                     |                     |                     |                             |                            |                     |               |                     |
| < 120                                                                            | 56     | 86141                                | 1 (referent)        | 1 (referent)        | 1 (referent)        | 1 (referent)        |                     |                             | 1 (referent)               | 1 (referent)        |               | 1 (referent)        |
| 120-129                                                                          | 58     | 66446                                | 0.98 (0.67-1.41)    | 0.96 (0.66-1.39)    | 0.97 (0.66-1.43)    | 1.14 (0.57-2.29)    | 0.93 (0.59-1.45)    |                             | 0.79 (0.47-1.34)           | 1.24 (0.71-2.17)    |               | 1.02 (0.56-1.84)    |
| 130-139                                                                          | 83     | 57482                                | 1.35 (0.95-1.91)    | 1.30 (0.91-1.85)    | 1.26 (0.87-1.82)    | 1.89 (0.99-3.57)    | 1.06 (0.68-1.66)    |                             | 1.22 (0.75-2.00)           | 1.56 (0.92-2.65)    |               | 1.13 (0.61-2.12)    |
| 140-159                                                                          | 105    | 68235                                | 1.15 (0.82-1.62)    | 1.10 (0.77-1.56)    | 1.02 (0.71-1.48)    | 1.26 (0.66-2.41)    | 1.10 (0.72-1.69)    | 0.919                       | 0.99 (0.59-1.63)           | 1.38 (0.82-2.32)    | 0.406         | 0.68 (0.32-1.44)    |
| 160-179                                                                          | 33     | 22656                                | 0.93 (0.60-1.47)    | 0.88 (0.56-1.39)    | 0.81 (0.50-1.32)    | 0.83 (0.36-1.93)    | 0.97 (0.56-1.68)    |                             | 0.65 (0.29-1.44)           | 1.19 (0.64-2.20)    |               | 0.72 (0.21-2.46)    |
| >= 180                                                                           | 11     | 6358                                 | 1.07 (0.55-2.08)    | 0.99 (0.51-1.94)    | 0.95 (0.47-1.92)    | 1.58 (0.58-4.32)    | 0.74 (0.29-1.93)    |                             | 0.31 (0.04-2.32)           | 1.58 (0.72-3.48)    |               | no cases            |
| p-trend                                                                          |        |                                      | 0.71                | 0.995               | 0.652               | 0.989               | 0.943               |                             | 0.528                      | 0.425               |               | 0.279               |
| <b>Diastolic Blood Pressure (mmHg) ESH classification</b>                        |        |                                      |                     |                     |                     |                     |                     |                             |                            |                     |               |                     |
| < 80                                                                             | 119    | 132590                               | 1 (referent)        |                             | 1 (referent)               | 1 (referent)        |               | 1 (referent)        |
| 80-84                                                                            | 79     | 64872                                | 1.07 (0.80-1.43)    | 1.05 (0.79-1.41)    | 1.08 (0.80-1.46)    | 1.67 (1.01-2.75)    | 0.84 (0.58-1.22)    |                             | 0.89 (0.56-1.40)           | 1.20 (0.82-1.77)    |               | 0.95 (0.55-1.63)    |
| 85-89                                                                            | 53     | 41500                                | 1.04 (0.75-1.44)    | 1.01 (0.73-1.41)    | 0.98 (0.69-1.39)    | 1.57 (0.91-2.70)    | 0.82 (0.53-1.26)    |                             | 1.04 (0.62-1.75)           | 1.06 (0.69-1.64)    |               | 0.49 (0.21-1.11)    |
| 90-99                                                                            | 72     | 51196                                | 1.06 (0.78-1.43)    | 1.02 (0.75-1.39)    | 1.01 (0.73-1.40)    | 1.43 (0.85-2.41)    | 0.92 (0.62-1.36)    | 0.275                       | 0.83 (0.48-1.42)           | 1.19 (0.81-1.76)    | 0.632         | 0.45 (0.20-0.99)    |
| 100-109                                                                          | 18     | 13896                                | 0.96 (0.58-1.58)    | 0.91 (0.55-1.51)    | 0.89 (0.52-1.52)    | 1.32 (0.63-2.77)    | 0.76 (0.36-1.58)    |                             | 1.03 (0.41-2.60)           | 0.97 (0.53-1.80)    |               | 0.20 (0.03-1.49)    |
| >= 110                                                                           | 5      | 3264                                 | 1.15 (0.47-2.81)    | 1.07 (0.43-2.65)    | 0.96 (0.35-2.62)    | 1.60 (0.48-5.34)    | 0.93 (0.23-3.80)    |                             | 1.14 (0.16-8.26)           | 1.25 (0.45-3.48)    |               | 1.79 (0.42-7.71)    |
| p-trend                                                                          |        |                                      | 0.835               | 0.933               | 0.749               | 0.357               | 0.462               |                             | 0.749                      | 0.671               |               | 0.023               |
| <b>Systolic Blood Pressure (mmHg) ASH classification</b>                         |        |                                      |                     |                     |                     |                     |                     |                             |                            |                     |               |                     |
| < 120                                                                            | 56     | 86141                                | 1 (referent)        |                             | 1 (referent)               | 1 (referent)        |               | 1 (referent)        |
| 120-139                                                                          | 141    | 123928                               | 1.16 (0.84-1.59)    | 1.12 (0.81-1.55)    | 1.11 (0.80-1.55)    | 1.52 (0.83-2.80)    | 0.99 (0.67-1.46)    |                             | 0.99 (0.64-1.52)           | 1.41 (0.86-2.31)    |               | 1.07 (0.63-1.80)    |
| 140-159                                                                          | 105    | 68235                                | 1.14 (0.81-1.61)    | 1.08 (0.76-1.54)    | 1.01 (0.70-1.46)    | 1.23 (0.64-2.36)    | 1.10 (0.72-1.68)    | 0.683                       | 0.97 (0.59-1.61)           | 1.37 (0.81-2.30)    | 0.343         | 0.67 (0.32-1.43)    |
| >= 160                                                                           | 44     | 29014                                | 0.95 (0.63-1.45)    | 0.89 (0.58-1.37)    | 0.83 (0.53-1.31)    | 0.97 (0.45-2.08)    | 0.91 (0.54-1.54)    |                             | 0.57 (0.26-1.23)           | 1.27 (0.71-2.27)    |               | 0.58 (0.17-2.00)    |
| p-trend                                                                          |        |                                      | 0.832               | 0.559               | 0.33                | 0.438               | 0.962               |                             | 0.278                      | 0.695               |               | 0.244               |
| <b>Diastolic Blood Pressure (mmHg) ASH classification</b>                        |        |                                      |                     |                     |                     |                     |                     |                             |                            |                     |               |                     |
| < 80                                                                             | 119    | 132590                               | 1 (referent)        |                             | 1 (referent)               | 1 (referent)        |               | 1 (referent)        |
| 80-89                                                                            | 132    | 106372                               | 1.06 (0.82-1.36)    | 1.04 (0.80-1.34)    | 1.04 (0.79-1.35)    | 1.63 (1.03-2.56)    | 0.83 (0.60-1.15)    |                             | 0.95 (0.64-1.39)           | 1.14 (0.81-1.62)    |               | 0.77 (0.46-1.27)    |
| 90-99                                                                            | 72     | 51196                                | 1.06 (0.78-1.43)    | 1.03 (0.75-1.39)    | 1.01 (0.73-1.40)    | 1.43 (0.85-2.41)    | 0.92 (0.62-1.36)    | 0.238                       | 0.83 (0.48-1.42)           | 1.20 (0.81-1.76)    | 0.543         | 0.45 (0.20-0.99)    |
| >= 100                                                                           | 23     | 17160                                | 0.99 (0.63-1.56)    | 0.94 (0.59-1.49)    | 0.90 (0.55-1.47)    | 1.38 (0.70-2.72)    | 0.79 (0.40-1.53)    |                             | 1.05 (0.45-2.46)           | 1.03 (0.59-1.80)    |               | 0.50 (0.15-1.66)    |
| p-trend                                                                          |        |                                      | 0.833               | 0.941               | 0.821               | 0.323               | 0.432               |                             | 0.664                      | 0.614               |               | 0.037               |
| <b>Mean BP (mmHg) (1/3SBP+2/3DBP) Cohort-specific quartiles</b>                  |        |                                      |                     |                     |                     |                     |                     |                             |                            |                     |               |                     |
| 50.0-88.3                                                                        | 47     | 76991                                | 1 (referent)        |                             | 1 (referent)               | 1 (referent)        |               | 1 (referent)        |
| 88.5-96.6                                                                        | 85     | 77727                                | 1.31 (0.92-1.88)    | 1.30 (0.90-1.86)    | 1.44 (0.98-2.11)    | 1.84 (0.83-4.07)    | 1.24 (0.82-1.88)    |                             | 1.18 (0.73-1.89)           | 1.63 (0.91-2.95)    |               | 1.47 (0.82-2.61)    |
| 96.8-105.5                                                                       | 93     | 76327                                | 1.21 (0.85-1.74)    | 1.18 (0.82-1.70)    | 1.22 (0.83-1.80)    | 2.34 (1.09-5.03)    | 0.88 (0.56-1.38)    | 0.158                       | 0.90 (0.54-1.51)           | 1.66 (0.94-2.95)    | 0.342         | 0.77 (0.38-1.56)    |
| 105.6-216.6                                                                      | 121    | 76273                                | 1.31 (0.92-1.86)    | 1.25 (0.87-1.81)    | 1.24 (0.84-1.83)    | 2.10 (0.98-4.53)    | 1.10 (0.71-1.69)    |                             | 1.05 (0.63-1.77)           | 1.72 (0.97-3.02)    |               | 0.75 (0.35-1.60)    |
| p-trend                                                                          |        |                                      | 0.267               | 0.432               | 0.706               | 0.103               | 0.91                |                             | 0.869                      | 0.145               |               | 0.185               |
| <b>Hypertension (SBP &gt;= 140 mmHg, or DBP &gt;= 90 mmHg, or self-reported)</b> |        |                                      |                     |                     |                     |                     |                     |                             |                            |                     |               |                     |
| Normotensive                                                                     | 150    | 174179                               | 1 (referent)        |                             | 1 (referent)               | 1 (referent)        |               | 1 (referent)        |
| Hypertensive                                                                     | 196    | 133139                               | 1.11 (0.89-1.39)    | 1.07 (0.85-1.35)    | 1.01 (0.80-1.28)    | 1.21 (0.84-1.74)    | 1.01 (0.76-1.36)    | 0.391                       | 0.81 (0.56-1.16)           | 1.36 (1.00-1.84)    | 0.053         | 0.68 (0.41-1.12)    |



| Pancreas                                                                         |        | Excluding first 2 years of follow-up |                     |                     | Men                 | Women               | Sex                 | BMI <= 25 mg/m <sup>2</sup> | BMI > 25 mg/m <sup>2</sup> | BMI                 | Age <= 53 yrs |                     |
|----------------------------------------------------------------------------------|--------|--------------------------------------|---------------------|---------------------|---------------------|---------------------|---------------------|-----------------------------|----------------------------|---------------------|---------------|---------------------|
| Cases                                                                            | Cohort | HR (crude)                           | HR (adjusted)       | HR (adjusted)       | HR (adjusted)       | HR (adjusted)       | p-interaction       | HR (adjusted)               | HR (adjusted)              | p-interaction       | HR (adjusted) |                     |
| Cases                                                                            |        | 990                                  | 990                 | 921                 | 452                 | 538                 |                     | 428                         | 562                        |                     | 240           |                     |
| Cohort size                                                                      |        | 307318                               | 307318              | 301857              | 112591              | 194727              |                     | 146326                      | 160992                     |                     | 153303        |                     |
| <b>Mean Systolic Blood Pressure continuous (per 10mmHg increase)</b>             | 990    | 307318                               | 1.025 (0.992-1.060) | 1.013 (0.979-1.049) | 1.012 (0.976-1.049) | 1.012 (0.960-1.067) | 1.010 (0.965-1.057) | 0.797                       | 1.068 (1.015-1.124)        | 0.980 (0.937-1.026) | 0.01          | 0.990 (0.913-1.073) |
| <b>Mean Diastolic Blood Pressure continuous (per 10mmHg increase)</b>            | 990    | 307318                               | 1.035 (0.975-1.099) | 1.014 (0.952-1.080) | 1.012 (0.949-1.080) | 1.014 (0.924-1.113) | 1.007 (0.924-1.097) | 0.93                        | 1.079 (0.981-1.187)        | 0.984 (0.907-1.069) | 0.149         | 0.942 (0.825-1.076) |
| <b>Mean Blood Pressure (1/3SBP+2/3DBP) continuous (per 10mmHg increase)</b>      | 990    | 307318                               | 1.037 (0.985-1.091) | 1.017 (0.965-1.073) | 1.015 (0.961-1.073) | 1.016 (0.938-1.101) | 1.011 (0.941-1.087) | 0.849                       | 1.092 (1.009-1.183)        | 0.977 (0.911-1.048) | 0.032         | 0.962 (0.856-1.082) |
| <b>Systolic Blood Pressure (mmHg) ESH classification</b>                         |        |                                      |                     |                     |                     |                     |                     |                             |                            |                     |               |                     |
| < 120                                                                            | 176    | 86141                                | 1 (referent)        |                             | 1 (referent)               | 1 (referent)        |               | 1 (referent)        |
| 120-129                                                                          | 184    | 66446                                | 1.01 (0.82-1.24)    | 0.98 (0.79-1.21)    | 0.98 (0.79-1.22)    | 0.88 (0.63-1.24)    | 1.02 (0.78-1.34)    |                             | 1.06 (0.78-1.43)           | 0.87 (0.65-1.17)    |               | 1.14 (0.81-1.61)    |
| 130-139                                                                          | 182    | 57482                                | 0.97 (0.79-1.20)    | 0.93 (0.75-1.15)    | 0.97 (0.78-1.21)    | 0.91 (0.66-1.27)    | 0.89 (0.67-1.18)    |                             | 1.25 (0.93-1.70)           | 0.70 (0.52-0.94)    |               | 1.04 (0.71-1.52)    |
| 140-159                                                                          | 289    | 68235                                | 1.06 (0.87-1.29)    | 1.00 (0.82-1.22)    | 1.01 (0.82-1.24)    | 0.89 (0.65-1.22)    | 1.06 (0.81-1.38)    | 0.649                       | 1.23 (0.92-1.66)           | 0.81 (0.62-1.07)    | 0.008         | 0.73 (0.48-1.13)    |
| 160-179                                                                          | 129    | 22656                                | 1.28 (1.01-1.63)    | 1.20 (0.94-1.53)    | 1.24 (0.96-1.59)    | 1.19 (0.82-1.73)    | 1.14 (0.82-1.58)    |                             | 1.62 (1.11-2.37)           | 0.95 (0.69-1.31)    |               | 1.07 (0.58-2.00)    |
| >= 180                                                                           | 30     | 6358                                 | 1.03 (0.69-1.53)    | 0.95 (0.63-1.41)    | 0.94 (0.61-1.43)    | 0.87 (0.48-1.58)    | 0.97 (0.57-1.68)    |                             | 1.61 (0.87-2.99)           | 0.66 (0.39-1.12)    |               | 1.80 (0.71-4.57)    |
| p-trend                                                                          |        |                                      | 0.115               | 0.383               | 0.334               | 0.636               | 0.574               |                             | 0.009                      | 0.397               |               | 0.57                |
| <b>Diastolic Blood Pressure (mmHg) ESH classification</b>                        |        |                                      |                     |                     |                     |                     |                     |                             |                            |                     |               |                     |
| < 80                                                                             | 346    | 132590                               | 1 (referent)        |                             | 1 (referent)               | 1 (referent)        |               | 1 (referent)        |
| 80-84                                                                            | 224    | 64872                                | 1.09 (0.92-1.29)    | 1.07 (0.90-1.27)    | 1.09 (0.91-1.30)    | 1.12 (0.85-1.46)    | 1.03 (0.82-1.29)    |                             | 1.07 (0.83-1.38)           | 1.07 (0.85-1.36)    |               | 1.08 (0.77-1.49)    |
| 85-89                                                                            | 132    | 41500                                | 0.93 (0.76-1.13)    | 0.90 (0.73-1.11)    | 0.89 (0.72-1.10)    | 1.03 (0.77-1.38)    | 0.78 (0.58-1.04)    |                             | 1.00 (0.73-1.36)           | 0.85 (0.65-1.12)    |               | 0.68 (0.43-1.06)    |
| 90-99                                                                            | 213    | 51196                                | 1.15 (0.97-1.37)    | 1.10 (0.92-1.32)    | 1.11 (0.92-1.34)    | 1.16 (0.89-1.51)    | 1.05 (0.82-1.34)    | 0.882                       | 1.18 (0.89-1.56)           | 1.07 (0.85-1.36)    | 0.269         | 0.88 (0.59-1.30)    |
| 100-109                                                                          | 63     | 13896                                | 1.22 (0.93-1.60)    | 1.15 (0.87-1.52)    | 1.11 (0.83-1.49)    | 1.01 (0.67-1.52)    | 1.35 (0.92-1.97)    |                             | 1.17 (0.71-1.94)           | 1.16 (0.83-1.62)    |               | 0.78 (0.39-1.57)    |
| >= 110                                                                           | 12     | 3264                                 | 1.05 (0.59-1.87)    | 0.97 (0.54-1.73)    | 0.97 (0.53-1.78)    | 1.06 (0.52-2.19)    | 0.84 (0.31-2.28)    |                             | 2.42 (1.07-5.49)           | 0.62 (0.27-1.40)    |               | 1.84 (0.73-4.59)    |
| p-trend                                                                          |        |                                      | 0.156               | 0.433               | 0.517               | 0.578               | 0.669               |                             | 0.134                      | 0.902               |               | 0.434               |
| <b>Systolic Blood Pressure (mmHg) ASH classification</b>                         |        |                                      |                     |                     |                     |                     |                     |                             |                            |                     |               |                     |
| < 120                                                                            | 176    | 86141                                | 1 (referent)        |                             | 1 (referent)               | 1 (referent)        |               | 1 (referent)        |
| 120-139                                                                          | 366    | 123928                               | 0.99 (0.83-1.19)    | 0.95 (0.79-1.15)    | 0.98 (0.81-1.19)    | 0.90 (0.67-1.21)    | 0.96 (0.75-1.22)    |                             | 1.15 (0.88-1.49)           | 0.78 (0.60-1.01)    |               | 1.10 (0.80-1.50)    |
| 140-159                                                                          | 289    | 68235                                | 1.06 (0.87-1.29)    | 1.00 (0.82-1.23)    | 1.01 (0.82-1.25)    | 0.89 (0.65-1.22)    | 1.06 (0.82-1.38)    | 0.628                       | 1.23 (0.91-1.65)           | 0.82 (0.62-1.08)    | 0.03          | 0.74 (0.48-1.13)    |
| >= 160                                                                           | 159    | 29014                                | 1.23 (0.98-1.54)    | 1.15 (0.91-1.45)    | 1.17 (0.92-1.49)    | 1.12 (0.78-1.60)    | 1.11 (0.81-1.52)    |                             | 1.61 (1.13-2.30)           | 0.89 (0.65-1.21)    |               | 1.21 (0.70-2.11)    |
| p-trend                                                                          |        |                                      | 0.055               | 0.205               | 0.197               | 0.482               | 0.368               |                             | 0.013                      | 0.835               |               | 0.667               |
| <b>Diastolic Blood Pressure (mmHg) ASH classification</b>                        |        |                                      |                     |                     |                     |                     |                     |                             |                            |                     |               |                     |
| < 80                                                                             | 346    | 132590                               | 1 (referent)        |                             | 1 (referent)               | 1 (referent)        |               | 1 (referent)        |
| 80-89                                                                            | 356    | 106372                               | 1.02 (0.88-1.19)    | 1.00 (0.86-1.16)    | 1.01 (0.86-1.18)    | 1.08 (0.85-1.37)    | 0.93 (0.76-1.14)    |                             | 1.04 (0.83-1.30)           | 0.98 (0.79-1.21)    |               | 0.92 (0.68-1.24)    |
| 90-99                                                                            | 213    | 51196                                | 1.15 (0.97-1.37)    | 1.10 (0.92-1.32)    | 1.12 (0.93-1.34)    | 1.16 (0.89-1.51)    | 1.05 (0.82-1.34)    | 0.646                       | 1.18 (0.89-1.56)           | 1.08 (0.85-1.36)    | 0.419         | 0.88 (0.59-1.31)    |
| >= 100                                                                           | 75     | 17160                                | 1.19 (0.92-1.53)    | 1.12 (0.86-1.45)    | 1.09 (0.83-1.43)    | 1.02 (0.70-1.49)    | 1.27 (0.88-1.82)    |                             | 1.35 (0.87-2.10)           | 1.05 (0.76-1.45)    |               | 0.99 (0.55-1.77)    |
| p-trend                                                                          |        |                                      | 0.068               | 0.23                | 0.277               | 0.518               | 0.349               |                             | 0.128                      | 0.536               |               | 0.649               |
| <b>Mean BP (mmHg) (1/3SBP+2/3DBP) Cohort-specific quartiles</b>                  |        |                                      |                     |                     |                     |                     |                     |                             |                            |                     |               |                     |
| 50.0-88.3                                                                        | 156    | 76991                                | 1 (referent)        |                             | 1 (referent)               | 1 (referent)        |               | 1 (referent)        |
| 88.5-96.6                                                                        | 223    | 77727                                | 1.08 (0.87-1.32)    | 1.05 (0.85-1.29)    | 1.11 (0.90-1.38)    | 1.12 (0.79-1.59)    | 1.00 (0.77-1.30)    |                             | 1.17 (0.87-1.55)           | 0.91 (0.67-1.23)    |               | 1.43 (1.01-2.03)    |
| 96.8-105.5                                                                       | 267    | 76327                                | 1.09 (0.89-1.34)    | 1.06 (0.86-1.30)    | 1.09 (0.88-1.35)    | 1.11 (0.79-1.57)    | 1.00 (0.77-1.30)    | 0.919                       | 1.39 (1.05-1.85)           | 0.80 (0.60-1.07)    | 0.036         | 0.91 (0.61-1.36)    |
| 105.6-216.6                                                                      | 344    | 76273                                | 1.20 (0.98-1.46)    | 1.13 (0.92-1.39)    | 1.14 (0.92-1.41)    | 1.17 (0.83-1.65)    | 1.09 (0.84-1.41)    |                             | 1.39 (1.03-1.86)           | 0.93 (0.70-1.23)    |               | 1.04 (0.68-1.59)    |
| p-trend                                                                          |        |                                      | 0.064               | 0.243               | 0.322               | 0.413               | 0.518               |                             | 0.016                      | 0.748               |               | 0.52                |
| <b>Hypertension (SBP &gt;= 140 mmHg, or DBP &gt;= 90 mmHg, or self-reported)</b> |        |                                      |                     |                     |                     |                     |                     |                             |                            |                     |               |                     |
| Normotensive                                                                     | 437    | 174179                               | 1 (referent)        |                             | 1 (referent)               | 1 (referent)        |               | 1 (referent)        |
| Hypertensive                                                                     | 553    | 133139                               | 1.14 (1.00-1.30)    | 1.11 (0.97-1.27)    | 1.11 (0.97-1.28)    | 1.13 (0.92-1.38)    | 1.08 (0.90-1.30)    | 0.973                       | 1.23 (1.01-1.50)           | 1.04 (0.87-1.24)    | 0.164         | 0.88 (0.66-1.16)    |



| Age > 53 yrs                                                                                                              | Age           | Never smokers                                                                                                             | Ever smokers                                                                                                              | Smoking       | Alcohol <= 12g                                                                                                            | Alcohol > 12g                                                                                                             | Alcohol       | No antihypertensive treatment                                                                                             | Antihypertensive treatment                                                                                                | Treatment     |  | Pancreas                                                                                                                    |
|---------------------------------------------------------------------------------------------------------------------------|---------------|---------------------------------------------------------------------------------------------------------------------------|---------------------------------------------------------------------------------------------------------------------------|---------------|---------------------------------------------------------------------------------------------------------------------------|---------------------------------------------------------------------------------------------------------------------------|---------------|---------------------------------------------------------------------------------------------------------------------------|---------------------------------------------------------------------------------------------------------------------------|---------------|--|-----------------------------------------------------------------------------------------------------------------------------|
| HR (adjusted)                                                                                                             | p-interaction | HR (adjusted)                                                                                                             | HR (adjusted)                                                                                                             | p-interaction | HR (adjusted)                                                                                                             | HR (adjusted)                                                                                                             | p-interaction | HR (adjusted)                                                                                                             | HR (adjusted)                                                                                                             | p-interaction |  |                                                                                                                             |
| 750<br>154015                                                                                                             |               | 365<br>141931                                                                                                             | 612<br>160623                                                                                                             |               | 599<br>205214                                                                                                             | 391<br>102104                                                                                                             |               | 682<br>227336                                                                                                             | 152<br>37017                                                                                                              |               |  | Cases<br>Cohort size                                                                                                        |
| 1.017 (0.979-1.056)                                                                                                       | 0.738         | 1.018 (0.962-1.078)                                                                                                       | 1.004 (0.961-1.049)                                                                                                       | 0.818         | 1.002 (0.958-1.048)                                                                                                       | 1.030 (0.977-1.087)                                                                                                       | 0.175         | 1.002 (0.958-1.047)                                                                                                       | 0.994 (0.912-1.084)                                                                                                       | 0.401         |  | Mean Systolic Blood Pressure continuous (per 10mmHg increase)                                                               |
| 1.034 (0.963-1.111)                                                                                                       | 0.371         | 1.068 (0.964-1.184)                                                                                                       | 0.965 (0.890-1.046)                                                                                                       | 0.464         | 1.014 (0.935-1.099)                                                                                                       | 1.019 (0.922-1.126)                                                                                                       | 0.697         | 1.005 (0.928-1.089)                                                                                                       | 0.925 (0.784-1.091)                                                                                                       | 0.233         |  | Mean Diastolic Blood Pressure continuous (per 10mmHg increase)                                                              |
| 1.030 (0.971-1.094)                                                                                                       | 0.487         | 1.048 (0.959-1.144)                                                                                                       | 0.986 (0.921-1.055)                                                                                                       | 0.596         | 1.008 (0.941-1.080)                                                                                                       | 1.034 (0.950-1.124)                                                                                                       | 0.354         | 1.004 (0.937-1.075)                                                                                                       | 0.957 (0.831-1.103)                                                                                                       | 0.254         |  | Mean Blood Pressure (1/3SBP+2/3DBP) continuous (per 10mmHg increase)                                                        |
| 1 (referent)<br>0.89 (0.68-1.16)<br>0.87 (0.67-1.13)<br>1.03 (0.81-1.31)<br>1.18 (0.90-1.56)<br>0.85 (0.54-1.32)<br>0.229 | 0.439         | 1 (referent)<br>1.21 (0.85-1.70)<br>0.96 (0.66-1.38)<br>1.08 (0.77-1.53)<br>1.38 (0.92-2.07)<br>1.22 (0.64-2.32)<br>0.357 | 1 (referent)<br>0.84 (0.64-1.10)<br>0.92 (0.71-1.21)<br>0.96 (0.74-1.23)<br>1.07 (0.78-1.46)<br>0.72 (0.42-1.24)<br>0.858 | 0.659         | 1 (referent)<br>1.10 (0.85-1.43)<br>0.99 (0.76-1.30)<br>1.03 (0.80-1.34)<br>1.25 (0.91-1.72)<br>0.85 (0.48-1.50)<br>0.684 | 1 (referent)<br>0.79 (0.55-1.13)<br>0.84 (0.59-1.19)<br>0.94 (0.68-1.30)<br>1.12 (0.76-1.65)<br>1.01 (0.57-1.80)<br>0.362 | 0.354         | 1 (referent)<br>0.96 (0.76-1.21)<br>0.86 (0.67-1.10)<br>0.94 (0.75-1.19)<br>1.11 (0.81-1.51)<br>0.89 (0.50-1.58)<br>0.974 | 1 (referent)<br>1.41 (0.51-3.88)<br>1.18 (0.45-3.13)<br>1.23 (0.49-3.12)<br>1.27 (0.49-3.32)<br>1.24 (0.43-3.63)<br>0.907 | 0.634         |  | Systolic Blood Pressure (mmHg) ESH classification<br>< 120<br>120-129<br>130-139<br>140-159<br>160-179<br>>= 180<br>p-trend |
| 1 (referent)<br>1.06 (0.87-1.30)<br>0.97 (0.77-1.23)<br>1.17 (0.95-1.43)<br>1.26 (0.93-1.71)<br>0.72 (0.34-1.54)<br>0.202 | 0.333         | 1 (referent)<br>1.07 (0.81-1.43)<br>0.96 (0.69-1.35)<br>1.33 (0.99-1.78)<br>1.10 (0.67-1.81)<br>1.04 (0.38-2.84)<br>0.18  | 1 (referent)<br>1.05 (0.85-1.31)<br>0.87 (0.67-1.12)<br>0.96 (0.76-1.21)<br>1.11 (0.79-1.56)<br>0.70 (0.31-1.58)<br>0.627 | 0.56          | 1 (referent)<br>1.09 (0.87-1.35)<br>0.85 (0.65-1.11)<br>1.12 (0.89-1.41)<br>1.28 (0.90-1.83)<br>0.76 (0.31-1.87)<br>0.466 | 1 (referent)<br>1.05 (0.79-1.39)<br>0.98 (0.72-1.35)<br>1.09 (0.82-1.45)<br>0.99 (0.64-1.55)<br>1.19 (0.55-2.58)<br>0.683 | 0.929         | 1 (referent)<br>1.00 (0.82-1.22)<br>0.92 (0.73-1.17)<br>0.98 (0.78-1.23)<br>1.22 (0.84-1.78)<br>0.55 (0.18-1.73)<br>0.909 | 1 (referent)<br>1.25 (0.73-2.14)<br>0.67 (0.36-1.26)<br>1.00 (0.60-1.66)<br>0.84 (0.44-1.60)<br>0.61 (0.18-2.07)<br>0.318 | 0.28          |  | Diastolic Blood Pressure (mmHg) ESH classification<br>< 80<br>80-84<br>85-89<br>90-99<br>100-109<br>>= 110<br>p-trend       |
| 1 (referent)<br>0.88 (0.70-1.11)<br>1.03 (0.81-1.31)<br>1.11 (0.85-1.45)<br>0.118                                         | 0.416         | 1 (referent)<br>1.08 (0.79-1.48)<br>1.09 (0.77-1.54)<br>1.36 (0.92-2.01)<br>0.157                                         | 1 (referent)<br>0.88 (0.70-1.12)<br>0.96 (0.74-1.23)<br>0.99 (0.73-1.33)<br>0.81                                          | 0.452         | 1 (referent)<br>1.05 (0.83-1.32)<br>1.04 (0.80-1.34)<br>1.17 (0.86-1.59)<br>0.402                                         | 1 (referent)<br>0.81 (0.60-1.11)<br>0.94 (0.68-1.30)<br>1.09 (0.75-1.58)<br>0.32                                          | 0.453         | 1 (referent)<br>0.91 (0.74-1.12)<br>0.95 (0.75-1.20)<br>1.07 (0.80-1.44)<br>0.718                                         | 1 (referent)<br>1.27 (0.50-3.24)<br>1.24 (0.49-3.13)<br>1.27 (0.49-3.27)<br>0.812                                         | 0.601         |  | Systolic Blood Pressure (mmHg) ASH classification<br>< 120<br>120-139<br>140-159<br>>= 160<br>p-trend                       |
| 1 (referent)<br>1.03 (0.86-1.23)<br>1.17 (0.96-1.44)<br>1.16 (0.87-1.55)<br>0.116                                         | 0.407         | 1 (referent)<br>1.03 (0.80-1.33)<br>1.33 (1.00-1.78)<br>1.09 (0.69-1.73)<br>0.147                                         | 1 (referent)<br>0.98 (0.81-1.18)<br>0.96 (0.76-1.21)<br>1.03 (0.75-1.43)<br>0.959                                         | 0.682         | 1 (referent)<br>0.99 (0.82-1.20)<br>1.12 (0.89-1.41)<br>1.19 (0.85-1.67)<br>0.221                                         | 1 (referent)<br>1.02 (0.80-1.31)<br>1.09 (0.82-1.46)<br>1.03 (0.69-1.55)<br>0.648                                         | 0.829         | 1 (referent)<br>0.97 (0.81-1.16)<br>0.98 (0.78-1.23)<br>1.11 (0.77-1.59)<br>0.88                                          | 1 (referent)<br>0.97 (0.59-1.59)<br>1.01 (0.61-1.68)<br>0.81 (0.44-1.50)<br>0.603                                         | 0.452         |  | Diastolic Blood Pressure (mmHg) ASH classification<br>< 80<br>80-89<br>90-99<br>>= 100<br>p-trend                           |
| 1 (referent)<br>0.88 (0.68-1.14)<br>1.06 (0.83-1.35)<br>1.10 (0.87-1.40)<br>0.104                                         | 0.296         | 1 (referent)<br>1.14 (0.81-1.61)<br>1.12 (0.79-1.58)<br>1.24 (0.88-1.74)<br>0.265                                         | 1 (referent)<br>1.01 (0.77-1.31)<br>1.02 (0.79-1.33)<br>1.05 (0.81-1.36)<br>0.7                                           | 0.842         | 1 (referent)<br>1.12 (0.87-1.44)<br>1.01 (0.78-1.31)<br>1.18 (0.91-1.52)<br>0.334                                         | 1 (referent)<br>0.95 (0.66-1.37)<br>1.14 (0.81-1.60)<br>1.08 (0.76-1.52)<br>0.457                                         | 0.65          | 1 (referent)<br>1.09 (0.87-1.38)<br>1.04 (0.82-1.32)<br>1.09 (0.86-1.40)<br>0.617                                         | 1 (referent)<br>1.23 (0.49-3.07)<br>0.95 (0.40-2.27)<br>0.92 (0.39-2.15)<br>0.403                                         | 0.162         |  | Mean BP (mmHg) (1/3SBP+2/3DBP) Cohort-specific quartiles<br>50.0-88.3<br>88.5-96.6<br>96.8-105.5<br>105.6-216.6<br>p-trend  |
| 1 (referent)<br>1.19 (1.02-1.38)                                                                                          | 0.107         | 1 (referent)<br>1.12 (0.90-1.40)                                                                                          | 1 (referent)<br>1.07 (0.91-1.27)                                                                                          | 0.873         | 1 (referent)<br>1.10 (0.93-1.31)                                                                                          | 1 (referent)<br>1.12 (0.90-1.38)                                                                                          | 0.591         | -<br>1 (referent)                                                                                                         | -<br>0.98 (0.80-1.21)                                                                                                     |               |  | Hypertension (SBP >= 140 mmHg, or DBP >= 90 mmHg, or self-reported)<br>Normotensive<br>Hypertensive                         |

| Lung                                                                             | Cases | Cohort | Excluding first 2 years of follow-up |                     |                     | Men                 | Women               | Sex           | BMI <= 25 mg/m <sup>2</sup> | BMI > 25 mg/m <sup>2</sup> | BMI           | Age <= 53 yrs       |
|----------------------------------------------------------------------------------|-------|--------|--------------------------------------|---------------------|---------------------|---------------------|---------------------|---------------|-----------------------------|----------------------------|---------------|---------------------|
|                                                                                  |       |        | HR (crude)                           | HR (adjusted)       | HR (adjusted)       | HR (adjusted)       | HR (adjusted)       | p-interaction | HR (adjusted)               | HR (adjusted)              | p-interaction | HR (adjusted)       |
| <b>Cases</b>                                                                     |       |        | 3229                                 | 3229                | 2993                | 1714                | 1515                |               | 1586                        | 1643                       |               | 766                 |
| <b>Cohort size</b>                                                               |       |        | 307318                               | 307318              | 301857              | 112591              | 194727              |               | 146326                      | 160992                     |               | 153303              |
| <b>Mean Systolic Blood Pressure continuous (per 10mmHg increase)</b>             | 3229  | 307318 | 1.017 (0.999-1.036)                  | 1.031 (1.012-1.050) | 1.028 (1.008-1.048) | 1.021 (0.995-1.048) | 1.042 (1.015-1.070) | 0.341         | 1.032 (1.005-1.059)         | 1.022 (0.996-1.049)        | 0.782         | 1.031 (0.987-1.076) |
| <b>Mean Diastolic Blood Pressure continuous (per 10mmHg increase)</b>            | 3229  | 307318 | 0.976 (0.943-1.009)                  | 1.000 (0.967-1.035) | 0.998 (0.963-1.035) | 0.976 (0.931-1.023) | 1.036 (0.985-1.090) | 0.149         | 1.017 (0.967-1.068)         | 0.971 (0.926-1.018)        | 0.183         | 1.033 (0.960-1.111) |
| <b>Mean Blood Pressure (1/3SBP+2/3DBP) continuous (per 10mmHg increase)</b>      | 3229  | 307318 | 1.002 (0.974-1.031)                  | 1.025 (0.996-1.055) | 1.021 (0.991-1.053) | 1.004 (0.964-1.046) | 1.052 (1.009-1.096) | 0.174         | 1.034 (0.992-1.077)         | 1.004 (0.964-1.045)        | 0.371         | 1.039 (0.975-1.107) |
| <b>Systolic Blood Pressure (mmHg) ESH classification</b>                         |       |        |                                      |                     |                     |                     |                     |               |                             |                            |               |                     |
| < 120                                                                            | 576   | 86141  | 1 (referent)                         | 1 (referent)        | 1 (referent)        | 1 (referent)        | 1 (referent)        |               | 1 (referent)                | 1 (referent)               |               | 1 (referent)        |
| 120-129                                                                          | 571   | 66446  | 0.94 (0.84-1.06)                     | 0.98 (0.87-1.10)    | 0.93 (0.83-1.05)    | 0.96 (0.80-1.14)    | 1.00 (0.85-1.17)    |               | 0.98 (0.84-1.15)            | 0.93 (0.77-1.12)           |               | 0.88 (0.72-1.08)    |
| 130-139                                                                          | 624   | 57482  | 0.99 (0.88-1.11)                     | 1.04 (0.93-1.17)    | 1.01 (0.90-1.14)    | 0.96 (0.80-1.13)    | 1.14 (0.97-1.35)    |               | 1.04 (0.89-1.22)            | 0.99 (0.83-1.18)           |               | 0.99 (0.80-1.22)    |
| 140-159                                                                          | 947   | 68235  | 0.99 (0.89-1.10)                     | 1.07 (0.95-1.19)    | 1.06 (0.94-1.18)    | 1.02 (0.87-1.20)    | 1.10 (0.95-1.29)    | 0.38          | 1.09 (0.94-1.27)            | 0.99 (0.84-1.18)           | 0.833         | 1.01 (0.81-1.25)    |
| 160-179                                                                          | 385   | 22656  | 1.08 (0.94-1.24)                     | 1.19 (1.04-1.37)    | 1.13 (0.98-1.31)    | 1.08 (0.89-1.32)    | 1.34 (1.10-1.63)    |               | 1.22 (1.00-1.48)            | 1.10 (0.90-1.34)           |               | 1.19 (0.85-1.66)    |
| >= 180                                                                           | 126   | 6358   | 1.19 (0.98-1.45)                     | 1.26 (1.03-1.54)    | 1.22 (0.99-1.50)    | 1.22 (0.93-1.61)    | 1.33 (0.99-1.79)    |               | 1.23 (0.89-1.69)            | 1.21 (0.92-1.58)           |               | 1.67 (0.95-2.96)    |
| <b>p-trend</b>                                                                   |       |        | 0.079                                | 0.002               | 0.006               | 0.114               | 0.002               |               | 0.026                       | 0.088                      |               | 0.207               |
| <b>Diastolic Blood Pressure (mmHg) ESH classification</b>                        |       |        |                                      |                     |                     |                     |                     |               |                             |                            |               |                     |
| < 80                                                                             | 1243  | 132590 | 1 (referent)                         | 1 (referent)        | 1 (referent)        | 1 (referent)        | 1 (referent)        |               | 1 (referent)                | 1 (referent)               |               | 1 (referent)        |
| 80-84                                                                            | 642   | 64872  | 0.85 (0.77-0.94)                     | 0.90 (0.81-0.99)    | 0.90 (0.81-0.99)    | 0.90 (0.79-1.03)    | 0.87 (0.76-1.01)    |               | 0.86 (0.75-0.98)            | 0.91 (0.79-1.05)           |               | 1.10 (0.91-1.33)    |
| 85-89                                                                            | 502   | 41500  | 0.95 (0.86-1.06)                     | 1.02 (0.91-1.13)    | 1.04 (0.94-1.16)    | 0.95 (0.82-1.10)    | 1.11 (0.95-1.29)    |               | 1.05 (0.90-1.22)            | 0.96 (0.83-1.12)           |               | 1.09 (0.87-1.36)    |
| 90-99                                                                            | 605   | 51196  | 0.88 (0.79-0.97)                     | 0.93 (0.84-1.03)    | 0.93 (0.83-1.03)    | 0.87 (0.76-1.00)    | 1.03 (0.88-1.20)    | 0.059         | 1.00 (0.86-1.16)            | 0.86 (0.75-0.99)           | 0.576         | 1.06 (0.85-1.32)    |
| 100-109                                                                          | 196   | 13896  | 1.01 (0.87-1.17)                     | 1.05 (0.90-1.23)    | 1.06 (0.90-1.25)    | 0.93 (0.75-1.13)    | 1.31 (1.03-1.66)    |               | 0.86 (0.65-1.13)            | 1.12 (0.93-1.36)           |               | 1.15 (0.80-1.66)    |
| >= 110                                                                           | 41    | 3264   | 0.93 (0.68-1.28)                     | 0.97 (0.71-1.32)    | 0.97 (0.70-1.35)    | 0.96 (0.66-1.40)    | 0.92 (0.51-1.68)    |               | 1.18 (0.69-2.01)            | 0.85 (0.58-1.26)           |               | 0.93 (0.41-2.10)    |
| <b>p-trend</b>                                                                   |       |        | 0.177                                | 0.907               | 0.959               | 0.154               | 0.101               |               | 0.999                       | 0.526                      |               | 0.477               |
| <b>Systolic Blood Pressure (mmHg) ASH classification</b>                         |       |        |                                      |                     |                     |                     |                     |               |                             |                            |               |                     |
| < 120                                                                            | 576   | 86141  | 1 (referent)                         | 1 (referent)        | 1 (referent)        | 1 (referent)        | 1 (referent)        |               | 1 (referent)                | 1 (referent)               |               | 1 (referent)        |
| 120-139                                                                          | 1195  | 123928 | 0.96 (0.87-1.07)                     | 1.01 (0.91-1.12)    | 0.97 (0.87-1.08)    | 0.96 (0.82-1.12)    | 1.06 (0.93-1.22)    |               | 1.01 (0.88-1.15)            | 0.96 (0.82-1.13)           |               | 0.93 (0.78-1.10)    |
| 140-159                                                                          | 947   | 68235  | 0.99 (0.89-1.10)                     | 1.06 (0.95-1.19)    | 1.05 (0.94-1.18)    | 1.02 (0.87-1.20)    | 1.10 (0.94-1.28)    | 0.448         | 1.09 (0.94-1.26)            | 0.99 (0.84-1.17)           | 0.753         | 1.00 (0.81-1.25)    |
| >= 160                                                                           | 511   | 29014  | 1.10 (0.97-1.25)                     | 1.21 (1.06-1.37)    | 1.15 (1.01-1.32)    | 1.11 (0.92-1.34)    | 1.33 (1.11-1.60)    |               | 1.22 (1.01-1.46)            | 1.12 (0.93-1.35)           |               | 1.27 (0.93-1.71)    |
| <b>p-trend</b>                                                                   |       |        | 0.112                                | 0.003               | 0.013               | 0.114               | 0.005               |               | 0.029                       | 0.117                      |               | 0.311               |
| <b>Diastolic Blood Pressure (mmHg) ASH classification</b>                        |       |        |                                      |                     |                     |                     |                     |               |                             |                            |               |                     |
| < 80                                                                             | 1243  | 132590 | 1 (referent)                         | 1 (referent)        | 1 (referent)        | 1 (referent)        | 1 (referent)        |               | 1 (referent)                | 1 (referent)               |               | 1 (referent)        |
| 80-89                                                                            | 1144  | 106372 | 0.89 (0.82-0.97)                     | 0.94 (0.87-1.03)    | 0.96 (0.88-1.04)    | 0.92 (0.82-1.04)    | 0.96 (0.86-1.08)    |               | 0.93 (0.83-1.04)            | 0.93 (0.83-1.05)           |               | 1.10 (0.93-1.30)    |
| 90-99                                                                            | 605   | 51196  | 0.88 (0.79-0.97)                     | 0.93 (0.84-1.03)    | 0.93 (0.83-1.03)    | 0.87 (0.76-1.00)    | 1.03 (0.88-1.19)    | 0.101         | 1.00 (0.86-1.16)            | 0.86 (0.75-0.99)           | 0.941         | 1.06 (0.85-1.32)    |
| >= 100                                                                           | 237   | 17160  | 0.99 (0.86-1.14)                     | 1.04 (0.90-1.20)    | 1.04 (0.90-1.21)    | 0.93 (0.77-1.12)    | 1.24 (0.99-1.56)    |               | 0.91 (0.71-1.17)            | 1.07 (0.89-1.28)           |               | 1.11 (0.79-1.57)    |
| <b>p-trend</b>                                                                   |       |        | 0.088                                | 0.603               | 0.61                | 0.113               | 0.236               |               | 0.507                       | 0.572                      |               | 0.41                |
| <b>Mean BP (mmHg) (1/3SBP+2/3DBP) Cohort-specific quartiles</b>                  |       |        |                                      |                     |                     |                     |                     |               |                             |                            |               |                     |
| 50.0-88.3                                                                        | 558   | 76991  | 1 (referent)                         | 1 (referent)        | 1 (referent)        | 1 (referent)        | 1 (referent)        |               | 1 (referent)                | 1 (referent)               |               | 1 (referent)        |
| 88.5-96.6                                                                        | 733   | 77727  | 0.97 (0.86-1.08)                     | 1.02 (0.91-1.14)    | 0.97 (0.86-1.09)    | 1.03 (0.86-1.22)    | 1.02 (0.88-1.19)    |               | 1.00 (0.87-1.16)            | 0.99 (0.83-1.19)           |               | 0.97 (0.79-1.19)    |
| 96.8-105.5                                                                       | 852   | 76327  | 0.92 (0.83-1.03)                     | 1.00 (0.90-1.12)    | 0.99 (0.88-1.11)    | 1.05 (0.89-1.24)    | 0.96 (0.82-1.12)    | 0.192         | 1.03 (0.89-1.19)            | 0.92 (0.78-1.10)           | 0.204         | 1.05 (0.85-1.30)    |
| 105.6-216.6                                                                      | 1086  | 76273  | 0.97 (0.88-1.08)                     | 1.07 (0.96-1.19)    | 1.04 (0.93-1.16)    | 1.00 (0.85-1.18)    | 1.19 (1.02-1.38)    |               | 1.12 (0.96-1.29)            | 0.97 (0.82-1.14)           |               | 1.10 (0.88-1.38)    |
| <b>p-trend</b>                                                                   |       |        | 0.612                                | 0.24                | 0.353               | 0.895               | 0.048               |               | 0.129                       | 0.62                       |               | 0.311               |
| <b>Hypertension (SBP &gt;= 140 mmHg, or DBP &gt;= 90 mmHg, or self-reported)</b> |       |        |                                      |                     |                     |                     |                     |               |                             |                            |               |                     |
| Normotensive                                                                     | 1522  | 174179 | 1 (referent)                         | 1 (referent)        | 1 (referent)        | 1 (referent)        | 1 (referent)        |               | 1 (referent)                | 1 (referent)               |               | 1 (referent)        |
| Hypertensive                                                                     | 1707  | 133139 | 0.96 (0.90-1.03)                     | 1.04 (0.97-1.12)    | 1.03 (0.96-1.12)    | 1.01 (0.91-1.12)    | 1.08 (0.97-1.21)    | 0.618         | 1.04 (0.94-1.16)            | 1.02 (0.92-1.13)           | 0.882         | 1.07 (0.91-1.25)    |

| Age > 53 yrs                                                                                                              | Age           | Never smokers                                                                                                             | Ever smokers                                                                                                              | Smoking       | Alcohol <= 12g                                                                                                            | Alcohol > 12g                                                                                                             | Alcohol       | No antihypertensive treatment                                                                                             | Antihypertensive treatment                                                                                                | Treatment     | Lung                                                                                                                        |
|---------------------------------------------------------------------------------------------------------------------------|---------------|---------------------------------------------------------------------------------------------------------------------------|---------------------------------------------------------------------------------------------------------------------------|---------------|---------------------------------------------------------------------------------------------------------------------------|---------------------------------------------------------------------------------------------------------------------------|---------------|---------------------------------------------------------------------------------------------------------------------------|---------------------------------------------------------------------------------------------------------------------------|---------------|-----------------------------------------------------------------------------------------------------------------------------|
| HR (adjusted)                                                                                                             | p-interaction | HR (adjusted)                                                                                                             | HR (adjusted)                                                                                                             | p-interaction | HR (adjusted)                                                                                                             | HR (adjusted)                                                                                                             | p-interaction | HR (adjusted)                                                                                                             | HR (adjusted)                                                                                                             | p-interaction |                                                                                                                             |
| 2463<br>154015                                                                                                            |               | 280<br>141931                                                                                                             | 2922<br>160623                                                                                                            |               | 1862<br>205214                                                                                                            | 1367<br>102104                                                                                                            |               | 2225<br>227336                                                                                                            | 409<br>37017                                                                                                              |               | Cases<br>Cohort size                                                                                                        |
| 1.032 (1.011-1.054)                                                                                                       | 0.721         | 1.051 (0.986-1.120)                                                                                                       | 1.026 (1.006-1.046)                                                                                                       | 0.758         | 1.021 (0.996-1.047)                                                                                                       | 1.042 (1.013-1.071)                                                                                                       | 0.177         | 1.034 (1.010-1.059)                                                                                                       | 1.084 (1.032-1.140)                                                                                                       | 0.32          | Mean Systolic Blood Pressure continuous (per 10mmHg increase)                                                               |
| 0.993 (0.955-1.033)                                                                                                       | 0.7           | 1.003 (0.890-1.130)                                                                                                       | 0.987 (0.952-1.023)                                                                                                       | 0.912         | 0.973 (0.929-1.018)                                                                                                       | 1.033 (0.980-1.088)                                                                                                       | 0.148         | 1.012 (0.969-1.058)                                                                                                       | 0.981 (0.888-1.083)                                                                                                       | 0.462         | Mean Diastolic Blood Pressure continuous (per 10mmHg increase)                                                              |
| 1.024 (0.991-1.057)                                                                                                       | 0.963         | 1.042 (0.943-1.152)                                                                                                       | 1.014 (0.984-1.046)                                                                                                       | 0.915         | 1.004 (0.966-1.043)                                                                                                       | 1.050 (1.005-1.096)                                                                                                       | 0.128         | 1.033 (0.996-1.073)                                                                                                       | 1.066 (0.981-1.159)                                                                                                       | 0.836         | Mean Blood Pressure (1/3SBP+2/3DBP) continuous (per 10mmHg increase)                                                        |
| 1 (referent)<br>1.04 (0.90-1.21)<br>1.09 (0.95-1.26)<br>1.11 (0.97-1.27)<br>1.24 (1.06-1.45)<br>1.28 (1.03-1.60)<br>0.002 | 0.562         | 1 (referent)<br>1.21 (0.80-1.81)<br>1.36 (0.91-2.04)<br>1.11 (0.74-1.66)<br>1.48 (0.92-2.38)<br>1.68 (0.86-3.29)<br>0.176 | 1 (referent)<br>0.94 (0.83-1.07)<br>1.01 (0.89-1.14)<br>1.04 (0.93-1.17)<br>1.13 (0.98-1.31)<br>1.22 (0.99-1.51)<br>0.011 | 0.847         | 1 (referent)<br>0.97 (0.84-1.12)<br>1.02 (0.88-1.18)<br>1.02 (0.88-1.18)<br>1.11 (0.92-1.33)<br>1.25 (0.95-1.65)<br>0.123 | 1 (referent)<br>0.98 (0.81-1.20)<br>1.07 (0.88-1.30)<br>1.12 (0.94-1.34)<br>1.30 (1.05-1.61)<br>1.30 (0.96-1.75)<br>0.004 | 0.143         | 1 (referent)<br>0.96 (0.84-1.10)<br>1.06 (0.93-1.21)<br>1.06 (0.93-1.21)<br>1.25 (1.05-1.48)<br>1.24 (0.93-1.66)<br>0.01  | 1 (referent)<br>0.93 (0.52-1.67)<br>0.80 (0.46-1.39)<br>1.00 (0.60-1.65)<br>1.22 (0.73-2.05)<br>1.55 (0.88-2.71)<br>0.006 | 0.289         | Systolic Blood Pressure (mmHg) ESH classification<br>< 120<br>120-129<br>130-139<br>140-159<br>160-179<br>>= 180<br>p-trend |
| 1 (referent)<br>0.84 (0.75-0.94)<br>0.99 (0.88-1.12)<br>0.90 (0.80-1.01)<br>1.03 (0.87-1.22)<br>0.97 (0.69-1.36)<br>0.678 | 0.746         | 1 (referent)<br>0.97 (0.70-1.34)<br>0.96 (0.66-1.38)<br>0.87 (0.61-1.24)<br>1.53 (0.96-2.45)<br>0.91 (0.29-2.91)<br>0.734 | 1 (referent)<br>0.88 (0.79-0.97)<br>0.99 (0.89-1.11)<br>0.91 (0.82-1.02)<br>0.97 (0.82-1.15)<br>0.95 (0.68-1.31)<br>0.376 | 0.784         | 1 (referent)<br>0.88 (0.78-1.00)<br>0.94 (0.82-1.09)<br>0.92 (0.80-1.05)<br>0.97 (0.78-1.21)<br>0.85 (0.54-1.35)<br>0.298 | 1 (referent)<br>0.92 (0.79-1.08)<br>1.11 (0.94-1.30)<br>0.96 (0.82-1.12)<br>1.16 (0.93-1.45)<br>1.07 (0.69-1.66)<br>0.377 | 0.262         | 1 (referent)<br>0.87 (0.78-0.98)<br>1.02 (0.90-1.16)<br>0.96 (0.85-1.09)<br>1.14 (0.92-1.41)<br>0.76 (0.45-1.30)<br>0.806 | 1 (referent)<br>0.81 (0.56-1.15)<br>1.02 (0.73-1.43)<br>0.85 (0.62-1.17)<br>0.97 (0.67-1.40)<br>0.97 (0.54-1.76)<br>0.918 | 0.725         | Diastolic Blood Pressure (mmHg) ESH classification<br>< 80<br>80-84<br>85-89<br>90-99<br>100-109<br>>= 110<br>p-trend       |
| 1 (referent)<br>1.07 (0.94-1.21)<br>1.11 (0.97-1.27)<br>1.25 (1.08-1.45)<br>0.003                                         | 0.465         | 1 (referent)<br>1.28 (0.89-1.84)<br>1.11 (0.74-1.65)<br>1.51 (0.97-2.37)<br>0.214                                         | 1 (referent)<br>0.97 (0.87-1.08)<br>1.04 (0.92-1.17)<br>1.15 (1.00-1.32)<br>0.019                                         | 0.881         | 1 (referent)<br>0.99 (0.87-1.13)<br>1.02 (0.88-1.17)<br>1.14 (0.96-1.35)<br>0.164                                         | 1 (referent)<br>1.03 (0.87-1.22)<br>1.12 (0.94-1.34)<br>1.30 (1.06-1.59)<br>0.004                                         | 0.133         | 1 (referent)<br>1.01 (0.90-1.13)<br>1.06 (0.93-1.20)<br>1.24 (1.05-1.46)<br>0.016                                         | 1 (referent)<br>0.85 (0.51-1.43)<br>1.00 (0.60-1.65)<br>1.31 (0.78-2.17)<br>0.006                                         | 0.266         | Systolic Blood Pressure (mmHg) ASH classification<br>< 120<br>120-139<br>140-159<br>>= 160<br>p-trend                       |
| 1 (referent)<br>0.90 (0.82-0.99)<br>0.90 (0.80-1.01)<br>1.01 (0.87-1.19)<br>0.356                                         | 0.533         | 1 (referent)<br>0.97 (0.73-1.28)<br>0.87 (0.61-1.24)<br>1.42 (0.91-2.23)<br>0.587                                         | 1 (referent)<br>0.92 (0.85-1.01)<br>0.91 (0.82-1.01)<br>0.97 (0.83-1.12)<br>0.184                                         | 0.562         | 1 (referent)<br>0.90 (0.81-1.01)<br>0.91 (0.80-1.05)<br>0.95 (0.78-1.17)<br>0.216                                         | 1 (referent)<br>1.00 (0.88-1.14)<br>0.96 (0.82-1.12)<br>1.14 (0.93-1.41)<br>0.593                                         | 0.317         | 1 (referent)<br>0.93 (0.84-1.03)<br>0.96 (0.85-1.09)<br>1.08 (0.88-1.31)<br>0.856                                         | 1 (referent)<br>0.91 (0.67-1.24)<br>0.85 (0.62-1.16)<br>0.96 (0.67-1.37)<br>0.726                                         | 0.698         | Diastolic Blood Pressure (mmHg) ASH classification<br>< 80<br>80-89<br>90-99<br>>= 100<br>p-trend                           |
| 1 (referent)<br>1.05 (0.92-1.21)<br>1.00 (0.88-1.14)<br>1.08 (0.94-1.22)<br>0.36                                          | 0.982         | 1 (referent)<br>1.17 (0.80-1.72)<br>1.02 (0.69-1.51)<br>1.14 (0.77-1.68)<br>0.724                                         | 1 (referent)<br>0.99 (0.88-1.12)<br>0.98 (0.87-1.10)<br>1.03 (0.92-1.16)<br>0.567                                         | 0.844         | 1 (referent)<br>1.03 (0.90-1.19)<br>0.96 (0.83-1.10)<br>1.01 (0.88-1.16)<br>0.846                                         | 1 (referent)<br>0.98 (0.81-1.19)<br>1.06 (0.88-1.27)<br>1.14 (0.95-1.37)<br>0.053                                         | 0.113         | 1 (referent)<br>1.03 (0.91-1.17)<br>1.02 (0.90-1.16)<br>1.11 (0.97-1.27)<br>0.15                                          | 1 (referent)<br>0.74 (0.42-1.30)<br>0.82 (0.50-1.34)<br>0.91 (0.57-1.46)<br>0.552                                         | 0.893         | Mean BP (mmHg) (1/3SBP+2/3DBP) Cohort-specific quartiles<br>50.0-88.3<br>88.5-96.6<br>96.6-105.5<br>105.6-216.6<br>p-trend  |
| 1 (referent)<br>1.04 (0.95-1.13)                                                                                          | 0.901         | 1 (referent)<br>1.00 (0.77-1.28)                                                                                          | 1 (referent)<br>1.01 (0.94-1.10)                                                                                          | 0.71          | 1 (referent)<br>1.01 (0.92-1.12)                                                                                          | 1 (referent)<br>1.07 (0.96-1.20)                                                                                          | 0.321         | -<br>1 (referent)                                                                                                         | -<br>0.98 (0.87-1.10)                                                                                                     |               | Hypertension (SBP >= 140 mmHg, or DBP >= 90 mmHg, or self-reported)<br>Normotensive<br>Hypertensive                         |

| Lung AC                                                              |        | Excluding first 2 years of follow-up |                     |                     | Men                 | Women               | Sex                 | BMI <= 25 mg/m <sup>2</sup> | BMI > 25 mg/m <sup>2</sup> | BMI                 | Age <= 53 yrs |                     |
|----------------------------------------------------------------------|--------|--------------------------------------|---------------------|---------------------|---------------------|---------------------|---------------------|-----------------------------|----------------------------|---------------------|---------------|---------------------|
| Cases                                                                | Cohort | HR (crude)                           | HR (adjusted)       | HR (adjusted)       | HR (adjusted)       | HR (adjusted)       | p-interaction       | HR (adjusted)               | HR (adjusted)              | p-interaction       | HR (adjusted) |                     |
| Cases                                                                |        | 1130                                 | 1130                | 1052                | 517                 | 613                 |                     | 602                         | 528                        |                     | 301           |                     |
| Cohort size                                                          |        | 307318                               | 307318              | 301857              | 112591              | 194727              |                     | 146326                      | 160992                     |                     | 153303        |                     |
| Mean Systolic Blood Pressure continuous (per 10mmHg increase)        | 1130   | 307318                               | 0.994 (0.964-1.026) | 1.023 (0.991-1.055) | 1.023 (0.990-1.057) | 1.005 (0.957-1.055) | 1.038 (0.996-1.081) | 0.296                       | 1.045 (1.002-1.091)        | 0.982 (0.937-1.029) | 0.099         | 1.003 (0.935-1.076) |
| Mean Diastolic Blood Pressure continuous (per 10mmHg increase)       | 1130   | 307318                               | 0.927 (0.875-0.982) | 0.980 (0.924-1.040) | 0.981 (0.922-1.043) | 0.959 (0.878-1.048) | 1.000 (0.923-1.083) | 0.652                       | 1.028 (0.948-1.114)        | 0.899 (0.825-0.979) | 0.029         | 0.958 (0.851-1.080) |
| Mean Blood Pressure (1/3SBP+2/3DBP) continuous (per 10mmHg increase) | 1130   | 307318                               | 0.960 (0.915-1.008) | 1.009 (0.960-1.060) | 1.009 (0.959-1.063) | 0.984 (0.912-1.060) | 1.032 (0.966-1.102) | 0.4                         | 1.050 (0.982-1.123)        | 0.936 (0.871-1.007) | 0.036         | 0.981 (0.884-1.088) |
| Systolic Blood Pressure (mmHg) ESH classification                    |        |                                      |                     |                     |                     |                     |                     |                             |                            |                     |               |                     |
| < 120                                                                | 229    | 86141                                | 1 (referent)        |                             | 1 (referent)               | 1 (referent)        |               | 1 (referent)        |
| 120-129                                                              | 204    | 66446                                | 0.83 (0.69-1.01)    | 0.90 (0.75-1.09)    | 0.87 (0.71-1.06)    | 0.77 (0.57-1.04)    | 1.00 (0.78-1.29)    |                             | 0.94 (0.74-1.20)           | 0.79 (0.58-1.08)    |               | 0.79 (0.57-1.09)    |
| 130-139                                                              | 206    | 57482                                | 0.82 (0.68-1.00)    | 0.93 (0.76-1.12)    | 0.90 (0.74-1.10)    | 0.77 (0.57-1.03)    | 1.05 (0.81-1.36)    |                             | 0.95 (0.74-1.23)           | 0.80 (0.59-1.08)    |               | 0.93 (0.66-1.31)    |
| 140-159                                                              | 318    | 68235                                | 0.85 (0.71-1.01)    | 0.99 (0.82-1.19)    | 0.97 (0.80-1.17)    | 0.85 (0.64-1.12)    | 1.08 (0.85-1.38)    | 0.223                       | 0.96 (0.76-1.23)           | 0.88 (0.67-1.17)    | 0.154         | 0.89 (0.63-1.27)    |
| 160-179                                                              | 129    | 22656                                | 0.94 (0.75-1.18)    | 1.14 (0.91-1.44)    | 1.14 (0.90-1.45)    | 0.96 (0.68-1.36)    | 1.28 (0.94-1.75)    |                             | 1.43 (1.05-1.95)           | 0.81 (0.57-1.14)    |               | 1.06 (0.62-1.84)    |
| >= 180                                                               | 44     | 6358                                 | 1.08 (0.77-1.50)    | 1.27 (0.91-1.78)    | 1.24 (0.87-1.76)    | 0.91 (0.54-1.54)    | 1.65 (1.07-2.55)    |                             | 1.66 (1.04-2.63)           | 0.86 (0.53-1.41)    |               | 2.31 (1.05-5.06)    |
| p-trend                                                              |        |                                      | 0.796               | 0.119               | 0.14                | 0.915               | 0.041               |                             | 0.054                      | 0.625               |               | 0.611               |
| Diastolic Blood Pressure (mmHg) ESH classification                   |        |                                      |                     |                     |                     |                     |                     |                             |                            |                     |               |                     |
| < 80                                                                 | 464    | 132590                               | 1 (referent)        |                             | 1 (referent)               | 1 (referent)        |               | 1 (referent)        |
| 80-84                                                                | 221    | 64872                                | 0.77 (0.66-0.91)    | 0.83 (0.71-0.98)    | 0.85 (0.72-1.00)    | 0.84 (0.66-1.07)    | 0.80 (0.64-1.00)    |                             | 0.84 (0.68-1.05)           | 0.78 (0.61-1.00)    |               | 1.18 (0.89-1.57)    |
| 85-89                                                                | 176    | 41500                                | 0.88 (0.74-1.05)    | 0.99 (0.83-1.18)    | 0.99 (0.82-1.19)    | 0.84 (0.65-1.10)    | 1.12 (0.88-1.42)    |                             | 1.09 (0.85-1.39)           | 0.83 (0.64-1.08)    |               | 0.84 (0.57-1.23)    |
| 90-99                                                                | 190    | 51196                                | 0.74 (0.62-0.87)    | 0.84 (0.70-1.00)    | 0.83 (0.69-0.99)    | 0.76 (0.59-0.98)    | 0.91 (0.71-1.16)    | 0.331                       | 0.87 (0.67-1.11)           | 0.75 (0.58-0.95)    | 0.205         | 0.81 (0.55-1.18)    |
| 100-109                                                              | 64     | 13896                                | 0.89 (0.68-1.16)    | 1.01 (0.78-1.33)    | 1.05 (0.80-1.38)    | 0.91 (0.63-1.32)    | 1.12 (0.75-1.67)    |                             | 0.98 (0.64-1.51)           | 0.92 (0.65-1.30)    |               | 0.94 (0.50-1.77)    |
| >= 110                                                               | 15     | 3264                                 | 0.94 (0.56-1.57)    | 1.08 (0.65-1.82)    | 1.10 (0.64-1.89)    | 0.96 (0.49-1.89)    | 1.30 (0.57-2.93)    |                             | 1.91 (0.94-3.89)           | 0.63 (0.29-1.34)    |               | 1.61 (0.59-4.42)    |
| p-trend                                                              |        |                                      | 0.012               | 0.43                | 0.457               | 0.151               | 0.758               |                             | 0.996                      | 0.073               |               | 0.393               |
| Systolic Blood Pressure (mmHg) ASH classification                    |        |                                      |                     |                     |                     |                     |                     |                             |                            |                     |               |                     |
| < 120                                                                | 229    | 86141                                | 1 (referent)        |                             | 1 (referent)               | 1 (referent)        |               | 1 (referent)        |
| 120-139                                                              | 410    | 123928                               | 0.83 (0.70-0.98)    | 0.91 (0.77-1.08)    | 0.88 (0.74-1.05)    | 0.77 (0.59-1.00)    | 1.03 (0.83-1.27)    |                             | 0.95 (0.77-1.17)           | 0.80 (0.61-1.05)    |               | 0.85 (0.65-1.12)    |
| 140-159                                                              | 318    | 68235                                | 0.85 (0.71-1.01)    | 0.99 (0.82-1.19)    | 0.97 (0.80-1.17)    | 0.85 (0.64-1.12)    | 1.08 (0.85-1.38)    | 0.279                       | 0.96 (0.76-1.23)           | 0.88 (0.67-1.17)    | 0.121         | 0.89 (0.62-1.26)    |
| >= 160                                                               | 173    | 29014                                | 0.97 (0.79-1.20)    | 1.17 (0.94-1.45)    | 1.16 (0.93-1.45)    | 0.95 (0.69-1.32)    | 1.36 (1.02-1.81)    |                             | 1.48 (1.12-1.97)           | 0.82 (0.59-1.14)    |               | 1.26 (0.78-2.03)    |
| p-trend                                                              |        |                                      | 0.826               | 0.118               | 0.138               | 0.809               | 0.051               |                             | 0.041                      | 0.59                |               | 0.849               |
| Diastolic Blood Pressure (mmHg) ASH classification                   |        |                                      |                     |                     |                     |                     |                     |                             |                            |                     |               |                     |
| < 80                                                                 | 464    | 132590                               | 1 (referent)        |                             | 1 (referent)               | 1 (referent)        |               | 1 (referent)        |
| 80-89                                                                | 397    | 106372                               | 0.82 (0.71-0.94)    | 0.89 (0.78-1.03)    | 0.90 (0.78-1.04)    | 0.84 (0.68-1.04)    | 0.92 (0.77-1.11)    |                             | 0.93 (0.78-1.12)           | 0.81 (0.65-0.99)    |               | 1.05 (0.81-1.36)    |
| 90-99                                                                | 190    | 51196                                | 0.74 (0.62-0.87)    | 0.84 (0.70-1.00)    | 0.82 (0.69-0.99)    | 0.76 (0.59-0.98)    | 0.91 (0.71-1.16)    | 0.56                        | 0.86 (0.67-1.11)           | 0.75 (0.58-0.95)    | 0.334         | 0.81 (0.56-1.19)    |
| >= 100                                                               | 79     | 17160                                | 0.90 (0.71-1.14)    | 1.02 (0.80-1.31)    | 1.06 (0.82-1.36)    | 0.92 (0.66-1.29)    | 1.14 (0.79-1.65)    |                             | 1.12 (0.77-1.63)           | 0.86 (0.62-1.19)    |               | 1.07 (0.62-1.85)    |
| p-trend                                                              |        |                                      | 0.005               | 0.247               | 0.296               | 0.148               | 0.816               |                             | 0.62                       | 0.07                |               | 0.652               |
| Mean BP (mmHg) (1/3SBP+2/3DBP) Cohort-specific quartiles             |        |                                      |                     |                     |                     |                     |                     |                             |                            |                     |               |                     |
| 50.0-88.3                                                            | 223    | 76991                                | 1 (referent)        |                             | 1 (referent)               | 1 (referent)        |               | 1 (referent)        |
| 88.5-96.6                                                            | 265    | 77727                                | 0.87 (0.72-1.04)    | 0.95 (0.79-1.13)    | 0.92 (0.76-1.11)    | 0.96 (0.72-1.30)    | 0.92 (0.73-1.16)    |                             | 1.01 (0.80-1.27)           | 0.78 (0.58-1.05)    |               | 0.95 (0.70-1.29)    |
| 96.8-105.5                                                           | 276    | 76327                                | 0.75 (0.63-0.90)    | 0.86 (0.72-1.04)    | 0.86 (0.71-1.04)    | 0.84 (0.63-1.13)    | 0.87 (0.68-1.10)    | 0.278                       | 0.91 (0.72-1.16)           | 0.70 (0.53-0.93)    | 0.075         | 0.74 (0.53-1.05)    |
| 105.6-216.6                                                          | 366    | 76273                                | 0.84 (0.70-0.99)    | 1.00 (0.83-1.20)    | 0.98 (0.81-1.18)    | 0.89 (0.66-1.19)    | 1.11 (0.88-1.40)    |                             | 1.15 (0.91-1.45)           | 0.74 (0.56-0.97)    |               | 1.01 (0.71-1.43)    |
| p-trend                                                              |        |                                      | 0.036               | 0.948               | 0.906               | 0.334               | 0.449               |                             | 0.399                      | 0.065               |               | 0.636               |
| Hypertension (SBP >= 140 mmHg, or DBP >= 90 mmHg, or self-reported)  |        |                                      |                     |                     |                     |                     |                     |                             |                            |                     |               |                     |
| Normotensive                                                         | 557    | 174179                               | 1 (referent)        |                             | 1 (referent)               | 1 (referent)        |               | 1 (referent)        |
| Hypertensive                                                         | 573    | 133139                               | 0.92 (0.82-1.04)    | 1.04 (0.91-1.17)    | 1.03 (0.90-1.17)    | 0.96 (0.80-1.15)    | 1.10 (0.93-1.30)    | 0.336                       | 1.04 (0.88-1.23)           | 0.97 (0.81-1.16)    | 0.731         | 0.95 (0.74-1.22)    |



| Lung SCC                                                                         |        |            |                     |                     | Excluding first<br>2 years of follow-up | Men                 | Women               | Sex           | BMI <= 25 mg/m <sup>2</sup> | BMI > 25 mg/m <sup>2</sup> | BMI           | Age <= 53 yrs       |
|----------------------------------------------------------------------------------|--------|------------|---------------------|---------------------|-----------------------------------------|---------------------|---------------------|---------------|-----------------------------|----------------------------|---------------|---------------------|
| Cases                                                                            | Cohort | HR (crude) | HR (adjusted)       | HR (adjusted)       | HR (adjusted)                           | HR (adjusted)       | HR (adjusted)       | p-interaction | HR (adjusted)               | HR (adjusted)              | p-interaction | HR (adjusted)       |
| Cases                                                                            |        | 613        | 613                 | 569                 | 405                                     | 208                 |                     |               | 282                         | 331                        |               | 116                 |
| Cohort size                                                                      |        | 307318     | 307318              | 301857              | 112591                                  | 194727              |                     |               | 146326                      | 160992                     |               | 153303              |
| <b>Mean Systolic Blood Pressure continuous (per 10mmHg increase)</b>             | 613    | 307318     | 0.995 (0.954-1.037) | 0.990 (0.948-1.033) | 0.985 (0.941-1.030)                     | 0.990 (0.938-1.045) | 0.988 (0.920-1.062) | 0.887         | 0.969 (0.909-1.033)         | 1.004 (0.947-1.065)        | 0.433         | 1.009 (0.901-1.130) |
| <b>Mean Diastolic Blood Pressure continuous (per 10mmHg increase)</b>            | 613    | 307318     | 0.981 (0.909-1.059) | 0.965 (0.892-1.045) | 0.967 (0.891-1.049)                     | 0.931 (0.845-1.025) | 1.037 (0.905-1.188) | 0.269         | 0.990 (0.881-1.113)         | 0.942 (0.848-1.047)        | 0.618         | 1.027 (0.851-1.239) |
| <b>Mean Blood Pressure (1/3SBP+2/3DBP) continuous (per 10mmHg increase)</b>      | 613    | 307318     | 0.987 (0.926-1.053) | 0.975 (0.912-1.043) | 0.972 (0.907-1.042)                     | 0.958 (0.882-1.041) | 1.007 (0.900-1.126) | 0.589         | 0.971 (0.880-1.071)         | 0.975 (0.891-1.066)        | 0.901         | 1.020 (0.865-1.204) |
| <b>Systolic Blood Pressure (mmHg) ESH classification</b>                         |        |            |                     |                     |                                         |                     |                     |               |                             |                            |               |                     |
| < 120                                                                            | 105    | 86141      | 1 (referent)        | 1 (referent)        | 1 (referent)                            | 1 (referent)        | 1 (referent)        |               | 1 (referent)                | 1 (referent)               |               | 1 (referent)        |
| 120-129                                                                          | 117    | 66446      | 1.02 (0.78-1.34)    | 1.00 (0.77-1.31)    | 0.92 (0.69-1.21)                        | 1.07 (0.76-1.52)    | 0.90 (0.58-1.39)    |               | 0.89 (0.62-1.27)            | 1.15 (0.76-1.74)           |               | 1.13 (0.67-1.90)    |
| 130-139                                                                          | 111    | 57482      | 0.91 (0.69-1.19)    | 0.87 (0.66-1.15)    | 0.85 (0.64-1.13)                        | 0.78 (0.54-1.12)    | 1.12 (0.73-1.72)    |               | 0.84 (0.58-1.23)            | 0.93 (0.61-1.41)           |               | 0.84 (0.45-1.55)    |
| 140-159                                                                          | 184    | 68235      | 0.94 (0.73-1.21)    | 0.91 (0.70-1.18)    | 0.89 (0.68-1.16)                        | 0.89 (0.64-1.24)    | 0.97 (0.64-1.47)    | 0.83          | 1.00 (0.71-1.40)            | 0.87 (0.59-1.30)           | 0.476         | 1.31 (0.76-2.27)    |
| 160-179                                                                          | 77     | 22656      | 1.04 (0.77-1.41)    | 1.02 (0.75-1.40)    | 0.97 (0.70-1.34)                        | 0.97 (0.65-1.44)    | 1.16 (0.69-1.94)    |               | 0.71 (0.42-1.19)            | 1.23 (0.80-1.90)           |               | 1.60 (0.73-3.54)    |
| >= 180                                                                           | 19     | 6358       | 0.87 (0.53-1.43)    | 0.81 (0.49-1.34)    | 0.76 (0.45-1.29)                        | 0.94 (0.53-1.67)    | 0.46 (0.14-1.49)    |               | 0.54 (0.21-1.39)            | 0.99 (0.52-1.86)           |               | no cases            |
| p-trend                                                                          |        |            | 0.689               | 0.543               | 0.507                                   | 0.505               | 0.92                |               | 0.323                       | 0.985                      |               | 0.468               |
| <b>Diastolic Blood Pressure (mmHg) ESH classification</b>                        |        |            |                     |                     |                                         |                     |                     |               |                             |                            |               |                     |
| < 80                                                                             | 234    | 132590     | 1 (referent)        | 1 (referent)        | 1 (referent)                            | 1 (referent)        | 1 (referent)        |               | 1 (referent)                | 1 (referent)               |               | 1 (referent)        |
| 80-84                                                                            | 128    | 64872      | 0.92 (0.74-1.15)    | 0.94 (0.75-1.17)    | 0.96 (0.76-1.21)                        | 0.97 (0.74-1.28)    | 0.87 (0.59-1.28)    |               | 0.90 (0.65-1.24)            | 0.96 (0.71-1.31)           |               | 0.87 (0.52-1.47)    |
| 85-89                                                                            | 91     | 41500      | 0.89 (0.70-1.14)    | 0.89 (0.70-1.14)    | 0.96 (0.75-1.24)                        | 0.82 (0.60-1.12)    | 1.08 (0.71-1.63)    |               | 1.00 (0.70-1.44)            | 0.83 (0.59-1.16)           |               | 0.92 (0.51-1.67)    |
| 90-99                                                                            | 115    | 51196      | 0.87 (0.69-1.09)    | 0.84 (0.67-1.07)    | 0.88 (0.69-1.12)                        | 0.82 (0.62-1.09)    | 0.87 (0.57-1.34)    | 0.253         | 1.04 (0.74-1.46)            | 0.73 (0.53-1.00)           | 0.785         | 1.33 (0.80-2.21)    |
| 100-109                                                                          | 36     | 13896      | 0.95 (0.67-1.36)    | 0.88 (0.61-1.26)    | 0.90 (0.62-1.31)                        | 0.69 (0.44-1.09)    | 1.55 (0.86-2.80)    |               | 0.62 (0.30-1.27)            | 0.96 (0.63-1.47)           |               | 1.00 (0.39-2.58)    |
| >= 110                                                                           | 9      | 3264       | 1.05 (0.54-2.05)    | 0.93 (0.47-1.82)    | 0.92 (0.45-1.88)                        | 0.97 (0.47-1.99)    | 0.58 (0.08-4.20)    |               | 0.44 (0.06-3.17)            | 1.07 (0.52-2.21)           |               | no cases            |
| p-trend                                                                          |        |            | 0.356               | 0.174               | 0.332                                   | 0.066               | 0.767               |               | 0.528                       | 0.194                      |               | 0.651               |
| <b>Systolic Blood Pressure (mmHg) ASH classification</b>                         |        |            |                     |                     |                                         |                     |                     |               |                             |                            |               |                     |
| < 120                                                                            | 105    | 86141      | 1 (referent)        | 1 (referent)        | 1 (referent)                            | 1 (referent)        | 1 (referent)        |               | 1 (referent)                | 1 (referent)               |               | 1 (referent)        |
| 120-139                                                                          | 228    | 123928     | 0.97 (0.76-1.22)    | 0.94 (0.74-1.19)    | 0.88 (0.69-1.13)                        | 0.92 (0.67-1.26)    | 1.01 (0.70-1.45)    |               | 0.87 (0.63-1.19)            | 1.03 (0.71-1.50)           |               | 1.01 (0.62-1.62)    |
| 140-159                                                                          | 184    | 68235      | 0.94 (0.73-1.21)    | 0.91 (0.71-1.18)    | 0.89 (0.69-1.16)                        | 0.90 (0.64-1.25)    | 0.97 (0.64-1.46)    | 0.91          | 1.00 (0.71-1.41)            | 0.88 (0.59-1.31)           | 0.301         | 1.33 (0.77-2.30)    |
| >= 160                                                                           | 96     | 29014      | 1.00 (0.75-1.34)    | 0.98 (0.73-1.32)    | 0.92 (0.68-1.26)                        | 0.97 (0.66-1.42)    | 0.98 (0.60-1.63)    |               | 0.67 (0.41-1.08)            | 1.19 (0.78-1.81)           |               | 1.36 (0.62-2.99)    |
| p-trend                                                                          |        |            | 0.949               | 0.845               | 0.697                                   | 0.892               | 0.886               |               | 0.33                        | 0.627                      |               | 0.259               |
| <b>Diastolic Blood Pressure (mmHg) ASH classification</b>                        |        |            |                     |                     |                                         |                     |                     |               |                             |                            |               |                     |
| < 80                                                                             | 234    | 132590     | 1 (referent)        | 1 (referent)        | 1 (referent)                            | 1 (referent)        | 1 (referent)        |               | 1 (referent)                | 1 (referent)               |               | 1 (referent)        |
| 80-89                                                                            | 219    | 106372     | 0.91 (0.75-1.10)    | 0.92 (0.76-1.11)    | 0.96 (0.79-1.17)                        | 0.91 (0.72-1.15)    | 0.95 (0.69-1.31)    |               | 0.94 (0.71-1.23)            | 0.90 (0.69-1.18)           |               | 0.89 (0.57-1.39)    |
| 90-99                                                                            | 115    | 51196      | 0.87 (0.69-1.09)    | 0.84 (0.67-1.07)    | 0.88 (0.69-1.12)                        | 0.82 (0.62-1.09)    | 0.87 (0.57-1.34)    | 0.311         | 1.04 (0.74-1.46)            | 0.73 (0.53-1.00)           | 0.996         | 1.33 (0.80-2.21)    |
| >= 100                                                                           | 45     | 17160      | 0.97 (0.70-1.34)    | 0.89 (0.64-1.24)    | 0.90 (0.64-1.27)                        | 0.75 (0.50-1.12)    | 1.38 (0.78-2.46)    |               | 0.59 (0.30-1.17)            | 0.98 (0.67-1.45)           |               | 0.82 (0.32-2.12)    |
| p-trend                                                                          |        |            | 0.379               | 0.191               | 0.319                                   | 0.085               | 0.815               |               | 0.408                       | 0.276                      |               | 0.675               |
| <b>Mean BP (mmHg) (1/3SBP+2/3DBP) Cohort-specific quartiles</b>                  |        |            |                     |                     |                                         |                     |                     |               |                             |                            |               |                     |
| 50.0-88.3                                                                        | 100    | 76991      | 1 (referent)        | 1 (referent)        | 1 (referent)                            | 1 (referent)        | 1 (referent)        |               | 1 (referent)                | 1 (referent)               |               | 1 (referent)        |
| 88.5-96.6                                                                        | 149    | 77727      | 1.08 (0.84-1.39)    | 1.08 (0.84-1.40)    | 1.00 (0.77-1.31)                        | 1.08 (0.77-1.53)    | 1.12 (0.75-1.66)    |               | 1.03 (0.73-1.47)            | 1.10 (0.74-1.62)           |               | 1.01 (0.59-1.72)    |
| 96.8-105.5                                                                       | 163    | 76327      | 0.93 (0.72-1.20)    | 0.93 (0.72-1.21)    | 0.90 (0.69-1.17)                        | 0.95 (0.68-1.33)    | 0.93 (0.61-1.40)    | 0.516         | 1.11 (0.79-1.57)            | 0.78 (0.53-1.16)           | 0.288         | 1.17 (0.68-2.01)    |
| 105.6-216.6                                                                      | 201    | 76273      | 0.91 (0.71-1.17)    | 0.89 (0.68-1.15)    | 0.86 (0.66-1.12)                        | 0.84 (0.60-1.17)    | 1.01 (0.67-1.52)    |               | 0.94 (0.66-1.35)            | 0.81 (0.55-1.18)           |               | 1.02 (0.57-1.84)    |
| p-trend                                                                          |        |            | 0.218               | 0.145               | 0.16                                    | 0.108               | 0.794               |               | 0.832                       | 0.06                       |               | 0.809               |
| <b>Hypertension (SBP &gt;= 140 mmHg, or DBP &gt;= 90 mmHg, or self-reported)</b> |        |            |                     |                     |                                         |                     |                     |               |                             |                            |               |                     |
| Normotensive                                                                     | 286    | 174179     | 1 (referent)        | 1 (referent)        | 1 (referent)                            | 1 (referent)        | 1 (referent)        |               | 1 (referent)                | 1 (referent)               |               | 1 (referent)        |
| Hypertensive                                                                     | 327    | 133139     | 0.92 (0.78-1.09)    | 0.95 (0.80-1.13)    | 0.95 (0.80-1.14)                        | 0.92 (0.75-1.13)    | 1.02 (0.76-1.36)    | 0.781         | 1.00 (0.78-1.27)            | 0.91 (0.73-1.14)           | 0.666         | 1.44 (0.98-2.11)    |

| Age > 53 yrs                                                                                                              | Age           | Never smokers                                    | Ever smokers                                                                                                              | Smoking       | Alcohol <= 12g                                                                                                             | Alcohol > 12g                                                                                                             | Alcohol       | No antihypertensive treatment                                                                                             | Antihypertensive treatment                                                                                                | Treatment     |  | Lung SCC                                                                                                                      |
|---------------------------------------------------------------------------------------------------------------------------|---------------|--------------------------------------------------|---------------------------------------------------------------------------------------------------------------------------|---------------|----------------------------------------------------------------------------------------------------------------------------|---------------------------------------------------------------------------------------------------------------------------|---------------|---------------------------------------------------------------------------------------------------------------------------|---------------------------------------------------------------------------------------------------------------------------|---------------|--|-------------------------------------------------------------------------------------------------------------------------------|
| HR (adjusted)                                                                                                             | p-interaction | HR (adjusted)                                    | HR (adjusted)                                                                                                             | p-interaction | HR (adjusted)                                                                                                              | HR (adjusted)                                                                                                             | p-interaction | HR (adjusted)                                                                                                             | HR (adjusted)                                                                                                             | p-interaction |  |                                                                                                                               |
| 497<br>154015                                                                                                             |               | 17<br>141931                                     | 593<br>160623                                                                                                             |               | 339<br>205214                                                                                                              | 274<br>102104                                                                                                             |               | 397<br>227336                                                                                                             | 74<br>37017                                                                                                               |               |  | Cases<br>Cohort size                                                                                                          |
| 0.988 (0.942-1.035)                                                                                                       | 0.663         | 1.089 (0.831-1.426)                              | 0.985 (0.942-1.029)                                                                                                       | 0.699         | 0.956 (0.901-1.016)                                                                                                        | 1.023 (0.960-1.089)                                                                                                       | 0.116         | 0.954 (0.900-1.011)                                                                                                       | 1.136 (1.011-1.277)                                                                                                       | 0.006         |  | Mean Systolic Blood Pressure continuous (per 10mmHg increase)                                                                 |
| 0.955 (0.876-1.042)                                                                                                       | 0.504         | 1.361 (0.852-2.175)                              | 0.945 (0.872-1.024)                                                                                                       | 0.232         | 0.860 (0.772-0.959)                                                                                                        | 1.094 (0.975-1.227)                                                                                                       | 0.011         | 0.961 (0.866-1.066)                                                                                                       | 1.025 (0.804-1.306)                                                                                                       | 0.294         |  | Mean Diastolic Blood Pressure continuous (per 10mmHg increase)                                                                |
| 0.969 (0.901-1.042)                                                                                                       | 0.553         | 1.243 (0.827-1.868)                              | 0.961 (0.898-1.029)                                                                                                       | 0.384         | 0.898 (0.819-0.985)                                                                                                        | 1.062 (0.964-1.171)                                                                                                       | 0.026         | 0.945 (0.864-1.033)                                                                                                       | 1.141 (0.934-1.394)                                                                                                       | 0.038         |  | Mean Blood Pressure (1/3SBP+2/3DBP) continuous (per 10mmHg increase)                                                          |
| 1 (referent)<br>0.96 (0.70-1.31)<br>0.86 (0.63-1.18)<br>0.83 (0.62-1.11)<br>0.94 (0.67-1.33)<br>0.82 (0.49-1.38)<br>0.342 | 0.256         | two cases in referent<br>-<br>-<br>-<br>-<br>-   | 1 (referent)<br>0.98 (0.74-1.28)<br>0.85 (0.64-1.13)<br>0.90 (0.69-1.16)<br>0.94 (0.68-1.30)<br>0.81 (0.49-1.34)<br>0.381 | -             | 1 (referent)<br>0.84 (0.59-1.18)<br>0.84 (0.59-1.19)<br>0.82 (0.59-1.14)<br>0.83 (0.54-1.27)<br>0.41 (0.16-1.02)<br>0.129  | 1 (referent)<br>1.32 (0.85-2.05)<br>0.93 (0.58-1.47)<br>1.06 (0.69-1.60)<br>1.32 (0.81-2.14)<br>1.34 (0.70-2.56)<br>0.549 | 0.136         | 1 (referent)<br>1.05 (0.78-1.41)<br>0.81 (0.58-1.12)<br>0.90 (0.66-1.23)<br>0.88 (0.57-1.34)<br>0.52 (0.21-1.30)<br>0.156 | single case in referent<br>-<br>-<br>-<br>-<br>-<br>-                                                                     | -             |  | Systolic Blood Pressure (mmHg)<br>ESH classification<br>< 120<br>120-129<br>130-139<br>140-159<br>160-179<br>≥ 180<br>p-trend |
| 1 (referent)<br>0.94 (0.74-1.20)<br>0.88 (0.67-1.16)<br>0.76 (0.58-0.98)<br>0.86 (0.59-1.28)<br>1.07 (0.54-2.10)<br>0.096 | 0.257         | three cases in referent<br>-<br>-<br>-<br>-<br>- | 1 (referent)<br>0.89 (0.71-1.12)<br>0.86 (0.67-1.11)<br>0.80 (0.63-1.02)<br>0.78 (0.53-1.13)<br>0.91 (0.46-1.78)<br>0.059 | -             | 1 (referent)<br>0.77 (0.57-1.03)<br>0.83 (0.60-1.14)<br>0.56 (0.40-0.79)<br>0.60 (0.35-1.05)<br>0.50 (0.16-1.59)<br>0.0006 | 1 (referent)<br>1.27 (0.90-1.79)<br>1.02 (0.69-1.51)<br>1.32 (0.94-1.86)<br>1.34 (0.82-2.18)<br>1.72 (0.74-4.00)<br>0.106 | 0.002         | 1 (referent)<br>0.97 (0.75-1.26)<br>0.96 (0.70-1.29)<br>0.90 (0.67-1.22)<br>0.90 (0.52-1.54)<br>0.24 (0.03-1.76)<br>0.272 | 1 (referent)<br>0.64 (0.26-1.60)<br>0.71 (0.30-1.71)<br>0.71 (0.33-1.53)<br>0.80 (0.33-1.95)<br>1.17 (0.35-3.90)<br>0.948 | 0.28          |  | Diastolic Blood Pressure (mmHg)<br>ESH classification<br>< 80<br>80-84<br>85-89<br>90-99<br>100-109<br>≥ 110<br>p-trend       |
| 1 (referent)<br>0.91 (0.69-1.20)<br>0.83 (0.62-1.11)<br>0.92 (0.66-1.27)<br>0.497                                         | 0.169         | two cases in referent<br>-<br>-<br>-             | 1 (referent)<br>0.91 (0.72-1.16)<br>0.90 (0.69-1.17)<br>0.91 (0.67-1.24)<br>0.583                                         | -             | 1 (referent)<br>0.84 (0.62-1.14)<br>0.82 (0.59-1.14)<br>0.74 (0.49-1.11)<br>0.162                                          | 1 (referent)<br>1.11 (0.75-1.66)<br>1.07 (0.70-1.62)<br>1.34 (0.85-2.12)<br>0.28                                          | 0.079         | 1 (referent)<br>0.93 (0.71-1.22)<br>0.91 (0.67-1.24)<br>0.82 (0.54-1.23)<br>0.353                                         | single case in referent<br>-<br>-<br>-<br>-                                                                               | -             |  | Systolic Blood Pressure (mmHg)<br>ASH classification<br>< 120<br>120-139<br>140-159<br>≥ 160<br>p-trend                       |
| 1 (referent)<br>0.92 (0.74-1.13)<br>0.76 (0.58-0.98)<br>0.90 (0.64-1.29)<br>0.111                                         | 0.285         | three cases in referent<br>-<br>-<br>-<br>-      | 1 (referent)<br>0.88 (0.73-1.07)<br>0.80 (0.63-1.02)<br>0.80 (0.57-1.13)<br>0.057                                         | -             | 1 (referent)<br>0.79 (0.62-1.01)<br>0.56 (0.40-0.78)<br>0.58 (0.35-0.97)<br>0.0004                                         | 1 (referent)<br>1.16 (0.86-1.58)<br>1.33 (0.94-1.87)<br>1.41 (0.90-2.21)<br>0.064                                         | 0.0007        | 1 (referent)<br>0.96 (0.77-1.21)<br>0.90 (0.67-1.22)<br>0.77 (0.46-1.30)<br>0.304                                         | 1 (referent)<br>0.68 (0.31-1.47)<br>0.71 (0.33-1.53)<br>0.87 (0.38-2.01)<br>0.988                                         | 0.344         |  | Diastolic Blood Pressure (mmHg)<br>ASH classification<br>< 80<br>80-89<br>90-99<br>≥ 100<br>p-trend                           |
| 1 (referent)<br>1.11 (0.82-1.49)<br>0.88 (0.66-1.18)<br>0.86 (0.65-1.15)<br>0.087                                         | 0.309         | two cases in referent<br>-<br>-<br>-             | 1 (referent)<br>1.06 (0.81-1.37)<br>0.91 (0.70-1.18)<br>0.84 (0.65-1.09)<br>0.07                                          | -             | 1 (referent)<br>1.02 (0.74-1.41)<br>0.85 (0.61-1.18)<br>0.73 (0.52-1.02)<br>0.025                                          | 1 (referent)<br>1.18 (0.76-1.82)<br>1.06 (0.69-1.62)<br>1.12 (0.73-1.70)<br>0.837                                         | 0.167         | 1 (referent)<br>1.08 (0.80-1.46)<br>1.02 (0.75-1.37)<br>0.83 (0.60-1.14)<br>0.177                                         | two cases in referent<br>-<br>-<br>-                                                                                      | -             |  | Mean BP (mmHg) (1/3SBP+2/3DBP)<br>Cohort-specific quartiles<br>50.0-88.3<br>88.5-96.6<br>96.8-105.5<br>105.6-216.6<br>p-trend |
| 1 (referent)<br>0.86 (0.72-1.04)                                                                                          | 0.015         | 1 (referent)<br>1.59 (0.54-4.68)                 | 1 (referent)<br>0.91 (0.77-1.08)                                                                                          | 0.412         | 1 (referent)<br>0.85 (0.68-1.06)                                                                                           | 1 (referent)<br>1.08 (0.83-1.39)                                                                                          | 0.148         | -<br>1 (referent)                                                                                                         | -<br>1.06 (0.79-1.40)                                                                                                     |               |  | Hypertension (SBP ≥ 140 mmHg,<br>or DBP ≥ 90 mmHg, or self-reported)<br>Normotensive<br>Hypertensive                          |

| Lung SmallCC                                                                     |        | Excluding first 2 years of follow-up |                     |                     |                     | Men                 | Women               | Sex           | BMI <= 25 mg/m <sup>2</sup> | BMI > 25 mg/m <sup>2</sup> | BMI           | Age <= 53 yrs       |
|----------------------------------------------------------------------------------|--------|--------------------------------------|---------------------|---------------------|---------------------|---------------------|---------------------|---------------|-----------------------------|----------------------------|---------------|---------------------|
| Cases                                                                            | Cohort | HR (crude)                           | HR (adjusted)       | p-interaction | HR (adjusted)               | HR (adjusted)              | p-interaction | HR (adjusted)       |
| Cases                                                                            |        | 379                                  | 379                 | 349                 | 197                 | 182                 |                     |               | 155                         | 224                        |               | 96                  |
| Cohort size                                                                      |        | 307318                               | 307318              | 301857              | 112591              | 194727              |                     |               | 146326                      | 160992                     |               | 153303              |
| <b>Mean Systolic Blood Pressure continuous (per 10mmHg increase)</b>             | 379    | 307318                               | 1.050 (0.998-1.105) | 1.043 (0.990-1.099) | 1.027 (0.972-1.085) | 1.043 (0.966-1.126) | 1.038 (0.966-1.116) | 0.376         | 1.046 (0.963-1.135)         | 1.041 (0.973-1.114)        | 0.819         | 1.082 (0.963-1.215) |
| <b>Mean Diastolic Blood Pressure continuous (per 10mmHg increase)</b>            | 379    | 307318                               | 1.002 (0.910-1.102) | 0.992 (0.898-1.095) | 0.974 (0.878-1.080) | 0.973 (0.846-1.118) | 1.012 (0.877-1.167) | 0.501         | 0.970 (0.829-1.136)         | 1.014 (0.894-1.151)        | 0.856         | 0.964 (0.784-1.185) |
| <b>Mean Blood Pressure (1/3SBP+2/3DBP) continuous (per 10mmHg increase)</b>      | 379    | 307318                               | 1.041 (0.961-1.127) | 1.031 (0.949-1.120) | 1.009 (0.926-1.100) | 1.019 (0.906-1.147) | 1.038 (0.924-1.166) | 0.38          | 1.023 (0.898-1.165)         | 1.040 (0.936-1.156)        | 0.976         | 1.042 (0.873-1.243) |
| <b>Systolic Blood Pressure (mmHg) ESH classification</b>                         |        |                                      |                     |                     |                     |                     |                     |               |                             |                            |               |                     |
| < 120                                                                            | 70     | 86141                                | 1 (referent)        |               | 1 (referent)                | 1 (referent)               |               | 1 (referent)        |
| 120-129                                                                          | 61     | 66446                                | 0.89 (0.63-1.26)    | 0.91 (0.64-1.29)    | 0.83 (0.58-1.19)    | 0.80 (0.47-1.36)    | 0.98 (0.61-1.55)    |               | 1.03 (0.64-1.68)            | 0.76 (0.46-1.26)           |               | 0.68 (0.37-1.24)    |
| 130-139                                                                          | 74     | 57482                                | 1.07 (0.77-1.49)    | 1.08 (0.77-1.51)    | 1.06 (0.75-1.50)    | 1.02 (0.62-1.68)    | 1.08 (0.68-1.72)    |               | 1.16 (0.71-1.88)            | 0.95 (0.59-1.52)           |               | 0.74 (0.40-1.39)    |
| 140-159                                                                          | 119    | 68235                                | 1.18 (0.87-1.61)    | 1.18 (0.86-1.62)    | 1.12 (0.81-1.54)    | 1.16 (0.72-1.85)    | 1.12 (0.73-1.73)    | 0.754         | 1.00 (0.61-1.63)            | 1.22 (0.80-1.87)           | 0.929         | 0.99 (0.55-1.79)    |
| 160-179                                                                          | 37     | 22656                                | 1.05 (0.69-1.58)    | 1.03 (0.68-1.57)    | 0.82 (0.52-1.30)    | 0.96 (0.52-1.77)    | 1.05 (0.59-1.87)    |               | 1.33 (0.71-2.49)            | 0.86 (0.49-1.51)           |               | 0.83 (0.31-2.21)    |
| >= 180                                                                           | 18     | 6358                                 | 1.67 (0.98-2.84)    | 1.56 (0.91-2.68)    | 1.50 (0.86-2.62)    | 1.85 (0.89-3.86)    | 1.21 (0.53-2.79)    |               | 1.50 (0.57-3.95)            | 1.52 (0.78-2.96)           |               | 3.42 (1.14-10.26)   |
| p-trend                                                                          |        |                                      | 0.073               | 0.122               | 0.336               | 0.145               | 0.555               |               | 0.439                       | 0.171                      |               | 0.519               |
| <b>Diastolic Blood Pressure (mmHg) ESH classification</b>                        |        |                                      |                     |                     |                     |                     |                     |               |                             |                            |               |                     |
| < 80                                                                             | 154    | 132590                               | 1 (referent)        |               | 1 (referent)                | 1 (referent)               |               | 1 (referent)        |
| 80-84                                                                            | 68     | 64872                                | 0.82 (0.61-1.09)    | 0.83 (0.62-1.12)    | 0.77 (0.56-1.04)    | 0.72 (0.48-1.09)    | 0.94 (0.63-1.42)    |               | 0.68 (0.43-1.07)            | 0.97 (0.66-1.43)           |               | 1.05 (0.61-1.81)    |
| 85-89                                                                            | 62     | 41500                                | 1.03 (0.77-1.38)    | 1.05 (0.78-1.42)    | 1.08 (0.79-1.46)    | 0.99 (0.66-1.49)    | 1.07 (0.68-1.68)    |               | 0.67 (0.39-1.17)            | 1.34 (0.92-1.95)           |               | 1.15 (0.63-2.12)    |
| 90-99                                                                            | 67     | 51196                                | 0.94 (0.70-1.25)    | 0.90 (0.67-1.22)    | 0.84 (0.61-1.15)    | 0.68 (0.45-1.04)    | 1.24 (0.82-1.88)    | 0.216         | 0.98 (0.62-1.56)            | 0.92 (0.62-1.36)           | 0.417         | 0.79 (0.40-1.55)    |
| 100-109                                                                          | 24     | 13896                                | 1.21 (0.79-1.87)    | 1.17 (0.75-1.82)    | 1.08 (0.67-1.72)    | 1.21 (0.71-2.07)    | 0.90 (0.39-2.08)    |               | 0.65 (0.24-1.80)            | 1.54 (0.93-2.56)           |               | 1.74 (0.75-4.06)    |
| >= 110                                                                           | 4      | 3264                                 | 0.82 (0.30-2.21)    | 0.76 (0.28-2.08)    | 0.80 (0.29-2.17)    | 0.52 (0.13-2.15)    | 1.24 (0.30-5.12)    |               | 0.77 (0.11-5.58)            | 0.87 (0.27-2.77)           |               | no cases            |
| p-trend                                                                          |        |                                      | 0.798               | 1                   | 0.752               | 0.501               | 0.476               |               | 0.398                       | 0.433                      |               | 0.955               |
| <b>Systolic Blood Pressure (mmHg) ASH classification</b>                         |        |                                      |                     |                     |                     |                     |                     |               |                             |                            |               |                     |
| < 120                                                                            | 70     | 86141                                | 1 (referent)        |               | 1 (referent)                | 1 (referent)               |               | 1 (referent)        |
| 120-139                                                                          | 135    | 123928                               | 0.98 (0.73-1.31)    | 0.99 (0.73-1.33)    | 0.94 (0.69-1.27)    | 0.91 (0.58-1.43)    | 1.02 (0.69-1.52)    |               | 1.09 (0.72-1.65)            | 0.86 (0.56-1.31)           |               | 0.70 (0.43-1.17)    |
| 140-159                                                                          | 119    | 68235                                | 1.18 (0.87-1.60)    | 1.17 (0.85-1.60)    | 1.10 (0.80-1.53)    | 1.15 (0.72-1.83)    | 1.12 (0.73-1.73)    | 0.615         | 1.00 (0.61-1.63)            | 1.21 (0.79-1.86)           | 0.926         | 0.98 (0.54-1.77)    |
| >= 160                                                                           | 55     | 29014                                | 1.18 (0.82-1.71)    | 1.15 (0.79-1.68)    | 0.98 (0.65-1.46)    | 1.15 (0.66-1.99)    | 1.08 (0.64-1.84)    |               | 1.36 (0.76-2.43)            | 1.02 (0.62-1.68)           |               | 1.23 (0.56-2.72)    |
| p-trend                                                                          |        |                                      | 0.162               | 0.245               | 0.7                 | 0.305               | 0.64                |               | 0.481                       | 0.337                      |               | 0.681               |
| <b>Diastolic Blood Pressure (mmHg) ASH classification</b>                        |        |                                      |                     |                     |                     |                     |                     |               |                             |                            |               |                     |
| < 80                                                                             | 154    | 132590                               | 1 (referent)        |               | 1 (referent)                | 1 (referent)               |               | 1 (referent)        |
| 80-89                                                                            | 130    | 106372                               | 0.91 (0.72-1.15)    | 0.92 (0.73-1.17)    | 0.90 (0.70-1.15)    | 0.84 (0.60-1.18)    | 0.99 (0.70-1.40)    |               | 0.68 (0.46-1.00)            | 1.13 (0.82-1.56)           |               | 1.09 (0.69-1.74)    |
| 90-99                                                                            | 67     | 51196                                | 0.94 (0.70-1.25)    | 0.90 (0.67-1.22)    | 0.84 (0.61-1.15)    | 0.68 (0.44-1.04)    | 1.24 (0.81-1.88)    | 0.221         | 0.98 (0.62-1.56)            | 0.92 (0.62-1.36)           | 0.441         | 0.79 (0.40-1.55)    |
| >= 100                                                                           | 28     | 17160                                | 1.13 (0.75-1.70)    | 1.08 (0.71-1.64)    | 1.01 (0.65-1.57)    | 1.07 (0.64-1.79)    | 0.96 (0.46-2.01)    |               | 0.67 (0.27-1.67)            | 1.39 (0.86-2.26)           |               | 1.45 (0.62-3.37)    |
| p-trend                                                                          |        |                                      | 0.958               | 0.839               | 0.505               | 0.419               | 0.578               |               | 0.337                       | 0.539                      |               | 0.871               |
| <b>Mean BP (mmHg) (1/3SBP+2/3DBP) Cohort-specific quartiles</b>                  |        |                                      |                     |                     |                     |                     |                     |               |                             |                            |               |                     |
| 50.0-88.3                                                                        | 68     | 76991                                | 1 (referent)        |               | 1 (referent)                | 1 (referent)               |               | 1 (referent)        |
| 88.5-96.6                                                                        | 76     | 77727                                | 0.91 (0.65-1.26)    | 0.93 (0.67-1.30)    | 0.84 (0.60-1.19)    | 1.01 (0.60-1.69)    | 0.84 (0.54-1.31)    |               | 0.84 (0.54-1.33)            | 1.07 (0.65-1.77)           |               | 0.83 (0.46-1.49)    |
| 96.8-105.5                                                                       | 110    | 76327                                | 1.07 (0.78-1.45)    | 1.10 (0.80-1.51)    | 1.04 (0.75-1.43)    | 1.25 (0.77-2.04)    | 0.94 (0.61-1.45)    | 0.394         | 0.93 (0.59-1.45)            | 1.30 (0.82-2.07)           | 0.553         | 1.11 (0.62-1.97)    |
| 105.6-216.6                                                                      | 125    | 76273                                | 1.07 (0.79-1.45)    | 1.05 (0.76-1.45)    | 0.95 (0.69-1.32)    | 1.03 (0.63-1.70)    | 1.09 (0.72-1.66)    |               | 0.94 (0.59-1.50)            | 1.23 (0.77-1.95)           |               | 1.04 (0.56-1.95)    |
| p-trend                                                                          |        |                                      | 0.414               | 0.524               | 0.876               | 0.825               | 0.565               |               | 0.889                       | 0.308                      |               | 0.678               |
| <b>Hypertension (SBP &gt;= 140 mmHg, or DBP &gt;= 90 mmHg, or self-reported)</b> |        |                                      |                     |                     |                     |                     |                     |               |                             |                            |               |                     |
| Normotensive                                                                     | 165    | 174179                               | 1 (referent)        |               | 1 (referent)                | 1 (referent)               |               | 1 (referent)        |
| Hypertensive                                                                     | 214    | 133139                               | 1.22 (0.99-1.50)    | 1.25 (1.01-1.55)    | 1.15 (0.92-1.44)    | 1.30 (0.96-1.76)    | 1.20 (0.88-1.63)    | 0.834         | 1.09 (0.78-1.51)            | 1.41 (1.06-1.88)           | 0.371         | 1.15 (0.75-1.77)    |





| Lung Other                                                                       |        |            |                     |                     | Excluding first<br>2 years of follow-up | Men                 | Women               | Sex           | BMI <= 25 mg/m <sup>2</sup> | BMI > 25 mg/m <sup>2</sup> | BMI           | Age <= 53 yrs       |
|----------------------------------------------------------------------------------|--------|------------|---------------------|---------------------|-----------------------------------------|---------------------|---------------------|---------------|-----------------------------|----------------------------|---------------|---------------------|
| Cases                                                                            | Cohort | HR (crude) | HR (adjusted)       | HR (adjusted)       | HR (adjusted)                           | HR (adjusted)       | HR (adjusted)       | p-interaction | HR (adjusted)               | HR (adjusted)              | p-interaction | HR (adjusted)       |
| Cases                                                                            |        | 1107       | 1107                | 1023                | 595                                     | 512                 |                     |               | 547                         | 560                        |               | 253                 |
| Cohort size                                                                      |        | 307318     | 307318              | 301857              | 112591                                  | 194727              |                     |               | 146326                      | 160992                     |               | 153303              |
| <b>Mean Systolic Blood Pressure continuous (per 10mmHg increase)</b>             | 1107   | 307318     | 1.042 (1.011-1.075) | 1.057 (1.025-1.091) | 1.056 (1.022-1.091)                     | 1.049 (1.004-1.096) | 1.070 (1.023-1.119) | 0.776         | 1.046 (1.000-1.093)         | 1.066 (1.021-1.114)        | 0.498         | 1.052 (0.976-1.134) |
| <b>Mean Diastolic Blood Pressure continuous (per 10mmHg increase)</b>            | 1107   | 307318     | 1.014 (0.958-1.074) | 1.045 (0.986-1.108) | 1.044 (0.983-1.109)                     | 1.019 (0.942-1.103) | 1.087 (0.997-1.185) | 0.331         | 1.034 (0.950-1.125)         | 1.046 (0.966-1.134)        | 0.83          | 1.162 (1.026-1.316) |
| <b>Mean Blood Pressure (1/3SBP+2/3DBP) continuous (per 10mmHg increase)</b>      | 1107   | 307318     | 1.040 (0.992-1.091) | 1.068 (1.017-1.121) | 1.067 (1.014-1.122)                     | 1.048 (0.979-1.121) | 1.099 (1.024-1.180) | 0.475         | 1.053 (0.982-1.130)         | 1.076 (1.005-1.151)        | 0.631         | 1.119 (1.003-1.247) |
| <b>Systolic Blood Pressure (mmHg) ESH classification</b>                         |        |            |                     |                     |                                         |                     |                     |               |                             |                            |               |                     |
| < 120                                                                            | 172    | 86141      | 1 (referent)        | 1 (referent)        | 1 (referent)                            | 1 (referent)        | 1 (referent)        |               | 1 (referent)                | 1 (referent)               |               | 1 (referent)        |
| 120-129                                                                          | 189    | 66446      | 1.04 (0.85-1.28)    | 1.08 (0.88-1.34)    | 1.08 (0.87-1.34)                        | 1.16 (0.85-1.60)    | 1.04 (0.78-1.38)    |               | 1.07 (0.82-1.41)            | 1.06 (0.76-1.48)           |               | 0.97 (0.68-1.38)    |
| 130-139                                                                          | 233    | 57482      | 1.23 (1.01-1.51)    | 1.30 (1.06-1.59)    | 1.26 (1.02-1.56)                        | 1.34 (0.98-1.82)    | 1.30 (0.99-1.73)    |               | 1.23 (0.94-1.61)            | 1.34 (0.97-1.84)           |               | 1.23 (0.86-1.76)    |
| 140-159                                                                          | 326    | 68235      | 1.14 (0.94-1.38)    | 1.24 (1.02-1.51)    | 1.27 (1.04-1.56)                        | 1.32 (0.98-1.78)    | 1.19 (0.91-1.57)    | 0.993         | 1.33 (1.03-1.73)            | 1.15 (0.85-1.57)           | 0.617         | 1.02 (0.69-1.51)    |
| 160-179                                                                          | 142    | 22656      | 1.30 (1.03-1.64)    | 1.45 (1.14-1.84)    | 1.38 (1.08-1.78)                        | 1.38 (0.97-1.95)    | 1.62 (1.16-2.26)    |               | 1.29 (0.91-1.83)            | 1.51 (1.06-2.13)           |               | 1.35 (0.75-2.40)    |
| >= 180                                                                           | 45     | 6358       | 1.40 (1.00-1.96)    | 1.50 (1.06-2.11)    | 1.45 (1.01-2.08)                        | 1.65 (1.03-2.64)    | 1.41 (0.84-2.38)    |               | 1.12 (0.62-2.03)            | 1.74 (1.11-2.72)           |               | 0.88 (0.21-3.65)    |
| p-trend                                                                          |        |            | 0.012               | 0.0007              | 0.002                                   | 0.023               | 0.008               |               | 0.037                       | 0.008                      |               | 0.45                |
| <b>Diastolic Blood Pressure (mmHg) ESH classification</b>                        |        |            |                     |                     |                                         |                     |                     |               |                             |                            |               |                     |
| < 80                                                                             | 391    | 132590     | 1 (referent)        | 1 (referent)        | 1 (referent)                            | 1 (referent)        | 1 (referent)        |               | 1 (referent)                | 1 (referent)               |               | 1 (referent)        |
| 80-84                                                                            | 225    | 64872      | 0.92 (0.78-1.08)    | 0.97 (0.82-1.15)    | 0.98 (0.83-1.17)                        | 1.00 (0.79-1.26)    | 0.95 (0.74-1.21)    |               | 0.92 (0.73-1.16)            | 1.02 (0.80-1.30)           |               | 1.14 (0.81-1.60)    |
| 85-89                                                                            | 173    | 41500      | 1.04 (0.87-1.25)    | 1.13 (0.94-1.35)    | 1.15 (0.96-1.40)                        | 1.15 (0.89-1.47)    | 1.12 (0.85-1.47)    |               | 1.17 (0.90-1.51)            | 1.08 (0.83-1.40)           |               | 1.54 (1.06-2.23)    |
| 90-99                                                                            | 233    | 51196      | 1.02 (0.87-1.21)    | 1.12 (0.94-1.32)    | 1.11 (0.93-1.33)                        | 1.09 (0.87-1.37)    | 1.17 (0.91-1.51)    | 0.446         | 1.14 (0.89-1.45)            | 1.09 (0.86-1.38)           | 0.87          | 1.37 (0.94-1.99)    |
| 100-109                                                                          | 72     | 13896      | 1.12 (0.87-1.44)    | 1.19 (0.92-1.54)    | 1.20 (0.91-1.57)                        | 1.02 (0.72-1.45)    | 1.58 (1.08-2.33)    |               | 0.93 (0.59-1.48)            | 1.34 (0.97-1.85)           |               | 1.29 (0.68-2.47)    |
| >= 110                                                                           | 13     | 3264       | 0.90 (0.52-1.57)    | 0.95 (0.54-1.66)    | 0.95 (0.53-1.70)                        | 1.12 (0.60-2.08)    | 0.51 (0.13-2.05)    |               | 0.98 (0.36-2.64)            | 0.94 (0.48-1.85)           |               | 1.06 (0.26-4.35)    |
| p-trend                                                                          |        |            | 0.438               | 0.094               | 0.105                                   | 0.434               | 0.065               |               | 0.36                        | 0.194                      |               | 0.061               |
| <b>Systolic Blood Pressure (mmHg) ASH classification</b>                         |        |            |                     |                     |                                         |                     |                     |               |                             |                            |               |                     |
| < 120                                                                            | 172    | 86141      | 1 (referent)        | 1 (referent)        | 1 (referent)                            | 1 (referent)        | 1 (referent)        |               | 1 (referent)                | 1 (referent)               |               | 1 (referent)        |
| 120-139                                                                          | 422    | 123928     | 1.14 (0.95-1.36)    | 1.19 (0.99-1.43)    | 1.17 (0.96-1.41)                        | 1.25 (0.94-1.67)    | 1.16 (0.91-1.48)    |               | 1.14 (0.91-1.45)            | 1.20 (0.90-1.62)           |               | 1.08 (0.80-1.46)    |
| 140-159                                                                          | 326    | 68235      | 1.14 (0.93-1.38)    | 1.23 (1.01-1.50)    | 1.26 (1.03-1.55)                        | 1.31 (0.97-1.77)    | 1.19 (0.90-1.56)    | 0.913         | 1.33 (1.03-1.72)            | 1.14 (0.84-1.56)           | 0.738         | 1.01 (0.68-1.50)    |
| >= 160                                                                           | 187    | 29014      | 1.31 (1.05-1.64)    | 1.45 (1.15-1.81)    | 1.39 (1.10-1.76)                        | 1.43 (1.02-1.99)    | 1.56 (1.14-2.13)    |               | 1.25 (0.90-1.73)            | 1.55 (1.11-2.15)           |               | 1.25 (0.72-2.18)    |
| p-trend                                                                          |        |            | 0.03                | 0.002               | 0.005                                   | 0.051               | 0.012               |               | 0.055                       | 0.021                      |               | 0.606               |
| <b>Diastolic Blood Pressure (mmHg) ASH classification</b>                        |        |            |                     |                     |                                         |                     |                     |               |                             |                            |               |                     |
| < 80                                                                             | 391    | 132590     | 1 (referent)        | 1 (referent)        | 1 (referent)                            | 1 (referent)        | 1 (referent)        |               | 1 (referent)                | 1 (referent)               |               | 1 (referent)        |
| 80-89                                                                            | 398    | 106372     | 0.97 (0.84-1.11)    | 1.04 (0.90-1.20)    | 1.05 (0.91-1.22)                        | 1.06 (0.86-1.30)    | 1.01 (0.82-1.24)    |               | 1.01 (0.83-1.23)            | 1.04 (0.84-1.29)           |               | 1.28 (0.96-1.72)    |
| 90-99                                                                            | 233    | 51196      | 1.02 (0.87-1.21)    | 1.11 (0.94-1.32)    | 1.11 (0.93-1.33)                        | 1.09 (0.86-1.37)    | 1.17 (0.91-1.51)    | 0.386         | 1.14 (0.89-1.45)            | 1.09 (0.86-1.38)           | 0.617         | 1.36 (0.94-1.98)    |
| >= 100                                                                           | 85     | 17160      | 1.08 (0.85-1.37)    | 1.14 (0.90-1.46)    | 1.15 (0.89-1.48)                        | 1.04 (0.75-1.43)    | 1.40 (0.96-2.04)    |               | 0.94 (0.61-1.44)            | 1.26 (0.93-1.71)           |               | 1.24 (0.68-2.27)    |
| p-trend                                                                          |        |            | 0.572               | 0.15                | 0.17                                    | 0.6                 | 0.075               |               | 0.62                        | 0.166                      |               | 0.113               |
| <b>Mean BP (mmHg) (1/3SBP+2/3DBP) Cohort-specific quartiles</b>                  |        |            |                     |                     |                                         |                     |                     |               |                             |                            |               |                     |
| 50.0-88.3                                                                        | 167    | 76991      | 1 (referent)        | 1 (referent)        | 1 (referent)                            | 1 (referent)        | 1 (referent)        |               | 1 (referent)                | 1 (referent)               |               | 1 (referent)        |
| 88.5-96.6                                                                        | 243    | 77727      | 1.05 (0.86-1.29)    | 1.12 (0.91-1.37)    | 1.07 (0.87-1.32)                        | 1.05 (0.77-1.43)    | 1.20 (0.92-1.57)    |               | 1.04 (0.81-1.34)            | 1.19 (0.85-1.66)           |               | 1.04 (0.72-1.49)    |
| 96.8-105.5                                                                       | 303    | 76327      | 1.09 (0.90-1.33)    | 1.20 (0.99-1.46)    | 1.21 (0.99-1.48)                        | 1.29 (0.96-1.72)    | 1.12 (0.85-1.47)    | 0.831         | 1.18 (0.92-1.52)            | 1.22 (0.89-1.68)           | 0.923         | 1.43 (1.00-2.05)    |
| 105.6-216.6                                                                      | 394    | 76273      | 1.16 (0.96-1.41)    | 1.31 (1.08-1.59)    | 1.28 (1.05-1.57)                        | 1.25 (0.93-1.67)    | 1.43 (1.09-1.87)    |               | 1.26 (0.97-1.63)            | 1.34 (0.98-1.83)           |               | 1.33 (0.89-1.97)    |
| p-trend                                                                          |        |            | 0.091               | 0.004               | 0.007                                   | 0.066               | 0.018               |               | 0.046                       | 0.063                      |               | 0.058               |
| <b>Hypertension (SBP &gt;= 140 mmHg, or DBP &gt;= 90 mmHg, or self-reported)</b> |        |            |                     |                     |                                         |                     |                     |               |                             |                            |               |                     |
| Normotensive                                                                     | 514    | 174179     | 1 (referent)        | 1 (referent)        | 1 (referent)                            | 1 (referent)        | 1 (referent)        |               | 1 (referent)                | 1 (referent)               |               | 1 (referent)        |
| Hypertensive                                                                     | 593    | 133139     | 0.95 (0.84-1.08)    | 1.04 (0.91-1.17)    | 1.05 (0.92-1.20)                        | 1.04 (0.87-1.23)    | 1.05 (0.87-1.26)    | 0.756         | 1.06 (0.89-1.27)            | 1.01 (0.84-1.20)           | 0.824         | 1.03 (0.78-1.35)    |

| Age > 53 yrs                                                                                                               | Age           | Never smokers                                                                                                             | Ever smokers                                                                                                              | Smoking       | Alcohol <= 12g                                                                                                            | Alcohol > 12g                                                                                                             | Alcohol       | No antihypertensive treatment                                                                                              | Antihypertensive treatment                                                                                                | Treatment     |  | Lung Other                                                                                                                  |
|----------------------------------------------------------------------------------------------------------------------------|---------------|---------------------------------------------------------------------------------------------------------------------------|---------------------------------------------------------------------------------------------------------------------------|---------------|---------------------------------------------------------------------------------------------------------------------------|---------------------------------------------------------------------------------------------------------------------------|---------------|----------------------------------------------------------------------------------------------------------------------------|---------------------------------------------------------------------------------------------------------------------------|---------------|--|-----------------------------------------------------------------------------------------------------------------------------|
| HR (adjusted)                                                                                                              | p-interaction | HR (adjusted)                                                                                                             | HR (adjusted)                                                                                                             | p-interaction | HR (adjusted)                                                                                                             | HR (adjusted)                                                                                                             | p-interaction | HR (adjusted)                                                                                                              | HR (adjusted)                                                                                                             | p-interaction |  |                                                                                                                             |
| 854<br>154015                                                                                                              |               | 110<br>141931                                                                                                             | 986<br>160623                                                                                                             |               | 662<br>205214                                                                                                             | 445<br>102104                                                                                                             |               | 749<br>227336                                                                                                              | 141<br>37017                                                                                                              |               |  | Cases<br>Cohort size                                                                                                        |
| 1.060 (1.024-1.097)                                                                                                        | 0.868         | 1.129 (1.024-1.245)                                                                                                       | 1.049 (1.014-1.084)                                                                                                       | 0.196         | 1.063 (1.020-1.107)                                                                                                       | 1.050 (1.000-1.103)                                                                                                       | 0.967         | 1.088 (1.045-1.132)                                                                                                        | 1.071 (0.984-1.167)                                                                                                       | 0.615         |  | Mean Systolic Blood Pressure continuous (per 10mmHg increase)                                                               |
| 1.016 (0.952-1.086)                                                                                                        | 0.109         | 1.067 (0.885-1.286)                                                                                                       | 1.027 (0.965-1.092)                                                                                                       | 0.556         | 1.054 (0.977-1.136)                                                                                                       | 1.024 (0.934-1.123)                                                                                                       | 0.516         | 1.083 (1.005-1.167)                                                                                                        | 0.980 (0.829-1.159)                                                                                                       | 0.239         |  | Mean Diastolic Blood Pressure continuous (per 10mmHg increase)                                                              |
| 1.057 (1.001-1.117)                                                                                                        | 0.443         | 1.140 (0.976-1.332)                                                                                                       | 1.052 (0.999-1.108)                                                                                                       | 0.303         | 1.076 (1.010-1.147)                                                                                                       | 1.053 (0.974-1.137)                                                                                                       | 0.711         | 1.113 (1.045-1.185)                                                                                                        | 1.054 (0.915-1.214)                                                                                                       | 0.392         |  | Mean Blood Pressure (1/3SBP+2/3DBP) continuous (per 10mmHg increase)                                                        |
| 1 (referent)<br>1.17 (0.89-1.52)<br>1.38 (1.07-1.78)<br>1.35 (1.06-1.73)<br>1.55 (1.17-2.05)<br>1.67 (1.15-2.42)<br>0.0005 | 0.402         | 1 (referent)<br>1.14 (0.55-2.37)<br>1.62 (0.81-3.21)<br>1.43 (0.72-2.81)<br>2.33 (1.10-4.92)<br>2.01 (0.68-5.93)<br>0.032 | 1 (referent)<br>1.06 (0.85-1.32)<br>1.28 (1.03-1.59)<br>1.21 (0.98-1.49)<br>1.34 (1.04-1.73)<br>1.47 (1.02-2.12)<br>0.006 | 0.263         | 1 (referent)<br>1.14 (0.88-1.48)<br>1.27 (0.98-1.65)<br>1.28 (1.00-1.65)<br>1.54 (1.14-2.10)<br>1.48 (0.93-2.36)<br>0.004 | 1 (referent)<br>0.99 (0.70-1.41)<br>1.32 (0.95-1.85)<br>1.14 (0.82-1.58)<br>1.30 (0.88-1.91)<br>1.53 (0.92-2.56)<br>0.076 | 0.896         | 1 (referent)<br>1.09 (0.86-1.39)<br>1.46 (1.16-1.85)<br>1.27 (1.01-1.61)<br>1.65 (1.23-2.22)<br>1.84 (1.15-2.94)<br>0.0002 | 1 (referent)<br>0.48 (0.19-1.24)<br>0.46 (0.19-1.09)<br>0.67 (0.32-1.41)<br>0.80 (0.37-1.72)<br>1.11 (0.48-2.58)<br>0.097 | 0.944         |  | Systolic Blood Pressure (mmHg) ESH classification<br>< 120<br>120-129<br>130-139<br>140-159<br>160-179<br>>= 180<br>p-trend |
| 1 (referent)<br>0.93 (0.77-1.12)<br>1.03 (0.83-1.27)<br>1.06 (0.87-1.28)<br>1.15 (0.87-1.53)<br>0.92 (0.50-1.68)<br>0.333  | 0.29          | 1 (referent)<br>0.85 (0.50-1.44)<br>0.58 (0.29-1.18)<br>1.01 (0.59-1.72)<br>2.05 (1.08-3.89)<br>0.72 (0.10-5.29)<br>0.306 | 1 (referent)<br>0.98 (0.82-1.17)<br>1.17 (0.97-1.42)<br>1.09 (0.91-1.31)<br>1.03 (0.77-1.37)<br>0.95 (0.53-1.70)<br>0.316 | 0.398         | 1 (referent)<br>1.04 (0.84-1.29)<br>1.14 (0.90-1.46)<br>1.22 (0.98-1.52)<br>1.22 (0.86-1.74)<br>0.98 (0.46-2.08)<br>0.073 | 1 (referent)<br>0.86 (0.65-1.12)<br>1.09 (0.82-1.45)<br>0.96 (0.73-1.25)<br>1.14 (0.77-1.68)<br>0.81 (0.34-1.90)<br>0.729 | 0.28          | 1 (referent)<br>0.91 (0.75-1.11)<br>1.26 (1.01-1.56)<br>1.12 (0.90-1.39)<br>1.50 (1.07-2.10)<br>0.54 (0.17-1.71)<br>0.037  | 1 (referent)<br>0.71 (0.39-1.28)<br>0.74 (0.40-1.37)<br>0.97 (0.58-1.60)<br>0.82 (0.43-1.54)<br>0.99 (0.37-2.65)<br>0.845 | 0.419         |  | Diastolic Blood Pressure (mmHg) ESH classification<br>< 80<br>80-84<br>85-89<br>90-99<br>100-109<br>>= 110<br>p-trend       |
| 1 (referent)<br>1.28 (1.01-1.61)<br>1.35 (1.06-1.72)<br>1.57 (1.21-2.05)<br>0.001                                          | 0.378         | 1 (referent)<br>1.38 (0.73-2.59)<br>1.41 (0.72-2.78)<br>2.22 (1.08-4.59)<br>0.039                                         | 1 (referent)<br>1.17 (0.96-1.41)<br>1.20 (0.97-1.48)<br>1.36 (1.07-1.73)<br>0.018                                         | 0.251         | 1 (referent)<br>1.20 (0.95-1.51)<br>1.28 (0.99-1.65)<br>1.52 (1.14-2.04)<br>0.005                                         | 1 (referent)<br>1.16 (0.86-1.57)<br>1.13 (0.82-1.56)<br>1.34 (0.93-1.92)<br>0.189                                         | 0.663         | 1 (referent)<br>1.26 (1.03-1.55)<br>1.26 (0.99-1.59)<br>1.66 (1.26-2.20)<br>0.002                                          | 1 (referent)<br>0.47 (0.21-1.04)<br>0.67 (0.32-1.41)<br>0.88 (0.42-1.85)<br>0.113                                         | 0.853         |  | Systolic Blood Pressure (mmHg) ASH classification<br>< 120<br>120-139<br>140-159<br>>= 160<br>p-trend                       |
| 1 (referent)<br>0.97 (0.82-1.14)<br>1.05 (0.87-1.28)<br>1.11 (0.85-1.45)<br>0.394                                          | 0.38          | 1 (referent)<br>0.74 (0.46-1.20)<br>1.01 (0.59-1.72)<br>1.82 (0.98-3.41)<br>0.155                                         | 1 (referent)<br>1.06 (0.91-1.23)<br>1.09 (0.91-1.31)<br>1.01 (0.78-1.32)<br>0.536                                         | 0.191         | 1 (referent)<br>1.08 (0.90-1.30)<br>1.22 (0.98-1.52)<br>1.17 (0.85-1.63)<br>0.089                                         | 1 (referent)<br>0.95 (0.76-1.20)<br>0.96 (0.73-1.25)<br>1.07 (0.75-1.55)<br>0.926                                         | 0.219         | 1 (referent)<br>1.04 (0.88-1.23)<br>1.12 (0.90-1.38)<br>1.33 (0.96-1.85)<br>0.1                                            | 1 (referent)<br>0.72 (0.43-1.21)<br>0.97 (0.58-1.60)<br>0.85 (0.46-1.54)<br>0.927                                         | 0.5           |  | Diastolic Blood Pressure (mmHg) ASH classification<br>< 80<br>80-89<br>90-99<br>>= 100<br>p-trend                           |
| 1 (referent)<br>1.15 (0.90-1.47)<br>1.15 (0.91-1.46)<br>1.30 (1.04-1.64)<br>0.024                                          | 0.638         | 1 (referent)<br>1.27 (0.65-2.48)<br>1.19 (0.61-2.31)<br>1.51 (0.79-2.89)<br>0.24                                          | 1 (referent)<br>1.08 (0.87-1.34)<br>1.18 (0.96-1.45)<br>1.25 (1.01-1.53)<br>0.023                                         | 0.579         | 1 (referent)<br>1.17 (0.91-1.50)<br>1.17 (0.92-1.50)<br>1.33 (1.04-1.70)<br>0.033                                         | 1 (referent)<br>1.01 (0.72-1.43)<br>1.21 (0.87-1.68)<br>1.25 (0.91-1.74)<br>0.078                                         | 0.948         | 1 (referent)<br>1.14 (0.91-1.43)<br>1.31 (1.05-1.65)<br>1.44 (1.14-1.82)<br>0.001                                          | 1 (referent)<br>0.64 (0.27-1.52)<br>0.57 (0.26-1.24)<br>0.77 (0.37-1.59)<br>0.787                                         | 0.372         |  | Mean BP (mmHg) (1/3SBP+2/3DBP) Cohort-specific quartiles<br>50.0-88.3<br>88.5-96.6<br>96.8-105.5<br>105.6-216.6<br>p-trend  |
| 1 (referent)<br>1.04 (0.90-1.20)                                                                                           | 0.985         | 1 (referent)<br>1.10 (0.73-1.65)                                                                                          | 1 (referent)<br>1.00 (0.87-1.14)                                                                                          | 0.589         | 1 (referent)<br>1.06 (0.90-1.24)                                                                                          | 1 (referent)<br>1.00 (0.82-1.22)                                                                                          | 0.754         | -<br>1 (referent)                                                                                                          | -<br>0.93 (0.76-1.15)                                                                                                     |               |  | Hypertension (SBP >= 140 mmHg, or DBP >= 90 mmHg, or self-reported)<br>Normotensive<br>Hypertensive                         |

| Kidney                                                                           |        | Excluding first 2 years of follow-up |                     |                     | Men                 | Women               | Sex              | BMI <= 25 mg/m <sup>2</sup> | BMI > 25 mg/m <sup>2</sup> | BMI           | Age <= 53 yrs       |
|----------------------------------------------------------------------------------|--------|--------------------------------------|---------------------|---------------------|---------------------|---------------------|------------------|-----------------------------|----------------------------|---------------|---------------------|
| Cases                                                                            | Cohort | HR (crude)                           | HR (adjusted)       | HR (adjusted)       | HR (adjusted)       | HR (adjusted)       | p-interaction    | HR (adjusted)               | HR (adjusted)              | p-interaction | HR (adjusted)       |
| <b>Cases</b>                                                                     |        | 758                                  | 758                 | 666                 | 431                 | 327                 |                  | 270                         | 488                        |               | 223                 |
| <b>Cohort size</b>                                                               |        | 307318                               | 307318              | 301857              | 112591              | 194727              |                  | 146326                      | 160992                     |               | 153303              |
| <b>Mean Systolic Blood Pressure continuous (per 10mmHg increase)</b>             |        |                                      |                     |                     |                     |                     |                  |                             |                            |               |                     |
| 758                                                                              | 307318 | 1.150 (1.109-1.192)                  | 1.120 (1.079-1.164) | 1.109 (1.065-1.156) | 1.106 (1.050-1.165) | 1.132 (1.071-1.197) | 0.66             | 1.103 (1.034-1.178)         | 1.139 (1.088-1.193)        | 0.476         | 1.172 (1.085-1.265) |
| <b>Mean Diastolic Blood Pressure continuous (per 10mmHg increase)</b>            |        |                                      |                     |                     |                     |                     |                  |                             |                            |               |                     |
| 758                                                                              | 307318 | 1.298 (1.218-1.384)                  | 1.221 (1.141-1.307) | 1.216 (1.131-1.308) | 1.213 (1.107-1.329) | 1.230 (1.109-1.363) | 0.907            | 1.202 (1.069-1.353)         | 1.250 (1.153-1.356)        | 0.525         | 1.330 (1.172-1.509) |
| <b>Mean Blood Pressure (1/3SBP+2/3DBP) continuous (per 10mmHg increase)</b>      |        |                                      |                     |                     |                     |                     |                  |                             |                            |               |                     |
| 758                                                                              | 307318 | 1.263 (1.196-1.334)                  | 1.204 (1.136-1.276) | 1.193 (1.121-1.269) | 1.188 (1.098-1.285) | 1.219 (1.118-1.329) | 0.852            | 1.179 (1.067-1.302)         | 1.234 (1.151-1.324)        | 0.442         | 1.293 (1.158-1.444) |
| <b>Systolic Blood Pressure (mmHg) ESH classification</b>                         |        |                                      |                     |                     |                     |                     |                  |                             |                            |               |                     |
| < 120                                                                            | 86141  | 1 (referent)                         | 1 (referent)        | 1 (referent)        | 1 (referent)        | 1 (referent)        |                  | 1 (referent)                | 1 (referent)               |               | 1 (referent)        |
| 120-129                                                                          | 132    | 66446                                | 1.42 (1.09-1.85)    | 1.28 (0.98-1.67)    | 1.23 (0.93-1.63)    | 1.34 (0.91-1.98)    | 1.21 (0.83-1.77) | 1.37 (0.93-2.02)            | 1.22 (0.84-1.77)           |               | 1.41 (0.94-2.12)    |
| 130-139                                                                          | 156    | 57482                                | 1.72 (1.33-2.23)    | 1.48 (1.14-1.93)    | 1.48 (1.13-1.96)    | 1.63 (1.12-2.38)    | 1.25 (0.85-1.83) | 1.78 (1.21-2.61)            | 1.35 (0.94-1.93)           |               | 1.43 (0.92-2.21)    |
| 140-159                                                                          | 238    | 68235                                | 1.98 (1.54-2.54)    | 1.65 (1.28-2.13)    | 1.54 (1.18-2.02)    | 1.52 (1.05-2.21)    | 1.86 (1.31-2.64) | 1.92 (1.31-2.81)            | 1.55 (1.10-2.19)           | 0.873         | 1.99 (1.30-3.05)    |
| 160-179                                                                          | 100    | 22656                                | 2.42 (1.80-3.25)    | 2.00 (1.48-2.70)    | 1.89 (1.37-2.60)    | 1.82 (1.19-2.81)    | 2.23 (1.46-3.42) | 1.69 (0.98-2.92)            | 2.12 (1.45-3.12)           |               | 2.62 (1.46-4.70)    |
| >= 180                                                                           | 36     | 6358                                 | 3.18 (2.14-4.73)    | 2.56 (1.71-3.83)    | 2.44 (1.58-3.75)    | 2.56 (1.48-4.42)    | 2.45 (1.32-4.54) | 2.51 (1.15-5.47)            | 2.57 (1.58-4.20)           |               | 3.35 (1.29-8.69)    |
| p-trend                                                                          |        | 3E-13                                | 0.00000002          | 0.000002            | 0.001               | 0.000005            |                  | 0.0005                      | 0.000001                   |               | 0.00008             |
| <b>Diastolic Blood Pressure (mmHg) ESH classification</b>                        |        |                                      |                     |                     |                     |                     |                  |                             |                            |               |                     |
| < 80                                                                             | 214    | 132590                               | 1 (referent)        | 1 (referent)        | 1 (referent)        | 1 (referent)        | 1 (referent)     | 1 (referent)                | 1 (referent)               |               | 1 (referent)        |
| 80-84                                                                            | 157    | 64872                                | 1.25 (1.02-1.55)    | 1.16 (0.94-1.43)    | 1.22 (0.97-1.52)    | 1.21 (0.91-1.62)    | 1.07 (0.78-1.47) | 1.08 (0.78-1.50)            | 1.25 (0.94-1.65)           |               | 1.33 (0.90-1.95)    |
| 85-89                                                                            | 109    | 41500                                | 1.24 (0.98-1.57)    | 1.11 (0.88-1.41)    | 1.11 (0.86-1.43)    | 1.10 (0.80-1.52)    | 1.12 (0.79-1.59) | 1.14 (0.78-1.66)            | 1.15 (0.85-1.56)           |               | 1.49 (0.97-2.28)    |
| 90-99                                                                            | 185    | 51196                                | 1.66 (1.36-2.03)    | 1.42 (1.16-1.75)    | 1.45 (1.16-1.81)    | 1.27 (0.95-1.69)    | 1.67 (1.23-2.26) | 1.30 (0.91-1.86)            | 1.55 (1.20-2.02)           | 0.391         | 1.89 (1.28-2.79)    |
| 100-109                                                                          | 72     | 13896                                | 2.32 (1.77-3.05)    | 1.90 (1.44-2.51)    | 1.84 (1.36-2.49)    | 1.83 (1.28-2.62)    | 1.96 (1.24-3.10) | 2.13 (1.28-3.55)            | 2.00 (1.43-2.80)           |               | 2.67 (1.57-4.55)    |
| >= 110                                                                           | 21     | 3264                                 | 2.97 (1.89-4.66)    | 2.28 (1.45-3.61)    | 2.12 (1.28-3.51)    | 2.34 (1.36-4.02)    | 1.97 (0.80-4.88) | 1.20 (0.29-4.90)            | 2.69 (1.64-4.41)           |               | 3.29 (1.40-7.76)    |
| p-trend                                                                          |        | 4E-13                                | 0.0000003           | 0.000006            | 0.0007              | 0.0001              |                  | 0.015                       | 0.000006                   |               | 0.00001             |
| <b>Systolic Blood Pressure (mmHg) ASH classification</b>                         |        |                                      |                     |                     |                     |                     |                  |                             |                            |               |                     |
| < 120                                                                            | 96     | 86141                                | 1 (referent)        | 1 (referent)        | 1 (referent)        | 1 (referent)        | 1 (referent)     | 1 (referent)                | 1 (referent)               |               | 1 (referent)        |
| 120-139                                                                          | 288    | 123928                               | 1.56 (1.24-1.98)    | 1.38 (1.08-1.74)    | 1.35 (1.05-1.74)    | 1.49 (1.04-2.12)    | 1.23 (0.88-1.71) | 1.55 (1.10-2.17)            | 1.28 (0.92-1.79)           |               | 1.42 (0.98-2.05)    |
| 140-159                                                                          | 238    | 68235                                | 1.97 (1.54-2.52)    | 1.64 (1.27-2.12)    | 1.53 (1.17-2.00)    | 1.51 (1.04-2.19)    | 1.86 (1.31-2.64) | 1.90 (1.30-2.78)            | 1.54 (1.10-2.18)           | 0.715         | 1.99 (1.30-3.04)    |
| >= 160                                                                           | 136    | 29014                                | 2.56 (1.94-3.38)    | 2.10 (1.58-2.79)    | 1.98 (1.47-2.68)    | 1.96 (1.30-2.95)    | 2.27 (1.52-3.40) | 1.84 (1.12-3.02)            | 2.21 (1.53-3.20)           |               | 2.75 (1.60-4.73)    |
| p-trend                                                                          |        | 2E-12                                | 0.00000009          | 0.000008            | 0.0004              | 0.00003             |                  | 0.002                       | 0.000002                   |               | 0.00004             |
| <b>Diastolic Blood Pressure (mmHg) ASH classification</b>                        |        |                                      |                     |                     |                     |                     |                  |                             |                            |               |                     |
| < 80                                                                             | 214    | 132590                               | 1 (referent)        | 1 (referent)        | 1 (referent)        | 1 (referent)        | 1 (referent)     | 1 (referent)                | 1 (referent)               |               | 1 (referent)        |
| 80-89                                                                            | 266    | 106372                               | 1.25 (1.04-1.50)    | 1.14 (0.95-1.37)    | 1.17 (0.96-1.43)    | 1.17 (0.90-1.51)    | 1.09 (0.83-1.43) | 1.10 (0.83-1.46)            | 1.20 (0.94-1.54)           |               | 1.39 (0.99-1.95)    |
| 90-99                                                                            | 185    | 51196                                | 1.66 (1.36-2.03)    | 1.42 (1.16-1.75)    | 1.45 (1.16-1.81)    | 1.27 (0.95-1.69)    | 1.67 (1.23-2.26) | 1.30 (0.91-1.86)            | 1.55 (1.20-2.02)           | 0.375         | 1.89 (1.28-2.79)    |
| >= 100                                                                           | 93     | 17160                                | 2.45 (1.91-3.13)    | 1.98 (1.53-2.55)    | 1.90 (1.44-2.51)    | 1.94 (1.39-2.70)    | 1.96 (1.28-3.00) | 1.98 (1.21-3.23)            | 2.14 (1.58-2.92)           |               | 2.79 (1.71-4.54)    |
| p-trend                                                                          |        | 1E-13                                | 0.00000009          | 0.000001            | 0.0003              | 0.00009             |                  | 0.011                       | 0.000002                   |               | 0.00001             |
| <b>Mean BP (mmHg) (1/3SBP+2/3DBP) Cohort-specific quartiles</b>                  |        |                                      |                     |                     |                     |                     |                  |                             |                            |               |                     |
| 50.0-88.3                                                                        | 82     | 76991                                | 1 (referent)        | 1 (referent)        | 1 (referent)        | 1 (referent)        | 1 (referent)     | 1 (referent)                | 1 (referent)               |               | 1 (referent)        |
| 88.5-96.6                                                                        | 150    | 77727                                | 1.43 (1.09-1.87)    | 1.30 (0.99-1.70)    | 1.33 (1.00-1.79)    | 1.36 (0.90-2.07)    | 1.25 (0.86-1.81) | 1.38 (0.94-2.01)            | 1.26 (0.84-1.87)           |               | 1.19 (0.77-1.83)    |
| 96.8-105.5                                                                       | 218    | 76327                                | 1.82 (1.40-2.36)    | 1.57 (1.21-2.05)    | 1.62 (1.22-2.14)    | 1.70 (1.14-2.54)    | 1.43 (0.99-2.05) | 1.85 (1.28-2.67)            | 1.45 (1.00-2.12)           | 0.777         | 1.51 (0.98-2.33)    |
| 105.6-216.6                                                                      | 308    | 76273                                | 2.33 (1.81-3.00)    | 1.90 (1.46-2.47)    | 1.90 (1.43-2.52)    | 1.80 (1.20-2.68)    | 2.09 (1.47-2.97) | 1.87 (1.26-2.76)            | 1.95 (1.35-2.81)           |               | 2.26 (1.46-3.49)    |
| p-trend                                                                          |        | 4E-13                                | 0.0000001           | 0.000001            | 0.002               | 0.00001             |                  | 0.0005                      | 0.000007                   |               | 0.00006             |
| <b>Hypertension (SBP &gt;= 140 mmHg, or DBP &gt;= 90 mmHg, or self-reported)</b> |        |                                      |                     |                     |                     |                     |                  |                             |                            |               |                     |
| Normotensive                                                                     | 293    | 174179                               | 1 (referent)        | 1 (referent)        | 1 (referent)        | 1 (referent)        | 1 (referent)     | 1 (referent)                | 1 (referent)               |               | 1 (referent)        |
| Hypertensive                                                                     | 465    | 133139                               | 1.56 (1.34-1.81)    | 1.41 (1.21-1.65)    | 1.38 (1.17-1.63)    | 1.14 (0.93-1.39)    | 1.87 (1.47-2.38) | 1.49 (1.16-1.92)            | 1.42 (1.16-1.72)           | 0.753         | 1.74 (1.31-2.30)    |



| Renal pelvis and ureter                                              |  | Cases | Cohort | HR (crude)          | HR (adjusted)       | Excluding first 2 years of follow-up HR (adjusted) | Men HR (adjusted)   | Women HR (adjusted) | Sex p-interaction | BMI <= 25 mg/m <sup>2</sup> HR (adjusted) | BMI > 25 mg/m <sup>2</sup> HR (adjusted) | BMI p-interaction | Age <= 53 yrs HR (adjusted) |
|----------------------------------------------------------------------|--|-------|--------|---------------------|---------------------|----------------------------------------------------|---------------------|---------------------|-------------------|-------------------------------------------|------------------------------------------|-------------------|-----------------------------|
| Cases                                                                |  |       |        | 112                 | 112                 | 107                                                | 56                  | 56                  |                   | 49                                        | 63                                       |                   | 20                          |
| Cohort size                                                          |  |       |        | 307318              | 307318              | 301857                                             | 112591              | 194727              |                   | 146326                                    | 160992                                   |                   | 153303                      |
| Mean Systolic Blood Pressure continuous (per 10mmHg increase)        |  | 112   | 307318 | 1.043 (0.947-1.148) | 1.049 (0.951-1.157) | 1.049 (0.949-1.161)                                | 0.995 (0.857-1.155) | 1.100 (0.965-1.253) | 0.281             | 0.889 (0.754-1.048)                       | 1.166 (1.032-1.318)                      | 0.011             | 0.968 (0.735-1.275)         |
| Mean Diastolic Blood Pressure continuous (per 10mmHg increase)       |  | 112   | 307318 | 0.972 (0.812-1.165) | 0.972 (0.807-1.173) | 0.993 (0.820-1.202)                                | 0.905 (0.691-1.184) | 1.059 (0.818-1.371) | 0.426             | 0.811 (0.603-1.089)                       | 1.094 (0.860-1.391)                      | 0.159             | 0.936 (0.592-1.480)         |
| Mean Blood Pressure (1/3SBP+2/3DBP) continuous (per 10mmHg increase) |  | 112   | 307318 | 1.021 (0.878-1.186) | 1.027 (0.879-1.199) | 1.036 (0.884-1.215)                                | 0.949 (0.754-1.194) | 1.111 (0.901-1.370) | 0.301             | 0.825 (0.642-1.061)                       | 1.184 (0.973-1.442)                      | 0.034             | 0.945 (0.632-1.412)         |
| Systolic Blood Pressure (mmHg) ESH classification                    |  |       |        |                     |                     |                                                    |                     |                     |                   |                                           |                                          |                   |                             |
| < 120                                                                |  | 22    | 86141  | 1 (referent)        | 1 (referent)        | 1 (referent)                                       | 1 (referent)        | 1 (referent)        |                   | 1 (referent)                              | 1 (referent)                             |                   | 1 (referent)                |
| 120-129                                                              |  | 20    | 66446  | 0.78 (0.43-1.44)    | 0.79 (0.43-1.46)    | 0.77 (0.41-1.45)                                   | 0.33 (0.12-0.89)    | 1.57 (0.69-3.58)    |                   | 0.57 (0.26-1.24)                          | 1.83 (0.57-5.88)                         |                   | 1.20 (0.38-3.81)            |
| 130-139                                                              |  | 18    | 57482  | 0.65 (0.35-1.23)    | 0.66 (0.35-1.24)    | 0.60 (0.31-1.17)                                   | 0.48 (0.20-1.13)    | 0.87 (0.33-2.26)    |                   | 0.46 (0.20-1.08)                          | 1.47 (0.45-4.78)                         |                   | 0.99 (0.27-3.70)            |
| 140-159                                                              |  | 29    | 68235  | 0.67 (0.38-1.18)    | 0.67 (0.37-1.21)    | 0.69 (0.38-1.25)                                   | 0.52 (0.24-1.13)    | 0.81 (0.33-2.01)    | 0.306             | 0.34 (0.14-0.80)                          | 1.84 (0.61-5.54)                         | 0.005             | 0.68 (0.16-2.91)            |
| 160-179                                                              |  | 16    | 22656  | 0.96 (0.49-1.88)    | 1.00 (0.50-2.00)    | 1.02 (0.51-2.05)                                   | 0.77 (0.31-1.94)    | 1.32 (0.47-3.71)    |                   | 0.40 (0.12-1.42)                          | 2.91 (0.91-9.34)                         |                   | 0.86 (0.09-7.85)            |
| >= 180                                                               |  | 7     | 6358   | 1.45 (0.60-3.50)    | 1.42 (0.58-3.47)    | 1.26 (0.49-3.24)                                   | 0.27 (0.03-2.14)    | 3.65 (1.22-10.87)   |                   | 1.05 (0.23-4.75)                          | 3.47 (0.89-13.58)                        |                   | no cases                    |
| p-trend                                                              |  |       |        | 0.962               | 0.889               | 0.915                                              | 0.569               | 0.439               |                   | 0.043                                     | 0.043                                    |                   | 0.54                        |
| Diastolic Blood Pressure (mmHg) ESH classification                   |  |       |        |                     |                     |                                                    |                     |                     |                   |                                           |                                          |                   |                             |
| < 80                                                                 |  | 42    | 132590 | 1 (referent)        | 1 (referent)        | 1 (referent)                                       | 1 (referent)        | 1 (referent)        |                   | 1 (referent)                              | 1 (referent)                             |                   | 1 (referent)                |
| 80-84                                                                |  | 19    | 64872  | 0.75 (0.44-1.30)    | 0.76 (0.44-1.32)    | 0.70 (0.39-1.25)                                   | 0.99 (0.46-2.13)    | 0.55 (0.24-1.28)    |                   | 0.52 (0.22-1.21)                          | 1.12 (0.52-2.40)                         |                   | 0.91 (0.27-3.04)            |
| 85-89                                                                |  | 16    | 41500  | 0.85 (0.48-1.52)    | 0.86 (0.48-1.54)    | 0.83 (0.45-1.51)                                   | 1.04 (0.46-2.34)    | 0.68 (0.28-1.68)    |                   | 0.47 (0.16-1.34)                          | 1.29 (0.60-2.79)                         |                   | 1.40 (0.41-4.77)            |
| 90-99                                                                |  | 29    | 51196  | 1.19 (0.73-1.93)    | 1.20 (0.73-1.97)    | 1.22 (0.74-2.02)                                   | 1.16 (0.56-2.42)    | 1.36 (0.68-2.71)    | 0.583             | 1.08 (0.52-2.22)                          | 1.43 (0.71-2.91)                         | 0.194             | 0.60 (0.12-2.93)            |
| 100-109                                                              |  | 5     | 13896  | 0.72 (0.28-1.82)    | 0.70 (0.27-1.81)    | 0.72 (0.28-1.85)                                   | 0.74 (0.21-2.62)    | 0.69 (0.16-2.97)    |                   | no cases                                  | 1.27 (0.45-3.57)                         |                   | 1.31 (0.16-11.08)           |
| >= 110                                                               |  | 1     | 3264   | 0.66 (0.09-4.83)    | 0.67 (0.09-4.89)    | 0.68 (0.09-5.02)                                   | no cases            | 1.84 (0.24-13.92)   |                   | no cases                                  | 1.15 (0.15-8.79)                         |                   | no cases                    |
| p-trend                                                              |  |       |        | 0.91                | 0.912               | 0.819                                              | 0.802               | 0.612               |                   | 0.317                                     | 0.37                                     |                   | 0.777                       |
| Systolic Blood Pressure (mmHg) ASH classification                    |  |       |        |                     |                     |                                                    |                     |                     |                   |                                           |                                          |                   |                             |
| < 120                                                                |  | 22    | 86141  | 1 (referent)        | 1 (referent)        | 1 (referent)                                       | 1 (referent)        | 1 (referent)        |                   | 1 (referent)                              | 1 (referent)                             |                   | 1 (referent)                |
| 120-139                                                              |  | 38    | 123928 | 0.72 (0.42-1.22)    | 0.72 (0.42-1.24)    | 0.69 (0.39-1.20)                                   | 0.41 (0.19-0.88)    | 1.22 (0.57-2.64)    |                   | 0.51 (0.26-1.00)                          | 1.64 (0.55-4.86)                         |                   | 1.11 (0.39-3.18)            |
| 140-159                                                              |  | 29    | 68235  | 0.67 (0.38-1.18)    | 0.68 (0.38-1.22)    | 0.69 (0.38-1.26)                                   | 0.52 (0.24-1.12)    | 0.82 (0.33-2.03)    | 0.285             | 0.34 (0.14-0.80)                          | 1.85 (0.61-5.56)                         | 0.004             | 0.68 (0.16-2.93)            |
| >= 160                                                               |  | 23    | 29014  | 1.07 (0.58-1.99)    | 1.11 (0.59-2.09)    | 1.08 (0.57-2.08)                                   | 0.65 (0.26-1.59)    | 1.89 (0.77-4.66)    |                   | 0.54 (0.19-1.51)                          | 3.06 (0.99-9.49)                         |                   | 0.73 (0.08-6.60)            |
| p-trend                                                              |  |       |        | 0.874               | 0.784               | 0.74                                               | 0.617               | 0.361               |                   | 0.043                                     | 0.029                                    |                   | 0.613                       |
| Diastolic Blood Pressure (mmHg) ASH classification                   |  |       |        |                     |                     |                                                    |                     |                     |                   |                                           |                                          |                   |                             |
| < 80                                                                 |  | 42    | 132590 | 1 (referent)        | 1 (referent)        | 1 (referent)                                       | 1 (referent)        | 1 (referent)        |                   | 1 (referent)                              | 1 (referent)                             |                   | 1 (referent)                |
| 80-89                                                                |  | 35    | 106372 | 0.80 (0.51-1.25)    | 0.80 (0.51-1.27)    | 0.75 (0.47-1.21)                                   | 1.01 (0.52-1.96)    | 0.60 (0.31-1.19)    |                   | 0.50 (0.24-1.02)                          | 1.20 (0.62-2.30)                         |                   | 1.10 (0.41-2.95)            |
| 90-99                                                                |  | 29    | 51196  | 1.19 (0.73-1.93)    | 1.20 (0.73-1.97)    | 1.22 (0.74-2.02)                                   | 1.16 (0.56-2.42)    | 1.36 (0.68-2.71)    | 0.667             | 1.08 (0.52-2.22)                          | 1.43 (0.71-2.90)                         | 0.178             | 0.60 (0.12-2.90)            |
| >= 100                                                               |  | 6     | 17160  | 0.71 (0.30-1.67)    | 0.69 (0.29-1.67)    | 0.71 (0.29-1.71)                                   | 0.60 (0.17-2.12)    | 0.87 (0.26-2.95)    |                   | no cases                                  | 1.25 (0.48-3.29)                         |                   | 0.98 (0.12-8.22)            |
| p-trend                                                              |  |       |        | 0.97                | 0.964               | 0.963                                              | 0.779               | 0.759               |                   | 0.259                                     | 0.412                                    |                   | 0.711                       |
| Mean BP (mmHg) (1/3SBP+2/3DBP) Cohort-specific quartiles             |  |       |        |                     |                     |                                                    |                     |                     |                   |                                           |                                          |                   |                             |
| 50.0-88.3                                                            |  | 18    | 76991  | 1 (referent)        | 1 (referent)        | 1 (referent)                                       | 1 (referent)        | 1 (referent)        |                   | 1 (referent)                              | 1 (referent)                             |                   | 1 (referent)                |
| 88.5-96.6                                                            |  | 28    | 77727  | 1.07 (0.59-1.95)    | 1.09 (0.60-1.98)    | 1.05 (0.56-1.95)                                   | 1.83 (0.67-5.02)    | 0.74 (0.33-1.67)    |                   | 0.93 (0.45-1.93)                          | 1.63 (0.52-5.09)                         |                   | 1.25 (0.39-4.05)            |
| 96.8-105.5                                                           |  | 24    | 76327  | 0.74 (0.40-1.37)    | 0.75 (0.40-1.41)    | 0.74 (0.39-1.42)                                   | 0.83 (0.28-2.44)    | 0.77 (0.35-1.72)    | 0.831             | 0.46 (0.19-1.12)                          | 1.48 (0.49-4.49)                         | 0.053             | 0.97 (0.26-3.54)            |
| 105.6-216.6                                                          |  | 42    | 76273  | 1.03 (0.58-1.81)    | 1.05 (0.58-1.89)    | 1.04 (0.57-1.92)                                   | 1.36 (0.49-3.71)    | 0.98 (0.46-2.10)    |                   | 0.62 (0.27-1.42)                          | 2.01 (0.69-5.85)                         |                   | 0.67 (0.15-3.04)            |
| p-trend                                                              |  |       |        | 0.872               | 0.93                | 0.984                                              | 0.885               | 0.923               |                   | 0.116                                     | 0.196                                    |                   | 0.561                       |
| Hypertension (SBP >= 140 mmHg, or DBP >= 90 mmHg, or self-reported)  |  |       |        |                     |                     |                                                    |                     |                     |                   |                                           |                                          |                   |                             |
| Normotensive                                                         |  | 53    | 174179 | 1 (referent)        | 1 (referent)        | 1 (referent)                                       | 1 (referent)        | 1 (referent)        |                   | 1 (referent)                              | 1 (referent)                             |                   | 1 (referent)                |
| Hypertensive                                                         |  | 59    | 133139 | 0.91 (0.62-1.34)    | 0.93 (0.63-1.39)    | 0.95 (0.63-1.41)                                   | 0.79 (0.45-1.37)    | 1.11 (0.64-1.94)    | 0.351             | 0.68 (0.37-1.24)                          | 1.20 (0.70-2.08)                         | 0.144             | 0.55 (0.19-1.56)            |



| Bladder                                                              | Cases | Cohort | Excluding first 2 years of follow-up |                     |                     | Men                 | Women               | Sex           | BMI <= 25 mg/m <sup>2</sup> | BMI > 25 mg/m <sup>2</sup> | BMI           | Age <= 53 yrs       |
|----------------------------------------------------------------------|-------|--------|--------------------------------------|---------------------|---------------------|---------------------|---------------------|---------------|-----------------------------|----------------------------|---------------|---------------------|
|                                                                      |       |        | HR (crude)                           | HR (adjusted)       | HR (adjusted)       | HR (adjusted)       | HR (adjusted)       | p-interaction | HR (adjusted)               | HR (adjusted)              | p-interaction | HR (adjusted)       |
| Cases                                                                |       |        | 1192                                 | 1192                | 1109                | 862                 | 330                 |               | 462                         | 730                        |               | 243                 |
| Cohort size                                                          |       |        | 307318                               | 307318              | 301857              | 112591              | 194727              |               | 146326                      | 160992                     |               | 153303              |
| Mean Systolic Blood Pressure continuous (per 10mmHg increase)        | 1192  | 307318 | 1.038 (1.007-1.070)                  | 1.013 (0.981-1.045) | 1.007 (0.975-1.041) | 1.024 (0.986-1.063) | 0.991 (0.934-1.051) | 0.219         | 1.003 (0.953-1.055)         | 1.019 (0.979-1.060)        | 0.56          | 1.034 (0.954-1.121) |
| Mean Diastolic Blood Pressure continuous (per 10mmHg increase)       | 1192  | 307318 | 1.077 (1.019-1.137)                  | 1.001 (0.945-1.060) | 1.002 (0.944-1.064) | 1.019 (0.953-1.090) | 0.964 (0.862-1.078) | 0.324         | 1.024 (0.933-1.125)         | 0.991 (0.922-1.065)        | 0.588         | 0.977 (0.856-1.116) |
| Mean Blood Pressure (1/3SBP+2/3DBP) continuous (per 10mmHg increase) | 1192  | 307318 | 1.067 (1.018-1.117)                  | 1.010 (0.962-1.061) | 1.007 (0.957-1.059) | 1.028 (0.970-1.089) | 0.976 (0.889-1.071) | 0.237         | 1.014 (0.937-1.097)         | 1.010 (0.949-1.075)        | 0.998         | 1.012 (0.900-1.138) |
| Systolic Blood Pressure (mmHg) ESH classification                    |       |        |                                      |                     |                     |                     |                     |               |                             |                            |               |                     |
| < 120                                                                | 162   | 86141  | 1 (referent)                         | 1 (referent)        | 1 (referent)        | 1 (referent)        | 1 (referent)        |               | 1 (referent)                | 1 (referent)               |               | 1 (referent)        |
| 120-129                                                              | 205   | 66446  | 1.10 (0.89-1.36)                     | 0.97 (0.79-1.19)    | 0.92 (0.74-1.14)    | 1.05 (0.80-1.36)    | 0.85 (0.60-1.22)    |               | 0.92 (0.69-1.24)            | 1.02 (0.75-1.39)           |               | 0.97 (0.66-1.42)    |
| 130-139                                                              | 245   | 57482  | 1.23 (1.01-1.51)                     | 1.04 (0.85-1.28)    | 1.02 (0.83-1.26)    | 1.09 (0.84-1.41)    | 1.02 (0.72-1.45)    |               | 0.90 (0.66-1.21)            | 1.17 (0.87-1.57)           |               | 1.26 (0.86-1.84)    |
| 140-159                                                              | 391   | 68235  | 1.29 (1.06-1.56)                     | 1.07 (0.88-1.31)    | 1.04 (0.85-1.27)    | 1.16 (0.91-1.49)    | 0.96 (0.69-1.35)    | 0.225         | 1.00 (0.75-1.32)            | 1.17 (0.88-1.54)           | 0.539         | 1.21 (0.81-1.80)    |
| 160-179                                                              | 143   | 22656  | 1.20 (0.95-1.52)                     | 1.00 (0.79-1.28)    | 0.95 (0.74-1.22)    | 1.14 (0.85-1.52)    | 0.77 (0.48-1.21)    |               | 0.95 (0.65-1.39)            | 1.08 (0.78-1.49)           |               | 1.30 (0.71-2.39)    |
| >= 180                                                               | 46    | 6358   | 1.36 (0.97-1.91)                     | 1.12 (0.80-1.58)    | 1.07 (0.75-1.53)    | 1.17 (0.78-1.76)    | 1.09 (0.58-2.06)    |               | 1.07 (0.59-1.92)            | 1.20 (0.78-1.86)           |               | 0.88 (0.21-3.65)    |
| p-trend                                                              |       |        | 0.014                                | 0.41                | 0.618               | 0.207               | 0.782               |               | 0.905                       | 0.328                      |               | 0.21                |
| Diastolic Blood Pressure (mmHg) ESH classification                   |       |        |                                      |                     |                     |                     |                     |               |                             |                            |               |                     |
| < 80                                                                 | 354   | 132590 | 1 (referent)                         | 1 (referent)        | 1 (referent)        | 1 (referent)        | 1 (referent)        |               | 1 (referent)                | 1 (referent)               |               | 1 (referent)        |
| 80-84                                                                | 264   | 64872  | 1.08 (0.92-1.27)                     | 1.00 (0.85-1.18)    | 0.98 (0.82-1.16)    | 0.93 (0.76-1.14)    | 1.20 (0.91-1.58)    |               | 0.91 (0.71-1.17)            | 1.07 (0.86-1.33)           |               | 1.07 (0.75-1.51)    |
| 85-89                                                                | 180   | 41500  | 1.08 (0.90-1.29)                     | 0.96 (0.80-1.15)    | 0.97 (0.81-1.18)    | 1.10 (0.89-1.35)    | 0.60 (0.40-0.91)    |               | 0.82 (0.61-1.12)            | 1.04 (0.82-1.32)           |               | 1.22 (0.83-1.81)    |
| 90-99                                                                | 281   | 51196  | 1.19 (1.01-1.40)                     | 1.03 (0.87-1.21)    | 1.02 (0.86-1.21)    | 1.06 (0.87-1.29)    | 0.96 (0.70-1.32)    | 0.407         | 1.05 (0.81-1.36)            | 1.03 (0.84-1.28)           | 0.964         | 1.23 (0.85-1.78)    |
| 100-109                                                              | 100   | 13896  | 1.50 (1.19-1.88)                     | 1.20 (0.95-1.51)    | 1.19 (0.93-1.51)    | 1.14 (0.87-1.49)    | 1.53 (0.98-2.40)    |               | 1.17 (0.77-1.77)            | 1.25 (0.94-1.65)           |               | 0.98 (0.51-1.87)    |
| >= 110                                                               | 13    | 3264   | 0.91 (0.52-1.59)                     | 0.69 (0.39-1.20)    | 0.74 (0.42-1.29)    | 0.74 (0.41-1.33)    | 0.35 (0.05-2.52)    |               | 0.75 (0.24-2.36)            | 0.71 (0.37-1.34)           |               | 0.38 (0.05-2.76)    |
| p-trend                                                              |       |        | 0.003                                | 0.605               | 0.579               | 0.397               | 0.791               |               | 0.775                       | 0.629                      |               | 0.585               |
| Systolic Blood Pressure (mmHg) ASH classification                    |       |        |                                      |                     |                     |                     |                     |               |                             |                            |               |                     |
| < 120                                                                | 162   | 86141  | 1 (referent)                         | 1 (referent)        | 1 (referent)        | 1 (referent)        | 1 (referent)        |               | 1 (referent)                | 1 (referent)               |               | 1 (referent)        |
| 120-139                                                              | 450   | 123928 | 1.17 (0.97-1.40)                     | 1.01 (0.84-1.21)    | 0.97 (0.80-1.17)    | 1.07 (0.84-1.35)    | 0.93 (0.69-1.27)    |               | 0.91 (0.71-1.18)            | 1.10 (0.84-1.45)           |               | 1.09 (0.78-1.52)    |
| 140-159                                                              | 391   | 68235  | 1.28 (1.06-1.55)                     | 1.07 (0.88-1.30)    | 1.03 (0.84-1.26)    | 1.16 (0.91-1.48)    | 0.96 (0.69-1.34)    | 0.141         | 1.00 (0.75-1.32)            | 1.16 (0.88-1.54)           | 0.685         | 1.20 (0.81-1.78)    |
| >= 160                                                               | 189   | 29014  | 1.23 (0.98-1.53)                     | 1.03 (0.82-1.29)    | 0.97 (0.77-1.23)    | 1.14 (0.86-1.51)    | 0.83 (0.55-1.26)    |               | 0.97 (0.68-1.39)            | 1.10 (0.81-1.50)           |               | 1.21 (0.68-2.17)    |
| p-trend                                                              |       |        | 0.037                                | 0.596               | 0.902               | 0.241               | 0.489               |               | 0.898                       | 0.548                      |               | 0.356               |
| Diastolic Blood Pressure (mmHg) ASH classification                   |       |        |                                      |                     |                     |                     |                     |               |                             |                            |               |                     |
| < 80                                                                 | 354   | 132590 | 1 (referent)                         | 1 (referent)        | 1 (referent)        | 1 (referent)        | 1 (referent)        |               | 1 (referent)                | 1 (referent)               |               | 1 (referent)        |
| 80-89                                                                | 444   | 106372 | 1.08 (0.93-1.24)                     | 0.98 (0.85-1.13)    | 0.97 (0.84-1.13)    | 1.00 (0.84-1.19)    | 0.96 (0.74-1.24)    |               | 0.88 (0.71-1.09)            | 1.05 (0.87-1.28)           |               | 1.13 (0.83-1.53)    |
| 90-99                                                                | 281   | 51196  | 1.19 (1.01-1.40)                     | 1.03 (0.87-1.21)    | 1.02 (0.86-1.21)    | 1.06 (0.87-1.28)    | 0.96 (0.70-1.33)    | 0.999         | 1.05 (0.81-1.36)            | 1.03 (0.83-1.28)           | 0.964         | 1.23 (0.85-1.78)    |
| >= 100                                                               | 113   | 17160  | 1.39 (1.12-1.73)                     | 1.10 (0.89-1.38)    | 1.10 (0.88-1.39)    | 1.06 (0.82-1.37)    | 1.36 (0.87-2.11)    |               | 1.10 (0.74-1.65)            | 1.14 (0.87-1.49)           |               | 0.86 (0.46-1.61)    |
| p-trend                                                              |       |        | 0.001                                | 0.408               | 0.455               | 0.513               | 0.498               |               | 0.653                       | 0.448                      |               | 0.675               |
| Mean BP (mmHg) (1/3SBP+2/3DBP) Cohort-specific quartiles             |       |        |                                      |                     |                     |                     |                     |               |                             |                            |               |                     |
| 50.0-88.3                                                            | 162   | 76991  | 1 (referent)                         | 1 (referent)        | 1 (referent)        | 1 (referent)        | 1 (referent)        |               | 1 (referent)                | 1 (referent)               |               | 1 (referent)        |
| 88.5-96.6                                                            | 254   | 77727  | 1.03 (0.84-1.25)                     | 0.92 (0.75-1.13)    | 0.95 (0.77-1.17)    | 0.94 (0.73-1.21)    | 0.93 (0.67-1.30)    |               | 0.88 (0.67-1.16)            | 0.96 (0.71-1.29)           |               | 0.83 (0.57-1.20)    |
| 96.8-105.5                                                           | 322   | 76327  | 1.09 (0.90-1.32)                     | 0.93 (0.76-1.13)    | 0.94 (0.76-1.15)    | 1.01 (0.79-1.29)    | 0.82 (0.59-1.15)    | 0.252         | 0.85 (0.64-1.13)            | 0.99 (0.74-1.31)           | 0.908         | 1.05 (0.72-1.53)    |
| 105.6-216.6                                                          | 454   | 76273  | 1.21 (1.01-1.46)                     | 0.99 (0.81-1.20)    | 1.00 (0.81-1.22)    | 1.05 (0.82-1.34)    | 0.92 (0.66-1.29)    |               | 1.00 (0.76-1.32)            | 1.00 (0.76-1.31)           |               | 1.04 (0.69-1.55)    |
| p-trend                                                              |       |        | 0.016                                | 0.806               | 0.837               | 0.391               | 0.559               |               | 0.897                       | 0.835                      |               | 0.53                |
| Hypertension (SBP >= 140 mmHg, or DBP >= 90 mmHg, or self-reported)  |       |        |                                      |                     |                     |                     |                     |               |                             |                            |               |                     |
| Normotensive                                                         | 504   | 174179 | 1 (referent)                         | 1 (referent)        | 1 (referent)        | 1 (referent)        | 1 (referent)        |               | 1 (referent)                | 1 (referent)               |               | 1 (referent)        |
| Hypertensive                                                         | 688   | 133139 | 1.08 (0.96-1.22)                     | 1.02 (0.91-1.16)    | 1.02 (0.90-1.15)    | 1.05 (0.91-1.22)    | 0.97 (0.77-1.22)    | 0.405         | 1.07 (0.88-1.30)            | 1.00 (0.85-1.17)           | 0.65          | 1.16 (0.89-1.52)    |



| Age > 53 yrs                                                                                                              | Age           | Never smokers                                                                                                             | Ever smokers                                                                                                              | Smoking       | Alcohol <= 12g                                                                                                            | Alcohol > 12g                                                                                                             | Alcohol       | No antihypertensive treatment                                                                                             | Antihypertensive treatment                                                                                                | Treatment     | Bladder                                                                                                                       |
|---------------------------------------------------------------------------------------------------------------------------|---------------|---------------------------------------------------------------------------------------------------------------------------|---------------------------------------------------------------------------------------------------------------------------|---------------|---------------------------------------------------------------------------------------------------------------------------|---------------------------------------------------------------------------------------------------------------------------|---------------|---------------------------------------------------------------------------------------------------------------------------|---------------------------------------------------------------------------------------------------------------------------|---------------|-------------------------------------------------------------------------------------------------------------------------------|
| HR (adjusted)                                                                                                             | p-interaction | HR (adjusted)                                                                                                             | HR (adjusted)                                                                                                             | p-interaction | HR (adjusted)                                                                                                             | HR (adjusted)                                                                                                             | p-interaction | HR (adjusted)                                                                                                             | HR (adjusted)                                                                                                             | p-interaction |                                                                                                                               |
| 949<br>154015                                                                                                             |               | 253<br>141931                                                                                                             | 931<br>160623                                                                                                             |               | 677<br>205214                                                                                                             | 515<br>102104                                                                                                             |               | 810<br>227336                                                                                                             | 179<br>37017                                                                                                              |               | Cases<br>Cohort size                                                                                                          |
| 1.008 (0.974-1.043)                                                                                                       | 0.573         | 0.963 (0.897-1.035)                                                                                                       | 1.024 (0.988-1.061)                                                                                                       | 0.161         | 1.009 (0.967-1.052)                                                                                                       | 1.017 (0.970-1.068)                                                                                                       | 0.676         | 1.003 (0.963-1.046)                                                                                                       | 1.049 (0.967-1.138)                                                                                                       | 0.617         | Mean Systolic Blood Pressure continuous (per 10mmHg increase)                                                                 |
| 1.006 (0.944-1.072)                                                                                                       | 0.534         | 0.890 (0.783-1.012)                                                                                                       | 1.027 (0.963-1.095)                                                                                                       | 0.075         | 0.980 (0.908-1.058)                                                                                                       | 1.030 (0.944-1.124)                                                                                                       | 0.361         | 0.971 (0.901-1.046)                                                                                                       | 1.054 (0.904-1.228)                                                                                                       | 0.543         | Mean Diastolic Blood Pressure continuous (per 10mmHg increase)                                                                |
| 1.009 (0.956-1.065)                                                                                                       | 0.91          | 0.917 (0.822-1.024)                                                                                                       | 1.032 (0.977-1.090)                                                                                                       | 0.084         | 0.997 (0.934-1.064)                                                                                                       | 1.029 (0.955-1.108)                                                                                                       | 0.465         | 0.988 (0.926-1.054)                                                                                                       | 1.071 (0.938-1.222)                                                                                                       | 0.529         | Mean Blood Pressure (1/3SBP+2/3DBP) continuous (per 10mmHg increase)                                                          |
| 1 (referent)<br>0.97 (0.75-1.24)<br>0.97 (0.76-1.24)<br>1.02 (0.81-1.29)<br>0.95 (0.72-1.24)<br>1.09 (0.76-1.57)<br>0.791 | 0.328         | 1 (referent)<br>1.30 (0.83-2.04)<br>1.20 (0.76-1.88)<br>1.12 (0.72-1.74)<br>0.97 (0.56-1.68)<br>1.01 (0.43-2.34)<br>0.627 | 1 (referent)<br>0.90 (0.71-1.14)<br>1.01 (0.80-1.28)<br>1.07 (0.86-1.34)<br>0.99 (0.75-1.30)<br>1.15 (0.79-1.67)<br>0.286 | 0.416         | 1 (referent)<br>0.93 (0.71-1.22)<br>1.05 (0.81-1.36)<br>1.03 (0.80-1.33)<br>0.99 (0.73-1.36)<br>1.11 (0.71-1.75)<br>0.59  | 1 (referent)<br>1.04 (0.74-1.46)<br>1.05 (0.76-1.47)<br>1.15 (0.84-1.57)<br>1.03 (0.70-1.50)<br>1.16 (0.69-1.96)<br>0.515 | 0.712         | 1 (referent)<br>1.01 (0.80-1.27)<br>0.97 (0.76-1.22)<br>1.07 (0.85-1.34)<br>1.08 (0.81-1.46)<br>0.73 (0.41-1.31)<br>0.767 | three cases in referent<br>-<br>-<br>-<br>-<br>-<br>-                                                                     | -             | ESH classification<br>< 120<br>120-129<br>130-139<br>140-159<br>160-179<br>>= 180<br>p-trend                                  |
| 1 (referent)<br>0.98 (0.81-1.17)<br>0.90 (0.73-1.11)<br>0.98 (0.81-1.18)<br>1.22 (0.95-1.56)<br>0.72 (0.40-1.30)<br>0.777 | 0.928         | 1 (referent)<br>0.93 (0.66-1.31)<br>0.84 (0.57-1.25)<br>0.82 (0.57-1.17)<br>1.06 (0.64-1.75)<br>no cases<br>0.222         | 1 (referent)<br>1.03 (0.85-1.24)<br>0.99 (0.81-1.22)<br>1.08 (0.89-1.30)<br>1.22 (0.94-1.59)<br>0.87 (0.49-1.52)<br>0.304 | 0.171         | 1 (referent)<br>1.03 (0.83-1.27)<br>0.88 (0.69-1.13)<br>0.95 (0.76-1.19)<br>1.27 (0.94-1.72)<br>0.48 (0.20-1.16)<br>0.816 | 1 (referent)<br>0.95 (0.73-1.24)<br>1.07 (0.81-1.41)<br>1.12 (0.87-1.44)<br>1.13 (0.79-1.61)<br>0.96 (0.46-1.97)<br>0.297 | 0.29          | 1 (referent)<br>0.97 (0.81-1.18)<br>1.03 (0.83-1.27)<br>1.03 (0.84-1.26)<br>1.12 (0.80-1.57)<br>0.53 (0.20-1.44)<br>0.774 | 1 (referent)<br>1.07 (0.60-1.90)<br>0.62 (0.32-1.18)<br>0.96 (0.57-1.62)<br>1.19 (0.67-2.12)<br>0.73 (0.27-2.00)<br>0.778 | 0.969         | Diastolic Blood Pressure (mmHg)<br>ESH classification<br>< 80<br>80-84<br>85-89<br>90-99<br>100-109<br>>= 110<br>p-trend      |
| 1 (referent)<br>0.97 (0.78-1.21)<br>1.02 (0.81-1.28)<br>0.98 (0.76-1.26)<br>0.905                                         | 0.451         | 1 (referent)<br>1.25 (0.83-1.88)<br>1.13 (0.73-1.75)<br>0.98 (0.58-1.65)<br>0.646                                         | 1 (referent)<br>0.96 (0.78-1.18)<br>1.07 (0.86-1.33)<br>1.02 (0.79-1.31)<br>0.483                                         | 0.5           | 1 (referent)<br>0.99 (0.78-1.25)<br>1.03 (0.80-1.33)<br>1.01 (0.75-1.36)<br>0.805                                         | 1 (referent)<br>1.05 (0.77-1.42)<br>1.15 (0.84-1.57)<br>1.06 (0.74-1.51)<br>0.585                                         | 0.635         | 1 (referent)<br>0.99 (0.80-1.21)<br>1.07 (0.86-1.34)<br>1.02 (0.77-1.36)<br>0.588                                         | three cases in referent<br>-<br>-<br>-<br>-                                                                               | -             | Systolic Blood Pressure (mmHg)<br>ASH classification<br>< 120<br>120-139<br>140-159<br>>= 160<br>p-trend                      |
| 1 (referent)<br>0.94 (0.80-1.11)<br>0.98 (0.81-1.18)<br>1.13 (0.89-1.43)<br>0.497                                         | 0.87          | 1 (referent)<br>0.89 (0.66-1.21)<br>0.82 (0.57-1.18)<br>0.87 (0.53-1.43)<br>0.345                                         | 1 (referent)<br>1.01 (0.86-1.19)<br>1.08 (0.89-1.30)<br>1.16 (0.90-1.48)<br>0.213                                         | 0.21          | 1 (referent)<br>0.97 (0.80-1.17)<br>0.95 (0.77-1.19)<br>1.12 (0.83-1.50)<br>0.779                                         | 1 (referent)<br>1.00 (0.80-1.26)<br>1.12 (0.87-1.44)<br>1.10 (0.78-1.54)<br>0.365                                         | 0.525         | 1 (referent)<br>1.00 (0.84-1.17)<br>1.03 (0.84-1.26)<br>1.02 (0.74-1.41)<br>0.79                                          | 1 (referent)<br>0.84 (0.49-1.43)<br>0.96 (0.57-1.63)<br>1.12 (0.63-1.96)<br>0.374                                         | 0.535         | Diastolic Blood Pressure (mmHg)<br>ASH classification<br>< 80<br>80-89<br>90-99<br>>= 100<br>p-trend                          |
| 1 (referent)<br>0.96 (0.76-1.22)<br>0.90 (0.72-1.14)<br>0.97 (0.78-1.22)<br>0.93                                          | 0.673         | 1 (referent)<br>0.98 (0.65-1.50)<br>0.89 (0.59-1.36)<br>0.85 (0.56-1.29)<br>0.34                                          | 1 (referent)<br>0.92 (0.73-1.15)<br>0.95 (0.76-1.18)<br>1.02 (0.82-1.27)<br>0.509                                         | 0.315         | 1 (referent)<br>0.93 (0.73-1.20)<br>0.93 (0.72-1.19)<br>0.95 (0.74-1.22)<br>0.807                                         | 1 (referent)<br>0.90 (0.64-1.25)<br>0.94 (0.68-1.30)<br>1.03 (0.75-1.41)<br>0.498                                         | 0.42          | 1 (referent)<br>0.89 (0.72-1.12)<br>0.88 (0.70-1.09)<br>0.98 (0.78-1.23)<br>0.944                                         | three cases in referent<br>-<br>-<br>-<br>-                                                                               | -             | Mean BP (mmHg) (1/3SBP+2/3DBP)<br>Cohort-specific quartiles<br>50.0-88.3<br>88.5-96.6<br>96.8-105.5<br>105.6-216.6<br>p-trend |
| 1 (referent)<br>0.99 (0.86-1.14)                                                                                          | 0.369         | 1 (referent)<br>0.91 (0.70-1.19)                                                                                          | 1 (referent)<br>1.04 (0.91-1.20)                                                                                          | 0.375         | 1 (referent)<br>1.02 (0.87-1.20)                                                                                          | 1 (referent)<br>1.03 (0.86-1.24)                                                                                          | 0.767         | -<br>1 (referent)                                                                                                         | -<br>0.97 (0.80-1.17)                                                                                                     |               | Hypertension (SBP >= 140 mmHg,<br>or DBP >= 90 mmHg, or self-reported)<br>Normotensive<br>Hypertensive                        |

| Prostate                                                                         |        | Excluding first 2 years of follow-up |                     |                     | Men                 | Women         | Sex           | BMI <= 25 mg/m <sup>2</sup> | BMI > 25 mg/m <sup>2</sup> | BMI           | Age <= 53 yrs       |
|----------------------------------------------------------------------------------|--------|--------------------------------------|---------------------|---------------------|---------------------|---------------|---------------|-----------------------------|----------------------------|---------------|---------------------|
| Cases                                                                            | Cohort | HR (crude)                           | HR (adjusted)       | HR (adjusted)       | HR (adjusted)       | HR (adjusted) | p-interaction | HR (adjusted)               | HR (adjusted)              | p-interaction | HR (adjusted)       |
| Cases                                                                            |        | 5848                                 | 5848                | 5616                |                     |               |               | 2207                        | 3641                       |               | 1339                |
| Cohort size                                                                      |        | 112591                               | 112591              | 110306              |                     |               |               | 41910                       | 70681                      |               | 54234               |
| <b>Mean Systolic Blood Pressure continuous (per 10mmHg increase)</b>             | 5848   | 112591                               | 0.985 (0.971-0.999) | 0.993 (0.979-1.008) | 0.991 (0.976-1.006) |               |               | 1.003 (0.979-1.028)         | 0.985 (0.967-1.003)        | 0.64          | 0.980 (0.946-1.015) |
| <b>Mean Diastolic Blood Pressure continuous (per 10mmHg increase)</b>            | 5848   | 112591                               | 1.000 (0.975-1.025) | 1.012 (0.986-1.038) | 1.011 (0.984-1.038) |               |               | 1.014 (0.971-1.058)         | 1.005 (0.973-1.037)        | 0.813         | 0.986 (0.933-1.043) |
| <b>Mean Blood Pressure (1/3SBP+2/3DBP) continuous (per 10mmHg increase)</b>      | 5848   | 112591                               | 0.988 (0.967-1.010) | 1.001 (0.979-1.023) | 0.998 (0.976-1.021) |               |               | 1.009 (0.973-1.047)         | 0.991 (0.964-1.019)        | 0.71          | 0.979 (0.931-1.030) |
| <b>Systolic Blood Pressure (mmHg) ESH classification</b>                         |        |                                      |                     |                     |                     |               |               |                             |                            |               |                     |
| < 120                                                                            | 720    | 20680                                | 1 (referent)        | 1 (referent)        | 1 (referent)        |               |               | 1 (referent)                | 1 (referent)               |               | 1 (referent)        |
| 120-129                                                                          | 1113   | 25502                                | 1.01 (0.92-1.11)    | 1.02 (0.93-1.13)    | 1.02 (0.93-1.12)    |               |               | 1.00 (0.88-1.15)            | 1.04 (0.91-1.19)           |               | 1.03 (0.88-1.20)    |
| 130-139                                                                          | 1226   | 24067                                | 0.98 (0.90-1.08)    | 1.01 (0.92-1.11)    | 1.01 (0.91-1.11)    |               |               | 0.99 (0.86-1.13)            | 1.01 (0.88-1.15)           |               | 0.91 (0.77-1.08)    |
| 140-159                                                                          | 1950   | 30067                                | 0.99 (0.91-1.08)    | 1.03 (0.94-1.12)    | 1.02 (0.93-1.11)    |               |               | 1.09 (0.95-1.24)            | 0.98 (0.87-1.12)           | 0.517         | 0.94 (0.79-1.11)    |
| 160-179                                                                          | 629    | 9590                                 | 0.86 (0.77-0.96)    | 0.91 (0.81-1.02)    | 0.89 (0.79-1.00)    |               |               | 0.90 (0.75-1.09)            | 0.89 (0.77-1.03)           |               | 0.97 (0.74-1.26)    |
| >= 180                                                                           | 210    | 2685                                 | 1.01 (0.86-1.18)    | 1.07 (0.91-1.26)    | 1.06 (0.90-1.24)    |               |               | 1.12 (0.84-1.49)            | 1.03 (0.84-1.25)           |               | 1.00 (0.61-1.65)    |
| p-trend                                                                          |        |                                      | 0.062               | 0.52                | 0.352               |               |               | 0.604                       | 0.122                      |               | 0.363               |
| <b>Diastolic Blood Pressure (mmHg) ESH classification</b>                        |        |                                      |                     |                     |                     |               |               |                             |                            |               |                     |
| < 80                                                                             | 1631   | 36238                                | 1 (referent)        | 1 (referent)        | 1 (referent)        |               |               | 1 (referent)                | 1 (referent)               |               | 1 (referent)        |
| 80-84                                                                            | 1244   | 25813                                | 0.94 (0.87-1.01)    | 0.95 (0.88-1.02)    | 0.94 (0.88-1.02)    |               |               | 0.91 (0.81-1.02)            | 0.96 (0.87-1.06)           |               | 0.84 (0.72-0.98)    |
| 85-89                                                                            | 1002   | 17544                                | 0.98 (0.91-1.06)    | 1.00 (0.92-1.09)    | 1.00 (0.92-1.08)    |               |               | 1.10 (0.97-1.25)            | 0.94 (0.85-1.04)           |               | 0.97 (0.83-1.14)    |
| 90-99                                                                            | 1389   | 23997                                | 0.93 (0.87-1.00)    | 0.96 (0.89-1.03)    | 0.95 (0.88-1.03)    |               |               | 0.94 (0.83-1.07)            | 0.95 (0.86-1.04)           | 0.448         | 0.85 (0.72-1.00)    |
| 100-109                                                                          | 455    | 7176                                 | 0.98 (0.88-1.09)    | 1.01 (0.91-1.13)    | 1.00 (0.90-1.12)    |               |               | 1.06 (0.87-1.29)            | 0.98 (0.86-1.11)           |               | 1.10 (0.87-1.38)    |
| >= 110                                                                           | 127    | 1823                                 | 1.12 (0.94-1.34)    | 1.16 (0.97-1.40)    | 1.20 (1.00-1.44)    |               |               | 1.45 (1.01-2.06)            | 1.06 (0.86-1.31)           |               | 1.05 (0.68-1.62)    |
| p-trend                                                                          |        |                                      | 0.663               | 0.668               | 0.731               |               |               | 0.413                       | 0.684                      |               | 0.748               |
| <b>Systolic Blood Pressure (mmHg) ASH classification</b>                         |        |                                      |                     |                     |                     |               |               |                             |                            |               |                     |
| < 120                                                                            | 720    | 20680                                | 1 (referent)        | 1 (referent)        | 1 (referent)        |               |               | 1 (referent)                | 1 (referent)               |               | 1 (referent)        |
| 120-139                                                                          | 2339   | 49569                                | 1.00 (0.92-1.09)    | 1.02 (0.93-1.11)    | 1.01 (0.93-1.10)    |               |               | 0.99 (0.88-1.12)            | 1.02 (0.90-1.16)           |               | 0.98 (0.84-1.13)    |
| 140-159                                                                          | 1950   | 30067                                | 0.99 (0.91-1.08)    | 1.03 (0.94-1.12)    | 1.02 (0.93-1.11)    |               |               | 1.09 (0.95-1.24)            | 0.98 (0.87-1.12)           | 0.541         | 0.94 (0.79-1.12)    |
| >= 160                                                                           | 839    | 12275                                | 0.89 (0.81-0.99)    | 0.94 (0.85-1.05)    | 0.93 (0.83-1.03)    |               |               | 0.95 (0.80-1.12)            | 0.92 (0.80-1.06)           |               | 0.98 (0.77-1.26)    |
| p-trend                                                                          |        |                                      | 0.034               | 0.34                | 0.199               |               |               | 0.733                       | 0.079                      |               | 0.626               |
| <b>Diastolic Blood Pressure (mmHg) ASH classification</b>                        |        |                                      |                     |                     |                     |               |               |                             |                            |               |                     |
| < 80                                                                             | 1631   | 36238                                | 1 (referent)        | 1 (referent)        | 1 (referent)        |               |               | 1 (referent)                | 1 (referent)               |               | 1 (referent)        |
| 80-89                                                                            | 2246   | 43357                                | 0.96 (0.90-1.02)    | 0.97 (0.91-1.04)    | 0.97 (0.91-1.03)    |               |               | 0.99 (0.89-1.09)            | 0.95 (0.87-1.04)           |               | 0.89 (0.79-1.02)    |
| 90-99                                                                            | 1389   | 23997                                | 0.93 (0.87-1.00)    | 0.96 (0.89-1.03)    | 0.95 (0.88-1.03)    |               |               | 0.94 (0.83-1.07)            | 0.95 (0.86-1.04)           | 0.831         | 0.85 (0.72-0.99)    |
| >= 100                                                                           | 582    | 8999                                 | 1.01 (0.92-1.11)    | 1.04 (0.95-1.15)    | 1.04 (0.94-1.15)    |               |               | 1.12 (0.94-1.34)            | 0.99 (0.88-1.12)           |               | 1.09 (0.88-1.34)    |
| p-trend                                                                          |        |                                      | 0.452               | 0.934               | 0.972               |               |               | 0.87                        | 0.722                      |               | 0.544               |
| <b>Mean BP (mmHg) (1/3SBP+2/3DBP) Cohort-specific quartiles</b>                  |        |                                      |                     |                     |                     |               |               |                             |                            |               |                     |
| 50.0-88.3                                                                        | 673    | 17721                                | 1 (referent)        | 1 (referent)        | 1 (referent)        |               |               | 1 (referent)                | 1 (referent)               |               | 1 (referent)        |
| 88.5-96.6                                                                        | 1233   | 28406                                | 0.93 (0.85-1.02)    | 0.94 (0.85-1.03)    | 0.94 (0.85-1.03)    |               |               | 0.88 (0.77-1.01)            | 0.99 (0.86-1.14)           |               | 0.95 (0.80-1.12)    |
| 96.8-105.5                                                                       | 1702   | 31346                                | 0.95 (0.86-1.04)    | 0.97 (0.88-1.06)    | 0.97 (0.88-1.06)    |               |               | 0.96 (0.85-1.10)            | 0.97 (0.85-1.11)           | 0.608         | 0.87 (0.73-1.03)    |
| 105.6-216.6                                                                      | 2240   | 35118                                | 0.92 (0.84-1.00)    | 0.96 (0.87-1.05)    | 0.95 (0.86-1.04)    |               |               | 0.96 (0.84-1.10)            | 0.95 (0.84-1.08)           |               | 0.91 (0.76-1.08)    |
| p-trend                                                                          |        |                                      | 0.133               | 0.681               | 0.525               |               |               | 0.833                       | 0.289                      |               | 0.205               |
| <b>Hypertension (SBP &gt;= 140 mmHg, or DBP &gt;= 90 mmHg, or self-reported)</b> |        |                                      |                     |                     |                     |               |               |                             |                            |               |                     |
| Normotensive                                                                     | 2472   | 56915                                | 1 (referent)        | 1 (referent)        | 1 (referent)        |               |               | 1 (referent)                | 1 (referent)               |               | 1 (referent)        |
| Hypertensive                                                                     | 3376   | 55676                                | 0.98 (0.93-1.04)    | 1.01 (0.96-1.07)    | 1.00 (0.95-1.06)    |               |               | 1.07 (0.98-1.16)            | 0.97 (0.90-1.04)           | 0.263         | 0.95 (0.85-1.06)    |

| Age > 53 yrs        | Age           | Never smokers       | Ever smokers        | Smoking       | Alcohol <= 12g      | Alcohol > 12g       | Alcohol       | No antihypertensive treatment | Antihypertensive treatment | Treatment     | Prostate                                                             |
|---------------------|---------------|---------------------|---------------------|---------------|---------------------|---------------------|---------------|-------------------------------|----------------------------|---------------|----------------------------------------------------------------------|
| HR (adjusted)       | p-interaction | HR (adjusted)       | HR (adjusted)       | p-interaction | HR (adjusted)       | HR (adjusted)       | p-interaction | HR (adjusted)                 | HR (adjusted)              | p-interaction |                                                                      |
| 4509<br>58357       |               | 1937<br>35854       | 3850<br>74868       |               | 2902<br>56044       | 2946<br>56547       |               | 3862<br>80227                 | 844<br>13281               |               | Cases<br>Cohort size                                                 |
| 0.997 (0.980-1.013) | 0.346         | 0.973 (0.948-0.999) | 1.002 (0.984-1.020) | 0.06          | 0.989 (0.969-1.011) | 0.994 (0.974-1.015) | 0.586         | 0.988 (0.969-1.008)           | 0.976 (0.940-1.014)        | 0.501         | Mean Systolic Blood Pressure continuous (per 10mmHg increase)        |
| 1.020 (0.990-1.050) | 0.247         | 0.979 (0.935-1.025) | 1.026 (0.994-1.059) | 0.095         | 1.003 (0.967-1.041) | 1.015 (0.979-1.053) | 0.692         | 0.995 (0.962-1.030)           | 0.999 (0.930-1.072)        | 0.764         | Mean Diastolic Blood Pressure continuous (per 10mmHg increase)       |
| 1.007 (0.982-1.032) | 0.278         | 0.969 (0.931-1.009) | 1.014 (0.987-1.042) | 0.058         | 0.994 (0.963-1.026) | 1.003 (0.972-1.035) | 0.626         | 0.989 (0.960-1.019)           | 0.979 (0.920-1.040)        | 0.566         | Mean Blood Pressure (1/3SBP+2/3DBP) continuous (per 10mmHg increase) |
| 1 (referent)        |               | 1 (referent)        | 1 (referent)        |               | 1 (referent)        | 1 (referent)        |               | 1 (referent)                  | 1 (referent)               |               | Systolic Blood Pressure (mmHg) ESH classification                    |
| 1.03 (0.92-1.16)    |               | 1.13 (0.96-1.33)    | 0.98 (0.87-1.10)    |               | 1.06 (0.93-1.21)    | 0.99 (0.86-1.14)    |               | 1.02 (0.92-1.13)              | 1.06 (0.65-1.72)           |               | < 120                                                                |
| 1.05 (0.94-1.18)    |               | 1.11 (0.94-1.30)    | 0.97 (0.86-1.09)    |               | 1.03 (0.90-1.17)    | 0.98 (0.86-1.13)    |               | 0.98 (0.88-1.10)              | 1.14 (0.73-1.78)           |               | 120-129                                                              |
| 1.06 (0.96-1.19)    | 0.39          | 1.06 (0.90-1.24)    | 1.01 (0.91-1.13)    | 0.147         | 1.03 (0.91-1.17)    | 1.01 (0.89-1.15)    | 0.814         | 1.02 (0.91-1.13)              | 1.07 (0.69-1.64)           | 0.266         | 130-139                                                              |
| 0.92 (0.81-1.05)    |               | 0.90 (0.74-1.11)    | 0.91 (0.79-1.04)    |               | 0.94 (0.80-1.10)    | 0.86 (0.73-1.01)    |               | 0.88 (0.76-1.02)              | 0.87 (0.56-1.36)           |               | 140-159                                                              |
| 1.10 (0.93-1.31)    |               | 0.87 (0.64-1.20)    | 1.14 (0.95-1.37)    |               | 1.02 (0.81-1.30)    | 1.09 (0.88-1.35)    |               | 1.01 (0.80-1.29)              | 1.00 (0.62-1.62)           |               | 160-179                                                              |
| 0.852               |               | 0.154               | 0.857               |               | 0.533               | 0.581               |               | 0.404                         | 0.153                      |               | >= 180<br>p-trend                                                    |
| 1 (referent)        |               | 1 (referent)        | 1 (referent)        |               | 1 (referent)        | 1 (referent)        |               | 1 (referent)                  | 1 (referent)               |               | Diastolic Blood Pressure (mmHg) ESH classification                   |
| 0.99 (0.91-1.08)    |               | 0.95 (0.84-1.08)    | 0.95 (0.86-1.04)    |               | 0.91 (0.82-1.02)    | 0.98 (0.88-1.09)    |               | 0.92 (0.84-1.00)              | 1.06 (0.78-1.43)           |               | < 80                                                                 |
| 1.02 (0.93-1.12)    |               | 1.08 (0.94-1.24)    | 0.96 (0.87-1.06)    |               | 0.96 (0.85-1.07)    | 1.04 (0.93-1.17)    |               | 0.97 (0.88-1.07)              | 0.94 (0.69-1.26)           |               | 80-84                                                                |
| 1.00 (0.92-1.09)    | 0.44          | 0.91 (0.79-1.03)    | 0.98 (0.89-1.07)    | 0.075         | 0.95 (0.86-1.06)    | 0.96 (0.86-1.06)    | 0.711         | 0.94 (0.85-1.03)              | 0.99 (0.76-1.29)           | 0.747         | 85-89                                                                |
| 1.00 (0.89-1.13)    |               | 0.89 (0.74-1.09)    | 1.06 (0.94-1.21)    |               | 0.99 (0.84-1.15)    | 1.03 (0.89-1.19)    |               | 1.00 (0.86-1.16)              | 1.03 (0.77-1.38)           |               | 90-99                                                                |
| 1.20 (0.98-1.47)    |               | 0.92 (0.65-1.31)    | 1.29 (1.04-1.60)    |               | 1.05 (0.80-1.37)    | 1.26 (0.98-1.62)    |               | 1.16 (0.87-1.55)              | 0.98 (0.66-1.46)           |               | 100-109                                                              |
| 0.481               |               | 0.201               | 0.205               |               | 0.892               | 0.631               |               | 0.77                          | 0.939                      |               | >= 110<br>p-trend                                                    |
| 1 (referent)        |               | 1 (referent)        | 1 (referent)        |               | 1 (referent)        | 1 (referent)        |               | 1 (referent)                  | 1 (referent)               |               | Systolic Blood Pressure (mmHg) ASH classification                    |
| 1.04 (0.94-1.16)    |               | 1.12 (0.97-1.29)    | 0.97 (0.87-1.08)    |               | 1.04 (0.93-1.17)    | 0.99 (0.87-1.12)    |               | 1.00 (0.91-1.10)              | 1.11 (0.72-1.72)           |               | < 120                                                                |
| 1.06 (0.95-1.18)    | 0.806         | 1.06 (0.90-1.24)    | 1.01 (0.91-1.13)    | 0.171         | 1.03 (0.91-1.17)    | 1.01 (0.89-1.15)    | 0.987         | 1.02 (0.92-1.13)              | 1.07 (0.69-1.64)           | 0.136         | 120-139                                                              |
| 0.96 (0.85-1.08)    |               | 0.90 (0.74-1.09)    | 0.96 (0.84-1.09)    |               | 0.96 (0.83-1.11)    | 0.91 (0.78-1.06)    |               | 0.91 (0.79-1.04)              | 0.90 (0.58-1.40)           |               | 140-159                                                              |
| 0.444               |               | 0.128               | 0.873               |               | 0.497               | 0.345               |               | 0.371                         | 0.054                      |               | >= 160<br>p-trend                                                    |
| 1 (referent)        |               | 1 (referent)        | 1 (referent)        |               | 1 (referent)        | 1 (referent)        |               | 1 (referent)                  | 1 (referent)               |               | Diastolic Blood Pressure (mmHg) ASH classification                   |
| 1.00 (0.93-1.08)    |               | 1.01 (0.90-1.13)    | 0.95 (0.88-1.03)    |               | 0.93 (0.85-1.02)    | 1.01 (0.92-1.11)    |               | 0.94 (0.87-1.01)              | 0.99 (0.76-1.30)           |               | < 80                                                                 |
| 1.00 (0.92-1.09)    | 0.358         | 0.90 (0.79-1.03)    | 0.98 (0.89-1.07)    | 0.037         | 0.95 (0.86-1.06)    | 0.96 (0.86-1.06)    | 0.764         | 0.94 (0.85-1.03)              | 0.99 (0.76-1.29)           | 0.913         | 80-89                                                                |
| 1.04 (0.93-1.16)    |               | 0.90 (0.75-1.07)    | 1.11 (0.98-1.25)    |               | 1.00 (0.87-1.15)    | 1.07 (0.93-1.23)    |               | 1.02 (0.89-1.18)              | 1.02 (0.77-1.35)           |               | 90-99                                                                |
| 0.637               |               | 0.081               | 0.246               |               | 0.739               | 0.852               |               | 0.532                         | 0.844                      |               | >= 100<br>p-trend                                                    |
| 1 (referent)        |               | 1 (referent)        | 1 (referent)        |               | 1 (referent)        | 1 (referent)        |               | 1 (referent)                  | 1 (referent)               |               | Mean BP (mmHg) (1/3SBP+2/3DBP) Cohort-specific quartiles             |
| 0.94 (0.84-1.06)    |               | 1.03 (0.87-1.21)    | 0.91 (0.81-1.02)    |               | 0.98 (0.86-1.11)    | 0.89 (0.77-1.03)    |               | 0.92 (0.83-1.02)              | 0.83 (0.49-1.41)           |               | 50.0-88.3                                                            |
| 1.01 (0.90-1.13)    | 0.174         | 1.04 (0.88-1.21)    | 0.94 (0.84-1.05)    | 0.346         | 0.97 (0.86-1.10)    | 0.95 (0.83-1.09)    | 0.967         | 0.94 (0.85-1.04)              | 0.93 (0.57-1.50)           | 0.62          | 88.5-96.6                                                            |
| 0.98 (0.88-1.09)    |               | 0.95 (0.81-1.12)    | 0.96 (0.86-1.07)    |               | 0.98 (0.86-1.11)    | 0.92 (0.80-1.05)    |               | 0.91 (0.82-1.02)              | 0.86 (0.54-1.38)           |               | 96.6-105.5                                                           |
| 0.765               |               | 0.333               | 0.935               |               | 0.749               | 0.588               |               | 0.236                         | 0.607                      |               | 105.6-216.6<br>p-trend                                               |
| 1 (referent)        |               | 1 (referent)        | 1 (referent)        |               | 1 (referent)        | 1 (referent)        |               | -                             | -                          |               | Hypertension (SBP >= 140 mmHg, or DBP >= 90 mmHg, or self-reported)  |
| 1.03 (0.97-1.10)    | 0.167         | 0.95 (0.86-1.05)    | 1.04 (0.97-1.11)    | 0.111         | 1.01 (0.93-1.09)    | 1.00 (0.93-1.09)    | 0.942         | 1 (referent)                  | 1.08 (0.99-1.17)           |               | Normotensive<br>Hypertensive                                         |

| Breast                                                               | Cases | Cohort | Excluding first 2 years of follow-up |                     |                     | Men           | Women         | Sex                 | BMI <= 25 mg/m <sup>2</sup> | BMI > 25 mg/m <sup>2</sup> | BMI           | Age <= 53 yrs       |
|----------------------------------------------------------------------|-------|--------|--------------------------------------|---------------------|---------------------|---------------|---------------|---------------------|-----------------------------|----------------------------|---------------|---------------------|
|                                                                      |       |        | HR (crude)                           | HR (adjusted)       | HR (adjusted)       | HR (adjusted) | HR (adjusted) | p-interaction       | HR (adjusted)               | HR (adjusted)              | p-interaction | HR (adjusted)       |
| Cases                                                                |       |        | 8154                                 | 8154                | 7209                |               |               |                     | 4289                        | 3865                       |               | 3574                |
| Cohort size                                                          |       |        | 194727                               | 194727              | 191551              |               |               |                     | 104416                      | 90311                      |               | 99069               |
| Mean Systolic Blood Pressure continuous (per 10mmHg increase)        | 8154  | 194727 | 1.030 (1.018-1.043)                  | 1.026 (1.014-1.039) | 1.025 (1.012-1.039) |               |               | 1.034 (1.016-1.052) | 1.021 (1.004-1.039)         | 0.524                      |               | 1.031 (1.010-1.052) |
| Mean Diastolic Blood Pressure continuous (per 10mmHg increase)       | 8154  | 194727 | 1.039 (1.017-1.061)                  | 1.033 (1.010-1.056) | 1.036 (1.012-1.061) |               |               | 1.038 (1.006-1.071) | 1.033 (1.001-1.065)         | 0.401                      |               | 1.035 (1.000-1.071) |
| Mean Blood Pressure (1/3SBP+2/3DBP) continuous (per 10mmHg increase) | 8154  | 194727 | 1.042 (1.024-1.061)                  | 1.036 (1.017-1.056) | 1.038 (1.017-1.059) |               |               | 1.045 (1.017-1.073) | 1.033 (1.006-1.061)         | 0.403                      |               | 1.040 (1.009-1.072) |
| Systolic Blood Pressure (mmHg) ESH classification                    |       |        |                                      |                     |                     |               |               |                     |                             |                            |               |                     |
| < 120                                                                | 2222  | 65461  | 1 (referent)                         | 1 (referent)        | 1 (referent)        |               |               | 1 (referent)        | 1 (referent)                |                            |               | 1 (referent)        |
| 120-129                                                              | 1713  | 40944  | 1.09 (1.02-1.16)                     | 1.07 (1.01-1.15)    | 1.09 (1.01-1.16)    |               |               | 1.11 (1.03-1.21)    | 1.04 (0.93-1.15)            |                            |               | 1.12 (1.02-1.22)    |
| 130-139                                                              | 1554  | 33415  | 1.15 (1.07-1.23)                     | 1.13 (1.05-1.21)    | 1.11 (1.03-1.19)    |               |               | 1.18 (1.07-1.29)    | 1.08 (0.98-1.20)            |                            |               | 1.14 (1.03-1.26)    |
| 140-159                                                              | 1836  | 38168  | 1.13 (1.06-1.21)                     | 1.10 (1.03-1.18)    | 1.11 (1.04-1.20)    |               |               | 1.08 (0.98-1.19)    | 1.12 (1.01-1.24)            | 0.215                      |               | 1.10 (0.98-1.22)    |
| 160-179                                                              | 629   | 13066  | 1.15 (1.04-1.26)                     | 1.12 (1.02-1.24)    | 1.12 (1.01-1.24)    |               |               | 1.26 (1.09-1.45)    | 1.05 (0.92-1.19)            |                            |               | 1.17 (0.97-1.41)    |
| >= 180                                                               | 200   | 3673   | 1.33 (1.14-1.54)                     | 1.29 (1.11-1.50)    | 1.31 (1.12-1.54)    |               |               | 1.15 (0.87-1.51)    | 1.34 (1.11-1.62)            |                            |               | 1.32 (0.92-1.90)    |
| p-trend                                                              |       |        | 0.000005                             | 0.0002              | 0.0004              |               |               | 0.003               | 0.011                       |                            |               | 0.009               |
| Diastolic Blood Pressure (mmHg) ESH classification                   |       |        |                                      |                     |                     |               |               |                     |                             |                            |               |                     |
| < 80                                                                 | 3764  | 96352  | 1 (referent)                         | 1 (referent)        | 1 (referent)        |               |               | 1 (referent)        | 1 (referent)                |                            |               | 1 (referent)        |
| 80-84                                                                | 1637  | 39059  | 0.99 (0.94-1.05)                     | 0.99 (0.93-1.05)    | 0.98 (0.92-1.05)    |               |               | 0.97 (0.89-1.05)    | 1.01 (0.92-1.10)            |                            |               | 1.00 (0.91-1.09)    |
| 85-89                                                                | 1094  | 23956  | 1.05 (0.98-1.12)                     | 1.03 (0.97-1.11)    | 1.05 (0.97-1.13)    |               |               | 1.11 (1.00-1.22)    | 0.98 (0.89-1.08)            |                            |               | 1.01 (0.90-1.13)    |
| 90-99                                                                | 1253  | 27199  | 1.06 (1.00-1.14)                     | 1.05 (0.98-1.12)    | 1.05 (0.98-1.13)    |               |               | 1.03 (0.93-1.15)    | 1.06 (0.97-1.16)            | 0.51                       |               | 1.12 (1.00-1.25)    |
| 100-109                                                              | 328   | 6720   | 1.14 (1.02-1.28)                     | 1.13 (1.00-1.26)    | 1.14 (1.01-1.28)    |               |               | 1.15 (0.94-1.39)    | 1.12 (0.97-1.29)            |                            |               | 1.04 (0.84-1.29)    |
| >= 110                                                               | 78    | 1441   | 1.32 (1.05-1.65)                     | 1.30 (1.04-1.63)    | 1.41 (1.12-1.78)    |               |               | 1.46 (0.97-2.21)    | 1.25 (0.95-1.64)            |                            |               | 1.56 (1.07-2.27)    |
| p-trend                                                              |       |        | 0.001                                | 0.008               | 0.004               |               |               | 0.038               | 0.058                       |                            |               | 0.035               |
| Systolic Blood Pressure (mmHg) ASH classification                    |       |        |                                      |                     |                     |               |               |                     |                             |                            |               |                     |
| < 120                                                                | 2222  | 65461  | 1 (referent)                         | 1 (referent)        | 1 (referent)        |               |               | 1 (referent)        | 1 (referent)                |                            |               | 1 (referent)        |
| 120-139                                                              | 3267  | 74359  | 1.11 (1.05-1.18)                     | 1.10 (1.04-1.16)    | 1.09 (1.03-1.16)    |               |               | 1.14 (1.06-1.22)    | 1.06 (0.97-1.16)            |                            |               | 1.13 (1.04-1.21)    |
| 140-159                                                              | 1836  | 38168  | 1.13 (1.05-1.20)                     | 1.10 (1.03-1.18)    | 1.11 (1.03-1.19)    |               |               | 1.08 (0.98-1.18)    | 1.12 (1.01-1.23)            | 0.377                      |               | 1.10 (0.98-1.22)    |
| >= 160                                                               | 829   | 16739  | 1.18 (1.09-1.29)                     | 1.16 (1.06-1.26)    | 1.16 (1.05-1.27)    |               |               | 1.23 (1.08-1.41)    | 1.11 (0.98-1.25)            |                            |               | 1.19 (1.01-1.42)    |
| p-trend                                                              |       |        | 0.00003                              | 0.0008              | 0.0009              |               |               | 0.003               | 0.041                       |                            |               | 0.008               |
| Diastolic Blood Pressure (mmHg) ASH classification                   |       |        |                                      |                     |                     |               |               |                     |                             |                            |               |                     |
| < 80                                                                 | 3764  | 96352  | 1 (referent)                         | 1 (referent)        | 1 (referent)        |               |               | 1 (referent)        | 1 (referent)                |                            |               | 1 (referent)        |
| 80-89                                                                | 2731  | 63015  | 1.02 (0.97-1.07)                     | 1.00 (0.95-1.06)    | 1.01 (0.95-1.06)    |               |               | 1.02 (0.95-1.09)    | 1.00 (0.92-1.08)            |                            |               | 1.00 (0.93-1.08)    |
| 90-99                                                                | 1253  | 27199  | 1.06 (1.00-1.14)                     | 1.05 (0.98-1.12)    | 1.05 (0.98-1.13)    |               |               | 1.03 (0.93-1.15)    | 1.06 (0.97-1.16)            | 0.258                      |               | 1.12 (1.00-1.25)    |
| >= 100                                                               | 406   | 8161   | 1.17 (1.05-1.30)                     | 1.15 (1.04-1.28)    | 1.18 (1.06-1.32)    |               |               | 1.19 (1.00-1.42)    | 1.14 (1.00-1.30)            |                            |               | 1.13 (0.94-1.36)    |
| p-trend                                                              |       |        | 0.004                                | 0.017               | 0.011               |               |               | 0.123               | 0.045                       |                            |               | 0.052               |
| Mean BP (mmHg) (1/3SBP+2/3DBP) Cohort-specific quartiles             |       |        |                                      |                     |                     |               |               |                     |                             |                            |               |                     |
| 50.0-88.3                                                            | 2032  | 59270  | 1 (referent)                         | 1 (referent)        | 1 (referent)        |               |               | 1 (referent)        | 1 (referent)                |                            |               | 1 (referent)        |
| 88.5-96.6                                                            | 2090  | 49321  | 1.10 (1.03-1.17)                     | 1.09 (1.02-1.16)    | 1.09 (1.02-1.16)    |               |               | 1.11 (1.03-1.20)    | 1.07 (0.96-1.18)            |                            |               | 1.11 (1.02-1.21)    |
| 96.8-105.5                                                           | 2044  | 44981  | 1.12 (1.05-1.20)                     | 1.10 (1.03-1.18)    | 1.10 (1.03-1.18)    |               |               | 1.13 (1.03-1.23)    | 1.09 (0.98-1.20)            | 0.628                      |               | 1.08 (0.98-1.19)    |
| 105.6-216.6                                                          | 1988  | 41155  | 1.16 (1.09-1.24)                     | 1.14 (1.06-1.22)    | 1.14 (1.06-1.23)    |               |               | 1.17 (1.07-1.29)    | 1.11 (1.00-1.23)            |                            |               | 1.18 (1.06-1.31)    |
| p-trend                                                              |       |        | 0.00001                              | 0.0003              | 0.0006              |               |               | 0.0006              | 0.055                       |                            |               | 0.005               |
| Hypertension (SBP >= 140 mmHg, or DBP >= 90 mmHg, or self-reported)  |       |        |                                      |                     |                     |               |               |                     |                             |                            |               |                     |
| Normotensive                                                         | 4645  | 117264 | 1 (referent)                         | 1 (referent)        | 1 (referent)        |               |               | 1 (referent)        | 1 (referent)                |                            |               | 1 (referent)        |
| Hypertensive                                                         | 3509  | 77463  | 1.05 (1.00-1.10)                     | 1.03 (0.98-1.08)    | 1.04 (0.99-1.09)    |               |               | 1.03 (0.97-1.11)    | 1.04 (0.97-1.11)            | 0.183                      |               | 1.02 (0.94-1.10)    |



| Breast Pre Menopausal                                                            |        | Excluding first 2 years of follow-up |                     |                     | Men                 | Women         | Sex           | BMI <= 25 mg/m <sup>2</sup> | BMI > 25 mg/m <sup>2</sup> | BMI           | Age <= 53 yrs |
|----------------------------------------------------------------------------------|--------|--------------------------------------|---------------------|---------------------|---------------------|---------------|---------------|-----------------------------|----------------------------|---------------|---------------|
| Cases                                                                            | Cohort | HR (crude)                           | HR (adjusted)       | HR (adjusted)       | HR (adjusted)       | HR (adjusted) | p-interaction | HR (adjusted)               | HR (adjusted)              | p-interaction | HR (adjusted) |
| Cases                                                                            |        | 256                                  | 256                 | 196                 |                     |               |               | 199                         | 57                         |               |               |
| Cohort size                                                                      |        | 40846                                | 40846               | 40429               |                     |               |               | 27045                       | 13801                      |               |               |
| <b>Mean Systolic Blood Pressure continuous (per 10mmHg increase)</b>             | 256    | 40846                                | 1.036 (0.942-1.139) | 1.068 (0.967-1.180) | 1.096 (0.980-1.227) |               |               | 1.064 (0.948-1.195)         | 1.098 (0.905-1.332)        | 0.982         |               |
| <b>Mean Diastolic Blood Pressure continuous (per 10mmHg increase)</b>            | 256    | 40846                                | 1.017 (0.891-1.162) | 1.056 (0.919-1.213) | 1.090 (0.931-1.277) |               |               | 1.119 (0.955-1.310)         | 0.905 (0.677-1.208)        | 0.151         |               |
| <b>Mean Blood Pressure (1/3SBP+2/3DBP) continuous (per 10mmHg increase)</b>      | 256    | 40846                                | 1.031 (0.909-1.170) | 1.074 (0.942-1.226) | 1.113 (0.958-1.293) |               |               | 1.111 (0.955-1.293)         | 0.999 (0.761-1.310)        | 0.36          |               |
| <b>Systolic Blood Pressure (mmHg) ESH classification</b>                         |        |                                      |                     |                     |                     |               |               |                             |                            |               |               |
| < 120                                                                            | 171    | 25098                                | 1 (referent)        | 1 (referent)        | 1 (referent)        |               |               | 1 (referent)                | 1 (referent)               |               |               |
| 120-129                                                                          | 45     | 9105                                 | 0.78 (0.56-1.09)    | 0.81 (0.58-1.13)    | 0.84 (0.57-1.23)    |               |               | 0.93 (0.64-1.34)            | 0.49 (0.23-1.05)           |               |               |
| 130-139                                                                          | 28     | 4158                                 | 1.21 (0.81-1.81)    | 1.31 (0.86-1.97)    | 1.32 (0.82-2.12)    |               |               | 1.35 (0.82-2.22)            | 1.17 (0.56-2.48)           |               |               |
| 140-159                                                                          | 9      | 2113                                 | 0.86 (0.44-1.68)    | 0.94 (0.47-1.86)    | 1.15 (0.55-2.39)    |               |               | 1.31 (0.61-2.84)            | 0.47 (0.11-2.00)           | 0.341         |               |
| 160-179                                                                          | 2      | 307                                  | 1.49 (0.37-6.02)    | 1.78 (0.44-7.30)    | 2.33 (0.56-9.64)    |               |               | no cases                    | 2.74 (0.62-12.18)          |               |               |
| >= 180                                                                           | 1      | 65                                   | 3.86 (0.54-27.72)   | 4.46 (0.61-32.36)   | 6.83 (0.94-49.76)   |               |               | 9.29 (1.21-71.13)           | no cases                   |               |               |
| p-trend                                                                          |        |                                      | 0.81                | 0.476               | 0.224               |               |               | 0.258                       | 0.875                      |               |               |
| <b>Diastolic Blood Pressure (mmHg) ESH classification</b>                        |        |                                      |                     |                     |                     |               |               |                             |                            |               |               |
| < 80                                                                             | 182    | 27336                                | 1 (referent)        | 1 (referent)        | 1 (referent)        |               |               | 1 (referent)                | 1 (referent)               |               |               |
| 80-84                                                                            | 40     | 7021                                 | 0.93 (0.66-1.31)    | 0.96 (0.68-1.37)    | 0.88 (0.58-1.34)    |               |               | 1.00 (0.66-1.50)            | 0.85 (0.42-1.70)           |               |               |
| 85-89                                                                            | 16     | 3151                                 | 0.92 (0.55-1.53)    | 0.98 (0.58-1.65)    | 1.17 (0.67-2.06)    |               |               | 0.98 (0.51-1.88)            | 0.91 (0.37-2.25)           |               |               |
| 90-99                                                                            | 14     | 2703                                 | 1.01 (0.58-1.75)    | 1.11 (0.63-1.95)    | 1.27 (0.69-2.33)    |               |               | 1.47 (0.77-2.83)            | 0.66 (0.23-1.91)           | 0.041         |               |
| 100-109                                                                          | 3      | 530                                  | 1.17 (0.37-3.67)    | 1.33 (0.42-4.23)    | 1.77 (0.55-5.67)    |               |               | 2.72 (0.85-8.67)            | no cases                   |               |               |
| >= 110                                                                           | 1      | 105                                  | 2.48 (0.35-17.77)   | 2.52 (0.34-18.35)   | 3.23 (0.44-23.75)   |               |               | 5.95 (0.76-46.30)           | no cases                   |               |               |
| p-trend                                                                          |        |                                      | 0.933               | 0.607               | 0.245               |               |               | 0.107                       | 0.249                      |               |               |
| <b>Systolic Blood Pressure (mmHg) ASH classification</b>                         |        |                                      |                     |                     |                     |               |               |                             |                            |               |               |
| < 120                                                                            | 171    | 25098                                | 1 (referent)        | 1 (referent)        | 1 (referent)        |               |               | 1 (referent)                | 1 (referent)               |               |               |
| 120-139                                                                          | 73     | 13263                                | 0.90 (0.68-1.19)    | 0.94 (0.71-1.25)    | 0.97 (0.70-1.34)    |               |               | 1.03 (0.75-1.42)            | 0.71 (0.39-1.27)           |               |               |
| 140-159                                                                          | 9      | 2113                                 | 0.85 (0.43-1.68)    | 0.93 (0.47-1.84)    | 1.14 (0.55-2.37)    |               |               | 1.31 (0.61-2.83)            | 0.46 (0.11-1.99)           | 0.274         |               |
| >= 160                                                                           | 3      | 372                                  | 1.87 (0.59-5.87)    | 2.20 (0.69-7.01)    | 2.96 (0.92-9.53)    |               |               | 1.79 (0.25-12.97)           | 2.44 (0.55-10.78)          |               |               |
| p-trend                                                                          |        |                                      | 0.73                | 0.951               | 0.509               |               |               | 0.518                       | 0.502                      |               |               |
| <b>Diastolic Blood Pressure (mmHg) ASH classification</b>                        |        |                                      |                     |                     |                     |               |               |                             |                            |               |               |
| < 80                                                                             | 182    | 27336                                | 1 (referent)        | 1 (referent)        | 1 (referent)        |               |               | 1 (referent)                | 1 (referent)               |               |               |
| 80-89                                                                            | 56     | 10172                                | 0.92 (0.68-1.25)    | 0.97 (0.71-1.32)    | 0.96 (0.67-1.37)    |               |               | 0.99 (0.69-1.43)            | 0.87 (0.48-1.58)           |               |               |
| 90-99                                                                            | 14     | 2703                                 | 1.01 (0.58-1.75)    | 1.11 (0.63-1.95)    | 1.26 (0.68-2.32)    |               |               | 1.47 (0.77-2.83)            | 0.66 (0.23-1.91)           | 0.038         |               |
| >= 100                                                                           | 4      | 635                                  | 1.35 (0.50-3.64)    | 1.51 (0.55-4.13)    | 1.98 (0.72-5.48)    |               |               | 3.14 (1.14-8.63)            | no cases                   |               |               |
| p-trend                                                                          |        |                                      | 0.971               | 0.652               | 0.37                |               |               | 0.12                        | 0.22                       |               |               |
| <b>Mean BP (mmHg) (1/3SBP+2/3DBP) Cohort-specific quartiles</b>                  |        |                                      |                     |                     |                     |               |               |                             |                            |               |               |
| 50.0-88.3                                                                        | 142    | 22045                                | 1 (referent)        | 1 (referent)        | 1 (referent)        |               |               | 1 (referent)                | 1 (referent)               |               |               |
| 88.5-96.6                                                                        | 73     | 10950                                | 1.15 (0.87-1.53)    | 1.19 (0.89-1.59)    | 1.22 (0.87-1.70)    |               |               | 1.00 (0.71-1.41)            | 1.92 (1.05-3.52)           |               |               |
| 96.8-105.5                                                                       | 26     | 5433                                 | 0.95 (0.62-1.45)    | 1.03 (0.67-1.59)    | 1.03 (0.62-1.71)    |               |               | 1.17 (0.71-1.92)            | 0.84 (0.34-2.07)           | 0.298         |               |
| 105.6-216.6                                                                      | 15     | 2418                                 | 1.42 (0.83-2.44)    | 1.62 (0.92-2.82)    | 2.06 (1.14-3.72)    |               |               | 2.17 (1.15-4.10)            | 1.14 (0.37-3.46)           |               |               |
| p-trend                                                                          |        |                                      | 0.38                | 0.169               | 0.073               |               |               | 0.085                       | 0.928                      |               |               |
| <b>Hypertension (SBP &gt;= 140 mmHg, or DBP &gt;= 90 mmHg, or self-reported)</b> |        |                                      |                     |                     |                     |               |               |                             |                            |               |               |
| Normotensive                                                                     | 220    | 33368                                | 1 (referent)        | 1 (referent)        | 1 (referent)        |               |               | 1 (referent)                | 1 (referent)               |               |               |
| Hypertensive                                                                     | 36     | 7478                                 | 0.84 (0.59-1.21)    | 0.91 (0.63-1.32)    | 0.97 (0.64-1.47)    |               |               | 1.02 (0.66-1.58)            | 0.74 (0.38-1.44)           | 0.496         |               |

| Age > 53 yrs  | Age           | Never smokers                                                                                                              | Ever smokers                                                                                                       | Smoking       | Alcohol <= 12g                                                                                                              | Alcohol > 12g                                                                                                  | Alcohol       | No antihypertensive treatment | Antihypertensive treatment | Treatment     | Breast Pre Menopausal                                                                                                          |
|---------------|---------------|----------------------------------------------------------------------------------------------------------------------------|--------------------------------------------------------------------------------------------------------------------|---------------|-----------------------------------------------------------------------------------------------------------------------------|----------------------------------------------------------------------------------------------------------------|---------------|-------------------------------|----------------------------|---------------|--------------------------------------------------------------------------------------------------------------------------------|
| HR (adjusted) | p-interaction | HR (adjusted)                                                                                                              | HR (adjusted)                                                                                                      | p-interaction | HR (adjusted)                                                                                                               | HR (adjusted)                                                                                                  | p-interaction | HR (adjusted)                 | HR (adjusted)              | p-interaction |                                                                                                                                |
|               |               | 126<br>20361                                                                                                               | 125<br>19917                                                                                                       |               | 201<br>33542                                                                                                                | 55<br>7304                                                                                                     |               |                               |                            |               | Cases<br>Cohort size                                                                                                           |
|               |               | 1.062 (0.920-1.225)                                                                                                        | 1.049 (0.911-1.208)                                                                                                | 0.935         | 1.121 (1.004-1.251)                                                                                                         | 0.879 (0.696-1.110)                                                                                            | 0.042         |                               |                            |               | Mean Systolic Blood Pressure continuous (per 10mmHg increase)                                                                  |
|               |               | 1.088 (0.893-1.325)                                                                                                        | 0.997 (0.817-1.216)                                                                                                | 0.7           | 1.113 (0.952-1.300)                                                                                                         | 0.850 (0.625-1.156)                                                                                            | 0.098         |                               |                            |               | Mean Diastolic Blood Pressure continuous (per 10mmHg increase)                                                                 |
|               |               | 1.091 (0.903-1.319)                                                                                                        | 1.027 (0.850-1.240)                                                                                                | 0.775         | 1.141 (0.984-1.323)                                                                                                         | 0.840 (0.622-1.135)                                                                                            | 0.053         |                               |                            |               | Mean Blood Pressure (1/3SBP+2/3DBP) continuous (per 10mmHg increase)                                                           |
|               |               | 1 (referent)<br>0.67 (0.41-1.10)<br>1.28 (0.72-2.27)<br>0.90 (0.36-2.26)<br>1.70 (0.23-12.53)<br>8.79 (1.16-66.39)<br>0.65 | 1 (referent)<br>0.97 (0.61-1.54)<br>1.15 (0.60-2.19)<br>0.94 (0.34-2.61)<br>1.71 (0.23-12.70)<br>no cases<br>0.843 | 0.876         | 1 (referent)<br>0.93 (0.65-1.35)<br>1.38 (0.86-2.20)<br>1.12 (0.54-2.33)<br>2.50 (0.60-10.35)<br>5.87 (0.80-42.80)<br>0.152 | 1 (referent)<br>0.44 (0.18-1.06)<br>1.26 (0.51-3.07)<br>0.37 (0.05-2.77)<br>no cases<br>no cases<br>0.271      | 0.073         |                               |                            |               | Systolic Blood Pressure (mmHg)<br>ESH classification<br>< 120<br>120-129<br>130-139<br>140-159<br>160-179<br>>= 180<br>p-trend |
|               |               | 1 (referent)<br>0.80 (0.48-1.32)<br>0.95 (0.46-1.99)<br>0.72 (0.28-1.82)<br>1.63 (0.39-6.80)<br>4.35 (0.58-32.48)<br>0.905 | 1 (referent)<br>1.02 (0.61-1.70)<br>0.92 (0.42-2.03)<br>1.53 (0.75-3.14)<br>1.01 (0.14-7.35)<br>no cases<br>0.549  | 0.569         | 1 (referent)<br>0.99 (0.67-1.47)<br>1.11 (0.63-1.94)<br>1.04 (0.54-2.02)<br>1.14 (0.28-4.67)<br>3.45 (0.47-25.41)<br>0.592  | 1 (referent)<br>0.79 (0.36-1.74)<br>0.51 (0.12-2.18)<br>1.30 (0.43-3.98)<br>2.42 (0.31-19.06)<br>no cases<br>1 | 0.766         |                               |                            |               | Diastolic Blood Pressure (mmHg)<br>ESH classification<br>< 80<br>80-84<br>85-89<br>90-99<br>100-109<br>>= 110<br>p-trend       |
|               |               | 1 (referent)<br>0.83 (0.55-1.25)<br>0.88 (0.35-2.23)<br>2.81 (0.67-11.78)<br>0.816                                         | 1 (referent)<br>1.02 (0.67-1.53)<br>0.93 (0.33-2.60)<br>1.39 (0.19-10.30)<br>0.928                                 | 0.827         | 1 (referent)<br>1.05 (0.77-1.44)<br>1.11 (0.54-2.31)<br>3.06 (0.95-9.86)<br>0.326                                           | 1 (referent)<br>0.65 (0.33-1.27)<br>0.36 (0.05-2.73)<br>no cases<br>0.099                                      | 0.036         |                               |                            |               | Systolic Blood Pressure (mmHg)<br>ASH classification<br>< 120<br>120-139<br>140-159<br>>= 160<br>p-trend                       |
|               |               | 1 (referent)<br>0.84 (0.54-1.31)<br>0.72 (0.28-1.82)<br>2.05 (0.63-6.69)<br>0.772                                          | 1 (referent)<br>0.99 (0.63-1.56)<br>1.54 (0.75-3.14)<br>0.83 (0.11-6.11)<br>0.534                                  | 0.503         | 1 (referent)<br>1.03 (0.73-1.45)<br>1.04 (0.54-2.01)<br>1.46 (0.46-4.67)<br>0.672                                           | 1 (referent)<br>0.71 (0.34-1.47)<br>1.31 (0.43-3.99)<br>2.00 (0.25-15.83)<br>0.95                              | 0.855         |                               |                            |               | Diastolic Blood Pressure (mmHg)<br>ASH classification<br>< 80<br>80-89<br>90-99<br>>= 100<br>p-trend                           |
|               |               | 1 (referent)<br>1.07 (0.70-1.63)<br>1.01 (0.54-1.86)<br>1.58 (0.73-3.43)<br>0.436                                          | 1 (referent)<br>1.29 (0.86-1.95)<br>0.90 (0.47-1.74)<br>1.58 (0.70-3.56)<br>0.425                                  | 0.868         | 1 (referent)<br>1.31 (0.94-1.81)<br>1.20 (0.74-1.93)<br>1.79 (0.96-3.35)<br>0.059                                           | 1 (referent)<br>0.77 (0.39-1.50)<br>0.57 (0.19-1.66)<br>1.20 (0.34-4.18)<br>0.517                              | 0.109         |                               |                            |               | Mean BP (mmHg) (1/3SBP+2/3DBP)<br>Cohort-specific quartiles<br>50.0-88.3<br>88.5-96.6<br>96.8-105.5<br>105.6-216.6<br>p-trend  |
|               |               | 1 (referent)<br>1.00 (0.60-1.67)                                                                                           | 1 (referent)<br>0.87 (0.51-1.49)                                                                                   | 0.689         | 1 (referent)<br>0.96 (0.64-1.44)                                                                                            | 1 (referent)<br>0.71 (0.29-1.75)                                                                               | 0.508         |                               |                            |               | Hypertension (SBP >= 140 mmHg,<br>or DBP >= 90 mmHg, or self-reported)<br>Normotensive<br>Hypertensive                         |

| Breast Post Menopausal                                                           |        | Excluding first 2 years of follow-up |                     |                     | Men                 | Women         | Sex           | BMI <= 25 mg/m <sup>2</sup> | BMI > 25 mg/m <sup>2</sup> | BMI           | Age <= 53 yrs       |
|----------------------------------------------------------------------------------|--------|--------------------------------------|---------------------|---------------------|---------------------|---------------|---------------|-----------------------------|----------------------------|---------------|---------------------|
| Cases                                                                            | Cohort | HR (crude)                           | HR (adjusted)       | HR (adjusted)       | HR (adjusted)       | HR (adjusted) | p-interaction | HR (adjusted)               | HR (adjusted)              | p-interaction | HR (adjusted)       |
| Cases                                                                            |        | 4786                                 | 4786                | 4230                |                     |               |               | 2233                        | 2553                       |               | 634                 |
| Cohort size                                                                      |        | 103166                               | 103166              | 101154              |                     |               |               | 47990                       | 55176                      |               | 15014               |
| <b>Mean Systolic Blood Pressure continuous (per 10mmHg increase)</b>             | 4786   | 307318                               | 1.031 (1.016-1.046) | 1.024 (1.009-1.040) | 1.023 (1.007-1.040) |               |               | 1.037 (1.014-1.060)         | 1.018 (0.997-1.039)        | 0.328         | 1.045 (0.999-1.094) |
| <b>Mean Diastolic Blood Pressure continuous (per 10mmHg increase)</b>            | 4786   | 307318                               | 1.048 (1.019-1.077) | 1.040 (1.011-1.070) | 1.042 (1.011-1.074) |               |               | 1.037 (0.994-1.082)         | 1.048 (1.009-1.089)        | 0.497         | 1.078 (0.995-1.168) |
| <b>Mean Blood Pressure (1/3SBP+2/3DBP) continuous (per 10mmHg increase)</b>      | 4786   | 307318                               | 1.047 (1.024-1.072) | 1.039 (1.015-1.064) | 1.039 (1.013-1.065) |               |               | 1.047 (1.011-1.084)         | 1.038 (1.005-1.072)        | 0.909         | 1.071 (1.001-1.146) |
| <b>Systolic Blood Pressure (mmHg) ESH classification</b>                         |        |                                      |                     |                     |                     |               |               |                             |                            |               |                     |
| < 120                                                                            | 896    | 86141                                | 1 (referent)        | 1 (referent)        | 1 (referent)        |               |               | 1 (referent)                | 1 (referent)               |               | 1 (referent)        |
| 120-129                                                                          | 909    | 66446                                | 1.08 (0.98-1.18)    | 1.05 (0.96-1.16)    | 1.05 (0.96-1.16)    |               |               | 1.09 (0.96-1.23)            | 1.03 (0.89-1.19)           |               | 1.15 (0.93-1.43)    |
| 130-139                                                                          | 964    | 57482                                | 1.14 (1.04-1.25)    | 1.11 (1.01-1.22)    | 1.09 (0.99-1.21)    |               |               | 1.14 (1.00-1.29)            | 1.09 (0.95-1.26)           |               | 1.03 (0.81-1.31)    |
| 140-159                                                                          | 1342   | 68235                                | 1.14 (1.04-1.24)    | 1.10 (1.00-1.20)    | 1.10 (1.00-1.21)    |               |               | 1.07 (0.95-1.22)            | 1.12 (0.98-1.28)           | 0.81          | 1.18 (0.93-1.49)    |
| 160-179                                                                          | 511    | 22656                                | 1.16 (1.03-1.29)    | 1.11 (0.99-1.25)    | 1.11 (0.99-1.24)    |               |               | 1.33 (1.12-1.57)            | 1.01 (0.86-1.19)           |               | 1.33 (0.92-1.93)    |
| >= 180                                                                           | 164    | 6358                                 | 1.31 (1.10-1.55)    | 1.25 (1.05-1.49)    | 1.26 (1.05-1.51)    |               |               | 1.11 (0.81-1.51)            | 1.32 (1.07-1.64)           |               | 1.19 (0.58-2.43)    |
| p-trend                                                                          |        |                                      | 0.0003              | 0.007               | 0.012               |               |               | 0.017                       | 0.07                       |               | 0.149               |
| <b>Diastolic Blood Pressure (mmHg) ESH classification</b>                        |        |                                      |                     |                     |                     |               |               |                             |                            |               |                     |
| < 80                                                                             | 1957   | 132590                               | 1 (referent)        | 1 (referent)        | 1 (referent)        |               |               | 1 (referent)                | 1 (referent)               |               | 1 (referent)        |
| 80-84                                                                            | 989    | 64872                                | 1.00 (0.92-1.08)    | 0.98 (0.91-1.06)    | 0.98 (0.90-1.06)    |               |               | 0.97 (0.87-1.08)            | 1.01 (0.90-1.12)           |               | 0.99 (0.80-1.22)    |
| 85-89                                                                            | 714    | 41500                                | 1.07 (0.98-1.17)    | 1.05 (0.96-1.14)    | 1.05 (0.96-1.14)    |               |               | 1.12 (0.98-1.27)            | 1.01 (0.90-1.14)           |               | 0.97 (0.75-1.25)    |
| 90-99                                                                            | 838    | 51196                                | 1.06 (0.97-1.15)    | 1.04 (0.95-1.13)    | 1.04 (0.95-1.14)    |               |               | 1.00 (0.87-1.14)            | 1.07 (0.96-1.20)           | 0.555         | 1.27 (1.01-1.60)    |
| 100-109                                                                          | 240    | 13896                                | 1.18 (1.03-1.36)    | 1.17 (1.02-1.34)    | 1.16 (1.00-1.34)    |               |               | 1.26 (1.00-1.58)            | 1.13 (0.95-1.34)           |               | 1.30 (0.86-1.98)    |
| >= 110                                                                           | 48     | 3264                                 | 1.17 (0.88-1.56)    | 1.15 (0.86-1.54)    | 1.23 (0.91-1.66)    |               |               | 0.95 (0.51-1.78)            | 1.24 (0.90-1.72)           |               | 0.79 (0.25-2.47)    |
| p-trend                                                                          |        |                                      | 0.008               | 0.031               | 0.028               |               |               | 0.184                       | 0.061                      |               | 0.093               |
| <b>Systolic Blood Pressure (mmHg) ASH classification</b>                         |        |                                      |                     |                     |                     |               |               |                             |                            |               |                     |
| < 120                                                                            | 896    | 86141                                | 1 (referent)        | 1 (referent)        | 1 (referent)        |               |               | 1 (referent)                | 1 (referent)               |               | 1 (referent)        |
| 120-139                                                                          | 1873   | 123928                               | 1.11 (1.02-1.20)    | 1.08 (1.00-1.17)    | 1.07 (0.98-1.17)    |               |               | 1.11 (1.00-1.23)            | 1.06 (0.93-1.21)           |               | 1.10 (0.91-1.33)    |
| 140-159                                                                          | 1342   | 68235                                | 1.14 (1.04-1.24)    | 1.10 (1.00-1.20)    | 1.10 (1.00-1.21)    |               |               | 1.07 (0.95-1.22)            | 1.12 (0.98-1.28)           | 0.473         | 1.18 (0.93-1.49)    |
| >= 160                                                                           | 675    | 29014                                | 1.19 (1.07-1.32)    | 1.14 (1.03-1.27)    | 1.13 (1.01-1.27)    |               |               | 1.28 (1.09-1.50)            | 1.08 (0.93-1.26)           |               | 1.31 (0.93-1.84)    |
| p-trend                                                                          |        |                                      | 0.001               | 0.019               | 0.027               |               |               | 0.012                       | 0.211                      |               | 0.074               |
| <b>Diastolic Blood Pressure (mmHg) ASH classification</b>                        |        |                                      |                     |                     |                     |               |               |                             |                            |               |                     |
| < 80                                                                             | 1957   | 132590                               | 1 (referent)        | 1 (referent)        | 1 (referent)        |               |               | 1 (referent)                | 1 (referent)               |               | 1 (referent)        |
| 80-89                                                                            | 1703   | 106372                               | 1.03 (0.96-1.10)    | 1.01 (0.94-1.08)    | 1.01 (0.94-1.08)    |               |               | 1.02 (0.93-1.13)            | 1.01 (0.92-1.11)           |               | 0.98 (0.82-1.18)    |
| 90-99                                                                            | 838    | 51196                                | 1.06 (0.97-1.15)    | 1.04 (0.95-1.13)    | 1.04 (0.95-1.14)    |               |               | 1.00 (0.87-1.14)            | 1.07 (0.96-1.20)           | 0.402         | 1.27 (1.01-1.60)    |
| >= 100                                                                           | 288    | 17160                                | 1.18 (1.04-1.34)    | 1.17 (1.03-1.32)    | 1.17 (1.02-1.34)    |               |               | 1.22 (0.98-1.51)            | 1.15 (0.98-1.35)           |               | 1.22 (0.82-1.81)    |
| p-trend                                                                          |        |                                      | 0.014               | 0.048               | 0.054               |               |               | 0.303                       | 0.059                      |               | 0.08                |
| <b>Mean BP (mmHg) (1/3SBP+2/3DBP) Cohort-specific quartiles</b>                  |        |                                      |                     |                     |                     |               |               |                             |                            |               |                     |
| 50.0-88.3                                                                        | 850    | 76991                                | 1 (referent)        | 1 (referent)        | 1 (referent)        |               |               | 1 (referent)                | 1 (referent)               |               | 1 (referent)        |
| 88.5-96.6                                                                        | 1141   | 77727                                | 1.13 (1.03-1.23)    | 1.10 (1.01-1.21)    | 1.11 (1.01-1.22)    |               |               | 1.13 (1.01-1.27)            | 1.08 (0.94-1.25)           |               | 1.19 (0.96-1.48)    |
| 96.8-105.5                                                                       | 1335   | 76327                                | 1.17 (1.07-1.27)    | 1.13 (1.04-1.24)    | 1.13 (1.03-1.25)    |               |               | 1.11 (0.99-1.25)            | 1.16 (1.01-1.33)           | 0.957         | 1.15 (0.92-1.45)    |
| 105.6-216.6                                                                      | 1460   | 76273                                | 1.19 (1.09-1.30)    | 1.16 (1.06-1.27)    | 1.16 (1.05-1.28)    |               |               | 1.20 (1.06-1.36)            | 1.15 (1.00-1.31)           |               | 1.41 (1.11-1.80)    |
| p-trend                                                                          |        |                                      | 0.0001              | 0.002               | 0.005               |               |               | 0.01                        | 0.038                      |               | 0.01                |
| <b>Hypertension (SBP &gt;= 140 mmHg, or DBP &gt;= 90 mmHg, or self-reported)</b> |        |                                      |                     |                     |                     |               |               |                             |                            |               |                     |
| Normotensive                                                                     | 2269   | 49921                                | 1 (referent)        | 1 (referent)        | 1 (referent)        |               |               | 1 (referent)                | 1 (referent)               |               | 1 (referent)        |
| Hypertensive                                                                     | 2517   | 53245                                | 1.08 (1.02-1.15)    | 1.06 (1.00-1.13)    | 1.07 (1.00-1.14)    |               |               | 1.07 (0.98-1.16)            | 1.08 (0.99-1.17)           | 0.623         | 1.26 (1.06-1.48)    |





| Ovary                                                                | Cases | Cohort | Excluding first 2 years of follow-up |                     |                     | Men           | Women         | Sex                 | BMI <= 25 mg/m <sup>2</sup> | BMI > 25 mg/m <sup>2</sup> | BMI           | Age <= 53 yrs       |
|----------------------------------------------------------------------|-------|--------|--------------------------------------|---------------------|---------------------|---------------|---------------|---------------------|-----------------------------|----------------------------|---------------|---------------------|
|                                                                      |       |        | HR (crude)                           | HR (adjusted)       | HR (adjusted)       | HR (adjusted) | HR (adjusted) | p-interaction       | HR (adjusted)               | HR (adjusted)              | p-interaction | HR (adjusted)       |
| Cases                                                                |       |        | 1007                                 | 1007                | 893                 |               |               |                     |                             |                            |               | 355                 |
| Cohort size                                                          |       |        | 194727                               | 194727              | 191551              |               |               |                     | 104416                      | 90311                      |               | 99069               |
| Mean Systolic Blood Pressure continuous (per 10mmHg increase)        | 1007  | 194727 | 0.995 (0.962-1.029)                  | 0.990 (0.956-1.025) | 0.990 (0.954-1.027) |               |               | 0.990 (0.942-1.042) | 0.998 (0.951-1.047)         | 0.881                      |               | 1.024 (0.958-1.094) |
| Mean Diastolic Blood Pressure continuous (per 10mmHg increase)       | 1007  | 194727 | 0.998 (0.939-1.061)                  | 0.997 (0.936-1.062) | 0.988 (0.923-1.056) |               |               | 1.057 (0.967-1.156) | 0.955 (0.874-1.043)         | 0.086                      |               | 1.087 (0.975-1.211) |
| Mean Blood Pressure (1/3SBP+2/3DBP) continuous (per 10mmHg increase) | 1007  | 194727 | 0.995 (0.945-1.048)                  | 0.991 (0.939-1.046) | 0.986 (0.931-1.044) |               |               | 1.020 (0.945-1.100) | 0.977 (0.906-1.052)         | 0.385                      |               | 1.061 (0.965-1.167) |
| Systolic Blood Pressure (mmHg) ESH classification                    |       |        |                                      |                     |                     |               |               |                     |                             |                            |               |                     |
| < 120                                                                | 262   | 65461  | 1 (referent)                         | 1 (referent)        | 1 (referent)        |               |               | 1 (referent)        | 1 (referent)                |                            |               | 1 (referent)        |
| 120-129                                                              | 202   | 40944  | 1.00 (0.83-1.20)                     | 1.00 (0.83-1.20)    | 0.99 (0.81-1.21)    |               |               | 1.08 (0.84-1.37)    | 0.90 (0.67-1.21)            |                            |               | 1.06 (0.81-1.40)    |
| 130-139                                                              | 206   | 33415  | 1.12 (0.93-1.36)                     | 1.11 (0.92-1.35)    | 1.08 (0.88-1.32)    |               |               | 1.25 (0.97-1.62)    | 0.98 (0.73-1.30)            |                            |               | 1.03 (0.75-1.41)    |
| 140-159                                                              | 233   | 38168  | 0.97 (0.80-1.17)                     | 0.95 (0.78-1.15)    | 0.95 (0.77-1.17)    |               |               | 1.05 (0.81-1.38)    | 0.86 (0.65-1.15)            | 0.911                      |               | 1.01 (0.72-1.43)    |
| 160-179                                                              | 77    | 13066  | 0.88 (0.68-1.16)                     | 0.87 (0.66-1.14)    | 0.89 (0.67-1.19)    |               |               | 0.78 (0.49-1.23)    | 0.90 (0.63-1.28)            |                            |               | 1.24 (0.70-2.19)    |
| >= 180                                                               | 27    | 3673   | 1.10 (0.73-1.66)                     | 1.06 (0.70-1.60)    | 1.02 (0.65-1.59)    |               |               | 0.75 (0.33-1.73)    | 1.18 (0.72-1.93)            |                            |               | 1.99 (0.80-4.94)    |
| p-trend                                                              |       |        | 0.713                                | 0.538               | 0.593               |               |               | 0.81                | 0.774                       |                            |               | 0.449               |
| Diastolic Blood Pressure (mmHg) ESH classification                   |       |        |                                      |                     |                     |               |               |                     |                             |                            |               |                     |
| < 80                                                                 | 441   | 96352  | 1 (referent)                         | 1 (referent)        | 1 (referent)        |               |               | 1 (referent)        | 1 (referent)                |                            |               | 1 (referent)        |
| 80-84                                                                | 228   | 39059  | 1.11 (0.94-1.31)                     | 1.11 (0.94-1.31)    | 1.13 (0.95-1.34)    |               |               | 1.14 (0.91-1.44)    | 1.08 (0.85-1.36)            |                            |               | 1.36 (1.04-1.77)    |
| 85-89                                                                | 143   | 23956  | 1.09 (0.90-1.32)                     | 1.09 (0.90-1.33)    | 1.08 (0.88-1.33)    |               |               | 1.10 (0.82-1.47)    | 1.07 (0.83-1.40)            |                            |               | 1.11 (0.78-1.59)    |
| 90-99                                                                | 154   | 27199  | 1.00 (0.83-1.21)                     | 1.00 (0.83-1.21)    | 0.99 (0.80-1.21)    |               |               | 1.40 (1.07-1.83)    | 0.79 (0.60-1.03)            | 0.013                      |               | 1.26 (0.89-1.77)    |
| 100-109                                                              | 32    | 6720   | 0.82 (0.57-1.18)                     | 0.82 (0.57-1.18)    | 0.81 (0.55-1.20)    |               |               | 0.58 (0.27-1.23)    | 0.91 (0.60-1.40)            |                            |               | 0.86 (0.40-1.85)    |
| >= 110                                                               | 9     | 1441   | 1.12 (0.58-2.17)                     | 1.10 (0.56-2.13)    | 0.96 (0.45-2.04)    |               |               | 2.52 (1.03-6.16)    | 0.62 (0.23-1.68)            |                            |               | 2.54 (0.93-6.94)    |
| p-trend                                                              |       |        | 0.803                                | 0.79                | 0.625               |               |               | 0.084               | 0.108                       |                            |               | 0.187               |
| Systolic Blood Pressure (mmHg) ASH classification                    |       |        |                                      |                     |                     |               |               |                     |                             |                            |               |                     |
| < 120                                                                | 262   | 65461  | 1 (referent)                         | 1 (referent)        | 1 (referent)        |               |               | 1 (referent)        | 1 (referent)                |                            |               | 1 (referent)        |
| 120-139                                                              | 408   | 74359  | 1.06 (0.90-1.24)                     | 1.05 (0.89-1.23)    | 1.03 (0.87-1.22)    |               |               | 1.15 (0.93-1.42)    | 0.94 (0.73-1.21)            |                            |               | 1.05 (0.82-1.34)    |
| 140-159                                                              | 233   | 38168  | 0.96 (0.80-1.16)                     | 0.94 (0.78-1.15)    | 0.95 (0.77-1.16)    |               |               | 1.05 (0.80-1.37)    | 0.86 (0.65-1.14)            | 0.975                      |               | 1.01 (0.72-1.43)    |
| >= 160                                                               | 104   | 16739  | 0.93 (0.73-1.18)                     | 0.90 (0.70-1.16)    | 0.92 (0.70-1.19)    |               |               | 0.77 (0.51-1.17)    | 0.96 (0.69-1.33)            |                            |               | 1.38 (0.83-2.28)    |
| p-trend                                                              |       |        | 0.422                                | 0.299               | 0.4                 |               |               | 0.556               | 0.594                       |                            |               | 0.416               |
| Diastolic Blood Pressure (mmHg) ASH classification                   |       |        |                                      |                     |                     |               |               |                     |                             |                            |               |                     |
| < 80                                                                 | 441   | 96352  | 1 (referent)                         | 1 (referent)        | 1 (referent)        |               |               | 1 (referent)        | 1 (referent)                |                            |               | 1 (referent)        |
| 80-89                                                                | 371   | 63015  | 1.10 (0.96-1.27)                     | 1.11 (0.96-1.27)    | 1.11 (0.95-1.29)    |               |               | 1.13 (0.92-1.38)    | 1.07 (0.88-1.32)            |                            |               | 1.27 (1.00-1.61)    |
| 90-99                                                                | 154   | 27199  | 1.00 (0.83-1.21)                     | 1.00 (0.83-1.21)    | 0.99 (0.80-1.21)    |               |               | 1.40 (1.07-1.83)    | 0.79 (0.60-1.03)            | 0.019                      |               | 1.26 (0.89-1.78)    |
| >= 100                                                               | 41    | 8161   | 0.87 (0.63-1.21)                     | 0.87 (0.63-1.21)    | 0.84 (0.59-1.20)    |               |               | 0.85 (0.47-1.53)    | 0.86 (0.58-1.28)            |                            |               | 1.14 (0.61-2.12)    |
| p-trend                                                              |       |        | 0.798                                | 0.79                | 0.676               |               |               | 0.105               | 0.125                       |                            |               | 0.12                |
| Mean BP (mmHg) (1/3SBP+2/3DBP) Cohort-specific quartiles             |       |        |                                      |                     |                     |               |               |                     |                             |                            |               |                     |
| 50.0-88.3                                                            | 240   | 59270  | 1 (referent)                         | 1 (referent)        | 1 (referent)        |               |               | 1 (referent)        | 1 (referent)                |                            |               | 1 (referent)        |
| 88.5-96.6                                                            | 258   | 49321  | 1.07 (0.90-1.28)                     | 1.07 (0.90-1.28)    | 1.03 (0.85-1.25)    |               |               | 1.28 (1.02-1.61)    | 0.82 (0.61-1.09)            |                            |               | 1.19 (0.91-1.56)    |
| 96.8-105.5                                                           | 259   | 44981  | 1.07 (0.89-1.28)                     | 1.06 (0.88-1.28)    | 1.05 (0.86-1.27)    |               |               | 1.05 (0.81-1.36)    | 1.01 (0.77-1.32)            | 0.3                        |               | 1.20 (0.89-1.62)    |
| 105.6-216.6                                                          | 250   | 41155  | 1.01 (0.84-1.22)                     | 1.00 (0.82-1.21)    | 0.99 (0.80-1.21)    |               |               | 1.19 (0.90-1.56)    | 0.85 (0.64-1.12)            |                            |               | 1.11 (0.78-1.59)    |
| p-trend                                                              |       |        | 0.951                                | 0.94                | 0.911               |               |               | 0.423               | 0.555                       |                            |               | 0.398               |
| Hypertension (SBP >= 140 mmHg, or DBP >= 90 mmHg, or self-reported)  |       |        |                                      |                     |                     |               |               |                     |                             |                            |               |                     |
| Normotensive                                                         | 554   | 117264 | 1 (referent)                         | 1 (referent)        | 1 (referent)        |               |               | 1 (referent)        | 1 (referent)                |                            |               | 1 (referent)        |
| Hypertensive                                                         | 453   | 77463  | 0.98 (0.86-1.12)                     | 0.97 (0.85-1.11)    | 1.00 (0.87-1.15)    |               |               | 1.06 (0.87-1.28)    | 0.93 (0.77-1.12)            | 0.335                      |               | 1.27 (1.00-1.60)    |

| Age > 53 yrs                                                                                                              | Age           | Never smokers                                                                                                             | Ever smokers                                                                                                              | Smoking       | Alcohol <= 12g                                                                                                            | Alcohol > 12g                                                                                                             | Alcohol       | No antihypertensive treatment                                                                                             | Antihypertensive treatment                                                                                                | Treatment     | Ovary                                                                                                                         |
|---------------------------------------------------------------------------------------------------------------------------|---------------|---------------------------------------------------------------------------------------------------------------------------|---------------------------------------------------------------------------------------------------------------------------|---------------|---------------------------------------------------------------------------------------------------------------------------|---------------------------------------------------------------------------------------------------------------------------|---------------|---------------------------------------------------------------------------------------------------------------------------|---------------------------------------------------------------------------------------------------------------------------|---------------|-------------------------------------------------------------------------------------------------------------------------------|
| HR (adjusted)                                                                                                             | p-interaction | HR (adjusted)                                                                                                             | HR (adjusted)                                                                                                             | p-interaction | HR (adjusted)                                                                                                             | HR (adjusted)                                                                                                             | p-interaction | HR (adjusted)                                                                                                             | HR (adjusted)                                                                                                             | p-interaction |                                                                                                                               |
| 652<br>95658                                                                                                              |               | 512<br>106077                                                                                                             | 477<br>85755                                                                                                              |               | 777<br>149170                                                                                                             | 230<br>45557                                                                                                              |               | 703<br>147109                                                                                                             | 112<br>23736                                                                                                              |               | Cases<br>Cohort size                                                                                                          |
| 0.976 (0.937-1.018)                                                                                                       | 0.237         | 1.001 (0.953-1.051)                                                                                                       | 0.983 (0.934-1.035)                                                                                                       | 0.858         | 0.988 (0.949-1.028)                                                                                                       | 1.006 (0.934-1.083)                                                                                                       | 0.956         | 0.999 (0.955-1.045)                                                                                                       | 1.008 (0.914-1.113)                                                                                                       | 0.944         | Mean Systolic Blood Pressure<br>continuous (per 10mmHg increase)                                                              |
| 0.954 (0.883-1.032)                                                                                                       | 0.085         | 1.019 (0.933-1.114)                                                                                                       | 0.992 (0.905-1.087)                                                                                                       | 0.96          | 1.004 (0.934-1.078)                                                                                                       | 0.991 (0.866-1.133)                                                                                                       | 0.986         | 1.003 (0.925-1.087)                                                                                                       | 1.058 (0.874-1.281)                                                                                                       | 0.528         | Mean Diastolic Blood Pressure<br>continuous (per 10mmHg increase)                                                             |
| 0.959 (0.899-1.024)                                                                                                       | 0.112         | 1.010 (0.937-1.089)                                                                                                       | 0.983 (0.909-1.063)                                                                                                       | 0.947         | 0.992 (0.933-1.055)                                                                                                       | 1.000 (0.893-1.120)                                                                                                       | 0.984         | 1.000 (0.934-1.072)                                                                                                       | 1.035 (0.880-1.217)                                                                                                       | 0.693         | Mean Blood Pressure (1/3SBP+2/3DBP)<br>continuous (per 10mmHg increase)                                                       |
| 1 (referent)<br>0.94 (0.72-1.21)<br>1.11 (0.87-1.43)<br>0.90 (0.70-1.15)<br>0.78 (0.57-1.08)<br>0.92 (0.57-1.47)<br>0.194 | 0.188         | 1 (referent)<br>0.88 (0.67-1.16)<br>1.13 (0.87-1.48)<br>1.00 (0.77-1.31)<br>0.85 (0.58-1.25)<br>0.93 (0.51-1.69)<br>0.883 | 1 (referent)<br>1.10 (0.85-1.43)<br>1.06 (0.80-1.41)<br>0.90 (0.67-1.20)<br>0.90 (0.61-1.35)<br>1.19 (0.67-2.12)<br>0.54  | 0.953         | 1 (referent)<br>0.96 (0.78-1.19)<br>1.10 (0.89-1.37)<br>0.90 (0.72-1.12)<br>0.84 (0.61-1.14)<br>1.14 (0.73-1.79)<br>0.467 | 1 (referent)<br>1.16 (0.78-1.72)<br>1.18 (0.78-1.78)<br>1.18 (0.79-1.77)<br>1.05 (0.59-1.88)<br>0.81 (0.29-2.30)<br>0.796 | 0.864         | 1 (referent)<br>1.01 (0.82-1.25)<br>1.11 (0.89-1.39)<br>1.03 (0.82-1.30)<br>0.82 (0.56-1.20)<br>1.10 (0.59-2.06)<br>0.925 | 1 (referent)<br>2.04 (0.66-6.24)<br>1.63 (0.54-4.95)<br>1.51 (0.51-4.45)<br>1.98 (0.65-6.00)<br>1.67 (0.48-5.78)<br>0.665 | 0.831         | ESH classification<br>< 120<br>120-129<br>130-139<br>140-159<br>160-179<br>>= 180<br>p-trend                                  |
| 1 (referent)<br>0.98 (0.80-1.21)<br>1.06 (0.84-1.34)<br>0.90 (0.71-1.13)<br>0.78 (0.52-1.19)<br>0.74 (0.30-1.79)<br>0.237 | 0.125         | 1 (referent)<br>1.02 (0.80-1.29)<br>1.21 (0.93-1.56)<br>0.95 (0.72-1.24)<br>0.95 (0.59-1.52)<br>1.59 (0.74-3.40)<br>0.741 | 1 (referent)<br>1.26 (1.00-1.59)<br>1.03 (0.76-1.38)<br>1.09 (0.83-1.44)<br>0.70 (0.39-1.26)<br>0.57 (0.14-2.31)<br>0.672 | 0.983         | 1 (referent)<br>1.09 (0.91-1.32)<br>1.17 (0.94-1.45)<br>0.96 (0.77-1.20)<br>0.87 (0.58-1.30)<br>1.10 (0.52-2.34)<br>0.867 | 1 (referent)<br>1.23 (0.88-1.73)<br>0.87 (0.56-1.36)<br>1.18 (0.80-1.72)<br>0.70 (0.30-1.62)<br>1.04 (0.25-4.29)<br>0.949 | 0.78          | 1 (referent)<br>1.06 (0.87-1.28)<br>1.06 (0.83-1.34)<br>0.95 (0.74-1.22)<br>0.69 (0.38-1.23)<br>1.04 (0.33-3.27)<br>0.533 | 1 (referent)<br>1.67 (0.84-3.31)<br>1.91 (0.96-3.80)<br>1.41 (0.73-2.73)<br>1.55 (0.69-3.49)<br>2.03 (0.64-6.42)<br>0.43  | 0.306         | Diastolic Blood Pressure (mmHg)<br>ESH classification<br>< 80<br>80-84<br>85-89<br>90-99<br>100-109<br>>= 110<br>p-trend      |
| 1 (referent)<br>1.03 (0.82-1.28)<br>0.89 (0.70-1.14)<br>0.81 (0.60-1.09)<br>0.07                                          | 0.106         | 1 (referent)<br>1.00 (0.79-1.26)<br>0.99 (0.76-1.30)<br>0.86 (0.60-1.22)<br>0.493                                         | 1 (referent)<br>1.08 (0.86-1.37)<br>0.90 (0.68-1.20)<br>0.97 (0.68-1.39)<br>0.521                                         | 0.724         | 1 (referent)<br>1.03 (0.85-1.23)<br>0.89 (0.71-1.11)<br>0.89 (0.68-1.18)<br>0.23                                          | 1 (referent)<br>1.17 (0.83-1.65)<br>1.18 (0.79-1.77)<br>0.99 (0.58-1.72)<br>0.8                                           | 0.709         | 1 (referent)<br>1.05 (0.88-1.27)<br>1.02 (0.81-1.29)<br>0.87 (0.62-1.23)<br>0.67                                          | 1 (referent)<br>1.80 (0.62-5.23)<br>1.53 (0.52-4.50)<br>1.91 (0.64-5.73)<br>0.483                                         | 0.56          | Systolic Blood Pressure (mmHg)<br>ASH classification<br>< 120<br>120-139<br>140-159<br>>= 160<br>p-trend                      |
| 1 (referent)<br>1.01 (0.85-1.21)<br>0.90 (0.71-1.13)<br>0.77 (0.53-1.14)<br>0.176                                         | 0.071         | 1 (referent)<br>1.09 (0.89-1.33)<br>0.95 (0.72-1.24)<br>1.06 (0.70-1.60)<br>0.986                                         | 1 (referent)<br>1.17 (0.95-1.44)<br>1.09 (0.83-1.44)<br>0.68 (0.39-1.17)<br>0.903                                         | 0.695         | 1 (referent)<br>1.12 (0.95-1.32)<br>0.96 (0.77-1.20)<br>0.91 (0.63-1.31)<br>0.763                                         | 1 (referent)<br>1.09 (0.80-1.48)<br>1.18 (0.80-1.73)<br>0.77 (0.37-1.60)<br>0.824                                         | 0.575         | 1 (referent)<br>1.06 (0.89-1.25)<br>0.95 (0.74-1.22)<br>0.74 (0.44-1.25)<br>0.515                                         | 1 (referent)<br>1.78 (0.95-3.33)<br>1.41 (0.73-2.73)<br>1.65 (0.77-3.52)<br>0.511                                         | 0.343         | Diastolic Blood Pressure (mmHg)<br>ASH classification<br>< 80<br>80-89<br>90-99<br>>= 100<br>p-trend                          |
| 1 (referent)<br>0.98 (0.77-1.24)<br>0.96 (0.76-1.22)<br>0.92 (0.72-1.17)<br>0.46                                          | 0.293         | 1 (referent)<br>1.06 (0.82-1.38)<br>1.02 (0.78-1.34)<br>1.07 (0.81-1.40)<br>0.734                                         | 1 (referent)<br>1.11 (0.86-1.44)<br>1.15 (0.88-1.50)<br>0.96 (0.72-1.29)<br>0.878                                         | 0.946         | 1 (referent)<br>1.12 (0.91-1.37)<br>1.08 (0.87-1.33)<br>0.98 (0.78-1.22)<br>0.721                                         | 1 (referent)<br>0.96 (0.65-1.42)<br>1.06 (0.72-1.57)<br>1.13 (0.75-1.70)<br>0.469                                         | 0.551         | 1 (referent)<br>1.15 (0.94-1.41)<br>1.14 (0.92-1.42)<br>1.06 (0.83-1.35)<br>0.585                                         | two cases in referent<br>-<br>-<br>-<br>-                                                                                 | -             | Mean BP (mmHg) (1/3SBP+2/3DBP)<br>Cohort-specific quartiles<br>50.0-88.3<br>88.5-96.6<br>96.8-105.5<br>105.6-216.6<br>p-trend |
| 1 (referent)<br>0.86 (0.73-1.01)                                                                                          | 0.01          | 1 (referent)<br>0.96 (0.80-1.17)                                                                                          | 1 (referent)<br>1.01 (0.83-1.23)                                                                                          | 0.492         | 1 (referent)<br>0.93 (0.80-1.09)                                                                                          | 1 (referent)<br>1.15 (0.87-1.53)                                                                                          | 0.327         | -<br>1 (referent)                                                                                                         | -<br>0.87 (0.69-1.11)                                                                                                     | -             | Hypertension (SBP >= 140 mmHg,<br>or DBP >= 90 mmHg, or self-reported)<br>Normotensive<br>Hypertensive                        |

| Corpus Uteri                                                                     |        | Excluding first 2 years of follow-up |                     |                     | Men                 | Women         | Sex           | BMI <= 25 mg/m <sup>2</sup> | BMI > 25 mg/m <sup>2</sup> | BMI           | Age <= 53 yrs       |
|----------------------------------------------------------------------------------|--------|--------------------------------------|---------------------|---------------------|---------------------|---------------|---------------|-----------------------------|----------------------------|---------------|---------------------|
| Cases                                                                            | Cohort | HR (crude)                           | HR (adjusted)       | HR (adjusted)       | HR (adjusted)       | HR (adjusted) | p-interaction | HR (adjusted)               | HR (adjusted)              | p-interaction | HR (adjusted)       |
| Cases                                                                            |        | 1164                                 | 1164                | 1042                |                     |               |               | 462                         | 702                        |               | 387                 |
| Cohort size                                                                      |        | 194727                               | 194727              | 191551              |                     |               |               | 104416                      | 90311                      |               | 99069               |
| <b>Mean Systolic Blood Pressure continuous (per 10mmHg increase)</b>             | 1164   | 194727                               | 1.087 (1.055-1.120) | 1.037 (1.005-1.070) | 1.039 (1.005-1.074) |               |               | 0.985 (0.934-1.039)         | 1.097 (1.056-1.140)        | 0.004         | 1.024 (0.963-1.088) |
| <b>Mean Diastolic Blood Pressure continuous (per 10mmHg increase)</b>            | 1164   | 194727                               | 1.149 (1.087-1.214) | 1.061 (1.002-1.125) | 1.068 (1.005-1.136) |               |               | 1.003 (0.912-1.104)         | 1.153 (1.074-1.238)        | 0.032         | 1.039 (0.937-1.152) |
| <b>Mean Blood Pressure (1/3SBP+2/3DBP) continuous (per 10mmHg increase)</b>      | 1164   | 194727                               | 1.140 (1.089-1.194) | 1.059 (1.009-1.112) | 1.064 (1.010-1.121) |               |               | 0.990 (0.913-1.074)         | 1.153 (1.086-1.224)        | 0.006         | 1.037 (0.948-1.134) |
| <b>Systolic Blood Pressure (mmHg) ESH classification</b>                         |        |                                      |                     |                     |                     |               |               |                             |                            |               |                     |
| < 120                                                                            | 240    | 65461                                | 1 (referent)        | 1 (referent)        | 1 (referent)        |               |               | 1 (referent)                | 1 (referent)               |               | 1 (referent)        |
| 120-129                                                                          | 207    | 40944                                | 1.08 (0.89-1.30)    | 0.98 (0.81-1.18)    | 0.97 (0.79-1.18)    |               |               | 1.01 (0.78-1.31)            | 1.05 (0.79-1.39)           |               | 0.99 (0.75-1.30)    |
| 130-139                                                                          | 223    | 33415                                | 1.28 (1.06-1.54)    | 1.08 (0.89-1.31)    | 1.06 (0.87-1.30)    |               |               | 1.09 (0.83-1.44)            | 1.25 (0.95-1.63)           |               | 1.05 (0.78-1.42)    |
| 140-159                                                                          | 323    | 38168                                | 1.46 (1.22-1.75)    | 1.16 (0.97-1.40)    | 1.17 (0.97-1.42)    |               |               | 1.01 (0.76-1.33)            | 1.49 (1.16-1.92)           | 0.012         | 1.22 (0.90-1.65)    |
| 160-179                                                                          | 128    | 13066                                | 1.64 (1.31-2.06)    | 1.25 (0.99-1.58)    | 1.23 (0.96-1.58)    |               |               | 1.01 (0.67-1.55)            | 1.68 (1.24-2.27)           |               | 1.06 (0.63-1.79)    |
| >= 180                                                                           | 43     | 3673                                 | 1.97 (1.41-2.75)    | 1.42 (1.01-1.99)    | 1.43 (1.00-2.04)    |               |               | 1.02 (0.49-2.14)            | 2.01 (1.34-3.01)           |               | 1.69 (0.73-3.91)    |
| p-trend                                                                          |        |                                      | 0.00000004          | 0.006               | 0.008               |               |               | 0.858                       | 0.000001                   |               | 0.183               |
| <b>Diastolic Blood Pressure (mmHg) ESH classification</b>                        |        |                                      |                     |                     |                     |               |               |                             |                            |               |                     |
| < 80                                                                             | 451    | 96352                                | 1 (referent)        | 1 (referent)        | 1 (referent)        |               |               | 1 (referent)                | 1 (referent)               |               | 1 (referent)        |
| 80-84                                                                            | 230    | 39059                                | 1.06 (0.91-1.25)    | 0.97 (0.82-1.14)    | 0.95 (0.80-1.13)    |               |               | 1.07 (0.84-1.36)            | 0.96 (0.77-1.20)           |               | 1.21 (0.93-1.56)    |
| 85-89                                                                            | 166    | 23956                                | 1.17 (0.98-1.40)    | 1.02 (0.85-1.22)    | 1.01 (0.83-1.22)    |               |               | 0.83 (0.60-1.15)            | 1.22 (0.97-1.52)           |               | 0.82 (0.57-1.17)    |
| 90-99                                                                            | 236    | 27199                                | 1.43 (1.21-1.68)    | 1.18 (1.00-1.40)    | 1.19 (0.99-1.41)    |               |               | 1.18 (0.89-1.57)            | 1.34 (1.09-1.65)           | 0.052         | 1.06 (0.78-1.46)    |
| 100-109                                                                          | 71     | 6720                                 | 1.72 (1.34-2.22)    | 1.39 (1.07-1.80)    | 1.42 (1.08-1.86)    |               |               | 1.08 (0.61-1.90)            | 1.75 (1.30-2.36)           |               | 1.51 (0.93-2.46)    |
| >= 110                                                                           | 10     | 1441                                 | 1.19 (0.63-2.23)    | 0.88 (0.47-1.66)    | 1.01 (0.53-1.89)    |               |               | no cases                    | 1.27 (0.67-2.41)           |               | 1.09 (0.34-3.44)    |
| p-trend                                                                          |        |                                      | 0.0000003           | 0.016               | 0.013               |               |               | 0.807                       | 0.00003                    |               | 0.537               |
| <b>Systolic Blood Pressure (mmHg) ASH classification</b>                         |        |                                      |                     |                     |                     |               |               |                             |                            |               |                     |
| < 120                                                                            | 240    | 65461                                | 1 (referent)        | 1 (referent)        | 1 (referent)        |               |               | 1 (referent)                | 1 (referent)               |               | 1 (referent)        |
| 120-139                                                                          | 430    | 74359                                | 1.17 (1.00-1.38)    | 1.03 (0.87-1.21)    | 1.01 (0.85-1.20)    |               |               | 1.04 (0.83-1.31)            | 1.15 (0.90-1.46)           |               | 1.01 (0.80-1.29)    |
| 140-159                                                                          | 323    | 38168                                | 1.46 (1.22-1.74)    | 1.16 (0.97-1.39)    | 1.17 (0.96-1.41)    |               |               | 1.01 (0.76-1.33)            | 1.48 (1.15-1.91)           | 0.016         | 1.21 (0.89-1.64)    |
| >= 160                                                                           | 171    | 16739                                | 1.70 (1.38-2.10)    | 1.28 (1.03-1.59)    | 1.27 (1.01-1.60)    |               |               | 1.01 (0.69-1.50)            | 1.74 (1.31-2.31)           |               | 1.17 (0.73-1.86)    |
| p-trend                                                                          |        |                                      | 0.00000003          | 0.011               | 0.015               |               |               | 0.957                       | 0.000005                   |               | 0.243               |
| <b>Diastolic Blood Pressure (mmHg) ASH classification</b>                        |        |                                      |                     |                     |                     |               |               |                             |                            |               |                     |
| < 80                                                                             | 451    | 96352                                | 1 (referent)        | 1 (referent)        | 1 (referent)        |               |               | 1 (referent)                | 1 (referent)               |               | 1 (referent)        |
| 80-89                                                                            | 396    | 63015                                | 1.11 (0.96-1.27)    | 0.99 (0.86-1.14)    | 0.98 (0.84-1.13)    |               |               | 0.98 (0.79-1.21)            | 1.07 (0.89-1.29)           |               | 1.06 (0.84-1.34)    |
| 90-99                                                                            | 236    | 27199                                | 1.42 (1.21-1.68)    | 1.18 (1.00-1.40)    | 1.19 (0.99-1.41)    |               |               | 1.18 (0.89-1.57)            | 1.34 (1.09-1.65)           | 0.12          | 1.07 (0.78-1.47)    |
| >= 100                                                                           | 81     | 8161                                 | 1.63 (1.28-2.08)    | 1.30 (1.02-1.66)    | 1.34 (1.04-1.74)    |               |               | 0.94 (0.53-1.65)            | 1.66 (1.26-2.19)           |               | 1.45 (0.91-2.29)    |
| p-trend                                                                          |        |                                      | 0.0000003           | 0.014               | 0.012               |               |               | 0.556                       | 0.00007                    |               | 0.22                |
| <b>Mean BP (mmHg) (1/3SBP+2/3DBP) Cohort-specific quartiles</b>                  |        |                                      |                     |                     |                     |               |               |                             |                            |               |                     |
| 50.0-88.3                                                                        | 229    | 59270                                | 1 (referent)        | 1 (referent)        | 1 (referent)        |               |               | 1 (referent)                | 1 (referent)               |               | 1 (referent)        |
| 88.5-96.6                                                                        | 252    | 49321                                | 1.05 (0.88-1.26)    | 0.99 (0.79-1.14)    | 0.99 (0.82-1.20)    |               |               | 0.95 (0.74-1.21)            | 1.05 (0.80-1.37)           |               | 1.07 (0.81-1.41)    |
| 96.8-105.5                                                                       | 306    | 44981                                | 1.24 (1.04-1.48)    | 1.03 (0.86-1.24)    | 1.06 (0.87-1.28)    |               |               | 1.07 (0.83-1.39)            | 1.17 (0.90-1.51)           | 0.02          | 1.15 (0.86-1.54)    |
| 105.6-216.6                                                                      | 377    | 41155                                | 1.52 (1.28-1.81)    | 1.17 (0.98-1.40)    | 1.20 (0.99-1.45)    |               |               | 0.98 (0.73-1.30)            | 1.53 (1.19-1.97)           |               | 1.19 (0.87-1.64)    |
| p-trend                                                                          |        |                                      | 0.0000002           | 0.037               | 0.034               |               |               | 0.863                       | 0.00004                    |               | 0.237               |
| <b>Hypertension (SBP &gt;= 140 mmHg, or DBP &gt;= 90 mmHg, or self-reported)</b> |        |                                      |                     |                     |                     |               |               |                             |                            |               |                     |
| Normotensive                                                                     | 540    | 117264                               | 1 (referent)        | 1 (referent)        | 1 (referent)        |               |               | 1 (referent)                | 1 (referent)               |               | 1 (referent)        |
| Hypertensive                                                                     | 624    | 77463                                | 1.37 (1.22-1.55)    | 1.16 (1.02-1.32)    | 1.16 (1.02-1.33)    |               |               | 0.96 (0.78-1.17)            | 1.46 (1.24-1.72)           | 0.002         | 1.14 (0.91-1.42)    |

| Age > 53 yrs                                                                                                              | Age           | Never smokers                                                                                                             | Ever smokers                                                                                                              | Smoking       | Alcohol <= 12g                                                                                                            | Alcohol > 12g                                                                                                             | Alcohol       | No antihypertensive treatment                                                                                             | Antihypertensive treatment                                                                                                | Treatment     | Corpus Uteri                                                                                                                  |
|---------------------------------------------------------------------------------------------------------------------------|---------------|---------------------------------------------------------------------------------------------------------------------------|---------------------------------------------------------------------------------------------------------------------------|---------------|---------------------------------------------------------------------------------------------------------------------------|---------------------------------------------------------------------------------------------------------------------------|---------------|---------------------------------------------------------------------------------------------------------------------------|---------------------------------------------------------------------------------------------------------------------------|---------------|-------------------------------------------------------------------------------------------------------------------------------|
| HR (adjusted)                                                                                                             | p-interaction | HR (adjusted)                                                                                                             | HR (adjusted)                                                                                                             | p-interaction | HR (adjusted)                                                                                                             | HR (adjusted)                                                                                                             | p-interaction | HR (adjusted)                                                                                                             | HR (adjusted)                                                                                                             | p-interaction |                                                                                                                               |
| 777<br>95658                                                                                                              |               | 706<br>106077                                                                                                             | 446<br>85755                                                                                                              |               | 898<br>149170                                                                                                             | 266<br>45557                                                                                                              |               | 758<br>147109                                                                                                             | 219<br>23736                                                                                                              |               | Cases<br>Cohort size                                                                                                          |
| 1.043 (1.005-1.082)                                                                                                       | 0.503         | 1.068 (1.026-1.111)                                                                                                       | 0.984 (0.934-1.037)                                                                                                       | 0.001         | 1.027 (0.991-1.065)                                                                                                       | 1.071 (1.005-1.142)                                                                                                       | 0.608         | 1.012 (0.970-1.056)                                                                                                       | 1.039 (0.969-1.115)                                                                                                       | 0.507         | Mean Systolic Blood Pressure continuous (per 10mmHg increase)                                                                 |
| 1.075 (1.002-1.153)                                                                                                       | 0.44          | 1.095 (1.017-1.179)                                                                                                       | 0.996 (0.907-1.095)                                                                                                       | 0.036         | 1.040 (0.973-1.111)                                                                                                       | 1.142 (1.013-1.287)                                                                                                       | 0.58          | 1.016 (0.941-1.097)                                                                                                       | 1.057 (0.921-1.213)                                                                                                       | 0.543         | Mean Diastolic Blood Pressure continuous (per 10mmHg increase)                                                                |
| 1.071 (1.010-1.136)                                                                                                       | 0.417         | 1.101 (1.035-1.172)                                                                                                       | 0.986 (0.910-1.068)                                                                                                       | 0.004         | 1.041 (0.984-1.101)                                                                                                       | 1.125 (1.018-1.243)                                                                                                       | 0.568         | 1.018 (0.953-1.087)                                                                                                       | 1.063 (0.947-1.194)                                                                                                       | 0.462         | Mean Blood Pressure (1/3SBP+2/3DBP) continuous (per 10mmHg increase)                                                          |
| 1 (referent)<br>0.99 (0.77-1.29)<br>1.11 (0.87-1.43)<br>1.16 (0.92-1.48)<br>1.30 (0.98-1.72)<br>1.41 (0.96-2.08)<br>0.013 | 0.646         | 1 (referent)<br>1.17 (0.90-1.50)<br>1.21 (0.94-1.56)<br>1.23 (0.96-1.57)<br>1.56 (1.16-2.10)<br>1.77 (1.16-2.69)<br>0.002 | 1 (referent)<br>0.79 (0.59-1.06)<br>0.94 (0.70-1.26)<br>1.15 (0.87-1.52)<br>0.81 (0.54-1.23)<br>0.95 (0.51-1.77)<br>0.611 | 0.02          | 1 (referent)<br>0.98 (0.79-1.22)<br>1.06 (0.85-1.31)<br>1.05 (0.85-1.30)<br>1.21 (0.93-1.57)<br>1.42 (0.97-2.08)<br>0.072 | 1 (referent)<br>0.97 (0.64-1.46)<br>1.19 (0.79-1.78)<br>1.61 (1.11-2.34)<br>1.40 (0.84-2.32)<br>1.37 (0.63-2.98)<br>0.012 | 0.465         | 1 (referent)<br>0.96 (0.78-1.19)<br>1.01 (0.81-1.27)<br>1.17 (0.94-1.45)<br>0.93 (0.66-1.31)<br>1.47 (0.89-2.43)<br>0.21  | 1 (referent)<br>1.21 (0.53-2.74)<br>1.29 (0.60-2.78)<br>1.05 (0.50-2.22)<br>1.45 (0.67-3.11)<br>1.36 (0.58-3.20)<br>0.403 | 0.686         | ESH classification<br>< 120<br>120-129<br>130-139<br>140-159<br>160-179<br>>= 180<br>p-trend                                  |
| 1 (referent)<br>0.85 (0.69-1.05)<br>1.10 (0.89-1.36)<br>1.23 (1.01-1.49)<br>1.34 (0.99-1.82)<br>0.83 (0.39-1.76)<br>0.012 | 0.292         | 1 (referent)<br>0.93 (0.75-1.15)<br>1.03 (0.82-1.31)<br>1.33 (1.08-1.64)<br>1.36 (0.98-1.90)<br>0.97 (0.46-2.08)<br>0.006 | 1 (referent)<br>1.01 (0.79-1.30)<br>1.00 (0.74-1.34)<br>0.90 (0.68-1.21)<br>1.39 (0.91-2.12)<br>0.72 (0.23-2.28)<br>0.92  | 0.044         | 1 (referent)<br>0.90 (0.75-1.09)<br>0.95 (0.77-1.17)<br>1.18 (0.98-1.42)<br>1.21 (0.89-1.63)<br>0.76 (0.36-1.61)<br>0.118 | 1 (referent)<br>1.24 (0.90-1.73)<br>1.31 (0.90-1.90)<br>1.18 (0.82-1.72)<br>2.18 (1.32-3.60)<br>1.44 (0.45-4.61)<br>0.024 | 0.615         | 1 (referent)<br>0.93 (0.77-1.13)<br>0.95 (0.75-1.19)<br>1.05 (0.84-1.31)<br>1.36 (0.93-2.01)<br>0.77 (0.25-2.40)<br>0.462 | 1 (referent)<br>0.81 (0.50-1.31)<br>0.89 (0.55-1.43)<br>1.04 (0.68-1.59)<br>1.14 (0.68-1.91)<br>0.96 (0.40-2.34)<br>0.38  | 0.535         | Diastolic Blood Pressure (mmHg)<br>ESH classification<br>< 80<br>80-84<br>85-89<br>90-99<br>100-109<br>>= 110<br>p-trend      |
| 1 (referent)<br>1.06 (0.84-1.32)<br>1.16 (0.92-1.47)<br>1.32 (1.01-1.72)<br>0.02                                          | 0.63          | 1 (referent)<br>1.19 (0.95-1.48)<br>1.23 (0.96-1.57)<br>1.60 (1.21-2.12)<br>0.002                                         | 1 (referent)<br>0.86 (0.67-1.10)<br>1.15 (0.87-1.51)<br>0.84 (0.58-1.22)<br>0.904                                         | 0.009         | 1 (referent)<br>1.02 (0.84-1.22)<br>1.05 (0.85-1.29)<br>1.25 (0.98-1.60)<br>0.098                                         | 1 (referent)<br>1.07 (0.76-1.52)<br>1.60 (1.10-2.32)<br>1.38 (0.86-2.21)<br>0.022                                         | 0.509         | 1 (referent)<br>0.98 (0.82-1.18)<br>1.16 (0.93-1.44)<br>1.03 (0.76-1.40)<br>0.34                                          | 1 (referent)<br>1.26 (0.60-2.65)<br>1.05 (0.50-2.21)<br>1.42 (0.67-3.03)<br>0.366                                         | 0.564         | Systolic Blood Pressure (mmHg)<br>ASH classification<br>< 120<br>120-139<br>140-159<br>>= 160<br>p-trend                      |
| 1 (referent)<br>0.96 (0.80-1.14)<br>1.22 (1.00-1.49)<br>1.25 (0.93-1.67)<br>0.029                                         | 0.687         | 1 (referent)<br>0.97 (0.81-1.17)<br>1.33 (1.08-1.64)<br>1.29 (0.94-1.76)<br>0.008                                         | 1 (referent)<br>1.01 (0.81-1.25)<br>0.91 (0.68-1.21)<br>1.27 (0.84-1.90)<br>0.778                                         | 0.069         | 1 (referent)<br>0.92 (0.78-1.08)<br>1.18 (0.98-1.42)<br>1.13 (0.84-1.50)<br>0.127                                         | 1 (referent)<br>1.27 (0.95-1.69)<br>1.19 (0.82-1.72)<br>2.05 (1.27-3.29)<br>0.015                                         | 0.48          | 1 (referent)<br>0.94 (0.79-1.11)<br>1.05 (0.84-1.31)<br>1.27 (0.88-1.84)<br>0.439                                         | 1 (referent)<br>0.85 (0.56-1.29)<br>1.04 (0.68-1.59)<br>1.10 (0.68-1.81)<br>0.374                                         | 0.524         | Diastolic Blood Pressure (mmHg)<br>ASH classification<br>< 80<br>80-89<br>90-99<br>>= 100<br>p-trend                          |
| 1 (referent)<br>0.87 (0.68-1.11)<br>0.97 (0.77-1.22)<br>1.13 (0.90-1.41)<br>0.077                                         | 0.764         | 1 (referent)<br>1.10 (0.86-1.41)<br>1.10 (0.86-1.41)<br>1.38 (1.08-1.76)<br>0.007                                         | 1 (referent)<br>0.79 (0.60-1.04)<br>0.96 (0.73-1.26)<br>0.90 (0.68-1.20)<br>0.826                                         | 0.008         | 1 (referent)<br>0.93 (0.76-1.15)<br>0.94 (0.76-1.15)<br>1.11 (0.90-1.36)<br>0.233                                         | 1 (referent)<br>1.03 (0.70-1.54)<br>1.44 (0.99-2.10)<br>1.43 (0.97-2.11)<br>0.025                                         | 0.505         | 1 (referent)<br>0.88 (0.72-1.08)<br>1.02 (0.83-1.25)<br>1.03 (0.82-1.28)<br>0.547                                         | 1 (referent)<br>1.27 (0.55-2.94)<br>1.07 (0.48-2.38)<br>1.26 (0.58-2.73)<br>0.569                                         | 0.634         | Mean BP (mmHg) (1/3SBP+2/3DBP)<br>Cohort-specific quartiles<br>50.0-88.3<br>88.5-96.6<br>96.6-105.5<br>105.6-216.6<br>p-trend |
| 1 (referent)<br>1.18 (1.01-1.37)                                                                                          | 0.635         | 1 (referent)<br>1.21 (1.03-1.42)                                                                                          | 1 (referent)<br>1.08 (0.88-1.32)                                                                                          | 0.115         | 1 (referent)<br>1.11 (0.96-1.28)                                                                                          | 1 (referent)<br>1.35 (1.04-1.75)                                                                                          | 0.488         | -<br>1 (referent)                                                                                                         | -<br>1.32 (1.09-1.58)                                                                                                     |               | Hypertension (SBP >= 140 mmHg,<br>or DBP >= 90 mmHg, or self-reported)<br>Normotensive<br>Hypertensive                        |

| Uterine AC                                                                       |        | Excluding first 2 years of follow-up |                     |                     | Men                 | Women         | Sex           | BMI <= 25 mg/m <sup>2</sup> | BMI > 25 mg/m <sup>2</sup> | BMI           | Age <= 53 yrs       |
|----------------------------------------------------------------------------------|--------|--------------------------------------|---------------------|---------------------|---------------------|---------------|---------------|-----------------------------|----------------------------|---------------|---------------------|
| Cases                                                                            | Cohort | HR (crude)                           | HR (adjusted)       | HR (adjusted)       | HR (adjusted)       | HR (adjusted) | p-interaction | HR (adjusted)               | HR (adjusted)              | p-interaction | HR (adjusted)       |
| Cases                                                                            |        | 488                                  | 488                 | 431                 |                     |               |               | 202                         | 286                        |               | 181                 |
| Cohort size                                                                      |        | 194727                               | 194727              | 191551              |                     |               |               | 104416                      | 90311                      |               | 99069               |
| <b>Mean Systolic Blood Pressure continuous (per 10mmHg increase)</b>             | 488    | 307318                               | 1.116 (1.065-1.170) | 1.065 (1.013-1.119) | 1.069 (1.014-1.127) |               |               | 1.012 (0.932-1.098)         | 1.135 (1.067-1.207)        | 0.063         | 1.069 (0.977-1.169) |
| <b>Mean Diastolic Blood Pressure continuous (per 10mmHg increase)</b>            | 488    | 307318                               | 1.215 (1.115-1.325) | 1.112 (1.015-1.218) | 1.133 (1.028-1.248) |               |               | 1.040 (0.897-1.205)         | 1.232 (1.100-1.381)        | 0.125         | 1.103 (0.947-1.283) |
| <b>Mean Blood Pressure (1/3SBP+2/3DBP) continuous (per 10mmHg increase)</b>      | 488    | 307318                               | 1.196 (1.112-1.286) | 1.106 (1.024-1.195) | 1.120 (1.032-1.215) |               |               | 1.028 (0.907-1.166)         | 1.223 (1.111-1.345)        | 0.063         | 1.102 (0.966-1.258) |
| <b>Systolic Blood Pressure (mmHg) ESH classification</b>                         |        |                                      |                     |                     |                     |               |               |                             |                            |               |                     |
| < 120                                                                            | 91     | 86141                                | 1 (referent)        | 1 (referent)        | 1 (referent)        |               |               | 1 (referent)                | 1 (referent)               |               | 1 (referent)        |
| 120-129                                                                          | 73     | 66446                                | 0.95 (0.69-1.30)    | 0.86 (0.63-1.18)    | 0.88 (0.63-1.23)    |               |               | 0.81 (0.53-1.24)            | 1.00 (0.62-1.61)           |               | 0.69 (0.44-1.08)    |
| 130-139                                                                          | 97     | 57482                                | 1.39 (1.03-1.86)    | 1.18 (0.87-1.59)    | 1.19 (0.86-1.64)    |               |               | 1.28 (0.85-1.93)            | 1.29 (0.82-2.02)           |               | 1.28 (0.85-1.95)    |
| 140-159                                                                          | 150    | 68235                                | 1.65 (1.24-2.18)    | 1.29 (0.96-1.71)    | 1.37 (1.01-1.86)    |               |               | 1.02 (0.66-1.57)            | 1.77 (1.17-2.70)           | 0.175         | 1.33 (0.86-2.06)    |
| 160-179                                                                          | 56     | 22656                                | 1.67 (1.17-2.39)    | 1.26 (0.87-1.83)    | 1.25 (0.84-1.86)    |               |               | 1.20 (0.65-2.19)            | 1.66 (1.01-2.74)           |               | 1.09 (0.50-2.34)    |
| >= 180                                                                           | 21     | 6358                                 | 2.31 (1.40-3.82)    | 1.66 (1.00-2.77)    | 1.72 (1.01-2.95)    |               |               | 1.33 (0.51-3.49)            | 2.45 (1.30-4.61)           |               | 2.54 (0.89-7.23)    |
| p-trend                                                                          |        |                                      | 0.000002            | 0.007               | 0.007               |               |               | 0.35                        | 0.0002                     |               | 0.046               |
| <b>Diastolic Blood Pressure (mmHg) ESH classification</b>                        |        |                                      |                     |                     |                     |               |               |                             |                            |               |                     |
| < 80                                                                             | 157    | 132590                               | 1 (referent)        | 1 (referent)        | 1 (referent)        |               |               | 1 (referent)                | 1 (referent)               |               | 1 (referent)        |
| 80-84                                                                            | 103    | 64872                                | 1.22 (0.94-1.57)    | 1.11 (0.86-1.43)    | 1.10 (0.83-1.44)    |               |               | 1.03 (0.72-1.48)            | 1.28 (0.89-1.84)           |               | 1.45 (0.99-2.11)    |
| 85-89                                                                            | 69     | 41500                                | 1.25 (0.94-1.67)    | 1.12 (0.80-1.44)    | 1.12 (0.82-1.53)    |               |               | 0.78 (0.47-1.27)            | 1.46 (1.00-2.13)           |               | 0.92 (0.54-1.56)    |
| 90-99                                                                            | 123    | 51196                                | 1.75 (1.37-2.24)    | 1.42 (1.10-1.83)    | 1.51 (1.16-1.98)    |               |               | 1.23 (0.82-1.84)            | 1.86 (1.33-2.61)           | 0.063         | 1.45 (0.93-2.25)    |
| 100-109                                                                          | 33     | 13896                                | 1.86 (1.27-2.74)    | 1.45 (0.98-2.14)    | 1.49 (0.98-2.26)    |               |               | 0.93 (0.40-2.16)            | 2.16 (1.36-3.43)           |               | 1.81 (0.91-3.61)    |
| >= 110                                                                           | 3      | 3264                                 | 0.95 (0.30-3.00)    | 0.69 (0.22-2.17)    | 0.81 (0.26-2.57)    |               |               | no cases                    | 1.20 (0.37-3.84)           |               | 0.93 (0.13-6.79)    |
| p-trend                                                                          |        |                                      | 0.000008            | 0.016               | 0.005               |               |               | 0.885                       | 0.00008                    |               | 0.127               |
| <b>Systolic Blood Pressure (mmHg) ASH classification</b>                         |        |                                      |                     |                     |                     |               |               |                             |                            |               |                     |
| < 120                                                                            | 91     | 86141                                | 1 (referent)        | 1 (referent)        | 1 (referent)        |               |               | 1 (referent)                | 1 (referent)               |               | 1 (referent)        |
| 120-139                                                                          | 170    | 123928                               | 1.15 (0.88-1.49)    | 1.01 (0.78-1.32)    | 1.02 (0.77-1.36)    |               |               | 1.01 (0.71-1.43)            | 1.14 (0.76-1.73)           |               | 0.93 (0.65-1.34)    |
| 140-159                                                                          | 150    | 68235                                | 1.63 (1.23-2.15)    | 1.27 (0.95-1.69)    | 1.35 (0.99-1.83)    |               |               | 1.00 (0.65-1.54)            | 1.76 (1.16-2.67)           | 0.157         | 1.30 (0.84-2.01)    |
| >= 160                                                                           | 77     | 29014                                | 1.77 (1.27-2.48)    | 1.32 (0.94-1.87)    | 1.32 (0.91-1.92)    |               |               | 1.20 (0.68-2.09)            | 1.81 (1.13-2.89)           |               | 1.31 (0.68-2.52)    |
| p-trend                                                                          |        |                                      | 0.00003             | 0.032               | 0.03                |               |               | 0.663                       | 0.0007                     |               | 0.22                |
| <b>Diastolic Blood Pressure (mmHg) ASH classification</b>                        |        |                                      |                     |                     |                     |               |               |                             |                            |               |                     |
| < 80                                                                             | 157    | 132590                               | 1 (referent)        | 1 (referent)        | 1 (referent)        |               |               | 1 (referent)                | 1 (referent)               |               | 1 (referent)        |
| 80-89                                                                            | 172    | 106372                               | 1.23 (0.99-1.53)    | 1.09 (0.87-1.37)    | 1.11 (0.87-1.41)    |               |               | 0.94 (0.68-1.30)            | 1.35 (0.98-1.86)           |               | 1.26 (0.89-1.78)    |
| 90-99                                                                            | 123    | 51196                                | 1.75 (1.37-2.24)    | 1.42 (1.10-1.83)    | 1.51 (1.16-1.98)    |               |               | 1.23 (0.82-1.85)            | 1.86 (1.33-2.61)           | 0.088         | 1.46 (0.94-2.27)    |
| >= 100                                                                           | 36     | 17160                                | 1.73 (1.19-2.50)    | 1.33 (0.91-1.94)    | 1.38 (0.92-2.06)    |               |               | 0.82 (0.36-1.91)            | 2.00 (1.28-3.12)           |               | 1.68 (0.87-3.28)    |
| p-trend                                                                          |        |                                      | 0.000005            | 0.01                | 0.005               |               |               | 0.718                       | 0.00007                    |               | 0.04                |
| <b>Mean BP (mmHg) (1/3SBP+2/3DBP) Cohort-specific quartiles</b>                  |        |                                      |                     |                     |                     |               |               |                             |                            |               |                     |
| 50.0-88.3                                                                        | 80     | 76991                                | 1 (referent)        | 1 (referent)        | 1 (referent)        |               |               | 1 (referent)                | 1 (referent)               |               | 1 (referent)        |
| 88.5-96.6                                                                        | 109    | 77727                                | 1.22 (0.91-1.63)    | 1.10 (0.82-1.47)    | 1.12 (0.82-1.54)    |               |               | 1.06 (0.72-1.56)            | 1.26 (0.78-2.02)           |               | 1.05 (0.70-1.58)    |
| 96.8-105.5                                                                       | 119    | 76327                                | 1.33 (0.99-1.78)    | 1.10 (0.81-1.48)    | 1.13 (0.82-1.56)    |               |               | 1.07 (0.71-1.62)            | 1.32 (0.83-2.10)           | 0.069         | 1.15 (0.75-1.78)    |
| 105.6-216.6                                                                      | 180    | 76273                                | 1.87 (1.41-2.48)    | 1.41 (1.05-1.89)    | 1.50 (1.09-2.06)    |               |               | 1.13 (0.73-1.75)            | 2.02 (1.30-3.14)           |               | 1.42 (0.90-2.24)    |
| p-trend                                                                          |        |                                      | 0.000005            | 0.018               | 0.008               |               |               | 0.587                       | 0.0002                     |               | 0.131               |
| <b>Hypertension (SBP &gt;= 140 mmHg, or DBP &gt;= 90 mmHg, or self-reported)</b> |        |                                      |                     |                     |                     |               |               |                             |                            |               |                     |
| Normotensive                                                                     | 214    | 174179                               | 1 (referent)        | 1 (referent)        | 1 (referent)        |               |               | 1 (referent)                | 1 (referent)               |               | 1 (referent)        |
| Hypertensive                                                                     | 274    | 133139                               | 1.45 (1.20-1.75)    | 1.21 (0.99-1.47)    | 1.23 (0.99-1.51)    |               |               | 0.99 (0.73-1.35)            | 1.58 (1.22-2.06)           | 0.037         | 1.18 (0.85-1.62)    |



| Uterine Endometrioid AC                                                          |        | Excluding first 2 years of follow-up |                     |                     | Men                 | Women         | Sex           | BMI <= 25 mg/m <sup>2</sup> | BMI > 25 mg/m <sup>2</sup> | BMI              | Age <= 53 yrs       |
|----------------------------------------------------------------------------------|--------|--------------------------------------|---------------------|---------------------|---------------------|---------------|---------------|-----------------------------|----------------------------|------------------|---------------------|
| Cases                                                                            | Cohort | HR (crude)                           | HR (adjusted)       | HR (adjusted)       | HR (adjusted)       | HR (adjusted) | p-interaction | HR (adjusted)               | HR (adjusted)              | p-interaction    | HR (adjusted)       |
| Cases                                                                            |        | 546                                  | 546                 | 495                 |                     |               |               | 214                         | 332                        |                  | 173                 |
| Cohort size                                                                      |        | 194727                               | 194727              | 191551              |                     |               |               | 104416                      | 90311                      |                  | 99069               |
| <b>Mean Systolic Blood Pressure continuous (per 10mmHg increase)</b>             | 546    | 307318                               | 1.052 (1.007-1.099) | 1.003 (0.958-1.050) | 1.003 (0.956-1.053) |               |               | 0.972 (0.900-1.050)         | 1.052 (0.994-1.113)        | 0.186            | 0.949 (0.863-1.043) |
| <b>Mean Diastolic Blood Pressure continuous (per 10mmHg increase)</b>            | 546    | 307318                               | 1.092 (1.008-1.183) | 1.016 (0.934-1.105) | 1.006 (0.921-1.099) |               |               | 0.980 (0.852-1.127)         | 1.090 (0.984-1.208)        | 0.284            | 0.934 (0.799-1.092) |
| <b>Mean Blood Pressure (1/3SBP+2/3DBP) continuous (per 10mmHg increase)</b>      | 546    | 307318                               | 1.085 (1.015-1.160) | 1.010 (0.940-1.084) | 1.005 (0.933-1.084) |               |               | 0.969 (0.861-1.090)         | 1.085 (0.995-1.184)        | 0.195            | 0.931 (0.811-1.068) |
| <b>Systolic Blood Pressure (mmHg) ESH classification</b>                         |        |                                      |                     |                     |                     |               |               |                             |                            |                  |                     |
| < 120                                                                            | 126    | 86141                                | 1 (referent)        | 1 (referent)        | 1 (referent)        |               |               | 1 (referent)                | 1 (referent)               |                  | 1 (referent)        |
| 120-129                                                                          | 108    | 66446                                | 1.13 (0.87-1.46)    | 1.03 (0.79-1.33)    | 1.01 (0.79-1.33)    |               |               | 1.14 (0.79-1.65)            | 1.03 (0.71-1.50)           |                  | 1.30 (0.89-1.92)    |
| 130-139                                                                          | 105    | 57482                                | 1.21 (0.93-1.58)    | 1.03 (0.78-1.35)    | 1.01 (0.76-1.34)    |               |               | 1.09 (0.72-1.63)            | 1.13 (0.78-1.63)           |                  | 1.00 (0.63-1.57)    |
| 140-159                                                                          | 140    | 68235                                | 1.33 (1.03-1.71)    | 1.06 (0.82-1.38)    | 1.05 (0.80-1.38)    |               |               | 0.98 (0.65-1.48)            | 1.28 (0.90-1.81)           | 0.247            | 0.96 (0.59-1.56)    |
| 160-179                                                                          | 51     | 22656                                | 1.43 (1.02-2.00)    | 1.10 (0.77-1.55)    | 1.09 (0.76-1.57)    |               |               | 0.95 (0.49-1.84)            | 1.39 (0.90-2.13)           |                  | 0.82 (0.34-1.94)    |
| >= 180                                                                           | 16     | 6358                                 | 1.56 (0.92-2.66)    | 1.13 (0.66-1.94)    | 1.09 (0.62-1.94)    |               |               | 0.97 (0.30-3.16)            | 1.47 (0.79-2.76)           |                  | 0.59 (0.08-4.30)    |
| p-trend                                                                          |        |                                      | 0.006               | 0.516               | 0.6                 |               |               | 0.843                       | 0.041                      |                  | 0.5                 |
| <b>Diastolic Blood Pressure (mmHg) ESH classification</b>                        |        |                                      |                     |                     |                     |               |               |                             |                            |                  |                     |
| < 80                                                                             | 244    | 132590                               | 1 (referent)        | 1 (referent)        | 1 (referent)        |               |               | 1 (referent)                | 1 (referent)               |                  | 1 (referent)        |
| 80-84                                                                            | 105    | 64872                                | 0.99 (0.79-1.25)    | 0.90 (0.71-1.14)    | 0.90 (0.71-1.15)    |               |               | 1.10 (0.78-1.55)            | 0.84 (0.61-1.15)           |                  | 1.10 (0.75-1.61)    |
| 85-89                                                                            | 74     | 41500                                | 1.06 (0.82-1.38)    | 0.93 (0.71-1.22)    | 0.88 (0.67-1.17)    |               |               | 0.82 (0.51-1.35)            | 1.06 (0.77-1.46)           |                  | 0.68 (0.39-1.17)    |
| 90-99                                                                            | 91     | 51196                                | 1.23 (0.96-1.57)    | 1.04 (0.81-1.33)    | 0.99 (0.76-1.29)    |               |               | 1.09 (0.69-1.70)            | 1.14 (0.84-1.54)           | 0.414            | 0.73 (0.43-1.23)    |
| 100-109                                                                          | 29     | 13896                                | 1.59 (1.08-2.35)    | 1.32 (0.89-1.96)    | 1.32 (0.87-2.00)    |               |               | 1.12 (0.45-2.75)            | 1.57 (1.01-2.44)           |                  | 1.23 (0.56-2.71)    |
| >= 110                                                                           | 3      | 3264                                 | 0.72 (0.23-2.25)    | 0.54 (0.17-1.71)    | 0.61 (0.19-1.92)    |               |               | no cases                    | 0.75 (0.24-2.37)           |                  | no cases            |
| p-trend                                                                          |        |                                      | 0.036               | 0.634               | 0.873               |               |               | 0.911                       | 0.117                      |                  | 0.188               |
| <b>Systolic Blood Pressure (mmHg) ASH classification</b>                         |        |                                      |                     |                     |                     |               |               |                             |                            |                  |                     |
| < 120                                                                            | 126    | 86141                                | 1 (referent)        | 1 (referent)        | 1 (referent)        |               |               | 1 (referent)                | 1 (referent)               |                  | 1 (referent)        |
| 120-139                                                                          | 213    | 123928                               | 1.17 (0.93-1.46)    | 1.03 (0.82-1.29)    | 1.01 (0.80-1.28)    |               |               | 1.12 (0.81-1.54)            | 1.08 (0.78-1.50)           |                  | 1.17 (0.83-1.67)    |
| 140-159                                                                          | 140    | 68235                                | 1.32 (1.03-1.71)    | 1.06 (0.82-1.38)    | 1.05 (0.80-1.38)    |               |               | 0.98 (0.65-1.48)            | 1.28 (0.90-1.81)           | 0.275            | 0.97 (0.60-1.58)    |
| >= 160                                                                           | 67     | 29014                                | 1.45 (1.06-1.99)    | 1.10 (0.80-1.52)    | 1.09 (0.78-1.53)    |               |               | 0.96 (0.53-1.75)            | 1.40 (0.94-2.10)           |                  | 0.78 (0.35-1.77)    |
| p-trend                                                                          |        |                                      | 0.008               | 0.508               | 0.584               |               |               | 0.886                       | 0.048                      |                  | 0.729               |
| <b>Diastolic Blood Pressure (mmHg) ASH classification</b>                        |        |                                      |                     |                     |                     |               |               |                             |                            |                  |                     |
| < 80                                                                             | 244    | 132590                               | 1 (referent)        | 1 (referent)        | 1 (referent)        |               |               | 1 (referent)                | 1 (referent)               |                  | 1 (referent)        |
| 80-89                                                                            | 179    | 106372                               | 1.02 (0.84-1.24)    | 0.91 (0.75-1.12)    | 0.90 (0.73-1.10)    |               |               | 1.00 (0.73-1.36)            | 0.93 (0.72-1.21)           |                  | 0.94 (0.67-1.33)    |
| 90-99                                                                            | 91     | 51196                                | 1.23 (0.96-1.57)    | 1.04 (0.81-1.34)    | 0.99 (0.76-1.29)    |               |               | 1.09 (0.70-1.70)            | 1.14 (0.84-1.54)           | 0.599            | 0.73 (0.43-1.23)    |
| >= 100                                                                           | 32     | 17160                                | 1.43 (0.99-2.08)    | 1.17 (0.80-1.70)    | 1.18 (0.79-1.75)    |               |               | 0.94 (0.38-2.32)            | 1.40 (0.92-2.14)           |                  | 0.99 (0.45-2.17)    |
| p-trend                                                                          |        |                                      | 0.032               | 0.581               | 0.768               |               |               | 0.867                       | 0.145                      |                  | 0.409               |
| <b>Mean BP (mmHg) (1/3SBP+2/3DBP) Cohort-specific quartiles</b>                  |        |                                      |                     |                     |                     |               |               |                             |                            |                  |                     |
| 50.0-88.3                                                                        | 126    | 76991                                | 1 (referent)        | 1 (referent)        | 1 (referent)        |               |               | 1 (referent)                | 1 (referent)               |                  | 1 (referent)        |
| 88.5-96.6                                                                        | 115    | 77727                                | 0.93 (0.72-1.20)    | 0.85 (0.66-1.10)    | 0.89 (0.68-1.17)    |               |               | 0.90 (0.63-1.30)            | 0.86 (0.60-1.25)           |                  | 1.10 (0.74-1.63)    |
| 96.8-105.5                                                                       | 155    | 76327                                | 1.21 (0.95-1.54)    | 1.01 (0.79-1.29)    | 1.02 (0.78-1.32)    |               |               | 1.10 (0.77-1.59)            | 1.08 (0.77-1.52)           | 0.321            | 1.09 (0.71-1.66)    |
| 105.6-216.6                                                                      | 150    | 76273                                | 1.25 (0.97-1.60)    | 0.97 (0.75-1.26)    | 0.95 (0.72-1.25)    |               |               | 0.87 (0.57-1.35)            | 1.18 (0.84-1.66)           |                  | 0.82 (0.50-1.37)    |
| p-trend                                                                          |        |                                      | 0.021               | 0.787               | 0.963               |               |               | 0.857                       | 0.114                      |                  | 0.594               |
| <b>Hypertension (SBP &gt;= 140 mmHg, or DBP &gt;= 90 mmHg, or self-reported)</b> |        |                                      |                     |                     |                     |               |               |                             |                            |                  |                     |
| Normotensive                                                                     | 269    | 174179                               | 1 (referent)        | 1 (referent)        | 1 (referent)        | 1 (referent)  | 1 (referent)  | 1 (referent)                | 1 (referent)               | 0.062            | 1 (referent)        |
| Hypertensive                                                                     | 277    | 133139                               | 1.30 (1.09-1.55)    | 1.11 (0.92-1.33)    | 1.10 (0.91-1.33)    | NA (NA-NA)    | NA (NA-NA)    | NA                          | 0.93 (0.69-1.26)           | 1.36 (1.08-1.72) | 0.98 (0.70-1.37)    |





| Cervix Uteri                                                         |        | Excluding first 2 years of follow-up |                     |                     | Men                 | Women         | Sex           | BMI <= 25 mg/m <sup>2</sup> | BMI > 25 mg/m <sup>2</sup> | BMI              | Age <= 53 yrs       |
|----------------------------------------------------------------------|--------|--------------------------------------|---------------------|---------------------|---------------------|---------------|---------------|-----------------------------|----------------------------|------------------|---------------------|
| Cases                                                                | Cohort | HR (crude)                           | HR (adjusted)       | HR (adjusted)       | HR (adjusted)       | HR (adjusted) | p-interaction | HR (adjusted)               | HR (adjusted)              | p-interaction    | HR (adjusted)       |
| Cases                                                                |        | 223                                  | 223                 | 187                 |                     |               |               | 116                         | 107                        |                  | 108                 |
| Cohort size                                                          |        | 194727                               | 194727              | 191551              |                     |               |               | 104416                      | 90311                      |                  | 99069               |
| Mean Systolic Blood Pressure continuous (per 10mmHg increase)        | 223    | 194727                               | 0.988 (0.917-1.065) | 0.985 (0.912-1.064) | 1.011 (0.931-1.099) |               |               | 1.068 (0.958-1.190)         | 0.907 (0.814-1.010)        | 0.184            | 1.061 (0.937-1.201) |
| Mean Diastolic Blood Pressure continuous (per 10mmHg increase)       | 223    | 194727                               | 0.990 (0.868-1.129) | 0.982 (0.857-1.124) | 1.013 (0.874-1.174) |               |               | 1.045 (0.863-1.266)         | 0.920 (0.761-1.113)        | 0.35             | 1.094 (0.897-1.335) |
| Mean Blood Pressure (1/3SBP+2/3DBP) continuous (per 10mmHg increase) | 223    | 194727                               | 0.986 (0.882-1.103) | 0.980 (0.872-1.101) | 1.015 (0.895-1.152) |               |               | 1.074 (0.911-1.266)         | 0.889 (0.754-1.047)        | 0.225            | 1.093 (0.915-1.305) |
| Systolic Blood Pressure (mmHg) ESH classification                    |        |                                      |                     |                     |                     |               |               |                             |                            |                  |                     |
| < 120                                                                | 68     | 65461                                | 1 (referent)        | 1 (referent)        | 1 (referent)        |               |               | 1 (referent)                | 1 (referent)               |                  | 1 (referent)        |
| 120-129                                                              | 59     | 40944                                | 1.40 (0.98-2.00)    | 1.39 (0.97-2.00)    | 1.21 (0.80-1.83)    |               |               | 1.20 (0.75-1.93)            | 1.70 (0.93-3.09)           |                  | 1.26 (0.78-2.06)    |
| 130-139                                                              | 37     | 33415                                | 1.09 (0.72-1.67)    | 1.10 (0.72-1.68)    | 1.17 (0.74-1.85)    |               |               | 0.83 (0.44-1.56)            | 1.44 (0.76-2.72)           |                  | 1.66 (0.96-2.87)    |
| 140-159                                                              | 33     | 38168                                | 0.80 (0.51-1.26)    | 0.80 (0.51-1.27)    | 0.91 (0.56-1.48)    |               |               | 0.50 (0.23-1.11)            | 1.05 (0.55-2.01)           | 0.478            | 0.72 (0.31-1.65)    |
| 160-179                                                              | 22     | 13066                                | 1.50 (0.89-2.54)    | 1.49 (0.87-2.55)    | 1.59 (0.89-2.84)    |               |               | 3.01 (1.54-5.88)            | 0.80 (0.33-1.93)           |                  | 2.23 (0.84-5.90)    |
| >= 180                                                               | 4      | 3673                                 | 0.95 (0.34-2.69)    | 0.91 (0.32-2.60)    | 1.16 (0.40-3.32)    |               |               | 1.80 (0.41-7.81)            | 0.62 (0.14-2.79)           |                  | 2.03 (0.27-15.36)   |
| p-trend                                                              |        |                                      | 0.923               | 0.887               | 0.568               |               |               | 0.41                        | 0.246                      |                  | 0.315               |
| Diastolic Blood Pressure (mmHg) ESH classification                   |        |                                      |                     |                     |                     |               |               |                             |                            |                  |                     |
| < 80                                                                 | 107    | 96352                                | 1 (referent)        | 1 (referent)        | 1 (referent)        |               |               | 1 (referent)                | 1 (referent)               |                  | 1 (referent)        |
| 80-84                                                                | 45     | 39059                                | 1.01 (0.71-1.44)    | 1.00 (0.70-1.43)    | 0.92 (0.61-1.38)    |               |               | 0.99 (0.60-1.63)            | 0.98 (0.59-1.65)           |                  | 1.26 (0.76-2.09)    |
| 85-89                                                                | 33     | 23956                                | 1.21 (0.81-1.80)    | 1.21 (0.81-1.81)    | 1.42 (0.93-2.17)    |               |               | 1.25 (0.69-2.25)            | 1.19 (0.68-2.07)           |                  | 1.97 (1.12-3.45)    |
| 90-99                                                                | 28     | 27199                                | 0.89 (0.58-1.37)    | 0.87 (0.56-1.34)    | 0.90 (0.56-1.45)    |               |               | 0.78 (0.38-1.59)            | 0.91 (0.52-1.59)           | 0.545            | 1.04 (0.51-2.10)    |
| 100-109                                                              | 10     | 6720                                 | 1.30 (0.68-2.52)    | 1.28 (0.66-2.50)    | 1.41 (0.69-2.85)    |               |               | 2.08 (0.81-5.31)            | 0.93 (0.36-2.38)           |                  | 1.51 (0.46-4.95)    |
| >= 110                                                               | 0      | 1441                                 |                     |                     |                     |               |               |                             |                            |                  |                     |
| p-trend                                                              |        |                                      | 0.949               | 0.842               | 0.769               |               |               | 0.75                        | 0.594                      |                  | 0.336               |
| Systolic Blood Pressure (mmHg) ASH classification                    |        |                                      |                     |                     |                     |               |               |                             |                            |                  |                     |
| < 120                                                                | 68     | 65461                                | 1 (referent)        | 1 (referent)        | 1 (referent)        |               |               | 1 (referent)                | 1 (referent)               |                  | 1 (referent)        |
| 120-139                                                              | 96     | 74359                                | 1.27 (0.92-1.76)    | 1.27 (0.91-1.78)    | 1.20 (0.83-1.73)    |               |               | 1.06 (0.69-1.64)            | 1.58 (0.91-2.74)           |                  | 1.40 (0.91-2.15)    |
| 140-159                                                              | 33     | 38168                                | 0.81 (0.52-1.27)    | 0.82 (0.52-1.29)    | 0.91 (0.56-1.49)    |               |               | 0.51 (0.23-1.13)            | 1.06 (0.55-2.03)           | 0.306            | 0.70 (0.31-1.62)    |
| >= 160                                                               | 26     | 16739                                | 1.41 (0.85-2.32)    | 1.39 (0.83-2.32)    | 1.50 (0.86-2.60)    |               |               | 2.84 (1.48-5.44)            | 0.77 (0.34-1.75)           |                  | 2.15 (0.87-5.34)    |
| p-trend                                                              |        |                                      | 0.672               | 0.697               | 0.427               |               |               | 0.15                        | 0.295                      |                  | 0.366               |
| Diastolic Blood Pressure (mmHg) ASH classification                   |        |                                      |                     |                     |                     |               |               |                             |                            |                  |                     |
| < 80                                                                 | 107    | 96352                                | 1 (referent)        | 1 (referent)        | 1 (referent)        |               |               | 1 (referent)                | 1 (referent)               |                  | 1 (referent)        |
| 80-89                                                                | 78     | 63015                                | 1.08 (0.80-1.46)    | 1.08 (0.79-1.46)    | 1.10 (0.79-1.54)    |               |               | 1.07 (0.70-1.64)            | 1.06 (0.69-1.65)           |                  | 1.49 (0.97-2.29)    |
| 90-99                                                                | 28     | 27199                                | 0.89 (0.58-1.37)    | 0.87 (0.56-1.34)    | 0.90 (0.56-1.44)    |               |               | 0.77 (0.38-1.59)            | 0.91 (0.52-1.59)           | 0.533            | 1.02 (0.50-2.08)    |
| >= 100                                                               | 10     | 8161                                 | 1.07 (0.55-2.06)    | 1.03 (0.53-2.01)    | 1.13 (0.56-2.29)    |               |               | 1.76 (0.69-4.48)            | 0.73 (0.28-1.86)           |                  | 1.19 (0.36-3.93)    |
| p-trend                                                              |        |                                      | 0.916               | 0.804               | 0.986               |               |               | 0.762                       | 0.543                      |                  | 0.451               |
| Mean BP (mmHg) (1/3SBP+2/3DBP) Cohort-specific quartiles             |        |                                      |                     |                     |                     |               |               |                             |                            |                  |                     |
| 50.0-88.3                                                            | 67     | 59270                                | 1 (referent)        | 1 (referent)        | 1 (referent)        |               |               | 1 (referent)                | 1 (referent)               |                  | 1 (referent)        |
| 88.5-96.6                                                            | 60     | 49321                                | 1.09 (0.76-1.56)    | 1.09 (0.76-1.57)    | 1.06 (0.70-1.58)    |               |               | 1.03 (0.64-1.64)            | 1.14 (0.64-2.04)           |                  | 1.37 (0.85-2.21)    |
| 96.8-105.5                                                           | 50     | 44981                                | 0.99 (0.67-1.46)    | 0.98 (0.66-1.46)    | 1.13 (0.74-1.73)    |               |               | 0.83 (0.47-1.47)            | 1.07 (0.60-1.93)           | 0.512            | 1.45 (0.83-2.53)    |
| 105.6-216.6                                                          | 46     | 41155                                | 0.94 (0.62-1.42)    | 0.92 (0.60-1.41)    | 1.01 (0.64-1.61)    |               |               | 1.24 (0.69-2.21)            | 0.76 (0.41-1.41)           |                  | 1.15 (0.57-2.32)    |
| p-trend                                                              |        |                                      | 0.697               | 0.637               | 0.875               |               |               | 0.761                       | 0.293                      |                  | 0.392               |
| Hypertension (SBP >= 140 mmHg, or DBP >= 90 mmHg, or self-reported)  |        |                                      |                     |                     |                     |               |               |                             |                            |                  |                     |
| Normotensive                                                         | 136    | 117264                               | 1 (referent)        | 1 (referent)        | 1 (referent)        | 1 (referent)  | 1 (referent)  | 1 (referent)                | 1 (referent)               | 0.342            | 1 (referent)        |
| Hypertensive                                                         | 87     | 77463                                | 0.92 (0.69-1.23)    | 0.91 (0.68-1.23)    | 0.96 (0.70-1.33)    | NA (NA-NA)    | NA (NA-NA)    | NA                          | 1.08 (0.71-1.64)           | 0.77 (0.52-1.16) | 1.08 (0.69-1.70)    |

| Age > 53 yrs                                                                                                              | Age           | Never smokers                                                                                                             | Ever smokers                                                                                                              | Smoking       | Alcohol <= 12g                                                                                                            | Alcohol > 12g                                                                                                             | Alcohol       | No antihypertensive treatment                                                                                             | Antihypertensive treatment                                                                            | Treatment     | Cervix Uteri                                                                                                               |
|---------------------------------------------------------------------------------------------------------------------------|---------------|---------------------------------------------------------------------------------------------------------------------------|---------------------------------------------------------------------------------------------------------------------------|---------------|---------------------------------------------------------------------------------------------------------------------------|---------------------------------------------------------------------------------------------------------------------------|---------------|---------------------------------------------------------------------------------------------------------------------------|-------------------------------------------------------------------------------------------------------|---------------|----------------------------------------------------------------------------------------------------------------------------|
| HR (adjusted)                                                                                                             | p-interaction | HR (adjusted)                                                                                                             | HR (adjusted)                                                                                                             | p-interaction | HR (adjusted)                                                                                                             | HR (adjusted)                                                                                                             | p-interaction | HR (adjusted)                                                                                                             | HR (adjusted)                                                                                         | p-interaction |                                                                                                                            |
| 115<br>95658                                                                                                              |               | 100<br>106077                                                                                                             | 121<br>85755                                                                                                              |               | 173<br>149170                                                                                                             | 50<br>45557                                                                                                               |               | 165<br>147109                                                                                                             | 28<br>23736                                                                                           |               | Cases<br>Cohort size                                                                                                       |
| 0.937 (0.849-1.033)                                                                                                       | 0.136         | 0.992 (0.884-1.112)                                                                                                       | 0.977 (0.880-1.085)                                                                                                       | 0.542         | 0.995 (0.911-1.086)                                                                                                       | 0.934 (0.795-1.098)                                                                                                       | 0.657         | 0.997 (0.907-1.097)                                                                                                       | 0.861 (0.696-1.066)                                                                                   | 0.495         | Mean Systolic Blood Pressure continuous (per 10mmHg increase)                                                              |
| 0.889 (0.737-1.071)                                                                                                       | 0.116         | 0.960 (0.783-1.178)                                                                                                       | 0.993 (0.826-1.193)                                                                                                       | 0.778         | 0.959 (0.821-1.120)                                                                                                       | 1.006 (0.759-1.334)                                                                                                       | 0.528         | 1.001 (0.848-1.182)                                                                                                       | 0.824 (0.562-1.208)                                                                                   | 0.578         | Mean Diastolic Blood Pressure continuous (per 10mmHg increase)                                                             |
| 0.897 (0.768-1.047)                                                                                                       | 0.099         | 0.974 (0.817-1.161)                                                                                                       | 0.979 (0.836-1.146)                                                                                                       | 0.637         | 0.976 (0.854-1.115)                                                                                                       | 0.952 (0.747-1.212)                                                                                                       | 0.91          | 0.999 (0.864-1.154)                                                                                                       | 0.800 (0.571-1.119)                                                                                   | 0.484         | Mean Blood Pressure (1/3SBP+2/3DBP) continuous (per 10mmHg increase)                                                       |
| 1 (referent)<br>1.46 (0.83-2.55)<br>0.71 (0.37-1.38)<br>0.74 (0.41-1.34)<br>1.18 (0.60-2.31)<br>0.68 (0.20-2.34)<br>0.263 | 0.151         | 1 (referent)<br>1.12 (0.63-1.98)<br>1.11 (0.60-2.07)<br>0.68 (0.34-1.36)<br>1.24 (0.56-2.76)<br>1.17 (0.33-4.15)<br>0.827 | 1 (referent)<br>1.71 (1.07-2.74)<br>0.99 (0.54-1.84)<br>0.94 (0.51-1.74)<br>1.68 (0.80-3.50)<br>0.50 (0.07-3.79)<br>0.951 | 0.713         | 1 (referent)<br>1.40 (0.93-2.11)<br>1.01 (0.61-1.66)<br>0.77 (0.45-1.32)<br>1.66 (0.92-3.00)<br>0.92 (0.28-3.06)<br>0.988 | 1 (referent)<br>1.35 (0.60-3.01)<br>1.46 (0.61-3.47)<br>0.85 (0.33-2.18)<br>0.90 (0.24-3.44)<br>0.74 (0.09-6.20)<br>0.621 | 0.79          | 1 (referent)<br>1.38 (0.93-2.05)<br>1.09 (0.67-1.77)<br>0.57 (0.31-1.04)<br>1.69 (0.87-3.27)<br>1.63 (0.49-5.41)<br>0.873 | single case in referent<br>-<br>-<br>-<br>-<br>-<br>-                                                 | -             | ESH classification<br>< 120<br>120-129<br>130-139<br>140-159<br>160-179<br>>= 180<br>p-trend                               |
| 1 (referent)<br>0.80 (0.48-1.31)<br>0.76 (0.43-1.37)<br>0.72 (0.41-1.25)<br>1.07 (0.48-2.40)<br>0.252                     | 0.123         | 1 (referent)<br>0.93 (0.54-1.61)<br>1.37 (0.78-2.42)<br>0.63 (0.31-1.26)<br>1.66 (0.72-3.84)<br>0.809                     | 1 (referent)<br>1.08 (0.67-1.74)<br>1.02 (0.56-1.86)<br>1.05 (0.59-1.87)<br>0.81 (0.25-2.63)<br>0.81                      | 0.599         | 1 (referent)<br>0.88 (0.58-1.34)<br>1.20 (0.76-1.90)<br>0.82 (0.50-1.36)<br>1.12 (0.51-2.46)<br>0.658                     | 1 (referent)<br>1.41 (0.69-2.92)<br>1.22 (0.50-2.97)<br>0.98 (0.39-2.42)<br>1.43 (0.38-5.39)<br>0.969                     | 0.554         | 1 (referent)<br>1.10 (0.74-1.64)<br>1.18 (0.72-1.93)<br>0.89 (0.51-1.55)<br>1.69 (0.73-3.95)<br>0.795                     | 1 (referent)<br>0.55 (0.13-2.31)<br>1.45 (0.47-4.48)<br>0.75 (0.25-2.27)<br>0.47 (0.09-2.47)<br>0.343 | 0.534         | ESH classification<br>< 80<br>80-84<br>85-89<br>90-99<br>100-109<br>>= 110<br>p-trend                                      |
| 1 (referent)<br>1.09 (0.64-1.84)<br>0.75 (0.41-1.37)<br>1.08 (0.56-2.08)<br>0.709                                         | 0.371         | 1 (referent)<br>1.11 (0.67-1.86)<br>0.68 (0.34-1.36)<br>1.23 (0.58-2.60)<br>0.896                                         | 1 (referent)<br>1.43 (0.91-2.23)<br>0.97 (0.53-1.81)<br>1.47 (0.72-3.02)<br>0.52                                          | 0.992         | 1 (referent)<br>1.24 (0.85-1.82)<br>0.79 (0.46-1.35)<br>1.54 (0.87-2.72)<br>0.525                                         | 1 (referent)<br>1.39 (0.68-2.88)<br>0.85 (0.33-2.17)<br>0.85 (0.25-2.90)<br>0.6                                           | 0.585         | 1 (referent)<br>1.27 (0.88-1.82)<br>0.57 (0.31-1.06)<br>1.71 (0.92-3.17)<br>0.76                                          | single case in referent<br>-<br>-<br>-<br>-                                                           | -             | ESH classification<br>< 120<br>120-139<br>140-159<br>>= 160<br>p-trend                                                     |
| 1 (referent)<br>0.78 (0.51-1.20)<br>0.72 (0.41-1.25)<br>0.87 (0.39-1.95)<br>0.297                                         | 0.182         | 1 (referent)<br>1.10 (0.70-1.73)<br>0.62 (0.31-1.25)<br>1.33 (0.57-3.06)<br>0.729                                         | 1 (referent)<br>1.06 (0.70-1.60)<br>1.05 (0.59-1.87)<br>0.68 (0.21-2.19)<br>0.856                                         | 0.681         | 1 (referent)<br>1.00 (0.71-1.41)<br>0.82 (0.50-1.35)<br>0.90 (0.41-1.99)<br>0.532                                         | 1 (referent)<br>1.34 (0.70-2.57)<br>0.98 (0.39-2.42)<br>1.17 (0.31-4.35)<br>0.827                                         | 0.393         | 1 (referent)<br>1.13 (0.80-1.60)<br>0.89 (0.51-1.54)<br>1.41 (0.60-3.28)<br>0.73                                          | 1 (referent)<br>0.99 (0.35-2.86)<br>0.74 (0.24-2.25)<br>0.36 (0.07-1.89)<br>0.198                     | 0.33          | ESH classification<br>< 80<br>80-89<br>90-99<br>>= 100<br>p-trend                                                          |
| 1 (referent)<br>0.80 (0.47-1.38)<br>0.64 (0.37-1.11)<br>0.68 (0.40-1.16)<br>0.134                                         | 0.098         | 1 (referent)<br>0.98 (0.55-1.75)<br>1.10 (0.61-1.98)<br>0.87 (0.46-1.67)<br>0.773                                         | 1 (referent)<br>1.21 (0.76-1.93)<br>0.85 (0.49-1.48)<br>0.96 (0.54-1.70)<br>0.651                                         | 0.563         | 1 (referent)<br>1.00 (0.66-1.50)<br>0.86 (0.55-1.37)<br>0.97 (0.60-1.55)<br>0.751                                         | 1 (referent)<br>1.58 (0.71-3.52)<br>1.43 (0.62-3.31)<br>0.70 (0.26-1.93)<br>0.506                                         | 0.892         | 1 (referent)<br>1.03 (0.69-1.55)<br>1.03 (0.66-1.61)<br>0.88 (0.52-1.49)<br>0.742                                         | two cases in referent<br>-<br>-<br>-<br>-                                                             | -             | Mean BP (mmHg) (1/3SBP+2/3DBP) Cohort-specific quartiles<br>50.0-88.3<br>88.5-96.6<br>96.8-105.5<br>105.6-216.6<br>p-trend |
| 1 (referent)<br>0.80 (0.54-1.17)                                                                                          | 0.26          | 1 (referent)<br>0.80 (0.51-1.25)                                                                                          | 1 (referent)<br>0.96 (0.64-1.44)                                                                                          | 0.989         | 1 (referent)<br>0.92 (0.65-1.29)                                                                                          | 1 (referent)<br>0.84 (0.45-1.57)                                                                                          | 0.803         | -<br>1 (referent)                                                                                                         | -<br>1.30 (0.78-2.16)                                                                                 | -             | Hypertension (SBP >= 140 mmHg, or DBP >= 90 mmHg, or self-reported)<br>Normotensive<br>Hypertensive                        |

| Cervix SCC                                                                       |        | Excluding first 2 years of follow-up |                     |                     | Men                 | Women         | Sex           | BMI <= 25 mg/m <sup>2</sup> | BMI > 25 mg/m <sup>2</sup> | BMI              | Age <= 53 yrs       |
|----------------------------------------------------------------------------------|--------|--------------------------------------|---------------------|---------------------|---------------------|---------------|---------------|-----------------------------|----------------------------|------------------|---------------------|
| Cases                                                                            | Cohort | HR (crude)                           | HR (adjusted)       | HR (adjusted)       | HR (adjusted)       | HR (adjusted) | p-interaction | HR (adjusted)               | HR (adjusted)              | p-interaction    | HR (adjusted)       |
| Cases                                                                            |        | 145                                  | 145                 | 120                 |                     |               |               | 77                          | 68                         |                  | 67                  |
| Cohort size                                                                      |        | 194727                               | 194727              | 191551              |                     |               |               | 104416                      | 90311                      |                  | 99069               |
| <b>Mean Systolic Blood Pressure continuous (per 10mmHg increase)</b>             | 145    | 307318                               | 0.909 (0.826-1.000) | 0.910 (0.825-1.004) | 0.937 (0.842-1.042) |               |               | 1.008 (0.876-1.159)         | 0.812 (0.707-0.933)        | 0.641            | 0.974 (0.823-1.152) |
| <b>Mean Diastolic Blood Pressure continuous (per 10mmHg increase)</b>            | 145    | 307318                               | 0.885 (0.750-1.045) | 0.884 (0.744-1.049) | 0.935 (0.776-1.127) |               |               | 1.039 (0.819-1.317)         | 0.737 (0.574-0.945)        | 0.193            | 0.957 (0.738-1.241) |
| <b>Mean Blood Pressure (1/3SBP+2/3DBP) continuous (per 10mmHg increase)</b>      | 145    | 307318                               | 0.877 (0.760-1.011) | 0.875 (0.754-1.015) | 0.920 (0.783-1.081) |               |               | 1.025 (0.834-1.260)         | 0.730 (0.589-0.904)        | 0.326            | 0.959 (0.758-1.215) |
| <b>Systolic Blood Pressure (mmHg) ESH classification</b>                         |        |                                      |                     |                     |                     |               |               |                             |                            |                  |                     |
| < 120                                                                            | 53     | 86141                                | 1 (referent)        | 1 (referent)        | 1 (referent)        |               |               | 1 (referent)                | 1 (referent)               |                  | 1 (referent)        |
| 120-129                                                                          | 34     | 66446                                | 0.96 (0.62-1.50)    | 0.97 (0.62-1.51)    | 0.90 (0.54-1.50)    |               |               | 0.71 (0.38-1.34)            | 1.44 (0.69-3.00)           |                  | 0.76 (0.39-1.49)    |
| 130-139                                                                          | 23     | 57482                                | 0.77 (0.46-1.29)    | 0.78 (0.46-1.32)    | 0.91 (0.52-1.59)    |               |               | 0.62 (0.28-1.38)            | 1.04 (0.47-2.29)           |                  | 1.38 (0.70-2.72)    |
| 140-159                                                                          | 21     | 68235                                | 0.53 (0.31-0.92)    | 0.54 (0.31-0.95)    | 0.66 (0.36-1.19)    |               |               | 0.37 (0.14-1.00)            | 0.69 (0.31-1.53)           | 0.894            | 0.55 (0.19-1.64)    |
| 160-179                                                                          | 12     | 22656                                | 0.83 (0.42-1.63)    | 0.83 (0.42-1.65)    | 0.90 (0.42-1.93)    |               |               | 2.00 (0.85-4.72)            | 0.38 (0.12-1.24)           |                  | 1.17 (0.27-5.14)    |
| >= 180                                                                           | 2      | 6358                                 | 0.48 (0.11-2.02)    | 0.45 (0.11-1.93)    | 0.61 (0.14-2.62)    |               |               | 1.07 (0.14-8.26)            | 0.26 (0.03-2.08)           |                  | no cases            |
| p-trend                                                                          |        |                                      | 0.046               | 0.057               | 0.288               |               |               | 0.662                       | 0.011                      |                  | 0.731               |
| <b>Diastolic Blood Pressure (mmHg) ESH classification</b>                        |        |                                      |                     |                     |                     |               |               |                             |                            |                  |                     |
| < 80                                                                             | 78     | 132590                               | 1 (referent)        | 1 (referent)        | 1 (referent)        |               |               | 1 (referent)                | 1 (referent)               |                  | 1 (referent)        |
| 80-84                                                                            | 25     | 64872                                | 0.74 (0.47-1.18)    | 0.74 (0.47-1.17)    | 0.77 (0.46-1.28)    |               |               | 0.74 (0.38-1.45)            | 0.70 (0.37-1.34)           |                  | 0.88 (0.44-1.74)    |
| 85-89                                                                            | 21     | 41500                                | 0.97 (0.59-1.58)    | 0.98 (0.60-1.62)    | 1.26 (0.75-2.11)    |               |               | 1.27 (0.63-2.57)            | 0.80 (0.39-1.61)           |                  | 1.76 (0.89-3.50)    |
| 90-99                                                                            | 16     | 51196                                | 0.65 (0.38-1.13)    | 0.64 (0.36-1.12)    | 0.72 (0.39-1.32)    |               |               | 0.60 (0.23-1.56)            | 0.61 (0.30-1.23)           | 0.546            | 0.42 (0.13-1.41)    |
| 100-109                                                                          | 5      | 13896                                | 0.82 (0.33-2.05)    | 0.81 (0.32-2.04)    | 0.85 (0.30-2.40)    |               |               | 1.65 (0.49-5.59)            | 0.42 (0.10-1.77)           |                  | 0.69 (0.09-5.15)    |
| >= 110                                                                           | 0      | 3264                                 | no cases            | no cases            | no cases            |               |               | no cases                    | no cases                   |                  | no cases            |
| p-trend                                                                          |        |                                      | 0.134               | 0.129               | 0.428               |               |               | 0.808                       | 0.059                      |                  | 0.529               |
| <b>Systolic Blood Pressure (mmHg) ASH classification</b>                         |        |                                      |                     |                     |                     |               |               |                             |                            |                  |                     |
| < 120                                                                            | 53     | 86141                                | 1 (referent)        | 1 (referent)        | 1 (referent)        |               |               | 1 (referent)                | 1 (referent)               |                  | 1 (referent)        |
| 120-139                                                                          | 57     | 123928                               | 0.88 (0.59-1.31)    | 0.89 (0.59-1.33)    | 0.90 (0.58-1.42)    |               |               | 0.68 (0.39-1.18)            | 1.25 (0.63-2.46)           |                  | 0.98 (0.57-1.69)    |
| 140-159                                                                          | 21     | 68235                                | 0.54 (0.31-0.93)    | 0.55 (0.31-0.96)    | 0.66 (0.36-1.19)    |               |               | 0.38 (0.14-1.01)            | 0.70 (0.31-1.55)           | 0.964            | 0.54 (0.18-1.61)    |
| >= 160                                                                           | 14     | 29014                                | 0.76 (0.40-1.45)    | 0.75 (0.39-1.46)    | 0.84 (0.41-1.71)    |               |               | 1.84 (0.80-4.23)            | 0.35 (0.12-1.06)           |                  | 0.92 (0.21-4.09)    |
| p-trend                                                                          |        |                                      | 0.089               | 0.105               | 0.313               |               |               | 0.845                       | 0.017                      |                  | 0.479               |
| <b>Diastolic Blood Pressure (mmHg) ASH classification</b>                        |        |                                      |                     |                     |                     |               |               |                             |                            |                  |                     |
| < 80                                                                             | 78     | 132590                               | 1 (referent)        | 1 (referent)        | 1 (referent)        |               |               | 1 (referent)                | 1 (referent)               |                  | 1 (referent)        |
| 80-89                                                                            | 46     | 106372                               | 0.83 (0.57-1.21)    | 0.83 (0.57-1.22)    | 0.95 (0.63-1.44)    |               |               | 0.92 (0.54-1.57)            | 0.74 (0.43-1.27)           |                  | 1.17 (0.68-2.02)    |
| 90-99                                                                            | 16     | 51196                                | 0.65 (0.38-1.13)    | 0.63 (0.36-1.11)    | 0.72 (0.39-1.31)    |               |               | 0.60 (0.23-1.56)            | 0.61 (0.30-1.23)           | 0.602            | 0.41 (0.12-1.39)    |
| >= 100                                                                           | 5      | 17160                                | 0.68 (0.27-1.69)    | 0.66 (0.26-1.65)    | 0.69 (0.24-1.93)    |               |               | 1.42 (0.42-4.77)            | 0.32 (0.08-1.36)           |                  | 0.53 (0.07-4.00)    |
| p-trend                                                                          |        |                                      | 0.095               | 0.088               | 0.259               |               |               | 0.654                       | 0.047                      |                  | 0.32                |
| <b>Mean BP (mmHg) (1/3SBP+2/3DBP) Cohort-specific quartiles</b>                  |        |                                      |                     |                     |                     |               |               |                             |                            |                  |                     |
| 50.0-88.3                                                                        | 49     | 76991                                | 1 (referent)        | 1 (referent)        | 1 (referent)        |               |               | 1 (referent)                | 1 (referent)               |                  | 1 (referent)        |
| 88.5-96.6                                                                        | 38     | 77727                                | 0.89 (0.58-1.38)    | 0.89 (0.57-1.39)    | 0.92 (0.56-1.52)    |               |               | 0.92 (0.52-1.63)            | 0.78 (0.39-1.58)           |                  | 1.00 (0.55-1.84)    |
| 96.8-105.5                                                                       | 32     | 76327                                | 0.76 (0.47-1.21)    | 0.76 (0.47-1.23)    | 0.96 (0.57-1.62)    |               |               | 0.78 (0.39-1.58)            | 0.67 (0.33-1.34)           | 0.759            | 1.16 (0.59-2.31)    |
| 105.6-216.6                                                                      | 26     | 76273                                | 0.61 (0.37-1.02)    | 0.61 (0.36-1.03)    | 0.73 (0.41-1.31)    |               |               | 0.93 (0.44-1.98)            | 0.39 (0.18-0.84)           |                  | 0.64 (0.23-1.75)    |
| p-trend                                                                          |        |                                      | 0.05                | 0.057               | 0.35                |               |               | 0.675                       | 0.013                      |                  | 0.685               |
| <b>Hypertension (SBP &gt;= 140 mmHg, or DBP &gt;= 90 mmHg, or self-reported)</b> |        |                                      |                     |                     |                     |               |               |                             |                            |                  |                     |
| Normotensive                                                                     | 94     | 174179                               | 1 (referent)        | 1 (referent)        | 1 (referent)        | 1 (referent)  | 1 (referent)  | 1 (referent)                | 1 (referent)               | 0.863            | 1 (referent)        |
| Hypertensive                                                                     | 51     | 133139                               | 0.71 (0.50-1.02)    | 0.71 (0.49-1.03)    | 0.77 (0.51-1.15)    | NA (NA-NA)    | NA (NA-NA)    | NA                          | 0.85 (0.50-1.46)           | 0.58 (0.35-0.97) | 0.59 (0.30-1.14)    |

| Age > 53 yrs                                                                                                              | Age           | Never smokers                                                                                                             | Ever smokers                                                                                                              | Smoking       | Alcohol <= 12g                                                                                                            | Alcohol > 12g                                                                                                             | Alcohol       | No antihypertensive treatment                                                                                             | Antihypertensive treatment                                                                                        | Treatment     |                                                                                                                             |
|---------------------------------------------------------------------------------------------------------------------------|---------------|---------------------------------------------------------------------------------------------------------------------------|---------------------------------------------------------------------------------------------------------------------------|---------------|---------------------------------------------------------------------------------------------------------------------------|---------------------------------------------------------------------------------------------------------------------------|---------------|---------------------------------------------------------------------------------------------------------------------------|-------------------------------------------------------------------------------------------------------------------|---------------|-----------------------------------------------------------------------------------------------------------------------------|
| HR (adjusted)                                                                                                             | p-interaction | HR (adjusted)                                                                                                             | HR (adjusted)                                                                                                             | p-interaction | HR (adjusted)                                                                                                             | HR (adjusted)                                                                                                             | p-interaction | HR (adjusted)                                                                                                             | HR (adjusted)                                                                                                     | p-interaction |                                                                                                                             |
| 78<br>95658                                                                                                               |               | 55<br>106077                                                                                                              | 90<br>85755                                                                                                               |               | 117<br>149170                                                                                                             | 28<br>45557                                                                                                               |               | 109<br>147109                                                                                                             | 17<br>23736                                                                                                       |               | Cases<br>Cohort size                                                                                                        |
| 0.875 (0.774-0.989)                                                                                                       | 0.63          | 0.843 (0.714-0.996)                                                                                                       | 0.949 (0.840-1.073)                                                                                                       | 0.619         | 0.916 (0.821-1.023)                                                                                                       | 0.864 (0.693-1.078)                                                                                                       | 0.925         | 0.910 (0.804-1.029)                                                                                                       | 0.752 (0.555-1.020)                                                                                               | 0.659         | Mean Systolic Blood Pressure continuous (per 10mmHg increase)                                                               |
| 0.829 (0.659-1.043)                                                                                                       | 0.692         | 0.814 (0.612-1.082)                                                                                                       | 0.927 (0.747-1.151)                                                                                                       | 0.664         | 0.889 (0.734-1.075)                                                                                                       | 0.776 (0.517-1.165)                                                                                                       | 0.765         | 0.923 (0.750-1.136)                                                                                                       | 0.646 (0.363-1.149)                                                                                               | 0.41          | Mean Diastolic Blood Pressure continuous (per 10mmHg increase)                                                              |
| 0.821 (0.677-0.994)                                                                                                       | 0.616         | 0.791 (0.616-1.015)                                                                                                       | 0.926 (0.769-1.115)                                                                                                       | 0.615         | 0.882 (0.747-1.041)                                                                                                       | 0.788 (0.559-1.112)                                                                                                       | 0.906         | 0.894 (0.744-1.074)                                                                                                       | 0.619 (0.374-1.024)                                                                                               | 0.45          | Mean Blood Pressure (1/3SBP+2/3DBP) continuous (per 10mmHg increase)                                                        |
| 1 (referent)<br>1.17 (0.61-2.22)<br>0.49 (0.22-1.08)<br>0.50 (0.25-1.02)<br>0.69 (0.31-1.58)<br>0.46 (0.10-2.04)<br>0.026 | 0.598         | 1 (referent)<br>0.89 (0.42-1.87)<br>1.02 (0.47-2.20)<br>0.26 (0.09-0.76)<br>0.46 (0.14-1.54)<br>0.39 (0.05-3.14)<br>0.029 | 1 (referent)<br>1.02 (0.58-1.80)<br>0.56 (0.26-1.20)<br>0.79 (0.41-1.53)<br>1.14 (0.49-2.65)<br>0.46 (0.06-3.50)<br>0.464 | 0.505         | 1 (referent)<br>1.09 (0.66-1.78)<br>0.83 (0.46-1.49)<br>0.53 (0.27-1.01)<br>1.01 (0.48-2.13)<br>0.30 (0.04-2.24)<br>0.112 | 1 (referent)<br>0.46 (0.14-1.45)<br>0.58 (0.18-1.85)<br>0.50 (0.16-1.54)<br>0.25 (0.03-2.12)<br>0.54 (0.06-5.18)<br>0.213 | 0.957         | 1 (referent)<br>0.97 (0.60-1.59)<br>0.70 (0.38-1.30)<br>0.41 (0.19-0.85)<br>0.80 (0.32-2.01)<br>1.13 (0.26-4.91)<br>0.079 | single case in referent<br>-<br>-<br>-<br>-<br>-<br>-                                                             | -             | Systolic Blood Pressure (mmHg) ESH classification<br>< 120<br>120-129<br>130-139<br>140-159<br>160-179<br>>= 180<br>p-trend |
| 1 (referent)<br>0.65 (0.35-1.21)<br>0.58 (0.28-1.22)<br>0.67 (0.35-1.29)<br>0.76 (0.27-2.18)<br>no cases<br>0.123         | 0.893         | 1 (referent)<br>0.78 (0.38-1.61)<br>0.91 (0.41-2.00)<br>0.51 (0.20-1.29)<br>0.74 (0.17-3.24)<br>no cases<br>0.179         | 1 (referent)<br>0.71 (0.39-1.29)<br>1.01 (0.53-1.93)<br>0.71 (0.35-1.44)<br>0.88 (0.27-2.89)<br>no cases<br>0.369         | 0.855         | 1 (referent)<br>0.69 (0.41-1.17)<br>0.94 (0.53-1.66)<br>0.73 (0.40-1.33)<br>0.62 (0.19-2.00)<br>no cases<br>0.178         | 1 (referent)<br>0.84 (0.31-2.29)<br>1.12 (0.37-3.34)<br>0.27 (0.05-1.37)<br>0.87 (0.15-4.96)<br>no cases<br>0.26          | 0.758         | 1 (referent)<br>0.73 (0.43-1.24)<br>1.12 (0.63-2.01)<br>0.58 (0.27-1.25)<br>1.45 (0.52-4.09)<br>no cases<br>0.486         | 1 (referent)<br>0.38 (0.07-2.16)<br>0.65 (0.15-2.88)<br>0.45 (0.11-1.87)<br>0.27 (0.03-2.75)<br>no cases<br>0.215 | 0.491         | Diastolic Blood Pressure (mmHg) ESH classification<br>< 80<br>80-84<br>85-89<br>90-99<br>100-109<br>>= 110<br>p-trend       |
| 1 (referent)<br>0.82 (0.45-1.50)<br>0.51 (0.25-1.03)<br>0.65 (0.30-1.43)<br>0.111                                         | 0.9           | 1 (referent)<br>0.95 (0.49-1.82)<br>0.26 (0.09-0.75)<br>0.44 (0.15-1.34)<br>0.021                                         | 1 (referent)<br>0.83 (0.49-1.40)<br>0.81 (0.42-1.57)<br>1.01 (0.45-2.29)<br>0.793                                         | 0.312         | 1 (referent)<br>0.98 (0.63-1.54)<br>0.54 (0.28-1.03)<br>0.86 (0.42-1.79)<br>0.238                                         | 1 (referent)<br>0.51 (0.19-1.32)<br>0.50 (0.16-1.53)<br>0.33 (0.06-1.74)<br>0.151                                         | 0.713         | 1 (referent)<br>0.87 (0.55-1.35)<br>0.41 (0.20-0.87)<br>0.88 (0.39-2.01)<br>0.137                                         | single case in referent<br>-<br>-<br>-<br>-                                                                       | -             | Systolic Blood Pressure (mmHg) ASH classification<br>< 120<br>120-139<br>140-159<br>>= 160<br>p-trend                       |
| 1 (referent)<br>0.62 (0.37-1.05)<br>0.67 (0.35-1.29)<br>0.62 (0.22-1.77)<br>0.138                                         | 0.863         | 1 (referent)<br>0.83 (0.45-1.53)<br>0.51 (0.20-1.29)<br>0.60 (0.14-2.61)<br>0.16                                          | 1 (referent)<br>0.82 (0.50-1.33)<br>0.71 (0.35-1.44)<br>0.73 (0.22-2.40)<br>0.279                                         | 0.888         | 1 (referent)<br>0.79 (0.51-1.21)<br>0.72 (0.39-1.33)<br>0.50 (0.15-1.63)<br>0.115                                         | 1 (referent)<br>0.94 (0.40-2.19)<br>0.27 (0.05-1.36)<br>0.72 (0.13-4.03)<br>0.247                                         | 0.668         | 1 (referent)<br>0.86 (0.56-1.33)<br>0.58 (0.27-1.24)<br>1.19 (0.42-3.35)<br>0.36                                          | 1 (referent)<br>0.52 (0.14-1.95)<br>0.44 (0.11-1.84)<br>0.22 (0.02-2.21)<br>0.166                                 | 0.447         | Diastolic Blood Pressure (mmHg) ASH classification<br>< 80<br>80-89<br>90-99<br>>= 100<br>p-trend                           |
| 1 (referent)<br>0.81 (0.43-1.53)<br>0.55 (0.28-1.06)<br>0.51 (0.27-1.00)<br>0.029                                         | 0.558         | 1 (referent)<br>0.81 (0.39-1.70)<br>0.81 (0.38-1.73)<br>0.35 (0.14-0.89)<br>0.042                                         | 1 (referent)<br>0.95 (0.55-1.64)<br>0.70 (0.37-1.33)<br>0.81 (0.42-1.55)<br>0.375                                         | 0.591         | 1 (referent)<br>0.91 (0.56-1.49)<br>0.75 (0.43-1.29)<br>0.69 (0.38-1.24)<br>0.165                                         | 1 (referent)<br>0.73 (0.26-2.06)<br>0.74 (0.26-2.11)<br>0.25 (0.06-1.01)<br>0.068                                         | 0.742         | 1 (referent)<br>0.79 (0.48-1.30)<br>0.85 (0.49-1.44)<br>0.57 (0.29-1.12)<br>0.141                                         | two cases in referent<br>-<br>-<br>-<br>-                                                                         | -             | Mean BP (mmHg) (1/3SBP+2/3DBP) Cohort-specific quartiles<br>50.0-88.3<br>88.5-96.6<br>96.8-105.5<br>105.6-216.6<br>p-trend  |
| 1 (referent)<br>0.76 (0.48-1.21)                                                                                          | 0.403         | 1 (referent)<br>0.50 (0.27-0.93)                                                                                          | 1 (referent)<br>0.89 (0.56-1.41)                                                                                          | 0.352         | 1 (referent)<br>0.68 (0.45-1.04)                                                                                          | 1 (referent)<br>0.78 (0.34-1.78)                                                                                          | 0.728         | -<br>1 (referent)                                                                                                         | -<br>1.33 (0.69-2.57)                                                                                             |               | Hypertension (SBP >= 140 mmHg, or DBP >= 90 mmHg, or self-reported)<br>Normotensive<br>Hypertensive                         |

| <b>Cervix AC</b>                                                                     |              |              |                     |                      |  | <b>Excluding first<br/>2 years of follow-up<br/>HR (adjusted)</b> |
|--------------------------------------------------------------------------------------|--------------|--------------|---------------------|----------------------|--|-------------------------------------------------------------------|
|                                                                                      | <b>Cases</b> | <b>Total</b> | <b>HR (crude)</b>   | <b>HR (adjusted)</b> |  |                                                                   |
| <b>Cases</b>                                                                         |              |              | 37                  | 37                   |  | 31                                                                |
| <b>Total</b>                                                                         |              |              | 194727              | 194727               |  | 191551                                                            |
| <b>Mean Systolic Blood Pressure<br/>continuous (per 10mmHg increase)</b>             | 37           | 307318       | 0.968 (0.798-1.174) | 0.962 (0.789-1.171)  |  | 1.003 (0.805-1.251)                                               |
| <b>Mean Diastolic Blood Pressure<br/>continuous (per 10mmHg increase)</b>            | 37           | 307318       | 0.850 (0.606-1.192) | 0.838 (0.592-1.187)  |  | 0.778 (0.525-1.152)                                               |
| <b>Mean Blood Pressure (1/3SBP+2/3DBP)<br/>continuous (per 10mmHg increase)</b>      | 37           | 307318       | 0.900 (0.672-1.205) | 0.889 (0.659-1.201)  |  | 0.883 (0.628-1.242)                                               |
| <b>Hypertension (SBP &gt;= 140 mmHg,<br/>or DBP &gt;= 90 mmHg, or self-reported)</b> |              |              |                     |                      |  |                                                                   |
| <b>Normotensive</b>                                                                  | 23           | 174179       | 1 (referent)        | 1 (referent)         |  | 1 (referent)                                                      |
| <b>Hypertensive</b>                                                                  | 14           | 133139       | 1.17 (0.57-2.40)    | 1.23 (0.58-2.60)     |  | 1.40 (0.62-3.16)                                                  |

| <b>Cervix Other</b>                                                                  |              |              |                     |                      |  | <b>Excluding first<br/>2 years of follow-up<br/>HR (adjusted)</b> |
|--------------------------------------------------------------------------------------|--------------|--------------|---------------------|----------------------|--|-------------------------------------------------------------------|
|                                                                                      | <b>Cases</b> | <b>Total</b> | <b>HR (crude)</b>   | <b>HR (adjusted)</b> |  |                                                                   |
| <b>Cases</b>                                                                         |              |              | 41                  | 41                   |  | 36                                                                |
| <b>Total</b>                                                                         |              |              | 194727              | 194727               |  | 191551                                                            |
| <b>Mean Systolic Blood Pressure<br/>continuous (per 10mmHg increase)</b>             | 41           | 307318       | 1.278 (1.106-1.478) | 1.276 (1.098-1.483)  |  | 1.270 (1.081-1.491)                                               |
| <b>Mean Diastolic Blood Pressure<br/>continuous (per 10mmHg increase)</b>            | 41           | 307318       | 1.541 (1.187-2.001) | 1.534 (1.169-2.012)  |  | 1.541 (1.155-2.056)                                               |
| <b>Mean Blood Pressure (1/3SBP+2/3DBP)<br/>continuous (per 10mmHg increase)</b>      | 41           | 307318       | 1.489 (1.193-1.859) | 1.489 (1.183-1.874)  |  | 1.486 (1.163-1.899)                                               |
| <b>Hypertension (SBP &gt;= 140 mmHg,<br/>or DBP &gt;= 90 mmHg, or self-reported)</b> |              |              |                     |                      |  |                                                                   |
| <b>Normotensive</b>                                                                  | 19           | 174179       | 1 (referent)        | 1 (referent)         |  | 1 (referent)                                                      |
| <b>Hypertensive</b>                                                                  | 22           | 133139       | 1.88 (0.97-3.65)    | 1.82 (0.92-3.63)     |  | 1.62 (0.78-3.40)                                                  |

| Anogenital (not cervix)                                              |        | Excluding first 2 years of follow-up |                     |                     | Men                 | Women               | Sex                 | BMI <= 25 mg/m <sup>2</sup> | BMI > 25 mg/m <sup>2</sup> | BMI                 | Age <= 53 yrs |                     |
|----------------------------------------------------------------------|--------|--------------------------------------|---------------------|---------------------|---------------------|---------------------|---------------------|-----------------------------|----------------------------|---------------------|---------------|---------------------|
| Cases                                                                | Cohort | HR (crude)                           | HR (adjusted)       | HR (adjusted)       | HR (adjusted)       | HR (adjusted)       | p-interaction       | HR (adjusted)               | HR (adjusted)              | p-interaction       | HR (adjusted) |                     |
| Cases                                                                |        | 244                                  | 244                 | 216                 | 65                  | 179                 |                     | 95                          | 149                        |                     | 81            |                     |
| Cohort size                                                          |        | 307318                               | 307318              | 301857              | 112591              | 194727              |                     | 146326                      | 160992                     |                     | 153303        |                     |
| Mean Systolic Blood Pressure continuous (per 10mmHg increase)        | 244    | 307318                               | 0.990 (0.924-1.061) | 0.984 (0.916-1.056) | 0.975 (0.903-1.052) | 1.070 (0.934-1.225) | 0.957 (0.880-1.041) | 0.066                       | 0.941 (0.834-1.061)        | 1.028 (0.942-1.122) | 0.183         | 1.071 (0.937-1.225) |
| Mean Diastolic Blood Pressure continuous (per 10mmHg increase)       | 244    | 307318                               | 0.981 (0.867-1.109) | 0.974 (0.857-1.108) | 0.978 (0.853-1.121) | 0.987 (0.772-1.262) | 0.967 (0.831-1.124) | 0.507                       | 0.876 (0.708-1.084)        | 1.075 (0.918-1.259) | 0.083         | 1.235 (0.994-1.536) |
| Mean Blood Pressure (1/3SBP+2/3DBP) continuous (per 10mmHg increase) | 244    | 307318                               | 0.983 (0.885-1.092) | 0.975 (0.873-1.088) | 0.969 (0.863-1.090) | 1.047 (0.850-1.288) | 0.950 (0.835-1.081) | 0.186                       | 0.894 (0.745-1.074)        | 1.058 (0.925-1.211) | 0.098         | 1.170 (0.966-1.417) |
| Systolic Blood Pressure (mmHg) ESH classification                    |        |                                      |                     |                     |                     |                     |                     |                             |                            |                     |               |                     |
| < 120                                                                | 54     | 86141                                | 1 (referent)        |                             | 1 (referent)               | 1 (referent)        |               | 1 (referent)        |
| 120-129                                                              | 41     | 66446                                | 0.77 (0.51-1.16)    | 0.77 (0.51-1.17)    | 0.89 (0.57-1.38)    | 0.93 (0.35-2.46)    | 0.77 (0.49-1.23)    |                             | 0.57 (0.31-1.05)           | 1.13 (0.62-2.08)    |               | 0.51 (0.26-1.01)    |
| 130-139                                                              | 50     | 57482                                | 0.95 (0.64-1.42)    | 0.95 (0.63-1.42)    | 1.00 (0.65-1.55)    | 0.95 (0.37-2.46)    | 1.02 (0.65-1.60)    |                             | 0.84 (0.47-1.52)           | 1.26 (0.70-2.28)    |               | 0.91 (0.48-1.71)    |
| 140-159                                                              | 68     | 68235                                | 0.92 (0.63-1.35)    | 0.91 (0.62-1.35)    | 0.99 (0.65-1.51)    | 1.09 (0.45-2.67)    | 0.91 (0.58-1.43)    | 0.055                       | 0.75 (0.41-1.37)           | 1.29 (0.73-2.28)    | 0.162         | 0.63 (0.30-1.32)    |
| 160-179                                                              | 21     | 22656                                | 0.78 (0.46-1.32)    | 0.75 (0.44-1.29)    | 0.80 (0.45-1.43)    | 1.25 (0.44-3.58)    | 0.62 (0.31-1.21)    |                             | 0.73 (0.29-1.83)           | 1.01 (0.49-2.06)    |               | 1.88 (0.81-4.39)    |
| >= 180                                                               | 10     | 6358                                 | 1.31 (0.65-2.64)    | 1.26 (0.62-2.55)    | 1.17 (0.53-2.59)    | 2.40 (0.71-8.11)    | 0.88 (0.34-2.30)    |                             | 0.47 (0.06-3.58)           | 2.11 (0.92-4.86)    |               | 3.22 (0.93-11.16)   |
| p-trend                                                              |        |                                      | 0.947               | 0.948               | 0.961               | 0.229               | 0.493               |                             | 0.401                      | 0.314               |               | 0.369               |
| Diastolic Blood Pressure (mmHg) ESH classification                   |        |                                      |                     |                     |                     |                     |                     |                             |                            |                     |               |                     |
| < 80                                                                 | 93     | 132590                               | 1 (referent)        |                             | 1 (referent)               | 1 (referent)        |               | 1 (referent)        |
| 80-84                                                                | 56     | 64872                                | 1.05 (0.75-1.47)    | 1.05 (0.75-1.47)    | 1.14 (0.80-1.63)    | 0.81 (0.40-1.67)    | 1.15 (0.78-1.69)    |                             | 0.79 (0.45-1.36)           | 1.34 (0.86-2.10)    |               | 1.01 (0.54-1.89)    |
| 85-89                                                                | 30     | 41500                                | 0.81 (0.53-1.23)    | 0.80 (0.52-1.22)    | 0.85 (0.55-1.32)    | 0.64 (0.27-1.47)    | 0.87 (0.54-1.42)    |                             | 0.56 (0.25-1.24)           | 1.06 (0.63-1.77)    |               | 0.98 (0.46-2.09)    |
| 90-99                                                                | 50     | 51196                                | 1.04 (0.73-1.48)    | 1.02 (0.71-1.47)    | 0.97 (0.66-1.44)    | 0.97 (0.50-1.89)    | 1.02 (0.66-1.59)    | 0.664                       | 1.12 (0.63-2.01)           | 1.14 (0.71-1.83)    | 0.236         | 1.64 (0.87-3.07)    |
| 100-109                                                              | 11     | 13896                                | 0.81 (0.43-1.52)    | 0.80 (0.42-1.52)    | 0.82 (0.42-1.62)    | 0.45 (0.13-1.57)    | 1.02 (0.49-2.16)    |                             | no cases                   | 1.27 (0.64-2.51)    |               | 1.10 (0.33-3.72)    |
| >= 110                                                               | 4      | 3264                                 | 1.38 (0.50-3.77)    | 1.38 (0.50-3.81)    | 1.55 (0.56-4.29)    | 1.72 (0.49-6.04)    | 0.66 (0.09-4.78)    |                             | 2.02 (0.28-14.79)          | 1.56 (0.48-5.08)    |               | 6.86 (2.30-20.47)   |
| p-trend                                                              |        |                                      | 0.805               | 0.758               | 0.701               | 0.801               | 0.818               |                             | 0.43                       | 0.559               |               | 0.035               |
| Systolic Blood Pressure (mmHg) ASH classification                    |        |                                      |                     |                     |                     |                     |                     |                             |                            |                     |               |                     |
| < 120                                                                | 54     | 86141                                | 1 (referent)        |                             | 1 (referent)               | 1 (referent)        |               | 1 (referent)        |
| 120-139                                                              | 91     | 123928                               | 0.86 (0.61-1.21)    | 0.86 (0.60-1.21)    | 0.94 (0.64-1.38)    | 0.94 (0.39-2.23)    | 0.89 (0.60-1.31)    |                             | 0.68 (0.42-1.12)           | 1.20 (0.70-2.06)    |               | 0.68 (0.40-1.15)    |
| 140-159                                                              | 68     | 68235                                | 0.92 (0.63-1.34)    | 0.90 (0.61-1.34)    | 0.99 (0.65-1.50)    | 1.09 (0.44-2.66)    | 0.90 (0.58-1.41)    | 0.045                       | 0.74 (0.41-1.35)           | 1.29 (0.73-2.27)    | 0.158         | 0.61 (0.29-1.29)    |
| >= 160                                                               | 31     | 29014                                | 0.89 (0.55-1.43)    | 0.85 (0.52-1.39)    | 0.88 (0.52-1.48)    | 1.50 (0.57-3.98)    | 0.67 (0.36-1.22)    |                             | 0.67 (0.28-1.60)           | 1.24 (0.65-2.37)    |               | 2.06 (0.96-4.44)    |
| p-trend                                                              |        |                                      | 0.733               | 0.631               | 0.747               | 0.273               | 0.267               |                             | 0.264                      | 0.506               |               | 0.564               |
| Diastolic Blood Pressure (mmHg) ASH classification                   |        |                                      |                     |                     |                     |                     |                     |                             |                            |                     |               |                     |
| < 80                                                                 | 93     | 132590                               | 1 (referent)        |                             | 1 (referent)               | 1 (referent)        |               | 1 (referent)        |
| 80-89                                                                | 86     | 106372                               | 0.95 (0.71-1.28)    | 0.95 (0.70-1.28)    | 1.02 (0.74-1.41)    | 0.74 (0.39-1.39)    | 1.04 (0.74-1.47)    |                             | 0.71 (0.43-1.15)           | 1.22 (0.81-1.83)    |               | 1.00 (0.58-1.71)    |
| 90-99                                                                | 50     | 51196                                | 1.04 (0.73-1.48)    | 1.03 (0.71-1.48)    | 0.98 (0.66-1.45)    | 0.97 (0.50-1.90)    | 1.03 (0.66-1.59)    | 0.833                       | 1.12 (0.63-2.01)           | 1.15 (0.72-1.84)    | 0.184         | 1.63 (0.87-3.05)    |
| >= 100                                                               | 15     | 17160                                | 0.91 (0.52-1.58)    | 0.90 (0.51-1.59)    | 0.95 (0.53-1.72)    | 0.72 (0.28-1.87)    | 0.97 (0.48-1.97)    |                             | 0.26 (0.04-1.91)           | 1.33 (0.71-2.47)    |               | 2.10 (0.88-5.00)    |
| p-trend                                                              |        |                                      | 0.928               | 0.891               | 0.866               | 0.73                | 0.965               |                             | 0.393                      | 0.412               |               | 0.057               |
| Mean BP (mmHg) (1/3SBP+2/3DBP) Cohort-specific quartiles             |        |                                      |                     |                     |                     |                     |                     |                             |                            |                     |               |                     |
| 50.0-88.3                                                            | 53     | 76991                                | 1 (referent)        |                             | 1 (referent)               | 1 (referent)        |               | 1 (referent)        |
| 88.5-96.6                                                            | 44     | 77727                                | 0.65 (0.43-0.98)    | 0.65 (0.43-0.98)    | 0.71 (0.46-1.10)    | 0.75 (0.29-1.95)    | 0.64 (0.41-1.01)    |                             | 0.63 (0.36-1.12)           | 0.71 (0.39-1.28)    |               | 0.66 (0.35-1.26)    |
| 96.8-105.5                                                           | 72     | 76327                                | 0.94 (0.65-1.36)    | 0.93 (0.64-1.35)    | 1.01 (0.68-1.51)    | 0.89 (0.36-2.19)    | 0.98 (0.64-1.49)    | 0.269                       | 0.91 (0.52-1.57)           | 1.06 (0.62-1.81)    | 0.3           | 0.84 (0.44-1.62)    |
| 105.6-216.6                                                          | 75     | 76273                                | 0.85 (0.58-1.23)    | 0.83 (0.56-1.22)    | 0.79 (0.52-1.21)    | 1.01 (0.42-2.43)    | 0.78 (0.50-1.23)    |                             | 0.77 (0.42-1.43)           | 0.99 (0.57-1.69)    |               | 1.37 (0.72-2.60)    |
| p-trend                                                              |        |                                      | 0.917               | 0.826               | 0.633               | 0.657               | 0.665               |                             | 0.598                      | 0.533               |               | 0.312               |
| Hypertension (SBP >= 140 mmHg, or DBP >= 90 mmHg, or self-reported)  |        |                                      |                     |                     |                     |                     |                     |                             |                            |                     |               |                     |
| Normotensive                                                         | 113    | 174179                               | 1 (referent)        |                             | 1 (referent)               | 1 (referent)        |               | 1 (referent)        |
| Hypertensive                                                         | 131    | 133139                               | 1.15 (0.88-1.49)    | 1.12 (0.85-1.47)    | 1.11 (0.83-1.49)    | 1.21 (0.71-2.07)    | 1.09 (0.79-1.50)    | 0.561                       | 0.87 (0.55-1.36)           | 1.41 (0.99-2.01)    | 0.066         | 1.43 (0.89-2.30)    |



| Age > 53 yrs                                                                                                              | Age           | Never smokers                                                                                                             | Ever smokers                                                                                                              | Smoking       | Alcohol <= 12g                                                                                                            | Alcohol > 12g                                                                                                            | Alcohol       | No antihypertensive treatment                                                                                              | Antihypertensive treatment                                                                                        | Treatment     | Anogenital (not cervix)                                                                                                       |
|---------------------------------------------------------------------------------------------------------------------------|---------------|---------------------------------------------------------------------------------------------------------------------------|---------------------------------------------------------------------------------------------------------------------------|---------------|---------------------------------------------------------------------------------------------------------------------------|--------------------------------------------------------------------------------------------------------------------------|---------------|----------------------------------------------------------------------------------------------------------------------------|-------------------------------------------------------------------------------------------------------------------|---------------|-------------------------------------------------------------------------------------------------------------------------------|
| HR (adjusted)                                                                                                             | p-interaction | HR (adjusted)                                                                                                             | HR (adjusted)                                                                                                             | p-interaction | HR (adjusted)                                                                                                             | HR (adjusted)                                                                                                            | p-interaction | HR (adjusted)                                                                                                              | HR (adjusted)                                                                                                     | p-interaction |                                                                                                                               |
| 163<br>154015                                                                                                             |               | 106<br>141931                                                                                                             | 136<br>160623                                                                                                             |               | 166<br>205214                                                                                                             | 78<br>102104                                                                                                             |               | 162<br>227336                                                                                                              | 35<br>37017                                                                                                       |               | Cases<br>Cohort size                                                                                                          |
| 0.954 (0.877-1.038)                                                                                                       | 0.127         | 1.042 (0.937-1.158)                                                                                                       | 0.932 (0.845-1.027)                                                                                                       | 0.205         | 0.973 (0.891-1.063)                                                                                                       | 1.002 (0.887-1.133)                                                                                                      | 0.247         | 1.047 (0.956-1.146)                                                                                                        | 1.003 (0.838-1.200)                                                                                               | 0.553         | Mean Systolic Blood Pressure continuous (per 10mmHg increase)                                                                 |
| 0.866 (0.739-1.015)                                                                                                       | 0.009         | 1.125 (0.933-1.357)                                                                                                       | 0.859 (0.721-1.024)                                                                                                       | 0.05          | 0.912 (0.778-1.069)                                                                                                       | 1.109 (0.890-1.381)                                                                                                      | 0.09          | 1.119 (0.951-1.316)                                                                                                        | 1.014 (0.719-1.431)                                                                                               | 0.697         | Mean Diastolic Blood Pressure continuous (per 10mmHg increase)                                                                |
| 0.899 (0.787-1.027)                                                                                                       | 0.024         | 1.094 (0.931-1.287)                                                                                                       | 0.879 (0.757-1.021)                                                                                                       | 0.081         | 0.936 (0.817-1.072)                                                                                                       | 1.052 (0.873-1.268)                                                                                                      | 0.122         | 1.096 (0.953-1.260)                                                                                                        | 1.009 (0.753-1.353)                                                                                               | 0.598         | Mean Blood Pressure (1/3SBP+2/3DBP) continuous (per 10mmHg increase)                                                          |
| 1 (referent)<br>1.00 (0.58-1.74)<br>1.03 (0.60-1.76)<br>1.06 (0.64-1.76)<br>0.59 (0.29-1.19)<br>1.08 (0.45-2.59)<br>0.516 | 0.214         | 1 (referent)<br>1.24 (0.62-2.48)<br>1.69 (0.86-3.32)<br>1.83 (0.95-3.53)<br>1.30 (0.55-3.08)<br>1.54 (0.42-5.58)<br>0.188 | 1 (referent)<br>0.56 (0.33-0.96)<br>0.63 (0.37-1.06)<br>0.56 (0.33-0.93)<br>0.52 (0.25-1.06)<br>1.08 (0.46-2.54)<br>0.169 | 0.102         | 1 (referent)<br>0.69 (0.42-1.15)<br>1.18 (0.74-1.88)<br>0.97 (0.60-1.55)<br>0.57 (0.27-1.19)<br>1.22 (0.50-3.02)<br>0.877 | 1 (referent)<br>0.94 (0.45-1.95)<br>0.53 (0.23-1.22)<br>0.80 (0.39-1.63)<br>1.03 (0.44-2.39)<br>1.19 (0.37-3.82)<br>0.97 | 0.343         | 1 (referent)<br>0.69 (0.42-1.15)<br>1.00 (0.62-1.63)<br>1.25 (0.79-1.98)<br>0.96 (0.47-1.96)<br>1.84 (0.70-4.88)<br>0.162  | two cases in referent<br>-<br>-<br>-<br>-<br>-<br>-                                                               | -             | ESH classification<br>< 120<br>120-129<br>130-139<br>140-159<br>160-179<br>≥ 180<br>p-trend                                   |
| 1 (referent)<br>1.05 (0.70-1.57)<br>0.73 (0.44-1.20)<br>0.83 (0.53-1.29)<br>0.71 (0.33-1.50)<br>no cases<br>0.083         | 0.006         | 1 (referent)<br>1.23 (0.72-2.08)<br>1.19 (0.66-2.17)<br>1.30 (0.74-2.25)<br>0.80 (0.28-2.29)<br>1.89 (0.45-8.04)<br>0.545 | 1 (referent)<br>0.90 (0.57-1.41)<br>0.55 (0.30-1.02)<br>0.85 (0.52-1.38)<br>0.77 (0.34-1.74)<br>1.01 (0.24-4.19)<br>0.307 | 0.267         | 1 (referent)<br>1.14 (0.77-1.70)<br>0.88 (0.53-1.43)<br>0.88 (0.55-1.40)<br>0.58 (0.23-1.46)<br>1.11 (0.27-4.60)<br>0.286 | 1 (referent)<br>0.83 (0.43-1.61)<br>0.65 (0.29-1.45)<br>1.29 (0.71-2.34)<br>1.14 (0.45-2.86)<br>1.92 (0.44-8.33)<br>0.35 | 0.095         | 1 (referent)<br>1.31 (0.88-1.96)<br>1.02 (0.61-1.71)<br>1.33 (0.84-2.12)<br>1.26 (0.53-2.96)<br>3.48 (1.07-11.32)<br>0.161 | 1 (referent)<br>0.99 (0.28-3.53)<br>1.03 (0.30-3.54)<br>1.28 (0.43-3.79)<br>1.13 (0.30-4.20)<br>no cases<br>0.955 | 0.651         | ESH classification<br>< 80<br>80-84<br>85-89<br>90-99<br>100-109<br>≥ 110<br>p-trend                                          |
| 1 (referent)<br>1.01 (0.62-1.65)<br>1.06 (0.64-1.76)<br>0.70 (0.37-1.31)<br>0.351                                         | 0.257         | 1 (referent)<br>1.45 (0.79-2.67)<br>1.80 (0.93-3.47)<br>1.32 (0.59-2.97)<br>0.324                                         | 1 (referent)<br>0.59 (0.38-0.92)<br>0.55 (0.33-0.92)<br>0.64 (0.34-1.19)<br>0.1                                           | 0.112         | 1 (referent)<br>0.91 (0.60-1.38)<br>0.94 (0.59-1.51)<br>0.69 (0.36-1.29)<br>0.356                                         | 1 (referent)<br>0.73 (0.37-1.43)<br>0.81 (0.40-1.65)<br>1.08 (0.49-2.40)<br>0.687                                        | 0.113         | 1 (referent)<br>0.83 (0.55-1.26)<br>1.23 (0.78-1.95)<br>1.11 (0.59-2.08)<br>0.349                                          | two cases in referent<br>-<br>-<br>-<br>-                                                                         | -             | ESH classification<br>< 120<br>120-139<br>140-159<br>≥ 160<br>p-trend                                                         |
| 1 (referent)<br>0.91 (0.63-1.31)<br>0.83 (0.54-1.30)<br>0.59 (0.28-1.24)<br>0.161                                         | 0.016         | 1 (referent)<br>1.21 (0.76-1.94)<br>1.30 (0.74-2.25)<br>0.99 (0.40-2.41)<br>0.587                                         | 1 (referent)<br>0.76 (0.50-1.13)<br>0.85 (0.52-1.39)<br>0.82 (0.40-1.70)<br>0.444                                         | 0.362         | 1 (referent)<br>1.04 (0.73-1.48)<br>0.88 (0.55-1.40)<br>0.68 (0.30-1.50)<br>0.366                                         | 1 (referent)<br>0.75 (0.42-1.35)<br>1.29 (0.71-2.35)<br>1.27 (0.55-2.92)<br>0.327                                        | 0.105         | 1 (referent)<br>1.20 (0.84-1.73)<br>1.34 (0.84-2.12)<br>1.60 (0.78-3.30)<br>0.111                                          | 1 (referent)<br>1.02 (0.34-3.04)<br>1.28 (0.44-3.79)<br>0.92 (0.25-3.45)<br>0.901                                 | 0.609         | ESH classification<br>< 80<br>80-89<br>90-99<br>≥ 100<br>p-trend                                                              |
| 1 (referent)<br>0.63 (0.37-1.07)<br>0.93 (0.58-1.48)<br>0.67 (0.41-1.09)<br>0.335                                         | 0.14          | 1 (referent)<br>0.68 (0.34-1.36)<br>1.35 (0.74-2.46)<br>1.17 (0.62-2.19)<br>0.235                                         | 1 (referent)<br>0.63 (0.38-1.05)<br>0.68 (0.42-1.13)<br>0.63 (0.38-1.06)<br>0.15                                          | 0.089         | 1 (referent)<br>0.65 (0.40-1.05)<br>0.98 (0.63-1.53)<br>0.76 (0.47-1.23)<br>0.622                                         | 1 (referent)<br>0.65 (0.30-1.42)<br>0.81 (0.39-1.66)<br>0.94 (0.46-1.89)<br>0.763                                        | 0.263         | 1 (referent)<br>0.62 (0.38-1.03)<br>1.30 (0.83-2.02)<br>1.14 (0.70-1.85)<br>0.138                                          | single case in referent<br>-<br>-<br>-<br>-                                                                       | -             | Mean BP (mmHg) (1/3SBP+2/3DBP)<br>Cohort-specific quartiles<br>50.0-88.3<br>88.5-96.6<br>96.8-105.5<br>105.6-216.6<br>p-trend |
| 1 (referent)<br>0.99 (0.71-1.37)                                                                                          | 0.158         | 1 (referent)<br>1.28 (0.84-1.96)                                                                                          | 1 (referent)<br>1.01 (0.70-1.45)                                                                                          | 0.284         | 1 (referent)<br>1.11 (0.80-1.55)                                                                                          | 1 (referent)<br>1.11 (0.68-1.79)                                                                                         | 0.596         | -<br>1 (referent)                                                                                                          | -<br>0.85 (0.56-1.30)                                                                                             | -             | Hypertension (SBP ≥ 140 mmHg,<br>or DBP ≥ 90 mmHg, or self-reported)<br>Normotensive<br>Hypertensive                          |

| Anogenital (not cervix) SCC                                                      |        | Excluding first 2 years of follow-up |                     |                     | Men                 | Women               | Sex                 | BMI <= 25 mg/m <sup>2</sup> | BMI > 25 mg/m <sup>2</sup> | BMI                 | Age <= 53 yrs |                     |
|----------------------------------------------------------------------------------|--------|--------------------------------------|---------------------|---------------------|---------------------|---------------------|---------------------|-----------------------------|----------------------------|---------------------|---------------|---------------------|
| Cases                                                                            | Cohort | HR (crude)                           | HR (adjusted)       | HR (adjusted)       | HR (adjusted)       | HR (adjusted)       | p-interaction       | HR (adjusted)               | HR (adjusted)              | p-interaction       | HR (adjusted) |                     |
| Cases                                                                            |        | 173                                  | 173                 | 151                 | 53                  | 120                 |                     | 70                          | 103                        |                     | 64            |                     |
| Cohort size                                                                      |        | 307318                               | 307318              | 301857              | 112591              | 194727              |                     | 146326                      | 160992                     |                     | 153303        |                     |
| <b>Mean Systolic Blood Pressure continuous (per 10mmHg increase)</b>             | 173    | 307318                               | 1.029 (0.949-1.116) | 1.019 (0.937-1.108) | 1.000 (0.913-1.095) | 1.106 (0.955-1.281) | 0.987 (0.891-1.093) | 0.072                       | 0.980 (0.852-1.128)        | 1.067 (0.962-1.183) | 0.183         | 1.068 (0.916-1.244) |
| <b>Mean Diastolic Blood Pressure continuous (per 10mmHg increase)</b>            | 173    | 307318                               | 1.016 (0.879-1.175) | 0.998 (0.857-1.161) | 0.986 (0.837-1.161) | 1.035 (0.791-1.353) | 0.979 (0.814-1.177) | 0.415                       | 0.938 (0.733-1.201)        | 1.088 (0.899-1.316) | 0.268         | 1.224 (0.958-1.565) |
| <b>Mean Blood Pressure (1/3SBP+2/3DBP) continuous (per 10mmHg increase)</b>      | 173    | 307318                               | 1.030 (0.910-1.166) | 1.014 (0.891-1.154) | 0.993 (0.864-1.142) | 1.098 (0.876-1.377) | 0.980 (0.837-1.146) | 0.167                       | 0.954 (0.772-1.180)        | 1.096 (0.934-1.287) | 0.189         | 1.162 (0.935-1.445) |
| <b>Systolic Blood Pressure (mmHg) ESH classification</b>                         |        |                                      |                     |                     |                     |                     |                     |                             |                            |                     |               |                     |
| < 120                                                                            | 39     | 86141                                | 1 (referent)        |                             | 1 (referent)               | 1 (referent)        |               | 1 (referent)        |
| 120-129                                                                          | 25     | 66446                                | 0.67 (0.40-1.11)    | 0.67 (0.40-1.11)    | 0.76 (0.44-1.31)    | 0.47 (0.15-1.51)    | 0.77 (0.44-1.36)    |                             | 0.60 (0.29-1.23)           | 0.84 (0.39-1.79)    |               | 0.54 (0.26-1.15)    |
| 130-139                                                                          | 37     | 57482                                | 1.03 (0.65-1.64)    | 1.01 (0.63-1.62)    | 1.03 (0.61-1.72)    | 0.83 (0.31-2.23)    | 1.16 (0.67-1.98)    |                             | 1.05 (0.54-2.03)           | 1.20 (0.59-2.42)    |               | 0.92 (0.45-1.87)    |
| 140-159                                                                          | 47     | 68235                                | 0.95 (0.61-1.50)    | 0.93 (0.58-1.48)    | 0.97 (0.58-1.61)    | 0.96 (0.38-2.42)    | 0.96 (0.55-1.66)    | 0.055                       | 0.76 (0.36-1.58)           | 1.26 (0.64-2.48)    | 0.134         | 0.57 (0.24-1.35)    |
| 160-179                                                                          | 17     | 22656                                | 0.97 (0.53-1.77)    | 0.92 (0.50-1.71)    | 0.93 (0.48-1.82)    | 1.32 (0.45-3.83)    | 0.72 (0.31-1.64)    |                             | 1.03 (0.37-2.87)           | 1.12 (0.49-2.57)    |               | 2.08 (0.82-5.26)    |
| >= 180                                                                           | 8      | 6358                                 | 1.64 (0.74-3.63)    | 1.52 (0.68-3.40)    | 1.31 (0.52-3.28)    | 2.03 (0.55-7.54)    | 1.23 (0.41-3.65)    |                             | 0.78 (0.10-6.06)           | 2.31 (0.88-6.04)    |               | 2.79 (0.62-12.60)   |
| p-trend                                                                          |        |                                      | 0.36                | 0.488               | 0.653               | 0.123               | 0.976               |                             | 0.86                       | 0.13                |               | 0.477               |
| <b>Diastolic Blood Pressure (mmHg) ESH classification</b>                        |        |                                      |                     |                     |                     |                     |                     |                             |                            |                     |               |                     |
| < 80                                                                             | 65     | 132590                               | 1 (referent)        |                             | 1 (referent)               | 1 (referent)        |               | 1 (referent)        |
| 80-84                                                                            | 37     | 64872                                | 1.03 (0.68-1.55)    | 1.01 (0.67-1.53)    | 1.05 (0.68-1.62)    | 0.58 (0.25-1.36)    | 1.25 (0.78-2.01)    |                             | 1.04 (0.56-1.92)           | 1.04 (0.59-1.81)    |               | 0.97 (0.49-1.96)    |
| 85-89                                                                            | 20     | 41500                                | 0.80 (0.48-1.33)    | 0.79 (0.47-1.31)    | 0.83 (0.49-1.42)    | 0.46 (0.17-1.26)    | 0.99 (0.55-1.80)    |                             | 0.75 (0.31-1.81)           | 0.87 (0.46-1.66)    |               | 0.67 (0.25-1.78)    |
| 90-99                                                                            | 40     | 51196                                | 1.25 (0.83-1.87)    | 1.20 (0.79-1.83)    | 1.05 (0.66-1.67)    | 1.05 (0.52-2.12)    | 1.22 (0.72-2.08)    | 0.741                       | 1.46 (0.75-2.85)           | 1.21 (0.70-2.07)    | 0.633         | 1.59 (0.79-3.19)    |
| 100-109                                                                          | 7      | 13896                                | 0.77 (0.35-1.70)    | 0.74 (0.33-1.63)    | 0.69 (0.29-1.63)    | 0.33 (0.07-1.50)    | 1.07 (0.42-2.75)    |                             | no cases                   | 1.05 (0.45-2.44)    |               | 0.87 (0.20-3.82)    |
| >= 110                                                                           | 4      | 3264                                 | 2.10 (0.76-5.80)    | 1.97 (0.71-5.52)    | 2.15 (0.76-6.06)    | 1.96 (0.55-7.01)    | 1.10 (0.15-8.06)    |                             | 3.25 (0.44-24.21)          | 2.04 (0.61-6.76)    |               | 8.05 (2.61-24.78)   |
| p-trend                                                                          |        |                                      | 0.526               | 0.674               | 0.984               | 0.944               | 0.653               |                             | 0.781                      | 0.433               |               | 0.068               |
| <b>Systolic Blood Pressure (mmHg) ASH classification</b>                         |        |                                      |                     |                     |                     |                     |                     |                             |                            |                     |               |                     |
| < 120                                                                            | 39     | 86141                                | 1 (referent)        |                             | 1 (referent)               | 1 (referent)        |               | 1 (referent)        |
| 120-139                                                                          | 62     | 123928                               | 0.84 (0.56-1.27)    | 0.83 (0.54-1.26)    | 0.89 (0.56-1.39)    | 0.66 (0.26-1.64)    | 0.94 (0.59-1.51)    |                             | 0.79 (0.45-1.39)           | 1.02 (0.53-1.95)    |               | 0.70 (0.38-1.27)    |
| 140-159                                                                          | 47     | 68235                                | 0.94 (0.60-1.48)    | 0.91 (0.57-1.45)    | 0.95 (0.57-1.58)    | 0.94 (0.37-2.37)    | 0.94 (0.54-1.63)    | 0.05                        | 0.74 (0.36-1.55)           | 1.25 (0.64-2.45)    | 0.14          | 0.56 (0.24-1.32)    |
| >= 160                                                                           | 25     | 29014                                | 1.10 (0.64-1.89)    | 1.03 (0.59-1.79)    | 1.00 (0.54-1.84)    | 1.44 (0.53-3.93)    | 0.81 (0.39-1.67)    |                             | 0.96 (0.37-2.52)           | 1.36 (0.64-2.89)    |               | 2.14 (0.91-5.07)    |
| p-trend                                                                          |        |                                      | 0.675               | 0.847               | 0.916               | 0.183               | 0.616               |                             | 0.618                      | 0.274               |               | 0.615               |
| <b>Diastolic Blood Pressure (mmHg) ASH classification</b>                        |        |                                      |                     |                     |                     |                     |                     |                             |                            |                     |               |                     |
| < 80                                                                             | 65     | 132590                               | 1 (referent)        |                             | 1 (referent)               | 1 (referent)        |               | 1 (referent)        |
| 80-89                                                                            | 57     | 106372                               | 0.93 (0.65-1.34)    | 0.92 (0.64-1.33)    | 0.96 (0.65-1.41)    | 0.53 (0.25-1.10)    | 1.15 (0.75-1.76)    |                             | 0.94 (0.54-1.63)           | 0.97 (0.59-1.59)    |               | 0.86 (0.46-1.61)    |
| 90-99                                                                            | 40     | 51196                                | 1.25 (0.83-1.88)    | 1.21 (0.79-1.84)    | 1.05 (0.66-1.67)    | 1.05 (0.52-2.14)    | 1.22 (0.72-2.08)    | 0.939                       | 1.47 (0.75-2.85)           | 1.21 (0.70-2.08)    | 0.613         | 1.58 (0.79-3.17)    |
| >= 100                                                                           | 11     | 17160                                | 1.00 (0.52-1.92)    | 0.96 (0.49-1.85)    | 0.95 (0.47-1.91)    | 0.67 (0.24-1.90)    | 1.08 (0.45-2.58)    |                             | 0.43 (0.06-3.18)           | 1.24 (0.59-2.58)    |               | 2.14 (0.83-5.52)    |
| p-trend                                                                          |        |                                      | 0.507               | 0.648               | 0.968               | 0.899               | 0.528               |                             | 0.8                        | 0.414               |               | 0.091               |
| <b>Mean BP (mmHg) (1/3SBP+2/3DBP) Cohort-specific quartiles</b>                  |        |                                      |                     |                     |                     |                     |                     |                             |                            |                     |               |                     |
| 50.0-88.3                                                                        | 37     | 76991                                | 1 (referent)        |                             | 1 (referent)               | 1 (referent)        |               | 1 (referent)        |
| 88.5-96.6                                                                        | 29     | 77727                                | 0.64 (0.39-1.05)    | 0.64 (0.39-1.04)    | 0.68 (0.40-1.16)    | 0.65 (0.22-1.90)    | 0.64 (0.37-1.14)    |                             | 0.77 (0.39-1.53)           | 0.51 (0.25-1.06)    |               | 0.81 (0.41-1.63)    |
| 96.8-105.5                                                                       | 49     | 76327                                | 0.99 (0.63-1.54)    | 0.97 (0.61-1.52)    | 1.02 (0.63-1.67)    | 0.80 (0.29-2.17)    | 1.08 (0.65-1.81)    | 0.268                       | 1.31 (0.69-2.48)           | 0.82 (0.43-1.55)    | 0.697         | 0.78 (0.36-1.68)    |
| 105.6-216.6                                                                      | 58     | 76273                                | 1.03 (0.66-1.60)    | 0.99 (0.62-1.57)    | 0.89 (0.53-1.47)    | 1.13 (0.43-2.93)    | 0.93 (0.54-1.61)    |                             | 1.08 (0.52-2.24)           | 0.96 (0.52-1.77)    |               | 1.38 (0.66-2.89)    |
| p-trend                                                                          |        |                                      | 0.385               | 0.515               | 0.903               | 0.375               | 0.745               |                             | 0.511                      | 0.417               |               | 0.45                |
| <b>Hypertension (SBP &gt;= 140 mmHg, or DBP &gt;= 90 mmHg, or self-reported)</b> |        |                                      |                     |                     |                     |                     |                     |                             |                            |                     |               |                     |
| Normotensive                                                                     | 80     | 174179                               | 1 (referent)        |                             | 1 (referent)               | 1 (referent)        |               | 1 (referent)        |
| Hypertensive                                                                     | 93     | 133139                               | 1.22 (0.89-1.68)    | 1.17 (0.85-1.62)    | 1.13 (0.80-1.60)    | 1.32 (0.73-2.41)    | 1.12 (0.76-1.65)    | 0.458                       | 0.98 (0.58-1.65)           | 1.47 (0.95-2.26)    | 0.132         | 1.36 (0.80-2.32)    |

| Age > 53 yrs                                                                                                              | Age           | Never smokers                                                                                                              | Ever smokers                                                                                                              | Smoking       | Alcohol <= 12g                                                                                                            | Alcohol > 12g                                                                                                              | Alcohol       | No antihypertensive treatment                                                                                              | Antihypertensive treatment                            | Treatment     | Anogenital (not cervix) SCC                                                                                                |
|---------------------------------------------------------------------------------------------------------------------------|---------------|----------------------------------------------------------------------------------------------------------------------------|---------------------------------------------------------------------------------------------------------------------------|---------------|---------------------------------------------------------------------------------------------------------------------------|----------------------------------------------------------------------------------------------------------------------------|---------------|----------------------------------------------------------------------------------------------------------------------------|-------------------------------------------------------|---------------|----------------------------------------------------------------------------------------------------------------------------|
| HR (adjusted)                                                                                                             | p-interaction | HR (adjusted)                                                                                                              | HR (adjusted)                                                                                                             | p-interaction | HR (adjusted)                                                                                                             | HR (adjusted)                                                                                                              | p-interaction | HR (adjusted)                                                                                                              | HR (adjusted)                                         | p-interaction |                                                                                                                            |
| 109<br>154015                                                                                                             |               | 66<br>141931                                                                                                               | 106<br>160623                                                                                                             |               | 115<br>205214                                                                                                             | 58<br>102104                                                                                                               |               | 115<br>227336                                                                                                              | 23<br>37017                                           |               | Cases<br>Cohort size                                                                                                       |
| 1.001 (0.905-1.106)                                                                                                       | 0.419         | 1.070 (0.937-1.222)                                                                                                        | 0.977 (0.876-1.091)                                                                                                       | 0.133         | 1.000 (0.900-1.111)                                                                                                       | 1.052 (0.916-1.209)                                                                                                        | 0.35          | 1.093 (0.982-1.215)                                                                                                        | 1.041 (0.837-1.295)                                   | 0.976         | Mean Systolic Blood Pressure continuous (per 10mmHg increase)                                                              |
| 0.886 (0.731-1.075)                                                                                                       | 0.035         | 1.161 (0.914-1.474)                                                                                                        | 0.890 (0.730-1.085)                                                                                                       | 0.039         | 0.897 (0.741-1.086)                                                                                                       | 1.205 (0.939-1.546)                                                                                                        | 0.073         | 1.164 (0.960-1.410)                                                                                                        | 0.941 (0.610-1.453)                                   | 0.599         | Mean Diastolic Blood Pressure continuous (per 10mmHg increase)                                                             |
| 0.946 (0.806-1.111)                                                                                                       | 0.113         | 1.135 (0.925-1.392)                                                                                                        | 0.929 (0.784-1.099)                                                                                                       | 0.054         | 0.948 (0.806-1.116)                                                                                                       | 1.138 (0.921-1.405)                                                                                                        | 0.138         | 1.156 (0.980-1.362)                                                                                                        | 1.008 (0.701-1.450)                                   | 0.778         | Mean Blood Pressure (1/3SBP+2/3DBP) continuous (per 10mmHg increase)                                                       |
| 1 (referent)<br>0.80 (0.39-1.64)<br>1.12 (0.58-2.16)<br>1.12 (0.60-2.09)<br>0.71 (0.31-1.63)<br>1.44 (0.54-3.84)<br>0.723 | 0.591         | 1 (referent)<br>1.51 (0.57-4.04)<br>2.48 (0.98-6.27)<br>2.60 (1.04-6.50)<br>1.91 (0.62-5.94)<br>2.13 (0.41-11.02)<br>0.102 | 1 (referent)<br>0.48 (0.26-0.90)<br>0.66 (0.37-1.18)<br>0.54 (0.30-0.98)<br>0.68 (0.31-1.46)<br>1.38 (0.54-3.50)<br>0.566 | 0.04          | 1 (referent)<br>0.75 (0.40-1.40)<br>1.47 (0.84-2.57)<br>1.04 (0.57-1.87)<br>0.87 (0.38-1.97)<br>1.36 (0.45-4.14)<br>0.648 | 1 (referent)<br>0.51 (0.21-1.24)<br>0.41 (0.16-1.05)<br>0.72 (0.33-1.55)<br>0.90 (0.35-2.31)<br>1.42 (0.43-4.68)<br>0.61   | 0.575         | 1 (referent)<br>0.69 (0.38-1.26)<br>1.05 (0.59-1.87)<br>1.41 (0.81-2.45)<br>1.33 (0.60-2.97)<br>2.53 (0.84-7.62)<br>0.046  | single case in referent<br>-<br>-<br>-<br>-<br>-<br>- | -             | ESH classification<br>< 120<br>120-129<br>130-139<br>140-159<br>160-179<br>>= 180<br>p-trend                               |
| 1 (referent)<br>1.03 (0.62-1.72)<br>0.83 (0.45-1.52)<br>1.04 (0.62-1.76)<br>0.69 (0.27-1.78)<br>no cases<br>0.439         | 0.046         | 1 (referent)<br>1.60 (0.81-3.15)<br>1.56 (0.73-3.33)<br>1.47 (0.71-3.05)<br>0.70 (0.16-3.10)<br>3.20 (0.72-14.26)<br>0.428 | 1 (referent)<br>0.73 (0.42-1.25)<br>0.44 (0.21-0.95)<br>1.07 (0.64-1.80)<br>0.74 (0.28-1.90)<br>1.40 (0.33-5.90)<br>0.832 | 0.226         | 1 (referent)<br>1.16 (0.72-1.87)<br>0.89 (0.49-1.61)<br>0.95 (0.55-1.65)<br>0.33 (0.08-1.38)<br>1.54 (0.37-6.49)<br>0.401 | 1 (referent)<br>0.68 (0.29-1.56)<br>0.59 (0.22-1.61)<br>1.67 (0.85-3.29)<br>1.43 (0.51-3.99)<br>2.82 (0.63-12.60)<br>0.069 | 0.064         | 1 (referent)<br>1.16 (0.71-1.91)<br>0.98 (0.52-1.84)<br>1.66 (0.98-2.80)<br>1.29 (0.45-3.67)<br>5.15 (1.55-17.12)<br>0.039 | three cases in referent<br>-<br>-<br>-<br>-<br>-<br>- | -             | Diastolic Blood Pressure (mmHg) ESH classification<br>< 80<br>80-84<br>85-89<br>90-99<br>100-109<br>>= 110<br>p-trend      |
| 1 (referent)<br>0.96 (0.53-1.76)<br>1.11 (0.60-2.07)<br>0.87 (0.41-1.82)<br>0.915                                         | 0.526         | 1 (referent)<br>1.96 (0.83-4.65)<br>2.53 (1.01-6.31)<br>1.89 (0.64-5.57)<br>0.203                                          | 1 (referent)<br>0.56 (0.34-0.93)<br>0.54 (0.30-0.96)<br>0.82 (0.42-1.60)<br>0.364                                         | 0.048         | 1 (referent)<br>1.07 (0.64-1.77)<br>1.00 (0.55-1.80)<br>0.93 (0.44-1.95)<br>0.817                                         | 1 (referent)<br>0.46 (0.21-0.98)<br>0.72 (0.33-1.55)<br>1.02 (0.43-2.43)<br>0.559                                          | 0.345         | 1 (referent)<br>0.85 (0.51-1.39)<br>1.39 (0.80-2.40)<br>1.52 (0.74-3.12)<br>0.105                                          | single case in referent<br>-<br>-<br>-<br>-           | -             | Systolic Blood Pressure (mmHg) ASH classification<br>< 120<br>120-139<br>140-159<br>>= 160<br>p-trend                      |
| 1 (referent)<br>0.94 (0.60-1.49)<br>1.05 (0.62-1.77)<br>0.57 (0.22-1.47)<br>0.528                                         | 0.07          | 1 (referent)<br>1.58 (0.86-2.92)<br>1.47 (0.71-3.05)<br>1.15 (0.37-3.52)<br>0.486                                          | 1 (referent)<br>0.61 (0.38-0.99)<br>1.08 (0.64-1.80)<br>0.86 (0.37-1.96)<br>0.906                                         | 0.28          | 1 (referent)<br>1.05 (0.68-1.61)<br>0.96 (0.55-1.65)<br>0.54 (0.19-1.55)<br>0.434                                         | 1 (referent)<br>0.64 (0.31-1.32)<br>1.67 (0.85-3.28)<br>1.66 (0.67-4.15)<br>0.077                                          | 0.075         | 1 (referent)<br>1.10 (0.70-1.71)<br>1.66 (0.98-2.80)<br>1.90 (0.83-4.35)<br>0.038                                          | three cases in referent<br>-<br>-<br>-<br>-           | -             | Diastolic Blood Pressure (mmHg) ASH classification<br>< 80<br>80-89<br>90-99<br>>= 100<br>p-trend                          |
| 1 (referent)<br>0.50 (0.25-1.02)<br>0.99 (0.55-1.77)<br>0.82 (0.45-1.49)<br>0.809                                         | 0.546         | 1 (referent)<br>0.63 (0.23-1.72)<br>2.12 (0.94-4.75)<br>1.50 (0.63-3.53)<br>0.097                                          | 1 (referent)<br>0.62 (0.35-1.10)<br>0.55 (0.30-0.99)<br>0.79 (0.45-1.38)<br>0.494                                         | 0.03          | 1 (referent)<br>0.64 (0.36-1.16)<br>1.11 (0.65-1.89)<br>0.88 (0.49-1.56)<br>0.869                                         | 1 (referent)<br>0.61 (0.24-1.52)<br>0.69 (0.29-1.63)<br>1.15 (0.51-2.55)<br>0.382                                          | 0.393         | 1 (referent)<br>0.65 (0.36-1.18)<br>1.39 (0.81-2.36)<br>1.43 (0.81-2.54)<br>0.047                                          | single case in referent<br>-<br>-<br>-<br>-           | -             | Mean BP (mmHg) (1/3SBP+2/3DBP) Cohort-specific quartiles<br>50.0-88.3<br>88.5-96.6<br>96.8-105.5<br>105.6-216.6<br>p-trend |
| 1 (referent)<br>1.07 (0.71-1.60)                                                                                          | 0.391         | 1 (referent)<br>1.36 (0.79-2.34)                                                                                           | 1 (referent)<br>1.07 (0.71-1.61)                                                                                          | 0.146         | 1 (referent)<br>1.12 (0.75-1.67)                                                                                          | 1 (referent)<br>1.26 (0.72-2.21)                                                                                           | 0.65          | -<br>1 (referent)                                                                                                          | -<br>0.81 (0.48-1.35)                                 | -             | Hypertension (SBP >= 140 mmHg, or DBP >= 90 mmHg, or self-reported)<br>Normotensive<br>Hypertensive                        |

| Skin SCC                                                             |        |            |                     |                     | Excluding first 2 years of follow-up | Men                 | Women               | Sex           | BMI <= 25 mg/m <sup>2</sup> | BMI > 25 mg/m <sup>2</sup> | BMI           | Age <= 53 yrs       |
|----------------------------------------------------------------------|--------|------------|---------------------|---------------------|--------------------------------------|---------------------|---------------------|---------------|-----------------------------|----------------------------|---------------|---------------------|
| Cases                                                                | Cohort | HR (crude) | HR (adjusted)       | HR (adjusted)       | HR (adjusted)                        | HR (adjusted)       | HR (adjusted)       | p-interaction | HR (adjusted)               | HR (adjusted)              | p-interaction | HR (adjusted)       |
| Cases                                                                |        | 1399       | 1399                | 1346                | 729                                  | 670                 |                     |               | 697                         | 702                        |               | 219                 |
| Cohort size                                                          |        | 307318     | 307318              | 301857              | 112591                               | 194727              |                     |               | 146326                      | 160992                     |               | 153303              |
| Mean Systolic Blood Pressure continuous (per 10mmHg increase)        | 1399   | 307318     | 1.000 (0.973-1.028) | 1.007 (0.979-1.037) | 1.003 (0.974-1.033)                  | 1.005 (0.965-1.046) | 1.012 (0.972-1.055) | 0.768         | 1.005 (0.965-1.046)         | 1.007 (0.967-1.048)        | 0.898         | 1.053 (0.971-1.142) |
| Mean Diastolic Blood Pressure continuous (per 10mmHg increase)       | 1399   | 307318     | 1.071 (1.019-1.126) | 1.070 (1.016-1.127) | 1.067 (1.011-1.125)                  | 1.038 (0.966-1.115) | 1.107 (1.027-1.194) | 0.318         | 1.036 (0.962-1.116)         | 1.092 (1.016-1.173)        | 0.215         | 1.160 (1.015-1.326) |
| Mean Blood Pressure (1/3SBP+2/3DBP) continuous (per 10mmHg increase) | 1399   | 307318     | 1.033 (0.990-1.078) | 1.039 (0.994-1.086) | 1.034 (0.988-1.081)                  | 1.022 (0.961-1.087) | 1.059 (0.994-1.129) | 0.713         | 1.021 (0.959-1.086)         | 1.049 (0.986-1.115)        | 0.438         | 1.119 (0.995-1.257) |
| Systolic Blood Pressure (mmHg) ESH classification                    |        |            |                     |                     |                                      |                     |                     |               |                             |                            |               |                     |
| < 120                                                                | 203    | 86141      | 1 (referent)        | 1 (referent)        | 1 (referent)                         | 1 (referent)        | 1 (referent)        |               | 1 (referent)                | 1 (referent)               |               | 1 (referent)        |
| 120-129                                                              | 249    | 66446      | 1.04 (0.86-1.25)    | 1.02 (0.85-1.23)    | 1.01 (0.84-1.23)                     | 1.05 (0.78-1.40)    | 1.03 (0.80-1.33)    |               | 1.05 (0.83-1.32)            | 0.99 (0.72-1.35)           |               | 1.35 (0.93-1.95)    |
| 130-139                                                              | 253    | 57482      | 0.95 (0.78-1.14)    | 0.94 (0.77-1.13)    | 0.93 (0.76-1.13)                     | 1.01 (0.76-1.34)    | 0.88 (0.68-1.15)    |               | 0.87 (0.68-1.12)            | 1.00 (0.74-1.36)           |               | 1.04 (0.68-1.59)    |
| 140-159                                                              | 437    | 68235      | 0.97 (0.82-1.16)    | 0.98 (0.82-1.17)    | 0.97 (0.81-1.16)                     | 1.02 (0.78-1.34)    | 0.97 (0.76-1.23)    | 0.645         | 0.94 (0.74-1.19)            | 1.02 (0.76-1.36)           | 0.747         | 1.31 (0.87-1.98)    |
| 160-179                                                              | 192    | 22656      | 0.99 (0.80-1.22)    | 1.02 (0.83-1.27)    | 0.96 (0.78-1.20)                     | 0.99 (0.72-1.35)    | 1.11 (0.83-1.48)    |               | 0.99 (0.74-1.34)            | 1.04 (0.76-1.44)           |               | 1.51 (0.81-2.83)    |
| >= 180                                                               | 65     | 6358       | 1.10 (0.82-1.47)    | 1.16 (0.86-1.55)    | 1.16 (0.86-1.56)                     | 1.26 (0.84-1.89)    | 1.09 (0.70-1.68)    |               | 1.34 (0.88-2.03)            | 1.03 (0.67-1.59)           |               | 1.82 (0.56-5.93)    |
| p-trend                                                              |        |            | 0.926               | 0.672               | 0.953                                | 0.72                | 0.733               |               | 0.955                       | 0.697                      |               | 0.202               |
| Diastolic Blood Pressure (mmHg) ESH classification                   |        |            |                     |                     |                                      |                     |                     |               |                             |                            |               |                     |
| < 80                                                                 | 473    | 132590     | 1 (referent)        | 1 (referent)        | 1 (referent)                         | 1 (referent)        | 1 (referent)        |               | 1 (referent)                | 1 (referent)               |               | 1 (referent)        |
| 80-84                                                                | 275    | 64872      | 0.94 (0.81-1.09)    | 0.94 (0.81-1.09)    | 0.92 (0.79-1.08)                     | 0.95 (0.77-1.17)    | 0.90 (0.73-1.13)    |               | 0.90 (0.73-1.11)            | 0.97 (0.78-1.22)           |               | 1.01 (0.69-1.47)    |
| 85-89                                                                | 215    | 41500      | 1.04 (0.88-1.22)    | 1.04 (0.89-1.23)    | 1.04 (0.88-1.22)                     | 0.92 (0.73-1.16)    | 1.18 (0.94-1.49)    |               | 1.04 (0.83-1.32)            | 1.04 (0.82-1.32)           |               | 1.38 (0.92-2.07)    |
| 90-99                                                                | 297    | 51196      | 1.03 (0.89-1.20)    | 1.03 (0.89-1.20)    | 0.99 (0.84-1.15)                     | 0.92 (0.75-1.14)    | 1.16 (0.93-1.45)    | 0.086         | 1.05 (0.85-1.31)            | 1.01 (0.81-1.25)           | 0.475         | 1.30 (0.86-1.95)    |
| 100-109                                                              | 116    | 13896      | 1.38 (1.12-1.70)    | 1.37 (1.11-1.69)    | 1.37 (1.11-1.70)                     | 1.19 (0.90-1.58)    | 1.64 (1.19-2.26)    |               | 1.14 (0.80-1.63)            | 1.47 (1.12-1.93)           |               | 2.35 (1.36-4.05)    |
| >= 110                                                               | 23     | 3264       | 1.29 (0.85-1.96)    | 1.26 (0.83-1.93)    | 1.24 (0.81-1.91)                     | 1.16 (0.69-1.94)    | 1.43 (0.67-3.05)    |               | 1.43 (0.71-2.90)            | 1.18 (0.69-2.00)           |               | 0.68 (0.09-4.96)    |
| p-trend                                                              |        |            | 0.016               | 0.021               | 0.053                                | 0.651               | 0.003               |               | 0.261                       | 0.061                      |               | 0.013               |
| Systolic Blood Pressure (mmHg) ASH classification                    |        |            |                     |                     |                                      |                     |                     |               |                             |                            |               |                     |
| < 120                                                                | 203    | 86141      | 1 (referent)        | 1 (referent)        | 1 (referent)                         | 1 (referent)        | 1 (referent)        |               | 1 (referent)                | 1 (referent)               |               | 1 (referent)        |
| 120-139                                                              | 502    | 123928     | 0.99 (0.84-1.17)    | 0.98 (0.83-1.16)    | 0.97 (0.82-1.15)                     | 1.03 (0.79-1.33)    | 0.96 (0.77-1.20)    |               | 0.96 (0.78-1.19)            | 1.00 (0.75-1.32)           |               | 1.22 (0.87-1.70)    |
| 140-159                                                              | 437    | 68235      | 0.98 (0.82-1.16)    | 0.99 (0.82-1.18)    | 0.97 (0.81-1.16)                     | 1.02 (0.78-1.34)    | 0.97 (0.76-1.24)    | 0.909         | 0.94 (0.75-1.19)            | 1.02 (0.76-1.36)           | 0.882         | 1.32 (0.87-1.99)    |
| >= 160                                                               | 257    | 29014      | 1.01 (0.83-1.24)    | 1.06 (0.86-1.29)    | 1.01 (0.82-1.24)                     | 1.05 (0.78-1.41)    | 1.11 (0.84-1.46)    |               | 1.07 (0.82-1.41)            | 1.04 (0.76-1.42)           |               | 1.58 (0.88-2.82)    |
| p-trend                                                              |        |            | 0.939               | 0.545               | 0.881                                | 0.803               | 0.469               |               | 0.765                       | 0.7                        |               | 0.09                |
| Diastolic Blood Pressure (mmHg) ASH classification                   |        |            |                     |                     |                                      |                     |                     |               |                             |                            |               |                     |
| < 80                                                                 | 473    | 132590     | 1 (referent)        | 1 (referent)        | 1 (referent)                         | 1 (referent)        | 1 (referent)        |               | 1 (referent)                | 1 (referent)               |               | 1 (referent)        |
| 80-89                                                                | 490    | 106372     | 0.98 (0.86-1.11)    | 0.98 (0.86-1.12)    | 0.97 (0.85-1.11)                     | 0.94 (0.78-1.13)    | 1.01 (0.84-1.21)    |               | 0.96 (0.80-1.14)            | 1.00 (0.83-1.22)           |               | 1.15 (0.84-1.58)    |
| 90-99                                                                | 297    | 51196      | 1.03 (0.89-1.20)    | 1.03 (0.88-1.20)    | 0.99 (0.84-1.15)                     | 0.92 (0.75-1.14)    | 1.16 (0.93-1.45)    | 0.159         | 1.05 (0.85-1.31)            | 1.01 (0.81-1.25)           | 0.313         | 1.29 (0.86-1.94)    |
| >= 100                                                               | 139    | 17160      | 1.37 (1.13-1.66)    | 1.35 (1.11-1.65)    | 1.35 (1.10-1.65)                     | 1.19 (0.91-1.54)    | 1.61 (1.19-2.18)    |               | 1.19 (0.86-1.64)            | 1.42 (1.10-1.83)           |               | 2.06 (1.21-3.51)    |
| p-trend                                                              |        |            | 0.018               | 0.025               | 0.061                                | 0.533               | 0.007               |               | 0.392                       | 0.044                      |               | 0.017               |
| Mean BP (mmHg) (1/3SBP+2/3DBP) Cohort-specific quartiles             |        |            |                     |                     |                                      |                     |                     |               |                             |                            |               |                     |
| 50.0-88.3                                                            | 204    | 76991      | 1 (referent)        | 1 (referent)        | 1 (referent)                         | 1 (referent)        | 1 (referent)        |               | 1 (referent)                | 1 (referent)               |               | 1 (referent)        |
| 88.5-96.6                                                            | 296    | 77727      | 1.01 (0.84-1.21)    | 1.00 (0.83-1.20)    | 1.01 (0.84-1.21)                     | 0.99 (0.76-1.31)    | 0.99 (0.78-1.27)    |               | 1.07 (0.85-1.33)            | 0.90 (0.66-1.24)           |               | 1.36 (0.93-2.00)    |
| 96.8-105.5                                                           | 360    | 76327      | 0.96 (0.80-1.14)    | 0.95 (0.79-1.13)    | 0.95 (0.80-1.14)                     | 0.89 (0.68-1.17)    | 1.00 (0.78-1.27)    | 0.372         | 0.85 (0.67-1.08)            | 1.03 (0.77-1.38)           | 0.307         | 1.29 (0.86-1.94)    |
| 105.6-216.6                                                          | 539    | 76273      | 1.06 (0.90-1.26)    | 1.07 (0.90-1.28)    | 1.05 (0.88-1.25)                     | 0.97 (0.75-1.26)    | 1.19 (0.94-1.51)    |               | 1.07 (0.85-1.34)            | 1.07 (0.81-1.42)           |               | 1.58 (1.03-2.42)    |
| p-trend                                                              |        |            | 0.448               | 0.352               | 0.577                                | 0.801               | 0.111               |               | 0.985                       | 0.245                      |               | 0.063               |
| Hypertension (SBP >= 140 mmHg, or DBP >= 90 mmHg, or self-reported)  |        |            |                     |                     |                                      |                     |                     |               |                             |                            |               |                     |
| Normotensive                                                         | 584    | 174179     | 1 (referent)        | 1 (referent)        | 1 (referent)                         | 1 (referent)        | 1 (referent)        |               | 1 (referent)                | 1 (referent)               |               | 1 (referent)        |
| Hypertensive                                                         | 815    | 133139     | 1.04 (0.93-1.16)    | 1.09 (0.97-1.22)    | 1.06 (0.95-1.19)                     | 1.03 (0.88-1.20)    | 1.16 (0.99-1.37)    | 0.558         | 1.03 (0.88-1.21)            | 1.13 (0.96-1.33)           | 0.406         | 1.45 (1.09-1.92)    |



| Melanoma (skin)                                                                  |        | Excluding first 2 years of follow-up |                     |                     | Men                 | Women               | Sex                 | BMI <= 25 mg/m <sup>2</sup> | BMI > 25 mg/m <sup>2</sup> | BMI                 | Age <= 53 yrs |                     |
|----------------------------------------------------------------------------------|--------|--------------------------------------|---------------------|---------------------|---------------------|---------------------|---------------------|-----------------------------|----------------------------|---------------------|---------------|---------------------|
| Cases                                                                            | Cohort | HR (crude)                           | HR (adjusted)       | HR (adjusted)       | HR (adjusted)       | HR (adjusted)       | p-interaction       | HR (adjusted)               | HR (adjusted)              | p-interaction       | HR (adjusted) |                     |
| Cases                                                                            |        | 1617                                 | 1617                | 1452                | 699                 | 918                 |                     | 775                         | 842                        |                     | 641           |                     |
| Cohort size                                                                      |        | 307318                               | 307318              | 301857              | 112591              | 194727              |                     | 146326                      | 160992                     |                     | 153303        |                     |
| <b>Mean Systolic Blood Pressure continuous (per 10mmHg increase)</b>             | 1617   | 307318                               | 1.010 (0.983-1.038) | 1.007 (0.979-1.036) | 0.998 (0.968-1.028) | 1.015 (0.972-1.060) | 1.005 (0.969-1.043) | 0.096                       | 0.988 (0.947-1.030)        | 1.023 (0.986-1.062) | 0.093         | 0.983 (0.933-1.035) |
| <b>Mean Diastolic Blood Pressure continuous (per 10mmHg increase)</b>            | 1617   | 307318                               | 1.018 (0.971-1.068) | 1.003 (0.954-1.055) | 1.002 (0.951-1.056) | 0.987 (0.914-1.065) | 1.016 (0.951-1.085) | 0.452                       | 0.985 (0.914-1.060)        | 1.019 (0.953-1.089) | 0.318         | 0.984 (0.906-1.068) |
| <b>Mean Blood Pressure (1/3SBP+2/3DBP) continuous (per 10mmHg increase)</b>      | 1617   | 307318                               | 1.017 (0.976-1.059) | 1.007 (0.965-1.051) | 0.999 (0.955-1.046) | 1.005 (0.940-1.073) | 1.012 (0.956-1.071) | 0.203                       | 0.983 (0.922-1.048)        | 1.027 (0.970-1.088) | 0.153         | 0.979 (0.910-1.054) |
| <b>Systolic Blood Pressure (mmHg) ESH classification</b>                         |        |                                      |                     |                     |                     |                     |                     |                             |                            |                     |               |                     |
| < 120                                                                            | 371    | 86141                                | 1 (referent)        |                             | 1 (referent)               | 1 (referent)        |               | 1 (referent)        |
| 120-129                                                                          | 311    | 66446                                | 0.95 (0.82-1.11)    | 0.93 (0.80-1.08)    | 0.94 (0.80-1.11)    | 0.94 (0.72-1.23)    | 0.95 (0.78-1.15)    |                             | 1.01 (0.82-1.23)           | 0.85 (0.66-1.08)    |               | 0.96 (0.78-1.19)    |
| 130-139                                                                          | 328    | 57482                                | 1.08 (0.92-1.26)    | 1.04 (0.89-1.22)    | 1.01 (0.85-1.19)    | 1.03 (0.80-1.35)    | 1.09 (0.89-1.33)    |                             | 1.10 (0.88-1.36)           | 0.99 (0.78-1.25)    |               | 1.08 (0.86-1.35)    |
| 140-159                                                                          | 406    | 68235                                | 0.99 (0.85-1.16)    | 0.96 (0.82-1.13)    | 0.93 (0.79-1.10)    | 1.01 (0.78-1.31)    | 0.93 (0.76-1.15)    | 0.144                       | 0.99 (0.79-1.23)           | 0.92 (0.73-1.16)    | 0.409         | 0.87 (0.67-1.12)    |
| 160-179                                                                          | 157    | 22656                                | 1.07 (0.87-1.30)    | 1.04 (0.85-1.28)    | 0.98 (0.79-1.22)    | 1.08 (0.78-1.48)    | 1.05 (0.79-1.38)    |                             | 1.07 (0.77-1.48)           | 1.00 (0.76-1.32)    |               | 0.80 (0.50-1.29)    |
| >= 180                                                                           | 44     | 6358                                 | 1.05 (0.76-1.45)    | 1.03 (0.75-1.43)    | 0.96 (0.68-1.36)    | 0.91 (0.55-1.50)    | 1.19 (0.77-1.84)    |                             | 0.79 (0.41-1.50)           | 1.10 (0.74-1.63)    |               | 1.12 (0.49-2.54)    |
| p-trend                                                                          |        |                                      | 0.505               | 0.688               | 0.683               | 0.694               | 0.757               |                             | 0.971                      | 0.602               |               | 0.441               |
| <b>Diastolic Blood Pressure (mmHg) ESH classification</b>                        |        |                                      |                     |                     |                     |                     |                     |                             |                            |                     |               |                     |
| < 80                                                                             | 627    | 132590                               | 1 (referent)        |                             | 1 (referent)               | 1 (referent)        |               | 1 (referent)        |
| 80-84                                                                            | 345    | 64872                                | 1.03 (0.90-1.18)    | 1.02 (0.89-1.16)    | 1.02 (0.89-1.18)    | 1.01 (0.82-1.25)    | 1.03 (0.87-1.23)    |                             | 0.99 (0.82-1.20)           | 1.05 (0.86-1.28)    |               | 0.95 (0.77-1.17)    |
| 85-89                                                                            | 242    | 41500                                | 1.09 (0.94-1.27)    | 1.06 (0.91-1.24)    | 1.04 (0.88-1.22)    | 1.13 (0.90-1.43)    | 1.00 (0.81-1.23)    |                             | 0.97 (0.77-1.23)           | 1.14 (0.93-1.40)    |               | 1.11 (0.87-1.41)    |
| 90-99                                                                            | 299    | 51196                                | 1.05 (0.91-1.21)    | 1.02 (0.88-1.18)    | 0.99 (0.85-1.16)    | 1.04 (0.83-1.29)    | 0.99 (0.81-1.22)    | 0.759                       | 1.05 (0.84-1.32)           | 1.01 (0.83-1.23)    | 0.856         | 0.95 (0.74-1.22)    |
| 100-109                                                                          | 91     | 13896                                | 1.15 (0.92-1.44)    | 1.10 (0.88-1.39)    | 1.13 (0.89-1.44)    | 0.87 (0.62-1.22)    | 1.43 (1.05-1.96)    |                             | 1.20 (0.82-1.77)           | 1.08 (0.81-1.43)    |               | 0.68 (0.40-1.13)    |
| >= 110                                                                           | 13     | 3264                                 | 0.75 (0.43-1.31)    | 0.72 (0.41-1.25)    | 0.74 (0.42-1.32)    | 0.66 (0.32-1.35)    | 0.79 (0.32-1.91)    |                             | 0.24 (0.03-1.74)           | 0.86 (0.48-1.54)    |               | 0.78 (0.29-2.10)    |
| p-trend                                                                          |        |                                      | 0.369               | 0.747               | 0.881               | 0.632               | 0.423               |                             | 0.789                      | 0.864               |               | 0.432               |
| <b>Systolic Blood Pressure (mmHg) ASH classification</b>                         |        |                                      |                     |                     |                     |                     |                     |                             |                            |                     |               |                     |
| < 120                                                                            | 371    | 86141                                | 1 (referent)        |                             | 1 (referent)               | 1 (referent)        |               | 1 (referent)        |
| 120-139                                                                          | 639    | 123928                               | 1.01 (0.89-1.16)    | 0.98 (0.86-1.12)    | 0.97 (0.85-1.12)    | 0.99 (0.78-1.25)    | 1.01 (0.85-1.19)    |                             | 1.04 (0.88-1.24)           | 0.92 (0.74-1.14)    |               | 1.01 (0.84-1.21)    |
| 140-159                                                                          | 406    | 68235                                | 0.99 (0.85-1.15)    | 0.96 (0.82-1.12)    | 0.93 (0.79-1.09)    | 1.01 (0.78-1.31)    | 0.93 (0.75-1.14)    | 0.124                       | 0.99 (0.79-1.23)           | 0.92 (0.73-1.15)    | 0.511         | 0.86 (0.67-1.12)    |
| >= 160                                                                           | 201    | 29014                                | 1.06 (0.88-1.28)    | 1.04 (0.85-1.25)    | 0.97 (0.79-1.19)    | 1.03 (0.76-1.40)    | 1.07 (0.83-1.38)    |                             | 1.01 (0.74-1.37)           | 1.02 (0.78-1.32)    |               | 0.85 (0.56-1.30)    |
| p-trend                                                                          |        |                                      | 0.73                | 0.94                | 0.559               | 0.763               | 0.985               |                             | 0.953                      | 0.846               |               | 0.263               |
| <b>Diastolic Blood Pressure (mmHg) ASH classification</b>                        |        |                                      |                     |                     |                     |                     |                     |                             |                            |                     |               |                     |
| < 80                                                                             | 627    | 132590                               | 1 (referent)        |                             | 1 (referent)               | 1 (referent)        |               | 1 (referent)        |
| 80-89                                                                            | 587    | 106372                               | 1.06 (0.94-1.19)    | 1.03 (0.92-1.16)    | 1.03 (0.91-1.17)    | 1.06 (0.88-1.28)    | 1.02 (0.88-1.19)    |                             | 0.98 (0.83-1.16)           | 1.09 (0.92-1.29)    |               | 1.01 (0.84-1.20)    |
| 90-99                                                                            | 299    | 51196                                | 1.05 (0.91-1.21)    | 1.02 (0.88-1.18)    | 0.99 (0.85-1.16)    | 1.03 (0.83-1.28)    | 0.99 (0.81-1.22)    | 0.958                       | 1.05 (0.84-1.32)           | 1.01 (0.83-1.23)    | 0.968         | 0.95 (0.74-1.22)    |
| >= 100                                                                           | 104    | 17160                                | 1.08 (0.87-1.33)    | 1.03 (0.83-1.28)    | 1.06 (0.85-1.33)    | 0.83 (0.60-1.14)    | 1.33 (0.99-1.79)    |                             | 1.06 (0.73-1.55)           | 1.03 (0.79-1.35)    |               | 0.69 (0.43-1.10)    |
| p-trend                                                                          |        |                                      | 0.366               | 0.74                | 0.792               | 0.47                | 0.287               |                             | 0.687                      | 0.938               |               | 0.257               |
| <b>Mean BP (mmHg) (1/3SBP+2/3DBP) Cohort-specific quartiles</b>                  |        |                                      |                     |                     |                     |                     |                     |                             |                            |                     |               |                     |
| 50.0-88.3                                                                        | 337    | 76991                                | 1 (referent)        |                             | 1 (referent)               | 1 (referent)        |               | 1 (referent)        |
| 88.5-96.6                                                                        | 382    | 77727                                | 1.00 (0.87-1.17)    | 0.98 (0.84-1.14)    | 0.99 (0.85-1.16)    | 1.00 (0.77-1.31)    | 0.99 (0.83-1.20)    |                             | 1.03 (0.85-1.24)           | 0.93 (0.73-1.20)    |               | 0.97 (0.79-1.20)    |
| 96.8-105.5                                                                       | 422    | 76327                                | 1.04 (0.90-1.21)    | 1.01 (0.87-1.17)    | 0.99 (0.84-1.17)    | 1.00 (0.77-1.30)    | 1.04 (0.86-1.26)    | 0.216                       | 1.00 (0.82-1.24)           | 1.01 (0.80-1.28)    | 0.306         | 1.05 (0.84-1.32)    |
| 105.6-216.6                                                                      | 476    | 76273                                | 1.06 (0.91-1.23)    | 1.02 (0.87-1.19)    | 0.98 (0.83-1.16)    | 1.02 (0.78-1.33)    | 1.03 (0.84-1.27)    |                             | 0.98 (0.78-1.23)           | 1.03 (0.82-1.31)    |               | 0.95 (0.73-1.23)    |
| p-trend                                                                          |        |                                      | 0.397               | 0.706               | 0.857               | 0.879               | 0.653               |                             | 0.853                      | 0.478               |               | 0.926               |
| <b>Hypertension (SBP &gt;= 140 mmHg, or DBP &gt;= 90 mmHg, or self-reported)</b> |        |                                      |                     |                     |                     |                     |                     |                             |                            |                     |               |                     |
| Normotensive                                                                     | 846    | 174179                               | 1 (referent)        |                             | 1 (referent)               | 1 (referent)        |               | 1 (referent)        |
| Hypertensive                                                                     | 771    | 133139                               | 1.01 (0.91-1.12)    | 1.00 (0.90-1.12)    | 0.97 (0.87-1.09)    | 0.98 (0.84-1.15)    | 1.02 (0.88-1.17)    | 0.461                       | 0.99 (0.84-1.15)           | 1.02 (0.88-1.17)    | 0.6           | 0.97 (0.81-1.16)    |



| Brain and CNS                                                                    |     | Cases  | Cohort              | HR (crude)          | HR (adjusted)       | Excluding first 2 years of follow-up HR (adjusted) | Men HR (adjusted)   | Women HR (adjusted) | Sex p-interaction   | BMI <= 25 mg/m <sup>2</sup> HR (adjusted) | BMI > 25 mg/m <sup>2</sup> HR (adjusted) | BMI p-interaction   | Age <= 53 yrs HR (adjusted) |
|----------------------------------------------------------------------------------|-----|--------|---------------------|---------------------|---------------------|----------------------------------------------------|---------------------|---------------------|---------------------|-------------------------------------------|------------------------------------------|---------------------|-----------------------------|
| Cases                                                                            |     |        |                     | 591                 | 591                 | 522                                                | 291                 | 300                 |                     | 246                                       | 345                                      |                     | 210                         |
| Cohort size                                                                      |     |        |                     | 307318              | 307318              | 301857                                             | 112591              | 194727              |                     | 146326                                    | 160992                                   |                     | 153303                      |
| <b>Mean Systolic Blood Pressure continuous (per 10mmHg increase)</b>             | 591 | 307318 | 1.020 (0.976-1.066) | 0.999 (0.954-1.047) | 1.006 (0.958-1.057) | 0.955 (0.890-1.024)                                | 1.040 (0.978-1.107) | 0.157               | 0.990 (0.918-1.066) | 1.005 (0.948-1.066)                       | 0.502                                    | 0.959 (0.875-1.050) |                             |
| <b>Mean Diastolic Blood Pressure continuous (per 10mmHg increase)</b>            | 591 | 307318 | 1.019 (0.943-1.102) | 0.973 (0.896-1.056) | 0.968 (0.886-1.056) | 0.909 (0.808-1.024)                                | 1.043 (0.931-1.169) | 0.188               | 1.080 (0.952-1.227) | 0.910 (0.818-1.011)                       | 0.14                                     | 0.957 (0.828-1.104) |                             |
| <b>Mean Blood Pressure (1/3SBP+2/3DBP) continuous (per 10mmHg increase)</b>      | 591 | 307318 | 1.024 (0.958-1.095) | 0.986 (0.919-1.058) | 0.989 (0.917-1.066) | 0.921 (0.829-1.022)                                | 1.053 (0.956-1.159) | 0.139               | 1.031 (0.924-1.152) | 0.958 (0.875-1.049)                       | 0.628                                    | 0.949 (0.834-1.080) |                             |
| <b>Systolic Blood Pressure (mmHg) ESH classification</b>                         |     |        |                     |                     |                     |                                                    |                     |                     |                     |                                           |                                          |                     |                             |
| < 120                                                                            | 126 | 86141  | 1 (referent)        | 1 (referent)        | 1 (referent)        | 1 (referent)                                       | 1 (referent)        |                     | 1 (referent)        | 1 (referent)                              |                                          | 1 (referent)        |                             |
| 120-129                                                                          | 112 | 66446  | 0.95 (0.73-1.23)    | 0.89 (0.69-1.16)    | 0.84 (0.64-1.12)    | 1.07 (0.72-1.57)                                   | 0.74 (0.51-1.07)    |                     | 0.77 (0.53-1.11)    | 1.06 (0.72-1.55)                          |                                          | 0.86 (0.59-1.26)    |                             |
| 130-139                                                                          | 126 | 57482  | 1.11 (0.86-1.43)    | 1.02 (0.78-1.32)    | 0.96 (0.73-1.26)    | 1.01 (0.68-1.50)                                   | 1.05 (0.74-1.49)    |                     | 1.01 (0.70-1.46)    | 1.08 (0.74-1.58)                          |                                          | 1.48 (1.02-2.13)    |                             |
| 140-159                                                                          | 159 | 68235  | 1.05 (0.82-1.34)    | 0.94 (0.72-1.21)    | 0.91 (0.70-1.20)    | 0.85 (0.57-1.26)                                   | 1.06 (0.75-1.49)    | 0.338               | 0.95 (0.65-1.38)    | 0.98 (0.68-1.42)                          | 0.489                                    | 0.73 (0.45-1.16)    |                             |
| 160-179                                                                          | 54  | 22656  | 1.05 (0.75-1.46)    | 0.93 (0.66-1.31)    | 0.94 (0.65-1.34)    | 0.92 (0.56-1.52)                                   | 0.95 (0.59-1.54)    |                     | 0.73 (0.39-1.38)    | 1.07 (0.69-1.66)                          |                                          | 0.33 (0.10-1.06)    |                             |
| >= 180                                                                           | 14  | 6358   | 0.98 (0.56-1.72)    | 0.85 (0.48-1.51)    | 0.96 (0.54-1.70)    | 0.68 (0.28-1.63)                                   | 1.07 (0.50-2.27)    |                     | 0.69 (0.21-2.23)    | 0.97 (0.49-1.90)                          |                                          | 0.99 (0.24-4.10)    |                             |
| p-trend                                                                          |     |        | 0.6                 | 0.692               | 0.864               | 0.23                                               | 0.511               |                     | 0.627               | 0.908                                     |                                          | 0.355               |                             |
| <b>Diastolic Blood Pressure (mmHg) ESH classification</b>                        |     |        |                     |                     |                     |                                                    |                     |                     |                     |                                           |                                          |                     |                             |
| < 80                                                                             | 213 | 132590 | 1 (referent)        | 1 (referent)        | 1 (referent)        | 1 (referent)                                       | 1 (referent)        |                     | 1 (referent)        | 1 (referent)                              |                                          | 1 (referent)        |                             |
| 80-84                                                                            | 134 | 64872  | 1.10 (0.89-1.38)    | 1.05 (0.84-1.31)    | 1.04 (0.82-1.31)    | 0.92 (0.66-1.27)                                   | 1.18 (0.87-1.60)    |                     | 1.23 (0.88-1.71)    | 0.90 (0.67-1.22)                          |                                          | 1.34 (0.94-1.92)    |                             |
| 85-89                                                                            | 98  | 41500  | 1.21 (0.95-1.54)    | 1.12 (0.88-1.44)    | 1.05 (0.80-1.37)    | 1.01 (0.71-1.43)                                   | 1.25 (0.88-1.76)    |                     | 1.37 (0.93-2.01)    | 0.96 (0.70-1.32)                          |                                          | 1.58 (1.06-2.35)    |                             |
| 90-99                                                                            | 113 | 51196  | 1.10 (0.87-1.39)    | 0.99 (0.78-1.26)    | 0.98 (0.76-1.26)    | 0.86 (0.62-1.21)                                   | 1.13 (0.80-1.60)    | 0.223               | 1.36 (0.93-1.99)    | 0.80 (0.59-1.09)                          | 0.16                                     | 0.98 (0.63-1.54)    |                             |
| 100-109                                                                          | 29  | 13896  | 1.02 (0.69-1.50)    | 0.89 (0.60-1.32)    | 0.96 (0.64-1.45)    | 0.74 (0.44-1.27)                                   | 1.09 (0.59-1.99)    |                     | 0.76 (0.31-1.88)    | 0.84 (0.54-1.32)                          |                                          | 0.77 (0.33-1.81)    |                             |
| >= 110                                                                           | 4   | 3264   | 0.60 (0.22-1.61)    | 0.51 (0.19-1.37)    | 0.43 (0.14-1.36)    | 0.33 (0.08-1.36)                                   | 0.85 (0.21-3.48)    |                     | 0.78 (0.11-5.63)    | 0.41 (0.13-1.30)                          |                                          | no cases            |                             |
| p-trend                                                                          |     |        | 0.677               | 0.514               | 0.523               | 0.135                                              | 0.483               |                     | 0.248               | 0.097                                     |                                          | 0.77                |                             |
| <b>Systolic Blood Pressure (mmHg) ASH classification</b>                         |     |        |                     |                     |                     |                                                    |                     |                     |                     |                                           |                                          |                     |                             |
| < 120                                                                            | 126 | 86141  | 1 (referent)        | 1 (referent)        | 1 (referent)        | 1 (referent)                                       | 1 (referent)        |                     | 1 (referent)        | 1 (referent)                              |                                          | 1 (referent)        |                             |
| 120-139                                                                          | 238 | 123928 | 1.03 (0.82-1.28)    | 0.95 (0.76-1.19)    | 0.90 (0.71-1.14)    | 1.04 (0.73-1.48)                                   | 0.88 (0.65-1.19)    |                     | 0.87 (0.64-1.19)    | 1.07 (0.76-1.51)                          |                                          | 1.11 (0.81-1.53)    |                             |
| 140-159                                                                          | 159 | 68235  | 1.04 (0.81-1.34)    | 0.93 (0.72-1.20)    | 0.91 (0.69-1.19)    | 0.85 (0.58-1.27)                                   | 1.05 (0.74-1.47)    | 0.554               | 0.94 (0.64-1.37)    | 0.98 (0.68-1.42)                          | 0.326                                    | 0.71 (0.44-1.13)    |                             |
| >= 160                                                                           | 68  | 29014  | 1.03 (0.75-1.40)    | 0.90 (0.66-1.25)    | 0.93 (0.67-1.31)    | 0.87 (0.54-1.41)                                   | 0.96 (0.62-1.50)    |                     | 0.71 (0.40-1.28)    | 1.05 (0.69-1.59)                          |                                          | 0.43 (0.17-1.10)    |                             |
| p-trend                                                                          |     |        | 0.808               | 0.52                | 0.693               | 0.285                                              | 0.847               |                     | 0.373               | 0.917                                     |                                          | 0.052               |                             |
| <b>Diastolic Blood Pressure (mmHg) ASH classification</b>                        |     |        |                     |                     |                     |                                                    |                     |                     |                     |                                           |                                          |                     |                             |
| < 80                                                                             | 213 | 132590 | 1 (referent)        | 1 (referent)        | 1 (referent)        | 1 (referent)                                       | 1 (referent)        |                     | 1 (referent)        | 1 (referent)                              |                                          | 1 (referent)        |                             |
| 80-89                                                                            | 232 | 106372 | 1.15 (0.95-1.39)    | 1.08 (0.89-1.31)    | 1.04 (0.85-1.28)    | 0.95 (0.72-1.26)                                   | 1.21 (0.93-1.57)    |                     | 1.28 (0.96-1.70)    | 0.93 (0.72-1.20)                          |                                          | 1.43 (1.04-1.96)    |                             |
| 90-99                                                                            | 113 | 51196  | 1.10 (0.87-1.39)    | 0.99 (0.78-1.26)    | 0.98 (0.76-1.26)    | 0.86 (0.61-1.20)                                   | 1.13 (0.80-1.60)    | 0.209               | 1.36 (0.93-1.99)    | 0.80 (0.59-1.09)                          | 0.189                                    | 0.98 (0.62-1.54)    |                             |
| >= 100                                                                           | 33  | 17160  | 0.94 (0.65-1.36)    | 0.81 (0.56-1.19)    | 0.86 (0.58-1.27)    | 0.66 (0.39-1.09)                                   | 1.05 (0.59-1.84)    |                     | 0.76 (0.33-1.75)    | 0.75 (0.49-1.16)                          |                                          | 0.62 (0.27-1.46)    |                             |
| p-trend                                                                          |     |        | 0.742               | 0.461               | 0.565               | 0.109                                              | 0.493               |                     | 0.298               | 0.092                                     |                                          | 0.701               |                             |
| <b>Mean BP (mmHg) (1/3SBP+2/3DBP) Cohort-specific quartiles</b>                  |     |        |                     |                     |                     |                                                    |                     |                     |                     |                                           |                                          |                     |                             |
| 50.0-88.3                                                                        | 119 | 76991  | 1 (referent)        | 1 (referent)        | 1 (referent)        | 1 (referent)                                       | 1 (referent)        |                     | 1 (referent)        | 1 (referent)                              |                                          | 1 (referent)        |                             |
| 88.5-96.6                                                                        | 119 | 77727  | 0.82 (0.64-1.07)    | 0.78 (0.60-1.01)    | 0.75 (0.57-0.98)    | 0.78 (0.53-1.17)                                   | 0.77 (0.55-1.10)    |                     | 0.74 (0.52-1.07)    | 0.80 (0.55-1.18)                          |                                          | 0.64 (0.43-0.96)    |                             |
| 96.8-105.5                                                                       | 177 | 76327  | 1.12 (0.88-1.42)    | 1.02 (0.79-1.30)    | 0.95 (0.73-1.23)    | 0.95 (0.65-1.39)                                   | 1.08 (0.77-1.50)    | 0.451               | 1.22 (0.87-1.72)    | 0.88 (0.62-1.26)                          | 0.935                                    | 1.35 (0.93-1.94)    |                             |
| 105.6-216.6                                                                      | 176 | 76273  | 1.02 (0.80-1.30)    | 0.89 (0.69-1.15)    | 0.85 (0.65-1.12)    | 0.78 (0.53-1.16)                                   | 1.02 (0.72-1.45)    |                     | 0.90 (0.61-1.34)    | 0.85 (0.60-1.22)                          |                                          | 0.65 (0.40-1.05)    |                             |
| p-trend                                                                          |     |        | 0.331               | 0.931               | 0.696               | 0.422                                              | 0.474               |                     | 0.703               | 0.671                                     |                                          | 0.787               |                             |
| <b>Hypertension (SBP &gt;= 140 mmHg, or DBP &gt;= 90 mmHg, or self-reported)</b> |     |        |                     |                     |                     |                                                    |                     |                     |                     |                                           |                                          |                     |                             |
| Normotensive                                                                     | 300 | 174179 | 1 (referent)        | 1 (referent)        | 1 (referent)        | 1 (referent)                                       | 1 (referent)        |                     | 1 (referent)        | 1 (referent)                              |                                          | 1 (referent)        |                             |
| Hypertensive                                                                     | 291 | 133139 | 1.03 (0.87-1.21)    | 0.97 (0.81-1.15)    | 0.99 (0.82-1.19)    | 0.91 (0.71-1.16)                                   | 1.04 (0.81-1.33)    | 0.673               | 1.16 (0.88-1.52)    | 0.85 (0.68-1.06)                          | 0.175                                    | 0.81 (0.59-1.10)    |                             |



| Age > 53 yrs        | Age           | Never smokers       | Ever smokers        | Smoking       | Alcohol <= 12g      | Alcohol > 12g       | Alcohol       | No antihypertensive treatment | Antihypertensive treatment | Treatment     | Brain and CNS                                                        |         |
|---------------------|---------------|---------------------|---------------------|---------------|---------------------|---------------------|---------------|-------------------------------|----------------------------|---------------|----------------------------------------------------------------------|---------|
| HR (adjusted)       | p-interaction | HR (adjusted)       | HR (adjusted)       | p-interaction | HR (adjusted)       | HR (adjusted)       | p-interaction | HR (adjusted)                 | HR (adjusted)              | p-interaction |                                                                      |         |
| 381<br>154015       |               | 238<br>141931       | 345<br>160623       |               | 347<br>205214       | 244<br>102104       |               | 399<br>227336                 | 71<br>37017                |               | Cases<br>Cohort size                                                 |         |
| 1.014 (0.961-1.071) | 0.294         | 1.004 (0.933-1.080) | 1.000 (0.941-1.062) | 0.82          | 1.018 (0.959-1.081) | 0.976 (0.907-1.052) | 0.169         | 1.002 (0.943-1.065)           | 0.962 (0.847-1.094)        | 0.892         | Mean Systolic Blood Pressure continuous (per 10mmHg increase)        |         |
| 0.980 (0.887-1.083) | 0.821         | 1.004 (0.883-1.142) | 0.959 (0.861-1.067) | 0.509         | 1.009 (0.907-1.121) | 0.931 (0.818-1.060) | 0.256         | 0.945 (0.849-1.052)           | 0.922 (0.720-1.181)        | 0.556         | Mean Diastolic Blood Pressure continuous (per 10mmHg increase)       |         |
| 1.002 (0.921-1.090) | 0.512         | 1.005 (0.899-1.123) | 0.979 (0.893-1.074) | 0.626         | 1.018 (0.930-1.115) | 0.948 (0.847-1.060) | 0.179         | 0.973 (0.887-1.068)           | 0.929 (0.752-1.147)        | 0.68          | Mean Blood Pressure (1/3SBP+2/3DBP) continuous (per 10mmHg increase) |         |
| 1 (referent)        |               | 1 (referent)        | 1 (referent)        |               | 1 (referent)        | 1 (referent)        |               | 1 (referent)                  | 1 (referent)               |               | Systolic Blood Pressure (mmHg) ESH classification                    |         |
| 0.91 (0.64-1.30)    |               | 0.85 (0.56-1.29)    | 0.94 (0.67-1.32)    |               | 0.83 (0.59-1.16)    | 0.99 (0.65-1.51)    |               | 0.85 (0.63-1.15)              | 0.70 (0.21-2.39)           |               | < 120                                                                |         |
| 0.77 (0.54-1.10)    |               | 1.16 (0.78-1.73)    | 0.99 (0.70-1.40)    |               | 0.90 (0.64-1.27)    | 1.18 (0.79-1.79)    |               | 1.07 (0.79-1.44)              | 0.78 (0.25-2.41)           |               | 120-129                                                              |         |
| 0.98 (0.71-1.36)    | 0.403         | 0.94 (0.62-1.40)    | 0.99 (0.70-1.38)    | 0.829         | 0.98 (0.71-1.36)    | 0.89 (0.58-1.35)    | 0.246         | 0.98 (0.72-1.33)              | 0.44 (0.15-1.31)           | 0.817         | 130-139                                                              |         |
| 1.02 (0.69-1.51)    |               | 0.99 (0.58-1.69)    | 0.91 (0.57-1.44)    |               | 0.92 (0.59-1.43)    | 0.99 (0.58-1.70)    |               | 0.92 (0.58-1.47)              | 0.45 (0.14-1.43)           |               | 140-159                                                              |         |
| 0.81 (0.43-1.54)    |               | 0.80 (0.31-2.06)    | 0.92 (0.45-1.89)    |               | 1.06 (0.54-2.10)    | 0.58 (0.20-1.65)    |               | 0.46 (0.14-1.46)              | 0.89 (0.26-3.05)           |               | 160-179                                                              |         |
| 0.877               |               | 0.964               | 0.83                |               | 0.855               | 0.466               |               | 0.802                         | 0.381                      |               | >= 180                                                               | p-trend |
| 1 (referent)        |               | 1 (referent)        | 1 (referent)        |               | 1 (referent)        | 1 (referent)        |               | 1 (referent)                  | 1 (referent)               |               | Diastolic Blood Pressure (mmHg) ESH classification                   |         |
| 0.90 (0.68-1.19)    |               | 1.17 (0.82-1.66)    | 1.00 (0.74-1.33)    |               | 1.13 (0.85-1.50)    | 0.94 (0.66-1.34)    |               | 0.98 (0.76-1.27)              | 1.66 (0.70-3.93)           |               | < 80                                                                 |         |
| 0.93 (0.68-1.27)    |               | 1.35 (0.93-1.98)    | 1.01 (0.72-1.40)    |               | 1.04 (0.74-1.45)    | 1.22 (0.85-1.76)    |               | 1.03 (0.76-1.39)              | 1.39 (0.58-3.33)           |               | 80-84                                                                |         |
| 0.96 (0.72-1.28)    | 0.879         | 1.03 (0.70-1.52)    | 1.00 (0.73-1.36)    | 0.501         | 1.17 (0.86-1.59)    | 0.80 (0.54-1.17)    | 0.181         | 0.79 (0.57-1.09)              | 1.17 (0.51-2.68)           | 0.687         | 85-89                                                                |         |
| 0.90 (0.57-1.41)    |               | 1.13 (0.62-2.07)    | 0.72 (0.42-1.26)    |               | 0.97 (0.57-1.65)    | 0.80 (0.44-1.46)    |               | 1.03 (0.61-1.74)              | 0.64 (0.20-2.01)           |               | 90-99                                                                |         |
| 0.62 (0.23-1.70)    |               | 0.34 (0.05-2.48)    | 0.61 (0.19-1.93)    |               | 0.75 (0.24-2.39)    | 0.26 (0.04-1.85)    |               | no cases                      | 1.73 (0.44-6.75)           |               | 100-109                                                              |         |
| 0.546               |               | 0.925               | 0.42                |               | 0.733               | 0.207               |               | 0.187                         | 0.49                       |               | >= 110                                                               | p-trend |
| 1 (referent)        |               | 1 (referent)        | 1 (referent)        |               | 1 (referent)        | 1 (referent)        |               | 1 (referent)                  | 1 (referent)               |               | Systolic Blood Pressure (mmHg) ASH classification                    |         |
| 0.84 (0.61-1.15)    |               | 1.00 (0.70-1.42)    | 0.96 (0.71-1.30)    |               | 0.86 (0.65-1.15)    | 1.09 (0.75-1.57)    |               | 0.95 (0.73-1.23)              | 0.75 (0.25-2.22)           |               | < 120                                                                |         |
| 0.99 (0.71-1.36)    | 0.062         | 0.92 (0.62-1.38)    | 0.98 (0.70-1.38)    | 0.986         | 0.98 (0.71-1.36)    | 0.88 (0.58-1.34)    | 0.229         | 0.97 (0.72-1.32)              | 0.43 (0.14-1.30)           | 0.679         | 120-139                                                              |         |
| 0.98 (0.67-1.43)    |               | 0.94 (0.57-1.56)    | 0.91 (0.59-1.39)    |               | 0.94 (0.63-1.42)    | 0.89 (0.53-1.50)    |               | 0.82 (0.53-1.29)              | 0.56 (0.18-1.68)           |               | 140-159                                                              |         |
| 0.611               |               | 0.69                | 0.75                |               | 0.991               | 0.366               |               | 0.538                         | 0.202                      |               | >= 160                                                               | p-trend |
| 1 (referent)        |               | 1 (referent)        | 1 (referent)        |               | 1 (referent)        | 1 (referent)        |               | 1 (referent)                  | 1 (referent)               |               | Diastolic Blood Pressure (mmHg) ASH classification                   |         |
| 0.91 (0.71-1.16)    |               | 1.24 (0.92-1.68)    | 1.00 (0.78-1.29)    |               | 1.09 (0.85-1.40)    | 1.05 (0.78-1.43)    |               | 1.00 (0.80-1.25)              | 1.52 (0.69-3.35)           |               | < 80                                                                 |         |
| 0.96 (0.72-1.28)    | 0.913         | 1.03 (0.70-1.52)    | 1.00 (0.73-1.36)    | 0.511         | 1.17 (0.86-1.59)    | 0.80 (0.54-1.17)    | 0.114         | 0.79 (0.57-1.09)              | 1.17 (0.51-2.68)           | 0.584         | 80-89                                                                |         |
| 0.84 (0.55-1.29)    |               | 0.97 (0.54-1.74)    | 0.70 (0.42-1.17)    |               | 0.93 (0.57-1.53)    | 0.69 (0.39-1.24)    |               | 0.84 (0.50-1.43)              | 0.84 (0.30-2.31)           |               | 90-99                                                                |         |
| 0.523               |               | 0.973               | 0.381               |               | 0.646               | 0.125               |               | 0.208                         | 0.422                      |               | >= 100                                                               | p-trend |
| 1 (referent)        |               | 1 (referent)        | 1 (referent)        |               | 1 (referent)        | 1 (referent)        |               | 1 (referent)                  | two cases in referent      |               | Mean BP (mmHg) (1/3SBP+2/3DBP) Cohort-specific quartiles             |         |
| 0.89 (0.63-1.26)    |               | 0.81 (0.53-1.22)    | 0.78 (0.55-1.10)    |               | 0.79 (0.57-1.11)    | 0.74 (0.49-1.14)    |               | 0.79 (0.59-1.06)              | -                          |               | 50.0-88.3                                                            |         |
| 0.87 (0.62-1.22)    | 0.776         | 1.07 (0.72-1.58)    | 1.02 (0.74-1.41)    | 0.439         | 1.00 (0.73-1.37)    | 1.03 (0.69-1.53)    | 0.229         | 1.06 (0.80-1.41)              | -                          | -             | 88.5-96.6                                                            |         |
| 0.98 (0.70-1.35)    |               | 1.02 (0.68-1.53)    | 0.84 (0.60-1.18)    |               | 1.00 (0.72-1.39)    | 0.77 (0.51-1.17)    |               | 0.85 (0.62-1.18)              | -                          |               | 96.8-105.5                                                           |         |
| 0.91                |               | 0.539               | 0.692               |               | 0.597               | 0.52                |               | 0.825                         | -                          |               | 105.6-216.6                                                          | p-trend |
| 1 (referent)        |               | 1 (referent)        | 1 (referent)        |               | 1 (referent)        | 1 (referent)        |               | -                             | -                          |               | Hypertension (SBP >= 140 mmHg, or DBP >= 90 mmHg, or self-reported)  |         |
| 1.05 (0.85-1.30)    | 0.219         | 1.01 (0.76-1.33)    | 0.96 (0.76-1.20)    | 0.758         | 1.10 (0.88-1.38)    | 0.82 (0.63-1.07)    | 0.06          | 1 (referent)                  | 1.03 (0.76-1.38)           |               | Normotensive                                                         |         |
|                     |               |                     |                     |               |                     |                     |               |                               |                            |               | Hypertensive                                                         |         |

| Glioblastoma                                                         |        | Excluding first 2 years of follow-up |                     |                     | Men                 | Women               | Sex                 | BMI <= 25 mg/m <sup>2</sup> | BMI > 25 mg/m <sup>2</sup> | BMI                 | Age <= 53 yrs |                     |
|----------------------------------------------------------------------|--------|--------------------------------------|---------------------|---------------------|---------------------|---------------------|---------------------|-----------------------------|----------------------------|---------------------|---------------|---------------------|
| Cases                                                                | Cohort | HR (crude)                           | HR (adjusted)       | HR (adjusted)       | HR (adjusted)       | HR (adjusted)       | p-interaction       | HR (adjusted)               | HR (adjusted)              | p-interaction       | HR (adjusted) |                     |
| Cases                                                                |        | 297                                  | 297                 | 278                 | 153                 | 144                 |                     | 124                         | 173                        |                     | 105           |                     |
| Cohort size                                                          |        | 307318                               | 307318              | 301857              | 112591              | 194727              |                     | 146326                      | 160992                     |                     | 153303        |                     |
| Mean Systolic Blood Pressure continuous (per 10mmHg increase)        | 297    | 307318                               | 0.999 (0.938-1.063) | 0.971 (0.908-1.037) | 0.978 (0.913-1.047) | 0.900 (0.815-0.994) | 1.030 (0.942-1.126) | 0.027                       | 0.941 (0.845-1.048)        | 0.999 (0.919-1.085) | 0.271         | 0.914 (0.801-1.042) |
| Mean Diastolic Blood Pressure continuous (per 10mmHg increase)       | 297    | 307318                               | 1.013 (0.908-1.130) | 0.955 (0.851-1.073) | 0.963 (0.855-1.086) | 0.901 (0.765-1.060) | 1.009 (0.854-1.191) | 0.262                       | 1.046 (0.875-1.252)        | 0.918 (0.790-1.066) | 0.31          | 0.962 (0.786-1.177) |
| Mean Blood Pressure (1/3SBP+2/3DBP) continuous (per 10mmHg increase) | 297    | 307318                               | 1.005 (0.915-1.104) | 0.956 (0.864-1.056) | 0.965 (0.870-1.070) | 0.878 (0.759-1.015) | 1.028 (0.894-1.182) | 0.079                       | 0.979 (0.837-1.146)        | 0.958 (0.843-1.088) | 0.988         | 0.922 (0.768-1.108) |
| Systolic Blood Pressure (mmHg) ESH classification                    |        |                                      |                     |                     |                     |                     |                     |                             |                            |                     |               |                     |
| < 120                                                                | 66     | 86141                                | 1 (referent)        |                             | 1 (referent)               | 1 (referent)        |               | 1 (referent)        |
| 120-129                                                              | 60     | 66446                                | 0.95 (0.67-1.36)    | 0.87 (0.61-1.25)    | 0.85 (0.59-1.23)    | 1.04 (0.62-1.72)    | 0.68 (0.41-1.15)    |                             | 0.80 (0.48-1.31)           | 1.01 (0.60-1.69)    |               | 0.82 (0.48-1.40)    |
| 130-139                                                              | 62     | 57482                                | 1.02 (0.71-1.45)    | 0.89 (0.62-1.28)    | 0.85 (0.58-1.24)    | 0.95 (0.56-1.60)    | 0.81 (0.48-1.35)    |                             | 0.92 (0.55-1.54)           | 0.94 (0.56-1.59)    |               | 1.38 (0.82-2.31)    |
| 140-159                                                              | 75     | 68235                                | 0.91 (0.64-1.28)    | 0.77 (0.54-1.11)    | 0.78 (0.54-1.13)    | 0.71 (0.42-1.21)    | 0.83 (0.51-1.36)    | 0.093                       | 0.85 (0.50-1.44)           | 0.81 (0.49-1.34)    | 0.526         | 0.73 (0.38-1.37)    |
| 160-179                                                              | 28     | 22656                                | 1.02 (0.64-1.62)    | 0.86 (0.54-1.39)    | 0.87 (0.54-1.41)    | 0.79 (0.40-1.58)    | 0.94 (0.49-1.80)    |                             | 0.60 (0.23-1.57)           | 1.05 (0.58-1.90)    |               | 0.20 (0.03-1.50)    |
| >= 180                                                               | 6      | 6358                                 | 0.79 (0.34-1.84)    | 0.65 (0.28-1.54)    | 0.68 (0.29-1.61)    | 0.20 (0.03-1.49)    | 1.15 (0.44-3.03)    |                             | 0.48 (0.06-3.53)           | 0.77 (0.29-2.06)    |               | no cases            |
| p-trend                                                              |        |                                      | 0.704               | 0.213               | 0.276               | 0.057               | 0.98                |                             | 0.341                      | 0.561               |               | 0.247               |
| Diastolic Blood Pressure (mmHg) ESH classification                   |        |                                      |                     |                     |                     |                     |                     |                             |                            |                     |               |                     |
| < 80                                                                 | 108    | 132590                               | 1 (referent)        |                             | 1 (referent)               | 1 (referent)        |               | 1 (referent)        |
| 80-84                                                                | 68     | 64872                                | 1.12 (0.83-1.53)    | 1.05 (0.77-1.43)    | 1.07 (0.77-1.47)    | 0.92 (0.59-1.42)    | 1.17 (0.76-1.80)    |                             | 1.12 (0.71-1.77)           | 0.99 (0.65-1.50)    |               | 1.51 (0.92-2.49)    |
| 85-89                                                                | 48     | 41500                                | 1.13 (0.80-1.60)    | 1.03 (0.72-1.46)    | 1.04 (0.72-1.49)    | 1.00 (0.62-1.61)    | 1.00 (0.60-1.69)    |                             | 1.15 (0.66-1.99)           | 0.97 (0.62-1.52)    |               | 1.62 (0.92-2.85)    |
| 90-99                                                                | 56     | 51196                                | 1.06 (0.76-1.47)    | 0.93 (0.67-1.31)    | 0.95 (0.67-1.35)    | 0.77 (0.48-1.23)    | 1.15 (0.71-1.86)    | 0.215                       | 1.25 (0.74-2.12)           | 0.81 (0.53-1.26)    | 0.371         | 1.02 (0.54-1.92)    |
| 100-109                                                              | 14     | 13896                                | 0.96 (0.55-1.68)    | 0.82 (0.46-1.45)    | 0.88 (0.49-1.56)    | 0.65 (0.30-1.40)    | 1.05 (0.45-2.48)    |                             | 0.54 (0.13-2.22)           | 0.89 (0.47-1.68)    |               | 0.76 (0.23-2.53)    |
| >= 110                                                               | 3      | 3264                                 | 0.88 (0.28-2.79)    | 0.73 (0.23-2.32)    | 0.53 (0.13-2.15)    | 0.66 (0.16-2.73)    | 0.79 (0.11-5.75)    |                             | 1.41 (0.19-10.26)          | 0.59 (0.14-2.41)    |               | no cases            |
| p-trend                                                              |        |                                      | 0.9                 | 0.439               | 0.476               | 0.182               | 0.795               |                             | 0.683                      | 0.304               |               | 0.854               |
| Systolic Blood Pressure (mmHg) ASH classification                    |        |                                      |                     |                     |                     |                     |                     |                             |                            |                     |               |                     |
| < 120                                                                | 66     | 86141                                | 1 (referent)        |                             | 1 (referent)               | 1 (referent)        |               | 1 (referent)        |
| 120-139                                                              | 122    | 123928                               | 0.99 (0.73-1.34)    | 0.88 (0.65-1.20)    | 0.85 (0.62-1.17)    | 0.99 (0.63-1.58)    | 0.74 (0.48-1.15)    |                             | 0.85 (0.56-1.30)           | 0.97 (0.61-1.55)    |               | 1.05 (0.67-1.65)    |
| 140-159                                                              | 75     | 68235                                | 0.90 (0.64-1.28)    | 0.77 (0.54-1.11)    | 0.78 (0.54-1.13)    | 0.72 (0.42-1.22)    | 0.83 (0.51-1.35)    | 0.146                       | 0.85 (0.50-1.43)           | 0.81 (0.49-1.34)    | 0.369         | 0.71 (0.37-1.34)    |
| >= 160                                                               | 34     | 29014                                | 0.97 (0.63-1.50)    | 0.82 (0.52-1.28)    | 0.83 (0.52-1.31)    | 0.67 (0.34-1.31)    | 0.98 (0.54-1.77)    |                             | 0.58 (0.24-1.40)           | 0.99 (0.56-1.75)    |               | 0.16 (0.02-1.19)    |
| p-trend                                                              |        |                                      | 0.688               | 0.223               | 0.303               | 0.087               | 0.905               |                             | 0.252                      | 0.69                |               | 0.066               |
| Diastolic Blood Pressure (mmHg) ASH classification                   |        |                                      |                     |                     |                     |                     |                     |                             |                            |                     |               |                     |
| < 80                                                                 | 108    | 132590                               | 1 (referent)        |                             | 1 (referent)               | 1 (referent)        |               | 1 (referent)        |
| 80-89                                                                | 116    | 106372                               | 1.13 (0.86-1.47)    | 1.04 (0.79-1.36)    | 1.05 (0.80-1.40)    | 0.95 (0.65-1.39)    | 1.10 (0.75-1.62)    |                             | 1.13 (0.76-1.69)           | 0.98 (0.68-1.41)    |               | 1.55 (1.00-2.42)    |
| 90-99                                                                | 56     | 51196                                | 1.06 (0.76-1.47)    | 0.93 (0.67-1.31)    | 0.95 (0.67-1.35)    | 0.77 (0.48-1.23)    | 1.15 (0.71-1.86)    | 0.157                       | 1.25 (0.74-2.12)           | 0.81 (0.53-1.26)    | 0.426         | 1.02 (0.54-1.91)    |
| >= 100                                                               | 17     | 17160                                | 0.94 (0.56-1.58)    | 0.80 (0.47-1.36)    | 0.81 (0.47-1.40)    | 0.65 (0.32-1.31)    | 1.01 (0.45-2.25)    |                             | 0.68 (0.21-2.19)           | 0.83 (0.45-1.51)    |               | 0.62 (0.19-2.07)    |
| p-trend                                                              |        |                                      | 0.9                 | 0.444               | 0.513               | 0.144               | 0.681               |                             | 0.746                      | 0.329               |               | 0.863               |
| Mean BP (mmHg) (1/3SBP+2/3DBP) Cohort-specific quartiles             |        |                                      |                     |                     |                     |                     |                     |                             |                            |                     |               |                     |
| 50.0-88.3                                                            | 61     | 76991                                | 1 (referent)        |                             | 1 (referent)               | 1 (referent)        |               | 1 (referent)        |
| 88.5-96.6                                                            | 61     | 77727                                | 0.82 (0.57-1.18)    | 0.76 (0.53-1.08)    | 0.78 (0.54-1.14)    | 0.68 (0.39-1.17)    | 0.81 (0.50-1.32)    |                             | 0.95 (0.59-1.54)           | 0.60 (0.35-1.02)    |               | 0.77 (0.44-1.36)    |
| 96.8-105.5                                                           | 87     | 76327                                | 1.04 (0.74-1.46)    | 0.91 (0.64-1.29)    | 0.91 (0.63-1.30)    | 0.98 (0.59-1.60)    | 0.77 (0.47-1.26)    | 0.363                       | 1.09 (0.67-1.78)           | 0.79 (0.49-1.27)    | 0.88          | 1.48 (0.88-2.51)    |
| 105.6-216.6                                                          | 88     | 76273                                | 0.96 (0.68-1.36)    | 0.81 (0.56-1.15)    | 0.83 (0.57-1.20)    | 0.67 (0.39-1.13)    | 0.96 (0.59-1.56)    |                             | 0.85 (0.48-1.49)           | 0.75 (0.47-1.21)    |               | 0.67 (0.34-1.33)    |
| p-trend                                                              |        |                                      | 0.783               | 0.486               | 0.552               | 0.329               | 0.896               |                             | 0.759                      | 0.711               |               | 0.915               |
| Hypertension (SBP >= 140 mmHg, or DBP >= 90 mmHg, or self-reported)  |        |                                      |                     |                     |                     |                     |                     |                             |                            |                     |               |                     |
| Normotensive                                                         | 153    | 174179                               | 1 (referent)        |                             | 1 (referent)               | 1 (referent)        |               | 1 (referent)        |
| Hypertensive                                                         | 144    | 133139                               | 1.00 (0.79-1.26)    | 0.92 (0.72-1.17)    | 0.94 (0.73-1.21)    | 0.83 (0.59-1.16)    | 1.02 (0.72-1.45)    | 0.298                       | 1.09 (0.75-1.59)           | 0.85 (0.62-1.16)    | 0.444         | 0.88 (0.58-1.36)    |

| Age > 53 yrs                                                                                                              | Age           | Never smokers                                                                                                             | Ever smokers                                                                                                              | Smoking       | Alcohol <= 12g                                                                                                            | Alcohol > 12g                                                                                                             | Alcohol       | No antihypertensive treatment                                                                                     | Antihypertensive treatment                                                                                                | Treatment     |                                                                                                                               |
|---------------------------------------------------------------------------------------------------------------------------|---------------|---------------------------------------------------------------------------------------------------------------------------|---------------------------------------------------------------------------------------------------------------------------|---------------|---------------------------------------------------------------------------------------------------------------------------|---------------------------------------------------------------------------------------------------------------------------|---------------|-------------------------------------------------------------------------------------------------------------------|---------------------------------------------------------------------------------------------------------------------------|---------------|-------------------------------------------------------------------------------------------------------------------------------|
| HR (adjusted)                                                                                                             | p-interaction | HR (adjusted)                                                                                                             | HR (adjusted)                                                                                                             | p-interaction | HR (adjusted)                                                                                                             | HR (adjusted)                                                                                                             | p-interaction | HR (adjusted)                                                                                                     | HR (adjusted)                                                                                                             | p-interaction |                                                                                                                               |
| 192<br>154015                                                                                                             |               | 132<br>141931                                                                                                             | 161<br>160623                                                                                                             |               | 178<br>205214                                                                                                             | 119<br>102104                                                                                                             |               | 190<br>227336                                                                                                     | 37<br>37017                                                                                                               |               | Cases<br>Cohort size                                                                                                          |
| 0.993 (0.919-1.072)                                                                                                       | 0.23          | 0.995 (0.902-1.098)                                                                                                       | 0.955 (0.873-1.045)                                                                                                       | 0.505         | 0.971 (0.891-1.057)                                                                                                       | 0.969 (0.872-1.078)                                                                                                       | 0.636         | 0.981 (0.897-1.073)                                                                                               | 0.922 (0.771-1.103)                                                                                                       | 0.87          | Mean Systolic Blood Pressure continuous (per 10mmHg increase)                                                                 |
| 0.951 (0.826-1.096)                                                                                                       | 0.945         | 0.939 (0.787-1.121)                                                                                                       | 0.975 (0.834-1.139)                                                                                                       | 0.827         | 0.978 (0.843-1.135)                                                                                                       | 0.919 (0.764-1.105)                                                                                                       | 0.679         | 0.972 (0.833-1.136)                                                                                               | 0.750 (0.524-1.072)                                                                                                       | 0.137         | Mean Diastolic Blood Pressure continuous (per 10mmHg increase)                                                                |
| 0.971 (0.861-1.095)                                                                                                       | 0.602         | 0.966 (0.831-1.124)                                                                                                       | 0.954 (0.833-1.092)                                                                                                       | 0.829         | 0.967 (0.850-1.100)                                                                                                       | 0.936 (0.798-1.098)                                                                                                       | 0.634         | 0.972 (0.849-1.113)                                                                                               | 0.809 (0.598-1.094)                                                                                                       | 0.446         | Mean Blood Pressure (1/3SBP+2/3DBP) continuous (per 10mmHg increase)                                                          |
| 1 (referent)<br>0.90 (0.56-1.45)<br>0.65 (0.39-1.07)<br>0.77 (0.49-1.20)<br>0.95 (0.56-1.63)<br>0.72 (0.29-1.75)<br>0.492 | 0.473         | 1 (referent)<br>0.80 (0.47-1.36)<br>0.86 (0.50-1.46)<br>0.72 (0.42-1.22)<br>1.04 (0.53-2.01)<br>0.80 (0.24-2.69)<br>0.637 | 1 (referent)<br>1.02 (0.63-1.66)<br>1.02 (0.62-1.68)<br>0.87 (0.53-1.42)<br>0.78 (0.39-1.54)<br>0.59 (0.17-1.97)<br>0.271 | 0.636         | 1 (referent)<br>0.81 (0.52-1.25)<br>0.71 (0.44-1.13)<br>0.68 (0.43-1.07)<br>0.89 (0.50-1.59)<br>0.71 (0.25-2.02)<br>0.253 | 1 (referent)<br>1.01 (0.55-1.87)<br>1.26 (0.70-2.29)<br>0.96 (0.52-1.75)<br>0.88 (0.39-1.97)<br>0.58 (0.13-2.58)<br>0.565 | 0.844         | 1 (referent)<br>0.89 (0.58-1.35)<br>0.97 (0.63-1.49)<br>0.90 (0.58-1.39)<br>0.93 (0.48-1.81)<br>no cases<br>0.439 | three cases in referent<br>-<br>-<br>-<br>-<br>-<br>-                                                                     | -             | ESH classification<br>< 120<br>120-129<br>130-139<br>140-159<br>160-179<br>≥ 180<br>p-trend                                   |
| 1 (referent)<br>0.83 (0.56-1.24)<br>0.79 (0.51-1.23)<br>0.87 (0.58-1.29)<br>0.80 (0.42-1.53)<br>0.87 (0.27-2.79)<br>0.403 | 0.759         | 1 (referent)<br>1.13 (0.72-1.78)<br>0.90 (0.52-1.55)<br>0.95 (0.57-1.58)<br>0.85 (0.36-2.03)<br>0.56 (0.08-4.13)<br>0.516 | 1 (referent)<br>0.98 (0.64-1.52)<br>1.17 (0.74-1.85)<br>0.94 (0.60-1.49)<br>0.81 (0.38-1.73)<br>0.85 (0.20-3.52)<br>0.721 | 0.844         | 1 (referent)<br>1.06 (0.72-1.58)<br>0.92 (0.57-1.48)<br>1.12 (0.73-1.71)<br>0.81 (0.37-1.78)<br>0.96 (0.23-3.95)<br>0.968 | 1 (referent)<br>1.02 (0.62-1.67)<br>1.15 (0.68-1.94)<br>0.71 (0.41-1.25)<br>0.81 (0.35-1.85)<br>0.47 (0.06-3.47)<br>0.245 | 0.445         | 1 (referent)<br>0.97 (0.67-1.41)<br>0.93 (0.60-1.45)<br>0.89 (0.57-1.38)<br>1.09 (0.52-2.30)<br>no cases<br>0.526 | 1 (referent)<br>1.58 (0.54-4.63)<br>0.82 (0.25-2.64)<br>0.61 (0.20-1.85)<br>0.30 (0.06-1.62)<br>1.48 (0.27-8.11)<br>0.078 | 0.161         | Diastolic Blood Pressure (mmHg)<br>ESH classification<br>< 80<br>80-84<br>85-89<br>90-99<br>100-109<br>≥ 110<br>p-trend       |
| 1 (referent)<br>0.77 (0.50-1.18)<br>0.77 (0.49-1.21)<br>0.91 (0.54-1.52)<br>0.824                                         | 0.122         | 1 (referent)<br>0.82 (0.52-1.31)<br>0.71 (0.42-1.22)<br>0.98 (0.52-1.85)<br>0.666                                         | 1 (referent)<br>1.02 (0.66-1.57)<br>0.87 (0.53-1.42)<br>0.73 (0.39-1.40)<br>0.265                                         | 0.615         | 1 (referent)<br>0.76 (0.52-1.12)<br>0.69 (0.44-1.08)<br>0.85 (0.49-1.48)<br>0.351                                         | 1 (referent)<br>1.14 (0.66-1.95)<br>0.95 (0.52-1.74)<br>0.80 (0.37-1.73)<br>0.424                                         | 0.628         | 1 (referent)<br>0.92 (0.64-1.34)<br>0.90 (0.58-1.39)<br>0.75 (0.39-1.47)<br>0.424                                 | three cases in referent<br>-<br>-<br>-<br>-                                                                               | -             | Systolic Blood Pressure (mmHg)<br>ASH classification<br>< 120<br>120-139<br>140-159<br>≥ 160<br>p-trend                       |
| 1 (referent)<br>0.81 (0.58-1.15)<br>0.87 (0.58-1.29)<br>0.81 (0.45-1.46)<br>0.403                                         | 0.739         | 1 (referent)<br>1.03 (0.69-1.55)<br>0.95 (0.57-1.58)<br>0.80 (0.35-1.80)<br>0.653                                         | 1 (referent)<br>1.06 (0.73-1.53)<br>0.94 (0.59-1.49)<br>0.81 (0.41-1.63)<br>0.588                                         | 0.965         | 1 (referent)<br>1.01 (0.71-1.43)<br>1.12 (0.73-1.71)<br>0.84 (0.41-1.71)<br>0.972                                         | 1 (referent)<br>1.07 (0.70-1.65)<br>0.71 (0.41-1.25)<br>0.74 (0.34-1.62)<br>0.216                                         | 0.386         | 1 (referent)<br>0.96 (0.69-1.33)<br>0.89 (0.57-1.39)<br>0.90 (0.43-1.90)<br>0.603                                 | 1 (referent)<br>1.17 (0.43-3.22)<br>0.62 (0.20-1.87)<br>0.51 (0.13-1.98)<br>0.103                                         | 0.178         | Diastolic Blood Pressure (mmHg)<br>ASH classification<br>< 80<br>80-89<br>90-99<br>≥ 100<br>p-trend                           |
| 1 (referent)<br>0.73 (0.45-1.17)<br>0.66 (0.42-1.04)<br>0.78 (0.51-1.21)<br>0.444                                         | 0.802         | 1 (referent)<br>0.93 (0.55-1.58)<br>0.80 (0.47-1.38)<br>0.96 (0.56-1.64)<br>0.837                                         | 1 (referent)<br>0.63 (0.38-1.05)<br>1.00 (0.63-1.58)<br>0.72 (0.44-1.17)<br>0.526                                         | 0.734         | 1 (referent)<br>0.79 (0.51-1.22)<br>0.74 (0.47-1.15)<br>0.83 (0.53-1.30)<br>0.453                                         | 1 (referent)<br>0.68 (0.36-1.30)<br>1.17 (0.66-2.09)<br>0.79 (0.42-1.46)<br>0.85                                          | 0.916         | 1 (referent)<br>0.88 (0.58-1.35)<br>1.06 (0.69-1.61)<br>0.90 (0.56-1.44)<br>0.903                                 | two cases in referent<br>-<br>-<br>-                                                                                      | -             | Mean BP (mmHg) (1/3SBP+2/3DBP)<br>Cohort-specific quartiles<br>50.0-88.3<br>88.5-96.6<br>96.8-105.5<br>105.6-216.6<br>p-trend |
| 1 (referent)<br>0.94 (0.70-1.27)                                                                                          | 0.777         | 1 (referent)<br>0.98 (0.68-1.42)                                                                                          | 1 (referent)<br>0.87 (0.62-1.21)                                                                                          | 0.664         | 1 (referent)<br>1.04 (0.76-1.42)                                                                                          | 1 (referent)<br>0.78 (0.53-1.14)                                                                                          | 0.208         | -<br>1 (referent)                                                                                                 | -<br>1.17 (0.77-1.77)                                                                                                     |               | Hypertension (SBP ≥ 140 mmHg,<br>or DBP ≥ 90 mmHg, or self-reported)<br>Normotensive<br>Hypertensive                          |

| Thyroid                                                                          |        | Excluding first 2 years of follow-up |                     |                     | Men                 | Women               | Sex                 | BMI <= 25 mg/m <sup>2</sup> | BMI > 25 mg/m <sup>2</sup> | BMI                 | Age <= 53 yrs |                     |
|----------------------------------------------------------------------------------|--------|--------------------------------------|---------------------|---------------------|---------------------|---------------------|---------------------|-----------------------------|----------------------------|---------------------|---------------|---------------------|
| Cases                                                                            | Cohort | HR (crude)                           | HR (adjusted)       | HR (adjusted)       | HR (adjusted)       | HR (adjusted)       | p-interaction       | HR (adjusted)               | HR (adjusted)              | p-interaction       | HR (adjusted) |                     |
| Cases                                                                            |        | 420                                  | 420                 | 382                 | 71                  | 349                 |                     | 202                         | 218                        |                     | 247           |                     |
| Cohort size                                                                      |        | 307318                               | 307318              | 301857              | 112591              | 194727              |                     | 146326                      | 160992                     |                     | 153303        |                     |
| <b>Mean Systolic Blood Pressure continuous (per 10mmHg increase)</b>             | 420    | 307318                               | 0.995 (0.939-1.054) | 1.022 (0.963-1.084) | 1.034 (0.972-1.100) | 1.006 (0.865-1.171) | 1.026 (0.962-1.094) | 0.466                       | 1.013 (0.926-1.109)        | 1.027 (0.950-1.110) | 0.951         | 1.057 (0.972-1.149) |
| <b>Mean Diastolic Blood Pressure continuous (per 10mmHg increase)</b>            | 420    | 307318                               | 0.979 (0.889-1.078) | 1.032 (0.934-1.141) | 1.031 (0.928-1.146) | 0.897 (0.696-1.156) | 1.062 (0.952-1.185) | 0.11                        | 1.031 (0.888-1.197)        | 1.028 (0.900-1.175) | 0.794         | 1.121 (0.983-1.280) |
| <b>Mean Blood Pressure (1/3SBP+2/3DBP) continuous (per 10mmHg increase)</b>      | 420    | 307318                               | 0.985 (0.906-1.073) | 1.033 (0.946-1.128) | 1.041 (0.950-1.142) | 0.948 (0.757-1.188) | 1.051 (0.955-1.156) | 0.197                       | 1.026 (0.899-1.170)        | 1.034 (0.921-1.162) | 0.86          | 1.104 (0.980-1.243) |
| <b>Systolic Blood Pressure (mmHg) ESH classification</b>                         |        |                                      |                     |                     |                     |                     |                     |                             |                            |                     |               |                     |
| < 120                                                                            | 139    | 86141                                | 1 (referent)        |                             | 1 (referent)               | 1 (referent)        |               | 1 (referent)        |
| 120-129                                                                          | 102    | 66446                                | 1.04 (0.80-1.35)    | 1.13 (0.87-1.48)    | 1.15 (0.87-1.51)    | 2.13 (1.00-4.51)    | 1.01 (0.76-1.35)    |                             | 1.03 (0.72-1.48)           | 1.29 (0.86-1.92)    |               | 1.22 (0.89-1.67)    |
| 130-139                                                                          | 75     | 57482                                | 0.94 (0.70-1.25)    | 1.06 (0.78-1.42)    | 0.99 (0.72-1.36)    | 1.87 (0.83-4.18)    | 0.96 (0.69-1.34)    |                             | 0.92 (0.60-1.42)           | 1.21 (0.79-1.86)    |               | 0.90 (0.60-1.35)    |
| 140-159                                                                          | 75     | 68235                                | 0.92 (0.68-1.24)    | 1.05 (0.77-1.44)    | 1.06 (0.76-1.47)    | 1.68 (0.72-3.91)    | 1.01 (0.72-1.42)    | 0.401                       | 0.85 (0.52-1.40)           | 1.26 (0.82-1.92)    | 0.694         | 1.24 (0.81-1.89)    |
| 160-179                                                                          | 28     | 22656                                | 1.22 (0.79-1.87)    | 1.38 (0.89-2.14)    | 1.56 (1.00-2.44)    | 0.70 (0.15-3.39)    | 1.57 (0.99-2.48)    |                             | 1.21 (0.56-2.61)           | 1.58 (0.90-2.76)    |               | 1.68 (0.83-3.41)    |
| >= 180                                                                           | 1      | 6358                                 | 0.18 (0.02-1.28)    | 0.20 (0.03-1.43)    | 0.22 (0.03-1.62)    | no cases            | 0.24 (0.03-1.74)    |                             | 0.67 (0.09-4.97)           | no cases            |               | no cases            |
| p-trend                                                                          |        |                                      | 0.525               | 0.805               | 0.647               | 0.869               | 0.672               |                             | 0.685                      | 0.533               |               | 0.473               |
| <b>Diastolic Blood Pressure (mmHg) ESH classification</b>                        |        |                                      |                     |                     |                     |                     |                     |                             |                            |                     |               |                     |
| < 80                                                                             | 203    | 132590                               | 1 (referent)        |                             | 1 (referent)               | 1 (referent)        |               | 1 (referent)        |
| 80-84                                                                            | 85     | 64872                                | 0.86 (0.66-1.11)    | 0.92 (0.71-1.20)    | 0.98 (0.74-1.28)    | 0.82 (0.43-1.58)    | 0.94 (0.70-1.25)    |                             | 1.05 (0.72-1.52)           | 0.79 (0.55-1.15)    |               | 1.04 (0.75-1.45)    |
| 85-89                                                                            | 48     | 41500                                | 0.79 (0.58-1.09)    | 0.86 (0.62-1.19)    | 0.87 (0.62-1.23)    | 0.95 (0.45-1.98)    | 0.83 (0.58-1.20)    |                             | 1.16 (0.73-1.83)           | 0.66 (0.42-1.04)    |               | 0.91 (0.58-1.43)    |
| 90-99                                                                            | 62     | 51196                                | 0.87 (0.65-1.17)    | 0.99 (0.73-1.33)    | 1.03 (0.75-1.41)    | 1.31 (0.69-2.49)    | 0.89 (0.62-1.26)    | 0.319                       | 1.13 (0.70-1.84)           | 0.86 (0.59-1.27)    | 0.531         | 1.18 (0.78-1.78)    |
| 100-109                                                                          | 16     | 13896                                | 0.89 (0.53-1.50)    | 1.04 (0.61-1.75)    | 1.03 (0.59-1.80)    | no cases            | 1.44 (0.85-2.44)    |                             | 0.27 (0.04-1.92)           | 1.19 (0.68-2.09)    |               | 1.20 (0.55-2.61)    |
| >= 110                                                                           | 6      | 3264                                 | 1.39 (0.61-3.16)    | 1.63 (0.71-3.73)    | 1.88 (0.82-4.30)    | no cases            | 2.27 (0.99-5.21)    |                             | 3.33 (0.81-13.70)          | 1.19 (0.43-3.31)    |               | 3.00 (1.08-8.31)    |
| p-trend                                                                          |        |                                      | 0.417               | 0.88                | 0.707               | 0.631               | 0.653               |                             | 0.69                       | 0.85                |               | 0.26                |
| <b>Systolic Blood Pressure (mmHg) ASH classification</b>                         |        |                                      |                     |                     |                     |                     |                     |                             |                            |                     |               |                     |
| < 120                                                                            | 139    | 86141                                | 1 (referent)        |                             | 1 (referent)               | 1 (referent)        |               | 1 (referent)        |
| 120-139                                                                          | 177    | 123928                               | 0.99 (0.79-1.25)    | 1.10 (0.87-1.40)    | 1.08 (0.85-1.39)    | 2.02 (0.99-4.12)    | 0.99 (0.77-1.28)    |                             | 0.99 (0.72-1.36)           | 1.26 (0.87-1.80)    |               | 1.10 (0.82-1.47)    |
| 140-159                                                                          | 75     | 68235                                | 0.92 (0.68-1.25)    | 1.06 (0.78-1.45)    | 1.07 (0.77-1.48)    | 1.70 (0.73-3.95)    | 1.01 (0.72-1.43)    | 0.396                       | 0.86 (0.53-1.40)           | 1.26 (0.83-1.93)    | 0.641         | 1.25 (0.82-1.91)    |
| >= 160                                                                           | 29     | 29014                                | 1.02 (0.67-1.57)    | 1.15 (0.75-1.79)    | 1.31 (0.84-2.05)    | 0.57 (0.12-2.76)    | 1.31 (0.83-2.07)    |                             | 1.12 (0.54-2.34)           | 1.27 (0.72-2.22)    |               | 1.42 (0.70-2.89)    |
| p-trend                                                                          |        |                                      | 0.807               | 0.534               | 0.316               | 0.954               | 0.437               |                             | 0.84                       | 0.338               |               | 0.198               |
| <b>Diastolic Blood Pressure (mmHg) ASH classification</b>                        |        |                                      |                     |                     |                     |                     |                     |                             |                            |                     |               |                     |
| < 80                                                                             | 203    | 132590                               | 1 (referent)        |                             | 1 (referent)               | 1 (referent)        |               | 1 (referent)        |
| 80-89                                                                            | 133    | 106372                               | 0.83 (0.66-1.04)    | 0.90 (0.71-1.13)    | 0.94 (0.74-1.19)    | 0.87 (0.49-1.54)    | 0.90 (0.70-1.16)    |                             | 1.09 (0.79-1.50)           | 0.74 (0.54-1.02)    |               | 1.00 (0.74-1.34)    |
| 90-99                                                                            | 62     | 51196                                | 0.87 (0.65-1.17)    | 0.99 (0.73-1.34)    | 1.03 (0.75-1.41)    | 1.31 (0.69-2.48)    | 0.89 (0.62-1.26)    | 0.203                       | 1.13 (0.70-1.83)           | 0.86 (0.59-1.27)    | 0.713         | 1.18 (0.78-1.78)    |
| >= 100                                                                           | 22     | 17160                                | 0.99 (0.63-1.55)    | 1.15 (0.73-1.82)    | 1.19 (0.74-1.93)    | no cases            | 1.60 (1.01-2.54)    |                             | 0.69 (0.22-2.19)           | 1.19 (0.72-1.99)    |               | 1.53 (0.81-2.91)    |
| p-trend                                                                          |        |                                      | 0.409               | 0.88                | 0.67                | 0.468               | 0.569               |                             | 0.849                      | 0.977               |               | 0.244               |
| <b>Mean BP (mmHg) (1/3SBP+2/3DBP) Cohort-specific quartiles</b>                  |        |                                      |                     |                     |                     |                     |                     |                             |                            |                     |               |                     |
| 50.0-88.3                                                                        | 121    | 76991                                | 1 (referent)        |                             | 1 (referent)               | 1 (referent)        |               | 1 (referent)        |
| 88.5-96.6                                                                        | 114    | 77727                                | 0.97 (0.75-1.26)    | 1.05 (0.81-1.37)    | 1.04 (0.79-1.38)    | 0.99 (0.47-2.07)    | 1.06 (0.80-1.40)    |                             | 0.85 (0.59-1.21)           | 1.40 (0.92-2.13)    |               | 1.30 (0.94-1.79)    |
| 96.8-105.5                                                                       | 94     | 76327                                | 0.88 (0.66-1.16)    | 0.98 (0.74-1.31)    | 0.96 (0.71-1.30)    | 1.09 (0.51-2.32)    | 0.95 (0.70-1.31)    | 0.679                       | 1.00 (0.68-1.48)           | 1.08 (0.69-1.69)    | 0.665         | 1.15 (0.79-1.67)    |
| 105.6-216.6                                                                      | 91     | 76273                                | 0.99 (0.74-1.33)    | 1.16 (0.85-1.58)    | 1.19 (0.86-1.65)    | 1.15 (0.52-2.56)    | 1.18 (0.84-1.65)    |                             | 0.96 (0.59-1.56)           | 1.41 (0.91-2.19)    |               | 1.47 (0.96-2.24)    |
| p-trend                                                                          |        |                                      | 0.746               | 0.475               | 0.428               | 0.669               | 0.529               |                             | 0.934                      | 0.308               |               | 0.127               |
| <b>Hypertension (SBP &gt;= 140 mmHg, or DBP &gt;= 90 mmHg, or self-reported)</b> |        |                                      |                     |                     |                     |                     |                     |                             |                            |                     |               |                     |
| Normotensive                                                                     | 259    | 174179                               | 1 (referent)        |                             | 1 (referent)               | 1 (referent)        |               | 1 (referent)        |
| Hypertensive                                                                     | 161    | 133139                               | 0.99 (0.80-1.22)    | 1.04 (0.84-1.29)    | 1.03 (0.82-1.29)    | 0.99 (0.59-1.66)    | 1.06 (0.84-1.35)    | 0.489                       | 0.88 (0.62-1.23)           | 1.16 (0.87-1.53)    | 0.406         | 1.09 (0.82-1.47)    |

| Age > 53 yrs                                                                                                              | Age           | Never smokers                                                                                                             | Ever smokers                                                                                                             | Smoking       | Alcohol <= 12g                                                                                                            | Alcohol > 12g                                                                                                             | Alcohol       | No antihypertensive treatment                                                                                             | Antihypertensive treatment                                                                                                | Treatment     | Thyroid                                                                                                                       |
|---------------------------------------------------------------------------------------------------------------------------|---------------|---------------------------------------------------------------------------------------------------------------------------|--------------------------------------------------------------------------------------------------------------------------|---------------|---------------------------------------------------------------------------------------------------------------------------|---------------------------------------------------------------------------------------------------------------------------|---------------|---------------------------------------------------------------------------------------------------------------------------|---------------------------------------------------------------------------------------------------------------------------|---------------|-------------------------------------------------------------------------------------------------------------------------------|
| HR (adjusted)                                                                                                             | p-interaction | HR (adjusted)                                                                                                             | HR (adjusted)                                                                                                            | p-interaction | HR (adjusted)                                                                                                             | HR (adjusted)                                                                                                             | p-interaction | HR (adjusted)                                                                                                             | HR (adjusted)                                                                                                             | p-interaction |                                                                                                                               |
| 173<br>154015                                                                                                             |               | 223<br>141931                                                                                                             | 192<br>160623                                                                                                            |               | 313<br>205214                                                                                                             | 107<br>102104                                                                                                             |               | 336<br>227336                                                                                                             | 57<br>37017                                                                                                               |               | Cases<br>Cohort size                                                                                                          |
| 0.991 (0.911-1.077)                                                                                                       | 0.21          | 1.007 (0.928-1.094)                                                                                                       | 1.041 (0.955-1.136)                                                                                                      | 0.426         | 1.010 (0.943-1.083)                                                                                                       | 1.049 (0.935-1.176)                                                                                                       | 0.386         | 0.992 (0.922-1.066)                                                                                                       | 1.123 (0.980-1.286)                                                                                                       | 0.006         | Mean Systolic Blood Pressure continuous (per 10mmHg increase)                                                                 |
| 0.927 (0.795-1.081)                                                                                                       | 0.052         | 1.031 (0.899-1.182)                                                                                                       | 1.034 (0.891-1.200)                                                                                                      | 0.944         | 1.047 (0.932-1.176)                                                                                                       | 0.979 (0.802-1.194)                                                                                                       | 0.883         | 1.018 (0.905-1.147)                                                                                                       | 1.000 (0.768-1.301)                                                                                                       | 0.141         | Mean Diastolic Blood Pressure continuous (per 10mmHg increase)                                                                |
| 0.957 (0.839-1.091)                                                                                                       | 0.084         | 1.021 (0.905-1.153)                                                                                                       | 1.048 (0.921-1.194)                                                                                                      | 0.662         | 1.032 (0.931-1.143)                                                                                                       | 1.025 (0.862-1.219)                                                                                                       | 0.723         | 1.004 (0.903-1.116)                                                                                                       | 1.103 (0.884-1.377)                                                                                                       | 0.023         | Mean Blood Pressure (1/3SBP+2/3DBP) continuous (per 10mmHg increase)                                                          |
| 1 (referent)<br>0.95 (0.59-1.53)<br>1.17 (0.74-1.85)<br>0.90 (0.56-1.44)<br>1.20 (0.66-2.16)<br>0.24 (0.03-1.74)<br>0.744 | 0.357         | 1 (referent)<br>0.72 (0.49-1.06)<br>0.86 (0.58-1.29)<br>0.94 (0.62-1.41)<br>1.15 (0.64-2.10)<br>0.32 (0.04-2.36)<br>0.879 | 1 (referent)<br>1.77 (1.21-2.60)<br>1.34 (0.85-2.11)<br>1.25 (0.77-2.03)<br>1.79 (0.93-3.46)<br>no cases<br>0.556        | 0.442         | 1 (referent)<br>1.06 (0.79-1.44)<br>0.99 (0.70-1.39)<br>0.99 (0.69-1.43)<br>1.32 (0.79-2.21)<br>no cases<br>0.878         | 1 (referent)<br>1.34 (0.77-2.33)<br>1.27 (0.69-2.32)<br>1.23 (0.66-2.30)<br>1.56 (0.66-3.68)<br>0.79 (0.10-6.08)<br>0.529 | 0.36          | 1 (referent)<br>1.16 (0.88-1.53)<br>1.04 (0.75-1.44)<br>0.97 (0.67-1.40)<br>0.99 (0.52-1.89)<br>no cases<br>0.615         | 1 (referent)<br>0.77 (0.20-2.96)<br>1.28 (0.39-4.16)<br>1.19 (0.38-3.77)<br>2.87 (0.88-9.35)<br>0.50 (0.05-4.69)<br>0.121 | 0.006         | ESH classification<br>< 120<br>120-129<br>130-139<br>140-159<br>160-179<br>>= 180<br>p-trend                                  |
| 1 (referent)<br>0.75 (0.49-1.14)<br>0.79 (0.49-1.26)<br>0.79 (0.51-1.23)<br>0.88 (0.43-1.79)<br>0.80 (0.19-3.32)<br>0.355 | 0.128         | 1 (referent)<br>0.88 (0.61-1.27)<br>0.82 (0.52-1.28)<br>0.86 (0.56-1.33)<br>1.56 (0.86-2.86)<br>1.87 (0.67-5.24)<br>0.672 | 1 (referent)<br>0.91 (0.62-1.35)<br>0.92 (0.58-1.48)<br>1.15 (0.75-1.76)<br>0.43 (0.13-1.38)<br>1.25 (0.30-5.16)<br>0.86 | 0.684         | 1 (referent)<br>0.91 (0.67-1.23)<br>0.85 (0.58-1.24)<br>0.95 (0.66-1.36)<br>1.31 (0.75-2.31)<br>1.20 (0.38-3.80)<br>0.908 | 1 (referent)<br>0.95 (0.57-1.61)<br>0.89 (0.47-1.65)<br>1.07 (0.61-1.88)<br>0.42 (0.10-1.76)<br>2.34 (0.70-7.81)<br>0.973 | 0.813         | 1 (referent)<br>1.00 (0.76-1.33)<br>1.00 (0.70-1.43)<br>0.88 (0.60-1.29)<br>0.94 (0.44-2.03)<br>2.66 (0.97-7.31)<br>0.979 | 1 (referent)<br>0.56 (0.22-1.44)<br>0.37 (0.13-1.07)<br>0.91 (0.43-1.91)<br>0.71 (0.27-1.88)<br>0.91 (0.20-4.20)<br>0.977 | 0.079         | Diastolic Blood Pressure (mmHg)<br>ESH classification<br>< 80<br>80-84<br>85-89<br>90-99<br>100-109<br>>= 110<br>p-trend      |
| 1 (referent)<br>1.06 (0.70-1.59)<br>0.90 (0.56-1.44)<br>0.99 (0.55-1.78)<br>0.714                                         | 0.185         | 1 (referent)<br>0.78 (0.57-1.08)<br>0.93 (0.62-1.40)<br>0.99 (0.55-1.78)<br>0.806                                         | 1 (referent)<br>1.60 (1.12-2.29)<br>1.28 (0.79-2.07)<br>1.46 (0.76-2.83)<br>0.214                                        | 0.212         | 1 (referent)<br>1.03 (0.79-1.35)<br>1.00 (0.70-1.44)<br>1.07 (0.64-1.79)<br>0.862                                         | 1 (referent)<br>1.31 (0.79-2.17)<br>1.24 (0.67-2.31)<br>1.42 (0.62-3.25)<br>0.426                                         | 0.362         | 1 (referent)<br>1.11 (0.87-1.43)<br>0.98 (0.68-1.41)<br>0.84 (0.44-1.60)<br>0.828                                         | 1 (referent)<br>1.06 (0.34-3.29)<br>1.18 (0.37-3.73)<br>2.23 (0.69-7.20)<br>0.061                                         | 0.006         | Systolic Blood Pressure (mmHg)<br>ASH classification<br>< 120<br>120-139<br>140-159<br>>= 160<br>p-trend                      |
| 1 (referent)<br>0.77 (0.54-1.10)<br>0.79 (0.51-1.23)<br>0.87 (0.45-1.67)<br>0.323                                         | 0.107         | 1 (referent)<br>0.86 (0.63-1.18)<br>0.86 (0.56-1.33)<br>1.63 (0.95-2.80)<br>0.597                                         | 1 (referent)<br>0.92 (0.65-1.29)<br>1.15 (0.74-1.76)<br>0.58 (0.23-1.46)<br>0.731                                        | 0.564         | 1 (referent)<br>0.89 (0.68-1.16)<br>0.95 (0.66-1.37)<br>1.29 (0.77-2.18)<br>0.827                                         | 1 (referent)<br>0.93 (0.59-1.47)<br>1.07 (0.61-1.89)<br>0.83 (0.32-2.15)<br>0.917                                         | 0.934         | 1 (referent)<br>1.00 (0.78-1.28)<br>0.88 (0.60-1.29)<br>1.23 (0.66-2.29)<br>0.928                                         | 1 (referent)<br>0.46 (0.21-1.05)<br>0.91 (0.43-1.93)<br>0.75 (0.30-1.86)<br>0.897                                         | 0.08          | Diastolic Blood Pressure (mmHg)<br>ASH classification<br>< 80<br>80-89<br>90-99<br>>= 100<br>p-trend                          |
| 1 (referent)<br>0.65 (0.41-1.03)<br>0.71 (0.46-1.11)<br>0.80 (0.51-1.25)<br>0.552                                         | 0.113         | 1 (referent)<br>0.86 (0.59-1.24)<br>0.91 (0.62-1.34)<br>1.04 (0.69-1.58)<br>0.857                                         | 1 (referent)<br>1.32 (0.89-1.95)<br>1.12 (0.72-1.74)<br>1.38 (0.87-2.20)<br>0.294                                        | 0.438         | 1 (referent)<br>1.08 (0.80-1.45)<br>0.93 (0.67-1.31)<br>1.11 (0.78-1.59)<br>0.797                                         | 1 (referent)<br>0.98 (0.55-1.75)<br>1.09 (0.61-1.95)<br>1.28 (0.69-2.37)<br>0.378                                         | 0.35          | 1 (referent)<br>1.07 (0.81-1.41)<br>0.98 (0.72-1.35)<br>0.97 (0.67-1.41)<br>0.813                                         | 1 (referent)<br>0.52 (0.13-2.05)<br>0.65 (0.20-2.13)<br>1.08 (0.35-3.35)<br>0.216                                         | 0.017         | Mean BP (mmHg) (1/3SBP+2/3DBP)<br>Cohort-specific quartiles<br>50.0-88.3<br>88.5-96.6<br>96.8-105.5<br>105.6-216.6<br>p-trend |
| 1 (referent)<br>1.00 (0.73-1.37)                                                                                          | 0.543         | 1 (referent)<br>1.04 (0.78-1.40)                                                                                          | 1 (referent)<br>1.07 (0.78-1.47)                                                                                         | 0.75          | 1 (referent)<br>1.05 (0.81-1.35)                                                                                          | 1 (referent)<br>1.03 (0.68-1.57)                                                                                          | 0.813         | -<br>1 (referent)                                                                                                         | -<br>1.22 (0.85-1.75)                                                                                                     |               | Hypertension (SBP >= 140 mmHg,<br>or DBP >= 90 mmHg, or self-reported)<br>Normotensive<br>Hypertensive                        |

| Leukemia                                                                         |        | Excluding first 2 years of follow-up |                     |                     | Men                 | Women               | Sex                 | BMI <= 25 mg/m <sup>2</sup> | BMI > 25 mg/m <sup>2</sup> | BMI                 | Age <= 53 yrs |                     |
|----------------------------------------------------------------------------------|--------|--------------------------------------|---------------------|---------------------|---------------------|---------------------|---------------------|-----------------------------|----------------------------|---------------------|---------------|---------------------|
| Cases                                                                            | Cohort | HR (crude)                           | HR (adjusted)       | HR (adjusted)       | HR (adjusted)       | HR (adjusted)       | p-interaction       | HR (adjusted)               | HR (adjusted)              | p-interaction       | HR (adjusted) |                     |
| Cases                                                                            |        | 1308                                 | 1308                | 1179                | 667                 | 641                 |                     | 533                         | 775                        |                     | 366           |                     |
| Cohort size                                                                      |        | 307318                               | 307318              | 301857              | 112591              | 194727              |                     | 146326                      | 160992                     |                     | 153303        |                     |
| <b>Mean Systolic Blood Pressure continuous (per 10mmHg increase)</b>             | 1308   | 307318                               | 1.006 (0.977-1.036) | 0.986 (0.956-1.017) | 0.992 (0.960-1.025) | 1.004 (0.961-1.050) | 0.968 (0.927-1.012) | 0.21                        | 0.978 (0.931-1.027)        | 0.996 (0.957-1.036) | 0.888         | 0.983 (0.918-1.053) |
| <b>Mean Diastolic Blood Pressure continuous (per 10mmHg increase)</b>            | 1308   | 307318                               | 1.021 (0.969-1.076) | 0.972 (0.920-1.028) | 0.985 (0.929-1.044) | 0.980 (0.906-1.059) | 0.965 (0.892-1.045) | 0.639                       | 0.937 (0.858-1.024)        | 1.004 (0.936-1.077) | 0.486         | 0.960 (0.861-1.071) |
| <b>Mean Blood Pressure (1/3SBP+2/3DBP) continuous (per 10mmHg increase)</b>      | 1308   | 307318                               | 1.015 (0.970-1.061) | 0.976 (0.930-1.023) | 0.986 (0.938-1.037) | 0.993 (0.928-1.062) | 0.958 (0.896-1.025) | 0.362                       | 0.952 (0.883-1.027)        | 0.999 (0.941-1.061) | 0.757         | 0.967 (0.877-1.067) |
| <b>Systolic Blood Pressure (mmHg) ESH classification</b>                         |        |                                      |                     |                     |                     |                     |                     |                             |                            |                     |               |                     |
| < 120                                                                            | 241    | 86141                                | 1 (referent)                | 1 (referent)               | 1 (referent)        | 1 (referent)  | 1 (referent)        |
| 120-129                                                                          | 247    | 66446                                | 1.01 (0.85-1.21)    | 0.94 (0.78-1.12)    | 1.01 (0.83-1.22)    | 1.12 (0.84-1.48)    | 0.84 (0.66-1.07)    | 0.92 (0.72-1.18)            | 0.97 (0.74-1.27)           |                     |               | 1.18 (0.89-1.55)    |
| 130-139                                                                          | 270    | 57482                                | 1.11 (0.93-1.33)    | 1.00 (0.83-1.20)    | 1.00 (0.83-1.22)    | 1.19 (0.90-1.58)    | 0.90 (0.70-1.15)    | 0.85 (0.65-1.11)            | 1.16 (0.89-1.50)           |                     |               | 1.02 (0.74-1.40)    |
| 140-159                                                                          | 375    | 68235                                | 1.09 (0.91-1.29)    | 0.96 (0.81-1.15)    | 1.02 (0.84-1.23)    | 1.15 (0.87-1.51)    | 0.86 (0.67-1.09)    | 0.91 (0.63-1.06)            | 1.13 (0.88-1.44)           | 0.606               |               | 1.07 (0.77-1.48)    |
| 160-179                                                                          | 134    | 22656                                | 1.04 (0.83-1.30)    | 0.92 (0.73-1.16)    | 0.92 (0.73-1.16)    | 1.14 (0.81-1.59)    | 0.78 (0.56-1.07)    | 0.91 (0.63-1.30)            | 1.00 (0.74-1.36)           |                     |               | 0.75 (0.39-1.42)    |
| >= 180                                                                           | 41     | 6358                                 | 1.12 (0.79-1.57)    | 0.99 (0.70-1.39)    | 1.02 (0.70-1.47)    | 1.28 (0.79-2.05)    | 0.78 (0.47-1.32)    | 0.99 (0.55-1.79)            | 1.07 (0.69-1.66)           |                     |               | 1.56 (0.62-3.89)    |
| p-trend                                                                          |        |                                      | 0.361               | 0.715               | 0.971               | 0.367               | 0.161               | 0.267                       | 0.511                      |                     |               | 0.915               |
| <b>Diastolic Blood Pressure (mmHg) ESH classification</b>                        |        |                                      |                     |                     |                     |                     |                     |                             |                            |                     |               |                     |
| < 80                                                                             | 479    | 132590                               | 1 (referent)                | 1 (referent)               |                     |               | 1 (referent)        |
| 80-84                                                                            | 288    | 64872                                | 1.00 (0.86-1.16)    | 0.94 (0.81-1.09)    | 0.96 (0.82-1.12)    | 0.98 (0.79-1.21)    | 0.90 (0.73-1.11)    | 0.89 (0.71-1.12)            | 1.00 (0.82-1.23)           |                     |               | 0.93 (0.71-1.23)    |
| 85-89                                                                            | 183    | 41500                                | 0.94 (0.80-1.12)    | 0.87 (0.73-1.03)    | 0.91 (0.75-1.09)    | 0.80 (0.62-1.03)    | 0.96 (0.75-1.22)    | 0.80 (0.60-1.07)            | 0.94 (0.75-1.17)           |                     |               | 0.74 (0.52-1.06)    |
| 90-99                                                                            | 262    | 51196                                | 1.03 (0.89-1.21)    | 0.92 (0.79-1.08)    | 0.98 (0.83-1.16)    | 0.85 (0.68-1.07)    | 1.02 (0.81-1.28)    | 0.82 (0.63-1.07)            | 1.02 (0.83-1.24)           | 0.583               |               | 0.92 (0.67-1.26)    |
| 100-109                                                                          | 84     | 13896                                | 1.19 (0.94-1.51)    | 1.03 (0.81-1.31)    | 1.03 (0.79-1.33)    | 1.14 (0.84-1.54)    | 0.81 (0.53-1.25)    | 1.19 (0.79-1.79)            | 1.03 (0.77-1.39)           |                     |               | 1.14 (0.69-1.87)    |
| >= 110                                                                           | 12     | 3264                                 | 0.77 (0.43-1.36)    | 0.64 (0.36-1.15)    | 0.74 (0.42-1.32)    | 0.61 (0.30-1.25)    | 0.68 (0.25-1.84)    | 0.25 (0.04-1.80)            | 0.80 (0.44-1.48)           |                     |               | 0.77 (0.24-2.45)    |
| p-trend                                                                          |        |                                      | 0.565               | 0.285               | 0.672               | 0.303               | 0.621               | 0.195                       | 0.92                       |                     |               | 0.586               |
| <b>Systolic Blood Pressure (mmHg) ASH classification</b>                         |        |                                      |                     |                     |                     |                     |                     |                             |                            |                     |               |                     |
| < 120                                                                            | 241    | 86141                                | 1 (referent)                | 1 (referent)               |                     |               | 1 (referent)        |
| 120-139                                                                          | 517    | 123928                               | 1.06 (0.91-1.24)    | 0.97 (0.83-1.13)    | 1.01 (0.85-1.19)    | 1.15 (0.89-1.49)    | 0.87 (0.70-1.07)    | 0.89 (0.71-1.10)            | 1.07 (0.84-1.35)           |                     |               | 1.11 (0.86-1.43)    |
| 140-159                                                                          | 375    | 68235                                | 1.08 (0.91-1.28)    | 0.96 (0.80-1.14)    | 1.02 (0.84-1.23)    | 1.14 (0.87-1.50)    | 0.85 (0.67-1.08)    | 0.81 (0.63-1.06)            | 1.12 (0.87-1.43)           | 0.848               |               | 1.08 (0.77-1.49)    |
| >= 160                                                                           | 175    | 29014                                | 1.05 (0.86-1.30)    | 0.93 (0.75-1.15)    | 0.99 (0.79-1.25)    | 1.16 (0.85-1.60)    | 0.78 (0.57-1.05)    | 0.93 (0.67-1.29)            | 1.01 (0.76-1.35)           |                     |               | 0.90 (0.52-1.56)    |
| p-trend                                                                          |        |                                      | 0.543               | 0.529               | 0.984               | 0.481               | 0.109               | 0.324                       | 0.848                      |                     |               | 0.957               |
| <b>Diastolic Blood Pressure (mmHg) ASH classification</b>                        |        |                                      |                     |                     |                     |                     |                     |                             |                            |                     |               |                     |
| < 80                                                                             | 479    | 132590                               | 1 (referent)                | 1 (referent)               |                     |               | 1 (referent)        |
| 80-89                                                                            | 471    | 106372                               | 0.98 (0.86-1.11)    | 0.91 (0.80-1.04)    | 0.94 (0.81-1.08)    | 0.90 (0.75-1.09)    | 0.92 (0.77-1.11)    | 0.86 (0.70-1.04)            | 0.98 (0.82-1.17)           |                     |               | 0.86 (0.68-1.10)    |
| 90-99                                                                            | 262    | 51196                                | 1.03 (0.89-1.21)    | 0.93 (0.79-1.08)    | 0.98 (0.83-1.16)    | 0.85 (0.68-1.07)    | 1.02 (0.81-1.28)    | 0.82 (0.63-1.07)            | 1.02 (0.83-1.24)           | 0.642               |               | 0.92 (0.67-1.27)    |
| >= 100                                                                           | 96     | 17160                                | 1.11 (0.89-1.39)    | 0.96 (0.76-1.21)    | 0.97 (0.76-1.24)    | 1.04 (0.78-1.38)    | 0.79 (0.53-1.18)    | 1.04 (0.70-1.57)            | 0.99 (0.75-1.30)           |                     |               | 1.08 (0.67-1.71)    |
| p-trend                                                                          |        |                                      | 0.392               | 0.441               | 0.808               | 0.64                | 0.506               | 0.296                       | 0.933                      |                     |               | 0.808               |
| <b>Mean BP (mmHg) (1/3SBP+2/3DBP) Cohort-specific quartiles</b>                  |        |                                      |                     |                     |                     |                     |                     |                             |                            |                     |               |                     |
| 50.0-88.3                                                                        | 231    | 76991                                | 1 (referent)                | 1 (referent)               |                     |               | 1 (referent)        |
| 88.5-96.6                                                                        | 318    | 77727                                | 1.06 (0.89-1.25)    | 0.98 (0.82-1.16)    | 0.97 (0.81-1.16)    | 0.98 (0.75-1.28)    | 0.99 (0.79-1.24)    | 0.98 (0.78-1.24)            | 0.99 (0.76-1.29)           |                     |               | 0.87 (0.66-1.15)    |
| 96.8-105.5                                                                       | 346    | 76327                                | 1.01 (0.85-1.20)    | 0.90 (0.76-1.07)    | 0.89 (0.74-1.07)    | 0.99 (0.76-1.29)    | 0.83 (0.65-1.05)    | 0.82 (0.64-1.06)            | 0.99 (0.77-1.27)           | 0.599               |               | 0.84 (0.62-1.15)    |
| 105.6-216.6                                                                      | 413    | 76273                                | 1.03 (0.87-1.22)    | 0.89 (0.74-1.06)    | 0.91 (0.76-1.10)    | 0.88 (0.67-1.15)    | 0.91 (0.72-1.16)    | 0.83 (0.64-1.08)            | 0.97 (0.76-1.25)           |                     |               | 0.92 (0.66-1.28)    |
| p-trend                                                                          |        |                                      | 0.906               | 0.123               | 0.258               | 0.278               | 0.279               | 0.076                       | 0.809                      |                     |               | 0.574               |
| <b>Hypertension (SBP &gt;= 140 mmHg, or DBP &gt;= 90 mmHg, or self-reported)</b> |        |                                      |                     |                     |                     |                     |                     |                             |                            |                     |               |                     |
| Normotensive                                                                     | 613    | 174179                               | 1 (referent)                | 1 (referent)               |                     |               | 1 (referent)        |
| Hypertensive                                                                     | 695    | 133139                               | 1.06 (0.95-1.19)    | 1.01 (0.90-1.13)    | 1.03 (0.91-1.17)    | 1.08 (0.92-1.28)    | 0.94 (0.80-1.11)    | 0.90 (0.75-1.08)            | 1.11 (0.95-1.29)           | 0.198               |               | 1.09 (0.87-1.37)    |

| Age > 53 yrs                                                                                                              | Age           | Never smokers                                                                                                             | Ever smokers                                                                                                              | Smoking       | Alcohol <= 12g                                                                                                            | Alcohol > 12g                                                                                                             | Alcohol       | No antihypertensive treatment                                                                                             | Antihypertensive treatment                                                                                                | Treatment     | Leukemia                                                                                                                    |
|---------------------------------------------------------------------------------------------------------------------------|---------------|---------------------------------------------------------------------------------------------------------------------------|---------------------------------------------------------------------------------------------------------------------------|---------------|---------------------------------------------------------------------------------------------------------------------------|---------------------------------------------------------------------------------------------------------------------------|---------------|---------------------------------------------------------------------------------------------------------------------------|---------------------------------------------------------------------------------------------------------------------------|---------------|-----------------------------------------------------------------------------------------------------------------------------|
| HR (adjusted)                                                                                                             | p-interaction | HR (adjusted)                                                                                                             | HR (adjusted)                                                                                                             | p-interaction | HR (adjusted)                                                                                                             | HR (adjusted)                                                                                                             | p-interaction | HR (adjusted)                                                                                                             | HR (adjusted)                                                                                                             | p-interaction |                                                                                                                             |
| 942<br>154015                                                                                                             |               | 538<br>141931                                                                                                             | 754<br>160623                                                                                                             |               | 817<br>205214                                                                                                             | 491<br>102104                                                                                                             |               | 867<br>227336                                                                                                             | 205<br>37017                                                                                                              |               | Cases<br>Cohort size                                                                                                        |
| 0.988 (0.954-1.023)                                                                                                       | 0.991         | 0.972 (0.926-1.021)                                                                                                       | 0.994 (0.954-1.035)                                                                                                       | 0.759         | 0.981 (0.944-1.021)                                                                                                       | 0.996 (0.947-1.048)                                                                                                       | 0.784         | 0.969 (0.930-1.010)                                                                                                       | 0.959 (0.889-1.035)                                                                                                       | 0.898         | Mean Systolic Blood Pressure continuous (per 10mmHg increase)                                                               |
| 0.978 (0.917-1.044)                                                                                                       | 0.926         | 0.971 (0.890-1.060)                                                                                                       | 0.977 (0.908-1.050)                                                                                                       | 0.882         | 0.983 (0.917-1.054)                                                                                                       | 0.964 (0.880-1.057)                                                                                                       | 0.343         | 0.934 (0.868-1.005)                                                                                                       | 0.939 (0.814-1.083)                                                                                                       | 0.861         | Mean Diastolic Blood Pressure continuous (per 10mmHg increase)                                                              |
| 0.980 (0.928-1.035)                                                                                                       | 0.955         | 0.964 (0.895-1.040)                                                                                                       | 0.984 (0.924-1.047)                                                                                                       | 0.806         | 0.977 (0.920-1.038)                                                                                                       | 0.980 (0.906-1.059)                                                                                                       | 0.502         | 0.943 (0.885-1.004)                                                                                                       | 0.934 (0.826-1.057)                                                                                                       | 0.988         | Mean Blood Pressure (1/3SBP+2/3DBP) continuous (per 10mmHg increase)                                                        |
| 1 (referent)<br>0.81 (0.64-1.02)<br>0.96 (0.77-1.21)<br>0.90 (0.73-1.12)<br>0.90 (0.69-1.16)<br>0.90 (0.61-1.31)<br>0.768 | 0.849         | 1 (referent)<br>0.84 (0.63-1.11)<br>0.87 (0.65-1.15)<br>0.91 (0.69-1.19)<br>0.77 (0.53-1.10)<br>1.04 (0.62-1.73)<br>0.558 | 1 (referent)<br>1.03 (0.81-1.32)<br>1.12 (0.88-1.42)<br>0.99 (0.78-1.26)<br>1.07 (0.79-1.44)<br>0.96 (0.60-1.53)<br>0.981 | 0.964         | 1 (referent)<br>0.81 (0.65-1.02)<br>0.93 (0.74-1.16)<br>0.89 (0.72-1.11)<br>0.85 (0.64-1.13)<br>0.98 (0.64-1.51)<br>0.634 | 1 (referent)<br>1.22 (0.89-1.66)<br>1.17 (0.85-1.61)<br>1.12 (0.83-1.53)<br>1.09 (0.74-1.61)<br>1.08 (0.60-1.92)<br>0.92  | 0.777         | 1 (referent)<br>0.89 (0.73-1.09)<br>0.98 (0.79-1.20)<br>0.85 (0.69-1.06)<br>0.93 (0.69-1.26)<br>0.92 (0.54-1.55)<br>0.385 | 1 (referent)<br>0.69 (0.33-1.48)<br>0.77 (0.39-1.54)<br>0.77 (0.40-1.48)<br>0.63 (0.31-1.25)<br>0.64 (0.29-1.44)<br>0.289 | 0.541         | Systolic Blood Pressure (mmHg) ESH classification<br>< 120<br>120-129<br>130-139<br>140-159<br>160-179<br>>= 180<br>p-trend |
| 1 (referent)<br>0.95 (0.79-1.14)<br>0.92 (0.75-1.12)<br>0.93 (0.77-1.12)<br>1.02 (0.77-1.34)<br>0.61 (0.31-1.19)<br>0.382 | 0.881         | 1 (referent)<br>0.94 (0.74-1.18)<br>0.93 (0.71-1.21)<br>0.93 (0.72-1.19)<br>1.04 (0.71-1.52)<br>0.71 (0.29-1.74)<br>0.626 | 1 (referent)<br>0.93 (0.77-1.14)<br>0.81 (0.64-1.02)<br>0.92 (0.75-1.13)<br>1.05 (0.77-1.43)<br>0.61 (0.29-1.31)<br>0.367 | 0.869         | 1 (referent)<br>0.87 (0.72-1.06)<br>1.01 (0.82-1.24)<br>0.91 (0.74-1.11)<br>1.19 (0.88-1.60)<br>0.65 (0.31-1.39)<br>0.894 | 1 (referent)<br>1.06 (0.83-1.34)<br>0.66 (0.49-0.91)<br>0.96 (0.75-1.24)<br>0.86 (0.57-1.28)<br>0.65 (0.27-1.60)<br>0.173 | 0.155         | 1 (referent)<br>0.89 (0.75-1.06)<br>0.75 (0.60-0.94)<br>0.90 (0.73-1.10)<br>1.01 (0.71-1.44)<br>0.43 (0.14-1.33)<br>0.116 | 1 (referent)<br>0.85 (0.52-1.40)<br>0.95 (0.59-1.54)<br>0.86 (0.55-1.34)<br>0.83 (0.49-1.42)<br>0.35 (0.11-1.15)<br>0.244 | 0.817         | Diastolic Blood Pressure (mmHg) ESH classification<br>< 80<br>80-84<br>85-89<br>90-99<br>100-109<br>>= 110<br>p-trend       |
| 1 (referent)<br>0.89 (0.73-1.09)<br>0.90 (0.73-1.11)<br>0.89 (0.70-1.14)<br>0.498                                         | 0.629         | 1 (referent)<br>0.85 (0.67-1.09)<br>0.91 (0.69-1.18)<br>0.82 (0.59-1.14)<br>0.407                                         | 1 (referent)<br>1.08 (0.87-1.33)<br>0.99 (0.78-1.25)<br>1.04 (0.78-1.38)<br>0.885                                         | 0.897         | 1 (referent)<br>0.87 (0.72-1.05)<br>0.89 (0.72-1.10)<br>0.87 (0.67-1.14)<br>0.391                                         | 1 (referent)<br>1.19 (0.90-1.58)<br>1.12 (0.83-1.53)<br>1.09 (0.76-1.57)<br>0.885                                         | 0.987         | 1 (referent)<br>0.93 (0.78-1.11)<br>0.85 (0.69-1.05)<br>0.93 (0.70-1.22)<br>0.277                                         | 1 (referent)<br>0.74 (0.38-1.43)<br>0.77 (0.40-1.48)<br>0.63 (0.32-1.24)<br>0.225                                         | 0.547         | Systolic Blood Pressure (mmHg) ASH classification<br>< 120<br>120-139<br>140-159<br>>= 160<br>p-trend                       |
| 1 (referent)<br>0.94 (0.80-1.09)<br>0.93 (0.77-1.12)<br>0.94 (0.72-1.22)<br>0.485                                         | 0.745         | 1 (referent)<br>0.93 (0.76-1.14)<br>0.93 (0.72-1.19)<br>0.98 (0.68-1.41)<br>0.68                                          | 1 (referent)<br>0.88 (0.74-1.05)<br>0.92 (0.75-1.13)<br>0.97 (0.72-1.30)<br>0.58                                          | 0.999         | 1 (referent)<br>0.93 (0.79-1.09)<br>0.91 (0.74-1.11)<br>1.08 (0.81-1.44)<br>0.808                                         | 1 (referent)<br>0.90 (0.72-1.12)<br>0.97 (0.75-1.25)<br>0.82 (0.56-1.21)<br>0.465                                         | 0.409         | 1 (referent)<br>0.84 (0.72-0.98)<br>0.90 (0.73-1.10)<br>0.92 (0.65-1.29)<br>0.221                                         | 1 (referent)<br>0.90 (0.59-1.38)<br>0.86 (0.55-1.34)<br>0.73 (0.44-1.24)<br>0.25                                          | 0.703         | Diastolic Blood Pressure (mmHg) ASH classification<br>< 80<br>80-89<br>90-99<br>>= 100<br>p-trend                           |
| 1 (referent)<br>1.06 (0.85-1.32)<br>0.94 (0.76-1.18)<br>0.91 (0.73-1.13)<br>0.16                                          | 0.693         | 1 (referent)<br>0.93 (0.72-1.22)<br>0.82 (0.63-1.08)<br>0.85 (0.64-1.11)<br>0.178                                         | 1 (referent)<br>1.02 (0.81-1.28)<br>0.95 (0.75-1.20)<br>0.92 (0.73-1.17)<br>0.374                                         | 0.763         | 1 (referent)<br>0.90 (0.73-1.11)<br>0.80 (0.64-0.99)<br>0.87 (0.70-1.08)<br>0.181                                         | 1 (referent)<br>1.15 (0.85-1.57)<br>1.15 (0.84-1.56)<br>0.97 (0.71-1.34)<br>0.526                                         | 0.657         | 1 (referent)<br>0.96 (0.79-1.17)<br>0.87 (0.71-1.07)<br>0.83 (0.67-1.03)<br>0.059                                         | 1 (referent)<br>0.94 (0.42-2.11)<br>0.86 (0.41-1.84)<br>0.79 (0.38-1.64)<br>0.329                                         | 0.852         | Mean BP (mmHg) (1/3SBP+2/3DBP) Cohort-specific quartiles<br>50.0-88.3<br>88.5-96.6<br>96.8-105.5<br>105.6-216.6<br>p-trend  |
| 1 (referent)<br>0.98 (0.86-1.12)                                                                                          | 0.335         | 1 (referent)<br>1.00 (0.83-1.20)                                                                                          | 1 (referent)<br>0.99 (0.85-1.16)                                                                                          | 0.991         | 1 (referent)<br>1.02 (0.88-1.18)                                                                                          | 1 (referent)<br>1.00 (0.83-1.21)                                                                                          | 0.474         | -<br>1 (referent)                                                                                                         | -<br>1.14 (0.95-1.37)                                                                                                     |               | Hypertension (SBP >= 140 mmHg, or DBP >= 90 mmHg, or self-reported)<br>Normotensive<br>Hypertensive                         |

| Multiple Myeloma                                                                 |        | Excluding first 2 years of follow-up |                     |                     | Men                 | Women               | Sex                 | BMI <= 25 mg/m <sup>2</sup> | BMI > 25 mg/m <sup>2</sup> | BMI                 | Age <= 53 yrs |                     |
|----------------------------------------------------------------------------------|--------|--------------------------------------|---------------------|---------------------|---------------------|---------------------|---------------------|-----------------------------|----------------------------|---------------------|---------------|---------------------|
| Cases                                                                            | Cohort | HR (crude)                           | HR (adjusted)       | HR (adjusted)       | HR (adjusted)       | HR (adjusted)       | p-interaction       | HR (adjusted)               | HR (adjusted)              | p-interaction       | HR (adjusted) |                     |
| Cases                                                                            |        | 475                                  | 475                 | 434                 | 250                 | 225                 |                     | 191                         | 284                        |                     | 127           |                     |
| Cohort size                                                                      |        | 307318                               | 307318              | 301857              | 112591              | 194727              |                     | 146326                      | 160992                     |                     | 153303        |                     |
| <b>Mean Systolic Blood Pressure continuous (per 10mmHg increase)</b>             | 475    | 307318                               | 1.024 (0.976-1.075) | 0.995 (0.945-1.047) | 1.002 (0.949-1.057) | 1.004 (0.934-1.080) | 0.983 (0.914-1.058) | 0.537                       | 0.991 (0.912-1.076)        | 1.015 (0.951-1.083) | 0.431         | 1.028 (0.919-1.151) |
| <b>Mean Diastolic Blood Pressure continuous (per 10mmHg increase)</b>            | 475    | 307318                               | 1.079 (0.989-1.176) | 1.012 (0.923-1.109) | 1.029 (0.935-1.132) | 0.970 (0.854-1.102) | 1.059 (0.929-1.208) | 0.607                       | 1.006 (0.868-1.165)        | 1.050 (0.936-1.178) | 0.555         | 0.976 (0.811-1.173) |
| <b>Mean Blood Pressure (1/3SBP+2/3DBP) continuous (per 10mmHg increase)</b>      | 475    | 307318                               | 1.057 (0.982-1.138) | 1.002 (0.926-1.084) | 1.015 (0.935-1.102) | 0.988 (0.885-1.103) | 1.014 (0.907-1.135) | 0.967                       | 0.996 (0.878-1.129)        | 1.036 (0.939-1.144) | 0.457         | 1.006 (0.854-1.185) |
| <b>Systolic Blood Pressure (mmHg) ESH classification</b>                         |        |                                      |                     |                     |                     |                     |                     |                             |                            |                     |               |                     |
| < 120                                                                            | 79     | 86141                                | 1 (referent)        | 1 (referent)        | 1 (referent)        | 1 (referent)        |                     |                             | 1 (referent)               | 1 (referent)        |               | 1 (referent)        |
| 120-129                                                                          | 87     | 66446                                | 1.07 (0.78-1.45)    | 0.97 (0.71-1.32)    | 1.01 (0.73-1.39)    | 1.09 (0.68-1.77)    | 0.89 (0.59-1.35)    |                             | 1.02 (0.68-1.54)           | 0.98 (0.61-1.58)    |               | 1.57 (0.97-2.55)    |
| 130-139                                                                          | 108    | 57482                                | 1.32 (0.98-1.78)    | 1.16 (0.86-1.57)    | 1.10 (0.80-1.52)    | 1.34 (0.84-2.13)    | 1.04 (0.69-1.56)    |                             | 1.01 (0.65-1.57)           | 1.38 (0.89-2.14)    |               | 1.06 (0.59-1.88)    |
| 140-159                                                                          | 138    | 68235                                | 1.20 (0.90-1.61)    | 1.02 (0.75-1.37)    | 1.07 (0.78-1.46)    | 1.23 (0.78-1.95)    | 0.85 (0.56-1.28)    | 0.334                       | 1.05 (0.68-1.61)           | 1.14 (0.74-1.76)    | 0.19          | 1.56 (0.90-2.70)    |
| 160-179                                                                          | 44     | 22656                                | 1.04 (0.71-1.53)    | 0.87 (0.58-1.29)    | 0.93 (0.61-1.40)    | 0.93 (0.52-1.68)    | 0.84 (0.49-1.45)    |                             | 0.64 (0.30-1.33)           | 1.09 (0.65-1.83)    |               | 1.18 (0.44-3.15)    |
| >= 180                                                                           | 19     | 6358                                 | 1.58 (0.94-2.66)    | 1.32 (0.78-2.24)    | 1.40 (0.81-2.41)    | 1.59 (0.76-3.33)    | 1.14 (0.52-2.48)    |                             | 1.08 (0.38-3.08)           | 1.67 (0.87-3.19)    |               | 1.13 (0.15-8.49)    |
| p-trend                                                                          |        |                                      | 0.186               | 0.881               | 0.625               | 0.552               | 0.652               |                             | 0.68                       | 0.295               |               | 0.424               |
| <b>Diastolic Blood Pressure (mmHg) ESH classification</b>                        |        |                                      |                     |                     |                     |                     |                     |                             |                            |                     |               |                     |
| < 80                                                                             | 153    | 132590                               | 1 (referent)        |                             | 1 (referent)               | 1 (referent)        |               | 1 (referent)        |
| 80-84                                                                            | 108    | 64872                                | 1.15 (0.90-1.48)    | 1.07 (0.83-1.37)    | 1.12 (0.86-1.46)    | 1.16 (0.82-1.65)    | 0.94 (0.65-1.36)    |                             | 0.97 (0.66-1.41)           | 1.23 (0.87-1.74)    |               | 0.94 (0.60-1.49)    |
| 85-89                                                                            | 73     | 41500                                | 1.13 (0.85-1.50)    | 1.02 (0.77-1.36)    | 1.08 (0.80-1.46)    | 0.85 (0.56-1.29)    | 1.25 (0.85-1.85)    |                             | 0.91 (0.57-1.46)           | 1.18 (0.81-1.71)    |               | 0.69 (0.37-1.28)    |
| 90-99                                                                            | 97     | 51196                                | 1.15 (0.89-1.49)    | 1.00 (0.76-1.30)    | 1.07 (0.81-1.42)    | 0.89 (0.61-1.29)    | 1.15 (0.78-1.68)    | 0.577                       | 0.95 (0.61-1.48)           | 1.13 (0.80-1.60)    | 0.641         | 0.89 (0.52-1.51)    |
| 100-109                                                                          | 38     | 13896                                | 1.64 (1.14-2.35)    | 1.36 (0.94-1.96)    | 1.38 (0.93-2.04)    | 1.39 (0.87-2.23)    | 1.18 (0.62-2.23)    |                             | 1.61 (0.85-3.07)           | 1.45 (0.92-2.30)    |               | 1.12 (0.49-2.55)    |
| >= 110                                                                           | 6      | 3264                                 | 1.16 (0.51-2.63)    | 0.93 (0.41-2.13)    | 1.06 (0.46-2.42)    | 0.64 (0.20-2.05)    | 1.54 (0.48-4.92)    |                             | 0.87 (0.12-6.28)           | 1.12 (0.45-2.78)    |               | 0.69 (0.09-5.08)    |
| p-trend                                                                          |        |                                      | 0.045               | 0.525               | 0.311               | 0.808               | 0.238               |                             | 0.696                      | 0.309               |               | 0.62                |
| <b>Systolic Blood Pressure (mmHg) ASH classification</b>                         |        |                                      |                     |                     |                     |                     |                     |                             |                            |                     |               |                     |
| < 120                                                                            | 79     | 86141                                | 1 (referent)        |                             | 1 (referent)               | 1 (referent)        |               | 1 (referent)        |
| 120-139                                                                          | 195    | 123928                               | 1.19 (0.91-1.55)    | 1.06 (0.81-1.39)    | 1.05 (0.79-1.40)    | 1.21 (0.79-1.87)    | 0.96 (0.67-1.37)    |                             | 1.02 (0.71-1.46)           | 1.19 (0.79-1.80)    |               | 1.36 (0.86-2.14)    |
| 140-159                                                                          | 138    | 68235                                | 1.19 (0.89-1.59)    | 1.01 (0.75-1.36)    | 1.06 (0.78-1.45)    | 1.22 (0.77-1.93)    | 0.84 (0.56-1.27)    | 0.427                       | 1.05 (0.68-1.60)           | 1.13 (0.73-1.74)    | 0.301         | 1.59 (0.92-2.75)    |
| >= 160                                                                           | 63     | 29014                                | 1.15 (0.81-1.63)    | 0.96 (0.67-1.37)    | 1.02 (0.70-1.49)    | 1.06 (0.62-1.82)    | 0.90 (0.54-1.47)    |                             | 0.73 (0.38-1.38)           | 1.20 (0.74-1.95)    |               | 1.20 (0.48-2.99)    |
| p-trend                                                                          |        |                                      | 0.451               | 0.691               | 0.891               | 0.939               | 0.474               |                             | 0.583                      | 0.678               |               | 0.207               |
| <b>Diastolic Blood Pressure (mmHg) ASH classification</b>                        |        |                                      |                     |                     |                     |                     |                     |                             |                            |                     |               |                     |
| < 80                                                                             | 153    | 132590                               | 1 (referent)        |                             | 1 (referent)               | 1 (referent)        |               | 1 (referent)        |
| 80-89                                                                            | 181    | 106372                               | 1.14 (0.92-1.42)    | 1.05 (0.84-1.31)    | 1.10 (0.87-1.39)    | 1.03 (0.75-1.42)    | 1.06 (0.78-1.45)    |                             | 0.95 (0.68-1.32)           | 1.21 (0.89-1.64)    |               | 0.85 (0.56-1.29)    |
| 90-99                                                                            | 97     | 51196                                | 1.15 (0.89-1.49)    | 1.00 (0.76-1.31)    | 1.07 (0.81-1.42)    | 0.89 (0.61-1.30)    | 1.14 (0.78-1.68)    | 0.966                       | 0.95 (0.61-1.48)           | 1.13 (0.80-1.60)    | 0.64          | 0.89 (0.52-1.52)    |
| >= 100                                                                           | 44     | 17160                                | 1.55 (1.10-2.18)    | 1.28 (0.90-1.82)    | 1.32 (0.91-1.91)    | 1.25 (0.80-1.98)    | 1.23 (0.69-2.20)    |                             | 1.51 (0.81-2.80)           | 1.39 (0.90-2.14)    |               | 1.05 (0.48-2.28)    |
| p-trend                                                                          |        |                                      | 0.026               | 0.379               | 0.228               | 0.732               | 0.382               |                             | 0.588                      | 0.228               |               | 0.801               |
| <b>Mean BP (mmHg) (1/3SBP+2/3DBP) Cohort-specific quartiles</b>                  |        |                                      |                     |                     |                     |                     |                     |                             |                            |                     |               |                     |
| 50.0-88.3                                                                        | 73     | 76991                                | 1 (referent)        |                             | 1 (referent)               | 1 (referent)        |               | 1 (referent)        |
| 88.5-96.6                                                                        | 116    | 77727                                | 1.19 (0.89-1.60)    | 1.09 (0.81-1.47)    | 1.05 (0.76-1.43)    | 1.15 (0.72-1.83)    | 1.04 (0.70-1.55)    |                             | 1.35 (0.91-2.01)           | 0.90 (0.57-1.41)    |               | 1.10 (0.69-1.76)    |
| 96.8-105.5                                                                       | 125    | 76327                                | 1.12 (0.84-1.51)    | 0.97 (0.72-1.31)    | 0.96 (0.70-1.32)    | 1.10 (0.69-1.74)    | 0.86 (0.57-1.30)    | 0.996                       | 0.98 (0.63-1.53)           | 0.98 (0.64-1.50)    | 0.459         | 0.66 (0.37-1.16)    |
| 105.6-216.6                                                                      | 161    | 76273                                | 1.24 (0.93-1.66)    | 1.02 (0.75-1.38)    | 1.03 (0.75-1.41)    | 1.00 (0.63-1.59)    | 1.07 (0.71-1.61)    |                             | 1.08 (0.69-1.70)           | 1.03 (0.68-1.56)    |               | 1.01 (0.58-1.76)    |
| p-trend                                                                          |        |                                      | 0.227               | 0.847               | 0.998               | 0.687               | 0.923               |                             | 0.835                      | 0.616               |               | 0.562               |
| <b>Hypertension (SBP &gt;= 140 mmHg, or DBP &gt;= 90 mmHg, or self-reported)</b> |        |                                      |                     |                     |                     |                     |                     |                             |                            |                     |               |                     |
| Normotensive                                                                     | 221    | 174179                               | 1 (referent)        |                             | 1 (referent)               | 1 (referent)        |               | 1 (referent)        |
| Hypertensive                                                                     | 254    | 133139                               | 1.07 (0.89-1.30)    | 0.98 (0.81-1.19)    | 1.01 (0.83-1.24)    | 1.03 (0.79-1.35)    | 0.93 (0.70-1.23)    | 0.382                       | 0.91 (0.67-1.23)           | 1.10 (0.85-1.41)    | 0.214         | 1.06 (0.72-1.55)    |





| Lymphoma                                                             |        | Excluding first 2 years of follow-up |                     |                     | Men                 | Women               | Sex                 | BMI <= 25 mg/m <sup>2</sup> | BMI > 25 mg/m <sup>2</sup> | BMI                 | Age <= 53 yrs |                     |
|----------------------------------------------------------------------|--------|--------------------------------------|---------------------|---------------------|---------------------|---------------------|---------------------|-----------------------------|----------------------------|---------------------|---------------|---------------------|
| Cases                                                                | Cohort | HR (crude)                           | HR (adjusted)       | HR (adjusted)       | HR (adjusted)       | HR (adjusted)       | p-interaction       | HR (adjusted)               | HR (adjusted)              | p-interaction       | HR (adjusted) |                     |
| Cases                                                                |        | 1058                                 | 1058                | 981                 | 504                 | 554                 |                     | 470                         | 588                        |                     | 351           |                     |
| Cohort size                                                          |        | 307318                               | 307318              | 301857              | 112591              | 194727              |                     | 146326                      | 160992                     |                     | 153303        |                     |
| Mean Systolic Blood Pressure continuous (per 10mmHg increase)        | 1058   | 307318                               | 0.979 (0.947-1.012) | 0.965 (0.932-1.000) | 0.967 (0.933-1.003) | 0.958 (0.910-1.009) | 0.972 (0.927-1.019) | 0.676                       | 0.964 (0.914-1.017)        | 0.967 (0.925-1.012) | 0.72          | 1.000 (0.935-1.070) |
| Mean Diastolic Blood Pressure continuous (per 10mmHg increase)       | 1058   | 307318                               | 0.985 (0.929-1.045) | 0.956 (0.899-1.017) | 0.961 (0.902-1.025) | 0.921 (0.842-1.008) | 0.995 (0.914-1.083) | 0.137                       | 0.984 (0.896-1.080)        | 0.938 (0.865-1.017) | 0.427         | 1.003 (0.899-1.118) |
| Mean Blood Pressure (1/3SBP+2/3DBP) continuous (per 10mmHg increase) | 1058   | 307318                               | 0.977 (0.929-1.027) | 0.952 (0.903-1.004) | 0.956 (0.905-1.010) | 0.929 (0.860-1.005) | 0.975 (0.907-1.048) | 0.299                       | 0.965 (0.890-1.045)        | 0.945 (0.881-1.013) | 0.788         | 1.002 (0.909-1.103) |
| Systolic Blood Pressure (mmHg) ESH classification                    |        |                                      |                     |                     |                     |                     |                     |                             |                            |                     |               |                     |
| < 120                                                                | 218    | 86141                                | 1 (referent)                | 1 (referent)               | 1 (referent)        | 1 (referent)  | 1 (referent)        |
| 120-129                                                              | 197    | 66446                                | 0.88 (0.72-1.07)    | 0.84 (0.69-1.02)    | 0.83 (0.67-1.01)    | 0.93 (0.69-1.27)    | 0.77 (0.59-1.00)    | 0.74 (0.57-0.97)            | 0.97 (0.72-1.31)           | 0.87 (0.65-1.16)    |               | 0.87 (0.65-1.16)    |
| 130-139                                                              | 216    | 57482                                | 0.97 (0.80-1.17)    | 0.90 (0.74-1.10)    | 0.90 (0.73-1.10)    | 0.92 (0.68-1.24)    | 0.91 (0.70-1.18)    | 0.78 (0.59-1.03)            | 1.05 (0.78-1.40)           | 0.76 (0.54-1.05)    |               | 0.76 (0.54-1.05)    |
| 140-159                                                              | 285    | 68235                                | 0.88 (0.73-1.06)    | 0.82 (0.67-0.99)    | 0.81 (0.66-0.99)    | 0.87 (0.65-1.16)    | 0.79 (0.61-1.02)    | 0.85 (0.65-1.11)            | 0.85 (0.64-1.12)           | 0.81 (0.58-1.13)    | 0.818         | 0.81 (0.58-1.13)    |
| 160-179                                                              | 111    | 22656                                | 0.94 (0.74-1.19)    | 0.86 (0.67-1.10)    | 0.85 (0.66-1.10)    | 0.88 (0.61-1.27)    | 0.86 (0.61-1.21)    | 0.95 (0.65-1.39)            | 0.87 (0.62-1.22)           | 1.22 (0.76-1.97)    |               | 1.22 (0.76-1.97)    |
| >= 180                                                               | 31     | 6358                                 | 0.91 (0.62-1.34)    | 0.84 (0.57-1.24)    | 0.89 (0.59-1.32)    | 0.70 (0.38-1.28)    | 1.01 (0.61-1.69)    | 0.48 (0.19-1.19)            | 1.04 (0.66-1.65)           | 1.41 (0.61-3.26)    |               | 1.41 (0.61-3.26)    |
| p-trend                                                              |        |                                      | 0.47                | 0.152               | 0.185               | 0.242               | 0.418               | 0.333                       | 0.315                      | 0.776               |               | 0.776               |
| Diastolic Blood Pressure (mmHg) ESH classification                   |        |                                      |                     |                     |                     |                     |                     |                             |                            |                     |               |                     |
| < 80                                                                 | 376    | 132590                               | 1 (referent)                | 1 (referent)               | 1 (referent)        | 1 (referent)  | 1 (referent)        |
| 80-84                                                                | 229    | 64872                                | 1.03 (0.87-1.22)    | 1.00 (0.85-1.18)    | 1.03 (0.86-1.22)    | 0.95 (0.74-1.22)    | 1.04 (0.83-1.30)    | 1.00 (0.78-1.28)            | 0.98 (0.78-1.24)           | 1.12 (0.84-1.48)    |               | 1.12 (0.84-1.48)    |
| 85-89                                                                | 175    | 41500                                | 1.15 (0.96-1.38)    | 1.10 (0.92-1.32)    | 1.08 (0.89-1.30)    | 1.02 (0.78-1.34)    | 1.17 (0.91-1.51)    | 1.32 (1.01-1.73)            | 0.95 (0.74-1.22)           | 1.17 (0.84-1.62)    |               | 1.17 (0.84-1.62)    |
| 90-99                                                                | 222    | 51196                                | 1.12 (0.95-1.33)    | 1.06 (0.89-1.26)    | 1.07 (0.89-1.29)    | 1.02 (0.80-1.31)    | 1.09 (0.85-1.40)    | 1.17 (0.89-1.53)            | 0.98 (0.78-1.23)           | 1.10 (0.79-1.52)    | 0.202         | 1.10 (0.79-1.52)    |
| 100-109                                                              | 46     | 13896                                | 0.83 (0.61-1.13)    | 0.77 (0.56-1.05)    | 0.75 (0.54-1.05)    | 0.66 (0.43-1.02)    | 0.92 (0.59-1.46)    | 0.68 (0.37-1.26)            | 0.78 (0.54-1.13)           | 0.85 (0.47-1.56)    |               | 0.85 (0.47-1.56)    |
| >= 110                                                               | 10     | 3264                                 | 0.82 (0.43-1.53)    | 0.74 (0.39-1.39)    | 0.81 (0.43-1.53)    | 0.32 (0.10-1.02)    | 1.53 (0.72-3.26)    | 0.71 (0.17-2.85)            | 0.72 (0.36-1.47)           | 1.77 (0.77-4.06)    |               | 1.77 (0.77-4.06)    |
| p-trend                                                              |        |                                      | 0.717               | 0.647               | 0.68                | 0.18                | 0.399               | 0.503                       | 0.286                      | 0.52                |               | 0.52                |
| Systolic Blood Pressure (mmHg) ASH classification                    |        |                                      |                     |                     |                     |                     |                     |                             |                            |                     |               |                     |
| < 120                                                                | 218    | 86141                                | 1 (referent)                | 1 (referent)               | 1 (referent)        | 1 (referent)  | 1 (referent)        |
| 120-139                                                              | 413    | 123928                               | 0.92 (0.78-1.09)    | 0.87 (0.73-1.03)    | 0.86 (0.72-1.02)    | 0.93 (0.71-1.22)    | 0.84 (0.67-1.04)    | 0.76 (0.60-0.95)            | 1.01 (0.78-1.32)           | 0.82 (0.63-1.06)    |               | 0.82 (0.63-1.06)    |
| 140-159                                                              | 285    | 68235                                | 0.88 (0.73-1.06)    | 0.81 (0.67-0.99)    | 0.81 (0.66-0.98)    | 0.87 (0.65-1.17)    | 0.78 (0.60-1.01)    | 0.85 (0.65-1.11)            | 0.84 (0.64-1.12)           | 0.81 (0.58-1.13)    | 0.955         | 0.81 (0.58-1.13)    |
| >= 160                                                               | 142    | 29014                                | 0.93 (0.74-1.16)    | 0.85 (0.68-1.08)    | 0.85 (0.67-1.09)    | 0.84 (0.59-1.20)    | 0.89 (0.65-1.21)    | 0.86 (0.60-1.24)            | 0.91 (0.66-1.25)           | 1.27 (0.82-1.96)    |               | 1.27 (0.82-1.96)    |
| p-trend                                                              |        |                                      | 0.355               | 0.108               | 0.123               | 0.284               | 0.254               | 0.357                       | 0.202                      | 0.999               |               | 0.999               |
| Diastolic Blood Pressure (mmHg) ASH classification                   |        |                                      |                     |                     |                     |                     |                     |                             |                            |                     |               |                     |
| < 80                                                                 | 376    | 132590                               | 1 (referent)                | 1 (referent)               | 1 (referent)        | 1 (referent)  | 1 (referent)        |
| 80-89                                                                | 404    | 106372                               | 1.08 (0.94-1.25)    | 1.04 (0.90-1.20)    | 1.05 (0.90-1.22)    | 0.98 (0.79-1.22)    | 1.09 (0.90-1.32)    | 1.12 (0.91-1.38)            | 0.97 (0.79-1.19)           | 1.14 (0.89-1.45)    |               | 1.14 (0.89-1.45)    |
| 90-99                                                                | 222    | 51196                                | 1.12 (0.95-1.33)    | 1.06 (0.89-1.26)    | 1.07 (0.89-1.28)    | 1.02 (0.80-1.31)    | 1.09 (0.85-1.40)    | 1.16 (0.89-1.53)            | 0.98 (0.78-1.23)           | 1.09 (0.79-1.51)    | 0.345         | 1.09 (0.79-1.51)    |
| >= 100                                                               | 56     | 17160                                | 0.83 (0.62-1.10)    | 0.76 (0.57-1.02)    | 0.76 (0.56-1.03)    | 0.60 (0.39-0.90)    | 1.02 (0.68-1.53)    | 0.69 (0.39-1.21)            | 0.77 (0.55-1.08)           | 1.03 (0.62-1.71)    |               | 1.03 (0.62-1.71)    |
| p-trend                                                              |        |                                      | 0.965               | 0.436               | 0.526               | 0.127               | 0.567               | 0.855                       | 0.28                       | 0.619               |               | 0.619               |
| Mean BP (mmHg) (1/3SBP+2/3DBP) Cohort-specific quartiles             |        |                                      |                     |                     |                     |                     |                     |                             |                            |                     |               |                     |
| 50.0-88.3                                                            | 200    | 76991                                | 1 (referent)                | 1 (referent)               | 1 (referent)        | 1 (referent)  | 1 (referent)        |
| 88.5-96.6                                                            | 245    | 77727                                | 0.95 (0.78-1.14)    | 0.91 (0.75-1.10)    | 0.94 (0.77-1.14)    | 0.93 (0.69-1.26)    | 0.88 (0.69-1.13)    | 0.79 (0.61-1.02)            | 1.04 (0.78-1.39)           | 0.97 (0.73-1.30)    |               | 0.97 (0.73-1.30)    |
| 96.8-105.5                                                           | 283    | 76327                                | 0.96 (0.80-1.15)    | 0.90 (0.74-1.08)    | 0.91 (0.75-1.11)    | 0.86 (0.64-1.16)    | 0.94 (0.73-1.21)    | 0.98 (0.76-1.27)            | 0.85 (0.64-1.13)           | 0.91 (0.67-1.25)    | 0.451         | 0.91 (0.67-1.25)    |
| 105.6-216.6                                                          | 330    | 76273                                | 0.95 (0.79-1.15)    | 0.87 (0.72-1.06)    | 0.90 (0.73-1.10)    | 0.89 (0.66-1.19)    | 0.86 (0.67-1.12)    | 0.90 (0.69-1.19)            | 0.87 (0.66-1.15)           | 0.98 (0.70-1.37)    |               | 0.98 (0.70-1.37)    |
| p-trend                                                              |        |                                      | 0.691               | 0.206               | 0.296               | 0.421               | 0.386               | 0.859                       | 0.132                      | 0.793               |               | 0.793               |
| Hypertension (SBP >= 140 mmHg, or DBP >= 90 mmHg, or self-reported)  |        |                                      |                     |                     |                     |                     |                     |                             |                            |                     |               |                     |
| Normotensive                                                         | 554    | 174179                               | 1 (referent)                | 1 (referent)               | 1 (referent)        | 1 (referent)  | 1 (referent)        |
| Hypertensive                                                         | 504    | 133139                               | 0.88 (0.77-1.00)    | 0.84 (0.74-0.96)    | 0.83 (0.72-0.95)    | 0.89 (0.74-1.07)    | 0.81 (0.67-0.97)    | 0.90 (0.74-1.10)            | 0.81 (0.69-0.96)           | 0.93 (0.74-1.18)    | 0.562         | 0.93 (0.74-1.18)    |

| Age > 53 yrs                                                                                                              | Age           | Never smokers                                                                                                             | Ever smokers                                                                                                              | Smoking       | Alcohol <= 12g                                                                                                            | Alcohol > 12g                                                                                                             | Alcohol       | No antihypertensive treatment                                                                                             | Antihypertensive treatment                                                                                                | Treatment     | Lymphoma                                                                                                                   |
|---------------------------------------------------------------------------------------------------------------------------|---------------|---------------------------------------------------------------------------------------------------------------------------|---------------------------------------------------------------------------------------------------------------------------|---------------|---------------------------------------------------------------------------------------------------------------------------|---------------------------------------------------------------------------------------------------------------------------|---------------|---------------------------------------------------------------------------------------------------------------------------|---------------------------------------------------------------------------------------------------------------------------|---------------|----------------------------------------------------------------------------------------------------------------------------|
| HR (adjusted)                                                                                                             | p-interaction | HR (adjusted)                                                                                                             | HR (adjusted)                                                                                                             | p-interaction | HR (adjusted)                                                                                                             | HR (adjusted)                                                                                                             | p-interaction | HR (adjusted)                                                                                                             | HR (adjusted)                                                                                                             | p-interaction |                                                                                                                            |
| 707<br>154015                                                                                                             |               | 437<br>141931                                                                                                             | 609<br>160623                                                                                                             |               | 681<br>205214                                                                                                             | 377<br>102104                                                                                                             |               | 716<br>227336                                                                                                             | 119<br>37017                                                                                                              |               | Cases<br>Cohort size                                                                                                       |
| 0.954 (0.916-0.993)                                                                                                       | 0.168         | 0.993 (0.940-1.048)                                                                                                       | 0.947 (0.905-0.992)                                                                                                       | 0.32          | 0.969 (0.928-1.012)                                                                                                       | 0.962 (0.907-1.020)                                                                                                       | 0.911         | 0.974 (0.931-1.019)                                                                                                       | 0.908 (0.821-1.005)                                                                                                       | 0.389         | Mean Systolic Blood Pressure continuous (per 10mmHg increase)                                                              |
| 0.935 (0.868-1.008)                                                                                                       | 0.184         | 0.982 (0.892-1.082)                                                                                                       | 0.940 (0.867-1.019)                                                                                                       | 0.645         | 0.960 (0.889-1.036)                                                                                                       | 0.955 (0.860-1.059)                                                                                                       | 0.991         | 0.969 (0.895-1.050)                                                                                                       | 0.872 (0.720-1.057)                                                                                                       | 0.446         | Mean Diastolic Blood Pressure continuous (per 10mmHg increase)                                                             |
| 0.932 (0.875-0.993)                                                                                                       | 0.141         | 0.986 (0.907-1.071)                                                                                                       | 0.931 (0.868-0.998)                                                                                                       | 0.444         | 0.957 (0.896-1.022)                                                                                                       | 0.948 (0.868-1.037)                                                                                                       | 0.949         | 0.964 (0.900-1.033)                                                                                                       | 0.859 (0.728-1.012)                                                                                                       | 0.345         | Mean Blood Pressure (1/3SBP+2/3DBP) continuous (per 10mmHg increase)                                                       |
| 1 (referent)<br>0.82 (0.62-1.07)<br>0.98 (0.76-1.26)<br>0.82 (0.64-1.04)<br>0.80 (0.59-1.08)<br>0.77 (0.49-1.20)<br>0.129 | 0.414         | 1 (referent)<br>0.81 (0.59-1.10)<br>0.91 (0.67-1.24)<br>0.89 (0.66-1.20)<br>0.81 (0.55-1.21)<br>1.14 (0.65-2.00)<br>0.818 | 1 (referent)<br>0.85 (0.66-1.10)<br>0.89 (0.69-1.15)<br>0.76 (0.59-0.98)<br>0.89 (0.65-1.22)<br>0.66 (0.38-1.14)<br>0.095 | 0.495         | 1 (referent)<br>0.88 (0.69-1.12)<br>0.93 (0.73-1.19)<br>0.87 (0.69-1.10)<br>0.79 (0.57-1.09)<br>1.03 (0.65-1.65)<br>0.328 | 1 (referent)<br>0.76 (0.54-1.07)<br>0.86 (0.61-1.20)<br>0.73 (0.52-1.01)<br>0.97 (0.66-1.44)<br>0.57 (0.28-1.16)<br>0.337 | 0.945         | 1 (referent)<br>0.86 (0.68-1.07)<br>0.90 (0.72-1.14)<br>0.79 (0.63-1.00)<br>1.03 (0.76-1.40)<br>0.86 (0.48-1.53)<br>0.388 | two cases in referent<br>-<br>-<br>-<br>-<br>-<br>-                                                                       | -             | ESH classification<br>< 120<br>120-129<br>130-139<br>140-159<br>160-179<br>>= 180<br>p-trend                               |
| 1 (referent)<br>0.94 (0.77-1.16)<br>1.06 (0.85-1.33)<br>1.03 (0.84-1.27)<br>0.74 (0.51-1.06)<br>0.39 (0.14-1.05)<br>0.342 | 0.173         | 1 (referent)<br>0.94 (0.72-1.23)<br>1.24 (0.94-1.64)<br>1.10 (0.84-1.45)<br>0.84 (0.52-1.38)<br>1.01 (0.41-2.48)<br>0.597 | 1 (referent)<br>1.06 (0.86-1.32)<br>1.01 (0.79-1.30)<br>1.05 (0.83-1.32)<br>0.71 (0.47-1.08)<br>0.60 (0.24-1.46)<br>0.343 | 0.388         | 1 (referent)<br>0.98 (0.80-1.21)<br>1.24 (0.99-1.55)<br>0.99 (0.79-1.23)<br>0.87 (0.59-1.28)<br>0.76 (0.34-1.71)<br>0.87  | 1 (referent)<br>1.04 (0.78-1.37)<br>0.88 (0.63-1.23)<br>1.17 (0.89-1.56)<br>0.63 (0.37-1.07)<br>0.69 (0.25-1.89)<br>0.637 | 0.882         | 1 (referent)<br>1.02 (0.83-1.24)<br>1.22 (0.98-1.51)<br>1.06 (0.85-1.33)<br>0.78 (0.49-1.24)<br>0.99 (0.41-2.41)<br>0.735 | 1 (referent)<br>0.63 (0.31-1.31)<br>0.92 (0.47-1.77)<br>1.05 (0.58-1.88)<br>0.49 (0.22-1.10)<br>0.18 (0.02-1.35)<br>0.295 | 0.417         | ESH classification<br>< 80<br>80-84<br>85-89<br>90-99<br>100-109<br>>= 110<br>p-trend                                      |
| 1 (referent)<br>0.90 (0.72-1.13)<br>0.81 (0.64-1.04)<br>0.79 (0.59-1.04)<br>0.058                                         | 0.224         | 1 (referent)<br>0.86 (0.66-1.12)<br>0.89 (0.66-1.19)<br>0.88 (0.61-1.26)<br>0.569                                         | 1 (referent)<br>0.87 (0.70-1.09)<br>0.76 (0.59-0.97)<br>0.84 (0.62-1.13)<br>0.104                                         | 0.663         | 1 (referent)<br>0.91 (0.74-1.11)<br>0.87 (0.69-1.10)<br>0.84 (0.62-1.12)<br>0.207                                         | 1 (referent)<br>0.81 (0.60-1.09)<br>0.73 (0.52-1.01)<br>0.88 (0.60-1.28)<br>0.377                                         | 0.869         | 1 (referent)<br>0.88 (0.72-1.07)<br>0.79 (0.63-1.00)<br>0.99 (0.74-1.33)<br>0.395                                         | two cases in referent<br>-<br>-<br>-<br>-                                                                                 | -             | ESH classification<br>< 120<br>120-139<br>140-159<br>>= 160<br>p-trend                                                     |
| 1 (referent)<br>0.99 (0.83-1.19)<br>1.03 (0.84-1.27)<br>0.67 (0.47-0.95)<br>0.217                                         | 0.167         | 1 (referent)<br>1.06 (0.84-1.33)<br>1.10 (0.83-1.44)<br>0.87 (0.56-1.35)<br>0.97                                          | 1 (referent)<br>1.04 (0.86-1.26)<br>1.05 (0.83-1.32)<br>0.69 (0.47-1.02)<br>0.346                                         | 0.605         | 1 (referent)<br>1.09 (0.91-1.30)<br>0.98 (0.78-1.23)<br>0.85 (0.59-1.21)<br>0.544                                         | 1 (referent)<br>0.97 (0.76-1.25)<br>1.18 (0.89-1.56)<br>0.64 (0.39-1.05)<br>0.675                                         | 0.876         | 1 (referent)<br>1.09 (0.92-1.29)<br>1.06 (0.85-1.32)<br>0.81 (0.53-1.23)<br>0.923                                         | 1 (referent)<br>0.78 (0.43-1.42)<br>1.04 (0.58-1.87)<br>0.43 (0.20-0.93)<br>0.171                                         | 0.36          | ESH classification<br>< 80<br>80-89<br>90-99<br>>= 100<br>p-trend                                                          |
| 1 (referent)<br>0.86 (0.67-1.10)<br>0.87 (0.68-1.11)<br>0.82 (0.65-1.04)<br>0.174                                         | 0.4           | 1 (referent)<br>1.02 (0.76-1.38)<br>0.99 (0.73-1.34)<br>1.00 (0.73-1.36)<br>0.933                                         | 1 (referent)<br>0.83 (0.65-1.07)<br>0.84 (0.66-1.08)<br>0.80 (0.62-1.03)<br>0.127                                         | 0.501         | 1 (referent)<br>0.84 (0.67-1.06)<br>0.91 (0.72-1.14)<br>0.85 (0.67-1.07)<br>0.305                                         | 1 (referent)<br>1.07 (0.76-1.52)<br>0.92 (0.65-1.31)<br>0.96 (0.68-1.36)<br>0.558                                         | 0.867         | 1 (referent)<br>0.93 (0.75-1.15)<br>0.94 (0.75-1.17)<br>0.91 (0.72-1.16)<br>0.509                                         | 1 (referent)<br>0.37 (0.12-1.19)<br>0.68 (0.26-1.78)<br>0.55 (0.22-1.40)<br>0.68                                          | 0.962         | Mean BP (mmHg) (1/3SBP+2/3DBP) Cohort-specific quartiles<br>50.0-88.3<br>88.5-96.6<br>96.8-105.5<br>105.6-216.6<br>p-trend |
| 1 (referent)<br>0.81 (0.69-0.94)                                                                                          | 0.209         | 1 (referent)<br>0.86 (0.70-1.06)                                                                                          | 1 (referent)<br>0.83 (0.70-0.99)                                                                                          | 0.887         | 1 (referent)<br>0.84 (0.71-0.99)                                                                                          | 1 (referent)<br>0.86 (0.69-1.07)                                                                                          | 0.729         | -<br>1 (referent)                                                                                                         | -<br>0.99 (0.79-1.24)                                                                                                     |               | Hypertension (SBP >= 140 mmHg, or DBP >= 90 mmHg, or self-reported)<br>Normotensive<br>Hypertensive                        |

| Non-Hodgkin Lymphoma                                                             |        | Excluding first 2 years of follow-up |                     |                     | Men                 | Women               | Sex                 | BMI <= 25 mg/m <sup>2</sup> | BMI > 25 mg/m <sup>2</sup> | BMI                 | Age <= 53 yrs |                     |
|----------------------------------------------------------------------------------|--------|--------------------------------------|---------------------|---------------------|---------------------|---------------------|---------------------|-----------------------------|----------------------------|---------------------|---------------|---------------------|
| Cases                                                                            | Cohort | HR (crude)                           | HR (adjusted)       | HR (adjusted)       | HR (adjusted)       | HR (adjusted)       | p-interaction       | HR (adjusted)               | HR (adjusted)              | p-interaction       | HR (adjusted) |                     |
| Cases                                                                            |        | 882                                  | 882                 | 822                 | 409                 | 473                 |                     | 400                         | 482                        |                     | 290           |                     |
| Cohort size                                                                      |        | 307318                               | 307318              | 301857              | 112591              | 194727              |                     | 146326                      | 160992                     |                     | 153303        |                     |
| <b>Mean Systolic Blood Pressure continuous (per 10mmHg increase)</b>             | 882    | 307318                               | 0.968 (0.933-1.004) | 0.957 (0.921-0.994) | 0.954 (0.917-0.993) | 0.963 (0.910-1.020) | 0.953 (0.905-1.003) | 0.83                        | 0.951 (0.897-1.008)        | 0.964 (0.917-1.013) | 0.458         | 1.005 (0.934-1.081) |
| <b>Mean Diastolic Blood Pressure continuous (per 10mmHg increase)</b>            | 882    | 307318                               | 0.977 (0.916-1.042) | 0.952 (0.890-1.018) | 0.947 (0.883-1.015) | 0.928 (0.840-1.025) | 0.981 (0.895-1.075) | 0.275                       | 0.995 (0.899-1.100)        | 0.926 (0.847-1.013) | 0.344         | 1.017 (0.903-1.146) |
| <b>Mean Blood Pressure (1/3SBP+2/3DBP) continuous (per 10mmHg increase)</b>      | 882    | 307318                               | 0.965 (0.913-1.019) | 0.943 (0.890-1.000) | 0.939 (0.884-0.997) | 0.937 (0.859-1.021) | 0.954 (0.882-1.032) | 0.627                       | 0.960 (0.880-1.047)        | 0.936 (0.867-1.010) | 0.874         | 1.012 (0.911-1.125) |
| <b>Systolic Blood Pressure (mmHg) ESH classification</b>                         |        |                                      |                     |                     |                     |                     |                     |                             |                            |                     |               |                     |
| < 120                                                                            | 185    | 86141                                | 1 (referent)        | 1 (referent)        | 1 (referent)        | 1 (referent)        |                     | 1 (referent)                | 1 (referent)               |                     | 1 (referent)  |                     |
| 120-129                                                                          | 169    | 66446                                | 0.89 (0.72-1.10)    | 0.86 (0.69-1.06)    | 0.83 (0.66-1.03)    | 1.01 (0.71-1.42)    | 0.78 (0.59-1.02)    |                             | 0.72 (0.54-0.96)           | 1.06 (0.77-1.48)    |               | 0.89 (0.65-1.22)    |
| 130-139                                                                          | 185    | 57482                                | 0.97 (0.79-1.20)    | 0.92 (0.74-1.14)    | 0.89 (0.71-1.10)    | 1.03 (0.74-1.45)    | 0.87 (0.66-1.15)    |                             | 0.81 (0.60-1.09)           | 1.09 (0.79-1.50)    |               | 0.76 (0.53-1.09)    |
| 140-159                                                                          | 225    | 68235                                | 0.82 (0.66-1.00)    | 0.77 (0.62-0.94)    | 0.74 (0.60-0.92)    | 0.87 (0.62-1.22)    | 0.72 (0.54-0.95)    | 0.689                       | 0.81 (0.60-1.08)           | 0.81 (0.59-1.12)    | 0.415         | 0.86 (0.60-1.23)    |
| 160-179                                                                          | 94     | 22656                                | 0.93 (0.72-1.21)    | 0.87 (0.66-1.14)    | 0.82 (0.62-1.09)    | 0.99 (0.66-1.49)    | 0.81 (0.56-1.17)    |                             | 0.90 (0.60-1.36)           | 0.94 (0.65-1.37)    |               | 1.05 (0.60-1.84)    |
| >= 180                                                                           | 24     | 6358                                 | 0.82 (0.53-1.27)    | 0.77 (0.49-1.19)    | 0.77 (0.49-1.21)    | 0.76 (0.39-1.48)    | 0.83 (0.46-1.50)    |                             | 0.11 (0.02-0.80)           | 1.14 (0.69-1.88)    |               | 1.72 (0.74-4.02)    |
| p-trend                                                                          |        |                                      | 0.187               | 0.066               | 0.043               | 0.386               | 0.113               |                             | 0.118                      | 0.344               |               | 0.829               |
| <b>Diastolic Blood Pressure (mmHg) ESH classification</b>                        |        |                                      |                     |                     |                     |                     |                     |                             |                            |                     |               |                     |
| < 80                                                                             | 318    | 132590                               | 1 (referent)        |                             | 1 (referent)               | 1 (referent)        |               | 1 (referent)        |
| 80-84                                                                            | 190    | 64872                                | 1.02 (0.85-1.22)    | 0.99 (0.83-1.19)    | 1.02 (0.84-1.23)    | 0.93 (0.70-1.22)    | 1.04 (0.82-1.33)    |                             | 1.02 (0.78-1.33)           | 0.95 (0.74-1.23)    |               | 1.12 (0.82-1.53)    |
| 85-89                                                                            | 151    | 41500                                | 1.18 (0.97-1.43)    | 1.14 (0.93-1.39)    | 1.08 (0.88-1.33)    | 1.06 (0.79-1.43)    | 1.20 (0.92-1.57)    |                             | 1.39 (1.04-1.85)           | 0.96 (0.73-1.27)    |               | 1.23 (0.86-1.75)    |
| 90-99                                                                            | 178    | 51196                                | 1.07 (0.89-1.29)    | 1.02 (0.84-1.24)    | 1.01 (0.83-1.24)    | 1.02 (0.77-1.34)    | 1.02 (0.77-1.34)    | 0.279                       | 1.15 (0.85-1.54)           | 0.94 (0.73-1.20)    | 0.176         | 1.15 (0.81-1.64)    |
| 100-109                                                                          | 37     | 13896                                | 0.79 (0.56-1.12)    | 0.74 (0.52-1.05)    | 0.69 (0.48-1.00)    | 0.66 (0.40-1.07)    | 0.87 (0.52-1.44)    |                             | 0.67 (0.34-1.32)           | 0.75 (0.50-1.13)    |               | 0.80 (0.40-1.60)    |
| >= 110                                                                           | 8      | 3264                                 | 0.77 (0.38-1.56)    | 0.71 (0.35-1.44)    | 0.76 (0.38-1.55)    | 0.40 (0.13-1.25)    | 1.27 (0.52-3.10)    |                             | 0.85 (0.21-3.42)           | 0.65 (0.29-1.47)    |               | 1.88 (0.76-4.68)    |
| p-trend                                                                          |        |                                      | 0.96                | 0.495               | 0.349               | 0.279               | 0.793               |                             | 0.498                      | 0.191               |               | 0.421               |
| <b>Systolic Blood Pressure (mmHg) ASH classification</b>                         |        |                                      |                     |                     |                     |                     |                     |                             |                            |                     |               |                     |
| < 120                                                                            | 185    | 86141                                | 1 (referent)        |                             | 1 (referent)               | 1 (referent)        |               | 1 (referent)        |
| 120-139                                                                          | 354    | 123928                               | 0.93 (0.78-1.12)    | 0.89 (0.74-1.07)    | 0.85 (0.71-1.03)    | 1.02 (0.75-1.39)    | 0.82 (0.65-1.04)    |                             | 0.76 (0.59-0.97)           | 1.08 (0.80-1.44)    |               | 0.83 (0.63-1.10)    |
| 140-159                                                                          | 225    | 68235                                | 0.81 (0.66-1.00)    | 0.76 (0.62-0.94)    | 0.74 (0.59-0.92)    | 0.87 (0.62-1.22)    | 0.71 (0.54-0.94)    | 0.558                       | 0.81 (0.60-1.08)           | 0.81 (0.59-1.11)    | 0.451         | 0.86 (0.60-1.23)    |
| >= 160                                                                           | 118    | 29014                                | 0.90 (0.71-1.16)    | 0.84 (0.65-1.09)    | 0.81 (0.62-1.05)    | 0.94 (0.63-1.39)    | 0.81 (0.58-1.14)    |                             | 0.74 (0.49-1.12)           | 0.99 (0.69-1.40)    |               | 1.18 (0.72-1.94)    |
| p-trend                                                                          |        |                                      | 0.148               | 0.053               | 0.031               | 0.414               | 0.076               |                             | 0.116                      | 0.279               |               | 0.974               |
| <b>Diastolic Blood Pressure (mmHg) ASH classification</b>                        |        |                                      |                     |                     |                     |                     |                     |                             |                            |                     |               |                     |
| < 80                                                                             | 318    | 132590                               | 1 (referent)        |                             | 1 (referent)               | 1 (referent)        |               | 1 (referent)        |
| 80-89                                                                            | 341    | 106372                               | 1.08 (0.93-1.27)    | 1.05 (0.90-1.23)    | 1.04 (0.89-1.23)    | 0.98 (0.77-1.25)    | 1.11 (0.90-1.36)    |                             | 1.16 (0.92-1.45)           | 0.96 (0.77-1.19)    |               | 1.16 (0.89-1.52)    |
| 90-99                                                                            | 178    | 51196                                | 1.07 (0.89-1.29)    | 1.02 (0.84-1.24)    | 1.01 (0.83-1.24)    | 1.02 (0.77-1.34)    | 1.02 (0.77-1.34)    | 0.285                       | 1.14 (0.85-1.54)           | 0.94 (0.73-1.20)    | 0.287         | 1.15 (0.81-1.64)    |
| >= 100                                                                           | 45     | 17160                                | 0.79 (0.58-1.08)    | 0.73 (0.53-1.01)    | 0.70 (0.50-0.99)    | 0.60 (0.38-0.95)    | 0.93 (0.59-1.46)    |                             | 0.70 (0.38-1.29)           | 0.73 (0.50-1.07)    |               | 1.00 (0.56-1.78)    |
| p-trend                                                                          |        |                                      | 0.673               | 0.288               | 0.238               | 0.173               | 0.998               |                             | 0.859                      | 0.165               |               | 0.55                |
| <b>Mean BP (mmHg) (1/3SBP+2/3DBP) Cohort-specific quartiles</b>                  |        |                                      |                     |                     |                     |                     |                     |                             |                            |                     |               |                     |
| 50.0-88.3                                                                        | 168    | 76991                                | 1 (referent)        |                             | 1 (referent)               | 1 (referent)        |               | 1 (referent)        |
| 88.5-96.6                                                                        | 208    | 77727                                | 0.96 (0.78-1.18)    | 0.92 (0.75-1.14)    | 0.91 (0.74-1.13)    | 0.90 (0.64-1.27)    | 0.94 (0.72-1.22)    |                             | 0.84 (0.64-1.11)           | 1.02 (0.74-1.41)    |               | 0.97 (0.71-1.34)    |
| 96.8-105.5                                                                       | 239    | 76327                                | 0.96 (0.78-1.17)    | 0.90 (0.74-1.11)    | 0.88 (0.71-1.09)    | 0.89 (0.64-1.24)    | 0.93 (0.71-1.22)    | 0.876                       | 0.97 (0.74-1.29)           | 0.88 (0.64-1.20)    | 0.569         | 0.92 (0.65-1.30)    |
| 105.6-216.6                                                                      | 267    | 76273                                | 0.91 (0.75-1.12)    | 0.85 (0.69-1.05)    | 0.83 (0.67-1.03)    | 0.88 (0.64-1.23)    | 0.82 (0.62-1.09)    |                             | 0.90 (0.67-1.22)           | 0.84 (0.62-1.14)    |               | 1.00 (0.69-1.44)    |
| p-trend                                                                          |        |                                      | 0.396               | 0.133               | 0.101               | 0.541               | 0.192               |                             | 0.736                      | 0.108               |               | 0.892               |
| <b>Hypertension (SBP &gt;= 140 mmHg, or DBP &gt;= 90 mmHg, or self-reported)</b> |        |                                      |                     |                     |                     |                     |                     |                             |                            |                     |               |                     |
| Normotensive                                                                     | 473    | 174179                               | 1 (referent)        |                             | 1 (referent)               | 1 (referent)        |               | 1 (referent)        |
| Hypertensive                                                                     | 409    | 133139                               | 0.83 (0.73-0.96)    | 0.81 (0.70-0.93)    | 0.79 (0.68-0.91)    | 0.87 (0.71-1.08)    | 0.76 (0.62-0.92)    | 0.285                       | 0.85 (0.69-1.06)           | 0.79 (0.65-0.95)    | 0.784         | 0.92 (0.71-1.19)    |



| Other location AC                                                                |        | Excluding first 2 years of follow-up |                     |                     | Men                 | Women               | Sex                 | BMI <= 25 mg/m <sup>2</sup> | BMI > 25 mg/m <sup>2</sup> | BMI                 | Age <= 53 yrs |                     |
|----------------------------------------------------------------------------------|--------|--------------------------------------|---------------------|---------------------|---------------------|---------------------|---------------------|-----------------------------|----------------------------|---------------------|---------------|---------------------|
| Cases                                                                            | Cohort | HR (crude)                           | HR (adjusted)       | HR (adjusted)       | HR (adjusted)       | HR (adjusted)       | p-interaction       | HR (adjusted)               | HR (adjusted)              | p-interaction       | HR (adjusted) |                     |
| Cases                                                                            |        | 406                                  | 406                 | 380                 | 158                 | 248                 |                     | 186                         | 220                        |                     | 93            |                     |
| Cohort size                                                                      |        | 307318                               | 307318              | 301857              | 112591              | 194727              |                     | 146326                      | 160992                     |                     | 153303        |                     |
| <b>Mean Systolic Blood Pressure continuous (per 10mmHg increase)</b>             | 406    | 307318                               | 1.078 (1.024-1.134) | 1.085 (1.030-1.142) | 1.079 (1.023-1.138) | 1.129 (1.038-1.227) | 1.054 (0.986-1.126) | 0.117                       | 1.093 (1.013-1.179)        | 1.077 (1.004-1.154) | 0.984         | 1.124 (0.996-1.269) |
| <b>Mean Diastolic Blood Pressure continuous (per 10mmHg increase)</b>            | 406    | 307318                               | 1.013 (0.922-1.114) | 1.028 (0.932-1.134) | 1.020 (0.921-1.130) | 1.164 (1.001-1.354) | 0.937 (0.824-1.067) | 0.022                       | 1.059 (0.916-1.225)        | 1.004 (0.879-1.146) | 0.746         | 1.191 (0.969-1.464) |
| <b>Mean Blood Pressure (1/3SBP+2/3DBP) continuous (per 10mmHg increase)</b>      | 406    | 307318                               | 1.068 (0.987-1.156) | 1.083 (0.998-1.175) | 1.074 (0.987-1.169) | 1.182 (1.040-1.344) | 1.014 (0.912-1.129) | 0.041                       | 1.105 (0.979-1.246)        | 1.064 (0.953-1.188) | 0.87          | 1.188 (0.994-1.420) |
| <b>Systolic Blood Pressure (mmHg) ESH classification</b>                         |        |                                      |                     |                     |                     |                     |                     |                             |                            |                     |               |                     |
| < 120                                                                            | 59     | 86141                                | 1 (referent)        |                             | 1 (referent)               | 1 (referent)        |               | 1 (referent)        |
| 120-129                                                                          | 70     | 66446                                | 1.12 (0.79-1.59)    | 1.17 (0.82-1.66)    | 1.25 (0.82-1.81)    | 1.45 (0.73-2.91)    | 1.11 (0.73-1.68)    |                             | 1.01 (0.64-1.61)           | 1.46 (0.83-2.58)    |               | 1.67 (0.93-2.99)    |
| 130-139                                                                          | 79     | 57482                                | 1.24 (0.88-1.75)    | 1.31 (0.92-1.85)    | 1.40 (0.97-2.01)    | 1.71 (0.87-3.36)    | 1.20 (0.79-1.82)    |                             | 1.21 (0.76-1.91)           | 1.49 (0.85-2.61)    |               | 1.51 (0.79-2.88)    |
| 140-159                                                                          | 122    | 68235                                | 1.32 (0.96-1.83)    | 1.41 (1.01-1.96)    | 1.41 (1.00-2.00)    | 1.84 (0.96-3.54)    | 1.25 (0.84-1.88)    | 0.142                       | 1.26 (0.81-1.98)           | 1.66 (0.97-2.84)    | 0.803         | 1.93 (1.01-3.68)    |
| 160-179                                                                          | 58     | 22656                                | 1.64 (1.12-2.40)    | 1.74 (1.18-2.58)    | 1.73 (1.14-2.60)    | 2.49 (1.21-5.12)    | 1.46 (0.89-2.38)    |                             | 1.92 (1.12-3.29)           | 1.76 (0.97-3.21)    |               | 2.47 (0.96-6.35)    |
| >= 180                                                                           | 18     | 6358                                 | 1.77 (1.02-3.06)    | 1.83 (1.05-3.20)    | 1.88 (1.06-3.34)    | 2.87 (1.16-7.09)    | 1.37 (0.65-2.90)    |                             | 1.50 (0.57-3.91)           | 2.22 (1.05-4.66)    |               | no cases            |
| p-trend                                                                          |        |                                      | 0.004               | 0.002               | 0.006               | 0.005               | 0.123               |                             | 0.03                       | 0.031               |               | 0.071               |
| <b>Diastolic Blood Pressure (mmHg) ESH classification</b>                        |        |                                      |                     |                     |                     |                     |                     |                             |                            |                     |               |                     |
| < 80                                                                             | 146    | 132590                               | 1 (referent)        |                             | 1 (referent)               | 1 (referent)        |               | 1 (referent)        |
| 80-84                                                                            | 90     | 64872                                | 0.99 (0.75-1.29)    | 1.01 (0.77-1.32)    | 1.01 (0.77-1.33)    | 1.40 (0.87-2.25)    | 0.89 (0.64-1.25)    |                             | 0.93 (0.63-1.37)           | 1.09 (0.74-1.58)    |               | 1.21 (0.71-2.06)    |
| 85-89                                                                            | 62     | 41500                                | 0.98 (0.73-1.32)    | 1.01 (0.74-1.37)    | 0.95 (0.69-1.31)    | 1.46 (0.88-2.42)    | 0.83 (0.56-1.23)    |                             | 0.99 (0.63-1.58)           | 1.02 (0.68-1.54)    |               | 0.78 (0.36-1.70)    |
| 90-99                                                                            | 76     | 51196                                | 0.91 (0.68-1.20)    | 0.93 (0.70-1.25)    | 0.89 (0.66-1.21)    | 1.46 (0.91-2.35)    | 0.70 (0.47-1.04)    | 0.039                       | 1.00 (0.65-1.56)           | 0.90 (0.61-1.32)    | 0.685         | 1.37 (0.75-2.51)    |
| 100-109                                                                          | 28     | 13896                                | 1.20 (0.80-1.81)    | 1.23 (0.81-1.88)    | 1.19 (0.77-1.84)    | 1.80 (0.97-3.33)    | 0.96 (0.52-1.76)    |                             | 1.49 (0.77-2.92)           | 1.12 (0.66-1.92)    |               | 1.30 (0.45-3.76)    |
| >= 110                                                                           | 4      | 3264                                 | 0.78 (0.29-2.12)    | 0.79 (0.29-2.16)    | 0.83 (0.31-2.27)    | 0.91 (0.21-3.81)    | 0.86 (0.21-3.51)    |                             | 0.84 (0.12-6.09)           | 0.80 (0.25-2.56)    |               | 1.47 (0.20-10.90)   |
| p-trend                                                                          |        |                                      | 0.874               | 0.969               | 0.798               | 0.112               | 0.157               |                             | 0.6                        | 0.708               |               | 0.452               |
| <b>Systolic Blood Pressure (mmHg) ASH classification</b>                         |        |                                      |                     |                     |                     |                     |                     |                             |                            |                     |               |                     |
| < 120                                                                            | 59     | 86141                                | 1 (referent)        |                             | 1 (referent)               | 1 (referent)        |               | 1 (referent)        |
| 120-139                                                                          | 149    | 123928                               | 1.18 (0.87-1.60)    | 1.24 (0.91-1.69)    | 1.32 (0.96-1.83)    | 1.58 (0.84-2.97)    | 1.15 (0.80-1.66)    |                             | 1.10 (0.74-1.64)           | 1.47 (0.88-2.48)    |               | 1.60 (0.94-2.73)    |
| 140-159                                                                          | 122    | 68235                                | 1.32 (0.95-1.83)    | 1.40 (1.00-1.95)    | 1.41 (0.99-1.99)    | 1.83 (0.95-3.51)    | 1.25 (0.84-1.87)    | 0.165                       | 1.26 (0.81-1.97)           | 1.66 (0.97-2.84)    | 0.866         | 1.94 (1.02-3.69)    |
| >= 160                                                                           | 76     | 29014                                | 1.66 (1.16-2.39)    | 1.76 (1.21-2.55)    | 1.75 (1.18-2.59)    | 2.55 (1.27-5.12)    | 1.43 (0.90-2.28)    |                             | 1.82 (1.09-3.06)           | 1.86 (1.05-3.31)    |               | 2.04 (0.79-5.25)    |
| p-trend                                                                          |        |                                      | 0.005               | 0.002               | 0.007               | 0.006               | 0.122               |                             | 0.028                      | 0.037               |               | 0.037               |
| <b>Diastolic Blood Pressure (mmHg) ASH classification</b>                        |        |                                      |                     |                     |                     |                     |                     |                             |                            |                     |               |                     |
| < 80                                                                             | 146    | 132590                               | 1 (referent)        |                             | 1 (referent)               | 1 (referent)        |               | 1 (referent)        |
| 80-89                                                                            | 152    | 106372                               | 0.98 (0.78-1.24)    | 1.01 (0.80-1.28)    | 0.99 (0.77-1.26)    | 1.42 (0.93-2.17)    | 0.87 (0.65-1.16)    |                             | 0.95 (0.68-1.33)           | 1.06 (0.76-1.47)    |               | 1.07 (0.65-1.74)    |
| 90-99                                                                            | 76     | 51196                                | 0.91 (0.68-1.20)    | 0.93 (0.70-1.25)    | 0.89 (0.66-1.21)    | 1.46 (0.91-2.35)    | 0.70 (0.47-1.04)    | 0.041                       | 1.00 (0.65-1.56)           | 0.90 (0.61-1.32)    | 0.762         | 1.37 (0.75-2.52)    |
| >= 100                                                                           | 32     | 17160                                | 1.13 (0.76-1.66)    | 1.16 (0.78-1.72)    | 1.13 (0.75-1.70)    | 1.62 (0.89-2.93)    | 0.94 (0.53-1.67)    |                             | 1.40 (0.73-2.66)           | 1.06 (0.64-1.76)    |               | 1.34 (0.51-3.53)    |
| p-trend                                                                          |        |                                      | 0.973               | 0.865               | 0.946               | 0.089               | 0.189               |                             | 0.59                       | 0.824               |               | 0.318               |
| <b>Mean BP (mmHg) (1/3SBP+2/3DBP) Cohort-specific quartiles</b>                  |        |                                      |                     |                     |                     |                     |                     |                             |                            |                     |               |                     |
| 50.0-88.3                                                                        | 57     | 76991                                | 1 (referent)        |                             | 1 (referent)               | 1 (referent)        |               | 1 (referent)        |
| 88.5-96.6                                                                        | 94     | 77727                                | 1.21 (0.86-1.68)    | 1.26 (0.90-1.76)    | 1.34 (0.95-1.89)    | 1.10 (0.55-2.20)    | 1.37 (0.94-2.02)    |                             | 0.99 (0.64-1.52)           | 1.81 (1.02-3.25)    |               | 1.43 (0.80-2.55)    |
| 96.8-105.5                                                                       | 117    | 76327                                | 1.29 (0.93-1.78)    | 1.36 (0.98-1.89)    | 1.37 (0.97-1.93)    | 1.78 (0.94-3.39)    | 1.20 (0.80-1.78)    | 0.066                       | 1.15 (0.75-1.77)           | 1.81 (1.03-3.18)    | 0.726         | 1.50 (0.80-2.80)    |
| 105.6-216.6                                                                      | 138    | 76273                                | 1.25 (0.91-1.73)    | 1.33 (0.95-1.86)    | 1.32 (0.93-1.86)    | 1.71 (0.90-3.25)    | 1.15 (0.77-1.73)    |                             | 1.35 (0.88-2.08)           | 1.58 (0.89-2.78)    |               | 1.63 (0.83-3.17)    |
| p-trend                                                                          |        |                                      | 0.207               | 0.125               | 0.23                | 0.034               | 0.822               |                             | 0.126                      | 0.499               |               | 0.161               |
| <b>Hypertension (SBP &gt;= 140 mmHg, or DBP &gt;= 90 mmHg, or self-reported)</b> |        |                                      |                     |                     |                     |                     |                     |                             |                            |                     |               |                     |
| Normotensive                                                                     | 168    | 174179                               | 1 (referent)        |                             | 1 (referent)               | 1 (referent)        |               | 1 (referent)        |
| Hypertensive                                                                     | 238    | 133139                               | 1.26 (1.03-1.55)    | 1.30 (1.05-1.60)    | 1.24 (1.00-1.54)    | 1.56 (1.10-2.22)    | 1.14 (0.87-1.49)    | 0.106                       | 1.46 (1.08-1.98)           | 1.16 (0.87-1.55)    | 0.377         | 1.61 (1.05-2.49)    |

| Age > 53 yrs                                                                                                              | Age           | Never smokers                                                                                                             | Ever smokers                                                                                                              | Smoking       | Alcohol <= 12g                                                                                                            | Alcohol > 12g                                                                                                             | Alcohol       | No antihypertensive treatment                                                                                              | Antihypertensive treatment                                                                                                | Treatment     | Other location AC                                                                                                             |
|---------------------------------------------------------------------------------------------------------------------------|---------------|---------------------------------------------------------------------------------------------------------------------------|---------------------------------------------------------------------------------------------------------------------------|---------------|---------------------------------------------------------------------------------------------------------------------------|---------------------------------------------------------------------------------------------------------------------------|---------------|----------------------------------------------------------------------------------------------------------------------------|---------------------------------------------------------------------------------------------------------------------------|---------------|-------------------------------------------------------------------------------------------------------------------------------|
| HR (adjusted)                                                                                                             | p-interaction | HR (adjusted)                                                                                                             | HR (adjusted)                                                                                                             | p-interaction | HR (adjusted)                                                                                                             | HR (adjusted)                                                                                                             | p-interaction | HR (adjusted)                                                                                                              | HR (adjusted)                                                                                                             | p-interaction |                                                                                                                               |
| 313<br>154015                                                                                                             |               | 126<br>141931                                                                                                             | 277<br>160623                                                                                                             |               | 254<br>205214                                                                                                             | 152<br>102104                                                                                                             |               | 283<br>227336                                                                                                              | 53<br>37017                                                                                                               |               | Cases<br>Cohort size                                                                                                          |
| 1.077 (1.018-1.141)                                                                                                       | 0.92          | 1.131 (1.031-1.241)                                                                                                       | 1.059 (0.994-1.129)                                                                                                       | 0.285         | 1.071 (1.003-1.145)                                                                                                       | 1.101 (1.013-1.197)                                                                                                       | 0.736         | 1.128 (1.057-1.203)                                                                                                        | 1.040 (0.901-1.200)                                                                                                       | 0.479         | Mean Systolic Blood Pressure continuous (per 10mmHg increase)                                                                 |
| 0.989 (0.885-1.106)                                                                                                       | 0.433         | 1.093 (0.917-1.304)                                                                                                       | 0.991 (0.879-1.117)                                                                                                       | 0.612         | 1.000 (0.882-1.134)                                                                                                       | 1.062 (0.906-1.245)                                                                                                       | 0.396         | 1.124 (0.994-1.271)                                                                                                        | 0.827 (0.620-1.103)                                                                                                       | 0.056         | Mean Diastolic Blood Pressure continuous (per 10mmHg increase)                                                                |
| 1.060 (0.967-1.162)                                                                                                       | 0.682         | 1.155 (0.997-1.337)                                                                                                       | 1.043 (0.944-1.153)                                                                                                       | 0.388         | 1.058 (0.953-1.175)                                                                                                       | 1.113 (0.975-1.271)                                                                                                       | 0.518         | 1.168 (1.054-1.294)                                                                                                        | 0.947 (0.743-1.207)                                                                                                       | 0.165         | Mean Blood Pressure (1/3SBP+2/3DBP) continuous (per 10mmHg increase)                                                          |
| 1 (referent)<br>1.00 (0.64-1.55)<br>1.23 (0.81-1.87)<br>1.26 (0.85-1.87)<br>1.56 (1.00-2.44)<br>1.77 (0.99-3.20)<br>0.01  | 0.905         | 1 (referent)<br>1.33 (0.69-2.57)<br>1.28 (0.65-2.51)<br>1.60 (0.85-3.01)<br>2.46 (1.22-4.97)<br>3.19 (1.28-7.95)<br>0.004 | 1 (referent)<br>1.08 (0.71-1.63)<br>1.28 (0.85-1.93)<br>1.27 (0.85-1.88)<br>1.43 (0.88-2.32)<br>1.32 (0.64-2.71)<br>0.114 | 0.163         | 1 (referent)<br>1.07 (0.69-1.65)<br>1.35 (0.88-2.06)<br>1.31 (0.87-1.99)<br>1.64 (1.00-2.68)<br>1.71 (0.85-3.46)<br>0.026 | 1 (referent)<br>1.38 (0.76-2.51)<br>1.24 (0.67-2.29)<br>1.57 (0.89-2.77)<br>1.90 (0.98-3.69)<br>2.01 (0.81-4.99)<br>0.042 | 0.936         | 1 (referent)<br>1.20 (0.80-1.78)<br>1.37 (0.92-2.04)<br>1.69 (1.15-2.48)<br>2.13 (1.32-3.44)<br>2.06 (0.95-4.49)<br>0.0003 | two cases in referent<br>-<br>-<br>-<br>-<br>-                                                                            | -             | ESH classification<br>< 120<br>120-129<br>130-139<br>140-159<br>160-179<br>>= 180<br>p-trend                                  |
| 1 (referent)<br>0.96 (0.70-1.31)<br>1.06 (0.76-1.48)<br>0.85 (0.61-1.18)<br>1.21 (0.76-1.91)<br>0.67 (0.21-2.13)<br>0.769 | 0.898         | 1 (referent)<br>0.86 (0.52-1.41)<br>1.02 (0.59-1.74)<br>0.79 (0.46-1.36)<br>1.60 (0.81-3.17)<br>1.33 (0.32-5.58)<br>0.696 | 1 (referent)<br>1.09 (0.79-1.50)<br>1.01 (0.70-1.47)<br>0.97 (0.69-1.38)<br>1.06 (0.62-1.81)<br>0.57 (0.14-2.34)<br>0.747 | 0.863         | 1 (referent)<br>0.79 (0.56-1.13)<br>1.00 (0.69-1.45)<br>0.88 (0.61-1.27)<br>1.07 (0.61-1.88)<br>0.67 (0.16-2.74)<br>0.798 | 1 (referent)<br>1.46 (0.95-2.26)<br>1.03 (0.61-1.75)<br>1.02 (0.62-1.65)<br>1.50 (0.79-2.87)<br>1.07 (0.26-4.48)<br>0.807 | 0.586         | 1 (referent)<br>1.03 (0.75-1.41)<br>1.03 (0.71-1.49)<br>1.23 (0.87-1.73)<br>1.50 (0.84-2.65)<br>1.09 (0.27-4.45)<br>0.158  | 1 (referent)<br>0.85 (0.35-2.04)<br>0.53 (0.20-1.43)<br>0.55 (0.24-1.29)<br>0.82 (0.32-2.12)<br>0.40 (0.05-3.21)<br>0.287 | 0.137         | Diastolic Blood Pressure (mmHg)<br>ESH classification<br>< 80<br>80-84<br>85-89<br>90-99<br>100-109<br>>= 110<br>p-trend      |
| 1 (referent)<br>1.12 (0.76-1.64)<br>1.25 (0.85-1.86)<br>1.60 (1.04-2.45)<br>0.016                                         | 0.819         | 1 (referent)<br>1.30 (0.72-2.36)<br>1.60 (0.86-3.01)<br>2.61 (1.33-5.12)<br>0.003                                         | 1 (referent)<br>1.18 (0.82-1.70)<br>1.26 (0.85-1.87)<br>1.40 (0.88-2.20)<br>0.149                                         | 0.125         | 1 (referent)<br>1.20 (0.82-1.75)<br>1.30 (0.86-1.97)<br>1.63 (1.02-2.61)<br>0.041                                         | 1 (referent)<br>1.31 (0.76-2.25)<br>1.57 (0.89-2.78)<br>1.93 (1.03-3.64)<br>0.027                                         | 0.772         | 1 (referent)<br>1.28 (0.90-1.81)<br>1.69 (1.15-2.47)<br>2.10 (1.33-3.32)<br>0.0004                                         | two cases in referent<br>-<br>-<br>-                                                                                      | -             | Systolic Blood Pressure (mmHg)<br>ASH classification<br>< 120<br>120-139<br>140-159<br>>= 160<br>p-trend                      |
| 1 (referent)<br>1.00 (0.76-1.31)<br>0.85 (0.61-1.18)<br>1.11 (0.71-1.72)<br>0.776                                         | 0.721         | 1 (referent)<br>0.92 (0.60-1.41)<br>0.79 (0.46-1.36)<br>1.55 (0.81-2.95)<br>0.704                                         | 1 (referent)<br>1.06 (0.80-1.40)<br>0.97 (0.69-1.38)<br>0.97 (0.59-1.62)<br>0.873                                         | 0.924         | 1 (referent)<br>0.87 (0.65-1.17)<br>0.88 (0.61-1.27)<br>1.00 (0.59-1.70)<br>0.651                                         | 1 (referent)<br>1.28 (0.86-1.91)<br>1.02 (0.63-1.66)<br>1.44 (0.78-2.65)<br>0.487                                         | 0.347         | 1 (referent)<br>1.03 (0.78-1.35)<br>1.23 (0.87-1.73)<br>1.43 (0.83-2.46)<br>0.138                                          | 1 (referent)<br>0.69 (0.31-1.53)<br>0.56 (0.24-1.30)<br>0.75 (0.29-1.89)<br>0.48                                          | 0.24          | Diastolic Blood Pressure (mmHg)<br>ASH classification<br>< 80<br>80-89<br>90-99<br>>= 100<br>p-trend                          |
| 1 (referent)<br>1.22 (0.81-1.84)<br>1.34 (0.90-1.98)<br>1.27 (0.86-1.89)<br>0.29                                          | 0.954         | 1 (referent)<br>1.17 (0.64-2.15)<br>1.24 (0.68-2.26)<br>1.48 (0.82-2.68)<br>0.176                                         | 1 (referent)<br>1.25 (0.84-1.88)<br>1.36 (0.92-2.02)<br>1.21 (0.80-1.81)<br>0.468                                         | 0.614         | 1 (referent)<br>1.09 (0.73-1.62)<br>1.18 (0.79-1.75)<br>1.15 (0.77-1.72)<br>0.486                                         | 1 (referent)<br>1.75 (0.92-3.33)<br>1.87 (1.00-3.53)<br>1.82 (0.96-3.43)<br>0.146                                         | 0.392         | 1 (referent)<br>1.15 (0.79-1.68)<br>1.45 (1.00-2.11)<br>1.53 (1.04-2.26)<br>0.015                                          | two cases in referent<br>-<br>-<br>-                                                                                      | -             | Mean BP (mmHg) (1/3SBP+2/3DBP)<br>Cohort-specific quartiles<br>50.0-88.3<br>88.5-96.6<br>96.8-105.5<br>105.6-216.6<br>p-trend |
| 1 (referent)<br>1.22 (0.96-1.55)                                                                                          | 0.545         | 1 (referent)<br>1.36 (0.92-2.01)                                                                                          | 1 (referent)<br>1.22 (0.95-1.58)                                                                                          | 0.564         | 1 (referent)<br>1.24 (0.95-1.62)                                                                                          | 1 (referent)<br>1.36 (0.96-1.92)                                                                                          | 0.621         | -<br>1 (referent)                                                                                                          | -<br>0.79 (0.57-1.09)                                                                                                     | -             | Hypertension (SBP >= 140 mmHg, or DBP >= 90 mmHg, or self-reported)<br>Normotensive<br>Hypertensive                           |

| Other location or morphology                                                     |        | Excluding first 2 years of follow-up |                     |                     | Men                 | Women               | Sex                 | BMI <= 25 mg/m <sup>2</sup> | BMI > 25 mg/m <sup>2</sup> | BMI                 | Age <= 53 yrs |                     |
|----------------------------------------------------------------------------------|--------|--------------------------------------|---------------------|---------------------|---------------------|---------------------|---------------------|-----------------------------|----------------------------|---------------------|---------------|---------------------|
| Cases                                                                            | Cohort | HR (crude)                           | HR (adjusted)       | HR (adjusted)       | HR (adjusted)       | HR (adjusted)       | p-interaction       | HR (adjusted)               | HR (adjusted)              | p-interaction       | HR (adjusted) |                     |
| Cases                                                                            |        | 2492                                 | 2492                | 2261                | 1232                | 1260                |                     | 1035                        | 1457                       |                     | 756           |                     |
| Cohort size                                                                      |        | 307318                               | 307318              | 301857              | 112591              | 194727              |                     | 146326                      | 160992                     |                     | 153303        |                     |
| <b>Mean Systolic Blood Pressure continuous (per 10mmHg increase)</b>             | 2492   | 307318                               | 1.032 (1.010-1.053) | 1.016 (0.994-1.039) | 1.019 (0.996-1.043) | 0.990 (0.959-1.023) | 1.041 (1.010-1.073) | 0.148                       | 1.034 (0.999-1.070)        | 1.005 (0.977-1.034) | 0.369         | 0.994 (0.949-1.042) |
| <b>Mean Diastolic Blood Pressure continuous (per 10mmHg increase)</b>            | 2492   | 307318                               | 1.054 (1.015-1.095) | 1.018 (0.978-1.059) | 1.023 (0.981-1.066) | 0.984 (0.930-1.042) | 1.058 (1.001-1.118) | 0.109                       | 1.029 (0.966-1.095)        | 1.009 (0.959-1.062) | 0.572         | 0.983 (0.912-1.060) |
| <b>Mean Blood Pressure (1/3SBP+2/3DBP) continuous (per 10mmHg increase)</b>      | 2492   | 307318                               | 1.051 (1.018-1.085) | 1.022 (0.988-1.057) | 1.026 (0.991-1.063) | 0.985 (0.937-1.035) | 1.061 (1.013-1.112) | 0.098                       | 1.041 (0.987-1.097)        | 1.008 (0.965-1.053) | 0.437         | 0.987 (0.923-1.056) |
| <b>Systolic Blood Pressure (mmHg) ESH classification</b>                         |        |                                      |                     |                     |                     |                     |                     |                             |                            |                     |               |                     |
| < 120                                                                            | 438    | 86141                                | 1 (referent)        |                             | 1 (referent)               | 1 (referent)        |               | 1 (referent)        |
| 120-129                                                                          | 451    | 66446                                | 1.07 (0.93-1.22)    | 1.01 (0.88-1.15)    | 1.01 (0.87-1.16)    | 1.01 (0.83-1.24)    | 0.98 (0.82-1.18)    |                             | 1.01 (0.84-1.22)           | 0.99 (0.81-1.20)    |               | 0.89 (0.72-1.08)    |
| 130-139                                                                          | 526    | 57482                                | 1.25 (1.10-1.43)    | 1.16 (1.01-1.32)    | 1.13 (0.98-1.30)    | 1.03 (0.84-1.26)    | 1.29 (1.08-1.55)    |                             | 1.22 (1.01-1.48)           | 1.09 (0.90-1.31)    |               | 1.18 (0.96-1.45)    |
| 140-159                                                                          | 692    | 68235                                | 1.14 (1.00-1.29)    | 1.04 (0.91-1.18)    | 1.04 (0.91-1.19)    | 0.93 (0.77-1.13)    | 1.15 (0.96-1.37)    | 0.098                       | 1.11 (0.91-1.34)           | 0.98 (0.82-1.18)    | 0.242         | 1.02 (0.82-1.28)    |
| 160-179                                                                          | 304    | 22656                                | 1.33 (1.14-1.56)    | 1.21 (1.03-1.42)    | 1.21 (1.03-1.42)    | 1.26 (1.07-1.49)    | 1.08 (0.85-1.37)    |                             | 1.27 (0.98-1.65)           | 1.15 (0.93-1.43)    |               | 1.10 (0.76-1.59)    |
| >= 180                                                                           | 81     | 6358                                 | 1.22 (0.95-1.56)    | 1.10 (0.86-1.41)    | 1.10 (0.84-1.42)    | 0.82 (0.57-1.20)    | 1.44 (1.03-2.01)    |                             | 1.55 (1.05-2.30)           | 0.90 (0.65-1.24)    |               | 0.29 (0.07-1.17)    |
| p-trend                                                                          |        |                                      | 0.0009              | 0.065               | 0.041               | 0.602               | 0.002               |                             | 0.015                      | 0.669               |               | 0.625               |
| <b>Diastolic Blood Pressure (mmHg) ESH classification</b>                        |        |                                      |                     |                     |                     |                     |                     |                             |                            |                     |               |                     |
| < 80                                                                             | 868    | 132590                               | 1 (referent)        |                             | 1 (referent)               | 1 (referent)        |               | 1 (referent)        |
| 80-84                                                                            | 555    | 64872                                | 1.09 (0.98-1.21)    | 1.04 (0.93-1.16)    | 1.04 (0.93-1.16)    | 0.96 (0.82-1.13)    | 1.12 (0.96-1.30)    |                             | 1.14 (0.97-1.34)           | 0.96 (0.83-1.12)    |               | 1.04 (0.86-1.26)    |
| 85-89                                                                            | 384    | 41500                                | 1.11 (0.99-1.26)    | 1.05 (0.93-1.19)    | 1.04 (0.91-1.18)    | 0.96 (0.80-1.14)    | 1.14 (0.96-1.36)    |                             | 1.22 (1.01-1.47)           | 0.94 (0.80-1.11)    |               | 1.07 (0.85-1.35)    |
| 90-99                                                                            | 495    | 51196                                | 1.10 (0.98-1.23)    | 1.01 (0.90-1.14)    | 1.03 (0.92-1.17)    | 0.91 (0.77-1.07)    | 1.14 (0.96-1.34)    | 0.118                       | 1.03 (0.85-1.25)           | 0.98 (0.84-1.13)    | 0.52          | 1.06 (0.85-1.32)    |
| 100-109                                                                          | 160    | 13896                                | 1.28 (1.08-1.52)    | 1.15 (0.97-1.37)    | 1.18 (0.98-1.41)    | 1.06 (0.84-1.33)    | 1.26 (0.96-1.66)    |                             | 1.02 (0.72-1.43)           | 1.16 (0.94-1.42)    |               | 0.97 (0.65-1.44)    |
| >= 110                                                                           | 30     | 3264                                 | 1.07 (0.74-1.54)    | 0.94 (0.65-1.35)    | 0.79 (0.52-1.21)    | 0.83 (0.52-1.33)    | 1.09 (0.60-1.98)    |                             | 1.43 (0.74-2.77)           | 0.80 (0.51-1.24)    |               | 1.05 (0.49-2.24)    |
| p-trend                                                                          |        |                                      | 0.011               | 0.438               | 0.414               | 0.521               | 0.047               |                             | 0.345                      | 0.789               |               | 0.691               |
| <b>Systolic Blood Pressure (mmHg) ASH classification</b>                         |        |                                      |                     |                     |                     |                     |                     |                             |                            |                     |               |                     |
| < 120                                                                            | 438    | 86141                                | 1 (referent)        |                             | 1 (referent)               | 1 (referent)        |               | 1 (referent)        |
| 120-139                                                                          | 977    | 123928                               | 1.15 (1.03-1.30)    | 1.08 (0.96-1.21)    | 1.07 (0.94-1.21)    | 1.02 (0.85-1.22)    | 1.12 (0.96-1.31)    |                             | 1.10 (0.94-1.30)           | 1.04 (0.88-1.24)    |               | 1.01 (0.85-1.20)    |
| 140-159                                                                          | 692    | 68235                                | 1.13 (1.00-1.29)    | 1.03 (0.90-1.18)    | 1.03 (0.90-1.19)    | 0.93 (0.77-1.14)    | 1.13 (0.95-1.35)    | 0.258                       | 1.10 (0.91-1.33)           | 0.98 (0.81-1.17)    | 0.407         | 1.01 (0.81-1.27)    |
| >= 160                                                                           | 385    | 29014                                | 1.30 (1.12-1.51)    | 1.18 (1.01-1.37)    | 1.21 (1.04-1.42)    | 1.02 (0.82-1.28)    | 1.34 (1.09-1.65)    |                             | 1.32 (1.04-1.67)           | 1.09 (0.89-1.34)    |               | 0.94 (0.65-1.35)    |
| p-trend                                                                          |        |                                      | 0.003               | 0.122               | 0.054               | 0.753               | 0.012               |                             | 0.049                      | 0.645               |               | 0.888               |
| <b>Diastolic Blood Pressure (mmHg) ASH classification</b>                        |        |                                      |                     |                     |                     |                     |                     |                             |                            |                     |               |                     |
| < 80                                                                             | 868    | 132590                               | 1 (referent)        |                             | 1 (referent)               | 1 (referent)        |               | 1 (referent)        |
| 80-89                                                                            | 939    | 106372                               | 1.10 (1.00-1.21)    | 1.04 (0.95-1.15)    | 1.04 (0.94-1.15)    | 0.96 (0.84-1.11)    | 1.13 (0.99-1.28)    |                             | 1.17 (1.02-1.35)           | 0.95 (0.84-1.09)    |               | 1.05 (0.89-1.25)    |
| 90-99                                                                            | 495    | 51196                                | 1.10 (0.98-1.23)    | 1.01 (0.90-1.14)    | 1.03 (0.92-1.17)    | 0.91 (0.77-1.07)    | 1.14 (0.96-1.34)    | 0.135                       | 1.03 (0.85-1.25)           | 0.98 (0.84-1.13)    | 0.667         | 1.06 (0.85-1.32)    |
| >= 100                                                                           | 190    | 17160                                | 1.24 (1.06-1.45)    | 1.11 (0.94-1.31)    | 1.10 (0.93-1.31)    | 1.01 (0.82-1.26)    | 1.23 (0.96-1.59)    |                             | 1.08 (0.79-1.47)           | 1.09 (0.90-1.32)    |               | 0.98 (0.68-1.41)    |
| p-trend                                                                          |        |                                      | 0.008               | 0.353               | 0.302               | 0.615               | 0.038               |                             | 0.395                      | 0.602               |               | 0.742               |
| <b>Mean BP (mmHg) (1/3SBP+2/3DBP) Cohort-specific quartiles</b>                  |        |                                      |                     |                     |                     |                     |                     |                             |                            |                     |               |                     |
| 50.0-88.3                                                                        | 408    | 76991                                | 1 (referent)        |                             | 1 (referent)               | 1 (referent)        |               | 1 (referent)        |
| 88.5-96.6                                                                        | 565    | 77727                                | 1.10 (0.96-1.25)    | 1.04 (0.91-1.18)    | 1.03 (0.89-1.18)    | 0.99 (0.81-1.21)    | 1.07 (0.90-1.27)    |                             | 1.02 (0.86-1.22)           | 1.03 (0.85-1.26)    |               | 0.83 (0.68-1.01)    |
| 96.8-105.5                                                                       | 695    | 76327                                | 1.18 (1.04-1.33)    | 1.09 (0.95-1.23)    | 1.10 (0.96-1.26)    | 0.97 (0.80-1.19)    | 1.19 (1.00-1.41)    | 0.022                       | 1.17 (0.97-1.39)           | 1.02 (0.85-1.23)    | 0.359         | 1.07 (0.87-1.31)    |
| 105.6-216.6                                                                      | 824    | 76273                                | 1.19 (1.05-1.35)    | 1.07 (0.94-1.22)    | 1.08 (0.94-1.24)    | 0.90 (0.74-1.10)    | 1.26 (1.06-1.50)    |                             | 1.11 (0.92-1.35)           | 1.03 (0.85-1.24)    |               | 0.92 (0.73-1.17)    |
| p-trend                                                                          |        |                                      | 0.005               | 0.292               | 0.199               | 0.208               | 0.005               |                             | 0.134                      | 0.884               |               | 0.918               |
| <b>Hypertension (SBP &gt;= 140 mmHg, or DBP &gt;= 90 mmHg, or self-reported)</b> |        |                                      |                     |                     |                     |                     |                     |                             |                            |                     |               |                     |
| Normotensive                                                                     | 1166   | 174179                               | 1 (referent)        |                             | 1 (referent)               | 1 (referent)        |               | 1 (referent)        |
| Hypertensive                                                                     | 1326   | 133139                               | 1.07 (0.99-1.16)    | 1.02 (0.94-1.11)    | 1.04 (0.95-1.13)    | 0.95 (0.84-1.07)    | 1.11 (0.98-1.25)    | 0.234                       | 1.05 (0.92-1.19)           | 1.01 (0.90-1.13)    | 0.786         | 0.96 (0.82-1.13)    |
